# Supplementary material for: Amino acid pathways are central for defense in Arabidopsis revealed by time-resolved, integrated multi-omics analysis
Source: Research Square preprint supplement (doi:10.21203/rs.3.rs-5659933/v1), 2025-01-06
Supplement: Supplementary file 1 [file 4cb26d52fa9adb82d163d7f3.xlsx]

## Sheet: 1_Shoots_raw
Raw metabolite data for shoot samples														sample name: treatment_timepoint_injection number_replicate
index	annotation name	ionMz	ionActive	ionAverageInt	ionQualTIC	Top annotation ids	Top annotation formula	Top annotation ion	Top annotation score	ionIdx	ionMz	inchi	custom class	expblank_exctrl_1_2413	expblank_exctrl_1_2623	expblank_exctrl_2_2415	expblank_exctrl_2_2621	mock_tp1_2201_1	mock_tp1_2201_2	mock_tp1_2201_3	mock_tp1_2201_4	mock_tp1_2201_5	mock_tp2_2203_1	mock_tp2_2203_2	mock_tp2_2203_3	mock_tp2_2203_4	mock_tp2_2203_5	mock_tp3_2205_1	mock_tp3_2205_2	mock_tp3_2205_3	mock_tp3_2205_4	mock_tp3_2205_5	mock_tp4_2207_1	mock_tp4_2207_2	mock_tp4_2207_3	mock_tp4_2207_4	mock_tp4_2207_5	mock_tp5_2209_1	mock_tp5_2209_2	mock_tp5_2209_3	mock_tp5_2209_4	mock_tp5_2209_5	mock_tp6_2211_1	mock_tp6_2211_2	mock_tp6_2211_3	mock_tp6_2211_4	mock_tp6_2211_5	mock_tp7_2213_1	mock_tp7_2213_2
1	Acrolein	55.0183	1	5456.79	0.800456	C01471; C05986	C3H4O	-H(-)	100	1	55.0183	HGINCPLSRVDWNT-UHFFFAOYSA-N	Carbonyl compounds	171	319	189	317	1705	1417	2378	1732	1837	1252	1500	1380	1437	1507	1726	1575	1431	1484	1630	1150	1287	1691	1402	1098	1441	1396	1166	1357	1212	1405	1211	1100	1283	1285	1338	1415
2	Glyoxal	56.9977	1	968.004	0.572836	C14448	C2H2O2	-H(-)	100	2	56.9977	LEQAOMBKQFMDFZ-UHFFFAOYSA-N	Carbonyl compounds	38	113	32	132	241	280	322	342	338	350	269	403	337	305	375	346	244	423	292	378	373	441	301	298	303	345	269	275	267	346	272	318	318	333	310	428
3	Acetone	57.0342	1	18309.3	0.705397	C00207; C00479; C02001; C11506; C11507; C15508	C3H6O	-H(-)	100	3	57.0342	CSCPPACGZOOCGX-UHFFFAOYSA-N	Carbonyl compounds	783	1159	836	1437	6580	6323	7383	6866	7582	5870	6617	5758	4567	4647	5963	5566	5700	5065	6767	3719	5780	7503	5256	4977	5921	4937	4927	5040	5086	6372	5992	5666	6047	6134	6573	6614
4	Potassium acetate	58.0057	1	763.891	0.507145	C12554	C2H3O2.	-H(-)	100	4	58.0057	SCVFZCLFOSHCOH-UHFFFAOYSA-M	Organic acids and derivatives	40	134	95	157	212	259	1134	341	438	346	336	233	280	307	281	252	283	292	258	210	185	191	406	322	226	298	288	384	220	318	275	255	351	181	191	181
5	Acetamide	58.0294	1	2180.96	0.678718	C06244; C06735; C11489	C2H5NO	-H(-)	100	5	58.0294	DLFVBJFMPXGRIB-UHFFFAOYSA-N	Organic acids and derivatives	128	150	114	182	673	642	497	693	737	799	1000	891	662	698	914	763	878	836	742	688	706	748	553	552	871	828	775	838	821	796	736	601	773	921	625	813
6	Acetatic acid	59.0135	1	285339	0.923019	C00033; C00266	C2H4O2	-H(-)	100	6	59.0135	QTBSBXVTEAMEQO-UHFFFAOYSA-N	Organic acids and derivatives	38162	41415	45847	54744	205192	250372	389139	196625	221377	212997	285995	196625	188074	203940	200395	188374	227278	195579	234461	159064	171723	196625	157722	151777	206759	183651	161636	210212	187872	203758	191567	174260	195410	191463	189792	223650
7	Propanol	59.0495	1	3110.99	0.187069	C01845; C05979	C3H8O	-H(-)	100	7	59.0495	KFZMGEQAYNKOFK-UHFFFAOYSA-N	Alcohols and polyols	920	426	1256	771	2558	2281	2229	2887	3460	2530	2053	2234	2429	2642	2301	3085	2429	2064	2532	2814	2689	2705	2275	2284	2672	3378	2944	3144	2690	3309	2475	2507	3412	2651	2187	2596
8	Ethylene glycol	61.0293	1	955.081	0.759034	C01380; C15588	C2H6O2	-H(-)	100	8	61.0293	LYCAIKOWRPUZTN-UHFFFAOYSA-N	Alcohols and polyols	609	976	553	439	739	606	635	1325	845	851	929	947	882	1277	811	765	586	532	834	628	594	763	627	570	646	1015	671	876	746	704	557	755	726	612	409	1067
9	Butynal	67.0187	1	3669.8	0.673028	C06145; C14275	C4H4O	-H(-)	100	9	67.0187	OGQNOIVDVXRWRE-UHFFFAOYSA-N	Carbonyl compounds	336	1128	185	1532	1169	999	983	1087	1186	897	971	786	943	1043	1177	1034	1165	1042	1346	604	895	1183	887	942	839	1013	872	896	936	1022	713	1054	829	861	924	1028
10	Butynol	69.0346	1	3352.45	0.715693	C06146; C17721; C19377; C20701	C4H6O	-H(-)	100	10	69.0346	OTJZCIYGRUNXTP-UHFFFAOYSA-N	Acetylides	779	1274	917	1044	1475	1810	1405	1817	1754	1388	1739	1671	1552	1467	1850	1494	1740	1756	1433	1618	1538	1399	1490	1352	1720	1387	1456	1723	1660	1353	1756	1420	1478	1650	1397	1918
11	Acrylamide	70.0296	1	10941.4	0.822366	C01659	C3H5NO	-H(-)	100	11	70.0296	HRPVXLWXLXDGHG-UHFFFAOYSA-N	Organic acids and derivatives	89	78	52	74	1258	1096	946	1220	1291	1316	1412	1221	1070	1109	1187	1178	1198	1221	1499	1083	1031	1336	1120	906	1422	1562	1225	1271	1597	2075	1699	1952	1946	2322	627	1117
12	Propenoic acid C3:1	71.0138	1	70579.9	0.506147	C00511; C00546; C19246; C19297; C19440	C3H4O2	-H(-)	100	12	71.0138	NIXOWILDQLNWCW-UHFFFAOYSA-N	Organic acids and derivatives	2277	1521	2193	1828	13587	14428	22197	15238	15506	15717	12791	14510	14045	14984	15202	14125	17242	14336	19978	10988	13076	16704	13567	12104	12541	13933	12219	12199	11889	13729	12815	13662	15565	13230	13173	15951
13	Butanal	71.0506	1	2579.31	0.644596	C01412; C02845; C19237	C4H8O	-H(-)	100	13	71.0506	ZTQSAGDEMFDKMZ-UHFFFAOYSA-N	Carbonyl compounds	1006	1296	1066	832	1949	1685	1875	1682	1444	1548	2122	1144	1382	1639	2041	1259	1585	1388	1871	1380	1800	1465	1469	1583	1204	1250	1164	1369	1209	1441	1012	1690	1523	1690	1169	1348
14	Iminoacetate	72.0089	1	7240.97	0.765459	C15809	C2H3NO2	-H(-)	100	14	72.0089	TVMUHOAONWHJBV-UHFFFAOYSA-N	Organic acids and derivatives	160	119	144	136	1137	1103	1141	1316	1345	1034	1236	1217	1349	1370	1092	1176	995	1145	1302	908	1053	1197	1189	890	1309	1525	1130	1227	1503	1938	1670	1763	1882	2157	776	937
15	Glyoxylic acid	72.9933	1	15678.1	0.723077	C00048	C2H2O3	-H(-)	100	15	72.9933	HHLFWLYXYJOTON-UHFFFAOYSA-N	Organic acids and derivatives	1371	951	1364	1479	2224	2346	1917	2278	2192	2548	2196	2452	2499	2683	2320	2294	2720	2139	2598	2099	2298	2378	2197	1802	1905	2173	1957	2218	2088	2331	2020	2215	2276	1987	2406	2393
16	Ethylnitronate	73.0179	1	1138.16	0.582309	C18091	C2H4NO2	-H(-)	100	16	73.0179	YERBBVNYIKLXDM-UHFFFAOYSA-N	Organic 1,3-dipolar compounds	41	86	56	89	348	293	532	305	296	343	427	378	324	442	370	302	360	369	532	314	402	320	349	274	237	240	247	220	256	282	258	403	326	309	375	422
17	C3:0 (Propionic acid)	73.0293	1	18272	0.662347	C00163; C00424; C00937; C00969; C05235; C05999; C10920; C17530	C3H6O2	-H(-)	100	17	73.0293	XBDQKXXYIPTUBI-UHFFFAOYSA-N	Organic acids and derivatives	652	878	635	1103	5881	5117	9251	5405	6035	5775	5450	5227	4935	5732	5699	5273	5956	5673	7829	4441	5188	5798	5421	4590	4228	4478	3947	4936	3544	4859	4759	5038	5128	4947	4479	5085
18	Glycine	74.0247	1	19904.8	0.763119	C00037; C01837; C06808; C19445	C2H5NO2	-H(-)	100	18	74.0247	DHMQDGOQFOQNFH-UHFFFAOYSA-N	Amino acids, peptides, and analogues	431	560	419	372	5962	6296	3850	4132	4619	5309	7780	4728	4480	4940	6005	5294	5115	4711	5808	3772	4310	4166	3315	2718	4481	5175	3872	4024	3812	5337	5219	5432	5204	5506	7671	8670
19	Thioacetic acid	74.991	1	751.946	0.698637	C01857	C2H4OS	-H(-)	100	19	74.991	DUYAAUVXQSMXQP-UHFFFAOYSA-N	Organic acids and derivatives	51	112	5	42	192	289	276	221	183	281	270	232	242	363	341	276	270	298	316	343	216	284	284	141	199	209	194	205	187	383	331	252	327	227	301	372
20	Glycolate	75.0089	1	9689.92	0.827974	C00160	C2H4O3	-H(-)	100	20	75.0089	AEMRFAOFKBGASW-UHFFFAOYSA-N	Organic acids and derivatives	633	474	717	681	1851	2344	2452	2335	2388	2380	1861	2514	2509	2874	2573	2768	1852	2947	2808	2279	2708	2585	2245	2060	1867	2026	1628	1735	1996	2386	2409	2353	2685	2236	2923	2689
21	Propanediol	75.045	1	2097.81	0.0265715	C00583; C02457; C02912; C02917	C3H8O2	-H(-)	100	21	75.045	DNIAPMSPPWPWGF-UHFFFAOYSA-N	Alcohols and polyols	2157	2154	2271	2068	1833	1680	1911	2505	2132	1534	2749	1451	2486	1503	2092	1710	2284	1717	1876	1098	3189	1809	1521	2047	2139	1398	1857	1857	2053	1663	1551	1942	1747	1746	2091	2001
22	DMSO	77.006	1	8498.36	0.669052	C00928; C11143	C2H6OS	-H(-)	100	22	77.006	DGVVWUTYPXICAM-UHFFFAOYSA-N	Organosulfur compounds	3881	4561	3246	2963	1990	2150	1796	2574	3892	2666	2444	2027	2948	1747	1809	2118	2280	2017	2260	2257	2677	3677	2129	2449	1827	2582	2418	3044	1849	3383	2293	2450	2445	3200	1830	2254
23	Cyclopentanone	83.0505	1	6879.12	0.623016	C00557; C07330	C5H8O	-H(-)	100	23	83.0505	BGTOWKSIORTVQH-UHFFFAOYSA-N	Carbonyl compounds	4480	4907	4061	5456	4286	4355	4224	4856	4761	4076	5668	3676	4553	4525	5010	4401	4694	4857	4589	4198	4971	4348	3956	4205	4912	4911	3725	4883	4547	4020	4143	4166	3711	4953	4376	4135
24	Acetone cyanohydrin	84.0454	1	7165.24	0.832862	C02659	C4H7NO	-H(-)	100	24	84.0454	MWFMGBPGAXYFAR-UHFFFAOYSA-N	Alcohols and polyols	37	66	44	97	1552	1078	1375	1483	1654	1416	1517	1390	1317	1378	1660	1553	1455	1706	1740	1242	1206	1427	1447	973	1283	1366	1284	1223	1390	1264	1155	1327	1279	1491	1060	1090
25	Succinic aldehyde	85.0295	1	32468.6	0.66068	C00741; C01770; C01771; C02497; C16267; C16835; C19201; C19309; C19443	C4H6O2	-H(-)	100	25	85.0295	QSJXEFYPDANLFS-UHFFFAOYSA-N	Carbonyl compounds	2338	4991	3383	6339	8158	9954	14183	10004	11027	9016	9864	9550	9812	14105	10706	10634	10695	10581	11277	6104	7664	10427	7516	7668	14891	11319	7906	13500	12123	10352	9599	9285	10713	10142	10613	10087
26	Prenol	85.0661	1	1233.73	0.626789	C01390; C01949; C02020; C02223; C07329	C5H10O	-H(-)	100	26	85.0661	ASUAYTHWZCLXAN-UHFFFAOYSA-N	Alcohols and polyols	383	606	504	865	1087	858	860	1117	874	825	1335	579	860	1003	646	758	892	820	832	533	831	767	546	566	871	836	512	711	1087	764	804	554	807	774	934	825
27	Dehydroalanine	86.0248	1	4599.29	0.669692	C02218; C06695; C20253	C3H5NO2	-H(-)	100	27	86.0248	UQBOJOOOTLPNST-UHFFFAOYSA-N	Amino acids, peptides, and analogues	454	359	503	450	1273	926	963	1232	1064	1924	1498	2082	1674	1560	1946	1350	2436	1508	2615	1343	1503	1761	1386	1172	2411	2332	2263	1963	1916	1666	1312	1441	1450	1792	1389	1735
28	4-Aminobutyraldehyde	86.0609	1	448.401	0.71248	C00555; C03219; C14452; C19332; C20315; C20339	C4H9NO	-H(-)	100	28	86.0609	DZQLQEYLEYWJIB-UHFFFAOYSA-N	Carbonyl compounds	43	45	56	79	187	166	310	279	214	289	218	216	192	176	206	325	358	188	259	245	153	276	221	146	232	182	133	171	203	311	228	260	313	169	184	245
29	Pyruvate	87.0088	1	51950.3	0.943892	C00022; C00222; C12069; C20363	C3H4O3	-H(-)	100	29	87.0088	LCTONWCANYUPML-UHFFFAOYSA-N	Organic acids and derivatives	517	2856	481	3650	6367	7197	8063	7666	9511	7757	7665	6910	8721	8701	8080	6672	9115	7000	8880	7085	6561	7657	6774	5740	6405	7715	7655	6988	6447	6621	6242	5739	5944	6858	7770	7245
30	C4:0 (Butyric acid)	87.0453	1	3592.16	0.74654	C00246; C00466; C00810; C00849; C01769; C02632; C14440	C4H8O2	-H(-)	100	30	87.0453	FERIUCNNQQJTOY-UHFFFAOYSA-N	Lipids and lipid-like molecules	700	1249	682	960	1505	1708	3092	1769	1684	1659	1932	1600	1731	1713	2045	1687	1647	1893	2004	1486	1401	1746	1201	1197	1835	1985	1341	1822	1735	1826	1736	1501	1719	1495	1610	1628
31	Dimethylurea	87.0563	1	802.318	0.634438	C16364; C19281; C19779	C3H8N2O	-H(-)	100	31	87.0563	MGJKQDOBUOMPEZ-UHFFFAOYSA-N	Organic acids and derivatives	86	236	115	135	316	500	591	422	572	454	371	368	338	294	466	300	320	323	477	352	404	437	317	331	401	476	396	350	487	401	356	376	364	414	289	363
32	Oxamic acid	88.0042	1	2108.72	0.702621	C01444	C2H3NO3	-H(-)	100	32	88.0042	SOWBFZRMHSNYGE-UHFFFAOYSA-N	Amino acids, peptides, and analogues	377	533	424	425	402	359	363	500	395	480	343	424	650	605	398	425	300	487	352	488	437	408	477	408	462	360	618	366	427	314	391	309	347	301	285	330
33	Alanine	88.0405	1	19035.3	0.856122	C00041; C00099; C00133; C00213; C01401; C01537; C02116; C11488	C3H7NO2	-H(-)	100	33	88.0405	QNAYBMKLOCPYGJ-REOHCLBHSA-N	Amino acids, peptides, and analogues	101	127	148	120	3317	2695	2338	2462	3032	2968	2500	2349	2457	2857	2931	2737	2403	2562	3274	2202	2208	2688	2454	1758	1379	1670	1801	1900	1524	1605	1536	1818	1699	1578	2531	2533
34	Oxalic acid	88.9881	1	4902.38	0.786562	C00209; C18586	C2H2O4	-H(-)	100	34	88.9881	MUBZPKHOEPUJKR-UHFFFAOYSA-N	Organic acids and derivatives	255	267	180	350	816	839	735	824	869	862	943	828	873	967	783	752	799	833	851	941	716	701	808	777	762	790	687	816	887	937	715	862	824	834	732	623
35	Propanethial S-oxide	89.0072	1	1049.04	0.419628	C08389	C3H6OS	-H(-)	100	35	89.0072	BAZSXBOAXJLRNH-UHFFFAOYSA-N	Organosulfur compounds	47	95	40	40	289	231	924	238	346	296	247	315	270	279	339	302	315	279	338	225	204	220	226	260	267	273	261	367	276	297	220	338	228	279	296	268
36	Lactate	89.0247	1	34010.1	0.895105	C00184; C00186; C00256; C00577; C01013; C01432; C02154; C02426	C3H6O3	-H(-)	100	36	89.0247	RXKJFZQQPQGTFL-UHFFFAOYSA-N	Carbohydrates and carbohydrate conjugates	375	1478	404	853	5723	5813	32792	5714	6765	6422	5882	5406	5592	5749	5929	5760	5985	5562	6974	4894	5279	5320	5346	4090	4521	4979	4346	6240	4914	5541	4699	5253	5578	5155	5367	7384
37	Methylazoxymethanol	89.0353	1	8039.38	0.926124	C02390; C06384; C20301	C2H6N2O2	-H(-)	100	37	89.0353	BJNBRIBHKLJMAG-ARJAWSKDSA-N	Organic 1,3-dipolar compounds	54	343	69	186	1809	2067	7778	1679	2022	2096	2125	1824	1571	1704	1724	1609	1782	1495	1829	1342	1738	1593	1669	1352	1803	2173	1803	2431	1836	2840	2567	2778	3285	2981	1708	2294
38	Thioglycolic acid	90.9864	1	623.98	0.416412	C02086	C2H4O2S	-H(-)	100	38	90.9864	CWERGRDVMFNCDR-UHFFFAOYSA-N	Organic acids and derivatives	106	316	67	475	216	405	309	436	397	280	458	371	279	314	388	388	384	476	493	448	521	521	390	355	330	430	353	217	425	231	469	405	293	366	517	352
39	Glycerol	91.0401	1	1264.59	0.758732	C00116	C3H8O3	-H(-)	100	39	91.0401	PEDCQBHIVMGVHV-UHFFFAOYSA-N	Carbohydrates and carbohydrate conjugates	192	148	132	277	415	617	439	445	538	485	600	474	710	875	443	407	442	698	615	413	1463	530	700	513	467	539	439	479	391	628	326	462	511	413	498	243
40	Phenol	93.0346	1	7333.08	0.73459	C00146; C01782; C15584	C6H6O	-H(-)	100	40	93.0346	ISWSIDIOOBJBQZ-UHFFFAOYSA-N	Benzenoids	862	1046	843	1097	2737	2833	3450	3659	3845	4019	2810	3471	3381	3923	3904	3510	3722	4147	4656	2802	3376	4332	4210	3258	3105	3304	3537	2844	3074	3206	2999	3420	3547	3809	3361	3548
41	Hydroxypyridine	94.0304	1	1419.26	0.415044	C02502	C5H5NO	-H(-)	100	41	94.0304	UBQKCCHYAOITMY-UHFFFAOYSA-N	Organoheterocyclic compounds	314	752	496	585	714	840	668	620	1058	535	725	1049	943	442	709	681	929	738	849	812	660	806	758	842	612	947	655	470	674	770	568	576	630	774	666	799
42	Methanesulfonic acid	94.9813	1	4750.57	-0.0409226	C11145	CH4SO3	-H(-)	100	42	94.9813	AFVFQIVMOAPDHO-UHFFFAOYSA-N	Organic acids and derivatives	3395	4191	3656	3532	4773	3433	4546	3501	3977	4561	4988	3985	4933	4572	3658	3553	4380	3691	3361	3300	4890	4843	3630	3232	3835	4085	3801	4298	3786	3800	3672	4459	4368	4163	3614	4259
43	Furfural	95.0148	1	3504.73	0.771012	C07090; C14279	C5H4O2	-H(-)	100	43	95.0148	RNYZJZKPGHQTJR-UHFFFAOYSA-N	Organoheterocyclic compounds	163	388	289	425	1025	1169	2187	1033	1142	1142	1254	952	897	900	1014	822	1295	890	1104	997	1046	1021	846	866	937	908	767	927	825	1018	1089	1026	1193	1171	926	894
44	Cyclohexenone	95.0509	1	2844.66	0.710697	C02395; C19249	C6H8O	-H(-)	100	44	95.0509	FWFSEYBSWVRWGL-UHFFFAOYSA-N	Carbonyl compounds	1386	1327	1379	1255	1703	1681	1195	1542	1839	1257	1420	1127	1272	1538	1397	1429	1503	1096	1478	1401	1423	1582	1205	1033	1450	1617	1057	1207	1350	1515	1572	1172	1459	1151	1148	2006
45	Maleimide	96.0092	1	2493.59	0.755475	C07272	C4H3NO2	-H(-)	100	45	96.0092	PEEHTFAAVSWFBL-UHFFFAOYSA-N	Organoheterocyclic compounds	68	173	46	135	399	605	440	472	619	774	612	589	458	620	569	501	511	612	593	611	550	553	395	428	538	702	480	579	625	769	399	662	497	789	368	574
46	C5:2	97.0301	1	9519.56	0.878388	C20441; C20578	C5H6O2	-H(-)	100	46	97.0301	XPFVYQJUAUNWIW-UHFFFAOYSA-N	Organoheterocyclic compounds	1472	2230	1832	2931	2205	3342	3610	2914	2816	3002	3045	3002	3436	5062	3331	3320	3550	3704	3526	2142	1924	2422	2664	2313	6369	3558	2948	4779	4363	3405	2915	2611	3687	2931	3428	3407
47	Cyclohexanone	97.0663	1	3533.47	0.72837	C00414; C08497; C16310	C6H10O	-H(-)	100	47	97.0663	JHIVVAPYMSGYDF-UHFFFAOYSA-N	Carbonyl compounds	1725	1782	1927	1831	1970	2536	1651	2139	1950	1590	2250	1786	1806	1707	1777	1605	1541	2070	1778	1443	1778	1556	1617	1957	1927	1878	1750	1606	1544	2207	2398	1846	2092	1679	1844	1749
48	Succinimide	98.0247	1	22817.5	-0.245769	C07273; C11103	C4H5NO2	-H(-)	100	48	98.0247	KZNICNPSHKQLFF-UHFFFAOYSA-N	Organoheterocyclic compounds	14934	16992	15747	16055	19679	18345	18629	20379	18656	17800	18070	18896	19484	18531	18858	17603	17829	15560	19193	17209	16538	17705	16643	16980	17528	20209	20531	20385	20274	17513	17587	20560	18339	18298	16542	18358
49	N-Methyl-2-pyrrolidinone	98.0609	1	1602.17	0.514707	C11118; C18796	C5H9NO	-H(-)	100	49	98.0609	SECXISVLQFMRJM-UHFFFAOYSA-N	Organoheterocyclic compounds	325	427	283	242	776	681	645	1047	876	830	728	1044	866	1007	782	735	976	701	944	751	804	845	808	537	688	738	869	965	835	746	806	768	1011	1013	812	808
50	Succinic anhydride	99.0089	1	47225.5	0.357587	C19524	C4H4O3	-H(-)	100	50	99.0089	RINCXYDBBGOEEQ-UHFFFAOYSA-N	Organic acids and derivatives	8166	9063	7535	8805	22623	22041	21075	23536	25873	21778	23019	20370	20403	19781	22169	18894	25433	19690	28915	17218	19448	26693	19163	18402	18410	18653	19657	21350	19278	20310	18043	19662	20921	18593	19100	21123
51	Valerolactone	99.0451	1	25657.9	0.519698	C02240; C08279; C12518; C14527; C15499; C19238	C5H8O2	-H(-)	100	51	99.0451	OZJPLYNZGCXSJM-UHFFFAOYSA-N	Organoheterocyclic compounds	12065	15873	11447	16955	13674	13206	15388	14504	15765	13530	15944	13987	15451	14066	13589	12618	14291	14192	13752	12349	11593	14596	12950	12520	14246	14953	12116	14468	15675	13780	15031	14366	14546	13464	12891	14264
52	Gyromitrin	99.0566	1	7554.6	0.85066	C08305; C19285	C4H8N2O	-H(-)	100	52	99.0566	IMAGWKUTFZRWSB-HWKANZROSA-N	Organic nitrogen compounds	815	863	715	1129	4016	3235	3083	3468	4261	3892	4032	3409	3676	3498	3950	3756	3494	4287	4336	2895	3651	3389	3450	2379	3467	3551	3056	3083	3634	3336	2669	3149	3554	3380	2661	3269
53	Cyclohexanol	99.0819	1	4885.19	0.311099	C00854; C02373; C02893; C08492; C19263	C6H12O	-H(-)	100	53	99.0819	HPXRVTGHNJAIIH-UHFFFAOYSA-N	Alcohols and polyols	3658	6517	4839	5082	4360	3825	3478	4133	4550	3458	4569	3573	3869	4167	4620	3406	3610	4078	3830	3008	3276	3012	3256	3594	3029	4642	3266	4183	4205	4177	4107	3139	4006	4576	3068	5005
54	Homoserine lactone	100.04	1	20223.4	0.766629	C01234; C02926; C07509; C08267; C11106; C17234; C19456; C19777	C4H7NO2	-H(-)	100	54	100.04	PAJPWUMXBYXFCZ-UHFFFAOYSA-N	Amino acids, peptides, and analogues	550	659	721	942	4357	3674	3620	4438	4020	4522	4882	4825	4398	4523	5066	4612	4692	4487	5358	4246	4826	5218	4506	4034	4537	4970	4196	4959	4907	4855	4856	4648	4621	4798	4546	4504
55	Pentanamide	100.077	1	1744.96	0.468893	C01842; C03982; C10974; C12455; C17255; C19491; C20312	C5H11NO	-H(-)	100	55	100.077	IPWFJLQDVFKJDU-UHFFFAOYSA-N	Lipids and lipid-like molecules	1018	812	993	810	1530	1148	1090	1339	1868	1416	1692	1031	1534	1631	1402	1299	1552	1299	1287	1145	1379	1117	1446	1187	1512	1390	1204	1590	1352	1169	1473	1104	1331	1237	1390	1619
56	Oxobutanoic acid	101.025	1	61479.9	0.764111	C00109; C00164; C00232; C00349; C06002	C4H6O3	-H(-)	100	56	101.025	TYEYBOSBBBHJIV-UHFFFAOYSA-N	Organic acids and derivatives	1324	3656	1427	3591	14540	14412	86687	15236	17707	16411	15316	12908	13561	13841	15893	13848	15480	12747	17181	12519	12376	15792	13247	11362	11673	12421	12781	13705	11177	15119	13592	13186	14151	13018	13305	13359
57	NDEA	101.072	1	35644.7	0.506784	C14422	C4H10N2O	-H(-)	100	57	101.072	WBNQDOYYEUMPFS-UHFFFAOYSA-N	Organic nitrogen compounds	3851	3981	3545	3960	19457	15110	17267	20606	22549	19514	19729	17661	18886	18041	22353	19941	18106	21571	22911	17980	18993	15985	17835	12247	16664	17544	16637	14963	16752	16949	14768	16410	18614	19223	13722	15298
58	Pyruvate oxime	102.02	1	3529.55	0.7009	C02193; C11822; C20249	C3H5NO3	-H(-)	100	58	102.02	MVGBKLTYYAYYGY-RQOWECAXSA-N	Organic nitrogen compounds	757	605	576	822	1443	1874	2102	1491	1657	1451	1341	1679	1599	1374	1509	1594	1279	1435	1514	1330	1360	1246	1502	1020	1510	1328	1268	1835	2554	1473	1812	1532	1440	1209	1871	1773
59	Aminobutanoic acid (ABA)	102.056	1	353047	-0.0961175	C00334; C01026; C01205; C02261; C02356; C02721; C03284; C03665; C05145; C11109; C11735; C19514	C4H9NO2	-H(-)	100	59	102.056	BTCSSZJGUNDROE-UHFFFAOYSA-N	Amino acids, peptides, and analogues	8063	6017	6090	6064	47973	57388	50305	51269	59730	57095	49339	54573	50426	50896	57325	52282	60559	53232	69635	47283	54489	61576	56026	44469	62743	67347	57387	63114	63893	69452	72132	61891	72880	68865	57216	63822
60	Hydroxybutanoic acid	103.04	1	13829.6	0.730094	C00989; C01089; C01188; C01991; C03197; C05984; C06001; C14601	C4H8O3	-H(-)	100	60	103.04	SJZRECIVHVDYJC-UHFFFAOYSA-N	Lipids and lipid-like molecules	11159	8414	8684	19334	4559	7213	5511	7209	4131	3265	7755	6121	6744	7159	4646	4574	8153	4048	6682	4272	6646	6757	5949	5532	3749	6139	4416	7141	3944	5866	5060	4432	4746	6297	5095	3667
61	Serine	104.035	1	84465.6	0.7274	C00065; C00716; C00740	C3H7NO3	-H(-)	100	61	104.035	MTCFGRXMJLQNBG-REOHCLBHSA-N	Amino acids, peptides, and analogues	820	1095	505	565	17811	22422	10492	12704	14011	15868	33157	13857	13115	14129	15751	14375	15307	12279	15625	11409	13840	14726	13208	9827	15036	17222	13267	15278	15448	25706	20196	21575	25217	20794	17617	20812
62	Diethanolamine	104.072	1	1283.44	0.726983	C06772; C11260	C4H11NO2	-H(-)	100	62	104.072	ZBCBWPMODOFKDW-UHFFFAOYSA-N	Organic nitrogen compounds	357	171	301	164	427	466	272	289	354	404	588	317	295	322	325	323	353	380	307	279	330	346	300	208	294	356	325	326	352	538	421	424	516	449	329	373
63	Chloroacrylic acid	104.974	1	461.686	0.582	C06614; C06615; C20609	C3H3ClO2	-H(-)	25	63	104.974	MHMUCYJKZUZMNJ-OWOJBTEDSA-N	Organic acids and derivatives	337	398	173	373	241	506	350	310	325	336	417	226	244	285	246	199	342	293	321	319	317	234	211	172	420	230	277	371	217	224	202	290	390	294	291	342
64	D-Glyceric acid	105.019	1	63867.2	0.571452	C00258	C3H6O4	-H(-)	100	64	105.019	RBNPOMFGQQGHHO-UWTATZPHSA-N	Carbohydrates and carbohydrate conjugates	702	1537	665	1593	10782	13118	9540	10160	11758	11797	9111	9173	10540	11581	11893	12189	12981	10223	13426	9151	10040	9820	10268	9046	9842	10699	9469	9299	9119	8984	9699	10309	10731	8555	14433	13880
65	Nitrosobenzene	106.03	1	1944.61	0.591841	C06876; C07327; C17500	C6H5NO	-H(-)	100	65	106.03	NLRKCXQQSUWLCH-UHFFFAOYSA-N	Benzenoids	624	740	609	710	776	945	791	922	891	912	1070	933	889	858	1171	955	1238	843	853	855	816	1044	830	879	911	793	770	868	828	908	949	668	857	954	910	1039
66	Chloropropanoic acid	106.99	1	1549.74	0.71843	C20608	C3H5ClO2	-H(-)	25	66	106.99	GAWAYYRQGQZKCR-REOHCLBHSA-N	Organic acids and derivatives	1007	963	1128	1079	955	1014	760	754	832	864	709	817	869	960	676	850	1038	958	724	689	920	1208	934	772	1064	872	805	998	1060	750	696	582	761	777	554	1026
67	Benzoquinone	107.014	1	2305.29	0.647762	C00472; C02351	C6H4O2	-H(-)	100	67	107.014	AZQWKYJCGOJGHM-UHFFFAOYSA-N	Carbonyl compounds	503	924	715	1027	1108	1396	1071	1263	1547	1298	1128	1079	960	1175	1193	967	1164	1024	1453	1383	1488	1306	1368	1093	1391	1002	963	1374	1155	887	1015	755	1044	933	1042	998
68	Benzosemiquinone	108.022	1	28152.7	-0.0740058	C02389; C05060	C6H5O2	-H(-)	100	68	108.022	XLHUBROMZOAQMV-UHFFFAOYSA-N	Benzenoids	6378	12301	6497	13876	14929	15892	15255	15754	17041	16652	18093	15468	16204	16427	16073	16024	17406	14807	17485	16470	14175	15566	14997	13288	16028	17443	15230	17028	15286	15854	14400	14439	16541	16350	17101	17273
69	Aminophenol	108.046	1	44866.6	-0.208343	C01987; C02372; C02720; C05058	C6H7NO	-H(-)	100	69	108.046	CDAWCLOXVUBKRW-UHFFFAOYSA-N	Benzenoids	34081	32985	32545	34424	39373	43181	34102	39511	39061	36715	37462	34068	35184	35917	39040	33762	39678	34794	39936	33995	35485	39973	32744	33734	37096	37845	38096	37273	39882	36873	35874	36835	37136	35295	35067	38026
70	Formylphosphonic acid	108.97	1	1016.1	0.789737	C17943	CH3O4P	-H(-)	100	70	108.97	DEBRGDVXKPMWQZ-UHFFFAOYSA-N	Organic acids and derivatives	406	158	535	49	797	920	692	1104	628	1135	552	715	786	862	751	864	683	704	989	731	625	867	976	629	450	832	590	500	402	633	356	586	670	371	497	795
71	Catechol	109.03	1	39150.2	0.398366	C00090; C00530; C01751; C01785; C11115; C15571	C6H6O2	-H(-)	100	71	109.03	YCIMNLLNPGFGHC-UHFFFAOYSA-N	Benzenoids	11344	13507	11145	14499	17968	19053	18249	17619	19380	19098	19145	18266	19796	19020	19237	19116	22225	17861	20455	18184	19011	17140	18119	15669	19342	18183	16841	18281	17866	17770	16159	15666	16165	16038	17882	19657
72	N-Acetylimidazole	109.041	1	64763.5	0.412723	C02560; C05130	C5H6N2O	-H(-)	100	72	109.041	VIHYIVKEECZGOU-UHFFFAOYSA-N	Organoheterocyclic compounds	4027	4357	4052	4317	21261	16497	17320	20666	23624	19334	20495	18020	19602	19052	22696	21695	19301	21432	23419	19468	19709	17243	19245	13289	17423	18962	17202	16721	17634	17457	14971	17731	18794	20671	14839	16287
73	2,5-Dihydroxypyridine	110.025	1	26733.3	0.0928087	C01059; C02932; C03056; C03927; C05942	C5H5NO2	-H(-)	100	73	110.025	CHGPEDOMXOLANF-UHFFFAOYSA-N	Organoheterocyclic compounds	8331	10035	8236	12287	17865	17214	15033	16507	19399	14622	17488	15887	13965	14024	17271	14620	18162	14686	16370	13046	15886	17271	14806	14038	17076	16446	16255	15855	16841	16579	15170	15365	15996	18918	16242	16691
74	Cytosine	110.037	1	8859.98	0.112889	C00380	C4H5N3O	-H(-)	79	74	110.037	OPTASPLRGRRNAP-UHFFFAOYSA-N	Organoheterocyclic compounds	3517	3777	3513	5057	7305	5396	5892	5598	6849	5257	5827	5092	4808	4294	6281	5031	5883	4591	5886	4898	4716	5233	4877	4657	5934	5188	5333	5712	5553	5100	4244	4943	5749	6327	5183	5544
75	Monomethyl sulfate	110.976	1	11667.1	0.937383	C02704	CH4O4S	-H(-)	100	75	110.976	JZMJDSHXVKJFKW-UHFFFAOYSA-N	Organic acids and derivatives	1890	1994	2070	2693	1510	1856	1231	1589	1783	1400	2001	1292	1182	1227	1098	1066	1810	1300	1667	789	977	1091	906	1506	2003	1546	1512	1955	1807	1775	1637	1517	1749	2125	941	1822
76	Hydroxymethylphosphonate	110.985	1	9272.94	0.945073	C06455	CH5O4P	-H(-)	100	76	110.986	GTTBQSNGUYHPNK-UHFFFAOYSA-N	Organic acids and derivatives	183	408	195	687	1504	1852	1441	1361	1694	1173	1535	1111	939	1008	1254	929	1241	992	1674	755	981	1277	903	1128	1165	1170	1215	1364	1257	1485	1111	1211	1469	1542	1142	1104
77	Furoic acid	111.009	1	116111	0.246873	C01546	C5H4O3	-H(-)	100	77	111.009	SMNDYUVBFMFKNZ-UHFFFAOYSA-N	Organoheterocyclic compounds	9092	36364	8586	45060	33191	32662	30949	34261	35283	27517	30646	27121	25953	30687	31201	26816	34942	28218	37234	20984	28638	33468	26075	24634	26537	29606	24225	27693	27574	27060	26897	25470	25352	25370	27919	30689
78	Uracil	111.02	1	52368.5	0.442536	C00106; C18474	C4H4N2O2	-H(-)	100	78	111.02	ISAKRJDGNUQOIC-UHFFFAOYSA-N	Organoheterocyclic compounds	5711	13616	5199	16327	17050	19734	18404	18401	23269	16316	19982	15309	16847	18122	18437	15516	22821	17276	21695	12548	16871	19624	16027	19014	21762	23721	26354	23688	24764	21565	25520	25109	26458	23821	12514	15531
79	C6:2	111.046	1	29638.1	0.440009	C01066; C04091; C04221; C06105; C08063; C08502	C6H8O2	-H(-)	100	79	111.046	HJSLFCCWAKVHIW-UHFFFAOYSA-N	Carbonyl compounds	15807	15887	16306	17889	19256	20824	15655	16143	18282	16010	26034	14748	17279	16575	16045	14924	18512	15987	18145	15584	14918	16508	14773	14354	16320	17790	15185	16734	15971	15449	15573	14917	15813	14635	14183	17344
80	2-Nitrofuran	112.005	1	5677.13	0.372816	C14414	C4H3NO3	-H(-)	100	80	112.005	FUBFWTUFPGFHOJ-UHFFFAOYSA-N	Organoheterocyclic compounds	2825	2282	2011	2252	2734	2747	2752	3234	3023	2694	2642	2594	2921	2304	3356	2672	3354	2305	3162	2606	2964	3013	2509	2249	3161	2660	2760	4020	3037	2662	3411	2604	3004	3279	2537	2887
81	Pyrroline carboxylic acid	112.04	1	24241.6	-0.0236763	C03564; C03912; C04322; C07275	C5H7NO2	-H(-)	100	81	112.04	RHTAIKJZSXNELN-UHFFFAOYSA-N	Organoheterocyclic compounds	12242	11196	10630	12022	17114	18122	14467	16139	17458	15875	16160	16721	15876	15444	17131	15510	17974	14147	16289	15224	15223	17361	13841	14937	15895	15670	15427	16187	16322	16341	16940	15213	15623	16616	16663	17573
82	Creatinine	112.051	1	6676.77	0.47983	C00791; C19280	C4H7N3O	-H(-)	100	82	112.051	DDRJAANPRJIHGJ-UHFFFAOYSA-N	Amino acids, peptides, and analogues	3757	6461	4964	4816	5280	5625	5013	4123	5825	5475	5789	5483	4261	4785	6132	4134	5563	4023	4639	3767	4192	5962	4416	4567	4691	3882	4873	4541	5113	5102	5305	5365	4207	4609	4250	5484
83	2-Hydroxy-2,4-pentadienoic acid	113.025	1	71327.1	0.677515	C00596; C07091	C5H6O3	-H(-)	100	83	113.025	VHTQQDXPNUTMNB-ONEGZZNKSA-N	Lipids and lipid-like molecules	3364	6266	3117	7059	22373	22741	46885	22135	25253	24091	23082	19553	20058	19376	22031	20786	24709	20942	25283	19071	19323	21302	18521	17036	19922	19859	19409	20365	19595	22212	18465	19278	21109	20902	21009	20789
84	Dihydrouracil	113.036	1	204740	0.460373	C00429; C02512; C02565; C02777; C08311	C4H6N2O2	-H(-)	100	84	113.036	OIVLITBTBDPEFK-UHFFFAOYSA-N	Organoheterocyclic compounds	3415	3670	2863	3676	54667	46000	53940	51878	60323	52998	57381	53353	48295	47950	52864	50293	48838	53209	62642	43803	48722	48024	46279	38898	63099	68392	55409	54837	65732	91036	74729	83323	84976	104227	32255	40924
85	2-Hydroxycyclohexan-1-one	113.061	1	22432.4	0.0177807	C01147; C01880; C03228	C6H10O2	-H(-)	100	85	113.061	ODZTXUXIYGJLMC-UHFFFAOYSA-N	Alcohols and polyols	11789	12783	9918	13869	15523	15421	16175	17136	16875	15443	16922	13894	15308	14457	14976	14638	15521	15160	15473	14069	14546	15659	13494	13505	16033	16981	13040	18277	15966	19056	15582	16674	15428	17472	15550	14977
86	Nitrosopiperidine	113.072	1	10214.2	0.613476	C19284; C19781	C5H10N2O	-H(-)	100	86	113.072	UWSDONTXWQOZFN-UHFFFAOYSA-N	Organoheterocyclic compounds	3439	3005	2598	2963	5870	5586	7247	5771	5876	5752	6531	5099	5661	5100	5225	6511	4799	5505	5503	4559	5266	5229	4792	5483	6228	6240	5424	6248	5442	6944	6471	6968	6755	7908	4446	5336
87	Maleamic acid	114.02	1	99543.8	0.639894	C01596	C4H5NO3	-H(-)	100	87	114.02	FSQQTNAZHBEJLS-UPHRSURJSA-N	Lipids and lipid-like molecules	594	550	650	530	12679	10087	11248	12501	13874	13246	14360	15521	13071	13201	12882	12631	16184	15460	17563	11678	12574	12839	11399	10816	17929	17663	15019	13515	17982	20597	15296	15631	17295	22536	8525	12364
88	Proline	114.056	1	705932	0.248289	C00148; C00763; C16435; C18170	C5H9NO2	-H(-)	100	88	114.056	ONIBWKKTOPOVIA-BYPYZUCNSA-N	Amino acids, peptides, and analogues	14024	18425	12970	15635	113782	268757	86277	93492	104983	97015	124622	93300	98531	102381	97714	92834	108974	96389	120870	88717	87201	107452	86730	72984	84518	99084	82334	87438	92580	153445	98569	88752	98946	86493	94897	98116
89	Fumarate	115.004	1	232815	0.233409	C00122; C01384; C02150	C4H4O4	-H(-)	100	89	115.004	VZCYOOQTPOCHFL-OWOJBTEDSA-N	Organic acids and derivatives	16078	7558	15216	9396	49171	51900	46973	56078	58764	55223	43554	52825	55002	56298	56242	53445	65640	51220	75861	39087	50704	58410	45623	44489	43268	52825	44796	42027	44970	45579	48280	47284	52321	42163	47090	59388
90	Ketovaline	115.04	1	39683.7	0.587446	C00141; C02233; C03273; C06255	C5H8O3	-H(-)	100	90	115.04	QHKABHOOEWYVLI-UHFFFAOYSA-N	Organic acids and derivatives	17241	19872	18118	23066	22533	25749	26132	21164	23357	19807	26748	22986	25313	32920	25504	23625	24837	28718	25680	16714	19716	21319	16183	16666	37918	27855	20406	34595	30565	24631	25770	22982	27078	22479	26147	26944
91	Nitroacrylic acid	115.999	1	3715.87	0.516417	C02231	C3H3NO4	-H(-)	100	91	115.999	MBNRADMGBBUWJK-OWOJBTEDSA-N	Organic acids and derivatives	325	397	460	560	1150	1169	917	1113	986	957	1115	963	1099	1238	1177	849	1114	1004	1439	881	913	1088	868	1015	842	1075	903	838	1110	1220	772	990	1092	1127	1428	1445
92	Valine; Betaine	116.072	1	685393	0.50588	C00183; C00431; C00719; C01799; C01826; C03571; C06417; C07457; C15987; C16436	C5H11NO2	-H(-)	100	92	116.072	KZSNJWFQEVHDMF-BYPYZUCNSA-N	Amino acids, peptides, and analogues	9906	29107	7546	19683	83607	94736	85353	90616	104471	90160	96245	90027	94371	93285	86871	83359	90499	85356	98890	67826	84574	94843	83185	78318	144866	161022	152235	151508	167641	234477	186780	191936	214133	244823	67423	84571
93	Succinate	117.019	1	82090.6	0.852478	C00042; C02170; C10900	C4H6O4	-H(-)	100	93	117.019	KDYFGRWQOYBRFD-UHFFFAOYSA-N	Organic acids and derivatives	8233	11442	7212	15068	52698	34764	46067	47681	52804	51967	36836	44495	46142	51333	61256	65254	59031	57172	85278	37967	60018	45957	45175	37906	25987	33663	27099	28121	28971	24228	24389	26366	27317	21226	37874	40549
94	Benzofuran	117.035	1	45763.6	0.845616	C14512	C8H6O	-H(-)	100	94	117.034	IANQTJSKSUMEQM-UHFFFAOYSA-N	Organoheterocyclic compounds	320	1440	252	1579	7265	6745	8657	9225	9463	8708	7620	8006	8901	10152	10232	9750	9768	9847	11948	7351	8173	10154	8468	7414	6696	7428	7696	6678	6482	7835	8633	8914	8092	8022	8397	8403
95	Threonine	118.051	1	308424	0.386267	C00188; C00263; C00820; C02115; C03678; C05519; C11108; C12317	C4H9NO3	-H(-)	100	95	118.051	AYFVYJQAPQTCCC-GBXIJSLDSA-N	Amino acids, peptides, and analogues	3474	5333	3174	4136	42526	46298	35771	40414	46577	41292	45903	39435	40933	45685	38681	38308	38619	37468	49588	34956	37005	45107	36397	29509	41707	49420	42667	45626	47189	61398	45427	53919	55413	54836	32870	36475
96	Tetrose	119.035	1	41418	0.571445	C01796; C02022; C02045; C06463	C4H8O4	-H(-)	100	96	119.035	FMAORJIQYMIRHF-HERZVMAMSA-N	Carbohydrates and carbohydrate conjugates	1653	3618	1887	4212	15986	15049	41250	14291	15927	15683	16697	13886	14357	15229	15390	14704	16062	14360	16666	12179	13894	14824	12401	11925	15606	15381	14783	15884	15089	15841	14871	15466	16498	18316	14305	15035
97	Cys	120.012	1	32410.8	0.59065	C00097; C00736; C00793	C3H7NO2S	-H(-)	100	97	120.012	XUJNEKJLAYXESH-REOHCLBHSA-N	Amino acids, peptides, and analogues	385	1305	527	1272	5530	6692	5870	6146	5644	4547	8386	6148	6334	5860	7485	5617	5902	6319	7064	5781	5546	5650	5466	4288	5442	6306	5502	5961	5290	6889	5643	5016	7800	6217	5672	4915
98	Benzamide	120.046	1	19839.2	0.0661122	C09815	C7H7NO	-H(-)	100	98	120.046	KXDAEFPNCMNJSK-UHFFFAOYSA-N	Benzenoids	10116	10424	9831	10586	11549	12076	12007	11908	12058	10419	12795	11682	11213	11918	12617	13571	13091	10676	12604	10412	11026	12683	11744	11723	13832	12406	11250	12545	12955	11447	12204	11908	12064	11994	12795	13205
99	Tromethamine	120.067	1	4514.55	0.697141	C07182	C4H11NO3	-H(-)	100	99	120.067	LENZDBCJOHFCAS-UHFFFAOYSA-N	Organic nitrogen compounds	2129	2401	2534	2558	2504	2661	2823	2832	3227	2529	2640	3170	3361	3599	3240	3690	2887	3552	3832	2116	2617	2663	2948	2510	4778	3332	2595	3823	3957	3367	3423	3234	2961	3337	2951	3516
100	3-Mercaptolactate	120.996	1	147927	0.789619	C05823; C19296	C3H6O3S	-H(-)	100	100	120.996	OLQOVQTWRIJPRE-REOHCLBHSA-N	Carbohydrates and carbohydrate conjugates	21135	26287	17386	31876	54678	59305	57098	59996	67579	58967	77378	54953	60641	53125	64301	57704	68856	58763	64150	46627	54056	62281	44986	43700	49510	55148	53897	46687	58102	60036	49099	49593	61372	54018	57184	51988
101	Benzoate	121.03	1	231030	0.510755	C00180; C00539; C00633; C03067; C06202; C15474	C7H6O2	-H(-)	100	101	121.03	WPYMKLBDIGXBTP-UHFFFAOYSA-N	Benzenoids	37306	28573	37398	29632	109245	111505	136797	138400	148386	147159	114591	151229	140626	141390	151092	153048	146027	152311	180441	107852	133763	167849	146826	113484	116566	125906	128391	105349	117157	128031	136095	137523	141548	138476	133336	136747
102	Phenylethyl alcohol	121.066	1	29816.3	0.0821064	C05853; C06757; C07112; C07213; C07216; C11348; C13637; C14385; C14386; C14582	C8H10O	-H(-)	100	102	121.066	WRMNZCZEMHIOCP-UHFFFAOYSA-N	Benzenoids	14118	9338	12948	10277	12729	12396	12504	14162	14443	12757	11906	12389	12994	12665	13354	13074	13464	13468	13649	11089	13869	13933	12343	11954	12965	12683	12452	13492	13352	14323	14760	13582	14391	14321	13290	12541
103	Nicotinate	122.025	1	31860.8	0.242023	C00253; C06813; C07446; C10164	C6H5NO2	-H(-)	100	103	122.025	PVNIIMVLHYAWGP-UHFFFAOYSA-N	Organoheterocyclic compounds	7588	9657	8116	10644	18346	18453	16599	16410	18995	17287	16953	18174	19152	18315	16374	16272	18592	15043	17837	14803	17140	18176	15884	13619	17099	18819	16226	17608	18193	18569	17587	16605	17176	17354	18060	21977
104	Orcinol	123.045	1	46690	0.487737	C00727; C01502; C02323; C02923; C03351; C06730; C15572; C17467	C7H8O2	-H(-)	100	104	123.045	OIPPWFOQEKKFEE-UHFFFAOYSA-N	Benzenoids	13212	19475	14238	20859	18941	18866	18774	19008	19617	19485	21099	19585	19294	21175	19315	19181	19151	18222	21592	17346	18153	19408	17664	19785	18239	19272	17123	18791	18181	20172	18201	18064	17535	18889	18743	17458
105	Taurine	124.007	1	11751.2	0.243352	C00245	C2H7NO3S	-H(-)	100	105	124.007	XOAAWQZATWQOTB-UHFFFAOYSA-N	Organic acids and derivatives	5254	7759	5278	5943	11890	8731	10335	11587	11263	9164	10351	8763	8804	9974	11392	9044	13111	10700	10711	7963	11978	9519	9464	6394	11788	8440	7045	11921	10405	8310	10050	8531	12907	8300	10505	11516
106	2-Aminoethylphosphonate	124.017	1	10507.2	0.732061	C03557; C03782	C2H8NO3P	-H(-)	100	106	124.016	QQVDJLLNRSOCEL-UHFFFAOYSA-N	Organic acids and derivatives	2019	2856	1960	3112	5312	5660	4931	5457	5970	5265	6057	5569	4906	6186	6832	5022	6447	6102	6426	4786	5459	5582	4918	4480	5518	4961	4634	6010	5228	5565	5044	5725	5166	4773	5414	5172
107	N-Ethylmaleimide	124.041	1	24889.4	-0.0225168	C02441; C02854; C14602; C14604; C16671; C18351	C6H7NO2	-H(-)	100	107	124.041	HDFGOPSGAURCEO-UHFFFAOYSA-N	Organoheterocyclic compounds	11954	13157	12790	13643	15245	14858	12846	15228	15147	14102	15047	14320	15004	14675	14601	14113	15377	13577	15615	13552	14274	14519	13933	12391	14852	15379	13703	14962	16013	15571	15161	13756	14564	15412	14794	15028
108	2-Hydroxyethylphosphonate	125.001	1	5308.4	0.849515	C06451	C2H7O4P	-H(-)	100	108	125.001	SEHJHHHUIGULEI-UHFFFAOYSA-N	Organic acids and derivatives	2003	2583	2142	2793	4160	3722	4151	4145	4095	3981	3703	3665	3524	2947	4153	3249	3230	3065	4188	3488	3518	3897	3111	2503	3242	3229	3273	3779	3389	3825	3568	3225	3739	3664	3050	3857
109	Pyrogallic acid	125.025	1	39464	0.306523	C01108; C02183; C02752; C02814; C11101; C11918; C20718	C6H6O3	-H(-)	100	109	125.025	WQGWDDDVZFFDIG-UHFFFAOYSA-N	Benzenoids	8705	9599	8671	10246	18744	18335	23325	17915	19333	17590	19646	16498	17614	17743	19266	19249	19763	17590	21764	17885	18025	17611	18121	15529	16412	17280	16166	15392	16109	17187	15025	15665	16170	14316	17769	17384
110	Thymine	125.036	1	22085	0.488845	C00178; C02835	C5H6N2O2	-H(-)	100	110	125.036	RWQNBRDOKXIBIV-UHFFFAOYSA-N	Organoheterocyclic compounds	5264	4961	4821	5879	10929	9234	9751	10077	9978	9052	9854	8722	9417	9774	10609	9532	9583	9114	10991	8787	8840	8748	8827	8154	8568	9516	8634	9052	9367	9519	9404	8999	8288	9052	8166	8589
111	Toluene-cis-dihydrodiol	125.061	1	25944.6	0.139709	C04592; C12101	C7H10O2	-H(-)	100	111	125.061	FTZZKLFGNQOODA-NKWVEPMBSA-N	Alcohols and polyols	14224	10655	14088	10608	13929	12279	12919	14947	13748	13098	13121	11920	11648	10703	12923	12103	10729	11873	14734	12050	11087	12702	12885	12941	11238	12448	10834	12233	12110	14626	12704	12723	14093	12784	12072	13700
112	Sulcatone	125.098	1	43273	-0.23131	C07287	C8H14O	-H(-)	100	112	125.098	UHEPJGULSIKKTP-UHFFFAOYSA-N	Carbonyl compounds	42596	46510	39752	46084	35160	33738	32463	40195	33551	30876	37738	34711	36313	33756	35343	30255	35125	32457	37337	31322	31968	34724	27174	39432	39751	34272	32547	35300	39623	36495	33802	34685	36194	36153	31737	33434
113	2,3,6-Trihydroxypyridine	126.02	1	13131.7	0.342031	C03458; C19721	C5H5NO3	-H(-)	100	113	126.02	YXJHZIOEJRCYHK-UHFFFAOYSA-N	Organoheterocyclic compounds	3018	3630	3615	4043	7562	6238	6013	7706	7221	6282	7245	6221	6131	6649	6472	6437	7731	6421	7450	6584	6711	6536	6617	5335	7105	7173	6513	7209	6933	7039	6104	6081	6912	6804	5655	6237
114	5-Amino-4-imidazole carboxylate	126.03	1	5904.8	0.649665	C05516; C16621	C4H5N3O2	-H(-)	100	114	126.03	PWCLNQLPYQVWAB-UHFFFAOYSA-N	Organoheterocyclic compounds	1872	2072	2180	1833	3511	2730	3128	3561	2866	2883	3592	2774	3440	3041	2635	3309	3691	2780	3848	2862	3148	3267	2891	2414	3300	3331	3074	3244	2608	3278	2688	2384	3555	2754	2901	3018
115	(S)-2,3,4,5-Tetrahydropyridine-2-carboxylate	126.056	1	20585.5	-0.0667797	C00450; C04092; C08268; C08292; C10149; C13694	C6H9NO2	-H(-)	100	115	126.056	CSDPVAKVEWETFG-YFKPBYRVSA-N	Amino acids, peptides, and analogues	10586	11137	10091	10416	14595	14990	13467	13826	15072	15483	15573	15100	15899	14997	15455	13743	17104	14811	17754	13071	15901	17553	14020	12222	15109	16735	14713	15128	15659	13809	15569	14236	15531	16621	13820	17262
116	N-Cyclohexylformamide	126.093	1	7001.09	-0.446366	C11519	C7H13NO	-H(-)	100	116	126.093	SWGXDLRCJNEEGZ-UHFFFAOYSA-N	Organic acids and derivatives	5916	6429	7682	6838	5858	6028	5636	6245	6847	5952	6037	5240	6882	6890	5270	6162	5753	6031	6285	4838	7298	4973	4593	6286	5041	7345	7138	5423	6720	6071	6914	5784	6154	6053	5917	6136
117	Thiouracil	126.996	1	4743.7	0.723233	C19304	C4H4N2OS	-H(-)	39	117	126.996	ZEMGGZBWXRYJHK-UHFFFAOYSA-N	Organoheterocyclic compounds	1276	1396	1473	1254	2504	2317	2278	2704	3199	2499	2696	2006	2700	2473	2646	2546	2828	2321	3260	2180	2307	2594	2381	2161	2476	2815	2372	2812	2208	2500	2206	2368	2618	2207	2052	2312
118	Barbiturate	127.016	1	7037.96	0.600658	C00813	C4H4N2O3	-H(-)	72	118	127.016	HNYOPLTXPVRDBG-UHFFFAOYSA-N	Organoheterocyclic compounds	2044	1699	2286	2143	4492	3384	3405	4328	4687	3896	4701	3812	3826	3680	4007	3918	4713	4504	4501	3657	3894	3951	3608	2886	3868	4022	3667	3878	3876	3870	3546	3449	3915	4063	3571	3648
119	Dihydrothymine	127.051	1	452701	0.690141	C00906; C05715; C05717	C5H8N2O2	-H(-)	100	119	127.051	NBAKTGXDIBVZOO-UHFFFAOYSA-N	Organoheterocyclic compounds	875	1115	756	1518	65269	41133	49489	61620	67457	57974	57210	52915	56691	56594	67269	61843	52025	63926	71925	55350	56247	48796	54948	37392	45596	52434	47448	44385	47422	49660	39985	51205	51502	57238	36953	42149
120	Ethyl tiglate	127.077	1	57908.7	-0.129446	C08487; C09822; C10921; C10976; C11950; C13714; C13717	C7H12O2	-H(-)	100	120	127.077	OAPHLAAOJMTMLY-GQCTYLIASA-N	Lipids and lipid-like molecules	15696	16671	15145	17953	28605	28133	21158	33576	38596	29105	34209	29272	29345	27464	37842	33987	31235	27072	36026	29000	25093	26110	28351	21638	29085	28211	27947	25187	29158	25695	20990	25511	30219	29339	18710	27113
121	Oxoproline	128.036	1	1.33994e+06	0.564861	C01877; C01879; C02237; C04281; C04282	C5H7NO3	-H(-)	100	121	128.036	HFXAFXVXPMUQCQ-BYPYZUCNSA-N	Amino acids, peptides, and analogues	89241	208509	75354	127132	740741	617552	645743	746097	812732	673663	725795	633035	714402	753501	681514	691578	612316	671724	736392	561489	632742	621118	604390	533168	700849	741756	681849	653879	685565	748588	643010	684489	716843	823539	599081	658578
122	N-Methylhexanamide	128.108	1	4667.15	0.922574	C02722	C7H15NO	-H(-)	100	122	128.108	RSPBQSYWXAROOO-UHFFFAOYSA-N	Lipids and lipid-like molecules	209	364	231	349	2037	1646	1728	1935	2134	2042	1807	2055	2175	2285	2109	1969	2181	2024	2097	1601	1869	1947	1771	1478	2172	1999	1719	2326	2028	1921	2156	2030	2197	2423	1923	2144
123	Itaconate	129.019	1	73835.7	0.598663	C00433; C00490; C01732; C02132; C02214; C02226; C02800	C5H6O4	-H(-)	100	123	129.019	VHKNBDIQDAXGBL-UHFFFAOYSA-N	Organic acids and derivatives	1895	3482	1603	4184	21704	22674	22801	24185	24708	20743	20689	19444	15177	16619	20784	19747	19832	17056	25003	12596	17769	26825	18232	17424	19028	17653	16895	17919	17222	22453	20984	20192	21061	20519	21422	21370
124	4-Methyl-2-oxopentanoate	129.056	1	66185.6	0.802777	C00233; C00671; C00902; C01012; C02122; C02129; C03241; C03465; C03467; C03500; C06008; C06102; C12314; C14530	C6H10O3	-H(-)	100	124	129.056	BKAJNAXTPSGJCU-UHFFFAOYSA-N	Organic acids and derivatives	43016	47158	40040	49548	61718	63645	39112	48933	49537	45738	75823	41081	51354	45319	44710	40205	45102	38603	47342	39297	42638	43750	35033	40122	48082	49454	41805	46789	45389	46835	44737	41054	41966	47055	34882	43513
125	Cucurbitine	129.068	1	14457.6	0.785484	C10140; C19780; C19783	C5H10N2O2	-H(-)	100	125	129.068	DWAKXSZUASEUHH-RXMQYKEDSA-N	Amino acids, peptides, and analogues	7126	8489	6535	8842	11054	11415	9155	10279	11093	9271	12422	8963	10284	10166	10592	10069	9008	9219	11001	7434	9351	9186	8282	8205	10753	10377	8402	10229	10142	9513	9474	8432	9930	9650	9346	9410
126	N-Acetylputrescine	129.103	1	15403.5	0.109527	C02714; C19279	C6H14N2O	-H(-)	100	126	129.103	KLZGKIDSEJWEDW-UHFFFAOYSA-N	Organic acids and derivatives	13853	11679	14880	11419	16869	14867	12013	13868	14018	12358	15062	12911	12166	13638	13179	12346	12872	11776	14227	11399	13089	13453	10333	10999	16679	13989	12371	13959	14008	16587	15055	15341	15392	15582	11477	14329
127	2-Oxosuccinamate	130.015	1	8170.07	0.80779	C02362; C05840; C13058	C4H5NO4	-H(-)	100	127	130.015	ONGPAWNLFDCRJE-UHFFFAOYSA-N	Organic acids and derivatives	1168	1587	695	1401	2519	2861	2430	2986	2274	2243	2663	2313	2111	1906	2450	2389	2555	2102	2774	1774	2261	2418	1662	1454	2534	2818	2485	2080	3062	2384	2425	2492	2260	3175	2477	2413
128	5-Aminolevulinic acid	130.051	1	461818	0.157854	C00430; C01015; C01073; C01110; C01157; C01165; C03341; C03440; C03651; C03741; C05147; C19706	C5H9NO3	-H(-)	100	128	130.051	ZGXJTSGNIOSYLO-UHFFFAOYSA-N	Amino acids, peptides, and analogues	14601	22064	13323	18191	43398	42754	37134	43887	45384	40870	46593	40072	43343	40569	45157	40885	46705	39368	48209	34313	40510	40525	35040	36429	43811	44230	39361	39106	42427	45144	39568	43891	42014	42134	36059	43829
129	(Iso)Leucine	130.088	1	1.48944e+06	0.636218	C00123; C00407; C01570; C01933; C02378; C02486; C06418; C08263; C16434; C16439; C16647	C6H13NO2	-H(-)	100	129	130.088	ROHFNLRQFUQHCH-YFKPBYRVSA-N	Amino acids, peptides, and analogues	38257	152488	30850	93623	216255	300977	255927	291185	311806	270611	294829	313902	333858	307616	257085	224306	327965	245632	265215	198414	261748	323935	226350	243855	735933	771368	745945	694997	756679	1142253	879267	833542	899043	1119070	183032	260828
130	N-Carbamoylputrescine	130.099	1	455118	0.963746	C00436; C17146	C5H13N3O	-H(-)	100	130	130.099	YANFYYGANIYHGI-UHFFFAOYSA-N	Organic acids and derivatives	6826	26608	7170	16654	34618	45076	40276	43459	47777	39657	43872	45991	50265	45373	39045	32529	48662	38800	39083	30593	42671	47984	32819	39330	99259	103413	98448	97383	103647	154470	115490	111420	119361	147639	28548	39621
131	Asparagine	131.046	1	426436	0.864194	C00152; C01043; C01905; C02037; C02642; C16438; C19258; C19301	C4H8N2O3	-H(-)	100	131	131.046	DCXYFEDJOCDNAF-REOHCLBHSA-N	Amino acids, peptides, and analogues	460	754	432	655	36397	29499	29068	32467	37831	34981	37984	33915	33063	34321	31755	32212	30110	33870	42065	28974	29907	33658	31058	26114	40325	45662	36400	36812	44232	68483	47955	58811	56952	71374	18053	24733
132	Ornithine	131.082	1	1.1069e+06	0.462096	C00077; C00515; C01602; C03943; C11320	C5H12N2O2	-H(-)	100	132	131.082	AHLPHDHHMVZTML-BYPYZUCNSA-N	Amino acids, peptides, and analogues	29118	9456	22702	7765	132622	100454	95668	76091	79791	78552	142354	84712	111047	87414	90566	86045	69725	86761	88531	80127	74022	73305	76554	78271	102768	104237	100095	112852	116747	159770	116599	154357	145969	167682	46242	65972
133	Aspartate	132.03	1	517053	0.804544	C00049; C00402; C16433; C19911	C4H7NO4	-H(-)	100	133	132.03	CKLJMWTZIZZHCS-REOHCLBHSA-N	Amino acids, peptides, and analogues	831	954	591	682	36955	29106	29578	29051	31550	34085	26576	28603	26222	32889	36338	38282	26488	26839	40985	31175	37844	31587	38288	20550	12143	14165	16829	17328	12593	13358	9776	13754	16264	11350	25419	20827
134	Malate	133.014	1	730085	0.0632406	C00149; C00497; C00711; C03064	C4H6O5	-H(-)	100	134	133.014	BJEPYKJPYRNKOW-REOHCLBHSA-N	Organic acids and derivatives	48259	28989	48465	36220	152285	154869	139206	155786	164105	162347	123882	144366	164596	162458	149516	146236	181221	140669	217087	107933	147241	166676	120989	127562	131470	163784	124327	124087	128458	156709	158002	158429	162701	134175	149548	179465
135	S,S-Dimethyl-beta-propiothetin	133.034	1	122428	0.303918	C04022	C5H10O2S	-H(-)	100	135	133.034	DFPOZTRSOAQFIK-UHFFFAOYSA-N	Organic acids and derivatives	4580	4824	4360	6000	23087	25225	22672	24473	27154	25487	21674	22553	25286	25488	24659	23935	28123	22642	32954	18933	22853	27066	20749	20096	20135	23959	20080	19500	20675	23744	23638	23556	24784	21414	23774	26954
136	1,2,6-Hexanetriol	133.087	1	15720.7	0.637525	C20334	C6H14O3	-H(-)	100	136	133.087	ZWVMLYRJXORSEP-UHFFFAOYSA-N	Lipids and lipid-like molecules	3128	2915	2900	3389	7300	6738	5251	5467	5372	5308	6617	5772	5131	5190	5684	5070	5143	6755	5725	5186	5382	5026	4601	3845	6324	5949	6419	5671	5954	7109	6827	6303	6304	7688	4882	5678
137	Proxan	134.994	1	6387.39	0.762102	C19127	C4H8OS2	-H(-)	100	137	134.994	UOJYYXATTMQQNA-UHFFFAOYSA-N	Organosulfur compounds	5103	7929	5142	7109	5017	5172	5662	5408	5072	5015	4836	5262	6710	7711	5337	5994	5464	6546	6670	4946	5453	5623	4245	4662	5142	4806	4029	5133	4642	4939	5452	4893	4638	5497	5097	5139
138	Threonate	135.03	1	156432	0.741252	C01620	C4H8O5	-H(-)	100	138	135.03	JPIJQSOTBSSVTP-STHAYSLISA-N	Carbohydrates and carbohydrate conjugates	3385	1254	3459	1307	25624	27531	27677	29565	31022	33683	27424	35584	50003	57400	38576	46608	22542	50673	44199	40027	41262	33544	42927	33029	18256	25615	15272	18438	25484	39904	37803	40062	36139	34501	43220	47151
139	Phenyl acetate	135.045	1	356502	0.71484	C00548; C01454; C03765; C05613; C06224; C07085; C07086; C07189; C07211; C07215; C10700; C10761; C14087; C15583; C20645	C8H8O2	-H(-)	100	139	135.045	IPBVNPXQWQGGJP-UHFFFAOYSA-N	Benzenoids	63999	88646	70345	96241	121218	144760	139556	139883	145697	124060	138894	143905	158018	193472	162001	168911	166052	175651	173915	120816	135820	147428	141089	118478	168248	157879	122814	154920	156924	148184	152417	140904	148594	135634	159416	160979
140	Sodium salicylate	136.016	1	29196.9	0.262971	C07587	C7H5O3.	-H(-)	100	140	136.016	ABBQHOQBGMUPJH-UHFFFAOYSA-M	Benzenoids	2387	12470	2302	11650	12137	14488	13529	15797	16360	13991	15428	14531	15646	16467	15405	14592	16170	14765	14795	15286	15020	17644	14438	14401	14469	16064	15932	14815	14814	16188	14892	14692	15637	15684	15649	15679
141	Anthranilate	136.041	1	40831.9	0.0963204	C00108; C00568; C01004; C14394; C19486; C19597	C7H7NO2	-H(-)	100	141	136.041	RWZYAGGXGHYGMB-UHFFFAOYSA-N	Benzenoids	8888	6814	8288	7212	15116	16250	13639	14654	15398	14186	16128	14143	13640	15342	14896	13684	13647	14902	17477	12629	13493	16337	15349	13092	13566	14305	13831	16095	15265	18433	17250	18017	16685	18770	14827	15585
142	Tyramine	136.077	1	26061.7	0.205649	C00483; C01183; C02735; C03473; C16570; C18396; C19216; C19376	C8H11NO	-H(-)	100	142	136.077	DZGWFCGJZKJUFP-UHFFFAOYSA-N	Benzenoids	13421	3548	12296	3459	12354	12118	12371	11113	12706	11895	13339	10172	10708	11559	11495	12321	11304	11840	13119	11455	11853	12058	11878	10806	11591	11293	10905	12081	12626	14186	13725	14724	14237	14285	10964	13091
143	4-Hydroxybenzoate	137.024	1	154961	0.751943	C00156; C00587; C00805; C05585; C10832; C16700; C18316	C7H6O3	-H(-)	100	143	137.024	FJKROLUGYXJWQN-UHFFFAOYSA-N	Benzenoids	17684	52598	16438	40715	69750	69783	62104	81305	81069	78329	89957	73706	78338	76842	82289	76223	87668	73085	83060	79100	71837	71914	74517	64244	70460	72561	72382	71663	63784	71058	66382	71367	68062	64696	75677	78413
144	Urocanate	137.036	1	321901	0.640672	C00785; C02126; C19345	C6H6N2O2	-H(-)	100	144	137.036	LOIYMIARKYCTBW-OWOJBTEDSA-N	Organoheterocyclic compounds	166477	698985	114077	159743	91838	79757	74858	121623	128703	89903	106208	77299	116934	101736	118453	80089	83861	162483	98249	95542	90753	100396	72894	77101	106284	110034	96417	174496	91975	105112	91233	163597	105743	95831	80118	165486
145	3-Methoxybenzyl alcohol	137.06	1	43572.9	0.497589	C03352; C06044; C06728; C07084; C11480; C13638; C20694	C8H10O2	-H(-)	100	145	137.06	IIGNZLVHOZEOPV-UHFFFAOYSA-N	Benzenoids	22736	35089	20370	18319	19323	19209	18416	19326	20088	17947	19356	17755	18773	18642	18246	19123	17328	19039	19083	18020	19364	19164	17339	18249	18744	18911	19653	19474	16456	19459	17205	19468	20018	19192	17367	20624
146	Isophorone	137.097	1	18214.3	0.798189	C14743; C16323	C9H14O	-H(-)	100	146	137.097	HJOVHMDZYOCNQW-UHFFFAOYSA-N	Carbonyl compounds	6587	4111	6527	4949	10920	10564	9971	10032	9516	9336	9460	8446	9256	9140	9691	8893	8041	8396	8710	8439	7777	8344	7258	7704	8944	9863	8964	8851	8804	9626	8318	8352	9152	8923	8697	8439
147	Methylarsonate	138.937	1	239254	0.31541	C07294	CH5AsO3	-H(-)	25	147	138.937	QYPPRTNMGCREIM-UHFFFAOYSA-N	Organometallic compounds	59236	57750	56996	91899	142000	158893	86122	116212	114646	109118	140302	109475	100315	97019	124856	105760	129673	106423	124863	105867	131155	117024	117554	135271	115475	107369	126534	120644	121755	122237	118378	106665	130368	117516	132216	138376
148	cis-4-Carboxymethylenebut-2-en-4-olide	139.003	1	41153.8	0.732437	C04431; C12838; C20449	C6H4O4	-H(-)	100	148	139.003	AYFXPGXAZMFWNH-ONEGZZNKSA-N	Organoheterocyclic compounds	37830	40689	40466	42756	27084	32072	28508	34832	32319	32849	32119	31951	37436	29892	32911	30516	34995	31976	36269	31698	29299	32186	30670	32356	31322	35634	30370	34044	33731	23657	28166	22251	27509	28291	26850	29193
149	Uracil 5-carbaldehyde	139.015	1	51664	0.67134	C17206	C5H4N2O3	-H(-)	100	149	139.015	OHAMXGZMZZWRCA-UHFFFAOYSA-N	Organoheterocyclic compounds	58395	68107	61874	86481	47160	49641	46237	51255	48293	48358	48554	44846	50942	51706	49131	47313	50731	31485	49957	47305	47462	47797	44428	46217	48778	50979	47188	47357	51647	47087	46613	44779	43208	43090	44447	45686
150	2,3,5-Trihydroxytoluene	139.04	1	48520.5	0.542663	C03338; C10792; C14110; C16401; C18317; C20362	C7H8O3	-H(-)	100	150	139.041	GIGNQZIJYUEWTI-UHFFFAOYSA-N	Benzenoids	29117	31876	29259	31560	35927	34780	35353	37510	36798	36792	40091	38031	39898	33827	39413	39833	46990	39084	42155	40809	42085	35359	39367	33765	39551	42787	37402	35117	36242	34525	31771	30712	35128	30951	36537	36421
151	Methylimidazoleacetic acid	139.051	1	22061.2	0.217639	C05828; C13693; C20522	C6H8N2O2	-H(-)	100	151	139.051	ZHCKPJGJQOPTLB-UHFFFAOYSA-N	Organoheterocyclic compounds	8430	12866	8602	12738	16809	16078	16450	17869	17345	16045	18667	16360	15853	16965	17041	16994	20277	16311	18283	16407	16952	18557	16618	14997	17655	16950	16671	16245	17384	16551	16380	16615	17272	16731	16595	17873
152	cis-1,2-Dihydro-3-ethylcatechol	139.076	1	25395.7	0.131231	C06727; C16656; C18011; C19311	C8H12O2	-H(-)	100	152	139.076	BACDCBUEYBFLFV-JGVFFNPUSA-N	Alcohols and polyols	11403	13824	13277	13291	15100	13567	12679	13672	13651	12984	14946	12250	12005	13702	14851	13026	12249	13981	14872	11557	13079	13705	11775	14054	13021	12940	12830	13968	13150	14778	14043	13196	13833	14449	12055	14064
153	Methamidophos	139.994	1	8249.05	0.419561	C18667	C2H8NO2PS	-H(-)	100	153	139.994	NNKVPIKMPCQWCG-UHFFFAOYSA-N	Organophosphorus compounds	4572	6643	4693	6542	8992	5604	4415	6410	7907	7511	9657	6697	6879	6139	6223	5087	6179	7184	6280	5150	5663	4755	3963	7067	8598	7454	6776	8763	7222	7317	5521	5986	8063	8547	4086	6073
154	2-Aminomuconate semialdehyde	140.036	1	32166.6	0.165179	C03824; C04226; C09960	C6H7NO3	-H(-)	100	154	140.036	QCGTZPZKJPTAEP-REDYYMJGSA-N	Amino acids, peptides, and analogues	16124	22526	15220	25116	28341	26532	24969	26986	26524	25307	26909	26283	26644	27389	26546	24660	28213	26389	27050	24074	21645	26088	23721	23380	27129	27589	27218	27356	26236	27887	26611	25863	27364	26864	25457	25306
155	Ethosuximide	140.072	1	10386.4	0.298678	C07505; C08287; C10128; C16821	C7H11NO2	-H(-)	100	155	140.072	HAPOVYFOVVWLRS-UHFFFAOYSA-N	Organoheterocyclic compounds	3572	3865	3825	3817	5668	4935	5795	5537	5920	5360	5484	5713	6192	6593	6143	5680	6495	6272	6395	6002	5908	5740	6008	5232	6781	7148	5612	5958	6948	6660	5769	6577	6631	6481	5217	5568
156	Histidinol	140.083	1	4381.57	0.316242	C00860	C6H11N3O	-H(-)	100	156	140.083	ZQISRDCJNBUVMM-YFKPBYRVSA-N	Organic nitrogen compounds	1033	1575	1123	1758	2479	2385	2439	2849	2558	2216	2345	2573	2620	2550	2493	2446	2643	2327	2244	2406	2528	2192	1960	2004	2433	2244	2227	2376	2450	2566	2039	2269	2722	2845	1983	2347
157	Thien-2-ylacetate	141.003	1	13479.7	0.689196	C02595	C6H6O2S	-H(-)	93	157	141.003	SMJRBWINMFUUDS-UHFFFAOYSA-N	Organoheterocyclic compounds	12266	16092	12069	18004	12273	12736	11931	13170	11844	11814	12283	11455	13102	12523	11655	12632	13245	11827	12840	10165	11266	11668	9958	11953	12777	12304	11351	12369	12179	11547	12697	10864	12536	11509	12053	12807
158	4-Oxocyclohexanecarboxylate	141.056	1	19527.7	0.446037	C03767	C7H10O3	-H(-)	100	158	141.056	OWLXUYGCLDGHJJ-UHFFFAOYSA-N	Carbonyl compounds	7498	10252	7595	11447	10649	11680	10751	11191	11351	11286	12030	10280	9986	10919	10708	9801	10803	9629	12390	9367	10156	11564	9774	10124	9903	9676	9394	9257	10500	10005	10242	10086	9674	8702	9778	10587
159	Ectoine	141.068	1	12290	0.564829	C06231	C6H10N2O2	-H(-)	100	159	141.068	WQXNXVUDBPYKBA-YFKPBYRVSA-N	Amino acids, peptides, and analogues	1606	3128	1841	3700	7262	6403	6304	7107	7257	6653	7605	6636	7514	7926	7337	6773	6725	6857	8008	6740	6959	8711	6579	5438	6225	6749	6828	6347	5631	7369	5497	7924	5967	6532	5842	5662
160	Cycloheptanecarboxylic acid	141.092	1	31122.4	-0.152891	C12104; C12297; C16648; C16653; C16654; C19318; C19757	C8H14O2	-H(-)	100	160	141.092	VZFUCHSFHOYXIS-UHFFFAOYSA-N	Organic acids and derivatives	22768	27028	23544	26143	24323	21638	22287	24845	22349	22317	23905	21494	24220	25151	25232	21351	22875	20801	24383	19791	22315	24640	19205	22556	23697	24479	22133	27205	24794	23247	23721	22355	24894	22905	19693	21228
161	2-Amino-5-chlorophenol	142.006	1	2644.13	0.707584	C20669	C6H6ClNO	-H(-)	25	161	142.006	FZCQMIRJCGWWCL-UHFFFAOYSA-N	Benzenoids	610	506	507	766	1362	1389	1417	1641	1613	1833	1559	1631	1474	1879	1651	1512	1859	1458	1668	1483	1664	1826	1825	1553	1260	1572	1135	1621	1215	1883	1475	2121	1636	1594	1189	1654
162	2-Hydroxymethylclavam	142.051	1	24594.1	0.297967	C17357	C6H9NO3	-H(-)	100	162	142.051	CRVXTEJTLQIKDI-XINAWCOVSA-N	Organoheterocyclic compounds	2512	4586	2196	4700	12923	12190	10993	10991	12942	12320	13608	12086	13456	14467	12626	10895	12018	11117	13437	11341	11139	11802	10684	11404	10828	12708	10445	10664	12234	12513	11808	11084	11366	11182	10897	12367
163	(-)-Hygroline	142.124	1	1750.23	0.781421	C10152; C10168; C19983	C8H17NO	-H(-)	100	163	142.124	CWMYODFAUAJKIV-HTQZYQBOSA-N	Organoheterocyclic compounds	953	1320	586	874	1172	1152	1470	1394	1298	1284	1246	1533	1339	1095	1092	1164	1299	1002	1145	1048	1078	1123	1013	849	1096	1223	1213	1121	1070	1272	1339	1136	1170	1236	1288	915
164	2,3-Dimethylmaleate	143.035	1	30490.6	0.539907	C00922; C01757; C02295; C02930; C19821; C19822; C19826	C6H8O4	-H(-)	100	164	143.035	CGBYBGVMDAPUIH-ARJAWSKDSA-N	Lipids and lipid-like molecules	3353	5162	2952	5722	12745	12946	32952	12566	13226	13050	14025	10574	11851	11137	12368	11594	12284	9852	14565	10954	11022	12331	10605	9962	10757	11264	9692	11964	10562	12738	9942	10385	12708	11029	11809	11821
165	2-Naphthol	143.05	1	23936.9	0.860046	C11713; C11714; C14786; C14787	C10H8O	-H(-)	100	165	143.05	JWAZRIHNYRIHIV-UHFFFAOYSA-N	Benzenoids	3205	4994	3322	6102	9473	9442	15213	9947	10793	9489	10980	8849	9489	8896	10211	9376	9497	9232	10636	8356	9034	10876	8933	9031	8807	9540	8376	9354	8487	10746	9480	9419	10750	10114	8618	9098
166	trans-4-Hydroxycyclohexanecarboxylate	143.07	1	46014.3	0.490677	C04404; C16590	C7H12O3	-H(-)	100	166	143.07	HCFRWBBJISAZNK-IZLXSQMJSA-N	Alcohols and polyols	25889	29971	26968	31696	37985	32275	32658	36641	38239	32799	32799	30909	32403	32587	33892	29733	33842	30089	36079	25404	28963	26443	26052	34990	33132	36341	27990	38944	34909	33177	31220	30903	31951	32525	29139	33657
167	Octanoic acid	143.108	1	216354	-0.464577	C06423; C07185	C8H16O2	-H(-)	100	167	143.108	WWZKQHOCKIZLMA-UHFFFAOYSA-N	Lipids and lipid-like molecules	209641	241040	203780	237441	201335	188226	173705	204489	206487	173126	202461	176367	207609	206928	192067	168255	207164	176570	194037	174003	188301	184105	165162	178700	213605	215211	187407	206540	218931	200493	196432	190706	197815	202824	180705	188946
168	2-Oxoglutaramate	144.031	1	15795.9	0.841959	C00940; C05572	C5H7NO4	-H(-)	100	168	144.031	COJBGNAUUSNXHX-UHFFFAOYSA-N	Organic acids and derivatives	1121	1286	890	1216	8812	5627	6544	9330	9275	7156	9101	7167	5892	5398	7636	5980	9756	5804	9397	6029	8080	8286	7019	7231	8937	6978	5765	8897	7847	8113	7471	8126	9045	7299	7619	8465
169	3-Methyleneoxindole	144.045	1	144775	0.0706885	C02796; C06324; C06338; C06343; C06415; C08493; C19434	C9H7NO	-H(-)	100	169	144.045	IGXUUWYVUGBMFT-UHFFFAOYSA-N	Organoheterocyclic compounds	14293	41533	13864	46129	95182	99656	66539	100141	103366	114841	115221	94113	80609	75656	81061	76728	109295	76840	102651	68379	86233	64469	78420	113035	114234	101070	105690	104761	105614	85594	80300	74331	90294	83299	100264	112626
170	ZAPA	145.009	1	18278.1	0.730812	C13695	C4H6N2O2S	-H(-)	100	170	145.009	QEYNZJBVNYDZKZ-UPHRSURJSA-N	Lipids and lipid-like molecules	278	385	292	416	3397	2194	3047	2719	3159	3022	3007	3355	4063	4282	3030	3008	3215	4178	3785	2484	4114	3513	2546	2166	2691	4195	2867	2824	3154	3116	3196	2499	2233	2735	2375	2562
171	Oxoglutarate	145.014	1	54755.9	0.851409	C00026; C03716; C05406; C06030; C06316	C5H6O5	-H(-)	100	171	145.014	KPGXRSRHYNQIFN-UHFFFAOYSA-N	Organic acids and derivatives	727	843	764	889	5785	4363	4394	5292	5968	5842	5772	7338	8980	8578	6534	7782	6732	6446	7493	5266	6627	7166	5514	4202	5985	9009	6228	6160	6627	5580	5153	4307	5429	5142	5782	5932
172	Coumarin	145.03	1	139662	0.876584	C05851	C9H6O2	-H(-)	100	172	145.03	ZYGHJZDHTFUPRJ-UHFFFAOYSA-N	Phenylpropanoids and polyketides	110	1505	104	1548	8192	8855	8351	9233	13317	8993	11296	8248	11068	12136	12996	8938	9603	10315	11040	10023	9782	10840	9614	7101	7280	8473	9588	7415	7575	8505	7680	8094	7418	8793	9004	8546
173	1(2H)-Phthalazinone	145.04	1	92041.3	0.361197	C14473	C8H6N2O	-H(-)	100	173	145.04	IJAPPYDYQCXOEF-UHFFFAOYSA-N	Organoheterocyclic compounds	1771	3990	1911	4014	26675	17365	21636	23516	26711	23310	23612	21035	24065	23768	26395	24769	21448	26792	29181	21699	21315	20641	22467	15619	19642	22742	19961	19417	20579	22073	16930	21736	21029	22353	16903	18176
174	Glutamine	145.062	1	2.46187e+06	0.859254	C00064; C00303; C00819; C05100; C16673	C5H10N2O3	-H(-)	100	174	145.062	ZDXPYRJPNDTMRX-VKHMYHEASA-N	Amino acids, peptides, and analogues	727	1234	657	1349	237033	156588	185536	221987	254781	214935	213762	191467	205518	206694	245271	247491	196671	236022	264177	206357	216423	180490	201087	136771	176213	192407	178299	162203	174987	181962	151535	188552	199545	207047	147743	162761
175	Lysine	145.098	1	687390	0.328225	C00047; C00739; C01142; C01186; C05161; C16440; C20277	C6H14N2O2	-H(-)	100	175	145.099	KDXKERNSBIXSRK-YFKPBYRVSA-N	Amino acids, peptides, and analogues	11057	19562	8192	21529	79136	52219	71563	67021	84108	64012	71683	61448	74467	66741	80422	72336	66074	64472	94585	59577	64364	56542	59424	59828	76813	79155	69392	70130	90363	91214	65560	81242	80769	98999	36254	52465
176	Indole-5,6-quinone	146.024	1	75534.4	0.339279	C05579; C11129	C8H5NO2	-H(-)	100	176	146.024	IGGVVGHJSQSLFO-UHFFFAOYSA-N	Organoheterocyclic compounds	5086	18454	5308	17968	31896	33422	33668	31437	35695	31512	34238	31959	33799	36129	32601	31055	33956	33879	39850	29215	30659	35929	30747	30285	34555	38927	32747	33544	36156	39926	35855	34057	35349	37939	34923	33437
177	Glutamate	146.046	1	917812	0.744768	C00025; C00217; C00302; C00979; C03618; C03790; C05574; C05938; C05941; C12269	C5H9NO4	-H(-)	100	177	146.046	WHUUTDBJXJRKMK-VKHMYHEASA-N	Amino acids, peptides, and analogues	452	716	345	516	42686	46281	42255	41260	47236	46850	41974	44576	44262	45769	46919	44674	45556	46733	65060	41111	46358	55411	46853	37166	47937	55983	46733	52015	48973	65075	61598	55489	56950	53761	46371	50703
178	5-Methylthiopentanaldoxime	146.065	1	242385	0.916435	C17245	C6H13NOS	-H(-)	100	178	146.065	KNFFJJFEYQLINT-FNORWQNLSA-N	Organic nitrogen compounds	223	331	161	375	26626	19545	21138	25261	28475	25162	24990	21813	23984	23123	28135	25367	23434	27077	32869	21916	22107	23211	22142	16716	21188	23485	22012	21204	22613	24017	20417	23314	23496	24841	17823	20346
179	Hydroxyglutarate	147.03	1	64460.4	0.766395	C00652; C00684; C00815; C01087; C01114; C02266; C02612; C02614; C02630; C02753; C02994; C03196; C03826; C05405; C06029; C06031; C06032	C5H8O5	-H(-)	100	179	147.03	CUOKHACJLGPRHD-JJYYJPOSSA-N	Carbohydrates and carbohydrate conjugates	5421	16957	5330	17495	34800	31570	29344	33821	34498	32956	31570	29643	28181	31018	33059	30813	31299	28379	37189	24526	29700	39169	28205	25511	26895	28124	24818	28284	24540	29680	29302	28349	30391	26138	35649	35618
180	Mevalonate	147.067	1	74035.4	0.795236	C00418; C00522; C02104; C03348; C04104; C06007; C06471	C6H12O4	-H(-)	100	180	147.067	KJTLQQUUPVSXIM-ZCFIWIBFSA-N	Lipids and lipid-like molecules	793	882	692	1044	20819	18896	13846	17399	18720	16048	23726	15648	16836	16410	19065	17627	16724	17198	20439	15959	16033	17163	14897	12116	14644	16205	14971	14645	15326	15439	13979	14463	16562	15008	13829	15753
181	4-Isopropylbenzaldehyde	147.082	1	26366.5	0.917978	C06577; C10428; C10452; C14309; C17965	C10H12O	-H(-)	100	181	147.082	WTWBUQJHJGUZCY-UHFFFAOYSA-N	Lipids and lipid-like molecules	1896	1916	2061	2259	8616	8104	6722	8023	8229	7168	9784	7032	7719	7943	8108	7677	7520	7824	9202	6925	6900	7549	6778	5958	7424	7614	6897	7667	7679	7754	7257	7083	7609	7348	6786	7860
182	Methionine	148.044	1	238890	0.347599	C00073; C00855; C01733; C07418	C5H11NO2S	-H(-)	100	182	148.044	FFEARJCKVFRZRR-BYPYZUCNSA-N	Amino acids, peptides, and analogues	4209	9145	3492	8868	18039	17152	17168	18947	21655	18090	18088	17209	19500	16288	20949	19640	19189	15096	23352	16526	16683	21864	17342	13613	19971	14529	19612	14308	18649	14587	13992	15909	21676	21202	16325	19287
183	Triethanolamine	148.097	1	5281.83	0.947518	C06771	C6H15NO3	-H(-)	100	183	148.097	GSEJCLTVZPLZKY-UHFFFAOYSA-N	Organic nitrogen compounds	204	256	193	342	754	702	619	734	772	647	840	717	861	730	759	688	621	697	785	569	701	794	585	578	785	687	671	625	698	740	912	751	626	732	693	815
184	alpha-Oxo-benzeneacetic acid	149.024	1	160953	-0.0374471	C02137; C03057; C10812	C8H6O3	-H(-)	100	184	149.024	FAQJJMHZNSSFSM-UHFFFAOYSA-N	Benzenoids	16754	2783	17423	3122	39761	39303	54678	52197	52974	54101	35604	55337	46639	54801	59848	64329	55032	64608	71336	39384	51890	66206	62347	45825	40196	44318	49556	35097	39745	48885	52014	57800	55510	51571	51134	50802
185	Pentose	149.046	1	164349	0.610387	C00121; C00181; C00216; C00259; C00309; C00310; C00312; C00476; C00508; C01394; C01488; C01508; C01510; C02096; C02204; C02205; C02479; C02604; C05052; C06115; C08346; C08353; C08354; C11476; C16639; C20569	C5H10O5	-H(-)	100	185	149.046	HMFHBZSHGGEWLO-SOOFDHNKSA-N	Carbohydrates and carbohydrate conjugates	819	725	490	871	19694	17502	17449	16729	19106	18280	19105	17933	18959	19940	19716	19109	18687	17984	22100	14947	17882	21257	17154	13867	17215	19541	18091	17336	17073	15885	15845	15991	18243	17292	18897	20898
186	Tolylacetate	149.061	1	124913	0.572548	C01963; C02646; C05629; C13342; C15513; C16706; C17883; C19291; C20697	C9H10O2	-H(-)	100	186	149.061	CDJJKTLOZJAGIZ-UHFFFAOYSA-N	Benzenoids	13925	15553	13246	18409	30863	30847	32057	33078	33967	32545	32744	33485	35217	39725	36952	33905	34588	36858	39314	27873	32621	37734	32937	29653	35773	35277	32915	33844	33189	32136	32449	33732	32476	33469	35543	35652
187	N-(Acetyloxy)benzenamine	150.056	1	39152.3	0.180799	C02709; C03005; C03522; C04350; C04353; C06804; C07301; C16571; C17755; C17756; C18623; C20634	C8H9NO2	-H(-)	100	187	150.056	BJKZXRGDVGYJTP-UHFFFAOYSA-N	Organic nitrogen compounds	9915	9129	9767	8196	18672	18408	17359	18804	19657	19772	20217	18431	17812	18947	18311	19147	20541	19811	21047	16826	18388	20760	18497	18582	18351	20479	18653	17696	17679	20706	17170	19401	19571	19258	18062	19704
188	3-Sulfinylpyruvate	150.972	1	2041.54	0.654546	C05527	C3H4O5S	-H(-)	100	188	150.971	JXYLQEMXCAAMOL-UHFFFAOYSA-N	Organic acids and derivatives	1182	1449	1017	1050	1490	1814	1122	1947	1919	1781	1956	1486	1440	1408	1438	1749	1313	1873	1514	1485	1529	1608	1375	1250	1716	1787	1644	1593	1397	1850	1232	1337	1457	1311	1513	1714
189	3-(Hydrohydroxyphosphoryl)pyruvate	150.98	1	2787.34	0.848278	C06368	C3H5O5P	-H(-)	100	189	150.98	VHAFWRWGHGSZDL-UHFFFAOYSA-N	Organic acids and derivatives	877	1116	819	1424	1504	1864	1441	1602	1699	2030	1793	2004	1605	1465	1749	1678	1690	1408	1490	1343	1786	1756	1663	1243	1514	1903	1566	1691	1686	1399	1367	1339	1495	1089	1565	1760
190	Xanthine	151.026	1	19262.1	0.797726	C00385; C07599	C5H4N4O2	-H(-)	100	190	151.026	LRFVTYWOQMYALW-UHFFFAOYSA-N	Organoheterocyclic compounds	1549	2947	1649	3001	7133	8710	6807	7899	7590	7752	7088	8290	7688	8440	9227	7364	9473	7234	8729	6399	7882	8961	9448	7935	9573	10081	10693	10011	10079	9545	8512	9236	8385	8832	5988	7151
191	4-Hydroxyphenylacetate	151.04	1	112039	0.0805919	C00642; C00755; C01983; C01984; C02181; C02519; C02639; C02657; C03663; C04043; C05593; C05852; C10675; C10804; C12064; C12305; C13635; C13636; C14088; C14103; C14108; C17900	C8H8O3	-H(-)	100	191	151.04	XQXPVVBIMDBYFF-UHFFFAOYSA-N	Benzenoids	7966	45868	7851	46098	50485	55270	49181	57826	64902	50156	58496	53279	59050	59985	58139	49616	61273	51384	56800	49886	57292	54086	48354	48174	52155	53264	53218	53942	52812	54037	51698	52414	51748	52239	55750	51006
192	Xylitol	151.062	1	16843.9	0.832453	C00379; C00474; C00532; C01569; C01904	C5H12O5	-H(-)	100	192	151.062	HEBKCHPVOIAQTA-SCDXWVJYSA-N	Carbohydrates and carbohydrate conjugates	1425	3190	1513	2592	7692	7581	6174	6910	7454	6353	7795	6475	7009	7903	7041	7209	6825	6811	7602	6972	6527	7411	5670	5865	6557	6983	6352	7039	6479	7657	6563	6543	6628	6462	7736	8312
193	3-Isopropylcatechol	151.076	1	33160.9	0.104343	C01014	C9H12O2	-H(-)	100	193	151.076	XLZHGKDRKSKCAU-UHFFFAOYSA-N	Benzenoids	12364	10709	10941	11380	15152	14415	14141	15576	15974	14813	15799	15384	14179	16005	15504	14690	14338	13899	15868	14726	13577	14691	16411	16469	13927	14984	14405	15639	14986	16370	15620	15832	14954	15047	14466	15266
194	4-(Hydroxylamino)-N,N-dimethylaniline	151.088	1	10356.8	0.628466	C19681	C8H12N2O	-H(-)	100	194	151.088	OQCYOHPVXHQWSI-UHFFFAOYSA-N	Benzenoids	2914	2596	2443	2711	4582	4294	3955	4825	4819	4724	4370	3907	3744	4405	4154	4678	4235	4236	4895	4066	4281	4378	4015	4172	4421	4364	4283	4331	4468	4817	4440	4709	4324	3563	3992	4189
195	(+)-Camphor	151.113	1	9222.21	0.730266	C00808; C00809; C00964; C01123; C01499; C02213; C02452; C02759; C04435; C07271; C09847; C09859; C09885; C09893; C09906; C11387; C11395; C11398; C11401; C11408; C11409; C11412; C11415; C11938; C11941; C11942; C11951; C17623; C18018; C18369; C19081; C20260; C20425	C10H16O	-H(-)	100	195	151.113	DSSYKIVIOFKYAU-MHPPCMCBSA-N	Lipids and lipid-like molecules	2701	1321	2852	1298	4414	4901	3676	4334	4065	4375	4863	4407	3778	4243	3718	4596	3658	4850	4600	3752	4142	3518	4452	4253	3607	3851	3557	4371	3497	4958	3450	4172	3758	3968	3888	4845
196	Thiocysteine	151.984	1	10386.5	0.564341	C01962	C3H7NO2S2	-H(-)	100	196	151.984	XBKONSCREBSMCS-REOHCLBHSA-N	Amino acids, peptides, and analogues	2914	5379	1946	3700	3875	4030	3218	3980	3999	4792	4411	2987	3490	3321	4972	4839	3962	4542	5157	2414	4093	2903	3091	2120	3366	3782	1984	2197	2050	2135	2490	2406	2336	2910	14914	12867
197	Fosamine	152.012	1	15140.7	0.820668	C18789	C3H8NO4P	-H(-)	100	197	152.012	UCHDFLNGIZUADY-UHFFFAOYSA-N	Organic acids and derivatives	1186	1573	1164	1449	3940	7603	5250	4929	4259	6253	3841	5533	4222	5082	6378	7470	4660	6843	6549	5758	5793	5923	10088	5915	3484	3408	5243	3473	2942	4894	4630	6030	5066	4143	6711	4807
198	3-Hydroxyanthranilate	152.036	1	108297	-0.334854	C00632; C01270; C02518; C06669; C07555; C11343; C12107; C12115; C16235; C19270	C7H7NO3	-H(-)	100	198	152.036	WJXSWCUQABXPFS-UHFFFAOYSA-N	Benzenoids	97725	99458	94842	100869	105129	105948	96442	111593	104586	97189	105873	98209	103796	108610	106183	99604	109876	99095	107708	95062	101270	102095	96502	97352	102684	105526	102238	106246	109467	105786	101161	102497	105647	105500	99723	103725
199	1,2-Diamino-4-nitrobenzene	152.046	1	27274.4	0.696385	C19384; C19385	C6H7N3O2	-H(-)	100	199	152.046	RAUWPNXIALNKQM-UHFFFAOYSA-N	Benzenoids	9296	17923	8832	18865	17613	21322	20788	20766	20875	19604	22108	19381	19060	21077	20787	19412	23331	18585	20949	18327	20614	18519	18152	18302	20423	18437	19493	20347	20375	20091	20460	18195	22110	20582	20913	20484
200	4,6-Diamino-5-formamidopyrimidine	152.059	1	10983.5	-0.210642	C06502	C5H7N5O	-H(-)	100	200	152.059	MVYUVUOSXNYQLL-UHFFFAOYSA-N	Organoheterocyclic compounds	4569	6783	4009	6337	7809	7914	7984	8303	7454	6984	8102	7155	6495	8603	7625	7364	7974	7533	7943	7007	7729	7366	7048	6979	7755	7796	7822	7939	7815	7473	7152	7726	7563	7301	7991	8202
201	Dopamine	152.072	1	39445.2	0.0281848	C03758; C04227; C16666	C8H11NO2	-H(-)	100	201	152.071	VYFYYTLLBUKUHU-UHFFFAOYSA-N	Benzenoids	5147	4394	5317	4681	7203	7519	6968	8616	7828	8256	7996	7131	7483	7149	7337	7981	7833	7775	8538	6714	6588	7538	7408	7791	8178	7458	7190	7258	6999	7809	7546	7527	7749	7642	7761	8302
202	2,3-Dihydroxybenzoate	153.019	1	41839.3	0.553782	C00196; C00230; C00628; C16748	C7H6O4	-H(-)	100	202	153.019	GLDQAMYCGOIJDV-UHFFFAOYSA-N	Benzenoids	9461	11669	8938	12365	17363	22665	23560	19081	19729	19045	20374	18668	18959	17918	19031	17702	20255	16926	21364	18848	17840	19401	19217	15413	17940	17922	16904	17962	16472	19230	18544	16614	17974	16264	17344	17866
203	Vanillyl alcohol	153.056	1	135732	0.467919	C06317; C10787	C8H10O3	-H(-)	100	203	153.056	ZENOXNGFMSCLLL-UHFFFAOYSA-N	Benzenoids	335	3457	352	3955	6911	11162	10460	16548	24486	14127	20245	10909	23079	24422	20617	12705	19999	12072	12750	18832	12061	13914	15440	9224	11401	12072	21011	11007	10790	15397	12072	10105	9831	16444	23324	11307
204	C9:2	153.092	1	39912.4	-0.276988	C09772	C9H14O2	-H(-)	100	204	153.092	VGWJUWSHYRJZKH-BWZBUEFSSA-N	Lipids and lipid-like molecules	16031	15112	14990	15083	23031	20643	20990	22784	25093	21237	20906	19780	20844	22232	20087	20079	20746	20292	23200	18996	22802	19453	19529	19948	20318	20654	20580	21621	21169	23695	22545	20870	21010	21610	20329	21753
205	(-)-Menthone	153.128	1	10193.4	0.868518	C00843; C01411; C01500; C01765; C01766; C02344; C02462; C02484; C03039; C03985; C09844; C09848; C09871; C09902; C11384; C11388; C11389; C11390; C11393; C11396; C11397; C11399; C11400; C11410; C11411; C11413; C11416; C11952; C16772; C16909; C17073; C17125; C17384; C17517; C17518; C17611; C18017; C20261	C10H18O	-H(-)	100	205	153.128	NFLGAXVYCFJBMK-BDAKNGLRSA-N	Lipids and lipid-like molecules	1052	316	854	292	3634	3511	3425	3043	3315	3138	3429	3480	3146	3331	3377	4149	2928	3170	3407	3386	3695	4714	3708	2555	2255	2503	2533	2468	2054	3477	2836	3358	2889	3371	4026	2739
206	Histidine	154.062	1	989382	0.432033	C00135; C00768; C01162; C06419	C6H9N3O2	-H(-)	100	206	154.062	HNDVDQJCIGZPNO-YFKPBYRVSA-N	Amino acids, peptides, and analogues	9089	16884	6792	23136	88227	69934	70030	70030	79460	65578	82297	64126	85644	81276	73972	70030	62834	66331	71706	64999	63052	64592	58404	64311	67047	79558	77646	77769	74124	105210	74340	92801	87237	92694	49220	56477
207	Potassium 2,6-dihydroxytriazinecarboxylate; 2,5-Furandicarboxylate	154.998	1	43772.9	0.64034	C15997; C20450	C4H2N3O4.; C6H4O5	-H(-); -H(-)	100	207	154.998	IAPCTXZQXAVYNG-UHFFFAOYSA-M	Organoheterocyclic compounds	954	1225	856	1614	5955	2670	5563	6581	7046	5260	5817	7763	7843	7595	7839	7089	7327	7457	8721	6785	7555	6104	6693	6769	8443	9333	10355	8145	7694	7263	7298	7102	7532	7163	7159	7237
208	Orotate	155.009	1	12013.4	0.826895	C00295; C03030	C5H4N2O4	-H(-)	100	208	155.009	PXQPEWDEAKTCGB-UHFFFAOYSA-N	Organoheterocyclic compounds	1388	1277	1536	1641	3704	2490	3394	3874	4068	3266	3930	4290	4292	4258	4297	4245	4448	3830	4737	3983	4446	3622	3913	3583	4066	4830	4990	4136	4340	3472	3763	3458	3934	3527	3578	4220
209	C9:1	155.108	1	36424.9	0.085551	C02445; C08471; C08501	C9H16O2	-H(-)	100	209	155.108	ZDYWPVCQPUPOJV-UHFFFAOYSA-N	Carbonyl compounds	9636	17831	9755	18050	17896	18504	15660	17856	17661	17468	18626	16672	17732	18828	19204	19844	17829	18072	17323	17519	19399	18030	17136	16797	18222	17933	18614	18736	19616	19120	18939	16996	18056	19043	19478	18377
210	(-)-Menthol	155.145	1	6567.82	0.414941	C00400; C00553; C09849; C11386; C12307	C10H20O	-H(-)	100	210	155.144	NOOLISFMXDJSKH-KXUCPTDWSA-N	Lipids and lipid-like molecules	4515	5084	4355	3593	4759	3476	4104	4280	3941	3833	4717	3652	4617	4402	4349	3827	3642	5150	4661	3366	4277	3427	3144	3581	4638	4881	4332	3675	4602	3663	4470	3326	4200	4046	3337	5293
211	2-Aminomuconate	156.031	1	12750.3	0.814767	C02220; C14293; C17358	C6H7NO4	-H(-)	100	211	156.031	ZRHONLCTYUYMIQ-TZFCGSKZSA-N	Amino acids, peptides, and analogues	1069	1297	985	1250	4671	3858	3554	4585	4792	4194	4670	4048	3803	3913	4902	3449	5220	4031	5612	4164	4384	4105	3910	3336	4400	4273	4815	4951	4553	4123	3737	3487	3961	3940	3187	4086
212	1-Nitrosonaphthalene	156.045	1	10600.6	0.832997	C14788	C10H7NO	-H(-)	100	212	156.045	HXOPMUIUKYURIC-UHFFFAOYSA-N	Benzenoids	454	1001	428	905	2699	3570	2099	2696	3361	2963	3325	2587	2305	2521	2594	2193	3113	2458	2748	2112	2532	2528	2125	2388	2459	2966	2658	2608	2730	2468	2451	1986	2380	1882	2246	2723
213	Paramethadione	156.067	1	28706.4	0.518383	C07411; C17361; C17724; C20828	C7H11NO3	-H(-)	100	213	156.067	VQASKUSHBVDKGU-UHFFFAOYSA-N	Organoheterocyclic compounds	2302	1590	2281	1773	6884	7862	6007	6086	6674	6691	7447	6736	6942	6682	6558	6191	6640	6129	7078	6041	6575	6533	5431	5423	6833	7389	7002	7222	6873	8332	7668	6832	7665	8221	6766	8058
214	Allantoin	157.037	1	87035.2	0.902276	C01551; C02348; C02350	C4H6N4O3	-H(-)	100	214	157.037	POJWUDADGALRAB-UHFFFAOYSA-N	Organoheterocyclic compounds	3500	4344	3412	4587	14290	17688	9678	8437	9723	9478	19733	9557	9947	11023	8296	8978	8900	9451	10565	8052	8958	9691	9339	8588	12046	13027	10265	11249	13073	17429	13005	14337	15322	15789	8336	9279
215	Ethyl 3-oxohexanoate	157.087	1	63961.2	0.376076	C02975; C16652; C16655	C8H14O3	-H(-)	100	215	157.087	KQWWVLVLVYYYDT-UHFFFAOYSA-N	Organic acids and derivatives	54464	58917	48656	58690	49076	43629	44520	52286	48941	46503	47444	38444	46146	46985	44632	41111	41393	43574	44076	38631	41413	43119	36415	41041	44170	46519	41609	49681	45005	48884	43370	50772	50763	46875	39269	50579
216	Nonanoic acid	157.124	1	423683	0.252222	C01601	C9H18O2	-H(-)	100	216	157.124	FBUKVWPVBMHYJY-UHFFFAOYSA-N	Lipids and lipid-like molecules	331947	318560	312117	335110	256973	239783	240277	265691	264940	229923	273580	228198	265047	269355	245308	223371	268401	231202	239867	209249	230131	235541	221914	208902	291409	283262	239783	274304	283381	254730	249402	226555	246310	246768	219171	249614
217	4-Methylene-L-glutamate	158.046	1	16599.9	0.726994	C00651; C03623	C6H9NO4	-H(-)	100	217	158.046	RCCMXKJGURLWPB-BYPYZUCNSA-N	Amino acids, peptides, and analogues	2103	1786	1789	2264	8149	7466	6180	7257	7845	7330	7725	6451	7514	7315	6967	7015	7976	7133	7847	6574	6603	8041	5997	5911	7032	8243	6453	7220	6543	7883	6652	6902	7666	6622	6721	8412
218	Indole-3-acetaldehyde	158.061	1	46880.1	0.360599	C00637; C06345; C10663; C14789	C10H9NO	-H(-)	100	218	158.061	WHOOUMGHGSPMGR-UHFFFAOYSA-N	Organoheterocyclic compounds	5883	15564	6447	14975	28859	27721	23572	32376	34930	37051	30675	28916	27177	26355	27851	25720	36142	26305	37960	22946	28741	22644	24831	39121	35723	36310	30145	34267	36752	26762	24646	23262	30502	27899	23286	30844
219	5-Acetamidopentanoate	158.082	1	30689	0.589391	C03087; C08269; C10151; C10850	C7H13NO3	-H(-)	100	219	158.082	TZZSWAXSIGWXOS-UHFFFAOYSA-N	Lipids and lipid-like molecules	1763	2900	1585	3013	13923	10452	11732	14188	15646	15560	13632	13964	13987	15330	12740	12034	14429	12808	15552	10895	13823	15622	11518	10523	15518	15643	12902	16468	16328	17508	16210	15351	17369	18573	10832	15318
220	Naphthalene-1,2-diol	159.045	1	26831.1	0.925906	C03012; C07719; C07726; C14785; C16213	C10H8O2	-H(-)	100	220	159.045	NXPPAOGUKPJVDI-UHFFFAOYSA-N	Benzenoids	2037	4108	2085	4238	6182	5873	6253	5935	5822	6557	6453	5925	5837	6168	6332	5835	6229	5925	6990	5584	5591	5751	5710	6130	5716	5707	5649	5773	5547	6397	6086	5855	6852	6111	5908	5638
221	Pimelate	159.066	1	43373.3	0.578726	C02656; C04687; C16657	C7H12O4	-H(-)	100	221	159.066	WLJVNTCWHIRURA-UHFFFAOYSA-N	Lipids and lipid-like molecules	17888	30438	16153	34665	24927	27838	24101	27291	26375	24906	32147	23301	26346	24611	28311	20470	26083	23911	24891	22312	22687	22344	18094	21832	25813	27145	24974	26391	26722	25947	25592	22835	26137	24397	21688	24468
222	Propylhydroxypentanoic acid	159.103	1	20853.5	0.569483	C03864; C03865; C16649; C16650; C16651; C17527; C20793	C8H16O3	-H(-)	100	222	159.103	LYRIITRHDCNUHV-SSDOTTSWSA-N	Organic acids and derivatives	9699	12729	9128	13516	15452	13819	13575	14671	15428	12394	13177	12120	12190	13034	13223	12169	14209	11306	14300	10279	12573	13785	10575	12743	15080	13076	12628	15070	13875	13294	12958	13095	13334	12771	11759	13069
223	Methyl-Lys	159.116	1	6437.78	0.700523	C02728	C7H16N2O2	-H(-)	35	223	159.115	PQNASZJZHFPQLE-LURJTMIESA-N	Amino acids, peptides, and analogues	1095	1509	919	1293	4486	3801	2914	3486	3925	3181	4156	3683	3447	3692	3921	3395	3276	3223	3458	3150	3163	3287	2832	2972	3835	3442	3631	4166	3335	3931	3826	3675	3987	3739	2692	3753
224	4,8-Dihydroxyquinoline	160.04	1	61736.7	0.268847	C05637; C05639; C06330; C06342; C11503; C16716; C19837	C9H7NO2	-H(-)	100	224	160.04	PYELIMVFIITPER-UHFFFAOYSA-N	Organoheterocyclic compounds	12764	10470	13054	11332	23081	30005	22728	22236	22057	27592	32164	24108	23729	25374	23811	24113	25821	23782	30986	26135	31425	25000	34649	38020	24000	24784	22058	24540	25450	27387	24037	23664	26099	25474	27257	24695
225	Aminoadipate	160.061	1	29464.6	0.836463	C00956; C01046; C01077; C02207; C03210; C05016; C06234; C17581; C19694	C6H11NO4	-H(-)	100	225	160.061	OYIFNHCXNCRBQI-BYPYZUCNSA-N	Amino acids, peptides, and analogues	2058	2088	2185	2003	7323	7264	6869	7122	7730	7666	8516	7250	7243	7699	7588	7555	7708	7394	8853	7055	6774	8332	7189	6163	7519	8587	8024	7831	7406	8706	7580	7492	8015	7811	7828	7999
226	Indole-3-ethanol	160.076	1	10447.4	0.919505	C00955; C09915	C10H11NO	-H(-)	100	226	160.076	MBBOMCVGYCRMEA-UHFFFAOYSA-N	Organoheterocyclic compounds	796	669	950	901	3279	3152	2251	4459	3603	3983	3142	2698	2157	2306	2230	2326	3015	2147	4008	2196	3214	2352	2651	3181	3185	3152	3005	3282	3080	2885	2817	2331	3586	3446	2408	3741
227	Allicin	161.011	1	255733	0.912203	C07600	C6H10OS2	-H(-)	100	227	161.011	JDLKFOPOAOFWQN-UHFFFAOYSA-N	Organic acids and derivatives	7775	35008	6458	31247	115096	133385	100857	69444	85853	64211	147292	63193	83813	92701	72770	66547	73520	63735	84072	45658	78642	106407	51914	61121	58069	91035	54340	81528	66896	86512	74713	80257	77393	72280	69471	68184
228	Umbelliferone	161.024	1	76169.6	0.91449	C09315; C20414	C9H6O3	-H(-)	100	228	161.024	ORHBXUUXSCNDEV-UHFFFAOYSA-N	Phenylpropanoids and polyketides	7607	37538	7590	42155	62316	60640	66608	57203	65061	59746	67773	57373	54359	60567	67217	61076	62565	60684	59002	59761	58681	60179	57887	52564	55203	51728	50940	57538	52187	63563	54494	54115	59882	57595	57645	57432
229	Hydroxyadipate	161.045	1	229176	0.856839	C00478; C01088; C01989; C02360; C02488; C02991; C03652; C03761; C03827; C03979; C06158; C06159; C06474; C06478; C06485; C11592; C16390; C17209; C18028	C6H10O5	-H(-)	100	229	161.045	CXKKSSKKIOZUNR-ZLUOBGJFSA-N	Alcohols and polyols	3367	13064	2939	14259	58785	60120	128070	57179	63632	61737	63874	53500	53773	56484	59075	55383	61038	53888	73245	54120	54111	60971	56752	47155	44242	47632	43589	48550	45470	57988	49076	46778	52080	47011	56226	54612
230	cis-1,2-Dihydronaphthalene-1,2-diol	161.061	1	136114	0.907099	C04314; C04514; C06205; C06358; C10472; C10475; C10490; C12088; C15419; C20269	C10H10O2	-H(-)	100	230	161.061	QPUHWUSUBHNZCG-VHSXEESVSA-N	Benzenoids	318	6589	353	7303	14721	19878	24414	15969	26022	17694	22507	16001	19581	24434	24761	17338	22108	16866	18217	18370	18655	19523	16346	12694	14928	14137	17777	14840	14009	17364	15925	15461	16111	15373	22709	16573
231	Cymarose	161.082	1	38474.6	0.732647	C08234; C08237	C7H14O4	-H(-)	100	231	161.082	DBDJCJKVEBFXHG-XZBKPIIZSA-N	Carbohydrates and carbohydrate conjugates	1608	2159	1498	2298	13026	11027	12146	14839	16035	12798	11858	12900	12855	12979	14110	13349	13685	12752	16128	12375	15218	14202	12173	10184	10346	11290	11129	10818	9322	9883	10625	8887	10239	8040	10405	12622
232	Amino-dideoxy-hexose	162.077	1	13101	0.877759	C10141; C10143; C15478; C15479; C16843; C17580; C20311	C6H13NO4	-H(-)	100	232	162.077	LXBIFEVIBLOUGU-KVTDHHQDSA-N	Organoheterocyclic compounds	270	867	323	612	4095	3985	3719	3306	3914	3636	4738	3212	3963	4102	3804	3754	3056	3773	3419	3716	3310	3457	3165	3216	3147	3631	3197	3488	3385	3727	3267	3411	3535	3639	3490	3333
233	2-Dehydro-D-xylonate	163.025	1	33081.9	0.912886	C02928	C5H8O6	-H(-)	100	233	163.025	NKOHBIIOWAKHMF-GBXIJSLDSA-N	Carbohydrates and carbohydrate conjugates	4041	12732	3363	16467	22939	25186	21430	22376	22242	22482	25486	22161	24532	22488	23576	22478	22392	26933	28171	17779	22619	24530	19528	17410	18667	18432	17577	18483	18419	21545	22545	20766	22575	21652	22929	24402
234	Coumarate	163.04	1	123550	0.752763	C00166; C00811; C01772; C02763; C05838; C06738; C07114; C10945; C12621	C9H8O3	-H(-)	100	234	163.04	BTNMPGBKDVTSJY-UHFFFAOYSA-N	Benzenoids	4057	7777	4318	9084	32653	33693	41775	39876	43221	41452	32481	42723	36315	42691	46419	47067	41492	48915	51761	33344	40204	48607	47614	37564	31885	33692	38742	27979	30941	38122	40021	41316	41088	40065	42998	40920
235	Ricinine	163.052	1	37809.6	0.854295	C01526	C8H8N2O2	-H(-)	100	235	163.052	PETSAYFQSGAEQY-UHFFFAOYSA-N	Organoheterocyclic compounds	2475	3535	2387	4133	15001	14473	15963	15198	16523	16147	15947	15732	15903	16874	16384	17364	16184	16752	19002	13749	14875	17741	16672	14866	13908	15162	15034	13074	13294	16273	15729	17618	16545	17792	14880	15207
236	Deoxyhexose	163.061	1	79203.6	0.718857	C00507; C00586; C00861; C01018; C01019; C01684; C01721; C02095; C02338; C02431; C02476; C02522; C02781; C07326; C08258; C08259; C08352; C16538; C20835; C20836	C6H12O5	-H(-)	100	236	163.061	SHZGCJCMOBCMKK-JFNONXLTSA-N	Carbohydrates and carbohydrate conjugates	911	2152	950	2250	25237	24740	20927	22701	24579	22249	29373	22412	24024	25171	24883	23887	23538	24348	27235	21530	22021	25837	22107	18273	22310	24061	22001	21844	22611	26379	24259	27439	26244	31050	19230	22996
237	Cumate	163.077	1	54526.8	0.804802	C06578; C09858; C09904; C09905; C10453; C10469; C12303; C19229; C19729	C10H12O2	-H(-)	100	237	163.077	CKMXAIVXVKGGFM-UHFFFAOYSA-N	Lipids and lipid-like molecules	5446	8161	5404	8966	18840	18557	16453	16802	18328	16329	19701	16713	17330	18208	18309	17479	16622	18139	19658	15278	16754	18149	15874	14689	17697	17285	15990	15901	15841	18449	17642	19264	18939	20412	15988	16973
238	Fenuron	163.088	1	14739.1	0.906432	C11224	C9H12N2O	-H(-)	100	238	163.088	XXOYNJXVWVNOOJ-UHFFFAOYSA-N	Benzenoids	1549	2216	1519	2361	5925	7087	6476	7032	7468	6709	8308	6379	5951	6553	7396	7161	6544	5969	7349	5830	6903	6750	6157	5291	6571	6516	6430	6136	6499	6379	7389	6377	7392	8310	5730	6815
239	Jasmone	163.113	1	19897.5	0.296969	C08490; C14226; C14466; C14697	C11H16O	-H(-)	100	239	163.113	XMLSXPIVAXONDL-PLNGDYQASA-N	Carbonyl compounds	13512	12314	13132	11672	14058	14396	13337	14296	14653	13923	13616	12662	13270	13161	14676	13397	14015	14520	15387	12345	14308	13413	14056	14308	14720	14885	14105	14687	13551	16018	14968	14631	14594	14160	14815	14146
240	Phenylalanine	164.072	1	1.1576e+06	0.623824	C00079; C02057; C02265; C07527; C18090; C18747; C19565; C19578; C20487; C20488	C9H11NO2	-H(-)	100	240	164.071	COLNVLDHVKWLRT-QMMMGPOBSA-N	Amino acids, peptides, and analogues	18068	65522	14578	49638	148710	172573	158903	165897	177497	141338	154839	145194	166978	155046	161663	142102	163279	159860	172052	123583	150113	162059	132108	131412	247579	248744	268718	240932	230378	391554	332144	355156	351658	432839	199201	208683
241	Thiodiacetic acid sulfoxide	164.984	1	12039.6	0.931115	C14873	C4H6O5S	-H(-)	26	241	164.984	AUKDKWLCVXCCBN-UHFFFAOYSA-N	Organic acids and derivatives	13002	10313	11233	9675	7721	7527	6861	6974	9169	7995	7874	8008	8949	7716	7214	7798	8078	6876	8478	6067	7323	7261	8383	6351	8252	7668	6367	7596	6935	8653	7534	6958	7580	6855	6509	7761
242	Phthalate	165.02	1	70720.5	0.672802	C01606; C03590; C06337; C14096; C14100	C8H6O4	-H(-)	100	242	165.02	XNGIFLGASWRNHJ-UHFFFAOYSA-N	Benzenoids	9835	12127	8885	13824	28935	30755	27207	30315	32528	30617	35338	31441	49221	26386	27789	27763	29966	25611	31559	25624	27352	29433	27568	23771	26542	28639	29443	27403	27990	28401	26824	25503	27996	29396	29448	29483
243	Pentonic acid	165.04	1	325613	0.352086	C00502; C00545; C00878; C01685; C05411; C05412	C5H10O6	-H(-)	100	243	165.04	QXKAIJAYHKCRRA-FLRLBIABSA-N	Carbohydrates and carbohydrate conjugates	4738	14150	5066	14330	112044	100484	98321	93772	96375	90406	105755	90687	97157	106391	95129	98308	88639	93048	102152	79041	97660	114761	86545	77027	81579	92337	83838	85453	87433	98885	97635	98045	94266	97157	99790	101570
244	Pyridoxal	166.051	1	44617.4	0.102088	C00250; C03493; C03986; C05831; C06051; C12323; C14170; C14171; C20821	C8H9NO3	-H(-)	100	244	166.051	RADKZDMFGJYCBB-UHFFFAOYSA-N	Organoheterocyclic compounds	3253	4466	3097	4953	17554	16550	14110	15315	17424	15114	16216	14001	14551	15619	15741	14716	15258	14596	17162	13675	15198	16618	14185	13287	13566	14978	15541	15044	13755	15790	14706	15534	15341	15973	16516	15016
245	2,4-Diamino-6-nitrotoluene	166.063	1	17190	0.0583518	C16396; C16397	C7H9N3O2	-H(-)	100	245	166.063	DFZSBQYOXAUYCB-UHFFFAOYSA-N	Benzenoids	2127	3402	1986	3467	7270	7627	7001	7395	7992	7605	7804	6906	7203	7209	7781	7868	7428	7553	7987	6312	7283	7932	7492	6775	6864	7368	7453	7067	6659	7274	7257	7344	6971	8132	7334	7490
246	(-)-Sympatol	166.087	1	9618.25	0.698903	C01869; C04548; C05587; C07146; C07441; C07453; C07832; C08273; C19582	C9H13NO2	-H(-)	100	246	166.087	YRCWQPVGYLYSOX-VIFPVBQESA-N	Benzenoids	1926	2330	2080	2657	3599	3083	3332	3405	3486	3804	4299	3474	3000	3154	3999	3680	3807	3375	3597	3375	3421	3969	2835	3251	3875	3903	3456	3861	3771	4111	4217	4096	4158	4200	3731	3368
247	Urate	167.021	1	38527.3	0.121377	C00366	C5H4N4O3	-H(-)	100	247	167.021	LEHOTFFKMJEONL-UHFFFAOYSA-N	Organoheterocyclic compounds	1428	2804	1503	2786	14598	15779	11538	12377	14328	19248	14242	15212	16057	13653	14186	16103	13022	11458	14350	16005	19965	16935	17859	5021	7081	11907	10018	9045	6855	7827	6833	6669	9058	7499	11623	10032
248	N-Cyclopropylammelide	167.056	1	40370.2	0.891267	C14149	C6H8N4O2	-H(-)	65	248	167.056	BLNVGTGPKHCQME-UHFFFAOYSA-N	Organoheterocyclic compounds	3771	3675	3536	3559	18369	17528	15140	19352	20452	18257	20849	17163	18946	18047	18422	18467	17217	19214	20243	15679	19593	17516	20712	12815	15775	16640	16038	14128	16134	15906	13966	15070	16278	17652	13372	15436
249	N-Cyclopropylammelide	167.058	1	34377.2	0.940113	C14149	C6H8N4O2	-H(-)	100	249	167.058	BLNVGTGPKHCQME-UHFFFAOYSA-N	Organoheterocyclic compounds	3200	3199	3154	3135	15491	15839	13178	17139	18387	16441	18885	15411	16764	16085	16346	16501	15649	16858	18066	13890	17005	15417	18052	11228	14009	14713	14476	12497	15016	14055	11447	13300	14696	16019	11196	13602
250	N-Trimethyl-2-aminoethylphosphonate	167.072	1	38204.1	0.514602	C06459	C5H15NO3P	-H(-)	100	250	167.071	VCANKBLUHKRQLL-UHFFFAOYSA-O	Organic acids and derivatives	9658	8898	9660	10142	18023	16954	15739	17068	17883	16577	19086	15039	17134	16698	16986	16693	15442	18762	18069	13702	18051	16668	17022	13719	14805	16230	15679	14793	15679	16247	15235	15107	15579	16010	14599	15590
251	Pyridoxamine	167.083	1	13985.2	0.640986	C00534; C11846; C13710	C8H12N2O2	-H(-)	100	251	167.083	NHZMQXZHNVQTQA-UHFFFAOYSA-N	Organoheterocyclic compounds	2447	2399	2427	2553	6234	5984	5581	6609	6410	6040	7064	6076	6404	6352	6314	6007	5722	6495	6592	5367	5911	5966	6048	5243	5743	5959	6064	5161	5980	6139	5301	5794	5823	6001	5393	5581
252	C10:2	167.108	1	22967.4	-0.0265386	C00848; C02108; C03448; C06069; C08489; C08498; C08546; C09785; C09786; C09804; C09836; C09842; C09854; C11402; C11403; C11414; C11418; C11651; C11937; C11943; C11944; C16461; C18019; C19083; C19731; C20221; C20222; C20223; C20322; C20323	C10H16O2	-H(-)	100	252	167.108	CCBAAZXPXFYPBE-UHFFFAOYSA-N	Organoheterocyclic compounds	13801	11475	13120	12296	14800	14427	15267	15208	15390	14247	14929	13716	13628	14803	14553	13944	14527	13618	17927	13058	13970	12887	13619	14394	15188	14665	14890	14719	15202	14670	13944	13944	15328	15331	13169	16078
253	2-Methylisoborneol	167.144	1	13922.4	0.443378	C20243	C11H20O	-H(-)	100	253	167.144	LFYXNXGVLGKVCJ-BOBPJJCASA-N	Lipids and lipid-like molecules	4917	4152	4455	4958	5862	4791	4384	4795	4473	4655	4765	3594	5018	5492	4917	4467	3819	4388	4834	4208	4787	4638	4004	3813	4754	4458	4864	4017	4253	4547	4656	4059	5002	4213	3313	4749
254	Phosphodimethylethanolamine	168.043	1	80973.9	0.596242	C13482	C4H12NO4P	-H(-)	100	254	168.043	BLHVJAAEHMLMOI-UHFFFAOYSA-N	Organic acids and derivatives	1242	2864	1209	2921	19734	17170	18014	19177	20758	19002	21641	19985	23026	23320	19620	20381	21121	21118	20500	19851	20948	20447	18172	15737	21746	24030	18997	21824	23309	21644	21655	20919	22148	20169	16451	19327
255	Pyridoxine	168.066	1	20223	0.643635	C00314; C00547	C8H11NO3	-H(-)	100	255	168.066	LXNHXLLTXMVWPM-UHFFFAOYSA-N	Organoheterocyclic compounds	1745	1692	1596	1924	5979	6407	5903	6118	6681	6418	6682	6307	7206	6819	6478	6216	6378	6983	6841	5942	6393	7000	5795	5084	6257	7340	6320	6560	7376	7148	6928	6363	7105	7413	5841	6616
256	Methyl-His	168.079	1	9572.42	0.764047	C01152; C03298	C7H11N3O2	-H(-)	100	256	168.078	JDHILDINMRGULE-LURJTMIESA-N	Amino acids, peptides, and analogues	1282	1518	1288	1610	3245	3971	3597	3765	3937	3876	3901	3587	3700	3722	3809	3717	3685	3657	4116	3509	3732	4207	3480	3193	3671	4043	3636	3670	3979	3981	3820	3735	4282	4097	3674	3608
257	Piperidione	168.103	1	5704.56	0.790383	C17730	C9H15NO2	-H(-)	100	257	168.103	RGEVWUKXWFOAID-UHFFFAOYSA-N	Organoheterocyclic compounds	1508	2045	1105	2085	2959	2949	2387	3187	2886	3010	3170	3008	3124	3220	2626	3065	3090	3078	3179	2619	2890	2765	2798	2581	3660	3565	3194	3193	3645	4021	3759	3738	3955	4009	2842	3018
258	Nitramine	168.139	1	1139.21	0.936364	C10163; C10773	C10H19NO	-H(-)	100	258	168.139	POCJOGNVFHPZNS-ZJUUUORDSA-N	Organoheterocyclic compounds	368	351	462	470	528	663	669	793	883	751	688	619	596	689	571	557	548	734	850	621	643	814	720	663	663	829	520	787	580	716	790	554	642	631	728	529
259	Thiourocanic acid	169.007	1	25823.8	0.859187	C05571	C6H6N2O2S	-H(-)	100	259	169.007	ZBKFFCZXHBPGFK-OWOJBTEDSA-N	Organoheterocyclic compounds	6719	6120	6403	7433	20236	20389	25785	24216	24267	24571	23335	22319	21070	22559	23813	20641	22948	20392	26733	19697	22650	21365	17772	17666	26178	24391	23774	24392	26346	26434	23183	27226	29410	33491	17305	21806
260	Gallate	169.014	1	39116.3	0.671796	C01424	C7H6O5	-H(-)	100	260	169.014	LNTHITQWFMADLM-UHFFFAOYSA-N	Benzenoids	16000	15329	15927	15987	30975	27962	31251	31511	34279	29540	34034	29822	31782	31274	34004	33950	35544	31243	34336	28039	35474	29805	29207	26902	31340	31276	27661	29456	30369	29518	28769	30136	28908	28411	30066	29889
261	3,4-Dihydroxyphenylethyleneglycol	169.051	1	33634.1	0.76083	C05576; C06720; C06729; C06731; C07123; C16804; C19495	C8H10O4	-H(-)	100	261	169.05	MTVWFVDWRVYDOR-UHFFFAOYSA-N	Benzenoids	5286	6011	5309	6886	14853	17111	13935	17361	17197	18361	19921	15636	14302	16144	14819	15583	16853	16897	19386	13986	15001	15239	15819	14970	15622	15611	16189	18779	15325	17502	14750	14918	14607	13979	15371	15751
262	2-Hydroxybiphenyl	169.065	1	30228.4	0.632645	C02499; C14224; C14342	C12H10O	-H(-)	100	262	169.065	LLEMOWNGBBNAJR-UHFFFAOYSA-N	Benzenoids	7171	9982	8371	11358	11173	13908	13234	12846	12750	13080	15231	13292	13193	18827	14625	14055	15724	16797	15413	10055	12067	12845	11443	11453	22636	15409	13171	19106	17565	15177	14928	12698	14537	14013	15335	14851
263	Furfural diethyl acetal	169.088	1	49837.3	0.204633	C14280	C9H14O3	-H(-)	100	263	169.088	SEILDMUKBMYIEZ-UHFFFAOYSA-N	Organoheterocyclic compounds	35542	35605	33394	36781	32384	34786	31831	35784	33937	33261	34861	32016	33686	34405	31990	31846	31838	32858	33754	29078	33646	31318	27385	35019	37171	34135	33380	34459	33788	36056	36578	33399	35386	33764	33627	34954
264	Levetiracetam	169.099	1	11383.3	0.815591	C07841	C8H14N2O2	-H(-)	100	264	169.099	HPHUVLMMVZITSG-LURJTMIESA-N	Amino acids, peptides, and analogues	6099	6403	5522	6022	7788	8061	8210	8353	7922	8062	8247	8121	7457	7463	7493	7129	7692	7626	8014	6830	7534	7691	7157	7800	9765	8202	9300	8305	7707	8926	7991	7619	7618	8499	8750	8274
265	C10:1	169.123	1	26597.6	-0.108645	C03092; C04433; C07276; C09790; C16462; C17621; C18020; C18027; C18066; C18202; C19082; C20326	C10H18O2	-H(-)	100	265	169.124	YVCUGZBVCHODNB-ZCUBBSJVSA-N	Organoheterocyclic compounds	18884	18980	19829	19243	21525	21403	18632	20793	20785	16838	22834	19413	20733	20578	19610	18350	17831	17152	17602	17331	18472	18057	18025	17752	21111	19515	18206	18197	17699	19210	21838	19087	19883	20083	19522	19763
266	2-Undecanone	169.16	1	4763.85	0.50802	C01875	C11H22O	-H(-)	100	266	169.16	KYWIYKKSMDLRDC-UHFFFAOYSA-N	Carbonyl compounds	3943	3792	3602	4681	3652	3734	3999	4178	4162	3800	3540	4052	3323	4245	3993	3824	4814	3896	3969	3745	3707	3555	2523	3712	3756	4123	4269	3988	3303	3837	3569	3535	4071	3923	3751	3828
267	4-Toluenesulfonamide	170.027	1	13615.5	0.890982	C14412	C7H9NO2S	-H(-)	100	267	170.027	LMYRWZFENFIFIT-UHFFFAOYSA-N	Benzenoids	1820	2744	1562	2825	5856	5675	5304	6100	6284	6000	5641	5048	6507	6126	6368	5785	5616	6661	7224	5550	5816	6012	6020	4845	4941	5373	5000	5048	4790	5256	4813	4847	4843	4815	5062	5020
268	2,3,4,5-Tetrahydrodipicolinate	170.046	1	29351.4	0.674484	C03972; C12108; C17356	C7H9NO4	-H(-)	100	268	170.046	CXMBCXQHOXUCEO-BYPYZUCNSA-N	Amino acids, peptides, and analogues	1048	1797	889	1906	7701	7687	7375	8436	10117	8503	9276	7225	7487	8242	8299	8434	8897	7838	9583	6674	7799	8149	7308	6911	8175	7271	7783	8042	7944	7282	7382	6724	7254	6743	7419	7899
269	Crotanecine	170.083	1	9635.1	0.766314	C10284; C11837	C8H13NO3	-H(-)	100	269	170.083	VMWCRDCGNVMCGJ-BWZBUEFSSA-N	Alkaloids and derivatives	1758	2561	1451	2588	4557	5185	4756	4966	6124	5758	5583	4834	5490	4948	5433	4832	5033	5163	6234	4115	4322	5605	4775	4614	5453	5582	5323	5455	4894	5001	5075	4462	5391	4625	4798	5291
270	Toluene-4-sulfonate	171.012	1	28599.4	0.829035	C06677	C7H8O3S	-H(-)	100	270	171.012	JOXIMZWYDAKGHI-UHFFFAOYSA-N	Benzenoids	3464	3934	3380	4445	13201	14116	14320	12148	14687	15561	15326	15857	15349	17572	12856	12947	13860	12056	14342	13197	13593	14450	15783	13140	18994	19982	15608	15326	19139	18175	15324	15633	16608	15862	9403	12168
271	3-Dehydroshikimate	171.03	1	19865.9	0.878311	C02637; C02652; C03063; C05600; C07478; C07479; C18306; C18318	C7H8O5	-H(-)	100	271	171.03	SLWWJZMPHJJOPH-PHDIDXHHSA-N	Carbonyl compounds	4234	4269	4308	5138	9960	10165	8761	9522	10180	9895	9588	9087	9282	8424	10658	9580	11273	8700	11153	8680	10309	9949	9369	7120	8778	9230	8024	8464	8194	8240	7601	6961	8068	7541	7825	8169
272	Menadione	171.045	1	18233.6	0.873302	C05377; C08446; C08774; C11427; C14091; C14101	C11H8O2	-H(-)	100	272	171.045	MJVAVZPDRWSRRC-UHFFFAOYSA-N	Benzenoids	2982	4470	2651	4646	6928	7006	6095	6400	6880	6966	6840	5745	5816	6471	6750	5944	6766	6299	7163	5723	6300	7082	6681	5729	6570	6539	6423	6685	6343	6346	6346	6560	6358	6064	6071	6346
273	Capillone	171.082	1	30938.4	0.913645	C16928	C12H12O	-H(-)	100	273	171.082	GHNBEBDYYSVNEK-XPQLPGEHSA-N	Benzenoids	4344	8540	4016	9071	11582	10791	10614	9161	11436	13350	11513	10091	12927	12659	10543	11393	10892	11977	15346	12497	9631	13539	12722	12529	15812	12280	10805	15236	11040	13450	12006	13688	9934	10386	14244	10185
274	9-Oxononanoic acid	171.103	1	103301	0.731128	C16322	C9H16O3	-H(-)	100	274	171.103	WLGDDELKYAWBBL-UHFFFAOYSA-N	Lipids and lipid-like molecules	74125	81800	63655	99303	73941	70278	79344	78702	80606	68152	79020	63315	67116	69264	70692	65835	67807	64852	70064	61876	60045	64837	57210	62656	75863	65379	66211	74179	73503	68380	67151	61613	83691	66170	67287	66594
275	Decanoic acid (FA10:0)	171.139	1	222493	-0.125111	C01571; C02904; C12289; C12292	C10H20O2	-H(-)	100	275	171.139	GHVNFZFCNZKVNT-UHFFFAOYSA-N	Lipids and lipid-like molecules	202057	183470	178534	198182	157717	153193	152943	165492	157285	138901	163740	136439	156468	154149	155563	135825	162362	146296	147808	131654	151805	139629	122477	133245	174883	166358	146476	154606	164048	148476	154384	137546	157878	148439	138298	158770
276	2-Quinolinecarboxylic acid	172.04	1	19457.9	0.621196	C06325; C06414; C14040; C19474	C10H7NO2	-H(-)	100	276	172.04	LOAUVZALPPNFOQ-UHFFFAOYSA-N	Organoheterocyclic compounds	2605	4133	2792	4893	6884	8399	7234	8002	8870	8519	9058	7524	7622	7622	8209	7678	8846	7035	9068	6967	7951	7064	7260	7397	7969	8351	8081	7483	8157	7640	6586	6383	8131	7346	7784	7622
277	Acetyl-Leu	172.098	1	146972	0.872047	C02710; C10173	C8H15NO3	-H(-)	100	277	172.098	WXNXCEHXYPACJF-ZETCQYMHSA-N	Amino acids, peptides, and analogues	107	205	104	172	9340	7521	8358	9088	10872	10672	8088	9600	9756	11030	9623	9139	9762	8910	10036	7684	10632	10779	8383	6490	10396	10392	8489	10724	9599	10660	11613	10617	10821	11437	8297	12415
278	Aconitate	173.009	1	99017.3	0.808128	C00417; C02341; C05422	C6H6O6	-H(-)	100	278	173.009	GTZCVFVGUGFEME-IWQZZHSRSA-N	Organic acids and derivatives	1066	2143	960	2763	14325	9627	11085	14461	16438	12595	13996	12999	11684	12593	14920	12859	15559	12346	18788	11299	12217	16112	12463	9860	11866	14234	12919	13784	12660	12807	11932	10551	12340	11153	11261	12219
279	Quinoxaline-2-carboxylic acid	173.035	1	22300.5	0.920414	C18624; C19560	C9H6N2O2	-H(-)	100	279	173.035	UPUZGXILYFKSGE-UHFFFAOYSA-N	Organoheterocyclic compounds	2294	1841	1719	2498	6359	6339	5252	5971	6515	5819	9289	5504	5994	5757	6183	5244	6446	5464	7242	4531	5511	6145	5180	4336	5660	6443	5745	5918	6344	6406	5779	5653	5620	6129	4719	5767
280	Shikimate	173.046	1	39661.3	0.819974	C00493; C04236; C16588; C18307; C18312	C7H10O5	-H(-)	100	280	173.046	JXOHGGNKMLTUBP-HSUXUTPPSA-N	Alcohols and polyols	5692	7613	5265	9899	20260	23835	14361	16102	17184	17291	44310	16088	17726	15617	17881	17045	17350	15287	20022	15059	16420	16171	14321	12450	14711	13080	12186	12430	12489	11610	10711	10608	12677	10055	15428	17733
281	Formimino-Glu	173.057	1	43430.9	0.960213	C00439; C16674	C6H10N2O4	-H(-)	100	281	173.057	NRXIKWMTVXPVEF-BYPYZUCNSA-N	Amino acids, peptides, and analogues	1947	2946	2269	3099	12518	11192	13246	16188	15686	13826	14147	10949	11280	12736	13669	12539	12327	11655	17282	9591	9474	10907	11012	8625	9407	8719	8730	9662	9272	9963	8342	9754	10258	9512	8385	8459
282	Indole-acetamide	173.074	1	50853.6	-0.238829	C02693; C02937; C13008	C10H10N2O	-H(-)	40	282	173.074	ZOAMBXDOGPRZLP-UHFFFAOYSA-N	Organoheterocyclic compounds	11925	10909	10673	10418	30488	25181	23962	23239	22415	22811	33091	22340	27250	24105	23420	21552	20715	21821	24191	19283	20802	21488	19441	18533	24597	23524	22346	26550	25490	28690	25147	30787	26974	31768	16873	20143
283	Suberic acid	173.082	1	125790	0.708534	C08278; C14570; C16658; C19402	C8H14O4	-H(-)	100	283	173.082	TYFQFVWCELRYAO-UHFFFAOYSA-N	Lipids and lipid-like molecules	47459	41343	36570	42056	62291	58410	47433	50298	47761	47390	75216	42760	56185	48557	49560	45759	45276	44089	43948	43773	40254	39055	40148	40343	56035	48859	48312	56381	53529	60834	51304	60649	62138	64998	37692	44386
284	Arginine	173.105	1	893660	0.565344	C00062; C00792; C02385	C6H14N4O2	-H(-)	100	284	173.105	ODKSFYDXXFIFQN-BYPYZUCNSA-N	Amino acids, peptides, and analogues	26221	9203	20714	11710	125052	100175	101486	64592	67774	71898	136661	79613	116081	74262	88632	84642	65726	74552	68075	73220	72284	56259	72472	75984	96904	92633	108012	112445	128411	142764	115131	135561	130955	159005	44437	67575
285	Acetyl-Asp	174.041	1	39076.7	0.904347	C01042; C01045; C05520	C6H9NO5	-H(-)	100	285	174.041	OTCCIMWXFLJLIA-BYPYZUCNSA-N	Amino acids, peptides, and analogues	808	144	860	144	6799	1755	2272	5145	4204	10289	9447	24230	9108	7370	10759	9305	16293	10680	13105	8574	10512	7570	7462	4723	24804	19288	16112	12703	13446	9089	5956	5283	7898	8106	7193	17040
286	Citrulline	174.089	1	279533	0.868817	C00327	C6H13N3O3	-H(-)	100	286	174.089	RHGKLRLOHDJJDR-BYPYZUCNSA-N	Amino acids, peptides, and analogues	4172	1432	3482	808	13177	12471	8830	9935	10905	10358	18008	10250	8850	9076	9805	10077	10025	11427	13793	9076	9043	9890	9068	8293	14237	11551	10135	10551	12075	17420	12987	15099	17311	18273	5897	7946
287	Hexuronic acid; Ascorbate	175.025	1	63672.9	0.832703	C00072; C02670; C03217; C03289; C03387; C04053; C04349; C04471; C06033; C06430; C06440; C19806; C20364	C6H8O6	-H(-)	100	287	175.025	CIWBSHSKHKDKBQ-JLAZNSOCSA-N	Organoheterocyclic compounds	1424	1199	1228	1175	13218	10533	7534	13126	15349	19467	11612	15157	14977	12878	12926	14373	20892	13625	20095	11144	12363	6447	8472	20783	18422	23983	14739	17732	20847	7305	5985	5111	9794	7349	7493	14245
288	1,3,8-Naphthalenertriol	175.04	1	35620	0.889317	C01173; C03081; C09268	C10H8O3	-H(-)	100	288	175.04	USWUTUCXLQBQCG-UHFFFAOYSA-N	Benzenoids	2374	2371	2287	2949	7921	5753	4749	6918	7771	9897	8195	10437	8412	7702	9546	8910	12061	8666	10881	8123	9324	5990	7022	8615	12365	13139	11624	10570	11006	6479	6224	5516	7234	6258	7247	9509
289	Allantoate	175.047	1	29324	0.891873	C00499	C4H8N4O4	-H(-)	100	289	175.047	NUCLJNSWZCHRKL-UHFFFAOYSA-N	Amino acids, peptides, and analogues	1539	1390	1544	1642	7249	5838	4324	6358	7001	9339	9218	11249	7252	6970	8034	7100	11321	8970	10056	6343	8139	6207	5667	7386	14226	13405	10636	9691	10717	9694	7712	7441	8814	9823	6158	10184
290	3-Propylmalate	175.061	1	35825.1	0.759681	C02123; C02504; C03328; C04411	C7H12O5	-H(-)	100	290	175.061	LOLHYFQEDPGSHZ-AKGZTFGVSA-N	Organic acids and derivatives	3072	6034	2868	7295	24062	20408	14536	18532	17966	24580	25265	17243	14455	13698	19505	15927	17652	16761	20571	15459	17975	13423	14148	11107	14015	12771	12107	11938	10156	9677	9089	9334	10685	9521	29449	24301
291	Ethyl cinnamate	175.078	1	41211.5	0.902721	C06359; C10389; C12299; C14083; C14102; C14111	C11H12O2	-H(-)	69	291	175.078	KBEBGUQPQBELIU-CMDGGOBGSA-N	Phenylpropanoids and polyketides	8365	10802	11045	13804	12485	15681	14399	13876	13326	13849	16656	15199	16133	22781	16513	15819	16829	19100	16714	10078	10269	10768	10926	10892	27990	18596	13819	20764	18632	16302	14526	13720	16044	13830	18993	18396
292	L-Cladinose	175.098	1	19519	0.887601	C11917; C18744	C8H16O4	-H(-)	100	292	175.098	AJSDVNKVGFVAQU-BIIVOSGPSA-N	Carbonyl compounds	4651	4723	5110	5310	6744	6802	5679	6365	7118	6633	8950	6266	7241	7124	6927	6528	6256	6309	7236	6025	5590	5792	5737	5248	8396	6776	6014	7970	7267	7016	6528	6842	7366	7583	6151	6854
293	4-Hydroxyaminoquinoline N-oxide; Hydroxy-methyl-Glu	176.055	1	20337.2	0.908913	C04050; C06034; C07899; C17576; C20844; C20845	C6H11NO5; C9H8N2O2	-H(-); -H(-) [+1]	30	293	176.055	XGXCMUKDRZHNCO-UHFFFAOYSA-N	Organoheterocyclic compounds	307	1068	273	1072	3529	3434	2907	2988	3140	3747	4398	3054	3323	3532	3552	3025	3779	3427	3638	2873	3329	3149	2914	2782	3276	3288	3076	3202	3254	4028	3610	3312	4029	3579	3783	3621
294	Anthopleurine	176.092	1	8181.14	0.844037	C16994	C7H15NO4	-H(-)	100	294	176.093	ZOPACRMLVDFSGJ-NTSWFWBYSA-N	Organic acids and derivatives	85	606	76	583	1922	1857	1524	1403	1267	1589	2147	1371	1403	1587	1844	1644	1574	1676	1559	1594	1458	1393	1414	1402	1485	1338	1326	1457	1340	1484	1274	1636	1745	1624	1412	1304
295	Phenmetrazine	176.108	1	4432.27	0.81125	C07432; C09991	C11H15NO	-H(-)	100	295	176.108	OOBHFESNSZDWIU-UHFFFAOYSA-N	Organoheterocyclic compounds	315	1103	413	1364	1481	1676	1313	1715	1526	1603	2138	1800	1802	1611	1817	1966	1568	1933	1794	1547	1430	1572	1661	1819	1621	1496	1544	2327	1472	2062	1875	1917	2352	2119	2150	1860
296	Glucono-lactone	177.042	1	41276.1	0.928933	C00198; C00204; C00273; C00691; C01040; C01115; C01216; C02669; C02692; C02779; C03107; C03269; C03383; C03926; C05394; C05410; C06892; C16737; C17577; C19679; C20251; C20680	C6H10O6	-H(-)	72	296	177.042	PHOQVHQSTUBQQK-SQOUGZDYSA-N	Carbohydrates and carbohydrate conjugates	3195	14289	3184	14311	26559	29701	23356	22503	24988	23156	32838	23084	22319	27143	25737	22417	24836	23062	27427	21380	21971	26616	21129	19057	20944	21120	20165	22340	21826	25765	24008	21195	23705	22930	22295	24083
297	Vermelone	177.056	1	69931.7	0.897975	C01624; C02666; C10667; C14784; C20327; C20646	C10H10O3	-H(-)	100	297	177.056	AQTKGZASUQVMEJ-UHFFFAOYSA-N	Benzenoids	6947	23224	7437	25805	20608	26806	28364	25217	26137	20802	27755	26555	28662	38611	30573	30381	29688	34951	27521	20199	19949	23142	21319	18935	44939	32441	26260	37777	35238	28865	28123	24256	30062	24715	33172	29782
298	Methyleugenol	177.093	1	46380.6	0.368517	C10454; C10478; C14535; C14709; C17663; C17665; C17666; C17782	C11H14O2	-H(-)	100	298	177.093	ZYEMGPIYFIJGTP-UHFFFAOYSA-N	Benzenoids	15855	14643	14872	15866	19528	20950	16911	19153	17841	17760	19930	17415	17954	20066	18424	19395	18704	18218	18441	16047	17928	17083	16751	16311	22528	18744	17477	19053	19136	18301	18124	19143	18912	18016	19226	19198
299	Propofol	177.128	1	8035.19	0.804252	C07523; C14465	C12H18O	-H(-)	100	299	177.128	OLBCVFGFOZPWHH-UHFFFAOYSA-N	Benzenoids	2301	1931	2243	1955	3791	3830	2894	3435	3589	4133	3450	2839	3275	3475	4307	4335	3495	3068	3683	3427	3624	2885	3898	4020	3635	3644	3839	3821	3113	3746	3850	3338	3413	3661	3696	4013
300	3-(4-Hydroxyphenyl)pyruvate	179.035	1	106240	0.791546	C01179; C01197; C01405; C01481; C05350; C12623; C13400	C9H8O4	-H(-)	100	300	179.035	KKADPXVIOXHVKN-UHFFFAOYSA-N	Benzenoids	528	4029	458	3884	12569	13994	17519	12793	16392	12793	14526	12683	12649	13695	15592	13805	13444	12842	15653	13368	13102	15988	13467	10318	9618	10365	11077	10112	9878	12509	11379	10406	11150	10884	13659	11713
301	3-tert-Butyl-5-methylcatechol	179.109	1	76171.7	0.898357	C03929	C11H16O2	-H(-)	100	301	179.108	YKYXORJDSTUCTN-UHFFFAOYSA-N	Benzenoids	97	698	85	731	5836	6629	7183	6219	7550	6347	6522	5947	6140	6729	7410	6820	6872	6340	7770	5944	6149	7972	6417	5156	4856	5504	5723	5048	5375	6393	5601	5871	6400	6177	6487	6214
302	Tyrosine	180.066	1	821573	0.446075	C00082; C01536; C03290; C04368; C06420; C19579; C19712; C20807	C9H11NO3	-H(-)	100	302	180.066	OUYCCCASQSFEME-QMMMGPOBSA-N	Amino acids, peptides, and analogues	6776	45573	5775	22925	70748	102307	152736	72620	86988	91336	98598	86016	81902	74249	80362	79203	87188	75680	105753	70992	93806	89982	81593	72993	196768	204870	190060	183948	201575	317304	275578	277714	341650	347371	82535	93970
303	Saccharin sodium anhydrous	180.984	1	19069.7	0.76296	C12284	C7H4NO3S.	-H(-)	100	303	180.984	WINXNKPZLFISPD-UHFFFAOYSA-M	Organoheterocyclic compounds	9955	11414	10660	11347	14757	14215	33309	11664	13643	13792	15535	12083	13691	12397	13128	12509	13499	15100	15285	13483	15236	13149	13702	12721	11882	12888	11101	12352	14193	13676	13116	10497	13368	11398	14229	11573
304	2-Oxo-4-phosphonobutanoate	180.99	1	13189.1	0.789225	C17941	C4H7O6P	-H(-)	100	304	180.99	JDJXYEAWFIGKSA-UHFFFAOYSA-N	Organic acids and derivatives	7050	8584	7570	9658	9834	10296	37453	9364	10827	10901	12199	9089	10611	8859	10814	9958	11436	9849	9918	10007	10332	9742	8795	8335	9205	9535	9358	9631	10109	8716	8286	8591	9720	8612	9167	10327
305	Stipitatate	181.014	1	53385.4	0.714466	C01853; C06680; C12325; C14097	C8H6O5	-H(-)	100	305	181.014	ANEBWDNUQVPSJT-UHFFFAOYSA-N	Hydrocarbon derivatives	13343	9843	12222	11195	23966	24210	21279	22814	23974	26600	28527	25530	25964	24052	26312	25265	32611	26054	28355	29226	25652	21612	25658	17778	24017	25347	22070	22883	24938	21107	22013	19396	23598	19655	20307	24204
306	2,4-Dinitrotoluene	181.026	1	23541.5	0.765779	C11006; C11008; C14306; C19410; C19788	C7H6N2O4	-H(-)	100	306	181.026	RMBFBMJGBANMMK-UHFFFAOYSA-N	Benzenoids	7706	5755	7440	6509	8844	9310	8074	8975	8976	8839	9955	8783	9249	8948	9665	8825	11247	8373	9819	9254	9638	8015	8831	6985	8965	9138	8179	9091	8558	8102	8579	7332	8732	7739	7880	8884
307	Diisopropyl sulfate	181.056	1	32585.8	0.422657	C19230	C6H14O4S	-H(-)	24	307	181.056	HWBLTYHIEYOAOL-UHFFFAOYSA-N	Organic acids and derivatives	1273	2836	1096	3314	9103	11359	9683	8871	9860	8740	9061	8458	7381	8024	8371	8482	8839	8519	9352	7480	8162	8390	8164	6976	7821	8224	7864	7819	7728	8059	8107	7369	8330	8144	7953	8022
308	Dacarbazine	181.085	1	43093.2	0.484262	C06936	C6H10N6O	-H(-)	100	308	181.085	FDKXTQMXEQVLRF-ZHACJKMWSA-N	Organic acids and derivatives	4732	8453	4756	7221	11474	14178	12094	13287	14521	13329	13902	12057	12327	12079	13775	12831	12382	12234	15015	11848	11797	13806	12675	12557	12322	13066	12407	14411	12942	14779	13359	13465	14459	14667	12650	13054
309	Geranyl formate	181.124	1	13054.6	0.822628	C12294; C14113	C11H18O2	-H(-)	100	309	181.124	FQMZVFJYMPNUCT-YRNVUSSQSA-N	Lipids and lipid-like molecules	4307	2627	3346	2921	4529	5633	5189	5250	4799	5314	5259	5151	5103	4707	5134	5379	4761	5177	5247	4483	4628	5002	5639	5229	5273	5088	5186	4694	5052	5851	5211	5340	5545	5747	5338	5426
310	Saccharin	181.992	1	6700.03	0.811688	C12283	C7H5NO3S	-H(-)	100	310	181.992	CVHZOJJKTDOEJC-UHFFFAOYSA-N	Organoheterocyclic compounds	1873	2976	1884	2398	4105	4046	3750	3527	3577	3746	5536	3147	3076	3016	4066	3206	3952	3768	4393	2976	3831	2500	2989	3121	3922	3802	3895	3616	3638	3025	4342	4222	4912	4580	3059	4298
311	5-Nitrosalicylate	182.01	1	20012.7	0.496833	C19789	C7H5NO5	-H(-)	100	311	182.01	PPDRLQLKHRZIJC-UHFFFAOYSA-N	Benzenoids	13889	14742	11972	14661	11707	12966	11859	12185	11687	12127	12772	11156	10712	11078	12312	11141	13071	12117	11598	11713	10285	11317	10651	10274	11314	10564	10808	10921	11346	12224	12032	9910	11030	11958	9689	11085
312	4-Pyridoxate	182.046	1	33964.8	0.688503	C00847; C04447; C04773; C11466; C12026	C8H9NO4	-H(-)	100	312	182.046	HXACOUQIXZGNBF-UHFFFAOYSA-N	Organoheterocyclic compounds	2106	2516	2105	2676	8648	8960	8207	9382	10396	9393	9069	9370	9990	10616	10260	9392	9979	9098	10031	8325	8677	10534	8989	7099	8268	9878	9317	9349	9347	9090	8564	9613	9176	9656	8553	9485
313	4-Amino-2-hydroxylamino-6-nitrotoluene	182.058	1	20227.9	0.91687	C16403	C7H9N3O3	-H(-)	100	313	182.058	VQMWRUKXHJGSIE-UHFFFAOYSA-N	Benzenoids	793	1485	825	1379	4393	4933	4301	4836	5467	4946	4911	4260	5277	5066	4662	4823	4783	4891	5165	4139	4308	4762	4300	4178	4595	5012	4743	4978	4799	4947	4707	4542	4114	4866	4271	4616
314	L-Adrenaline	182.082	1	15023.5	0.784154	C00788; C05589; C11768; C17925	C9H13NO3	-H(-)	100	314	182.082	UCTWMZQNUQWSLP-VIFPVBQESA-N	Benzenoids	1141	2608	1285	2300	3994	4279	3840	3942	4460	4354	4454	4438	4214	4354	4046	4244	3748	4520	4527	3545	3855	4031	4131	3646	4042	4222	4306	3826	4236	4637	4517	4303	4288	4535	4100	4722
315	Tecostanine	182.155	1	1126.87	0.897157	C09989	C11H21NO	-H(-)	100	315	182.155	CRVXJVHSLVEDRI-UHFFFAOYSA-N	Organoheterocyclic compounds	425	772	460	283	630	712	578	808	659	582	600	587	472	452	553	564	702	481	519	491	624	617	782	611	590	488	421	503	643	632	393	606	615	720	467	645
316	7-Methyl-2-hydroxy-6-oxoocta-2,4-dienoate; Choline-P	183.066	1	34082.7	0.781562	C00588; C04535; C05594; C06582; C10765; C11456; C11588	C5H15NO4P; C9H12O4	-H(-); -H(-)	100	316	183.066	YHHSONZFOIEMCP-UHFFFAOYSA-O	Organic nitrogen compounds	5838	6570	5651	6979	10846	9853	9966	11283	12696	10989	12441	10371	10788	11219	13837	11011	10749	11386	14056	10216	10484	9265	9791	8838	9388	10175	10183	9318	9376	9886	8937	9228	9733	10341	8328	9574
317	5-exo-Hydroxy-1,2-campholide	183.103	1	46927.8	0.256004	C03843; C04718; C06066; C11405; C11419; C19079; C19084; C20324	C10H16O3	-H(-)	100	317	183.103	CLHVOQQIYBCJNZ-PRZNWYJVSA-N	Organoheterocyclic compounds	5060	13697	4159	15062	21394	19332	18427	23370	22180	20337	21760	19381	19032	19334	21036	18884	20618	18919	22689	19066	20208	18843	23032	21334	18614	18813	19292	18578	20263	22379	21462	21221	23915	20851	18711	23903
318	Citronellyl formate	183.139	1	35230.5	0.120299	C12295; C13823; C13910; C19420	C11H20O2	-H(-)	100	318	183.139	DZNVIZQPWLDQHI-UHFFFAOYSA-N	Lipids and lipid-like molecules	13630	15312	12282	15672	13554	15358	14726	15505	16330	14924	14775	14574	13843	15000	15001	13888	15503	14328	14754	13646	13496	13965	13755	14723	15509	15719	14863	15796	15466	14325	13786	14464	15311	14114	14320	14185
319	Dodecylaldehyde	183.176	1	5218.76	0.581472	C02278	C12H24O	-H(-)	100	319	183.176	HFJRKMMYBMWEAD-UHFFFAOYSA-N	Carbonyl compounds	3778	3780	3247	4000	3412	3042	3723	3557	4642	3719	3402	3513	3364	3912	3841	3782	3381	3752	3403	3461	3432	3377	2961	2896	3802	3806	4129	3265	3354	3559	3280	3392	3192	3464	2907	3634
320	Phosphoserine	184.002	1	123213	0.827394	C01005; C02532	C3H8NO6P	-H(-)	100	320	184.002	BZQFBWGGLXLEPQ-REOHCLBHSA-N	Amino acids, peptides, and analogues	155	38	131	41	6368	7279	7156	7177	8656	8808	5786	8544	7287	8282	8501	8544	7644	7854	10501	7914	7265	10381	8589	6525	7785	8935	8421	8874	7813	10616	9716	9113	9815	8619	7934	8803
321	cis-2-Carboxycyclohexyl-acetic acid	185.082	1	94896.1	-0.0211505	C14112	C9H14O4	-H(-)	100	321	185.082	GCGCKIUIBPEAQE-BQBZGAKWSA-N	Organic acids and derivatives	17399	26722	15859	28958	21131	26054	22004	24209	24777	20535	26083	20202	24012	20476	24068	21841	22327	21049	23013	20349	20819	22821	18287	21111	25943	24014	22466	23055	23352	21720	23381	20780	21862	23698	20689	22331
322	Undecanoic acid	185.155	1	81323.3	-0.184806	C17715	C11H22O2	-H(-)	100	322	185.155	ZDPHROOEEOARMN-UHFFFAOYSA-N	Lipids and lipid-like molecules	67393	62934	63482	64040	53478	53004	51404	54614	57917	48824	52095	46554	48483	51121	53295	46479	54418	52808	50398	49144	53744	52068	45818	47560	55745	53220	51469	57136	59907	51404	52546	47424	53028	52436	50449	54927
323	8-Amino-7-oxononanoate	186.114	1	25411.3	0.766283	C01092; C12029	C9H17NO3	-H(-)	100	323	186.114	GUAHPAJOXVYFON-UHFFFAOYSA-N	Lipids and lipid-like molecules	7218	12782	6095	8189	7967	8765	9344	9050	8005	9398	9546	9646	8801	9165	7412	7033	7181	7139	9473	7405	7214	8355	7104	7683	20141	7480	8648	9393	8569	9517	9041	9833	8443	28589	7272	7307
324	n-Decanohydroxamic acid	186.15	1	3785.74	0.882445	C12889	C10H21NO2	-H(-)	100	324	186.15	QZXOLBPUAUOQFB-UHFFFAOYSA-N	Organic oxygen compounds	1856	2710	1399	1967	2069	1795	1883	2152	1711	2121	2393	1915	2404	2118	2067	2042	1797	1556	1510	2107	2252	2218	1684	2234	2244	1811	1558	2728	2370	1603	2329	1587	1854	2765	1817	1352
325	1-Hydroxy-2-naphthoate	187.039	1	32110.2	0.89728	C03203; C10387; C10398; C16212	C11H8O3	-H(-)	100	325	187.039	SJJCQDRGABAVBB-UHFFFAOYSA-N	Benzenoids	1188	6199	1216	1878	6659	5126	5420	7012	8458	6407	7122	6704	7023	6213	7831	7331	7355	6908	8254	6407	7393	6190	5858	5184	7307	6948	6114	7766	6802	5579	6357	7492	6664	6348	5739	10269
326	2-Oxosuberate	187.062	1	45501.9	0.762216	C16589	C8H12O5	-H(-)	100	326	187.062	HAGOOZVJLSSXGZ-UHFFFAOYSA-N	Organic acids and derivatives	8664	18789	7794	17532	19838	20802	14195	19353	20334	18530	25576	16210	18401	18233	19025	15628	19855	16558	19075	15741	16927	15242	15287	15640	18487	17076	15622	19413	18974	16919	17091	16380	17168	16256	14700	18551
327	Azelaic acid	187.098	1	152873	0.800157	C08261; C17878	C9H16O4	-H(-)	100	327	187.098	BDJRBEYXGGNYIS-UHFFFAOYSA-N	Lipids and lipid-like molecules	71202	121589	56784	111925	70771	70829	74488	92697	86524	91658	104035	66562	83138	81785	81998	66193	69461	63505	68733	67064	61750	70226	54826	68883	107916	68391	71649	84200	75654	73077	72680	74749	82509	83332	64946	70641
328	10-Hydroxydecanoic acid	187.134	1	23907.1	0.660664	C02774; C18067	C10H20O3	-H(-)	100	328	187.134	YJCJVMMDTBEITC-UHFFFAOYSA-N	Organic acids and derivatives	12475	15761	12673	15173	13719	13431	14458	14810	13823	13598	15126	13222	15203	14288	13406	12904	14893	12544	12582	11960	11172	12727	9636	13606	16421	15157	14206	13202	14816	15293	14422	13136	13620	14362	11862	12454
329	4-Hydroxy-2-quinolinecarboxylic acid	188.036	1	24463.3	0.572977	C01717; C02172; C14800; C14802; C16715; C18621	C10H7NO3	-H(-)	100	329	188.036	HCZHHEIFKROPDY-UHFFFAOYSA-N	Organoheterocyclic compounds	5197	4635	4694	4596	9716	8618	7223	9540	10092	9472	9929	8966	8730	8974	9694	9494	10324	8800	10509	8367	9689	9417	7978	7841	9828	9578	8851	10338	9182	8271	9207	8253	9113	9078	7929	9917
330	Acetyl-Glu	188.056	1	42087.6	0.853777	C00624; C03871; C12109	C7H11NO5	-H(-)	100	330	188.056	RFMMMVDNIPUKGG-YFKPBYRVSA-N	Amino acids, peptides, and analogues	801	409	634	323	10659	8324	6714	9072	9605	8774	11230	8001	7876	9548	10347	9696	9998	9089	10646	8103	10028	9354	8955	6056	9308	8467	7397	8936	9026	7220	6591	7190	8443	7838	7624	9827
331	3-Dehydroquinate	189.041	1	29403.2	0.778764	C00944; C04049; C05601; C06201	C7H10O6	-H(-)	100	331	189.041	WVMWZWGZRAXUBK-SYTVJDICSA-N	Organic acids and derivatives	5159	9412	4748	10885	11199	11917	10039	11200	10602	10668	11690	9165	10934	10414	11591	9695	10074	9812	10540	9624	9954	15955	8359	8308	9056	9685	10116	9903	9985	10511	10422	10190	9999	10310	8145	9831
332	7-Ethoxycoumarin	189.056	1	28435.2	0.888901	C11052; C14105; C15102; C17916	C11H10O3	-H(-)	100	332	189.056	LIFAQMGORKPVDH-UHFFFAOYSA-N	Phenylpropanoids and polyketides	3529	4012	3567	4224	8823	9246	6594	7527	7902	7493	10198	7452	7462	7825	8382	7732	8228	8110	8287	6772	7611	8358	6595	5497	7804	7333	6894	8172	7726	7480	7147	6913	7457	7237	7110	7691
333	(R)-3-((R)-3-Hydroxybutanoyloxy)butanoate	189.077	1	35519.7	0.875671	C04546	C8H14O5	-H(-)	100	333	189.077	RILHUWWTCSDPAN-PHDIDXHHSA-N	Organic acids and derivatives	3141	5758	2980	6133	30587	37017	10829	13020	13113	14694	44261	12532	15082	12061	13775	12019	13720	12950	13929	11340	11875	12461	10809	10165	14753	14301	13402	13854	12737	13458	11984	11345	13342	12781	13225	13692
334	Diaminopimelate	189.088	1	60901	0.73969	C00666; C00680	C7H14N2O4	-H(-)	100	334	189.088	GMKMEZVLHJARHF-WHFBIAKZSA-N	Amino acids, peptides, and analogues	390	2513	329	1621	14815	15598	9965	10479	11307	10553	18248	10276	10966	11012	10351	9430	10099	10340	12258	9634	9511	11271	9489	9492	12253	10991	11763	11550	12434	14419	12405	12904	13583	15614	10288	10027
335	5-Hydroxyindoleacetate	190.051	1	33538	0.597524	C05635; C06725; C16596	C10H9NO3	-H(-)	100	335	190.051	DUUGKQCEGZLZNO-UHFFFAOYSA-N	Organoheterocyclic compounds	3074	3161	2973	3692	10888	10565	10965	11388	12726	12245	12863	10464	10267	10172	13589	11601	12005	11952	14928	11349	11172	12498	11729	9655	10709	10200	10738	11113	10145	12983	11525	11443	11464	11456	11676	9651
336	Phendimetrazine	190.123	1	2326.92	0.903796	C07904; C10935; C10938	C12H17NO	-H(-)	100	336	190.123	MFOCDFTXLCYLKU-CMPLNLGQSA-N	Organoheterocyclic compounds	235	272	245	317	699	708	608	643	639	802	644	772	566	647	602	847	591	850	857	693	730	574	718	693	747	757	650	732	659	704	688	713	730	556	626	810
337	(Iso)Citrate	191.02	1	668785	0.339575	C00158; C00311; C00451; C00679; C02780; C03600; C03921; C04575; C04617; C12649	C6H8O7	-H(-)	69	337	191.02	KRKNYBCHXYNGOX-UHFFFAOYSA-N	Organic acids and derivatives	24822	182711	21609	246969	114707	125947	115329	127773	133824	97488	105476	93305	91480	117713	112276	101020	136438	105441	150991	67878	95127	121994	95667	85620	89618	107177	81684	91195	101509	88144	100117	92638	87712	86736	101366	121016
338	Scopoletin	191.035	1	913368	0.502302	C01752; C01938; C03830; C04033; C06203; C06204; C10290; C16913; C18077; C18079; C20462	C10H8O4	-H(-)	65	338	191.035	RODXRVNMMDRFIK-UHFFFAOYSA-N	Phenylpropanoids and polyketides	609	56994	550	70564	51025	87394	59521	75394	146306	56372	105013	53818	69068	106947	119529	54086	105863	60518	67681	63831	92889	102570	67182	55322	40241	51306	67681	48941	57491	59575	55681	66735	63118	62607	72106	73561
339	Quinate	191.056	1	166916	0.823601	C00296; C01295; C12113	C7H12O6	-H(-)	65	339	191.056	AAWZDTNXLSGCEK-WYWMIBKRSA-N	Alcohols and polyols	1038	10222	915	13088	19711	27429	18125	16797	22013	14775	51630	14071	17779	18172	19718	13871	19677	16603	19480	13781	17737	18871	14945	12170	14617	14558	16312	14390	14550	14446	14034	14856	14567	14248	15120	16836
340	Carpacin	191.072	1	86748.5	0.76226	C10435; C10480; C10493; C12343; C14104; C16896; C17840; C20465	C11H12O3	-H(-)	100	340	191.072	OTRFVHWXENKCEG-ONEGZZNKSA-N	Organoheterocyclic compounds	373	6092	321	7261	8344	9067	8206	8524	10652	7960	15379	7553	8212	9032	9820	7713	9815	8616	9491	7142	8300	9312	7583	7212	7494	7264	7574	7095	7217	7374	7565	7664	7580	7642	8662	8378
341	3,4-Methylenedioxymethamphetamine	192.102	1	56532.4	0.809494	C07577; C07875; C09460; C09640; C18418; C18957	C11H15NO2	-H(-)	100	341	192.102	SHXWCVYOXRDMCX-UHFFFAOYSA-N	Organoheterocyclic compounds	2187	2748	1886	2501	2517	3081	2338	2988	3212	2820	3035	2471	2403	2837	2932	2733	2913	2779	2854	2830	2529	2789	2678	2534	2605	2693	2924	2792	2815	2915	2949	2641	3005	2537	2439	2867
342	Scytalone	193.05	1	94344.3	0.757226	C00779; C01494; C02379; C09974; C10470; C10477; C11233; C12204; C16982	C10H10O4	-H(-)	100	342	193.05	RTWVXIIKUFSDJB-ZETCQYMHSA-N	Benzenoids	543	2230	516	2769	11363	12063	11753	13254	14768	13249	12322	12576	12846	14045	14659	13741	13842	12933	15500	12130	11899	13929	13557	10438	10360	10898	12111	10203	9833	12052	10871	11795	11224	11566	13479	12204
343	5-O-Methyl-myo-inositol	193.072	1	88050.4	0.952649	C03365; C03619; C03659; C03660; C03844; C05163; C06352; C06353; C08257	C7H14O6	-H(-)	100	343	193.072	DSCFFEYYQKSRSV-GWJPIIGYSA-N	Alcohols and polyols	297	569	239	593	7989	8702	9287	7682	9443	6778	7981	8482	10022	10692	11160	8750	6364	8200	10727	7359	7334	9500	7625	5321	6009	6936	7759	6417	5598	7925	7185	8205	9131	8890	10239	7824
344	6-Hydroxypseudooxynicotine	193.098	1	30864.6	0.831208	C01297; C17964	C10H14N2O2	-H(-)	100	344	193.098	UMLOUOBDBGOHHR-UHFFFAOYSA-N	Carbonyl compounds	1502	1791	1316	2143	4961	5221	5772	5024	5768	5503	5171	5281	6176	7168	6851	5907	4873	6002	7385	5221	5460	7077	6094	4605	4417	4936	5109	4553	4071	5698	4988	5624	5562	5396	6265	5368
345	Oxidized Latia luciferin	193.16	1	6147.59	0.852556	C03527	C13H22O	-H(-)	100	345	193.16	QJJDNZGPQDGNDX-UHFFFAOYSA-N	Lipids and lipid-like molecules	1908	2336	1903	2435	2751	3136	2808	3566	3624	3287	3271	2702	3292	3237	3098	4008	3314	3180	3225	3087	3535	2842	3706	3254	3014	2822	2521	2914	2620	2639	2691	2600	3274	2770	3683	2381
346	alpha-[3-(Nitrosoamino)propyl]-3-pyridinemethanol	194.093	1	17583	0.939411	C19581	C9H13N3O2	-H(-)	100	346	194.094	QCCXEQGBFPINIY-UHFFFAOYSA-N	Organoheterocyclic compounds	1275	2834	1531	2581	4557	4596	5051	4031	4766	4913	4605	5743	5198	5260	5287	4674	4623	4554	4996	4098	4483	4048	4710	4511	4811	4232	4537	4217	4332	5348	4486	4935	4727	4951	4973	4004
347	Tetrahydroxypteridine	195.016	1	20536.3	0.897333	C03178; C03314	C6H4N4O4	-H(-)	100	347	195.016	MVKRISPIRVEPFM-UHFFFAOYSA-N	Organoheterocyclic compounds	1648	1780	1545	1941	5687	6102	5688	6513	6617	6753	6906	6735	6616	6774	6984	6779	6849	6509	8323	5739	5885	6995	7253	6494	5827	6631	5730	5798	6279	7126	6515	7373	7019	7238	5801	6145
348	Hexonic acid	195.051	1	428555	0.826205	C00257; C00514; C00770; C00800; C00817; C00880; C03215; C15930	C6H12O7	-H(-)	100	348	195.051	RGHNJXZEOKUKBD-SQOUGZDYSA-N	Carbohydrates and carbohydrate conjugates	1665	3920	1218	6338	41777	44708	41736	45626	48179	49727	46055	43177	40355	41734	47429	48044	52157	45379	63204	37438	43398	50152	45988	37838	37518	40878	40623	38713	37550	43123	40981	42688	43749	45108	40716	45736
349	Fasoracetam	195.113	1	17417.1	0.934401	C13311	C10H16N2O2	-H(-)	100	349	195.113	GOWRRBABHQUJMX-MRVPVSSYSA-N	Amino acids, peptides, and analogues	1217	895	1168	945	5810	5744	4503	5612	5289	5473	6726	5789	5657	5539	4699	5172	5185	5189	5806	4426	5052	4225	5264	4726	5204	5430	5675	5642	6108	6348	5472	5662	5564	6293	4516	6354
350	Ethyl(E,Z)-decadienoate	195.14	1	43355.5	0.343645	C08486; C09837; C09861; C09863; C11338; C12300; C12301; C12302; C12306	C12H20O2	-H(-)	100	350	195.14	OPCRGEVPIBLWAY-QNRZBPGKSA-N	Lipids and lipid-like molecules	20023	19229	20966	21316	21820	24265	19713	23381	23031	21452	25152	21966	19620	23145	21314	21962	21142	23247	21813	20720	21793	21196	19949	22505	22222	22801	22304	22821	21920	22395	21148	21364	21341	21185	22103	21400
351	3-Hydroxy-2-methylpyridine-4,5-dicarboxylate	196.026	1	29896.1	0.719398	C04604; C06661; C15771	C8H7NO5	-H(-)	100	351	196.026	LVJJEIJOKPHQOU-UHFFFAOYSA-N	Organoheterocyclic compounds	7483	6183	7849	7223	9123	9045	7938	8684	8851	8809	10054	8329	8851	8226	9102	7928	9032	8404	9373	8051	8368	8367	8622	7442	8239	8801	8802	8777	8910	9276	8224	9165	9278	9484	7616	8509
352	2-Amino-5-phosphopentanoic acid	196.039	1	22620.8	0.917536	C13734; C17942	C5H12NO5P	-H(-)	100	352	196.039	VOROEQBFPPIACJ-UHFFFAOYSA-N	Amino acids, peptides, and analogues	2730	3595	2650	3644	6265	6184	5639	5540	6497	6221	6325	5847	5602	5318	6502	5527	5771	5987	6339	4663	5360	5386	5538	5598	5847	5359	5836	5774	6281	5906	6224	5619	5601	5844	6114	6313
353	L-Metanephrine	196.098	1	10956	0.803791	C05588; C20371	C10H15NO3	-H(-)	100	353	196.098	JWJCTZKFYGDABJ-VIFPVBQESA-N	Benzenoids	1926	1021	2024	1133	5324	5160	3850	4699	5052	5037	6417	5195	4486	5302	4692	4934	4654	5249	5082	3805	4766	3635	5291	4767	4752	5137	4889	5183	5543	4891	5064	5052	4964	4969	4642	6191
354	Phosphoenol-4-deoxy-3-tetrulosonate	196.985	1	14602	0.836652	C04309	C4H7O7P	-H(-)	100	354	196.985	FPQJGWWGSNGINK-UHFFFAOYSA-N	Lipids and lipid-like molecules	6153	4772	5709	5315	7182	7706	8070	7027	7826	8120	6525	6858	6556	7479	8432	7040	7501	6801	7190	5850	6754	6875	6268	6156	6307	6381	6748	6684	6903	7454	6657	6163	6305	6741	7802	6629
355	3-(3,4-Dihydroxyphenyl)lactate	197.046	1	36214.7	0.625358	C01207; C05584; C10833	C9H10O5	-H(-)	100	355	197.046	PAFLSMZLRSPALU-UHFFFAOYSA-N	Phenylpropanoids and polyketides	3150	3928	3073	5076	9834	11081	9231	10335	10123	10173	12306	10748	9771	9106	10940	10278	11801	10235	11273	10064	10084	11303	11070	8538	9886	9252	9077	9801	9621	10657	8913	9419	9454	8800	10307	10291
356	3,4-Dihydroxyfluorene	197.062	1	24661.5	0.756793	C07717; C07724; C08447; C14230; C16926; C17856	C13H10O2	-H(-)	100	356	197.061	OOGFPMKHMOAMMY-UHFFFAOYSA-N	Benzenoids	2069	3082	2034	3128	5568	6997	4650	7255	7532	6972	7655	6497	5890	6230	7528	7264	7936	5602	7942	6731	5492	7645	6967	5685	6701	6432	7141	6577	6105	6553	5254	6249	6355	6263	5502	7072
357	cis-2,3-Dihydroxy-2,3-dihydro-p-cumate	197.082	1	31858.2	0.679901	C06579; C09853; C16644; C17454; C20789	C10H14O4	-H(-)	100	357	197.083	BUZNWVREDOAOGD-DTWKUNHWSA-N	Lipids and lipid-like molecules	6122	7878	5133	7935	10594	10834	8669	9706	10355	10351	11317	9852	9685	9674	10425	9829	9772	9915	10750	9654	9631	9701	8926	9378	10310	10232	10022	10908	10183	9924	10305	9880	10565	9668	9497	9850
358	Slaframine	197.13	1	7497.05	0.885805	C06185	C10H18N2O2	-H(-)	100	358	197.13	YYIUHLPAZILPSG-SMILAEQMSA-N	Organoheterocyclic compounds	1237	641	1050	596	2902	2928	2648	2897	2942	2702	2733	2985	2634	2570	2692	2960	2320	2605	2966	2705	2980	3587	2792	2091	2552	2325	2447	2561	1948	2849	2151	2596	2533	2579	2983	2565
359	C12:1	197.155	1	38398.2	0.211696	C09870; C12298; C16825; C16947	C12H22O2	-H(-)	100	359	197.155	XHXUANMFYXWVNG-ADEWGFFLSA-N	Lipids and lipid-like molecules	13163	11791	13012	12739	10938	11910	12060	13605	12335	11000	12838	12036	13397	12129	11939	12680	12311	11846	12079	11078	13078	13561	12259	10535	13969	13073	11772	13876	12110	13735	12536	12036	11812	12281	11688	12271
360	Cycluron	197.166	1	6576.24	0.81924	C19109	C11H22N2O	-H(-)	100	360	197.166	DQZCVNGCTZLGAQ-UHFFFAOYSA-N	Organic acids and derivatives	2094	1898	2077	2070	2689	2500	2406	2853	2649	2507	2795	2323	2533	2611	2406	2313	2647	2567	2583	2578	2643	2695	2538	2218	2507	2454	2304	2572	2650	2653	2591	2665	2417	2201	2824	2400
361	Dictamnine	198.056	1	37373.4	0.930615	C10660; C10697; C19269; C19473	C12H9NO2	-H(-)	100	361	198.056	WIONIXOBNMDJFJ-UHFFFAOYSA-N	Organoheterocyclic compounds	327	2284	359	2225	6558	6189	6052	8076	13193	10932	9676	7442	8797	7142	9155	6846	9506	6748	8226	5635	6519	4707	5763	10168	8291	6593	9152	7896	7779	4897	5196	4984	5389	5804	5938	7071
362	Tussilagine	198.114	1	6771.48	0.89683	C10411; C12448	C10H17NO3	-H(-)	100	362	198.114	LADVYSUMGRTFSZ-QXFUBDJGSA-N	Organoheterocyclic compounds	1482	797	1187	568	4134	4194	3612	3778	3456	3917	4102	3655	3672	3401	3804	4696	3322	3438	3875	3702	3616	4581	3625	3189	3433	3023	3203	3190	2745	3746	3397	3773	3074	3672	3674	3365
363	Dodecanamide	198.186	1	2412.11	0.846946	C13831	C12H25NO	-H(-)	100	363	198.186	ILRSCQWREDREME-UHFFFAOYSA-N	Lipids and lipid-like molecules	3716	1708	1597	1534	2321	1600	1847	2763	2837	2349	4147	1629	1915	3048	2197	2110	1557	2569	1648	1802	1817	1728	2208	2341	1720	2723	1951	1987	2324	2682	1868	2626	1806	1778	2510	1822
364	Meconic acid	198.988	1	15440.1	0.899843	C20209	C7H4O7	-H(-)	100	364	198.988	ZEGRKMXCOCRTCS-UHFFFAOYSA-N	Organoheterocyclic compounds	15651	12630	16352	14293	10329	10509	14549	11661	10937	11368	11661	12446	14801	15157	15872	12398	11036	16265	17407	9342	14251	13053	10442	7745	8846	8306	8115	7788	10149	11100	14480	12255	11727	14299	12638	17225
365	4-Maleylacetoacetate	199.025	1	24184.9	0.91101	C01036; C01061; C04642; C04783; C05592; C06318; C18314	C8H8O6	-H(-)	100	365	199.025	GACSIVHAIFQKTC-UPHRSURJSA-N	Organic acids and derivatives	3086	2662	3405	2764	6437	6788	6712	6814	6911	8191	9034	7575	7456	6449	8444	8278	9200	7021	9561	8788	7742	6567	7965	5948	6454	7254	6570	5764	6301	5579	5443	4908	5545	4756	6576	5881
366	Dodecanoic acid (FA12:0)	199.171	1	598040	0.694586	C02679	C12H24O2	-H(-)	100	366	199.171	POULHZVOKOAJMA-UHFFFAOYSA-N	Lipids and lipid-like molecules	296445	230746	248267	243121	170044	170844	153349	181417	171068	154690	173042	159444	177938	173201	179543	155919	191118	158108	155570	154713	175376	156759	129528	159964	217014	189397	163743	186900	187936	165837	171633	151458	166617	149666	157249	170961
367	Diethyl 2-methyl-3-oxosuccinate; Metamitron	201.077	1	44978.4	0.897659	C04067; C10930	C10H10N4O; C9H14O5	-H(-); -H(-)	100	367	201.077	OQOCQBJWOCRPQY-UHFFFAOYSA-N	Organic acids and derivatives	11739	17281	10168	19962	16836	18438	15103	17141	17027	17292	20175	15542	16499	16629	17571	14952	17680	14958	16012	14635	15522	15887	13748	15308	16188	16582	15214	15506	17584	16523	16111	15262	15657	15753	13358	16143
368	Tremetone	201.092	1	37193.5	0.93549	C08992	C13H14O2	-H(-)	100	368	201.092	UVYUUQGGBNKRFU-CYBMUJFWSA-N	Benzenoids	4252	4346	4311	5757	9331	9070	8608	10064	9164	10924	11932	10325	8165	8064	10007	9716	10142	10413	9529	10869	9174	10000	11070	7204	12074	10561	8291	10769	11001	8463	8806	10885	8890	10663	8741	9499
369	Dinotefuran	201.099	1	17769.8	0.60526	C18509	C7H14N4O3	-H(-)	100	369	201.099	YKBZOVFACRVRJN-UHFFFAOYSA-N	Organic nitrogen compounds	2874	3380	2598	3399	8304	8440	6676	6822	6894	7533	8759	6687	6658	6843	6914	6556	16994	6597	18506	6160	5756	6582	6645	6108	7673	7433	6283	6889	7423	8628	7454	8348	14390	8843	6100	6976
370	Sebacic acid	201.113	1	60678	0.787744	C08277; C14566; C17803	C10H18O4	-H(-)	100	370	201.113	CXMXRPHRNRROMY-UHFFFAOYSA-N	Lipids and lipid-like molecules	13140	23368	11313	23046	32396	33579	26894	29583	27984	28945	36551	24634	24980	26118	25404	28399	24425	23443	26620	21557	24327	27895	24745	27608	29914	27075	28413	31088	28043	29131	27740	29213	27479	28998	28237	29378
371	Dimethyl-Arg	201.135	1	15851	0.828682	C01404; C03626	C8H18N4O2	-H(-)	100	371	201.136	AKGWUHIOEVNNPC-LURJTMIESA-N	Amino acids, peptides, and analogues	2409	2587	1111	1885	8920	6238	8184	4698	4925	4750	6283	5342	4999	4350	4623	4371	4385	9181	4094	6756	7171	4143	8261	4878	5382	5477	5586	5280	5257	5609	4226	4895	9119	5143	8147	4417
372	Acetylaminoadipate	202.072	1	33952.2	0.837979	C12986	C8H13NO5	-H(-)	100	372	202.072	FTTGAAZKBNZDCZ-LURJTMIESA-N	Amino acids, peptides, and analogues	1334	1458	1213	1561	6047	5506	5395	5834	6553	6621	6177	6672	6407	6513	6128	6292	6119	5932	7287	5592	5734	6538	6230	5212	6922	7242	6237	6471	7024	6921	6250	5936	6457	7002	5732	6069
373	Tryptophan	203.083	1	956849	0.624185	C00078; C00525; C00806; C07839; C10968; C14916	C11H12N2O2	-H(-)	100	373	203.083	QIVBCDIJIAJPQS-VIFPVBQESA-N	Organoheterocyclic compounds	13009	38049	8820	35258	42682	58081	54848	55616	58307	53321	57713	43427	56637	48383	53548	47821	58864	53709	56637	44506	52886	55971	43353	41456	109683	91215	108010	88985	90775	161864	141540	149034	153678	190753	58144	61214
374	Lathodoratin	205.051	1	61352.9	0.948186	C09012; C09311; C14085; C14086; C14092; C20210	C11H10O4	-H(-)	100	374	205.051	SCZKCXUGDWJJGV-UHFFFAOYSA-N	Organoheterocyclic compounds	2227	276	1917	283	6546	5510	6365	5875	6897	6279	7786	5790	5581	5869	7243	7274	5567	7509	6933	7356	5502	5760	7860	6063	5190	5135	5702	6548	5390	7847	5895	6745	6700	6732	6133	4947
375	Benzyl 2-methyl-3-oxobutanoate	205.088	1	53791.2	0.821318	C04000; C10476; C12458; C14567	C12H14O3	-H(-)	100	375	205.088	OKNHVWOSKITDKX-UHFFFAOYSA-N	Benzenoids	6535	7583	7450	9702	9754	11661	11320	11279	11610	11669	13560	11542	12049	14436	11856	12383	12090	13570	13127	9047	9249	10291	9996	9759	18582	14024	11405	15218	14450	13954	11681	12164	12866	11835	12631	12920
376	Ibuprofen	205.124	1	30782.9	0.752431	C01588; C02185	C13H18O2	-H(-)	100	376	205.124	HEFNNWSXXWATRW-UHFFFAOYSA-N	Phenylpropanoids and polyketides	5993	1368	5346	1374	6225	6923	6542	6052	6797	7040	6698	6457	5939	6321	6833	7470	6447	6986	8485	6151	6061	7045	7351	6495	6121	6454	6477	6430	5918	7697	6903	7501	7133	7630	7562	7256
377	alpha-Irone	205.159	1	186610	0.41993	C09690; C11350; C14132; C14205	C14H22O	-H(-)	100	377	205.159	JZQOJFLIJNRDHK-UZPJXDOOSA-N	Lipids and lipid-like molecules	68530	73101	64034	74243	68887	75359	69999	72577	68924	72863	79394	76141	81272	96473	75589	81935	96849	87298	87956	71581	74789	75387	67463	59792	125105	103428	79494	90550	88018	90281	94817	69860	74692	68444	89328	87107
378	Benzthiazuron	206.039	1	28186.1	0.648475	C19058	C9H9N3OS	-H(-)	100	378	206.039	DTCJYIIKPVRVDD-UHFFFAOYSA-N	Organoheterocyclic compounds	5699	12761	6072	14150	9214	9383	8458	9620	9861	9762	10455	9330	7835	8274	9919	8962	10364	9374	10528	9581	7865	10324	9368	6816	8533	8888	8450	10799	8179	9641	8420	7993	9894	9732	8693	9068
379	Acetyl-Phe	206.082	1	30907.8	0.601314	C03519; C05620; C09933; C09986; C20126	C11H13NO3	-H(-)	100	379	206.083	CBQJSKKFNMDLON-JTQLQIEISA-N	Amino acids, peptides, and analogues	1044	1243	1075	1251	6201	8617	5575	5977	6290	7032	8040	6275	5708	6228	6761	6670	6432	6783	7038	6199	6180	7117	6120	4664	6392	5783	6006	5799	5580	6508	6808	6453	6851	6919	5980	7015
380	Fraxetin	207.03	1	58916.4	0.861457	C09265; C20772	C10H8O5	-H(-)	100	380	207.03	HAVWRBANWNTOJX-UHFFFAOYSA-N	Phenylpropanoids and polyketides	1172	832	1071	980	7785	8778	8242	9066	9286	8824	9310	9438	8124	7000	9680	10527	9305	8558	11299	8927	8137	9539	8517	6542	6829	8023	7637	7202	6930	7788	8693	7314	9364	7450	7898	8884
381	Benzyl (2R,3S)-2-methyl-3-hydroxybutanoate	207.102	1	44963.1	0.444538	C04561; C04562; C10390; C10430; C10451; C15765; C16975; C17821; C17846	C12H16O3	-H(-)	100	381	207.102	VDARBCCMTDKLBW-ZJUUUORDSA-N	Benzenoids	3775	3529	3702	3669	11019	13899	12121	12664	13991	9279	11744	9613	9919	9215	10214	9435	10372	10252	12055	9124	11554	9715	8542	8827	9143	10483	9030	10047	9246	12560	12004	11225	11940	11737	8900	9826
382	4-Heptyloxyphenol	207.14	1	63130.8	0.26773	C14236	C13H20O2	-H(-)	100	382	207.14	HZBABTUFXQLADL-UHFFFAOYSA-N	Benzenoids	25326	13515	24052	13127	21743	22707	20494	24349	23965	21602	22241	21911	21762	22837	20941	23574	22023	22706	26248	20682	22830	22933	23692	23137	24055	25491	23539	24520	24061	24471	24685	26590	25686	25271	23023	25104
383	N-Acetyldemethylphosphinothricin	208.038	1	69157.1	0.955854	C17949	C6H12NO5P	-H(-)	100	383	208.038	VMEBCHDZEJWXIU-YFKPBYRVSA-N	Amino acids, peptides, and analogues	1117	119	1074	72	3079	3536	4954	4625	4600	5223	2890	5345	3820	4599	5504	6524	4797	6296	6477	3824	4755	6099	6703	4477	3095	3466	4615	2943	3055	3982	4329	4992	4621	4286	4843	4367
384	Tyr-OEt	208.099	1	27247.5	-0.29106	C01458; C12231; C14262; C14334	C11H15NO3	-H(-)	100	384	208.099	SBBWEQLNKVHYCX-JTQLQIEISA-N	Amino acids, peptides, and analogues	5294	4615	4830	4463	6977	8800	8619	9231	9419	8368	11075	7954	7486	8211	8462	8781	8454	8720	15651	7153	8201	9501	7960	7580	7221	8216	7551	8092	7366	8768	8937	7871	8450	8485	8045	7766
385	D-Glucarate	209.031	1	38198.7	0.874975	C00818; C00879	C6H10O8	-H(-)	89	385	209.031	DSLZVSRJTYRBFB-LLEIAEIESA-N	Carbohydrates and carbohydrate conjugates	1057	1183	977	1452	7256	6855	7048	7322	7141	7377	7230	7423	7460	8152	6953	7244	7132	8133	8610	5842	6630	7474	7456	6456	6812	6876	6166	5624	6808	6952	6578	6785	6990	7236	6452	7012
386	5-Hydroxyferulic acid methyl ester	209.046	1	73880.2	0.830227	C05619	C10H10O5	-H(-)	100	386	209.046	YFXWTVLDSKSYLW-NSCUHMNNSA-N	Phenylpropanoids and polyketides	1628	942	1450	1086	10916	10083	11248	13320	12044	15890	7526	15534	14824	16677	12696	17070	15154	17998	15566	10310	12702	12244	13889	12967	11625	11479	12463	8514	9743	10182	10987	11363	13566	11935	11699	13159
387	Sedoheptulose	209.067	1	253006	0.732479	C02076; C08236; C08355; C19612	C7H14O7	-H(-)	100	387	209.067	HAIWUXASLYEWLM-QTSLKERKSA-N	Carbohydrates and carbohydrate conjugates	175	292	161	343	17320	18948	17379	18145	19622	19630	19206	19294	18337	18928	20681	19947	20324	18690	23206	17060	18096	20858	18758	14738	16656	18157	17552	17106	16383	20241	18340	19141	20873	20079	18164	19994
388	Phosphoagmatine; Sinapyl alcohol	209.082	1	266320	0.714696	C02325; C02726; C07350; C10709	C11H14O4; C5H15N4O3P	-H(-); -H(-)	100	388	209.082	LZFOPEXOUVTGJS-ONEGZZNKSA-N	Benzenoids	69	1434	71	1623	10202	13089	10469	12023	17120	12619	14558	12569	13181	15051	16194	12561	14146	12174	14448	12730	12839	15424	12992	9903	10343	10988	12111	10403	10504	12744	11786	11448	12401	12841	14516	12561
389	(-)-Jasmonic acid	209.119	1	38270.3	0.736172	C08491; C16317	C12H18O3	-H(-)	100	389	209.119	ZNJFBWYDHIGLCU-HWKXXFMVSA-N	Lipids and lipid-like molecules	656	2502	529	2339	6752	7953	6673	8265	8023	6834	8282	7488	6769	6793	7488	7078	6899	7331	9430	5833	6647	7403	6982	6759	7011	6647	7063	6784	6203	8137	7573	7177	8240	7488	8594	8130
390	Thiotropocin	210.952	1	398697	0.821372	C12105	C8H4O3S2	-H(-)	79	390	210.952	DQGOJKVIMNNGAH-UHFFFAOYSA-N	Organoheterocyclic compounds	11225	7951	11246	3891	10202	11629	9466	11201	10640	20135	16009	10646	9839	8683	10901	11465	12141	11201	13644	9118	9775	13701	16667	8297	8903	15886	9254	10157	11093	8851	8959	9017	14672	8253	10287	10610
391	Danielone	211.061	1	55573	0.716884	C10674; C11155	C10H12O5	-H(-)	100	391	211.061	ZTBAPEIDNUHRNC-UHFFFAOYSA-N	Carbonyl compounds	3854	2115	3940	2483	15562	13948	13662	11209	10841	11543	17240	12232	15466	11067	12575	12401	10244	11396	11503	11353	10435	11443	11796	11274	13681	13545	14351	14754	16283	18360	14475	17886	18291	19870	7425	10711
392	7-Deoxyloganetin	211.098	1	36612.6	0.833706	C20790	C11H16O4	-H(-)	100	392	211.098	GGFAHFSRIITJIJ-NONSRLQASA-N	Lipids and lipid-like molecules	6411	6033	6371	6757	12634	13084	12281	11651	13017	11503	11862	11078	11029	11195	12239	12032	10921	11815	12219	11483	12058	11569	12381	11932	11461	11636	12696	12017	11464	13658	11789	13072	12679	12919	10294	11279
393	4-Cumylphenol	211.112	1	14519	0.873873	C14258; C14666	C15H16O	-H(-)	100	393	211.112	QBDSZLJBMIMQRS-UHFFFAOYSA-N	Benzenoids	3072	3100	2814	3022	6111	6172	5304	5907	5345	5812	6166	5041	6254	5997	6165	5829	5348	6649	6888	6178	5494	6107	5540	5814	5600	6621	6648	6060	6014	6415	5985	6128	6191	6550	5843	5200
394	Cucurbic acid	211.134	1	82141.7	0.729487	C08482; C08509; C16309; C16311	C12H20O3	-H(-)	100	394	211.134	LYSGIJUGUGJIPS-UOMVISFLSA-N	Lipids and lipid-like molecules	25670	26257	22695	28306	30004	34781	31269	30268	33303	32115	34553	30458	28807	28332	32566	28434	31434	32375	32222	32750	30621	26585	32478	31812	34175	30745	29915	33194	28421	31159	27661	29537	31653	29767	29495	28186
395	N,N-Dihydroxy-L-tyrosine	212.056	1	27748.2	0.907248	C15503	C9H11NO5	-H(-)	100	395	212.056	QPHSFUGCBGILSS-QMMMGPOBSA-N	Amino acids, peptides, and analogues	1692	1025	1958	1046	6497	5868	6650	6678	7088	6828	7099	7075	6698	7300	7116	7580	6678	7096	7799	6817	6874	7508	7102	6380	6769	7162	6705	6606	6708	7435	6503	7071	7384	7447	5832	6390
396	3-Oxododecanoic acid	213.15	1	40616.9	0.582939	C02367	C12H22O3	-H(-)	100	396	213.15	DZHSPYMHDVROSM-UHFFFAOYSA-N	Organic acids and derivatives	27061	23975	23721	25775	18435	18912	17103	18820	19062	17798	19756	18770	19577	20330	20351	19640	18786	19307	18404	20370	17498	19000	17611	20035	20809	19921	20143	20477	22026	20095	19102	20651	20069	17862	18378	18562
397	C13:0	213.186	1	78836.5	-0.0454452	C16640; C17076	C13H26O2	-H(-)	100	397	213.186	OWRHIIOUJRCXDH-LBPRGKRZSA-N	Lipids and lipid-like molecules	75944	65449	68067	76283	56682	55731	54985	57230	59177	52951	60300	48208	53247	54964	58034	49947	56417	54210	51866	53066	59448	54640	50522	53475	60795	59040	51362	58712	57306	56973	60270	52406	60147	53948	52339	58096
398	2-Amino-9,10-epoxy-8-oxodecanoic acid	214.109	1	8347.36	0.902707	C12027	C10H17NO4	-H(-)	100	398	214.109	PFDHVDFPTKSEKN-JAVCKPHESA-N	Amino acids, peptides, and analogues	1093	1217	898	1212	3306	3992	3353	3594	3334	3446	3853	3910	3109	3227	3308	3379	3568	3688	3592	2621	2952	3181	3612	3195	4305	4031	4161	3688	3929	5612	4121	4220	4360	4052	3306	3353
399	Ethyl 3-(N-butylacetamido)propionate	214.145	1	13569.3	0.887049	C18830	C11H21NO3	-H(-)	100	399	214.145	VZRKEAFHFMSHCD-UHFFFAOYSA-N	Organic acids and derivatives	2683	5476	2364	4373	5808	6315	5337	6831	5545	6572	7071	5673	4735	8263	4830	4817	4471	4704	5731	4716	4515	4614	5140	4892	5508	4288	4782	5528	3951	5605	4992	6578	4166	5158	4327	4381
400	2-C-Methyl-D-erythritol 4-phosphate	215.033	1	96564.9	0.853919	C11434	C5H13O7P	-H(-)	100	400	215.033	XMWHRVNVKDKBRG-UHNVWZDZSA-N	Organic acids and derivatives	4542	2116	4262	2090	30399	29647	23746	28317	31262	36045	29838	27933	23258	25483	27517	25689	29766	25348	38134	22022	23533	28678	27931	26465	25070	24599	22202	26217	21303	31339	23191	26190	26525	26369	23597	29710
401	12-Hydroxydodecanoic acid	215.166	1	16576.4	0.744702	C08317	C12H24O3	-H(-)	100	401	215.166	ZDHCZVWCTKTBRY-UHFFFAOYSA-N	Organic acids and derivatives	11247	9430	9942	9684	9549	9365	10086	10630	9654	9955	10550	8497	9216	10121	11780	9627	9536	10256	10791	9137	9365	9797	10292	10444	9420	9058	10487	9312	8500	10234	10569	9954	9440	9811	9637	8968
402	O-Propanoylcarnitine	216.124	1	10192.1	0.916087	C03017	C10H19NO4	-H(-)	100	402	216.124	UFAHZIUFPNSHSL-UHFFFAOYSA-N	Lipids and lipid-like molecules	937	1104	635	1492	2666	2873	3108	3479	3236	3103	3561	3889	2782	2504	2880	3135	3028	2702	3579	2429	2533	3334	3729	3643	3382	2966	3140	3658	3108	4352	2471	2732	3129	3069	2530	2723
403	gamma-L-Glutamyl-D-alanine	217.083	1	70552.8	0.93603	C03738	C8H14N2O5	-H(-)	100	403	217.083	WQXXXVRAFAKQJM-UHNVWZDZSA-N	Amino acids, peptides, and analogues	9383	14391	7734	19464	45891	46063	50849	61467	64427	59699	49234	51203	58408	65258	63289	59138	64376	75139	72616	48716	46605	48399	45275	46687	60278	54464	47563	55621	56210	46137	44352	44497	45335	46439	39725	45426
404	Pantothenate	218.103	1	53305.8	0.943215	C00864	C9H17NO5	-H(-)	100	404	218.103	GHOKWGTUZJEAQD-ZETCQYMHSA-N	Alcohols and polyols	58	238	45	269	5093	7292	4666	5086	5639	5509	7250	5657	5007	5644	5688	5693	5270	5411	5889	5424	5376	5915	6145	4582	4862	5415	5623	4983	4965	6042	5662	5973	5782	5865	5171	4533
405	Fabianine	218.154	1	2873.88	0.859701	C09949; C10171	C14H21NO	-H(-)	100	405	218.154	ZKWQRKACMGTYMH-JOYOIKCWSA-N	Organoheterocyclic compounds	763	1290	820	1445	1561	2238	1608	1876	2071	1774	2242	1616	1767	1856	2127	1801	1539	1865	1874	1560	2323	1820	2458	1518	1889	1699	1545	1924	1897	2212	1921	1922	1850	2276	1900	2360
406	2,6-Dioxo-6-phenylhexanoate	219.066	1	31389.1	0.93285	C03750; C09963	C12H12O4	-H(-)	100	406	219.066	WHAWELFEJQCZFJ-UHFFFAOYSA-N	Carbonyl compounds	1961	3248	1880	4164	6435	7312	6133	6355	6278	6557	7818	6264	6085	6298	6612	6113	6348	6234	7341	6268	5709	6149	6179	5840	6234	5880	5550	6333	5334	7119	6096	6124	6527	6080	6227	6427
407	Precocene II	219.104	1	38966.6	0.751741	C09018; C09928; C12263	C13H16O3	-H(-)	100	407	219.104	PTIDGSWTMLSGAH-UHFFFAOYSA-N	Organoheterocyclic compounds	2469	3391	2687	3819	9989	11900	8238	8538	8140	9780	12872	9183	9440	8596	8597	8720	8297	9241	9005	8072	8844	9218	9376	9080	9176	8629	8950	8299	8575	9187	9074	9423	9312	8860	9044	9311
408	Oblongolide	219.139	1	20940.4	0.801831	C09519; C09673	C14H20O2	-H(-)	100	408	219.139	ZSRQNNNSHRCNQE-HNRZYHPDSA-N	Organoheterocyclic compounds	10131	7850	10792	8646	11313	11820	12094	12044	12076	11413	11458	11851	10293	11539	12436	11079	9805	10379	11779	11070	11369	10842	12527	13159	10886	11486	11376	11370	11654	11333	11313	10432	10931	11569	10758	11272
409	7,8-Dihydroxykynurenate	220.025	1	23248.3	0.858757	C01111	C10H7NO5	-H(-)	100	409	220.025	TYPRWJJYCBNAQC-UHFFFAOYSA-N	Organoheterocyclic compounds	9156	8627	9035	9906	11971	12554	10152	10828	10965	10367	12799	10256	11210	11935	12345	10309	10728	12120	11928	11463	10460	12329	11882	9217	11422	12590	11935	10906	11014	14058	11507	12369	13063	13390	11074	11883
410	6-Hydroxyindolelactate	220.062	1	21166.7	0.781732	C05657	C11H11NO4	-H(-)	100	410	220.062	QVXYTCLWWRPFPW-UHFFFAOYSA-N	Organoheterocyclic compounds	3891	5821	3623	5247	7958	8661	6933	8051	8097	7929	9610	8208	7477	7657	7975	8007	9176	7907	8630	7585	7726	7915	8423	7909	8182	7742	7679	7607	7810	8188	7799	8105	8799	8095	7269	8329
411	Metaxalone	220.097	1	13007.6	0.845162	C07934; C13534; C14291	C12H15NO3	-H(-)	100	411	220.097	IMWZZHHPURKASS-UHFFFAOYSA-N	Benzenoids	733	1502	632	1465	4059	4310	3543	3729	4746	4395	4381	4318	4132	4157	4612	4280	3891	3989	4181	3994	4006	4698	4695	4363	3977	4054	4019	3674	3711	4720	3853	4573	4445	3744	3623	4171
412	2-Succinylbenzoate	221.046	1	43027.7	0.935415	C02730; C09271; C10496; C12264; C14106; C14107; C17479; C17480	C11H10O5	-H(-)	100	412	221.046	YIVWQNVQRXFZJB-UHFFFAOYSA-N	Carbonyl compounds	1403	2639	1431	2667	7473	8251	20907	6729	6739	9315	8765	6653	6053	6032	7674	7189	7158	6427	8140	6414	7251	6916	6545	5084	5588	5423	5178	5578	5272	5760	5843	5616	5885	5315	7094	6746
413	6-Acetyl-D-glucose	221.067	1	32353.1	0.937511	C02655	C8H14O7	-H(-)	100	413	221.067	ILLOJQCWUBEHBA-JAJWTYFOSA-N	Carbohydrates and carbohydrate conjugates	2729	4793	1630	3582	7133	6857	389829	7636	6816	26450	7827	5901	6314	5959	6635	6325	6847	5494	7651	5209	7271	6754	4888	4696	5049	4480	4790	4905	4934	5946	4668	4615	5243	4949	6757	7215
414	Apiole	221.083	1	49038.4	0.789079	C10429; C10449; C14175; C19228; C20225	C12H14O4	-H(-)	100	414	221.083	QQRSPHJOOXUALR-UHFFFAOYSA-N	Organoheterocyclic compounds	6550	6259	6688	5898	9154	9720	84318	9948	9091	13617	10312	8728	8872	8452	9925	9109	9255	9196	10153	9190	8952	9468	8786	8838	8738	7517	8493	8671	8179	9196	8497	8316	8907	8714	8929	8785
415	Dehydrovomifoliol	221.119	1	37663.7	0.175294	C02533; C04223	C13H18O3	-H(-)	100	415	221.119	JJRYPZMXNLLZFH-URWSZGRFSA-N	Lipids and lipid-like molecules	7805	2685	6775	2765	10807	12339	17795	11737	12851	11958	11600	11748	11032	10583	13014	12740	12699	12358	13732	11166	26594	12363	13020	11250	10650	11193	11430	11174	10215	12606	11476	12053	12726	12784	11591	11968
416	(2E,6E)-Farnesol	221.191	1	4373.74	0.908392	C01126; C03220; C09621; C09628; C09631; C09651; C09663; C09664; C09676; C09682; C09698; C09704; C09705; C16143; C16813; C16970; C17124; C18245; C19743; C19744; C19746; C19755; C19756; C19893; C19974; C20172; C20181; C20184; C20479; C20576	C15H26O	-H(-)	100	416	221.191	CRDAMVZIKSXKFV-YFVJMOTDSA-N	Lipids and lipid-like molecules	2913	2764	2510	2820	2205	3208	4701	3399	2718	3092	3142	2449	2587	2604	3286	3183	2813	2714	2342	2658	3633	3304	2943	3051	3087	2873	2717	3212	3078	2669	3297	2891	3141	2791	2807	3129
417	7,8-Dihydro-7,8-dihydroxykynurenate	222.042	1	29410.9	0.928127	C01249; C03147; C05645; C05652; C19686	C10H9NO5	-H(-)	100	417	222.042	LLAWHKBFIBTIBH-UHFFFAOYSA-N	Organoheterocyclic compounds	2133	1801	1869	2024	6906	4112	4861	4013	4251	4413	4808	3959	4134	4202	4286	4415	4126	4644	4785	4041	3468	4136	4056	3488	4000	4295	4290	4004	4124	4478	4083	4210	4275	4428	4075	3891
418	Bendiocarb	222.077	1	21217.9	0.935777	C14433; C18953	C11H13NO4	-H(-)	100	418	222.077	XEGGRYVFLWGFHI-UHFFFAOYSA-N	Organoheterocyclic compounds	1620	1092	1620	968	4454	5142	37474	3899	3882	4556	5718	3732	3504	3464	3912	3873	3658	4184	4174	3669	3609	3662	3999	3778	3722	4092	4714	4041	3838	4314	3807	4446	4297	4014	4006	4104
419	Cerulenin	222.114	1	9543.3	0.914253	C12058; C13138; C16704	C12H17NO3	-H(-)	100	419	222.114	GVEZIHKRYBHEFX-NQQPLRFYSA-N	Organoheterocyclic compounds	1186	713	941	629	2575	2549	3027	2770	2753	2362	2567	2472	2403	2488	2586	2612	2618	2463	2914	2352	5261	2823	2519	2444	2599	2515	2227	2529	2143	2698	2532	2652	2716	2628	2812	2615
420	Sinapate	223.062	1	1.29585e+06	0.387342	C00482; C20653; C20654	C11H12O5	-H(-)	100	420	223.062	PCMORTLOPMLEFB-ONEGZZNKSA-N	Phenylpropanoids and polyketides	2461	62	2046	65	23445	23703	30004	29147	29471	29850	21898	30429	26733	29687	31348	33579	30217	33065	35211	23889	29474	33149	33130	26888	24354	25885	27922	21792	23432	27117	28605	29883	29988	28476	28590	28887
421	L-(+)-Anaferine	223.182	1	15217.5	0.903011	C06183; C06521; C11358	C13H24N2O	-H(-)	100	421	223.182	JFMCQBGTUJUOAB-RYUDHWBXSA-N	Organoheterocyclic compounds	1236	69	1190	60	1575	1664	2981	3084	3017	2966	1453	3354	2448	3168	3426	3617	3330	3929	4769	1510	2738	4353	3173	2017	1974	2301	2489	1498	1985	2288	2839	2820	3032	2924	2235	2875
422	Ancitabin hydrochloride	224.068	1	160614	0.0608224	C13112	C9H11N3O4.	-H(-)	100	422	224.068	KZOWNALBTMILAP-JBMRGDGGSA-N	Organic oxygen compounds	1258	71	1230	83	6378	8831	7946	12693	13236	11222	8150	12106	9601	11023	14782	14872	13456	9914	15021	8386	6963	14924	13044	9092	9173	9259	11922	7895	8108	8491	7466	11149	12987	12179	6330	11958
423	2-[2-(4-Pyridinyl)-1-butenyl]phenol	224.109	1	14646.4	-0.0963235	C15043; C17019	C15H15NO	-H(-)	76	423	224.109	BHNJIESAHPLLFU-VAWYXSNFSA-N	Benzenoids	2983	419	2676	506	3403	3948	4986	5789	6006	5719	3980	5945	4928	5976	6677	7124	6374	6390	8857	3633	4866	7536	6160	4162	4453	4873	5256	3487	4113	4602	4905	5510	6191	5687	4031	5845
424	Prometon	224.152	1	4674.95	0.912098	C14186; C18768; C19106	C10H19N5O	-H(-)	100	424	224.152	ISEUFVQQFVOBCY-UHFFFAOYSA-N	Organoheterocyclic compounds	645	101	876	132	859	848	1426	1466	1485	1446	846	1574	1202	1477	1601	1668	1620	1825	2277	839	1326	2018	1458	1052	1068	1168	1217	761	989	1162	1375	1353	1480	1403	1146	1401
425	(2S)-Flavan-4-ol	225.092	1	39162.6	0.973149	C02345; C09757; C10276; C10325; C13632	C15H14O2	-H(-)	100	425	225.092	YTMFRMLVZQOBDR-WUJWULDRSA-N	Phenylpropanoids and polyketides	4001	8032	6552	3991	10134	12806	11837	13826	14250	13782	12479	13860	12906	13103	14897	15059	14926	13093	16817	10714	11961	16030	14245	11215	21386	13238	15332	17735	11392	12323	12216	13093	13921	14133	13130	13984
426	Butopyronoxyl	225.113	1	54545.2	0.845737	C19142	C12H18O4	-H(-)	100	426	225.113	OKIJSNGRQAOIGZ-UHFFFAOYSA-N	Organoheterocyclic compounds	17711	12314	18032	13055	14780	16435	16700	18040	18083	18281	18381	17374	16581	15971	18209	18960	17354	18322	20196	16632	17283	18081	18403	18281	17656	18502	20989	20869	16323	18193	18241	17684	18764	18264	16944	17610
427	C14:1	225.186	1	18827.1	0.437112	C08322	C14H26O2	-H(-)	100	427	225.186	YWWVWXASSLXJHU-WAYWQWQTSA-N	Lipids and lipid-like molecules	9325	12308	9161	11749	9737	8786	9842	9351	10840	8042	9272	7381	9155	8756	10913	9040	9090	9073	8833	8845	10262	9076	7679	8546	9982	10037	9042	10514	8340	8441	8568	8768	9847	8672	8085	10500
428	Pentadecanal	225.222	1	3697.62	0.86663	C01948	C15H30O	-H(-)	100	428	225.222	XGQJZNCFDLXSIJ-UHFFFAOYSA-N	Lipids and lipid-like molecules	1698	1909	1714	1469	2446	2540	2549	2311	2757	2731	2065	2252	2005	2347	2399	2388	2247	2363	2754	1960	1930	2357	2630	2768	2392	2110	2395	1724	1765	2254	2427	2152	2386	2131	2276	2382
429	3-Amino-4,7-dihydroxy-8-chlorocoumarin	225.992	1	60943.4	0.80197	C12469	C9H6ClNO4	-H(-)	23	429	225.992	IUKNBHUPGHNINH-UHFFFAOYSA-N	Phenylpropanoids and polyketides	29975	6295	25921	6908	25527	29577	22588	26321	28100	30692	26020	28570	28740	32232	27660	28327	26489	28506	30742	25204	28627	37175	36087	21791	29594	31101	27525	30482	30462	34947	34686	31332	34360	30512	27228	31636
430	5-(2'-Carboxyethyl)-4,6-dihydroxypicolinate	226.036	1	33482.5	0.947362	C05655; C06047; C06048	C9H9NO6	-H(-)	100	430	226.036	MEACACCQPBWCOO-UHFFFAOYSA-N	Organoheterocyclic compounds	5089	5430	4295	6208	16914	16287	15639	18199	18097	17462	18036	14893	14998	16002	17653	15038	17582	16049	18983	14814	16281	18348	17023	12946	15079	16239	15169	14735	14979	15884	14817	15251	15437	15372	14147	16259
431	L-Arogenate	226.072	1	25911.9	0.939497	C00826	C10H13NO5	-H(-)	100	431	226.072	MIEILDYWGANZNH-DSQUFTABSA-N	Amino acids, peptides, and analogues	2177	1551	2412	1467	7571	8038	9457	9601	9536	9820	7925	10451	8567	9587	10502	10671	10259	10972	11942	7703	8607	10758	10388	8535	8650	9390	9312	8079	8029	9464	8762	9333	9368	9236	8279	10286
432	2-Hydroxy-3-carboxy-6-oxo-7-methylocta-2,4-dienoate	227.057	1	45316.5	0.927711	C06581	C10H12O6	-H(-)	100	432	227.057	QIADQBIXDULDTJ-XYMCEGRYSA-N	Organic acids and derivatives	3322	4249	3164	5805	8327	9996	8238	8756	8801	9763	8673	8047	8530	7733	8856	8379	9424	8665	10496	7820	13043	9267	7886	7517	8389	7405	7818	8267	7902	8032	7307	7304	8890	8326	8224	8357
433	Mansonone C	227.108	1	55280.9	0.911117	C10371; C13624; C15210; C17424	C15H16O2	-H(-)	100	433	227.108	GREWJSSEUGRGIT-UHFFFAOYSA-N	Lipids and lipid-like molecules	7593	13266	6860	9236	9417	9997	10082	11126	10562	11249	11534	10893	10964	9297	10062	9569	11223	11025	11002	9556	9098	9466	8585	9116	13145	9240	12215	11667	10040	10532	11711	10498	10467	10027	8587	11040
434	Traumatic acid	227.128	1	60853.3	0.665828	C16308	C12H20O4	-H(-)	100	434	227.128	MAZWDMBCPDUFDJ-VQHVLOKHSA-N	Lipids and lipid-like molecules	12503	15078	12905	15459	16303	19136	15594	17600	16022	16697	17646	14885	15837	16661	17333	16321	16334	16311	16210	15889	15977	15515	14308	17884	17974	16560	18070	17729	15951	17531	15489	16460	15893	16138	16745	15396
435	C14:0	227.201	1	233760	0.276608	C06424	C14H28O2	-H(-)	100	435	227.201	TUNFSRHWOTWDNC-UHFFFAOYSA-N	Lipids and lipid-like molecules	252854	144331	148462	274392	109962	124702	117711	117794	115530	103564	123616	116978	118976	147957	135158	126882	138489	123067	111910	112173	115982	110843	98127	110511	188656	147147	115288	170697	150665	117140	114906	106631	148848	114200	127984	138900
436	Dehydrocostus lactone	229.125	1	23263.6	0.939374	C09387; C09406; C09658; C15134; C16943; C16960; C16988; C17885; C17913	C15H18O2	-H(-)	56	436	229.125	NETSQGRTUNRXEO-XUXIUFHCSA-N	Lipids and lipid-like molecules	2065	1190	2043	1458	5059	4449	4611	4020	4214	4018	4091	3969	3994	3322	4227	4075	3574	4499	4687	3545	4033	3599	4190	5140	4040	3555	3540	3844	3179	4317	4003	5116	4422	4470	3860	4923
437	Lenacil	233.129	1	25252.8	0.81751	C11200; C18326	C13H18N2O2	-H(-)	100	437	233.129	ZTMKADLOSYKWCA-UHFFFAOYSA-N	Organoheterocyclic compounds	2765	2977	2303	3084	5826	6267	5751	5545	6384	5888	6102	6210	5517	6136	6367	6868	6115	5924	7034	5762	5566	6070	6657	5670	6461	5510	6355	5986	5814	6778	5940	5597	6528	5973	6212	6464
438	Bakkenolide A	233.155	1	156915	-0.274595	C09350; C09376; C09399; C09409; C09677; C09686; C09712; C09721; C09739; C09743; C16942; C16949; C17090; C17489; C17491; C17492; C17504; C17609; C19678; C20309; C20404	C15H22O2	-H(-)	100	438	233.155	OVXAYHNZXBOVPV-QMGNLALYSA-N	Lipids and lipid-like molecules	117499	110511	115033	115169	122318	120172	115431	123503	116303	115801	116668	114172	110628	119802	128276	117113	130579	116309	124907	116949	119775	123847	119163	110212	139018	125803	114953	132828	129213	120322	118790	113735	118668	113998	122943	126795
439	1,3-Benzenedisulfonamide	234.985	1	14556.1	0.873407	C14182	C6H8N2O4S2	-H(-)	100	439	234.984	HUYYFHGIHVULSU-UHFFFAOYSA-N	Benzenoids	3130	4965	2792	6369	6925	5152	6218	7328	8162	6636	7584	6351	5841	6630	7706	6558	7197	6597	9290	5670	6660	7721	6953	5492	6242	6511	5742	6702	5535	6184	5596	5652	6052	5809	6228	6678
440	Isosorbide dinitrate	235.02	1	20378.4	0.452894	C07456	C6H8N2O8	-H(-)	98	440	235.02	MOYKHGMNXAOIAT-JGWLITMVSA-N	Organoheterocyclic compounds	6119	6706	3416	6121	6296	6990	6382	7729	7794	7249	7520	7623	7385	5815	7594	6796	7527	6584	8142	7105	6160	7996	7474	7868	7130	7092	7279	7645	6641	8489	6621	7900	7541	7542	6615	7308
441	2-Carboxy-2-hydroxy-8-carboxychromene	235.026	1	43806.6	-0.281489	C14094; C14095	C11H8O6	-H(-)	100	441	235.026	QTUUVCOZQOTVCR-UHFFFAOYSA-N	Organoheterocyclic compounds	16929	19664	16709	21619	21943	21841	21059	21717	23373	22213	22466	20441	21662	20821	23121	20791	23897	22423	22570	21218	22189	20133	20398	19911	20292	21258	19818	19996	20241	21506	20874	20174	22226	22854	20205	22999
442	5,6,7-Trimethoxycoumarin	235.061	1	58525.1	0.956199	C09313; C09958	C12H12O5	-H(-)	100	442	235.061	FOBNRKTURPWTQX-UHFFFAOYSA-N	Phenylpropanoids and polyketides	397	2324	403	2499	5112	5329	5320	6464	7830	6428	7555	6349	7449	7359	7701	6783	6489	5882	6844	6795	5801	6194	7134	4768	5352	5205	6790	5113	4502	5890	5332	5229	5389	6269	7786	5886
443	3-Dimethylallyl-4-hydroxymandelic acid	235.099	1	35126.5	0.953948	C12457	C13H16O4	-H(-)	82	443	235.099	VBHJEUYYPUPECH-UHFFFAOYSA-N	Benzenoids	2487	2378	2271	2274	6212	7352	5988	6251	6529	7120	7006	6393	5605	6570	6883	6640	6076	6833	7571	6159	5570	6591	6612	6290	6303	6399	6094	6461	6291	6942	5892	6401	6540	6079	6486	6701
444	4-Heptyloxybenzoic acid	235.135	1	32356.1	0.497488	C14274; C14718	C14H20O3	-H(-)	100	444	235.135	ZRVIYEJYXIDATJ-UHFFFAOYSA-N	Benzenoids	3553	3046	3314	3660	9918	10206	9164	9160	10108	9934	11221	9385	8083	8884	9002	10255	8868	9722	10294	9767	8692	9367	9361	9620	9258	8734	8601	8647	8436	10311	9499	9893	10070	9758	9558	9152
445	Latia luciferin	235.171	1	60680.9	-0.407909	C02293; C09627; C09678; C09681; C09700; C09733; C16502; C16946; C17493; C17604	C15H24O2	-H(-)	100	445	235.171	MJURCEOLOMHLAX-ZRDIBKRKSA-N	Organic acids and derivatives	38523	38412	38772	41545	31510	33609	32110	35889	34091	30830	33934	34492	33776	39361	34911	33809	37637	33694	33895	29952	30478	32344	29870	31592	43715	40689	34205	41662	40173	33609	33987	30195	33612	34751	34386	37345
446	Bombykal	235.206	1	3093.28	0.882831	C20128	C16H28O	-H(-)	100	446	235.206	OSFASEAZCNYZBW-SCFJQAPRSA-N	Lipids and lipid-like molecules	1231	1146	1253	1131	1596	1795	1964	1811	1483	1997	1841	1757	1658	1930	1742	1968	1681	1674	1883	1843	1649	1707	2154	2413	1749	1775	1751	1703	1614	1650	1991	1649	1768	1856	2078	1491
447	Hexadecenal	237.221	1	2455.95	0.817415	C06123; C16873	C16H30O	-H(-)	100	447	237.221	KLJFYXOVGVXZKT-CCEZHUSRSA-N	Lipids and lipid-like molecules	1423	911	1173	1295	1198	1747	1601	1524	1464	1373	1666	1512	1399	1686	1226	1502	1500	1343	1634	1398	1656	1251	1842	2000	1400	1112	1526	1468	1289	1458	1400	1555	1777	1345	1556	1287
448	L-Cystine	239.016	1	394813	0.603178	C00491; C01420	C6H12N2O4S2	-H(-)	100	448	239.017	LEVWYRKDKASIDU-IMJSIDKUSA-N	Amino acids, peptides, and analogues	8783	28037	8522	34471	57208	65195	60531	66153	77909	67360	78520	64273	78943	73993	75632	62669	75746	71757	72006	65591	70797	63195	62207	48997	61507	61907	73613	62996	64020	63096	62104	55643	55644	62808	66343	64222
449	2-Hydroxyamino-1-methyl-6-phenylimidazo[4,5-b]pyridine	239.093	1	57264.4	0.896072	C20286	C13H12N4O	-H(-)	78	449	239.093	DCVWQAGUQFBCTF-UHFFFAOYSA-N	Organoheterocyclic compounds	8589	9590	7916	10977	13404	14101	12798	14100	15050	14153	15668	12886	13518	13136	14144	13365	13923	13940	15883	13685	21693	14162	12628	13311	13580	13705	14204	14205	13720	14533	12990	12242	13255	14271	13549	14418
450	Lapachenole	239.107	1	25763.7	0.901398	C09950; C14234; C15131; C17021; C19124	C16H16O2	-H(-)	100	450	239.107	BFGQXXNDFKWDMA-UHFFFAOYSA-N	Organoheterocyclic compounds	2794	2627	2186	2213	6075	6399	6567	6227	6173	7080	7043	5356	5059	5167	6916	7305	6357	6231	7273	5745	5966	7033	6777	5922	6132	5961	5692	5440	6103	7214	4722	6619	6747	6839	5053	5781
451	Homocarnosine	239.113	1	18660	0.867256	C00884; C01262; C04138	C10H16N4O3	-H(-)	34	451	239.113	CCLQKVKJOGVQLU-QMMMGPOBSA-N	Organic acids and derivatives	2428	2915	2486	2388	5469	4987	4681	4864	5155	5156	5259	4204	5408	5251	5218	4773	5151	5274	5619	4548	5721	5242	4899	5265	5423	5087	5237	4892	5035	6303	4638	5089	5066	5484	5078	5088
452	Dehydrofalcarinone	239.144	1	13939.2	0.748934	C08445	C17H20O	-H(-)	100	452	239.144	HLHBDMWPPKHNDQ-KHPPLWFESA-N	Carbonyl compounds	3444	3260	3693	3536	5279	6108	5272	5320	5997	5318	5688	5153	4781	5027	5396	5255	5385	5771	5860	5421	5546	4966	5880	5458	5484	5397	5125	5240	5603	5971	5725	5639	5642	5966	5397	6164
453	C15:1	239.202	1	24326.4	0.514074	C17676	C15H28O2	-H(-)	100	453	239.202	LKKDASYGWYYFIK-QHSBEEBCSA-N	Lipids and lipid-like molecules	4467	11025	4474	10162	7774	8556	7414	7579	9936	7697	7918	6293	7896	7072	8775	7985	7983	6821	7135	8821	9576	7263	7154	8380	9245	8712	7513	8483	7471	8266	7814	8602	9836	7637	8605	10225
454	N-(2,3-Dihydroxybenzoyl)-L-serine	240.051	1	42413.6	0.972086	C04204	C10H11NO6	-H(-)	100	454	240.051	VDTYHTVHFIIEIL-LURJTMIESA-N	Benzenoids	2130	1746	2224	1723	9943	6117	8012	10916	10977	9422	11111	11033	9153	8821	10709	9893	12202	10225	13325	9389	11688	11697	9820	7046	10783	9838	10299	9815	9325	9934	7930	7901	8725	9253	8580	10749
455	Valeroidine	240.161	1	3640.55	0.877328	C10869	C13H23NO3	-H(-)	100	455	240.161	APLLVFVOTXZBFO-RUJICJSRSA-N	Alkaloids and derivatives	1301	1193	913	976	1553	1363	1372	1777	1822	1420	1961	1424	1447	1810	1865	1735	1709	1701	1533	1626	1594	1350	1429	1722	1620	1724	1884	2031	1561	2041	1541	1966	1537	2173	1634	1848
456	Thymidine	241.083	1	83852.1	0.768365	C00214; C19431	C10H14N2O5	-H(-)	100	456	241.083	IQFYYKKMVGJFEH-XLPZGREQSA-N	Nucleosides, nucleotides, and analogues	13205	19001	11181	25109	24322	25616	22580	26716	26870	27080	29500	26243	27675	27514	27722	26253	28588	26848	30147	23304	32611	23678	25201	24685	24105	26190	25907	24317	27366	26203	24562	23894	22264	24675	23806	23007
457	Bisphenol B	241.122	1	53058.4	0.932722	C14225; C14898; C15069; C15278	C16H18O2	-H(-)	72	457	241.122	HTVITOHKHWFJKO-UHFFFAOYSA-N	Benzenoids	10499	16487	8716	11195	14799	16049	14991	16357	16919	19739	16698	19147	20114	15449	16402	14540	19995	17520	17464	16076	15341	14919	14053	16666	43311	15714	40572	18791	16116	23919	19751	18885	16526	16532	14749	15015
458	C15:0	241.217	1	156762	0.379078	C16537; C16665	C15H30O2	-H(-)	100	458	241.217	WQEPLUUGTLDZJY-UHFFFAOYSA-N	Lipids and lipid-like molecules	153688	112813	96670	244807	80901	87942	81464	80019	91772	73394	85957	78328	80999	88771	90201	85514	88925	85367	75582	77834	91918	78402	73546	82079	117748	95716	84455	111991	93193	81488	88251	85164	122093	77257	94223	106593
459	Cytidine	242.078	1	121466	0.85803	C00475; C02961; C05711	C9H13N3O5	-H(-)	100	459	242.078	UHDGCWIWMRVCDJ-XVFCMESISA-N	Nucleosides, nucleotides, and analogues	437	2082	507	1955	17692	23204	15897	16957	20746	24297	32494	19974	20205	21381	21302	19517	23208	19626	24874	19606	21709	18897	19302	15640	20062	21776	20662	19193	20219	25285	19992	17948	18222	19128	18035	20131
460	L-Fuculose 1-phosphate	243.028	1	33389.7	0.971992	C01099; C01131; C02985; C06369	C6H13O8P	-H(-)	100	460	243.028	KNYGWWDTPGSEPD-LFRDXLMFSA-N	Carbohydrates and carbohydrate conjugates	3037	7983	3141	8734	10729	11893	12188	11359	12869	13201	13067	10759	10329	10696	12378	10755	13515	11681	13277	10324	12423	11695	11316	9662	11499	10613	11450	10790	11683	10607	9745	8401	9872	10897	9814	10595
461	CGP 52608	243.037	1	33588.6	0.749841	C15629	C8H12N4OS2	-H(-)	100	461	243.037	DDYJDIHOSRTMSE-FLIBITNWSA-N	Organic nitrogen compounds	3315	5875	3201	6320	14017	11825	14332	12925	14594	13126	16615	11681	13286	12105	12292	11809	13884	13124	14800	12122	13247	10337	11069	10820	13722	12469	12500	12914	12624	11983	11304	11149	11894	12300	9666	11787
462	Arnebinol	243.139	1	22002.4	0.899858	C09917; C10351	C16H20O2	-H(-)	100	462	243.139	BSXTWYDVYNXVHH-YKNDAMCPSA-N	Organic oxygen compounds	3280	2566	2757	2677	4922	5514	5203	5814	5484	6497	6148	5598	4919	5471	5325	6712	4320	6080	6841	5363	5331	5326	6237	7031	5378	4591	6423	6132	5279	6957	5361	5531	5547	5486	5848	5339
463	2S-Hydroxytetradecanoic acid	243.196	1	15123.5	0.794718	C13790	C14H28O3	-H(-)	100	463	243.196	JYZJYKOZGGEXSX-ZDUSSCGKSA-N	Lipids and lipid-like molecules	9921	7584	6415	7715	6228	7077	7813	6788	7256	7083	7290	6532	6603	6615	6785	6889	7354	6846	6446	6027	6063	5872	5850	6863	6937	6433	7464	6477	6457	6401	6452	6135	7058	6132	7339	6738
464	Isovalerylcarnitine	244.156	1	15958.3	0.92923	C20826	C12H23NO4	-H(-)	100	464	244.156	IGQBPDJNUXPEMT-UHFFFAOYSA-N	Lipids and lipid-like molecules	777	2224	811	1823	2530	2705	2233	2963	2904	3776	3449	2852	2738	2730	3182	2531	2717	2930	3000	2199	2838	3034	2232	2672	3726	3173	3373	2687	2589	2611	2462	2927	3057	2613	2209	2607
465	Isopimpinellin	245.046	1	80225.1	0.892795	C02162; C06355; C09285	C13H10O5	-H(-)	100	465	245.046	DFMAXQKDIGCMTL-UHFFFAOYSA-N	Phenylpropanoids and polyketides	529	352	470	371	10632	10720	7297	6349	7203	8118	10706	6474	5703	6234	9808	10030	8610	8248	11556	7391	8204	6177	9469	5388	3213	3692	3862	3243	2880	5329	4086	4182	4820	3696	9536	7847
466	Geranylhydroquinone	245.156	1	38444.2	0.92535	C10793	C16H22O2	-H(-)	37	466	245.156	ZSCRTFONTNMQBL-NTUHNPAUSA-N	Lipids and lipid-like molecules	2507	142	1630	149	3011	4503	2294	4693	3746	7088	2919	4431	2408	2200	3655	5455	4629	3615	4751	3784	3587	2049	5827	11084	3509	4238	5545	3752	3486	3198	1397	1886	3062	2149	3481	4014
467	N-Succinyl-L-glutamate	246.062	1	23380.3	0.950476	C05931	C9H13NO7	-H(-)	100	467	246.062	JCNBNOQGFSXOML-YFKPBYRVSA-N	Amino acids, peptides, and analogues	814	560	763	568	2831	2713	2695	3195	3421	3487	2981	3321	3643	3590	3924	4095	3608	3758	3933	3319	3616	3581	3538	2547	2962	3529	3170	2809	2980	2877	2562	2509	2728	2621	3151	2881
468	Lycopodine	246.186	1	1708.64	0.984696	C09883; C17091	C16H25NO	-H(-)	100	468	246.186	BCZFSDNVXODRAJ-JTTNIQEDSA-N	Lipids and lipid-like molecules	430	135	290	166	648	620	552	727	740	858	639	779	593	567	720	804	726	682	901	636	702	467	770	1433	563	600	834	579	619	611	453	581	667	574	679	619
469	Prenyl caffeate	247.097	1	32948.1	0.884353	C10487; C12456; C16788; C20426	C14H16O4	-H(-)	100	469	247.097	TTYOHMFLCXENHR-GQCTYLIASA-N	Phenylpropanoids and polyketides	1417	2077	1341	2040	7406	6887	7541	7936	8384	8891	8070	8068	10309	10476	8247	6727	5138	7491	9233	7966	5746	7577	7682	7194	7540	7189	7222	7009	6403	7308	5098	6596	6634	7065	5403	6745
470	1,2-Dihydrosantonin	247.134	1	20975.4	0.912611	C02771; C07609; C09301; C09345; C09378; C09386; C09440; C09488; C09507; C09534; C09537; C09544; C09556; C09562; C09626; C09660; C09687; C13455; C17887; C20400	C15H20O3	-H(-)	100	470	247.135	TYHGCPJCCQBRMP-BOCCBSBMSA-N	Lipids and lipid-like molecules	1862	1374	1774	1392	3319	4216	3611	3473	3394	3629	3610	3428	2947	3387	3778	3752	2953	3693	3883	3306	3059	3479	4085	3749	3634	2926	3150	3314	3057	3985	3598	3626	3505	3892	3604	3450
471	Sterol	247.206	1	4978.43	0.913258	C00370; C02799; C16343	C17H28O	-H(-)	100	471	247.207	FPXSXMFOYWRHDX-UHFFFAOYSA-N	Lipids and lipid-like molecules	961	134	1081	141	1731	2025	1075	2045	1745	2870	1568	1982	1115	1038	1553	1843	2106	1403	2037	1341	1673	827	1532	3699	2098	2175	1893	2060	1772	1437	849	818	1266	887	1337	2090
472	S-Acetyldihydrolipoamide	248.078	1	26721.3	0.904218	C01136	C10H19NO2S2	-H(-)	100	472	248.078	ARGXEXVCHMNAQU-UHFFFAOYSA-N	Lipids and lipid-like molecules	1967	1958	1470	1378	6353	6344	5942	6683	7340	7100	5635	6576	7012	8180	7307	7385	6163	7084	7552	6207	6819	7129	6450	5764	6312	7087	6212	6091	6219	7540	6509	6179	6826	6308	6198	6110
473	2-Hydroxy-6-oxo-6-(2-hydroxyphenoxy)-hexa-2,4-dienoate	249.041	1	49576	0.909574	C07734	C12H10O6	-H(-)	100	473	249.041	CULGWEQEASHZHP-NINQLNBYSA-N	Benzenoids	4792	5783	4396	5806	5881	6537	5099	5867	5345	6239	6371	5449	5913	5491	6036	5742	5679	6166	6077	5973	6174	5811	5774	5484	5972	5699	5616	5481	5286	6017	5204	5728	5489	5011	5475	5988
474	Citrinin	249.077	1	42396.3	0.962439	C16765	C13H14O5	-H(-)	100	474	249.077	CQIUKKVOEOPUDV-IYSWYEEDSA-N	Organoheterocyclic compounds	3584	7009	2949	7304	10096	10553	9916	10789	10447	10273	10045	10134	9257	9924	10549	9874	10756	10601	11303	9144	9907	10605	10843	9044	8821	7922	8972	9167	8832	10380	9175	9225	9585	9137	9752	9041
475	Diisopropyl phthalate	249.114	1	33226.1	0.885142	C14468; C14469	C14H18O4	-H(-)	100	475	249.114	QWDBCIAVABMJPP-UHFFFAOYSA-N	Benzenoids	3189	3467	2734	3048	5896	5929	5284	5167	5324	5272	6598	5192	4891	5272	5352	5350	5419	5600	6654	5235	6289	5373	6152	6108	5749	5204	5734	5812	4676	5610	5918	5817	5238	5540	5699	5736
476	N-Caffeoylputrescine	249.124	1	15883.8	0.521524	C03002; C17725	C13H18N2O3	-H(-)	100	476	249.124	KTZNZCYTXQYEHT-GQCTYLIASA-N	Phenylpropanoids and polyketides	1292	1039	1052	1105	2659	2895	2595	2804	2524	3166	2854	3009	2509	2702	3277	3246	2668	3123	3493	3015	3432	3012	3739	3518	3151	3012	3343	3039	2347	3081	5948	3174	2534	2757	3523	2833
477	(R)-4'-Deoxyindenestrol	249.128	1	14588.4	0.803447	C14541; C14542; C14543; C14544	C18H18O	-H(-)	100	477	249.128	JVJKQJFQEQRNRY-GFCCVEGCSA-N	Benzenoids	1238	967	858	1002	2817	2724	3099	2701	2655	3163	2679	3058	2558	2687	3099	3150	2561	3426	3322	3068	4280	2697	3929	3596	2987	2978	3115	2981	2265	3186	3386	3448	2588	2909	4321	2851
478	Gemfibrozil	249.15	1	51133	-0.0780177	C07020; C09295; C09689; C09711; C09748; C13453; C13456; C14716; C20403; C20405	C15H22O3	-H(-)	100	478	249.15	HEMJJKBWTPKOJG-UHFFFAOYSA-N	Benzenoids	19322	8370	18498	7563	18266	20361	16709	18457	18078	18655	18421	15320	15953	17035	23920	20882	15958	20178	25000	23821	41088	17246	25811	23923	27151	27971	20195	21882	14169	17885	18754	28493	19194	16035	22845	25397
479	C16:3	249.186	1	88104.6	0.937377	C16503	C16H26O2	-H(-)	100	479	249.186	NWKXNIPBVLQYAB-VDQVFBMKSA-N	Lipids and lipid-like molecules	3489	451	3913	535	2833	4953	5049	2744	2598	7204	2189	5859	3306	3415	4858	9546	3997	5359	3752	12281	8935	6009	17477	11068	4470	3770	10344	3256	2079	3247	3288	5182	3633	3042	15973	2887
480	N-Feruloylglycine	250.073	1	23682.3	0.939797	C02564	C12H13NO5	-H(-)	100	480	250.072	CLGNQAIRBLDHIN-HWKANZROSA-N	Amino acids, peptides, and analogues	626	1101	649	1431	3470	4431	4114	3922	4204	4520	4775	4197	3851	4179	4284	4370	4215	4175	4466	3730	3881	4144	4122	3714	3933	4040	4045	3571	3589	4130	4011	3811	4166	3690	4565	3926
481	Ac-Tyr-OEt	250.108	1	11356.3	0.908691	C01657	C13H17NO4	-H(-)	100	481	250.108	SKAWDTAMLOJQNK-LBPRGKRZSA-N	Amino acids, peptides, and analogues	670	1109	632	945	2319	2413	2432	2477	2561	3612	2534	2776	2848	2568	2671	2930	2331	2735	2842	2372	2165	2165	2812	2424	2509	2721	2858	2661	2336	2857	2263	3427	2569	2712	2416	2338
482	Pumiliotoxin 251D	250.218	1	1595.83	0.876968	C20031	C16H29NO	-H(-)	100	482	250.218	OKTQTXDNHCOLHT-AJKPHIATSA-N	Alkaloids and derivatives	466	81	359	118	379	584	609	366	369	872	291	726	418	384	522	1042	414	609	419	1293	985	695	1914	1115	487	440	1152	410	270	376	448	493	449	357	1600	379
483	Pyrithione zinc	250.996	1	14317.7	0.925309	C13427	(C5H4NOS)2.	-H(-)	100	483	250.996	PICXIOQBANWBIZ-UHFFFAOYSA-N	Organoheterocyclic compounds	2341	2969	2440	2949	5869	5729	4283	4747	5169	4742	6513	4281	4412	4389	4153	4202	5012	5253	5596	4225	4443	4255	4480	4373	5653	5770	5133	5138	5883	6401	6238	6552	7030	8056	4010	4612
484	Trinexapac-ethyl	251.093	1	45837.5	0.940504	C18541; C20207	C13H16O5	-H(-)	100	484	251.093	RVKCCVTVZORVGD-QXMHVHEDSA-N	Organic acids and derivatives	4759	4775	5264	5123	8276	7921	10726	8601	8626	9333	8539	8459	7495	7869	9104	8774	9067	8943	10108	7749	8186	8582	8715	8113	7662	7439	8418	7864	6892	8826	7624	7595	8079	8164	8165	8373
485	Cuauhtemone	251.165	1	34225.6	-0.316816	C09645; C16504; C17502; C17605; C17607; C17612	C15H24O3	-H(-)	100	485	251.165	JYWBCQDZTOFWOI-TUVASFSCSA-N	Lipids and lipid-like molecules	13821	16592	15021	16462	16695	18725	17388	17405	16545	17174	16880	17139	16084	16816	17747	14825	15893	17823	16978	16714	18491	15766	17904	18933	19085	17231	18623	16490	17156	17911	16999	16777	18291	16090	18936	17465
486	C16:2	251.202	1	14576.7	0.88876	C16795	C16H28O2	-H(-)	100	486	251.202	SRELFLQJDOTNLJ-HNNXBMFYSA-N	Lipids and lipid-like molecules	1359	811	1369	815	2823	4007	3610	3184	2595	5616	2055	4956	2575	2563	3726	6268	3371	4314	3212	7064	6268	4228	9962	7547	3210	2980	6426	2634	2315	2824	2460	3357	2990	2566	9377	2750
487	3-beta-D-Galactosyl-sn-glycerol	253.093	1	67436.2	0.964368	C05401; C11546	C9H18O8	-H(-)	100	487	253.093	NHJUPBDCSOGIKX-NTXXKDEISA-N	Lipids and lipid-like molecules	920	253	824	303	5083	5186	4929	6605	6893	7758	4380	5892	4691	4326	5637	5743	9600	4872	6893	4610	4185	4235	7208	11969	7824	9816	10143	9304	8473	3844	2747	3256	3538	2898	5224	3902
488	Kikkanol A	253.179	1	13989.3	0.860063	C17603; C17606; C17608; C17610; C18538	C15H26O3	-H(-)	50	488	253.179	NFDGWGXWJZESMB-QRTUWBSPSA-N	Lipids and lipid-like molecules	2927	3798	3089	3627	6104	6795	5765	5868	5874	4293	4745	4555	3480	3943	4910	4441	4940	4015	5432	4115	4881	6160	4885	8852	5233	4644	6167	4649	4233	7237	5138	5377	6734	5407	5766	4592
489	(9Z)-Hexadecenoic acid	253.216	1	88121.7	0.213641	C08362	C16H30O2	-H(-)	100	489	253.216	SECPZKHBENQXJG-FPLPWBNLSA-N	Lipids and lipid-like molecules	10242	13718	10520	15007	36084	66650	33801	38404	40417	27668	21864	25305	10596	11553	23109	19101	19271	14427	30655	21235	30155	47370	29605	57989	22080	19668	44633	33106	15512	50537	34609	39403	50084	34264	37543	27576
490	5-(3'-Carboxy-3'-oxopropyl)-4,6-dihydroxypicolinate	254.031	1	25731.5	0.923536	C05656	C10H9NO7	-H(-)	100	490	254.031	VWBAKCRPXQBUFQ-UHFFFAOYSA-N	Organoheterocyclic compounds	2470	1896	2159	2461	3428	3280	2685	3040	3143	3408	3700	2796	2887	2868	2753	2713	3275	3010	3855	2661	2981	3085	2849	2522	3172	3006	2997	2868	3221	3426	2871	3213	3300	3418	2703	2834
491	Phenylgalactoside	255.088	1	61026.8	0.951623	C02578; C03097; C11611	C12H16O6	-H(-)	100	491	255.088	NEZJDVYDSZTRFS-YBXAARCKSA-N	Carbohydrates and carbohydrate conjugates	5431	5320	4940	7145	9648	10047	10315	10908	11446	10157	9563	9138	8374	8427	9679	9152	9661	9224	11625	9111	9422	10504	9662	10195	10144	9084	9371	10407	9318	10286	8802	9436	10275	9695	9792	9022
492	(+)-Elaeocarpine	256.134	1	11759.4	0.57402	C10591; C12243	C16H19NO2	-H(-)	100	492	256.134	DXTYYNIKCKARPP-UXIGCNINSA-N	Organoheterocyclic compounds	2315	2559	1905	2512	3287	3482	3118	3517	4970	3954	4397	3786	3474	3367	3944	3142	3284	3657	3836	3046	3163	3469	3373	3910	5201	3905	5843	3902	3755	4092	3684	3741	3404	3913	3145	3227
493	Heritonin	257.118	1	39141.6	0.970393	C09936; C10271; C18134	C16H18O3	-H(-)	100	493	257.118	CEVWVTGBJBHAMO-CLAHSXSESA-N	Lipids and lipid-like molecules	2132	2030	2111	2249	4524	4906	4061	5008	4392	4696	5224	4398	4030	4611	4412	4305	4280	4516	5702	4155	4190	4562	4845	4997	4883	4646	5608	4431	4234	6106	5202	5378	4614	4855	4601	4574
494	Cicutoxin	257.155	1	78967.8	0.914452	C08402; C20044	C17H22O2	-H(-)	100	494	257.155	FQVNSJQTSOVRKZ-JNRDBWBESA-N	Lipids and lipid-like molecules	4764	3036	4557	4021	5737	5810	5651	5582	5576	6603	6029	6785	5655	5954	6144	6522	5299	6750	7254	5758	5122	6370	7567	7065	5868	6624	5968	5884	5189	7230	6376	6473	6214	6589	6287	6233
495	Hexose P	259.022	1	113300	0.752832	C00085; C00092; C00103; C00275; C00446; C00636; C00663; C00668; C01002; C01094; C01097; C01113; C01171; C01172; C01177; C02888; C02962; C02965; C03251; C03267; C03384; C03546; C03606; C03654; C03735; C03811; C04006; C05001; C05345; C06019; C06155; C06312; C15924; C15926; C18096	C6H13O9P	-H(-)	100	495	259.022	BGWGXPAPYGQALX-VRPWFDPXSA-N	Carbohydrates and carbohydrate conjugates	629	993	595	1172	17246	13801	19211	13166	14194	17628	19670	14326	12327	12722	17957	18544	16076	17850	16465	13152	13540	9569	13848	11148	13613	13242	11949	11932	9821	14137	14430	14514	14085	10471	25215	24081
496	Khellin	259.061	1	38765.8	0.957798	C09010	C14H12O5	-H(-)	100	496	259.061	HSMPDPBYAYSOBC-UHFFFAOYSA-N	Organoheterocyclic compounds	1017	1314	1133	1456	4166	4015	4417	4176	4242	4227	5149	3920	3802	3966	4567	4545	4629	4683	4983	3586	3936	3993	3946	3619	4134	3764	3746	3755	3545	4204	3714	3750	4050	3533	4610	4815
497	Lacinilene C 7-methyl ether	259.134	1	38175.4	0.93316	C09695; C17744; C18135	C16H20O3	-H(-)	100	497	259.134	VMEKKHYIQYOLHA-MRXNPFEDSA-N	Lipids and lipid-like molecules	2173	6584	2126	2757	7958	8548	7147	8643	8188	9467	9306	10742	8846	7288	8117	8117	10621	7515	8724	6909	7824	7461	7535	8819	14330	8456	17883	9697	8162	12026	10105	8119	9080	7795	8464	8715
498	3''-Hydroxy-geranylhydroquinone	261.15	1	29346.2	0.446625	C18132	C16H22O3	-H(-)	100	498	261.15	JIPPNUPHXUEYHJ-MLPAPPSSSA-N	Lipids and lipid-like molecules	7421	3922	6161	3757	11472	12176	9593	11494	12039	8655	11322	6902	8492	8544	20277	11417	8723	10420	21366	12951	15880	9201	10612	12952	29650	29157	12628	17221	7756	10672	10894	24751	9022	9110	10644	25902
499	Triapenthenol	262.192	1	1944.64	0.920119	C19135	C15H25N3O	-H(-)	100	499	262.192	CNFMJLVJDNGPHR-UKTHLTGXSA-N	Organoheterocyclic compounds	423	469	408	433	695	635	669	927	727	736	770	674	634	771	793	1069	570	735	862	684	772	689	751	665	889	555	731	727	649	594	703	737	573	614	959	762
500	Feruloylputrescine	263.14	1	20576.6	0.843034	C10497	C14H20N2O3	-H(-)	100	500	263.14	SFUVCMKSYKHYLD-FNORWQNLSA-N	Phenylpropanoids and polyketides	1118	705	912	632	3911	3757	3451	4509	4184	5291	3353	3875	3040	3018	3441	3788	5355	3709	4857	2284	3125	2713	3158	5520	5321	5187	4621	4953	4464	3352	2429	2706	3360	2847	2901	3680
501	Dehydrojuvabione	263.165	1	107000	0.377242	C09657; C17747	C16H24O3	-H(-)	100	501	263.165	DEMNMQDWPCIOLA-OLZOCXBDSA-N	Lipids and lipid-like molecules	5293	362	5440	376	10552	10089	7570	14285	13007	19043	9185	11791	8201	7604	10770	13284	18066	9579	15888	6048	7792	4036	8741	21525	16029	17760	15455	16880	15176	5743	3680	4135	7984	4415	8745	9946
502	Heptadecatrienoic acid	263.201	1	21581.7	0.940461	C16344	C17H28O2	-H(-)	100	502	263.201	FAFSAZIEJFMBBY-PDBXOOCHSA-N	Lipids and lipid-like molecules	527	371	599	210	1988	2209	1541	2188	2119	2932	1631	1849	1240	1184	1839	1987	2730	1977	2461	1412	1667	1339	1969	3228	2408	2259	2780	2414	2302	1321	991	1202	1311	1254	1885	1721
503	Juvenile hormone II acid	265.182	1	30574.2	0.93628	C04834; C09693; C09694	C16H26O3	-H(-)	100	503	265.182	CZRJNVJQSPMQTQ-XKLQKUTNSA-N	Lipids and lipid-like molecules	6041	6687	4419	5747	7014	7355	7816	9909	8435	7212	7629	7463	7668	8613	8324	8111	6965	11631	8432	6235	6000	5520	9581	9478	9173	6719	7365	8787	6143	7754	6503	7636	8094	6892	8305	8389
504	Hydroprene	265.218	1	22441.8	0.904214	C18862	C17H30O2	-H(-)	100	504	265.218	FYQGBXGJFWXIPP-UEVLXMDPSA-N	Lipids and lipid-like molecules	1290	2488	1269	2274	2891	3263	2999	3007	3276	3309	2615	3340	3120	3376	2846	3236	2862	3822	3078	2951	3351	2612	3477	4120	3071	2896	3921	3245	2813	3324	2589	2974	2639	2573	3650	2514
505	Coumestrol	267.03	1	29988.9	0.921326	C10205	C15H8O5	-H(-)	100	505	267.03	ZZIALNLLNHEQPJ-UHFFFAOYSA-N	Phenylpropanoids and polyketides	2430	2340	2441	2868	4271	4913	4034	4172	4764	4227	5202	4029	4417	4594	4409	4094	4636	4636	5016	3944	4335	4334	4470	3721	4336	4137	4298	4027	4357	4122	3960	3888	4207	4453	3595	4102
506	omega-Cyclohexylundecanoic acid	267.233	1	21793.2	0.608133	C12100; C16536	C17H32O2	-H(-)	100	506	267.233	WFTPSUGFEZHCGU-UHFFFAOYSA-N	Lipids and lipid-like molecules	7549	13965	6782	15887	8637	9976	9660	8438	12201	9739	8643	9014	8279	9726	10555	9861	9235	8829	8289	9444	11638	8827	9585	11304	13245	10626	9561	11749	9189	9035	9073	9958	11922	9102	10869	15718
507	Apigenin	269.045	1	47696.2	0.950612	C01477; C02495; C06563; C08730; C10023; C10037; C10044; C10113; C10294; C10343; C10369; C10376; C10379; C10397; C14313; C14314; C15222; C16796	C15H10O5	-H(-)	100	507	269.045	KZNIFHPLKGYRTM-UHFFFAOYSA-N	Phenylpropanoids and polyketides	987	2091	972	2179	4629	5242	4311	6938	4495	4871	6012	4744	4273	4366	4985	4209	4727	4792	5456	3963	4577	4745	5042	4976	5196	4928	4772	4955	5156	6131	4380	5176	5631	5165	3844	4366
508	(10S)-Juvenile hormone III acid diol	269.176	1	26650.7	-0.0490498	C16506	C15H26O4	-H(-)	100	508	269.176	UULZSWLWBGEDTD-WGRJTNITSA-N	Lipids and lipid-like molecules	14951	17059	14037	16278	15561	15516	15680	15862	14079	17054	16836	13623	15852	15824	15192	14140	14438	15115	15837	15314	15266	15083	14004	16365	16529	14677	14939	15290	16513	15822	15192	14638	15892	14772	15706	16004
509	17beta-Methylestra-1,3,5(10)-trien-3-ol	269.191	1	11397.8	0.929212	C15020; C15085	C19H26O	-H(-)	100	509	269.191	SVEOBRKOIXNDIJ-DQDQBAQVSA-N	Lipids and lipid-like molecules	7690	5337	5276	5970	5249	6097	5104	5890	5477	5474	6127	5039	4482	5274	5756	5937	4997	5367	5357	4959	5306	5064	5330	4766	6299	6156	5074	6043	5787	5377	5013	4938	6206	4877	5312	5758
510	16-Oxo-palmitate	269.213	1	59895.3	0.533583	C19614	C16H30O3	-H(-)	100	510	269.213	NKVUEIHJDGURIA-UHFFFAOYSA-N	Lipids and lipid-like molecules	41508	33535	28581	38593	26775	26566	26814	27492	27344	24170	27467	25443	25591	28708	30451	26744	27421	27423	25416	27019	23168	27013	25902	25840	36910	28442	27376	33441	27964	26170	25609	26376	26300	24207	31424	27759
511	Methyl palmitate	269.248	1	104119	-0.494055	C16995	C17H34O2	-H(-)	100	511	269.248	FLIACVVOZYBSBS-UHFFFAOYSA-N	Lipids and lipid-like molecules	132937	91503	97720	156996	67959	72441	73134	67203	72328	67982	65841	74734	69928	80806	76116	70955	75130	72518	64463	71339	73771	71493	67515	70985	108944	80404	66266	93151	84196	66063	77534	68102	86812	69252	88414	86570
512	Estradiol-17beta	271.17	1	19707.8	0.319965	C00951; C02537; C14500; C15129; C15261	C18H24O2	-H(-)	100	512	271.17	VOXZDWNPVJITMN-ZBRFXRBCSA-N	Lipids and lipid-like molecules	7270	5269	6273	4618	7277	7812	7799	7564	7385	8524	7726	7647	6347	6533	7263	7582	7091	8204	7830	6685	7505	6655	7833	8207	7007	7095	7130	6873	6830	7566	6981	7494	7278	8002	8023	8266
513	3-Oxo-delta4-steroid	271.206	1	9066.06	0.906061	C00619; C01034; C02941	C19H28O	-H(-)	100	513	271.206	MSEZLHAVPJYYIQ-UHFFFAOYSA-N	Lipids and lipid-like molecules	2846	3067	1840	2692	2823	2671	2791	3517	2900	2697	3822	2529	2851	3271	3006	3142	2792	2447	2801	2780	2288	2475	3778	2498	2923	2632	3165	2469	2560	2923	2867	3275	2464	2703	2808	3063
514	16-Hydroxypalmitate	271.228	1	63706.9	0.641761	C18218	C16H32O3	-H(-)	100	514	271.228	UGAGPNKCDRTDHP-UHFFFAOYSA-N	Lipids and lipid-like molecules	11251	14189	8315	18606	11811	13021	13341	13199	13193	12422	13556	12612	11466	11919	14022	12421	12914	12241	11412	14465	12778	11623	12650	13412	14404	12234	12902	12888	11182	12667	13166	11287	12886	12052	13950	12379
515	Hexadecasphinganine	272.26	1	1416.9	0.979779	C13915	C16H35NO2	-H(-)	100	515	272.26	ZKLREJQHRKUJHD-JKSUJKDBSA-N	Organic nitrogen compounds	345	639	402	655	605	705	546	640	495	506	581	657	703	707	502	571	472	613	490	581	544	552	489	517	683	639	569	650	579	708	559	560	577	577	781	601
516	Podocarpic acid	273.148	1	26332.4	0.949067	C09171; C14660; C18131	C17H22O3	-H(-)	79	516	273.149	VJILEYKNALCDDV-OIISXLGYSA-N	Lipids and lipid-like molecules	3063	2332	2543	2372	4068	4588	4446	4342	5159	5011	6488	4112	4121	4054	4868	4693	4133	4821	6488	4346	4583	4244	4603	5393	4706	4646	4614	4815	4585	5181	5296	5037	4495	4813	4541	4559
517	C18:5	273.185	1	15475.4	0.953147	C07254; C10903; C15257; C18524	C18H26O2	-H(-)	100	517	273.185	NPAGDVCDWIYMMC-IZPLOLCNSA-N	Lipids and lipid-like molecules	1246	233	1375	283	3188	3217	2885	3607	3566	3565	3019	3048	2514	2928	3187	3704	2906	3225	3912	2652	3042	2743	3418	3514	2827	3000	3099	3015	2709	3378	3103	3172	3193	3102	2937	3726
518	(2R,3R)-3-Methylornithinyl-N6-lysine	273.193	1	11381.3	0.697378	C20278	C12H26N4O3	-H(-)	100	518	273.193	PBUWDBPUDWMXGC-KXUCPTDWSA-N	Amino acids, peptides, and analogues	1896	802	2308	754	2858	2344	2523	4385	2798	4034	4065	3561	2748	3077	4700	2682	3973	2838	4462	3658	2816	3374	4363	3543	2273	2994	4169	3456	3351	3105	2464	3673	4168	3803	2749	2541
519	p-Coumaroylagmatine	275.151	1	59511.5	0.896632	C04498	C14H20N4O2	-H(-)	100	519	275.151	AKIHYQWCLCDMMI-VMPITWQZSA-N	Phenylpropanoids and polyketides	2177	1039	2322	1082	4474	7784	4556	4819	4886	4527	5259	5636	5105	6978	5231	5674	5548	5314	9527	5173	4724	6124	5824	4599	6329	6172	5478	5005	5072	4626	4234	4160	3940	4111	5886	4797
520	Buddledin A	275.166	1	50525.3	0.563776	C09623; C10494; C17506; C20000	C17H24O3	-H(-)	100	520	275.166	SXWKLEULMBLXJM-PCRFWOPQSA-N	Lipids and lipid-like molecules	4570	3603	4147	3641	6912	8014	6647	6751	7001	6831	8648	6752	6441	7314	6668	7211	6386	7525	10306	6101	7191	6867	8135	6338	6948	6747	6662	6240	6493	7443	6511	6622	6482	5981	7649	7569
521	Stearidonic acid	275.202	1	14716.7	0.947014	C16300; C19042	C18H28O2	-H(-)	100	521	275.202	JIWBIWFOSCKQMA-LTKCOYKYSA-N	Lipids and lipid-like molecules	656	494	720	465	2143	3192	2362	2158	2187	1987	1896	2252	1399	1660	2030	2109	1475	1858	2187	2198	2315	2623	3533	3949	1844	1725	2619	2000	1427	2956	2225	2560	2443	2380	3049	1834
522	3beta-Hydroxysteroid	275.239	1	2708.72	0.882728	C02945; C02956; C03072; C14254; C15638	C19H32O	-H(-)	70	522	275.239	DJTOLSNIKJIDFF-WUPSSNNBSA-N	Lipids and lipid-like molecules	843	1125	799	673	1102	1498	1224	1481	1107	1479	1226	1276	1311	1380	1408	1242	1135	1431	1437	1596	1378	1610	1401	1884	1429	1280	1259	1553	1149	1336	898	1297	1373	1215	1358	1098
523	(6Z,9Z,12Z)-Octadecatrienoic acid	277.216	1	1.06375e+06	0.286211	C06426; C06427; C07289; C08315; C08364; C15201	C18H30O2	-H(-)	100	523	277.216	VZCCETWTMQHEPK-QNEBEIHSSA-N	Lipids and lipid-like molecules	91	143	107	146	3522	7499	6146	3666	3122	9533	3092	8007	3819	3509	4867	10343	4219	6742	4264	15052	12273	8187	20712	15241	5645	4447	13673	3753	2617	6734	5067	7227	5308	4349	17657	3609
524	Autumnolide	279.124	1	47014.3	0.943241	C09346; C09480; C09707; C15514	C15H20O5	-H(-)	100	524	279.124	NWSWVIKHALGAER-KVLFNOHQSA-N	Lipids and lipid-like molecules	1360	2656	1149	2560	4665	5223	4802	4767	4980	5097	5356	4881	4443	4383	4974	4874	4308	5011	5314	4729	4671	5014	5754	5228	5066	4194	5399	4581	4150	5455	4813	5294	4940	4964	5188	4475
525	C18:2	279.233	1	575061	-0.330043	C01595; C04056; C08282; C08321; C08459	C18H32O2	-H(-)	100	525	279.233	OYHQOLUKZRVURQ-HZJYTTRNSA-N	Lipids and lipid-like molecules	644	1638	635	1753	10609	19522	11914	10179	8999	18732	8204	17475	8628	7922	12007	15683	9662	11938	11628	24868	24408	16424	32074	30508	12458	10238	24441	8980	7010	17703	10238	12256	13023	8320	27329	9918
526	2-Acetoxyamino-1-methyl-6-phenylimidazo[4,5-b]pyridine	281.104	1	54798.4	0.955864	C20287	C15H14N4O2	-H(-)	100	526	281.104	OVPSYMLYTZOTQE-UHFFFAOYSA-N	Organoheterocyclic compounds	1734	2256	1754	3017	5516	6252	8579	5711	6023	6088	6349	5715	5262	6096	6604	5882	6087	6439	6706	4938	6034	5272	5575	4944	6900	5323	5644	6549	5559	5407	5193	5218	5825	5337	5475	5708
527	Randainol	281.119	1	25184.3	0.955469	C10878	C18H18O3	-H(-)	100	527	281.118	OUJJWPMPNAGHRR-HWKANZROSA-N	Benzenoids	1353	1826	1210	1698	4688	4170	6307	4546	4217	4702	4313	4353	4599	4684	4301	4273	4610	5019	5152	3835	4599	4444	4525	4392	4415	4497	4659	4776	4320	4708	4442	4157	4072	4024	5014	4193
528	Hymenoxon	281.139	1	41301.6	0.94557	C09482; C09538; C15971	C15H22O5	-H(-)	100	528	281.139	PYINVOHSOZSEPB-DKGLCQEFSA-N	Organoheterocyclic compounds	4325	4066	4175	3891	6804	6973	6811	7096	6801	6808	6894	6695	6113	7044	7189	7228	6602	6855	8095	6117	6228	6118	6688	7541	6679	6365	6821	6688	5798	7542	5713	6588	6836	5966	7051	6581
529	6-Oxabicyclo[3.1.0]hexane-2-undecanoic acid methyl ester	281.213	1	17804.8	0.724996	C15465	C17H30O3	-H(-)	100	529	281.213	JXXIAKRPDCYUOP-UHFFFAOYSA-N	Lipids and lipid-like molecules	4304	7369	3615	8686	7066	8096	7311	7409	7113	7887	6440	7139	6338	6691	7030	7126	7066	7447	7560	7974	7926	7107	9389	11172	7767	7255	8201	7376	6600	7041	6581	6584	7074	6000	9416	7045
530	Guanosine	282.084	1	32507.7	0.962438	C00387; C08432	C10H13N5O5	-H(-)	100	530	282.084	NYHBQMYGNKIUIF-UUOKFMHZSA-N	Nucleosides, nucleotides, and analogues	135	493	134	450	6088	5282	4799	7415	8796	5958	5053	5345	3579	3935	5614	4907	7485	4122	8822	3909	5244	5253	5023	6832	5739	4791	6909	6131	5979	3841	3568	3288	4379	4241	4355	5657
531	Rhein	283.024	1	60302.4	0.965428	C10401	C15H8O6	-H(-)	100	531	283.024	FCDLCPWAQCPTKC-UHFFFAOYSA-N	Benzenoids	659	373	692	375	6322	6398	7286	6823	7573	7454	6114	6659	5497	6804	7342	6764	6016	7666	8242	5955	6613	7886	8141	6874	5580	5031	5243	5866	4238	8196	6939	7488	6874	7290	5389	6379
532	(10S)-Juvenile hormone III diol	283.192	1	26751.3	0.889147	C16505	C16H28O4	-H(-)	100	532	283.192	MBJDYYPZJXVUHJ-RATZTOCSSA-N	Lipids and lipid-like molecules	20021	11918	14005	15285	13412	13419	13470	14072	13367	13112	12000	12877	12772	12213	13358	12883	12897	12758	12640	11838	12053	11385	12161	14820	15988	13020	12171	15404	13608	11525	12924	12758	11799	11814	14831	12866
533	Retinal	283.207	1	23587.3	0.965248	C00376; C02110; C13037; C14655; C15016; C15170; C15262; C16681	C20H28O	-H(-)	100	533	283.207	NCYCYZXNIZJOKI-OVSJKPMPSA-N	Lipids and lipid-like molecules	31436	14230	19317	22210	13972	14757	14078	14208	13558	13545	12594	14628	12269	13283	15382	14135	14358	13086	12845	15684	13664	14738	15544	14222	19005	16367	13874	17940	16059	12073	14147	12790	15409	13053	17020	13978
534	Riccionidin A	284.032	1	69514.6	0.974805	C08728	C15H9O6	-H(-)	68	534	284.032	MTJMCDKXNOATIZ-UHFFFAOYSA-O	Organoheterocyclic compounds	226	190	212	223	3916	3598	4549	4302	4837	4611	3833	4084	3456	4420	4533	4197	3938	4769	5267	3798	4011	5174	4994	4267	3442	3238	3355	3833	2713	5147	4323	4673	4335	4743	3321	3996
535	Salicin	285.098	1	72771.6	0.947141	C01451; C16964; C17599	C13H18O7	-H(-)	100	535	285.098	NGFMICBWJRZIBI-UJPOAAIJSA-N	Carbohydrates and carbohydrate conjugates	1753	1013	1490	1362	4345	4470	6541	5266	5067	6444	6085	5441	5851	5218	3950	3825	6835	5220	7488	6177	4515	6033	6030	4732	4295	4970	3346	5113	4654	4193	4590	5126	5834	5757	3546	4974
536	Androstenedione	285.186	1	12782	0.960793	C00280; C14483; C14502; C15293; C15315; C20217; C20252	C19H26O2	-H(-)	100	536	285.186	AEMFNILZOJDQLW-QAGGRKNESA-N	Lipids and lipid-like molecules	3041	1425	1997	1369	2975	3593	3279	3348	3369	3427	3792	3324	2508	2783	3306	3818	2579	3465	3768	3232	3052	3170	3779	3785	2887	2882	3261	3007	2533	3384	3030	3255	3401	3132	3705	3036
537	2,3-Dihydroxycyclopentaneundecanoic acid	285.207	1	27574.1	0.868778	C14987; C19615	C16H30O4	-H(-)	100	537	285.207	NHWAOBNJSBDJAL-UHFFFAOYSA-N	Lipids and lipid-like molecules	12808	11767	9193	13921	10603	10702	10009	10313	10632	10315	11208	10474	10528	11117	10809	10178	9552	10642	10717	10673	9913	10239	9515	12841	11012	10180	10094	9833	9543	10552	10394	10740	10566	9231	11545	9978
538	Retinol	285.224	1	7334.33	0.975781	C00473; C00899; C09092; C11873; C11885; C11886; C11887; C16682; C17276; C18220; C18222; C19962; C20148	C20H30O	-H(-)	66	538	285.224	FPIPGXGPPPQFEQ-OVSJKPMPSA-N	Lipids and lipid-like molecules	4075	2366	2823	2687	2771	3215	2917	3127	2839	3149	3194	3496	3077	2907	2911	3290	2943	2926	2922	3601	3004	3080	3287	3776	2954	2696	2853	2728	2619	3117	2952	3154	3051	2743	3531	3088
539	3-Hydroxy-palmitic acid methyl ester	285.243	1	8681.34	0.902812	C11849; C13947	C17H34O3	-H(-)	100	539	285.243	YBTWUESFQWFDMR-UHFFFAOYSA-N	Lipids and lipid-like molecules	7465	4885	5256	6756	4299	4462	4077	5014	5003	4183	4144	4628	4037	4270	4795	4581	4518	4451	4045	5293	4156	4386	4105	4955	4960	4157	4394	4639	3933	4666	4541	4827	4577	4462	4695	4441
540	Sulmazole	286.065	1	51959.5	0.985211	C13749	C14H13N3O2S	-H(-)	100	540	286.065	XMFCOYRWYYXZMY-UHFFFAOYSA-N	Organoheterocyclic compounds	348	239	259	246	2556	2590	2788	2815	2910	3147	2887	2773	2436	2750	2870	2899	3021	2844	3784	3145	2760	2968	2968	2482	2388	2326	2439	2685	2297	2992	2468	2646	2689	2678	2486	2830
541	L-Octanoylcarnitine	286.202	1	4422.76	0.901732	C02838	C15H29NO4	-H(-)	100	541	286.202	CXTATJFJDMJMIY-CYBMUJFWSA-N	Lipids and lipid-like molecules	1416	1606	861	1124	1636	1507	1445	1694	1759	1719	2057	1764	1743	1665	1819	2239	1828	1831	2646	1721	1910	1730	1835	1760	2384	1768	2134	1749	1443	1959	1716	1690	1595	1780	1747	1743
542	6beta-Hydroxy-17beta-estradiol	287.165	1	19703.1	0.943592	C03935; C05141; C05301; C14209; C15385	C18H24O3	-H(-)	100	542	287.165	QZZRQURPSRWTLG-UXCAXZQLSA-N	Lipids and lipid-like molecules	2179	1976	1777	1685	4038	4683	4054	3969	4582	4565	4591	3780	3422	3756	4195	4507	3289	4339	4727	4127	4277	3926	4817	4911	4147	3937	4229	3749	3644	4662	4033	4169	4373	4029	4526	4095
543	Testosterone	287.2	1	7784.35	0.922071	C00535; C00674; C01227; C03772; C14491; C14682; C15258; C15335; C15377; C15395	C19H28O2	-H(-)	27	543	287.2	MUMGGOZAMZWBJJ-DYKIIFRCSA-N	Lipids and lipid-like molecules	1314	748	1187	865	2263	2524	2501	2350	2171	2387	2307	2047	1999	2429	2391	2739	2094	2763	2877	2232	2014	2051	3254	3230	2044	2047	2518	2022	1646	2606	2108	2345	2240	2201	2552	2310
544	Androsterone	289.218	1	5712.08	0.901743	C00523; C01986; C03917; C04295; C04373; C05293; C07635; C14210; C14631; C14932; C15326; C15442	C19H30O2	-H(-)	100	544	289.218	QGXBDMJGAMFCBF-HLUDHZFRSA-N	Lipids and lipid-like molecules	945	1173	891	1178	1867	1619	1960	1677	1663	1752	1700	1707	1534	1751	1735	1722	1552	1801	2018	1676	1680	1455	1847	2003	1747	1758	1567	1430	1640	1932	1661	1692	1761	1257	1821	1447
545	2,7-Anhydro-alpha-N-acetylneuraminic acid	290.088	1	31042.6	0.954136	C04521; C04580; C08341	C11H17NO8	-H(-)	100	545	290.088	NCMJSVDTRDLWJE-GSQQXRCOSA-N	Organoheterocyclic compounds	352	476	410	426	2877	3058	2466	2955	3118	4004	2817	2819	3807	3944	3336	3157	5098	3946	3792	3000	3128	2177	2658	3165	3354	3525	3595	2829	3094	2481	2131	2140	2431	2309	2842	3475
546	Penbutolol	290.213	1	2368.38	0.867712	C07416	C18H29NO2	-H(-)	100	546	290.213	KQXKVJAGOJTNJS-HNNXBMFYSA-N	Benzenoids	432	211	387	353	900	1018	695	939	924	982	1141	912	800	894	832	825	866	832	913	822	885	904	1098	1090	947	937	817	1172	747	984	766	740	791	873	751	885
547	N-Glycosyl-L-asparagine	293.099	1	64132.3	0.964774	C03411	C10H18N2O8	-H(-)	100	547	293.099	RDVZONQWDDILKB-ITZFQDDFSA-N	Amino acids, peptides, and analogues	375	686	368	813	3726	3510	4111	5105	5325	6271	3807	4637	4834	5127	4561	4923	5053	5633	5845	4285	4259	3799	3960	4672	5639	5455	5205	4727	5583	5033	3882	4415	5118	5796	3382	4146
548	Phytuberin	293.178	1	204240	0.764281	C09709; C10342; C10462	C17H26O4	-H(-)	14	548	293.178	YARAJYKHRCCDLG-XLNGHYISSA-N	Lipids and lipid-like molecules	77208	108730	51689	111151	66640	70133	83108	122340	107773	72834	90110	71514	77417	83456	69252	109781	55089	95584	64958	68890	65607	60343	80688	76493	76771	57787	73787	75162	59089	66928	61245	116553	100833	70691	92641	82965
549	(9Z)-(13S)-12,13-Epoxyoctadeca-9,11-dienoic acid	293.212	1	229086	0.920867	C04594; C04780; C13798; C14765; C14766; C16316; C16326; C16342; C16346; C19613; C19827	C18H30O3	-H(-)	100	549	293.212	ZFVKKBAQVWQQHP-OIWUYTFDSA-N	Lipids and lipid-like molecules	1266	1960	1034	1929	10583	13383	10314	11480	11434	10755	10848	11364	8722	9994	11376	11274	11223	11611	12836	9410	10672	7100	15597	17462	11978	9941	13284	11736	10228	10685	7103	9183	8542	6670	10848	9937
550	de-Hypoxanthine futalosine	295.082	1	70355.6	0.975127	C17010	C14H16O7	-H(-)	71	550	295.082	XWPBBHHZDYSYMS-ZXRVKKJVSA-N	Carbonyl compounds	896	90	906	113	4438	3284	3678	3476	4220	4451	4834	3469	3777	3372	4295	3591	3532	3842	4760	4579	3001	3081	3634	3311	3300	3233	2989	5213	3149	5489	4058	3822	3683	3604	3342	3821
551	Graphinone	295.155	1	30947.5	0.935468	C09674	C16H24O5	-H(-)	100	551	295.155	NESRXFGQJARQNM-LQFWQHRQSA-N	Alcohols and polyols	3300	3175	2953	2901	6470	6757	6101	6741	7060	6542	6829	5699	5301	5968	6146	6196	5875	6573	7452	6546	5443	5419	6308	6625	5782	5147	5224	6421	5898	7255	5846	6090	6348	5674	5740	6290
552	10-Deoxymethynolide	295.192	1	17746.1	0.923736	C11993	C17H28O4	-H(-)	100	552	295.192	NZUJVBSYQXETNF-PQWITYJESA-N	Phenylpropanoids and polyketides	3626	2090	2956	1782	7920	4998	5775	10305	9881	5673	4886	5303	3378	3933	4896	5334	4887	4734	9434	3728	5074	6856	7133	7237	5052	5651	5988	7110	5467	5741	5471	5353	9231	7263	4868	7335
553	(9Z,12Z)-(8R)-Hydroxyoctadeca-9,12-dienoic acid	295.228	1	59417.8	0.913247	C08318; C08368; C14762; C14767; C14825; C14826; C19617	C18H32O3	-H(-)	100	553	295.228	UKRXAPMQXXXXTD-QMEIEYGNSA-N	Lipids and lipid-like molecules	1223	3666	1208	3332	7930	8516	6283	7849	7536	7430	7743	7458	5656	6412	6765	7471	7289	7182	7650	6591	6432	6346	7760	10943	7480	7108	7852	7804	7055	6495	4611	4691	5875	4943	6369	6187
554	Oleic acid methyl ester	295.265	1	9542.65	0.875445	C03425; C13787; C13838	C19H36O2	-H(-)	100	554	295.265	QYDYPVFESGNLHU-KHPPLWFESA-N	Lipids and lipid-like molecules	1889	3251	1958	3667	3179	3443	3138	2946	3466	3698	2905	3565	2720	3278	3144	3120	3246	3289	3152	4245	4179	3031	3961	4976	4000	3492	3975	3951	3014	3394	2650	3382	3502	2671	4324	3333
555	Phytol	295.301	1	1917.73	0.934318	C01389	C20H40O	-H(-)	100	555	295.301	BOTWFXYSPFMFNR-PYDDKJGSSA-N	Lipids and lipid-like molecules	236	449	207	513	798	805	683	761	968	769	731	604	664	780	747	786	795	753	902	934	719	946	938	1105	777	621	842	857	753	871	803	756	704	698	845	818
556	6-Nitrobenzo[a]pyrene	296.072	1	293649	0.943185	C19472; C19475	C20H11NO2	-H(-)	48	556	296.072	NMMAFYSZGOFZCM-UHFFFAOYSA-N	Benzenoids	12	36	10	47	3552	3109	4032	4135	4674	4299	3452	3642	3406	4312	4176	3785	3573	4171	4817	3632	3850	4653	4602	3793	3145	2804	3215	3526	2458	4629	4082	4346	3903	4294	3307	3631
557	Tridemorph	296.295	1	1526.17	0.933001	C11285	C19H39NO	-H(-)	100	557	296.295	YTOPFCCWCSOHFV-UHFFFAOYSA-N	Organoheterocyclic compounds	238	181	140	189	416	500	477	485	483	526	457	473	430	515	567	484	425	539	606	534	474	522	609	478	415	432	366	495	270	513	551	447	401	496	386	504
558	D-Prephenyllactate	297.061	1	56922.3	0.938995	C00994	C13H14O8	-H(-)	100	558	297.061	LNGMWZFHTXFDNM-RBDZCENOSA-N	Organic acids and derivatives	2012	3117	2143	3218	6100	5271	6068	5939	6314	6482	6458	5885	6122	6068	6674	6494	6751	6817	6972	5630	8107	5958	6483	5198	6531	5801	5954	5689	4939	6587	5730	5643	5520	5806	5498	6656
559	Thalassemine; Picein	297.098	1	64300.3	0.974673	C01961; C10720	C14H18O7; C8H19N4O6P	-H(-); -H(-)	100	559	297.098	FRAIHXIYAIPKII-LURJTMIESA-N	Amino acids, peptides, and analogues	1025	1981	1109	1831	5384	5423	5017	5564	5725	6068	5839	5566	5067	5590	5979	5603	5312	5785	6278	5081	5060	5620	5377	4761	5105	5113	5351	4946	5038	6178	5024	5291	5473	5310	5329	5475
560	Dibenzylsuccinate	297.113	1	57151.2	0.986061	C07332; C18165	C18H18O4	-H(-)	69	560	297.113	ODBOBZHTGBGYCK-UHFFFAOYSA-N	Benzenoids	700	1245	591	919	4736	5630	4760	6276	6360	6778	5920	6124	4702	5129	6748	6261	6221	5683	6982	4319	5188	6796	7095	4016	5316	4193	5964	4160	5464	4395	5023	4752	6466	5793	6140	5886
561	Sesamex	297.134	1	80028	0.967008	C19146; C19956	C15H22O6	-H(-)	100	561	297.134	WABPPBHOPMUJHV-UHFFFAOYSA-N	Organoheterocyclic compounds	6605	12656	4947	9786	16333	15414	15217	17671	17544	16886	16751	14964	14926	15650	17352	15459	14003	18121	17177	14840	13400	15425	14925	14590	15950	14615	15294	15732	14369	16981	15142	16244	15472	15337	15518	14755
562	Norethindrone	297.185	1	23777.7	0.980787	C05028; C14249; C15114; C15142; C15219; C15277	C20H26O2	-H(-)	100	562	297.185	VIKNJXKGJWUCNN-XGXHKTLJSA-N	Lipids and lipid-like molecules	3921	11862	2822	6466	7233	7081	7273	8972	8310	6785	7477	5994	6080	7406	8359	7354	6117	10166	7816	6259	6030	6548	6612	7377	7425	5980	6935	7270	6004	7137	6545	8023	6878	6456	6493	6072
563	Plakortic acid	297.206	1	16052	0.95761	C17158	C17H30O4	-H(-)	100	563	297.206	ZCLJFHUIADAYRQ-CMDGGOBGSA-N	Organoheterocyclic compounds	4201	8345	3455	6484	6516	5909	6129	7463	6419	6224	6695	5396	5951	6284	6278	6071	5830	7492	6228	5690	5317	6057	6033	6685	6562	5825	5753	6722	5780	5904	5510	5975	6054	5412	5853	5675
564	2-Oxooctadecanoic acid	297.244	1	56118.4	0.25143	C00869; C08365; C13791; C19418; C19616	C18H34O3	-H(-)	100	564	297.243	JUCAMRNDACLKGY-UHFFFAOYSA-N	Lipids and lipid-like molecules	30921	33488	23527	38126	25351	26042	25403	26571	24119	23108	26705	25523	23941	30568	30193	29872	27706	27237	22987	26499	23449	25478	23466	24492	39246	29203	24964	33223	26876	23638	24238	23934	25626	24291	31822	24149
565	Retinoate	299.201	1	248967	0.899634	C00777; C07058; C09188; C12078; C14489; C14652; C14684; C14925; C15263; C15307; C15353; C15493; C16683; C18195; C18196; C20428; C20429	C20H28O2	-H(-)	100	565	299.201	SHGAZHPCJJPHSC-YCNIQYBTSA-N	Lipids and lipid-like molecules	6572	5213	6152	4819	10962	11450	9344	10720	10708	10145	17161	9535	8278	8481	9705	9892	7983	9382	18971	8168	9581	9179	11057	11583	9053	8572	9371	8343	7702	10524	10401	10183	9809	8967	9150	10293
566	Tributyrin	301.167	1	47724.2	0.809872	C13870	C15H26O6	-H(-)	93	566	301.167	UYXTWWCETRIEDR-UHFFFAOYSA-N	Lipids and lipid-like molecules	6030	9400	4914	10544	10363	10736	10255	10733	10324	11147	11378	10460	9918	10960	11314	10972	10733	10119	10979	9938	9856	9420	10049	12405	12424	9938	11788	11480	11074	12831	10024	9980	10394	10701	10585	10381
567	Abietate	301.217	1	160517	0.936055	C06087; C06428; C07198; C09118; C09148; C09159; C11874; C11888; C11889; C12077; C12083; C14255; C14490; C14588; C14890; C15003; C15008; C15017; C15036; C15070; C15184; C15188; C15259; C15318; C15412; C15460; C20149; C20208	C20H30O2	-H(-)	100	567	301.217	RSWGJHLUYNHPMX-ONCXSQPRSA-N	Lipids and lipid-like molecules	2890	4523	2889	4307	4729	4775	4221	4350	4256	4859	5880	3865	4446	4064	4919	4371	4403	4251	5575	4699	4172	4480	4397	5133	4632	4557	4756	4769	4183	4915	5422	4380	3940	4075	4191	4166
568	Arachidonate	303.233	1	48543.6	0.791073	C00219; C09057; C09124; C11897; C14493; C14605; C14956; C15176; C15252; C15367; C17920; C20329	C20H32O2	-H(-)	100	568	303.233	YZXBAPSDXZZRGB-DOFZRALJSA-N	Lipids and lipid-like molecules	1833	2515	1777	3415	3106	4343	3668	3888	3067	3290	3540	2767	3135	3431	3438	3317	3245	3431	3910	3434	3525	2921	2899	3143	3484	3421	3169	3461	3321	3846	3186	3101	3354	3017	3472	3028
569	Leucocyanidin	305.067	1	64487.7	0.902232	C05906; C12127; C12136	C15H14O7	-H(-)	100	569	305.067	SBZWTSHAFILOTE-SOUVJXGZSA-N	Phenylpropanoids and polyketides	260	369	250	421	4383	4194	4748	4636	4619	4958	4933	4726	4833	5244	4906	5155	4998	5147	6202	3893	4726	3858	5090	5118	6494	5944	5042	4858	5933	7131	5356	6530	6497	6337	4108	4377
570	5-O-Methylembelin	307.192	1	115842	0.849802	C10373; C15818	C18H28O4	-H(-)	100	570	307.192	KHBJLRRAMCJZLZ-UHFFFAOYSA-N	Carbonyl compounds	2612	1404	2720	1421	9618	11542	10086	10756	12608	9295	10007	9508	6964	7063	8629	8429	8977	8571	14079	5868	7956	8451	8502	11404	8434	7812	8779	9323	8476	8771	6676	7049	7856	6460	7687	8677
571	Sclareol	307.264	1	7290.31	0.881959	C09183; C16525	C20H36O2	-H(-)	100	571	307.264	XVULBTBTFGYVRC-HHUCQEJWSA-N	Lipids and lipid-like molecules	1320	1408	1393	2461	1865	3286	2319	1989	2071	2980	1940	2475	1559	1741	2215	2671	2122	2240	2071	3283	3843	2530	4601	4871	2483	1503	3615	1740	1736	2308	2012	2205	2437	1844	4023	2286
572	N-Acetylneuraminate	308.099	1	40940.2	0.933926	C00270; C03525; C19909; C19910	C11H19NO9	-H(-)	100	572	308.099	SQVRNKJHWKZAKO-LUWBGTNYSA-N	Carbohydrates and carbohydrate conjugates	190	186	166	190	2460	2507	1881	2848	2880	3823	2241	2858	3272	3069	2694	2853	4635	3444	3742	2339	2623	1617	2066	3263	3659	3572	3773	3486	3780	2218	2368	2102	2733	2254	2997	3394
573	13(S)-HPOT	309.207	1	88623.8	0.931605	C04785; C07357; C15753; C16321; C16341; C19936; C20704	C18H30O4	-H(-)	61	573	309.207	UYQGVDXDXBAABN-FQSPHKRJSA-N	Lipids and lipid-like molecules	2428	1860	2045	1518	15524	13987	12387	16763	19552	12889	10130	12550	8307	9384	12293	14052	16802	12189	17551	6522	8740	7503	10353	22394	14944	14709	16007	17969	12924	7773	6595	6880	9751	5679	8783	9158
574	14'-apo-beta-Carotenal	309.222	1	21185.8	0.943918	C06734; C07629	C22H30O	-H(-)	100	574	309.222	NGISIFNAHMKVQR-SSRYJDFZSA-N	Lipids and lipid-like molecules	1019	865	1157	711	4500	4231	3734	4816	5383	3924	3140	3454	2722	2917	3533	3908	4550	3615	5190	2449	2980	2480	3222	6171	4058	4274	4302	5686	3685	2774	2270	2390	2875	1955	2692	3002
575	Aspulvinone G	311.056	1	35861.9	0.94083	C02007; C06800; C10201; C20444	C17H12O6	-H(-)	100	575	311.056	LNJMXTRRBBPZDK-AUWJEWJLSA-N	Benzenoids	1990	2638	1914	2719	3859	4159	4703	4308	4546	4434	4128	4205	3744	3813	4120	3983	5127	3861	4736	3835	3452	3521	3848	4135	4683	4849	4340	5074	4656	3539	3482	3597	3765	3361	3492	3799
576	(9Z,11E)-(13S)-13-Hydroperoxyoctadeca-9,11-dienoic acid	311.223	1	50890.8	0.927913	C04717; C07338; C07354; C14827; C14831; C14832; C14834; C14836; C19618; C19937; C20186; C20703	C18H32O4	-H(-)	100	576	311.223	JDSRHVWSAMTSSN-IRQZEAMPSA-N	Lipids and lipid-like molecules	3771	10579	2887	6523	15411	11990	11087	18057	16712	13594	12194	10760	8769	9571	12721	12348	15482	11219	13538	8703	8278	8433	9765	24820	16043	14398	17220	22782	14828	8940	6704	7443	8730	7151	8937	9100
577	Phytanate	311.295	1	30796.2	-0.457144	C01607; C06425	C20H40O2	-H(-)	100	577	311.295	RLCKHJSFHOZMDR-UHFFFAOYSA-N	Lipids and lipid-like molecules	32453	22225	27322	75237	19315	23136	23239	22177	19748	26714	17426	24110	20545	20815	22819	26717	18338	22944	16828	28742	26973	21823	30192	32225	25543	22371	26908	20418	19254	19715	22648	23613	21084	19886	33322	22629
578	FGAM	312.06	1	26492.2	0.951267	C04640	C8H16N3O8P	-H(-)	100	578	312.06	PMCOGCVKOAOZQM-XVFCMESISA-N	Carbohydrates and carbohydrate conjugates	288	809	335	987	2747	2347	2647	2923	3284	2905	2682	2478	2483	2704	3003	2739	2737	2868	3176	2296	2304	2862	2653	2178	2639	2617	2812	2323	2279	2740	2403	2700	2354	3022	2440	2218
579	(+)-Prosopinine	312.255	1	3618.24	0.920291	C10167	C18H35NO3	-H(-)	100	579	312.255	KYBOBXNXZQTAKA-NXHRZFHOSA-N	Alkaloids and derivatives	1509	1251	956	1804	1259	1466	1260	1457	1428	1510	1217	1209	1332	1361	1428	1219	1074	1339	1337	1121	1248	1313	1270	1364	1437	1138	1392	1780	1170	1309	1202	1426	1136	1071	1248	1216
580	Jatrophatrione	313.18	1	31960.9	0.976054	C09119; C09194; C14670; C14930; C14999; C15228; C16678; C18015	C20H26O3	-H(-)	100	580	313.18	TYBGBKQPLBAYQG-CJIMKZOCSA-N	Lipids and lipid-like molecules	3978	6626	3066	4951	7190	7951	7022	8846	7883	8002	9919	7033	6051	6330	7753	7132	6442	8297	10491	6078	6476	6576	7364	8700	7742	6406	6778	7027	7172	6537	6417	6662	7360	6124	6611	6733
581	(9Z)-(7S,8S)-Dihydroxyoctadecenoic acid	313.238	1	22362	0.879542	C07355; C14828; C14829; C19620; C20702	C18H34O4	-H(-)	100	581	313.238	WBZXABQRBWTVNN-JINBKUQRSA-N	Lipids and lipid-like molecules	13857	10619	9432	13970	8502	8050	7651	9455	8982	8215	8936	7918	7507	8517	8269	8634	8443	8484	8021	8657	7789	8389	8329	10343	9773	9209	9775	10125	8037	8418	9065	7817	9026	8089	10537	8108
582	Gibberellin A12 aldehyde	315.197	1	38129.5	0.962775	C06093; C09066; C09163; C09182; C09196; C09706; C09845; C14242; C14615; C14717; C14887; C15126; C15192; C15282; C15287; C16677; C16679; C16680; C18016	C20H28O3	-H(-)	100	582	315.197	ZCTUNYRXJKLWPY-YBNSQJHGSA-N	Lipids and lipid-like molecules	3035	1509	2223	1360	6319	5753	5516	6547	6469	5707	11127	5560	4404	4727	5907	5934	4546	5652	13298	4979	5152	5252	6548	6062	4776	4365	4466	4749	4559	6957	5155	5896	5804	5005	4882	5824
583	(-)-Menthyl O-beta-D-glucoside	317.196	1	17577.5	0.948224	C03962; C04165	C16H30O6	-H(-)	100	583	317.196	GZSDZJZIZBGBON-NZZARTGWSA-N	Lipids and lipid-like molecules	229	1316	229	1600	2985	4484	3013	3144	3713	3820	5240	3626	3232	3556	3801	3930	2818	3769	4430	3411	3144	3689	4046	3535	3109	2698	3464	2877	2410	4517	2899	3272	3106	2727	3513	3098
584	Leukotriene A4	317.212	1	27292.9	0.935965	C00909; C02645; C04577; C09079; C09110; C11875; C13843; C14555; C14628; C14665; C14683; C14732; C14807; C14891; C14929; C14945; C14980; C15354; C15434; C17498; C17956; C18177; C20212	C20H30O3	-H(-)	100	584	317.212	UFPQIRYSPUYQHK-WAQVJNLQSA-N	Lipids and lipid-like molecules	3012	2691	2043	3194	3416	4325	3519	3571	3671	3667	10111	3519	3273	3519	3407	3703	3054	3797	10769	3203	3519	3396	3992	3708	3335	3215	3418	3285	2888	3895	3409	3597	3474	3280	3466	3449
585	4-Coumaroylshikimate	319.082	1	44453.7	0.963409	C02947; C11586; C18358	C16H16O7	-H(-)	100	585	319.082	GVECSFFLZYNEBO-PDXJTRCTSA-N	Phenylpropanoids and polyketides	685	637	690	764	3060	3180	2821	3862	4053	3320	5264	2863	2757	2909	4358	4572	4242	3182	4665	3033	3968	3074	3114	2493	2693	2725	2738	2597	2415	2980	2718	2705	3000	2713	4728	4244
586	alpha-Zearalenol	319.155	1	29815.5	0.956581	C14750; C14751; C14754	C18H24O5	-H(-)	100	586	319.155	FPQFYIAXQDXNOR-QDKLYSGJSA-N	Phenylpropanoids and polyketides	1773	2590	1919	2956	3577	3494	3604	3596	3375	3526	3588	3314	3237	3519	3513	3394	3194	3465	3869	3117	3221	2984	3456	3345	3783	3150	3355	3391	3619	3451	3140	3101	3064	3193	3226	3077
587	C21:3	319.264	1	8301.18	0.935756	C05484; C10809; C14878; C14982; C15047; C15198; C18042	C21H36O2	-H(-)	100	587	319.264	YWYQTGBBEZQBGO-BERLURQNSA-N	Lipids and lipid-like molecules	202	683	201	475	868	960	829	896	1108	1042	1037	944	952	849	940	920	840	894	1013	911	938	769	938	924	755	800	895	1102	731	918	788	604	699	971	920	882
588	Leucodelphinidin	321.062	1	48483.5	0.969326	C05909	C15H14O8	-H(-)	100	588	321.062	ZEACOKJOQLAYTD-SOUVJXGZSA-N	Phenylpropanoids and polyketides	470	667	476	900	3101	2932	2683	3272	3458	3622	3448	3309	3359	3194	3369	3310	4107	3459	4234	2341	3180	2956	2990	3101	3266	3259	3040	2880	3518	2968	2612	2825	3098	2772	2525	3318
589	alpha-Zearalanol	321.172	1	65608.1	0.959888	C14752; C14753	C18H26O5	-H(-)	26	589	321.172	DWTTZBARDOXEAM-GXTWGEPZSA-N	Phenylpropanoids and polyketides	11795	23189	16674	26928	17344	19923	21073	18194	13945	11727	11285	11150	12146	15210	15493	12617	11830	11285	9752	11496	10573	10914	8885	8835	17737	14163	10810	17004	16336	10113	10753	9450	9346	10196	9774	9500
590	2alpha-(Hydroxymethyl)-5alpha-androstane-3beta,17beta-diol	321.243	1	10182.3	0.928361	C14970; C15285	C20H34O3	-H(-)	100	590	321.243	GMNUCAFZYMWGOG-GABTWMSCSA-N	Lipids and lipid-like molecules	1361	1940	1284	2674	1847	1870	1856	2001	1871	1750	2090	1752	1748	1759	1844	1774	1590	1883	2132	2118	1867	1542	2090	2179	2032	1896	1765	1838	1500	1734	1647	1469	1887	1550	1838	1735
591	Tetraneurin E	323.15	1	49956.7	0.913202	C09560	C17H24O6	-H(-)	100	591	323.15	CLPRBVIHHFLWQY-SGXNCSQFSA-N	Lipids and lipid-like molecules	1027	496	889	436	4539	5417	6206	4683	5029	5934	5093	5215	4295	5136	5591	6450	4831	5974	5808	5396	5312	5617	6786	4659	4452	4138	5105	4686	4104	5540	4938	5540	5441	5177	6023	5179
592	Piperonyl sulfoxide	323.168	1	39050.3	0.943054	C19147	C18H28O3S	-H(-)	100	592	323.168	ATTZFSUZZUNHBP-UHFFFAOYSA-N	Organoheterocyclic compounds	3302	4390	3009	2874	7897	8347	10070	8241	8112	9374	8161	7835	6819	8237	9333	9554	7040	9638	9063	8210	8285	8470	9671	7934	7558	6431	8200	7618	6797	8792	7372	8670	8649	7891	8128	7890
593	Oleoylethanolamide	324.29	1	3697.36	0.541127	C20792	C20H39NO2	-H(-)	100	593	324.29	BOWVQLFMWHZBEF-QAFBOUAWSA-N	Organic nitrogen compounds	145	340	217	290	483	436	611	644	460	690	595	627	443	374	556	569	377	586	581	554	499	475	731	656	483	309	668	496	394	511	580	519	450	376	500	525
594	Sinapoyltartronate	325.057	1	53900.5	0.956966	C02750	C14H14O9	-H(-)	100	594	325.057	BILXTXFCLYPNMR-ONEGZZNKSA-N	Phenylpropanoids and polyketides	979	709	1002	778	5201	3962	4894	5935	5847	6826	3464	6812	7253	8932	5580	6994	6934	8073	6457	4775	5703	5151	5455	5457	5682	5545	5267	4004	4789	4723	5226	5003	6101	5731	4540	5814
595	4-O-beta-D-Glucosyl-4-hydroxycinnamate	325.093	1	95396	0.975485	C04415; C05158; C05839; C06739; C07605; C16827	C15H18O8	-H(-)	100	595	325.093	LJFYQZQUAULRDF-FDGSXQGBSA-N	Carbohydrates and carbohydrate conjugates	64	821	59	811	5146	4726	4887	4894	5691	5219	5945	4646	5656	5515	6338	5485	5494	6171	5885	5469	5253	5302	5474	4611	4056	4104	4391	4483	4124	5527	4479	4830	4882	4708	5826	4852
596	Promegestone	325.218	1	33711.7	0.973024	C14208; C15190	C22H30O2	-H(-)	100	596	325.218	QFFCYTLOTYIJMR-XMGTWHOFSA-N	Lipids and lipid-like molecules	4673	12168	3538	6893	9638	10767	9957	12583	10228	10244	10254	10005	7977	8850	10971	10242	8205	11384	10854	8509	8701	9446	11133	12776	9737	8612	9645	10200	8384	10173	8896	11991	10246	8861	9773	9045
597	2-Oxophytanate	325.273	1	7975.59	0.918983	C02117	C20H38O3	-H(-)	30	597	325.273	CQJGVSCAFSXDSB-KURKYZTESA-N	Lipids and lipid-like molecules	3038	3739	1736	5063	3133	3122	2778	3990	3315	3263	2895	3333	3054	3257	3466	3305	3232	3376	3134	3234	3410	3375	3180	4632	4133	3394	3270	4143	3262	3407	3093	3432	2961	2878	3519	3064
598	Betagarin	327.087	1	35151.7	0.968116	C09479; C14985; C14986; C16188; C16189; C17475	C18H16O6	-H(-)	100	598	327.087	IHPVFYLOGNNZLA-ZDUSSCGKSA-N	Phenylpropanoids and polyketides	421	599	375	688	2659	3246	2631	3516	3292	3850	3370	3467	2519	2462	3760	3131	4080	2970	4326	2798	2707	3512	3361	2721	3731	3154	3466	3480	2971	3043	2388	3205	2897	2853	2435	3029
599	2,3-Dinor-8-iso prostaglandin F1alpha	327.218	1	161393	0.815017	C14795	C18H32O5	-H(-)	100	599	327.218	XHHYJZGDOMKLEE-RLDLTEIJSA-N	Lipids and lipid-like molecules	4217	6228	2999	5129	24609	23736	22001	24854	30423	21323	19158	19278	15826	17140	21203	17940	24758	18692	27765	11716	16454	14558	17741	26158	26307	20977	26483	25687	20771	16949	12534	16047	16097	12919	17025	15634
600	1-O-Vanilloyl-beta-D-glucose	329.087	1	163135	0.958206	C20470	C14H18O9	-H(-)	58	600	329.087	YROOZUQRTLHXIO-DIACKHNESA-N	Phenylpropanoids and polyketides	217	554	200	621	7236	4634	6032	7327	9036	7671	6958	6090	6100	6641	8880	8110	6159	8496	10260	6945	6712	6232	6932	4427	5326	5308	6226	4419	5075	6110	4254	5341	5591	6718	4746	4896
601	8-Epiiridodial glucoside	329.16	1	57430.4	0.790826	C11656; C11670; C17055; C17634; C17635; C17636; C17637	C16H26O7	-H(-)	80	601	329.161	UKWQRDBDDIGHEQ-XLOWEYQUSA-N	Lipids and lipid-like molecules	1170	2743	962	3126	8773	9357	8176	10073	9921	10871	9315	9001	7129	7965	9403	9705	9658	10007	10179	8149	8850	7698	9585	11968	9697	8920	9662	8874	8437	8629	7411	7095	7927	8190	8780	9040
602	9,12,13-TriHOME	329.234	1	145381	0.898024	C14833; C14835; C14837	C18H34O5	-H(-)	100	602	329.234	MDIUMSLCYIJBQC-MVFSOIOZSA-N	Lipids and lipid-like molecules	2174	4924	1750	4829	14169	14299	11001	22872	15685	16656	12619	12303	9613	10627	11964	13496	15793	13158	15287	8867	10483	8579	10495	16784	20364	13780	16463	18773	14898	9066	8210	7963	9544	7275	9164	9500
603	C22:5	329.249	1	24558.7	0.983194	C11896; C13364; C15413; C15421; C16184; C16513	C22H34O2	-H(-)	100	603	329.249	APIZAZFFQBVSJA-ZJDLJICXSA-N	Lipids and lipid-like molecules	684	1447	468	1298	3282	3154	2654	4723	3773	3514	3268	2654	2602	2456	2742	3036	3552	3367	3818	2475	2712	2350	2824	3796	4006	2933	3456	4166	3370	2596	2298	2202	2316	2159	2764	2323
604	C22:4	331.266	1	3033.37	0.938674	C15373; C16527	C22H36O2	-H(-)	56	604	331.266	LBGCQMWKTKHISP-WZYQIZRJSA-N	Lipids and lipid-like molecules	475	567	520	891	1039	1421	1100	1132	1261	1061	1541	1144	1099	1121	1269	1516	1176	1338	1293	1351	1184	1115	1108	1304	1233	1402	1106	1226	1141	1399	1300	1326	1005	1061	1415	1409
605	sn-Glycero-3-phospho-1-inositol	333.059	1	95130.9	0.956904	C01225; C04641; C04703; C10517	C9H19O11P	-H(-)	100	605	333.059	BMVUIWJCUQSHLZ-UJGXJMNGSA-N	Lipids and lipid-like molecules	186	317	188	409	8139	8236	6038	5041	5903	6535	7736	4970	4347	5124	7555	7894	6752	6335	9546	5960	6685	4718	7778	4670	2155	2422	2824	2263	1742	4069	2747	3024	3090	2489	8267	5829
606	12-Keto-leukotriene B4	333.207	1	33465	0.944066	C05949; C05953; C05954; C05955; C05957; C05958; C09125; C09150; C11876; C14504; C14815; C14913; C15159; C18173	C20H30O4	-H(-)	100	606	333.207	SJVWVCVZWMJXOK-NOJHDUNKSA-N	Lipids and lipid-like molecules	2824	2628	2256	3079	6596	6753	6649	6381	6645	6070	18595	5713	5403	5109	6019	6027	5981	5729	19320	5252	5739	6366	5943	5585	6045	5657	5121	5836	5223	5542	5960	5271	5955	5458	5883	6112
607	13,16,19-Docosatrienoic acid	333.28	1	2456.01	0.782839	C16534	C22H38O2	-H(-)	100	607	333.28	WBBQTNCISCKUMU-IUQGRGSQSA-N	Lipids and lipid-like molecules	735	1425	625	1005	1415	1365	1263	1120	1250	1322	1350	1086	1171	1100	1235	1389	1490	1042	1685	1392	876	1275	1385	1479	1276	1000	1016	1089	891	1168	1164	1156	1151	1144	1241	1189
608	Prostaglandin B1	335.223	1	25519.9	0.934681	C00959; C02165; C04685; C04686; C04822; C04849; C05356; C05965; C05966; C09087; C09175; C14781; C14808; C14810; C14812; C14813; C14820; C14821; C14823	C20H32O4	-H(-)	100	608	335.223	YBHMPNRDOVPQIN-VSOYFRJCSA-N	Lipids and lipid-like molecules	719	2254	632	2406	3023	3153	2817	2869	2885	3015	6294	2621	2941	2916	3063	2821	2946	2920	5308	2520	2995	2877	2738	3297	2692	2654	2739	2840	2328	3276	2928	2675	2454	2700	2804	2831
609	13,16-Docosadienoic acid	335.295	1	2105.37	0.79337	C16533	C22H40O2	-H(-)	100	609	335.295	HVGRZDASOHMCSK-HZJYTTRNSA-N	Lipids and lipid-like molecules	698	1012	651	958	941	805	1087	915	1023	1199	1120	980	883	1086	932	1357	815	1055	994	1523	990	933	1339	1070	958	911	1106	722	646	1153	940	915	940	1005	833	883
610	L-Ascorbic acid-2-glucoside	337.078	1	60701.7	0.975926	C18339	C12H18O11	-H(-)	100	610	337.078	MLSJBGYKDYSOAE-DCWMUDTNSA-N	Lipids and lipid-like molecules	247	213	211	242	3006	3653	2806	2747	3022	3361	3569	2962	2547	2681	3257	3452	3021	3156	3865	2867	3041	3135	3356	2543	2420	2371	2746	2427	2344	3154	2801	2898	3096	2915	3379	3003
611	Aphidicolin	337.238	1	9256.94	0.939597	C06088; C09205; C14772; C14773; C14774; C14775	C20H34O4	-H(-)	100	611	337.238	NOFOAYPPHIUXJR-KQNRYIIMSA-N	Lipids and lipid-like molecules	1583	2214	1163	1956	2729	2457	2774	2654	2816	2682	2442	2296	2503	2380	2355	2625	2127	2836	2663	2449	2588	2247	2730	2763	2540	2223	2708	2306	2016	2714	2429	2601	2481	2402	2841	2551
612	Erucic acid	337.311	1	3151.3	0.815939	C08316	C22H42O2	-H(-)	100	612	337.311	DPUOLQHDNGRHBS-KTKRTIGZSA-N	Lipids and lipid-like molecules	1407	1670	1285	4178	2082	1996	1989	1677	2268	2542	1258	2082	1717	1705	1872	2381	1698	2043	1981	2068	1981	1748	2731	2743	1774	1857	2872	1370	1669	1861	1714	1825	1910	1789	2630	2904
613	Daphnin	339.073	1	999199	0.969005	C01421; C02887; C09206; C09264	C15H16O9	-H(-)	56	613	339.073	HOIXTKAYCMNVMY-PVOAASPHSA-N	Phenylpropanoids and polyketides	673	5	619	6	3154	2839	4074	4084	4139	3959	2712	4094	3728	4220	4303	4223	4292	4434	5090	2650	3902	4792	3719	3070	3362	3728	3532	2889	3382	3574	4147	4166	4231	4163	3251	4067
614	Dimethisterone	339.233	1	23802.3	0.916215	C07628; C15186	C23H32O2	-H(-)	100	614	339.233	LVHOURKCKUYIGK-RGUJTQARSA-N	Lipids and lipid-like molecules	4542	5063	3853	3383	8066	7376	10589	13271	11851	9239	7128	9457	9592	10356	11518	9818	11096	11270	13409	6405	8251	11513	8190	7508	8459	8780	9213	7539	8550	8404	10197	9988	11815	10402	7556	9722
615	C22:0	339.327	1	22874.6	-0.317739	C08281	C22H44O2	-H(-)	100	615	339.327	UKMSUNONTOPOIO-UHFFFAOYSA-N	Lipids and lipid-like molecules	4014	5569	5016	28721	8131	9000	10587	11298	11648	11656	7324	11292	10164	11319	12371	12718	12336	12522	13203	10633	11220	13700	12738	12221	9970	10549	13782	8517	8817	9303	11399	11441	12250	11425	13501	11594
616	Disaccharide	341.109	1	1.26172e+06	0.837858	C00089; C00185; C00208; C00243; C00252; C00897; C01083; C01235; C01518; C01711; C01725; C01728; C01742; C01970; C01971; C02048; C02964; C03857; C04147; C04219; C05400; C05402; C06421; C06422; C07064; C08240; C08250; C15548; C18068; C19632; C19633; C19634; C19636; C19773; C20236	C12H22O11	-H(-)	100	616	341.109	CZMRCDWAGMRECN-UGDNZRGBSA-N	Carbohydrates and carbohydrate conjugates	1378	2577	869	1480	63905	56981	107359	60200	66870	75531	41655	61378	57099	48685	83352	79612	45261	68719	77081	70376	65215	52567	65126	32420	33899	39904	37890	34734	24041	48080	56100	51184	61441	39654	101244	78747
617	Lamtidine	343.225	1	14421.4	0.968221	C11804	C18H28N6O	-H(-)	100	617	343.225	NRIGRKAXOLMTSK-UHFFFAOYSA-N	Organoheterocyclic compounds	1930	1138	1391	1251	3351	3517	3475	3545	3510	3691	3927	3876	3842	3672	3955	4182	3613	4210	4024	3656	3777	3086	3791	3863	3928	3536	3740	3380	3001	3579	3130	2972	3603	3372	4503	3303
618	1-O-Octadecyl-sn-glycerol	343.321	1	1597.16	0.123431	C13858	C21H44O3	-H(-)	100	618	343.321	OGBUMNBNEWYMNJ-UHFFFAOYSA-N	Lipids and lipid-like molecules	267	222	260	303	444	685	724	557	618	726	563	582	454	498	700	739	585	682	737	607	541	550	549	413	520	504	540	430	424	499	499	636	640	513	679	477
619	Irehine	344.297	1	1852.09	0.742752	C10810	C23H39NO	-H(-)	100	619	344.297	UJGXCOFZMJCRLN-VBFLNORGSA-N	Lipids and lipid-like molecules	779	881	731	723	1263	1356	1070	977	1243	1649	1283	1224	1155	1328	1439	1402	1222	1856	1569	1053	1731	1439	1515	1475	1461	1252	1206	1365	997	1345	1448	1481	1390	1389	1044	1299
620	Ginkgoic acid	345.243	1	8426.65	0.945336	C10794; C11898; C14976	C22H34O3	-H(-)	100	620	345.243	YXHVCZZLWZYHSA-FPLPWBNLSA-N	Benzenoids	3837	2231	2975	2484	2313	2834	2168	2405	2437	2411	2533	2590	2408	2447	2567	2658	2396	2726	2585	2512	2688	2566	3016	3086	2590	2262	3017	2676	2082	2656	2293	2550	2498	2192	2930	2183
621	5-(Heptadec-12-enyl)resorcinol	345.28	1	3152.41	0.898501	C10802	C23H38O2	-H(-)	100	621	345.28	KDUIMXINOLVPCT-WAYWQWQTSA-N	Benzenoids	1753	1325	1016	1735	1439	2475	1937	1838	1511	1899	1759	2114	1905	1908	2424	1587	1312	1745	2841	2072	2158	1704	1709	2372	1615	1339	1376	1816	1663	1452	1254	1311	1798	1585	1511	1544
622	AMP	346.056	1	61069	0.8437	C00020; C00362; C00946; C01367; C04378; C19970	C10H14N5O7P	-H(-)	100	622	346.056	UDMBCSSLTHHNCD-KQYNXXCUSA-N	Nucleosides, nucleotides, and analogues	1401	698	1272	882	18734	13454	9549	14681	15615	24796	18876	17884	10967	12713	14467	19233	29537	16617	19721	7520	10392	5255	11580	26517	25006	17402	16899	20063	21463	11178	8389	7156	11413	7777	12070	15956
623	Schizonepetoside E	347.171	1	29665.4	0.967744	C17638	C16H28O8	-H(-)	100	623	347.171	IRZZAYRPVZPEKL-UHFFFAOYSA-N	Lipids and lipid-like molecules	524	693	550	863	3529	4494	3592	3549	3944	4315	4958	3673	3751	4266	4059	4156	3942	3680	5084	3547	3575	3887	4107	3706	5206	3443	3712	5233	3887	4005	3702	3694	4058	3462	4071	4063
624	6-Pentadecylsalicylic acid	347.259	1	4141.82	0.900058	C10759; C14919	C22H36O3	-H(-)	100	624	347.259	ADFWQBGTDJIESE-UHFFFAOYSA-N	Benzenoids	380	510	361	528	771	1035	855	811	801	1022	1105	1152	953	872	1040	1004	1230	1033	1052	1061	1255	1035	1073	1326	1091	1014	1172	1026	968	1021	1027	930	967	922	1000	1077
625	(5Z,13E)-11alpha-Hydroxy-9,15-dioxoprost-13-enoate	349.201	1	27249.9	0.953831	C04707; C04758; C04835; C06439; C13802; C18171; C18176; C18848; C20214	C20H30O5	-H(-)	100	625	349.201	YRTJDWROBKPZNV-KMXMBPPJSA-N	Lipids and lipid-like molecules	871	834	838	1089	2964	3582	2834	3148	3603	3549	6756	2822	2918	2823	3430	3303	3169	3093	6844	2954	2941	3209	3436	3148	2347	2610	2841	2778	2321	3345	2832	3047	3174	3085	3237	3252
626	Tetrahydrocorticosterone	349.237	1	8598.76	0.955702	C05476; C05483; C14594; C15368; C15403; C17496	C21H34O4	-H(-)	62	626	349.237	RHQQHZQUAMFINJ-DTDWNVJFSA-N	Lipids and lipid-like molecules	1432	1043	672	2569	1243	1503	1411	1329	1427	1660	1959	1540	1565	1458	1529	1598	1409	1656	2101	1964	1631	1471	2209	1807	1400	1389	1592	1369	1010	1416	1300	1410	1589	1269	2354	1486
627	Prostaglandin H2	351.219	1	17927.2	0.893326	C00427; C00584; C00696; C01312; C02198; C04654; C04671; C04853; C05960; C06314; C06315; C06476; C11997; C13807; C13808; C17652; C17656	C20H32O5	-H(-)	100	627	351.219	YIBNHAJFJUQSRA-YNNPMVKQSA-N	Lipids and lipid-like molecules	660	1722	639	1920	3791	4441	3721	3802	3832	4306	5516	4028	3278	3182	3633	4106	3599	3852	5153	3297	3904	3729	3650	3953	2969	2902	3395	3412	2592	3982	3450	3202	3526	3241	3929	4192
628	Montanol	351.253	1	9313.04	0.96157	C09137	C21H36O4	-H(-)	40	628	351.252	CFWFJIRDZVFKJB-GRZKGYEASA-N	Lipids and lipid-like molecules	223	564	156	791	1009	1129	1084	989	1449	1510	1211	1596	1137	1049	1362	1303	1376	1119	1324	1529	1853	1450	1532	1891	1503	1526	1459	1377	1159	1427	1462	1400	1290	1088	1815	1481
629	Chlorogenate	353.088	1	73910.3	0.952802	C00852; C01527; C08996; C17147	C16H18O9	-H(-)	100	629	353.088	CWVRJTMFETXNAD-JUHZACGLSA-N	Alcohols and polyols	551	1118	507	1338	3736	4237	3511	4192	5104	4446	4437	3818	3895	4225	4467	3930	4254	4414	5288	3414	3686	4557	4068	4205	3946	4243	4205	4148	4049	4496	4114	4125	4664	4344	4310	4999
630	Fusarenone X	353.124	1	45138.6	0.973892	C19583	C17H22O8	-H(-)	100	630	353.124	XGCUCFKWVIWWNW-UWKSZNKUSA-N	Lipids and lipid-like molecules	479	742	459	779	3206	3483	2850	3381	3503	4224	3740	3049	3019	3086	3508	3154	3504	3285	4022	2942	2899	3146	3462	3054	3137	3228	3285	3422	2995	3453	2794	2836	3270	3296	3430	3397
631	Prostaglandin F2alpha	353.234	1	12535.4	0.96168	C00639; C02314; C04741; C04843; C05959; C06438; C12786; C13809; C14782; C14809; C14811; C14814	C20H34O5	-H(-)	100	631	353.233	PXGPLTODNUVGFL-YNNPMVKQSA-N	Lipids and lipid-like molecules	2021	2710	1418	2167	3122	3576	3492	4195	4085	3572	3741	3383	3293	3339	3903	3643	3347	5295	4124	3343	3479	3169	4075	3878	3326	2833	3050	3332	2975	3478	3335	3509	3835	3100	4323	3826
632	Gentiopicrin	355.103	1	79025.4	0.980494	C09782; C17759	C16H20O9	-H(-)	64	632	355.103	DUAGQYUORDTXOR-GPQRQXLASA-N	Carbohydrates and carbohydrate conjugates	107	578	105	558	5065	5451	4516	4546	5488	4847	5767	4362	4268	4386	5511	5055	4888	4722	5788	4330	4616	4986	5178	3707	3844	3537	4178	4115	3457	4733	4041	4205	4525	4344	5375	4704
633	13-Hydroxydocosanoic acid	355.322	1	5106.36	0.947345	C03049; C19623	C22H44O3	-H(-)	100	633	355.322	BYCZEMFWXYCUSJ-UHFFFAOYSA-N	Lipids and lipid-like molecules	428	1430	253	2966	1286	1596	1157	1163	1319	1511	1447	1645	1239	1393	1661	1459	1269	1319	1190	1896	1639	1367	2130	2041	1388	1374	1624	1485	1185	1521	1447	1422	1714	1303	1913	1383
634	Pregnenolone acetate	357.243	1	8658.13	0.956079	C14658; C14931; C15115; C15266; C15374	C23H34O3	-H(-)	100	634	357.243	CRRKVZVYZQXICQ-RJJCNJEVSA-N	Lipids and lipid-like molecules	2364	1820	1109	1421	2285	2547	2311	2527	2095	2301	2553	2233	2074	2266	2118	2436	2184	2237	2637	2672	2285	2131	2316	2869	2471	1937	2438	2127	1781	2382	1991	2366	2526	2752	2672	1928
635	Ophiobolin F	357.317	1	1935.02	0.288238	C16818	C25H42O	-H(-)	100	635	357.317	JNYWQVTXIGGOTC-AIKDQUDGSA-N	Lipids and lipid-like molecules	354	562	234	574	749	890	802	737	780	820	647	823	730	918	908	922	833	936	1076	803	718	780	921	1251	530	802	751	687	676	848	721	803	775	790	918	904
636	C24:4	359.297	1	1766.77	0.961736	C19642	C24H40O2	-H(-)	100	636	359.296	RPKLZQLYODPWTM-LVVAJZGHSA-N	Lipids and lipid-like molecules	505	715	374	579	622	727	715	725	740	692	711	542	676	631	727	679	676	781	853	977	886	757	876	758	613	566	690	798	730	637	624	614	742	675	779	621
637	Cortisol	361.202	1	24866.6	0.953886	C00735; C01124; C03588; C05469; C05473; C08837; C10695; C15034	C21H30O5	-H(-)	100	637	361.202	JYGXADMDTFJGBT-VWUMJDOOSA-N	Lipids and lipid-like molecules	174	829	130	955	3242	3469	2797	3211	3194	3129	3540	3164	2425	3127	3405	3461	2602	3200	3560	2812	2915	2855	4007	3491	2603	2578	2811	2745	2646	3307	2684	3073	3275	2810	3201	2974
638	Terminaline	362.307	1	1394.91	0.759315	C10825	C23H41NO2	-H(-)	100	638	362.307	QTNGLMWAVBOBLJ-RCFZRFIHSA-N	Lipids and lipid-like molecules	129	243	89	364	456	395	359	406	453	583	712	475	492	643	516	623	456	578	481	406	528	511	505	476	435	518	435	400	353	379	393	417	571	455	528	362
639	Urocortisol	365.231	1	13524.8	0.96489	C05472; C05481	C21H34O5	-H(-)	22	639	365.231	AODPIQQILQLWGS-GXBDJPPSSA-N	Lipids and lipid-like molecules	1261	738	723	1000	1444	2245	1566	1765	1675	2184	2435	1983	2714	2291	2027	2467	1670	2832	2714	2146	2086	1666	2290	3019	1686	1785	2181	1828	1561	2094	1367	2103	1886	1733	1995	1981
640	C24:1	365.342	1	3911.04	0.876277	C08323; C15398	C24H46O2	-H(-)	100	640	365.342	GWHCXVQVJPWHRF-KTKRTIGZSA-N	Lipids and lipid-like molecules	688	1437	567	3980	1086	1892	1635	1495	1108	2756	1395	1885	1465	1231	1548	1958	1210	1597	1151	2956	2090	1493	3109	3884	1432	1367	3206	940	1048	1408	1436	1647	1560	1040	2538	1715
641	5-O-Feruloylquinic acid	367.103	1	52013.9	0.964642	C02572	C17H20O9	-H(-)	100	641	367.103	RAGZUCNPTLULOL-KJJWLSQTSA-N	Alcohols and polyols	759	266	716	341	4118	3786	3585	3799	4289	4813	4456	3642	3165	2965	3893	3623	4635	3708	5047	3583	3310	2927	3246	3992	3756	3589	3311	4696	4059	3910	3005	2777	3323	3049	2777	3647
642	C24:0	367.358	1	27511.3	-0.46434	C08320	C24H48O2	-H(-)	100	642	367.358	QZZGJDVWLFXDLK-UHFFFAOYSA-N	Lipids and lipid-like molecules	4951	11701	6623	84525	7398	16955	13613	8590	7581	20450	6535	18829	8400	8701	9506	24448	6556	15583	7049	21668	16264	11042	28701	42451	10726	8433	22069	8158	6042	10668	10400	15507	9903	8213	25678	11379
643	Fraxin	369.083	1	52662	0.980276	C09266	C16H18O10	-H(-)	100	643	369.083	CRSFLLTWRCYNNX-YJDQBUFVSA-N	Phenylpropanoids and polyketides	496	268	571	335	2460	2612	2872	2768	3396	2937	3500	2707	2382	2294	3248	3248	2954	3029	4050	2720	2495	2834	2824	2465	2670	2419	2435	2870	2687	3675	2713	2850	3318	3305	2740	2821
644	6-Keto-prostaglandin F1alpha	369.228	1	15762.6	0.962335	C05961; C05963	C20H34O6	-H(-)	100	644	369.228	KFGOFTHODYBSGM-ZUNNJUQCSA-N	Lipids and lipid-like molecules	1321	1156	1027	1083	2696	3120	2555	2568	2640	3730	2832	3480	2792	3160	3284	3193	2709	3395	3073	3357	3484	3105	4095	3340	2890	2766	3153	2531	2163	3332	2827	3226	3057	2792	3877	3228
645	Clavamycin F	371.157	1	75586.1	0.966592	C17395	C15H24N4O7	-H(-)	64	645	371.157	LSRMHWSOHWFVGB-PELMRAPFSA-N	Amino acids, peptides, and analogues	338	602	270	566	2526	2961	2951	2787	3450	3532	3374	2942	3031	3484	2892	3163	3200	3204	6631	3263	2840	2906	2790	3470	2630	2657	2300	2678	2275	3403	2508	4281	2949	2826	3145	2947
646	8,8a-Deoxyoleandolide	371.244	1	19803.2	0.932171	C11989	C20H36O6	-H(-)	100	646	371.244	OLPAVFVRSHWADO-KYEFFAPUSA-N	Phenylpropanoids and polyketides	3702	2028	2011	2178	3391	3458	3702	3601	3609	5001	3704	5419	4301	4240	4712	4708	3417	4612	4044	6148	5576	4408	5684	4681	3842	4164	5447	3334	3578	4173	3817	3881	4487	3762	6228	4303
647	3-Oxo-5beta-cholanate	373.276	1	29723.6	0.885548	C03070; C14991; C15345	C24H38O3	-H(-)	100	647	373.276	KIQFUORWRVZTHT-HSYHYESFSA-N	Lipids and lipid-like molecules	285	208	195	280	1234	1654	1733	1465	1403	2830	1402	3402	2520	1893	2013	2441	2033	2678	1854	4678	4326	2334	4573	2900	2334	2230	3097	1635	1873	1911	1786	1882	2117	1632	3864	2478
648	Lithocholic acid	375.291	1	7568	0.858415	C03990; C17658	C24H40O3	-H(-)	100	648	375.291	SMEROWZSTRWXGI-HVATVPOCSA-N	Lipids and lipid-like molecules	162	227	110	297	635	733	809	804	740	1299	702	1220	853	793	988	1285	722	972	852	1949	1630	988	1769	1599	912	862	1268	642	583	718	648	876	894	591	2261	1180
649	Chaparrinone	377.16	1	35720.3	0.967144	C08757; C09362; C09433; C09517	C20H26O7	-H(-)	100	649	377.16	VLYMLZRDCSQUQF-RZUZYEBMSA-N	Lipids and lipid-like molecules	476	538	414	512	2774	3150	7234	3167	3249	3736	3420	3113	2787	3229	3091	3448	2754	3238	4255	2743	2854	3298	3515	2966	3032	2839	2996	2894	2580	3632	3016	3330	3502	3334	3160	3175
650	6alpha-Hydroxycortisol	377.195	1	28026.1	0.953602	C15291; C17012	C21H30O6	-H(-)	46	650	377.195	GNFTWPCIRXSCQF-HVIRSNARSA-N	Lipids and lipid-like molecules	1186	670	854	1125	3484	3476	8293	3677	3898	4245	3910	3779	3067	3190	3700	4179	3343	4164	4826	3338	3331	3489	4779	3640	3080	2992	3079	3133	3048	4302	3503	3704	4043	3475	3810	3982
651	2-Arachidonoylglycerol	377.27	1	3911.66	0.941362	C13856; C13857	C23H38O4	-H(-)	100	651	377.27	RCRCTBLIHCHWDZ-DOFZRALJSA-N	Lipids and lipid-like molecules	602	403	734	467	1021	1029	2180	985	1219	1243	1069	1210	1009	1219	1230	1364	1114	1353	1547	1125	1215	1356	1395	1300	936	938	1185	1003	874	1065	1168	1154	1218	1118	1300	1179
652	Methicillin sodium	378.089	1	38634.6	0.913056	C13973	C17H19N2O6S.	-H(-)	100	652	378.089	NRZPASQBOYNGHR-HWROMZCQSA-M	Amino acids, peptides, and analogues	889	1189	918	1023	6671	6706	51865	5634	6702	9870	6831	5920	5295	5405	7986	7142	5895	7194	8530	5356	6189	6032	7087	4208	4537	4662	5262	4872	4353	6479	5857	6003	6439	5243	8247	6833
653	Chaparrin	379.176	1	29520.1	0.960775	C08756; C17643	C20H28O7	-H(-)	100	653	379.176	SYRCAVSNPCUQCQ-ZKNGBWAJSA-N	Lipids and lipid-like molecules	524	600	404	592	2593	3096	4180	2751	2954	3084	3199	2800	2492	2861	3016	2931	2619	2882	3521	2608	2638	2758	3183	2694	2390	2346	2305	2612	2357	3132	2571	2962	2982	2621	2755	2897
654	7-Dehydrodesmosterol	381.315	1	2602.22	0.855809	C05107; C15357	C27H42O	-H(-)	39	654	381.315	RUSSPKPUXDSHNC-DDPQNLDTSA-N	Lipids and lipid-like molecules	1006	786	635	1930	888	1199	1220	1015	1208	1555	986	1092	977	1042	1174	1316	1071	1128	1144	1432	1298	1239	1632	1624	1237	1203	1411	1007	945	1062	1051	1229	1257	1240	1243	964
655	2-Hydroxytetracosanoic acid	383.353	1	5170.41	0.762841	C17873	C24H48O3	-H(-)	100	655	383.353	MSUOLNSQHLHDAS-UHFFFAOYSA-N	Lipids and lipid-like molecules	1068	2367	657	10827	1995	3239	2767	1845	2187	2402	1863	2348	2175	2458	2169	2642	1959	2224	1731	2677	2752	2390	3055	4241	2248	2264	2840	2013	1817	2168	2257	2489	2320	2017	2807	2016
656	1-O-Sinapoyl-beta-D-glucose	385.114	1	793803	0.982474	C01175; C02919	C17H22O10	-H(-)	100	656	385.115	XRKBRPFTFKKHEF-DGDBGZAXSA-N	Phenylpropanoids and polyketides	115	8	132	9	7621	6566	7463	6609	7985	6805	9047	6566	6496	6566	7885	7743	6480	8219	7873	7938	6214	6412	7819	6202	6181	5915	6295	7111	6568	8675	6811	7020	7668	7747	6722	5560
657	Burseran	385.166	1	268237	0.562808	C10547; C10561	C22H26O6	-H(-)	16	657	385.166	VJMJISPSGHVBBU-IAGOWNOFSA-N	Lignans, neolignans and related compounds	40857	15940	59035	23571	57902	65559	61528	49624	58880	48287	71972	58286	58941	90049	89729	71544	60425	77826	64747	57419	45974	46082	55620	40967	118565	70546	52375	110062	78023	70534	62281	58552	74353	60246	64025	63761
658	6-Deoxyerythronolide B	385.259	1	15903.3	0.959638	C03240	C21H38O6	-H(-)	100	658	385.259	HQZOLNNEQAKEHT-IBBGRPSASA-N	Phenylpropanoids and polyketides	3024	245	1990	380	3317	3254	3826	3180	4542	3058	6246	2915	3043	3269	4910	4303	3167	5499	4318	4144	2835	2765	3847	2599	3856	2844	2845	4498	3470	4769	3807	3287	4468	4289	3418	2629
659	Rehmaionoside C	387.202	1	31813.9	0.967338	C17452	C19H32O8	-H(-)	100	659	387.202	UUBHXYINEPOWQI-XHWTUMPSSA-N	Lipids and lipid-like molecules	1442	669	1367	692	3780	6549	4685	4275	4615	6074	7068	4970	4600	4450	5289	5291	4668	4965	6217	5414	3939	4867	5643	4510	4545	4054	4240	5359	4011	6725	4368	5027	5021	4355	5909	5254
660	2alpha-Methyl-17beta-[(tetrahydro-2H-pyran-2-yl)oxy]-5alpha-androstan-3-one	387.291	1	4889.87	0.825114	C15422	C25H40O3	-H(-)	100	660	387.291	NKYKRIBPUJYTRX-SCDCJRKHSA-N	Lipids and lipid-like molecules	815	543	547	766	1303	1536	1422	1502	1428	1473	1748	1250	1326	1292	1749	1577	1445	1688	1399	1839	1310	1395	1810	1681	1391	1158	1699	1469	1172	1623	1425	1458	1432	1447	1742	1509
661	Epidihydrocholesterin	387.363	1	1624.34	0.117657	C12978	C27H48O	-H(-)	100	661	387.363	QYIXCDOBOSTCEI-FBVYSKEZSA-N	Lipids and lipid-like molecules	398	173	312	250	615	626	687	566	794	642	926	563	606	650	594	682	624	724	737	629	574	693	686	633	549	509	525	791	631	773	681	638	633	781	586	520
662	Piceid	389.124	1	142823	0.97851	C10275; C10823	C20H22O8	-H(-)	100	662	389.124	HSTZMXCBWJGKHG-CUYWLFDKSA-N	Phenylpropanoids and polyketides	22	315	19	257	2426	2945	3091	3229	4326	4095	3326	3108	3673	3933	4262	3672	3623	3201	3665	3872	3100	3465	4088	2886	3050	2812	3879	2929	2675	3453	2896	2850	3059	3584	4491	2984
663	Eupatoroxin	391.141	1	69884.4	0.963036	C09443; C09447; C09577	C20H24O8	-H(-)	100	663	391.141	QUSNLLJZMPVTTC-ZDHOEGKISA-N	Lipids and lipid-like molecules	28	574	25	564	2519	3110	2597	2967	5075	3363	3905	2953	3107	3862	4503	2834	3622	2954	3214	3408	3389	3663	3091	2757	2734	2627	3233	2605	2703	3097	2716	2754	3016	3044	3753	2995
664	Chenodeoxycholate	391.285	1	3248.5	0.848324	C02528; C04483; C07880; C15515; C15517; C17646; C17660; C17661; C17662; C17664; C17687	C24H40O4	-H(-)	100	664	391.285	RUDATBOHQWOJDD-BSWAIDMHSA-N	Lipids and lipid-like molecules	780	354	506	461	929	1175	1099	985	944	1447	982	1188	1039	922	1080	1485	982	1460	1081	1677	1366	1262	2055	2062	1070	1133	1466	1108	877	1303	1122	1326	1140	1046	1755	1238
665	delta-Tocotrienol	395.295	1	5014.13	0.942609	C14156; C20737	C27H40O2	-H(-)	100	665	395.295	ODADKLYLWWCHNB-LDYBVBFYSA-N	Lipids and lipid-like molecules	529	375	460	646	1069	1391	1171	1092	1073	1171	994	1083	823	950	917	1398	843	1130	914	1320	1328	1157	1631	2033	903	885	1414	902	829	1441	841	1049	1094	878	1415	940
666	Ergosterol	395.331	1	3319.79	0.962734	C01694; C05441; C08823; C15778; C15780; C15816; C19653	C28H44O	-H(-)	100	666	395.331	DNVPQKQSNYMLRS-APGDWVJJSA-N	Lipids and lipid-like molecules	418	601	457	1669	737	1540	1091	909	762	1155	841	1134	696	858	955	1370	867	1086	904	1387	1102	1064	1797	2171	1072	833	1322	774	686	1097	1018	1092	978	869	1749	1024
667	4alpha-Methyl-5alpha-cholest-7-en-3-one	397.348	1	3304.39	0.183774	C04453; C04525; C05103; C06957; C08813; C15777; C15781; C15785; C18192	C28H46O	-H(-)	100	667	397.348	OWKGVPXWOHLTSL-LIUJFMQASA-N	Lipids and lipid-like molecules	3936	1549	1335	3659	1521	1593	1511	2013	1913	1594	1871	1943	1703	1589	1737	1839	1786	1542	1519	1613	1568	1639	2053	2355	1704	1564	2017	1663	1331	1543	1300	1615	1484	1436	2088	1667
668	Calcidiol	399.327	1	2702.12	0.888953	C01561; C05455; C15632; C19662; C20143	C27H44O2	-H(-)	100	668	399.327	JWUBBDSIWDLEOM-DTOXIADCSA-N	Lipids and lipid-like molecules	1286	722	584	958	953	1105	1470	841	957	1199	981	1210	884	839	1243	1186	943	1123	1396	1357	888	991	1332	1462	936	1068	1074	937	1021	1147	879	722	1189	1031	1406	852
669	Pahutoxin	399.335	1	2305.19	0.932946	C16889	C23H46NO4.	-H(-)	100	669	399.335	NJEOXMPQOCEVAI-FTBISJDPSA-M	Organic nitrogen compounds	964	497	472	1065	795	1107	1429	853	1090	1162	1119	1158	801	800	1119	964	734	988	1024	1048	878	838	1182	1158	769	641	938	681	975	917	847	782	962	718	1308	935
670	Erythronolide B	401.253	1	8277.7	0.954696	C06635	C21H38O7	-H(-)	69	670	401.253	ZFBRGCCVTUPRFQ-HWRKYNCUSA-N	Phenylpropanoids and polyketides	1146	1047	1026	1298	1811	2447	2274	2490	2034	2662	2741	2315	2323	2301	2247	2331	1900	2377	3060	2214	2040	2301	2633	2531	2053	1963	2366	2277	1764	2272	1792	2180	2443	2048	2317	2069
671	Spergualin	402.284	1	1799.61	0.970758	C16747	C17H37N7O4	-H(-)	100	671	402.284	GDVNLLJNADMLLR-BBRMVZONSA-N	Amino acids, peptides, and analogues	481	574	437	504	657	844	824	647	805	787	881	864	747	745	879	878	601	672	883	1021	782	730	938	970	668	796	754	721	732	796	804	809	810	666	983	756
672	Gardenoside	403.124	1	98968.9	0.974347	C09779; C09798	C17H24O11	-H(-)	61	672	403.124	XJMPAUZQVRGFRE-HPWCAOHFSA-N	Lipids and lipid-like molecules	53	373	54	430	3484	3974	3393	4152	5694	4816	6563	3833	5257	5279	5033	4073	4995	3803	4533	5015	3730	4100	4012	3078	3782	3868	4839	3924	3204	4524	3864	3776	3545	4836	5271	4106
673	Androstane-3,17-diol dipropionate	403.283	1	3806.42	0.884316	C14624	C25H40O4	-H(-)	18	673	403.283	FWAYUWSHYLKUEY-LFWYWRBCSA-N	Lipids and lipid-like molecules	648	674	571	724	1123	1382	1381	1250	1259	1655	1275	1381	1239	1273	1199	1617	1292	1441	1465	1353	1308	1113	1372	2158	1334	1185	1659	1171	1123	1489	1135	1147	1108	1093	1541	1252
674	5alpha-Cholestan-5alpha,6beta-diol	403.358	1	1714.85	0.934379	C05424; C05452	C27H48O2	-H(-)	100	674	403.358	HKHHYUSFWJROEJ-MYMLUCEJSA-N	Lipids and lipid-like molecules	369	466	303	504	565	734	1142	487	513	830	769	587	504	656	742	714	577	742	759	621	696	696	771	577	598	585	501	860	574	522	615	573	637	460	637	603
675	Cassaine	404.281	1	3062.13	0.836017	C08670	C24H39NO4	-H(-)	100	675	404.281	GMHWATCMBXIANN-IOJUAHGHSA-N	Lipids and lipid-like molecules	430	415	362	729	844	1031	15389	1139	1100	1197	1111	1176	1080	1055	1088	1371	939	1666	1017	934	991	1021	1037	1030	1154	918	1090	1153	992	1037	993	956	1122	897	1141	1066
676	10,11-Epoxy-3-geranylgeranylindole	404.296	1	2227.35	0.943174	C20526; C20527	C28H39NO	-H(-)	100	676	404.296	QYURLADRFYOWFT-FAHBDJPOSA-N	Lipids and lipid-like molecules	298	310	245	544	534	743	12368	785	727	895	866	816	688	929	812	794	752	1051	814	666	746	733	760	781	677	701	844	682	681	753	691	851	807	785	1017	793
677	Renilla luciferin	406.155	1	80649.2	0.973294	C00982	C26H21N3O2	-H(-)	49	677	406.155	KAEGGIFPLJZUOZ-UHFFFAOYSA-N	Organoheterocyclic compounds	19434	23347	26301	28437	12570	24059	32575	18565	22670	14091	21755	25546	30971	48683	26604	31966	34086	35911	23702	9973	13396	14908	11745	12696	67143	37065	21065	48682	42246	27165	29891	23111	30854	23945	33270	34363
678	Cassaidine	406.297	1	8854.68	0.50688	C08669	C24H41NO4	-H(-)	100	678	406.297	JKPVSFQJGXEMSU-CHEGSHICSA-N	Lipids and lipid-like molecules	1221	1214	1785	1964	661	1320	2358	1214	1255	855	1367	1686	2227	5024	1707	1746	2050	2610	1638	688	714	905	923	950	8085	2964	1173	4214	3858	1884	2023	1451	2112	1563	2059	2175
679	Asebotoxin II	407.244	1	15501.2	0.974929	C09063	C23H36O6	-H(-)	100	679	407.244	VVXZWGWGAMWPOU-GTPZWBMOSA-N	Alcohols and polyols	1216	387	1339	567	1275	2716	2248	1911	1707	2278	2433	2386	2073	2359	2201	2585	2021	2538	2481	2431	2032	2007	2679	2971	2710	2250	2363	2599	2342	2821	2199	2339	2513	2334	2870	2298
680	Sterol 3-beta-D-glucoside	409.26	1	8445.78	0.954441	C03641	C23H38O6	-H(-)	100	680	409.26	XJOFOZUEVJESOR-BOKRIMDLSA-N	Lipids and lipid-like molecules	715	399	521	524	1281	1780	1421	1481	1334	1724	1371	1534	1343	1319	1461	1585	1373	1633	1663	1555	1360	1509	1963	2717	1601	1554	1839	1353	1303	2083	1401	1667	1641	1531	1650	1517
681	beta-Tocotrienol	409.311	1	2843.03	0.926192	C14154; C14155; C20738	C28H42O2	-H(-)	100	681	409.311	FGYKUFVNYVMTAM-WAZJVIJMSA-N	Lipids and lipid-like molecules	780	400	476	395	866	1121	859	995	943	1039	813	1066	888	1092	1028	1216	869	1198	954	1114	1102	1045	1152	1721	1283	1056	1166	1031	896	1320	1055	1085	919	1116	1442	956
682	4,4-Dimethyl-5alpha-cholesta-8,14,24-trien-3beta-ol	409.347	1	4311.84	0.930436	C11455; C11508; C15783	C29H46O	-H(-)	100	682	409.347	LFQXEZVYNCBVDO-PBJLWWPKSA-N	Lipids and lipid-like molecules	300	787	286	1267	623	1360	1125	809	787	962	813	945	728	856	992	1202	807	1098	782	1421	1259	1006	1687	1410	855	978	1303	916	663	856	826	792	992	668	1690	780
683	Solasodine	412.322	1	1963.06	0.879368	C10822	C27H43NO2	-H(-)	100	683	412.322	KWVISVAMQJWJSZ-VKROHFNGSA-N	Lipids and lipid-like molecules	1169	619	658	1131	649	787	764	718	807	911	1033	740	672	1100	832	741	730	943	955	939	671	747	944	899	702	714	1043	698	792	839	716	899	879	729	701	986
684	Lupulone	413.268	1	5922.98	0.922908	C10706	C26H38O4	-H(-)	24	684	413.268	WPVSVIXDXMNGGN-UHFFFAOYSA-N	Organic acids and derivatives	1039	315	551	382	1445	1760	1645	1603	1401	1698	1637	1710	1291	1209	1687	1736	1280	1759	1821	1603	1691	1414	2270	2276	1683	1270	1603	1302	1165	1793	1399	1529	1650	1480	1832	1541
685	Diosgenin	413.304	1	3770.67	0.915241	C08898; C08918; C14994; C16509; C20839	C27H42O3	-H(-)	14	685	413.304	WQLVFSAGQJTQCK-VKROHFNGSA-N	Lipids and lipid-like molecules	1057	533	363	831	858	1134	1006	1047	1074	1224	1000	1300	1012	1065	1246	1312	964	1151	1066	1528	1039	1065	1920	1732	1217	789	1334	758	850	1058	962	1121	1102	1039	1618	708
686	beta-Sitosterol	413.379	1	1598.78	0.960494	C01753; C04530; C08839; C15915; C19654	C29H50O	-H(-)	100	686	413.379	KZJWDPNRJALLNS-VJSFXXLFSA-N	Lipids and lipid-like molecules	308	364	361	403	458	695	615	558	469	528	590	657	550	461	405	651	424	720	567	785	588	791	896	734	555	462	590	671	481	641	419	516	592	586	532	535
687	all-trans-8'-Apo-beta-carotenal	415.299	1	16197.5	0.76484	C19728; C19839	C30H40O	-H(-)	23	687	415.299	DFMMVLFMMAQXHZ-DOKBYWHISA-N	Lipids and lipid-like molecules	83	763	49	863	609	1449	1205	1198	871	2391	644	1522	1253	1239	1515	2325	733	1607	611	4703	2742	1317	4357	3320	976	705	3083	594	454	1227	1214	1383	1165	906	6367	598
688	Calcitriol	415.322	1	171184	0.804118	C01673; C03963; C07712; C08127; C08913; C08914; C12919; C15633; C16493; C16819; C17331; C17332; C17333; C17336; C17339; C19648; C19649; C19650	C27H44O3	-H(-)	100	688	415.322	GMRQFYUYWCNGIN-NKMMMXOESA-N	Lipids and lipid-like molecules	22	1350	17	1687	1226	2977	2254	2334	1649	6132	1160	3957	2516	2480	3646	5521	1350	3001	871	11555	5284	2655	10070	7671	2035	1055	8171	888	615	2358	2201	2809	2077	1777	12720	1023
689	Phyllanthin	417.229	1	89100.7	0.970996	C10746; C15275; C15302	C24H34O6	-H(-)	100	689	417.228	KFLQGJQSLUYUBF-WOJBJXKFSA-N	Lignans, neolignans and related compounds	1020	1565	929	1537	3158	3220	2636	2725	2775	6358	162430	2411	8500	2644	2668	3044	2649	2664	207056	2536	2450	6939	4932	3060	2495	8390	2852	3016	2748	3304	7117	2527	2916	3029	2800	2848
690	3beta,5alpha,6beta-Cholestanetriol	419.353	1	1982.74	0.856719	C05425; C05444; C05454	C27H48O3	-H(-)	100	690	419.353	YMMFNKXZULYSOQ-RUXQDQFYSA-N	Lipids and lipid-like molecules	312	280	252	289	558	651	638	606	657	629	642	622	612	520	670	1039	476	640	659	981	891	737	1258	1775	649	585	926	559	503	733	662	703	477	602	1309	840
691	Glucoerucin	420.046	1	89488	0.975609	C08409	C12H23NO9S3	-H(-)	63	691	420.046	GKUMMDFLKGFCKH-URYVQPGZSA-N	Carbohydrates and carbohydrate conjugates	847	49	791	60	970	1170	3732	302	679	996	1198	2186	1537	2028	3389	9478	104	2234	1364	7487	6538	6302	11286	151	100	248	98	199	39	2276	2518	3680	1597	993	9061	593
692	C28:1	421.405	1	2402.99	0.879893	C20365	C28H54O2	-H(-)	100	692	421.405	SASYSVUEVMOWPL-NXVVXOECSA-N	Lipids and lipid-like molecules	735	527	671	1988	919	899	1103	853	975	920	1008	1088	935	1121	987	1170	668	1036	1015	1155	1139	1549	1331	681	726	748	709	656	542	937	1149	1224	821	794	1393	878
693	Glucoiberin	422.026	1	75057.2	0.975325	C08411	C11H21NO10S3	-H(-)	69	693	422.026	PHYYADMVYQURSX-GEINXPCQSA-N	Carbohydrates and carbohydrate conjugates	290	55	231	53	970	2147	2377	390	732	882	1636	2184	1674	2158	2401	3858	140	2727	1542	4494	3374	3440	5513	157	161	266	92	177	62	3796	2787	2746	1758	1542	4685	1246
694	Pravastatin	423.239	1	25608.7	0.961693	C01844	C23H36O7	-H(-)	100	694	423.239	TUZYXOIXSAXUGO-PZAWKZKUSA-N	Organic acids and derivatives	191	99	147	128	2471	4259	2385	2213	2419	2330	1804	2322	1385	1443	2297	2537	1347	1633	2646	3295	2704	4421	3459	3006	1193	1584	2659	1896	1162	2572	2206	2231	3784	2741	3776	1975
695	7alpha-Hydroxycholesterol; alpha-Tocotrienol	423.325	1	3449.6	0.958214	C03594; C05418; C05451; C05500; C05502; C13550; C14151; C14153; C14287; C15519; C15610; C15882; C15992	C27H46O2; C29H44O2	.Na/H-H(-); -H(-)	20	695	423.325	OYXZMSRRJOYLLO-RVOWOUOISA-N	Lipids and lipid-like molecules	362	336	270	447	893	1724	1253	808	965	868	956	799	752	970	1049	1203	676	1017	1053	1193	1084	1862	1306	923	656	718	917	742	503	1404	1158	1249	1222	1055	1530	782
696	Phospho-anandamide	425.235	1	10126.4	0.948138	C19913	C22H37NO5P	-H(-)	100	696	425.235	PZPHIQQEQWCEGG-DOFZRALJSA-M	Organic acids and derivatives	1193	643	1042	643	2558	2904	2534	2880	2773	2894	2800	2492	2160	2874	2488	2887	2384	2879	3172	2471	2665	2230	3121	3103	2621	2329	2837	2647	2236	3383	2512	2845	2799	2614	3237	3038
697	(24R,24(1)R)-Fucosterol epoxide	427.358	1	2456.14	0.829916	C03910; C11509	C29H48O2	-H(-)	100	697	427.358	XUBCLKHKJZCPFZ-UMKPQZCOSA-N	Lipids and lipid-like molecules	618	434	291	728	610	860	842	684	524	1105	564	1060	636	699	860	1023	529	931	719	1534	1171	684	1657	1658	745	614	1207	535	509	666	776	1058	677	592	1435	638
698	3beta-Hydroxy-5alpha-cholest-7-ene-4alpha-carboxylate	429.336	1	3621.14	0.909874	C04746; C14157; C14159; C14160; C16253	C28H46O3	-H(-)	80	698	429.336	FXBZYWGMTFSORP-QPCSTCLVSA-N	Lipids and lipid-like molecules	321	643	238	633	727	910	783	889	660	1169	781	968	923	782	929	1549	782	956	719	1683	1089	868	1943	1820	872	801	1434	764	603	954	904	1156	936	985	1899	994
699	alpha-Tocopherol	429.373	1	2185.9	0.933876	C02477; C04814	C29H50O2	-H(-)	76	699	429.373	GVJHHUAWPYXKBD-IEOSBIPESA-N	Lipids and lipid-like molecules	645	184	342	181	267	286	745	484	290	1443	256	1215	596	429	442	2004	265	1233	523	2430	1361	819	3050	3581	546	703	2678	258	157	658	538	961	430	813	3117	293
700	Vitexin	431.098	1	122193	0.98303	C01460; C01714; C04608; C09126; C10345; C10420; C16911	C21H20O10	-H(-)	100	700	431.098	SGEWCQFRYRRZDC-VPRICQMDSA-N	Phenylpropanoids and polyketides	57	77	50	96	2881	2668	3173	3516	3154	3941	2802	3543	3438	3695	3343	3950	3303	4096	3490	2867	2905	3183	3607	4007	2984	2885	2979	2718	2267	3307	2704	2941	3169	3264	2872	3138
701	Gitogenin	431.317	1	112419	0.825047	C08899; C16494; C17003; C17335; C18231	C27H44O4	-H(-)	100	701	431.317	FWCXELAAYFYCSR-RYKNUXCGSA-N	Lipids and lipid-like molecules	18	1433	15	1680	1127	1518	1428	1280	1005	3347	927	2144	2242	2033	1730	3336	1023	2324	722	6140	2617	1193	3236	5515	1639	1097	5669	1034	664	1487	1514	1796	1378	1532	6851	1025
702	Oleoylglycerone phosphate	433.236	1	53843.1	0.979623	C03630	C21H39O7P	-H(-)	100	702	433.236	YZKFNNQAEBNCEN-KTKRTIGZSA-N	Carbonyl compounds	168	490	140	494	3591	3672	3347	3759	4046	4372	4258	4012	3582	2694	3606	3772	5368	2489	4962	3903	3644	2692	4621	5634	5180	6039	6624	5500	5165	3790	2653	2895	3819	4125	4623	3662
703	6-Deoxoteasterone	433.369	1	4548.37	0.899038	C15799; C15801	C28H50O3	-H(-)	100	703	433.369	WPHVOXMMNSLJSF-ZMTLGMMZSA-N	Lipids and lipid-like molecules	147	604	85	727	556	752	720	612	573	1175	576	903	779	709	868	1202	519	925	477	1885	1428	800	1606	1297	558	474	1393	489	302	624	677	768	643	553	2233	567
704	Philanthotoxin 343	434.313	1	2023.86	0.533184	C13806; C20052	C23H41N5O3	-H(-)	100	704	434.313	DTWANULJDRVTFI-NRFANRHFSA-N	Amino acids, peptides, and analogues	380	273	252	206	419	800	536	472	436	643	638	575	604	648	598	821	484	728	543	1007	662	674	973	780	595	532	602	532	357	731	451	653	737	573	981	651
705	2-Phytyl-1,4-naphthoquinone	435.327	1	2493.84	0.880033	C13309	C30H44O2	-H(-)	100	705	435.327	UDYIPZFWVJJQJF-NCELDCMTSA-N	Lipids and lipid-like molecules	317	277	380	417	694	948	802	723	690	916	806	764	687	843	931	868	602	894	886	864	850	904	1106	804	674	563	686	516	532	998	854	942	802	723	1152	738
706	Glucoraphanin	436.042	1	696864	0.968324	C08419	C12H23NO10S3	-H(-)	13	706	436.042	GMMLNKINDDUDCF-SISVVIKZSA-N	Carbohydrates and carbohydrate conjugates	21	6	22	8	1530	2896	2848	677	1095	1360	2511	2696	2249	2809	2726	3759	148	3183	2360	4296	3368	3644	5162	152	131	231	95	198	49	4218	3260	3148	2181	2094	4430	2014
707	Pfaffic acid	439.322	1	4415.18	0.938696	C08965	C29H44O3	-H(-)	100	707	439.322	AXDBORJNOUXIBC-FZVIGMKHSA-N	Lipids and lipid-like molecules	870	310	572	823	871	1448	2989	1045	1084	1271	1176	1426	1128	1163	1384	1469	755	1371	1325	1625	1475	1487	1892	1118	874	1102	955	973	737	1662	1335	1393	1205	1089	1668	1190
708	Karounidiol	439.357	1	3276.53	0.934233	C17394; C17422; C19943	C30H48O2	-H(-)	66	708	439.357	UIXJVDGAGQPTFR-ZSBHZPGCSA-N	Lipids and lipid-like molecules	875	882	653	1547	1100	1640	3184	1280	1287	1505	1499	1283	1334	1674	1619	1603	1030	1824	1758	1622	1513	1448	1747	1077	1034	880	1257	836	961	1707	1459	1541	1163	1230	1916	1541
709	Lusitanicoside	441.176	1	18611.9	0.967005	C10474	C21H30O10	-H(-)	100	709	441.176	DAELTTGCCPRYTP-ZLQZEYEISA-N	Carbohydrates and carbohydrate conjugates	483	555	495	482	2070	2827	2324	2216	2587	2874	3018	2581	2021	2253	2433	2694	2218	2530	3011	2505	2348	2616	2912	2134	2052	2191	2198	2284	1862	2629	2493	2438	2576	2250	2751	2756
710	Ascorbic acid	441.286	1	7170.13	0.94883	C20340	C24H42O7	-H(-)	100	710	441.286	LITUBCVUXPBCGA-WMZHIEFXSA-N	Lipids and lipid-like molecules	1543	902	1056	838	1783	1894	2023	2200	2236	2031	1956	1774	1904	1861	2298	2226	1585	2456	2329	2119	1908	2289	2203	2164	1864	1831	2441	2278	2033	2432	2163	2267	2152	2565	2559	1955
711	Testosterone decanoate	441.336	1	3640.59	0.920593	C14607; C15808	C29H46O3	-H(-)	49	711	441.336	LBERVHLCXUMDOT-MPZZESAYSA-N	Lipids and lipid-like molecules	767	421	365	720	860	995	1168	828	804	1410	803	1210	800	1097	1100	1519	864	975	850	1727	1184	1043	1867	1516	793	640	1303	607	593	1078	920	907	864	872	1806	874
712	3beta-Hydroxy-4beta-methyl-5alpha-cholest-7-ene-4alpha-carboxylate	443.354	1	94856.2	0.868871	C04840; C08631	C29H48O3	-H(-)	100	712	443.354	UQFZKTIHSICSPG-DSHYQQBWSA-N	Lipids and lipid-like molecules	7	623	5	745	531	1064	847	1117	975	1767	721	1170	1202	1259	1694	2073	785	1191	494	3795	1905	1104	2838	2248	1085	587	2845	472	476	1012	1028	1146	973	865	4024	604
713	MC-207,110	445.236	1	295340	0.98333	C11602	C25H30N6O2	-H(-)	57	713	445.236	ZNHUFUZDUQRKBB-VXKWHMMOSA-N	Amino acids, peptides, and analogues	322	195	216	262	20207	29563	23005	17490	23391	16892	11768	19975	21969	24277	25718	21955	10965	14810	24622	36308	26461	52547	33523	14168	8527	12189	27132	12305	7819	22535	18917	18493	40084	31160	51334	14670
714	Stylisterol B	445.332	1	17739.1	0.960503	C14158; C14505; C14578; C15792	C28H46O4	-H(-)	100	714	445.332	SYIBODKBOJFRIS-AZEALQJHSA-N	Lipids and lipid-like molecules	216	571	114	794	1375	2471	1842	1498	1583	2703	1116	2015	1694	1584	2068	2600	1060	1766	1465	4629	2575	3395	4432	3133	1259	955	3748	1164	766	1578	1534	1725	2210	2015	5661	1166
715	3alpha,7alpha,12alpha-Trihydroxy-5beta-cholestanoate	449.327	1	5285.91	0.915552	C04722	C27H46O5	-H(-)	100	715	449.327	CNWPIIOQKZNXBB-SQZFNYHNSA-N	Lipids and lipid-like molecules	774	677	614	933	1104	1581	1567	1203	1208	1625	1330	1456	1284	1471	1554	1579	916	1552	1521	1862	1510	1733	1860	1329	1181	1082	1375	1201	955	1680	1394	1565	1592	1440	1930	1137
716	Phylloquinone	449.342	1	3330.32	0.923029	C02059	C31H46O2	-H(-)	100	716	449.342	MBWXNTAXLNYFJB-LKUDQCMESA-N	Lipids and lipid-like molecules	331	208	273	332	709	960	881	648	721	908	810	1043	766	914	886	1058	564	944	817	1176	937	993	1219	921	646	569	856	583	592	906	736	853	842	811	1202	677
717	Tetrahydrogeranylgeranyl diphosphate	453.216	1	16981.3	0.949457	C17440	C20H40O7P2	-H(-)	28	717	453.216	VZBGWADXUJSBTI-HMMYKYKNSA-N	Lipids and lipid-like molecules	451	396	496	474	2300	2359	2322	2140	2404	2515	2635	2533	2346	2052	2361	2339	2590	2243	2947	1882	2197	2327	2448	2237	2290	2065	2475	2175	1932	2626	2230	2325	2316	2422	2172	2642
718	Soyasapogenol B	457.368	1	4737.48	0.926352	C08980; C17421	C30H50O3	-H(-)	100	718	457.368	YOQAQNKGFOLRGT-UXXABWCISA-N	Lipids and lipid-like molecules	139	525	118	823	677	767	711	596	741	1083	938	889	829	879	1004	1016	795	849	607	1404	1082	850	1209	1156	800	695	1271	629	503	887	658	821	768	826	1514	592
719	Hydrocortisone caproate	459.275	1	19017	0.969765	C13422	C27H40O6	-H(-)	100	719	459.275	XZSVYVIYKBHVMV-FOMYWIRZSA-N	Lipids and lipid-like molecules	556	713	357	730	1597	1990	1648	1694	1800	2249	8009	1675	1793	1688	1878	1913	1654	1788	9788	1852	1918	1929	2123	2080	1733	2258	2219	1712	1476	2370	2086	1929	1843	1875	2411	1736
720	7-Methylthioheptyl glucosinolate	462.093	1	41928.7	0.968259	C17252	C15H29NO9S3	-H(-)	100	720	462.093	SJHVRBSHKTUXLG-LFHLZQBKSA-N	Carbohydrates and carbohydrate conjugates	54	193	48	262	1396	2151	4391	840	1331	1729	2014	2467	1998	2024	3947	5299	540	2376	2299	4971	3829	7087	6073	484	479	645	422	514	247	2742	2652	4072	1532	1474	5361	910
721	Scymnol	467.337	1	3820.48	0.933778	C16260	C27H48O6	-H(-)	100	721	467.337	DIPHJTHZUWDJIK-JPLAUYQNSA-N	Lipids and lipid-like molecules	1276	1205	1026	1347	1385	1676	1339	1382	1259	1364	1378	1293	1216	1420	1447	1706	1291	1730	1379	1726	1732	1607	1727	1840	1402	1442	1385	1397	1249	1493	1369	1596	1436	1428	2009	1612
722	Lupeol acetate	467.391	1	2604.84	0.865003	C08630	C32H52O2	-H(-)	19	722	467.392	ODSSDTBFHAYYMD-YOJQYFTNSA-N	Lipids and lipid-like molecules	837	812	791	1210	1205	995	1030	963	995	1186	1040	1370	964	1286	1262	1322	1077	1053	1097	1403	1302	1023	1363	1365	1019	1102	1322	1003	825	1192	872	1105	1340	905	1212	924
723	Glycyrrhetinate	469.333	1	6570.92	0.953174	C02283; C03930; C08950	C30H46O4	-H(-)	100	723	469.333	MPDGHEJMBKOTSU-YKLVYJNSSA-N	Lipids and lipid-like molecules	318	802	168	891	938	1243	1095	1168	1522	1208	1159	1378	1007	1225	1657	1364	1191	1180	1098	1619	1498	1239	1651	1546	1115	1140	1672	1160	1056	1173	1133	1131	1354	998	1639	1154
724	Tricaprilin	469.352	1	4108.02	0.922095	C13044; C20355	C27H50O6	-H(-)	71	724	469.352	VLPFTAMPNXLGLX-UHFFFAOYSA-N	Lipids and lipid-like molecules	1308	1416	840	1776	1301	1473	1389	1298	1492	1423	1500	1843	1275	1508	1457	1655	1621	1623	1271	1943	1566	1637	1752	1938	1477	1326	1493	1282	1209	1578	1644	1696	1342	1315	2065	1366
725	Eburicoic acid	469.367	1	3128.36	0.910686	C14495	C31H50O3	-H(-)	49	725	469.367	UGMQOYZVOPASJF-VVYMVFNCSA-N	Lipids and lipid-like molecules	657	741	412	1042	679	1003	792	968	827	1124	835	1062	932	1204	786	995	782	933	661	1074	1041	983	1548	1120	881	792	1045	708	667	872	745	1042	881	930	1456	750
726	Terfenadine	470.307	1	5822.93	0.984387	C07463	C32H41NO2	-H(-)	100	726	470.307	GUGOEEXESWIERI-UHFFFAOYSA-N	Benzenoids	664	539	414	744	835	1399	1023	933	1069	1124	969	1167	891	1121	919	1259	902	1097	1082	1151	1129	950	1596	1468	1139	864	1598	1051	864	1216	1014	1178	1347	1058	1374	1300
727	Gratiogenin	471.346	1	8500.85	0.966077	C08808; C08942; C16912; C16939; C17067; C17070; C17460	C30H48O4	-H(-)	30	727	471.346	DJFUSGZOFOKWFY-HVNJZMCDSA-N	Lipids and lipid-like molecules	191	1133	124	1170	890	1550	1223	1183	1391	1492	1342	1336	1470	1190	1481	1502	1336	1304	993	2168	1451	1212	2055	1804	1314	921	1866	1097	1000	1641	1112	1450	1246	1225	2227	1196
728	alpha-Tocopherol acetate	471.385	1	57688.4	0.797939	C13202; C17423	C31H52O3	-H(-)	100	728	471.385	ZAKOWWREFLAJOT-CEFNRUSXSA-N	Lipids and lipid-like molecules	17	1124	12	1214	1041	1856	1221	1527	1917	2327	1447	1796	1741	1748	2517	2438	1248	1677	766	4286	2901	1774	2956	3030	1838	1037	3455	997	997	1452	1543	1721	1348	1333	4997	1048
729	Sapelin A	473.363	1	11563.4	0.930334	C08634; C08789; C17419	C30H50O4	-H(-)	100	729	473.363	YHJGJKRPDMVIKU-YXSNRNNOSA-N	Lipids and lipid-like molecules	374	1856	392	2131	1747	2654	2544	2347	2069	3059	2035	2562	2587	2827	2570	2942	2040	2609	2055	4631	3286	2261	3755	3406	2418	2318	3203	1913	1867	2310	2198	2183	2322	2007	5520	2008
730	Progeldanamycin	474.286	1	23472.9	0.971708	C15823	C27H41NO6	-H(-)	100	730	474.286	JUHXUUXMSBXUJZ-ISVCGJASSA-N	Phenylpropanoids and polyketides	2761	2310	3176	2676	2428	4169	3092	2892	2157	4368	2195	4017	2591	3318	2957	5913	2406	4208	2382	6289	4974	2586	8555	6497	4057	2820	5001	2817	2435	3070	2958	3143	3191	2537	7986	2360
731	8-Methylthiooctyl glucosinolate	476.109	1	125521	0.96671	C17254	C16H31NO9S3	-H(-)	17	731	476.109	CWOJBEDMJKZKAB-JZYAIQKZSA-N	Carbohydrates and carbohydrate conjugates	17	183	14	201	1964	2864	5788	1128	1891	2586	2183	3066	2557	2801	4910	5759	656	2787	2992	4980	4920	10300	6435	629	629	812	632	664	309	3094	3056	4532	2377	2302	6409	1044
732	4-Methoxyglucobrassicin	477.065	1	690386	0.928405	C08423; C08424	C17H22N2O10S2	-H(-)	100	732	477.065	IIAGSABLXRZUSE-UFRBAHOGSA-N	Carbohydrates and carbohydrate conjugates	30	102	37	137	4091	6909	8077	4130	5376	7902	9971	7373	10521	14720	11775	10488	2294	9549	7153	15275	11569	12127	13230	1989	3043	3629	2458	1950	1925	13762	10265	8696	5722	7413	15318	6191
733	1-O-Hexadecyl-lyso-sn-glycero-3-phosphocholine	480.347	1	2608.58	0.964298	C13903	C24H52NO6P	-H(-)	100	733	480.347	VLBPIWYTPAXCFJ-UHFFFAOYSA-N	Lipids and lipid-like molecules	136	188	131	417	587	678	663	654	648	665	728	582	605	777	714	803	462	625	720	803	700	804	731	662	557	482	634	530	447	816	640	676	650	535	808	597
734	Asiatic acid	487.341	1	7164.29	0.94256	C08617; C17538; C17841; C17890	C30H48O5	-H(-)	38	734	487.341	JXSVIVRDWWRQRT-UYDOISQJSA-N	Lipids and lipid-like molecules	360	901	241	1046	1366	1509	2360	1395	1525	1830	1430	1768	1529	1606	1759	1828	1459	1615	1364	2103	1824	1441	1828	1930	1326	1418	1947	1090	1243	1549	1403	1525	1458	1317	2475	1485
735	Carmine	491.083	1	15662.8	0.936464	C11254	C22H20O13	-H(-)	100	735	491.083	DGQLVPJVXFOQEV-NGOCYOHBSA-N	Benzenoids	615	1133	662	1464	1554	1563	1855	1407	1670	1780	2131	1571	1588	1638	1705	1571	1735	1641	1986	1540	1427	1487	1507	1404	1588	1380	1559	1602	1734	1727	1523	1501	1686	1503	1729	1575
736	Aurantio-obtusin beta-D-glucoside	491.119	1	20164.7	0.968201	C10303	C23H24O12	-H(-)	100	736	491.119	LQYQYAJWKXDTHR-PHVGODQESA-N	Benzenoids	292	369	232	452	1337	1565	1662	1466	1656	1756	1504	1502	1501	1386	1721	1592	1514	1585	1906	1522	1459	1559	1618	1350	1462	1430	1393	1522	1293	1720	1616	1542	1505	1645	1493	1614
737	Caryoptin	491.229	1	13188.8	0.961289	C09070	C26H36O9	-H(-)	100	737	491.228	QVORLEZTALRJNW-SHZKAIFQSA-N	Organic acids and derivatives	285	298	307	320	1372	1590	1469	1536	1587	1736	1762	1558	1406	1447	1503	2192	1409	2107	1910	1466	1482	1535	1813	1750	1396	1298	1489	1448	1196	1898	1513	1741	1666	1424	1667	1532
738	Mucronine B	491.265	1	10816.2	0.964431	C10010	C28H36N4O4	-H(-)	36	738	491.265	HBLUGHSSFJXCOA-DEYBTNLMSA-N	Amino acids, peptides, and analogues	544	331	414	313	1415	1630	1237	1578	1534	1602	2083	1742	1316	1229	1601	1757	1410	1616	2321	1275	1511	1365	1790	1829	1265	1350	1588	1391	1268	1549	1220	1493	1656	1430	1405	1700
739	Glucohirsutin	492.104	1	169787	0.932335	C17271	C16H31NO10S3	-H(-)	100	739	492.104	GPMDJOOLATZDQL-AOUBEFMNSA-N	Carbohydrates and carbohydrate conjugates	27	51	26	70	3422	5750	6194	1593	2578	3863	4109	6004	5844	6338	6411	8750	394	6044	5314	9722	7907	8183	12591	427	444	561	420	551	158	7806	5974	7834	5073	4825	8473	3491
740	5-O-(Indol-3-ylacetyl-myo-inositol) D-galactoside	498.161	1	28327.5	0.97587	C04695	C22H29NO12	-H(-)	100	740	498.161	ZBIDXXVRKIWIKP-DULXVFQLSA-N	#N/A	94	219	90	280	1282	1631	1722	1614	1850	2084	2314	1644	1808	1733	1767	1840	2026	1747	2114	1819	1682	1621	1785	1619	1570	1868	1869	1698	1492	1856	1873	1561	1415	1780	1811	1813
741	Trisaccharide	503.162	1	100481	0.954404	C00492; C00713; C00883; C01835; C02160; C03367; C03661; C03848; C05404; C06219; C08239; C08243; C08251	C18H32O16	-H(-)	100	741	503.162	MUPFEKGTMRGPLJ-ZQSKZDJDSA-N	Carbohydrates and carbohydrate conjugates	198	724	148	619	4161	10338	5880	4084	5055	4905	5336	3936	4655	4123	4808	4127	4835	4320	4950	4523	4062	4616	4340	3659	3203	3336	3891	3529	2909	4412	3502	3212	3559	3265	5485	4285
742	Brusatol	519.187	1	62631.8	0.980552	C08754; C17529	C26H32O11	-H(-)	100	742	519.187	ZZZYHIMVKOHVIH-VILODJCFSA-N	Lipids and lipid-like molecules	8	56	7	61	1543	1500	1485	1655	1981	1728	1587	1586	1668	1835	1909	1632	1667	1681	1955	1484	1526	1818	1682	1404	1323	1351	1568	1488	1306	1586	1383	1373	1468	1546	1652	1570
743	7beta-Hydroxytaxusin	519.261	1	26254.6	0.970004	C20153	C28H40O9	-H(-)	100	743	519.261	CNURLWAZNDLNMK-CNZAUHOSSA-N	Lipids and lipid-like molecules	200	83	165	96	3339	2338	1714	4451	4166	3680	2403	2607	2181	1840	2716	2341	5505	1980	3689	1211	1649	1225	1431	3581	3940	4940	3404	5280	4110	1336	1070	1014	2105	1181	1667	2641
744	Cyasterone	519.297	1	10418.2	0.960314	C08816; C11300	C29H44O8	-H(-)	100	744	519.297	NEFYSBQJYCICOG-YSEUJXISSA-N	Lipids and lipid-like molecules	343	137	223	123	1478	1393	1180	1816	1746	1596	1317	1335	1183	1201	1492	1439	1873	1352	1800	1111	1190	1288	1456	1833	1425	1612	1599	1921	1543	1341	1028	1247	1221	1220	1342	1318
745	Isobrucein A	521.203	1	131307	0.982087	C08769	C26H34O11	-H(-)	100	745	521.203	NTBOLWMPXFGUHO-FTSLJJEMSA-N	Lipids and lipid-like molecules	4	45	3	68	1142	1400	1517	1601	2091	1766	1370	1480	1779	2334	2137	1838	1594	1824	1804	1768	1586	2036	2126	1404	1300	1373	1612	1313	1137	1902	1648	1635	1738	1816	2245	1695
746	Pikromycin	524.322	1	3389.01	0.942459	C11999; C20739	C28H47NO8	-H(-)	100	746	524.322	UZQBOFAUUTZOQE-VSLWXVDYSA-N	Carbohydrates and carbohydrate conjugates	292	347	293	347	667	694	717	735	821	921	731	793	690	861	822	732	706	888	776	811	760	676	840	913	948	725	924	802	608	921	725	716	736	696	722	709
747	L-Oleandrosyl-oleandolide	529.302	1	16908.8	0.962772	C11992	C27H46O10	-H(-)	100	747	529.302	WBLQSDZLJBWRPL-WQMXQYMNSA-N	Phenylpropanoids and polyketides	2564	783	1532	638	3399	4153	3644	4073	3535	3948	3198	3198	2053	2468	3441	3716	2813	3669	4462	3307	3322	2582	5641	5779	2444	2256	3562	2894	1869	3966	2897	3141	3431	2591	3504	3552
748	Cucurbitacin H; Integerrenine	533.313	1	14550.2	0.946407	C08799; C08863; C08864; C08876; C10005	C30H46O8; C31H42N4O4	-H(-); -H(-)	100	748	533.313	ABNDMUIXCBUBLO-REQJDAJISA-N	Lipids and lipid-like molecules	252	55	177	74	1365	1412	1470	1323	1428	1246	1082	1301	717	694	1254	953	1541	781	1624	993	1251	2511	1187	1885	1548	1359	2216	1569	1172	1268	1058	1287	1351	1293	1555	989
749	Adonitoxin; Glycochenodeoxycholate 7-sulfate	549.273	1	13007	0.969356	C08843; C08850; C08858; C15559	C26H43NO8S; C29H42O10	.F(-) [+1]; -H(-)	10	749	549.273	ARANEVHRNOGYRH-BBNLJEPRSA-N	Lipids and lipid-like molecules	247	101	188	131	1271	1413	1571	1266	1393	1648	1228	1402	1071	1067	1502	1243	1676	1453	1962	1198	1311	1278	1528	1850	1455	1371	1872	1364	1194	1345	987	1225	1289	1023	1421	1075
750	Apigenin 7-O-[beta-D-apiosyl-(1->2)-beta-D-glucoside]	563.141	1	54003.1	0.976815	C04858; C10110; C10181; C16491; C16803	C26H28O14	-H(-)	100	750	563.141	NTDLXWMIWOECHG-YRCFQSNFSA-N	Phenylpropanoids and polyketides	136	125	125	133	1515	2108	3183	1579	1713	2479	1384	1781	1697	1866	1711	1897	1723	1991	1853	1551	1514	1586	1878	1780	1335	1245	1445	1413	1129	1624	1511	1522	1659	1698	1696	1648
751	UDP-hexose	565.048	1	65245.3	0.904079	C00029; C00052; C03733	C15H24N2O17P2	-H(-)	100	751	565.048	HSCJRCZFDFQWRP-JZMIEXBBSA-N	Nucleosides, nucleotides, and analogues	63	100	54	119	3312	2944	3099	3202	3492	3285	3494	3161	2860	3034	4127	3892	3426	4210	4612	3095	3601	3083	3859	3078	2652	2611	2700	2534	2309	2753	2958	2985	2768	2531	3449	3125
752	Zeaxanthin	567.42	1	6461.25	0.922074	C06098; C08599; C08601; C15933; C16270	C40H56O2	-H(-)	100	752	567.42	JKQXZKUSFCKOGQ-QAYBQHTQSA-N	Lipids and lipid-like molecules	741	39	669	34	321	1013	1405	488	388	2663	307	1648	999	774	1322	2825	821	1582	507	3666	3113	1567	3354	1567	912	661	1576	322	258	673	940	1259	861	632	4375	433
753	Eleutheroside A	575.431	1	6107.92	0.922152	C20785	C35H60O6	-H(-)	100	753	575.431	NPJICTMALKLTFW-IFBGTAHNSA-N	Lipids and lipid-like molecules	248	397	204	406	663	1733	1421	827	565	3565	394	2097	742	793	988	3800	516	1516	641	4021	3604	1157	4581	2767	1167	779	3089	533	337	942	992	1621	1224	821	6253	852
754	Violanthin	577.157	1	1.03959e+06	0.965692	C10196; C12627; C12628; C16802; C16981	C27H30O14	-H(-)	11	754	577.157	MVOUGOXRXQDXDC-RSPRXDBDSA-N	Phenylpropanoids and polyketides	10	1	9	2	4034	3865	5033	4443	4771	5310	3914	4506	3555	4554	4799	5043	3838	5222	5482	4581	4512	5173	6010	4905	3664	3208	3610	3922	2758	5323	4700	5108	4591	4873	4053	4192
755	Gambiriin A1	579.15	1	41983.4	0.858636	C17772; C17773; C17774	C30H28O12	-H(-)	100	755	579.15	AAOPKIFUFWCDQZ-KEQINOFFSA-N	Phenylpropanoids and polyketides	45	17	38	17	1123	1363	1485	1629	1637	2017	1420	1654	1593	2027	1755	1629	1347	1589	1946	1878	1450	1985	2336	2105	1202	1288	1278	1608	1004	2472	1352	2230	1636	1829	1267	1451
756	1,2-Bis-O-sinapoyl-beta-D-glucoside	591.172	1	174791	0.985267	C04275; C12629	C28H32O14	-H(-)	64	756	591.172	KQDOTXAUJBODDM-STUNQXDBSA-N	Phenylpropanoids and polyketides	137	1	104	1	1498	1211	1417	1264	1593	1818	1907	1296	1289	1164	1627	1327	1305	1368	1783	1649	1109	1145	1382	1127	1230	1106	1086	1942	1111	2013	1552	1364	1440	1352	1257	1534
757	Isoorientin 2''-O-rhamnoside	593.152	1	1.42726e+06	0.870565	C03870; C04024; C04199; C08064; C10195; C10513; C12630; C17600	C27H30O15	-H(-)	100	757	593.152	IUYFTHKQEWZTHY-LQQQXCKLSA-N	Phenylpropanoids and polyketides	5	66	4	84	13699	14512	18062	16195	19271	18630	15627	16248	12512	17662	19016	17929	13782	19317	19786	16153	16873	21124	23464	15770	12643	10775	12815	12899	8423	19846	15812	18918	17102	18177	15474	14179
758	Papyriferic acid	603.391	1	4962.29	0.952659	C08632; C08953	C35H56O8	-H(-)	100	758	603.391	RLVAVWQAAQFUOP-GNYBQDBLSA-N	Lipids and lipid-like molecules	130	293	132	266	652	987	842	622	684	1113	691	1099	775	893	1081	1347	562	1164	890	1670	1122	1134	1669	1123	784	704	966	634	522	832	734	937	898	783	1785	918
759	Diosmin	607.166	1	17248	0.972176	C10039; C10382; C17834; C17837	C28H32O15	-H(-)	100	759	607.166	GZSOSUNBTXMUFQ-YFAPSIMESA-N	Phenylpropanoids and polyketides	33	111	34	129	1108	2087	1306	1238	1430	1556	1889	1153	1004	1149	1426	1331	1271	1134	1432	1366	1172	1333	1409	1128	978	916	1141	1166	988	1501	1046	1159	1217	1295	1280	1209
760	Delphinidin 3-O-sophoroside	626.15	1	9596.26	0.981498	C16307; C16312; C20496	C27H31O17	-H(-)	64	760	626.15	UYLDMCQVSGIZMI-ROOKUYIKSA-O	Phenylpropanoids and polyketides	48	335	54	364	1111	1207	1246	1180	1199	1200	1332	1036	1176	1623	1206	1013	1289	1131	1367	1084	1058	1238	1169	1077	1218	1046	1169	1114	1006	1297	1223	1283	1099	1345	1249	1199
761	Oleanoic acid 3-O-glucuronide	631.385	1	10048	0.91068	C08964	C36H56O9	-H(-)	100	761	631.385	IUCHKMAZAWJNBJ-RCYXVVTDSA-N	Lipids and lipid-like molecules	59	72	47	70	868	1255	1136	569	589	1284	746	1215	804	891	1157	1508	498	1327	981	1968	1741	1228	1983	1196	672	716	1054	566	499	1316	977	1169	1120	770	2465	800
762	all-trans-Heptaprenyl diphosphate	653.376	1	13247.4	0.973552	C04216; C17436	C35H60O7P2	-H(-)	37	762	653.376	LSJLEXWXRKTZAJ-YUIIPXGZSA-N	Lipids and lipid-like molecules	254	117	228	94	1062	1437	1260	1086	1022	1479	901	1455	897	877	1178	1503	1112	1481	1257	1340	1346	1119	1941	2533	1112	1118	1798	1006	852	1070	758	980	942	707	1257	744
763	Erythromycin B	716.459	1	10651.7	0.972381	C06653	C37H67NO12	-H(-)	100	763	716.459	IDRYSCOQVVUBIJ-PPGFLMPOSA-N	Carbohydrates and carbohydrate conjugates	246	173	252	189	2124	4511	2727	1786	1514	3148	1991	3978	1987	3096	2638	5508	1288	5168	2467	3951	3182	1964	5273	4654	2004	2038	3165	1868	1523	2426	2094	2548	2349	1862	3815	2322
764	3'-Deoxydihydrostreptomycin 6,3''-bis-phosphate	726.212	1	74412	0.979952	C04660; C04709	C21H43N7O17P2	-H(-)	100	764	726.212	PVNBAUCASRIGKP-AWMQQPGVSA-N	Carbohydrates and carbohydrate conjugates	4	100	4	159	899	1567	1469	1217	2288	1232	1779	1145	1220	1678	1673	1228	1657	1359	1519	1036	1698	1556	1269	1051	926	973	1304	999	1013	1253	1134	1210	1407	1339	1356	1291
765	Narasin B	761.484	1	20393.2	0.967611	C15834	C43H70O11	-H(-)	100	765	761.484	FBLJTCGAXDPRJH-BEXJWCDGSA-N	Lipids and lipid-like molecules	422	35	408	45	1429	3046	2738	1447	1228	3581	1269	5275	2114	2360	2647	5406	1069	3483	1588	7456	6344	1236	12745	6078	1729	1412	3035	859	656	2945	2586	3581	2477	1385	8452	3044
766	Halstoctacosanolide A	843.528	1	9147.96	0.952764	C15766	C48H76O12	-H(-)	27	766	843.528	GQHNSYURZJAIPC-IFGCVEQJSA-N	Phenylpropanoids and polyketides	373	145	354	225	1286	2691	2465	1336	1115	4430	1050	3783	1281	1348	1604	5734	812	2664	1295	6089	5430	2003	7783	4661	1601	1161	2897	851	627	2173	1672	2593	2458	1513	7370	1937
767	alpha-Chaconine	850.496	1	8828.58	0.964326	C10796	C45H73NO14	-H(-)	100	767	850.496	TYNQWWGVEGFKRU-AJDPQWBVSA-N	Lipids and lipid-like molecules	684	80	637	99	2018	4000	2830	3151	1969	7147	1849	5624	1948	2063	2643	5254	2351	3647	2430	5589	6798	2438	9136	15798	3532	2579	7958	2007	1518	3071	2390	2954	3188	2235	7552	3646
768	Demethylmacrocin	886.48	1	8583.5	0.951898	C02400	C44H73NO17	-H(-)	100	768	886.48	ALZAOGATQMXJKX-UQRCBBHQSA-N	Carbohydrates and carbohydrate conjugates	528	50	389	60	2760	2475	2396	4065	2477	5335	2312	4009	1584	2041	2268	4663	1491	3592	2955	4839	4201	1964	11103	5942	1967	2239	2797	2003	1661	3943	3587	4374	5379	3082	4126	5668
769	Macrocin	900.495	1	7134.07	0.959537	C00744	C45H75NO17	-H(-)	100	769	900.495	UFUYRGNJTFAODM-HQCAVAADSA-N	Carbohydrates and carbohydrate conjugates	303	66	461	56	1901	2122	1712	3361	1750	3719	1901	2989	1226	1469	1727	3761	1117	2574	1925	4318	3812	1755	8366	4013	1403	1691	2007	1609	1407	2822	2926	2956	4443	2690	3396	5192
770	Kaempferol 3-O-[6-(4-coumaroyl)-beta-D-glucosyl-(1->2)-beta-D-glucosyl-(1->...	917.235	1	11940.7	0.864024	C12636	C42H46O23	-H(-)	100	770	917.236	LFLDSGWMOQHQIG-WRICPQPISA-N	Phenylpropanoids and polyketides	49	8	57	10	657	574	1233	1093	1110	888	640	888	815	1158	1129	964	980	1366	1586	557	861	1502	966	621	610	629	660	577	484	1043	1128	1138	1090	1142	547	890
771	Colubrin	939.495	1	8257.12	0.92073	C08936; C08962; C13837	C48H76O18	-H(-)	100	771	939.495	ZIUOAVDHMLNSNY-QGEXMSAISA-N	Lipids and lipid-like molecules	1871	673	1918	656	3721	5259	3608	4404	3195	4896	3472	4363	3026	3121	3765	5159	3280	4895	3865	5438	5056	2922	7062	6964	3061	3141	4145	3059	2464	4356	3481	4113	4490	3038	5480	4430
772	Carnosifloside III	941.511	1	15919.9	0.882632	C08791; C08923; C08958; C08963; C08983	C48H78O18	-H(-)	100	772	941.511	UHWXBWBOPABGIG-XRSBSPCNSA-N	Lipids and lipid-like molecules	4224	639	3734	611	3377	9647	9838	5642	4324	9847	3818	10996	3624	4166	6486	8713	4639	7538	5435	9698	8870	6326	17110	31238	5944	4037	10692	3057	2850	6992	5943	6774	5809	5570	16741	5413
773	Carnosifloside VI	943.528	1	10860	0.679374	C08792	C48H80O18	-H(-)	100	773	943.528	WWDDJYHDZQBKBW-POHRRBMFSA-N	Lipids and lipid-like molecules	1026	213	963	248	1842	5280	3708	2892	2093	5479	2269	5482	1972	2264	3312	5693	2265	3781	2411	5800	4830	3393	8572	10518	2422	1977	5261	1680	1453	3387	2930	3618	3176	2489	7146	3010
774	Cobalt-precorrin 5A	962.264	1	5047.78	0.949331	C16242	C45H52CoN4O16	-H(-)	25	774	962.264	FMPRUTAGAUSVOA-IBAGIMPYSA-L	Organoheterocyclic compounds	95	117	92	102	868	4202	1186	971	943	1217	1597	921	689	749	1438	1099	1132	1026	1475	1124	1348	1140	1374	922	788	774	773	899	856	1071	898	1138	858	918	985	935
775	Prorocentrolide	978.595	1	3794.75	0.928126	C20023	C56H85NO13	-H(-)	100	775	978.595	XZXZSKRRHGFIQS-YFHRIDBKSA-N	Organoheterocyclic compounds	317	196	410	126	351	1370	1400	530	386	3444	327	1673	563	621	1066	4261	386	1649	506	3978	3599	1378	4926	2066	634	380	2173	336	188	719	750	1315	722	522	4651	528
[truncated: 58 more columns]

## Sheet: 2_Roots_raw
Raw metabolite data for root samples														sample name: treatment_timepoint_injection number_replicate, values are relative peak heights
index	annotation name	ionMz	ionActive	ionAverageInt	ionQualTIC	Top annotation ids	Top annotation formula	Top annotation ion	Top annotation score	ionIdx	ionMz	inchi	custom class	expblank_exctrl_1_2413	expblank_exctrl_1_2623	expblank_exctrl_2_2415	expblank_exctrl_2_2621	mock_tp1_2201_1	mock_tp1_2201_2	mock_tp1_2201_3	mock_tp1_2201_4	mock_tp1_2201_5	mock_tp2_2203_1	mock_tp2_2203_2	mock_tp2_2203_3	mock_tp2_2203_4	mock_tp2_2203_5	mock_tp3_2205_1	mock_tp3_2205_2	mock_tp3_2205_3	mock_tp3_2205_4	mock_tp3_2205_5	mock_tp4_2207_1	mock_tp4_2207_2	mock_tp4_2207_3	mock_tp4_2207_4	mock_tp4_2207_5	mock_tp5_2209_1	mock_tp5_2209_2	mock_tp5_2209_3	mock_tp5_2209_4	mock_tp5_2209_5	mock_tp6_2211_1	mock_tp6_2211_2	mock_tp6_2211_3	mock_tp6_2211_4	mock_tp6_2211_5	mock_tp7_2213_1	mock_tp7_2213_2
1	Acrolein	55.0183	1	5456.79	0.800456	C01471; C05986	C3H4O	-H(-)	100	1	55.0183	HGINCPLSRVDWNT-UHFFFAOYSA-N	Carbonyl compounds	171	319	189	317	1604	1501	1598	1466	1504	1406	1656	1358	1420	1442	1401	1574	1403	1550	1338	1292	1233	1282	1439	579	1386	1495	1401	1047	1384	1389	1304	1193	1194	1496	1494	1461
2	Glyoxal	56.9977	1	968.004	0.572836	C14448	C2H2O2	-H(-)	100	2	56.9977	LEQAOMBKQFMDFZ-UHFFFAOYSA-N	Carbonyl compounds	38	113	32	132	338	322	497	471	402	422	315	357	421	305	246	657	483	429	341	516	325	464	453	267	377	348	325	183	284	289	237	183	212	240	335	317
3	Acetone	57.0342	1	18309.3	0.705397	C00207; C00479; C02001; C11506; C11507; C15508	C3H6O	-H(-)	100	3	57.0342	CSCPPACGZOOCGX-UHFFFAOYSA-N	Carbonyl compounds	783	1159	836	1437	6376	9727	7190	6205	7377	7756	9362	5470	6234	7386	5190	7089	5762	7750	5079	3592	5347	5529	5885	1860	6805	5465	6429	4482	5856	6186	6286	7225	5430	7234	6209	5065
4	Potassium acetate	58.0057	1	763.891	0.507145	C12554	C2H3O2.	-H(-)	100	4	58.0057	SCVFZCLFOSHCOH-UHFFFAOYSA-M	Organic acids and derivatives	40	134	95	157	300	323	291	346	274	289	358	264	258	281	323	227	382	328	259	353	348	340	240	127	244	307	313	229	333	440	333	155	278	332	323	330
5	Acetamide	58.0294	1	2180.96	0.678718	C06244; C06735; C11489	C2H5NO	-H(-)	100	5	58.0294	DLFVBJFMPXGRIB-UHFFFAOYSA-N	Organic acids and derivatives	128	150	114	182	711	827	655	649	701	795	857	432	666	683	711	872	721	804	767	673	644	573	562	284	754	856	868	463	689	674	720	526	557	750	609	603
6	Acetatic acid	59.0135	1	285339	0.923019	C00033; C00266	C2H4O2	-H(-)	100	6	59.0135	QTBSBXVTEAMEQO-UHFFFAOYSA-N	Organic acids and derivatives	38162	41415	45847	54744	217591	216335	226092	205798	194552	166761	214218	166891	193970	211217	201575	202173	214254	221769	219109	167656	182362	162847	190353	79057	215952	202395	218868	144199	210414	217099	195925	180987	137452	180747	188095	221030
7	Propanol	59.0495	1	3110.99	0.187069	C01845; C05979	C3H8O	-H(-)	100	7	59.0495	KFZMGEQAYNKOFK-UHFFFAOYSA-N	Alcohols and polyols	920	426	1256	771	2903	2840	2020	3210	2283	3013	2781	2598	2729	3304	3191	2530	3067	2639	2390	2342	2045	2634	2976	1703	2610	3457	2834	2223	2985	2865	2993	2554	2605	2782	2785	2602
8	Ethylene glycol	61.0293	1	955.081	0.759034	C01380; C15588	C2H6O2	-H(-)	100	8	61.0293	LYCAIKOWRPUZTN-UHFFFAOYSA-N	Alcohols and polyols	609	976	553	439	886	707	943	576	628	677	1058	729	650	1057	897	1050	1034	932	508	750	612	876	764	407	552	755	964	558	786	713	870	729	414	857	685	725
9	Butynal	67.0187	1	3669.8	0.673028	C06145; C14275	C4H4O	-H(-)	100	9	67.0187	OGQNOIVDVXRWRE-UHFFFAOYSA-N	Carbonyl compounds	336	1128	185	1532	1315	1654	1425	1053	1184	1201	1265	841	979	948	1253	1483	1088	1200	1388	969	947	983	1044	404	1269	1025	1169	764	1034	1196	1139	870	694	1080	1001	876
10	Butynol	69.0346	1	3352.45	0.715693	C06146; C17721; C19377; C20701	C4H6O	-H(-)	100	10	69.0346	OTJZCIYGRUNXTP-UHFFFAOYSA-N	Acetylides	779	1274	917	1044	1359	1676	1604	1825	1271	1324	1966	1259	1290	1851	1431	1573	1653	1767	1309	1176	1663	1704	1293	882	1605	1694	1657	1260	1654	2020	1398	1535	1026	1501	1614	1434
11	Acrylamide	70.0296	1	10941.4	0.822366	C01659	C3H5NO	-H(-)	100	11	70.0296	HRPVXLWXLXDGHG-UHFFFAOYSA-N	Organic acids and derivatives	89	78	52	74	1445	1463	1140	1174	1071	1075	1044	918	1008	1029	1249	1203	1297	1099	1321	841	1150	1071	1214	504	1209	967	1055	951	1347	1414	1292	1204	968	1175	968	836
12	Propenoic acid C3:1	71.0138	1	70579.9	0.506147	C00511; C00546; C19246; C19297; C19440	C3H4O2	-H(-)	100	12	71.0138	NIXOWILDQLNWCW-UHFFFAOYSA-N	Organic acids and derivatives	2277	1521	2193	1828	15588	16041	16725	16507	14830	13666	15104	12312	14635	13048	14548	16631	15589	14961	16117	12081	12807	12499	14396	5593	14884	12565	13644	9618	15044	14764	14308	12472	8980	12245	14257	15581
13	Butanal	71.0506	1	2579.31	0.644596	C01412; C02845; C19237	C4H8O	-H(-)	100	13	71.0506	ZTQSAGDEMFDKMZ-UHFFFAOYSA-N	Carbonyl compounds	1006	1296	1066	832	1650	1745	1665	1741	2036	1170	1792	1211	1547	1485	2087	1982	1869	1407	1599	1517	1444	968	1862	893	1713	1529	1389	1120	1736	1183	1555	1550	1132	1477	1714	1103
14	Iminoacetate	72.0089	1	7240.97	0.765459	C15809	C2H3NO2	-H(-)	100	14	72.0089	TVMUHOAONWHJBV-UHFFFAOYSA-N	Organic acids and derivatives	160	119	144	136	1054	1263	1022	951	1001	1061	1210	749	1049	1107	1114	1248	870	953	1055	770	969	918	1231	508	1343	1197	1236	1077	1601	1387	1717	1484	1313	1502	1006	964
15	Glyoxylic acid	72.9933	1	15678.1	0.723077	C00048	C2H2O3	-H(-)	100	15	72.9933	HHLFWLYXYJOTON-UHFFFAOYSA-N	Organic acids and derivatives	1371	951	1364	1479	2653	2317	2653	2828	2304	2319	2683	2289	2383	2395	2294	2300	2659	2290	2441	2215	2104	2314	2614	1458	2434	2243	2219	1724	2333	2315	2188	2015	1586	1856	2368	2410
16	Ethylnitronate	73.0179	1	1138.16	0.582309	C18091	C2H4NO2	-H(-)	100	16	73.0179	YERBBVNYIKLXDM-UHFFFAOYSA-N	Organic 1,3-dipolar compounds	41	86	56	89	375	408	364	448	263	248	377	293	333	269	314	441	389	281	264	281	268	290	317	136	322	276	344	244	340	327	280	336	248	292	335	354
17	C3:0 (Propionic acid)	73.0293	1	18272	0.662347	C00163; C00424; C00937; C00969; C05235; C05999; C10920; C17530	C3H6O2	-H(-)	100	17	73.0293	XBDQKXXYIPTUBI-UHFFFAOYSA-N	Organic acids and derivatives	652	878	635	1103	5551	6170	5674	5451	5646	4976	5347	4864	5243	4593	5127	5069	5399	5068	5327	4266	5109	4760	5249	2086	4896	5436	5069	3712	5478	5208	4573	5110	3694	5171	4834	5078
18	Glycine	74.0247	1	19904.8	0.763119	C00037; C01837; C06808; C19445	C2H5NO2	-H(-)	100	18	74.0247	DHMQDGOQFOQNFH-UHFFFAOYSA-N	Amino acids, peptides, and analogues	431	560	419	372	6242	5634	5087	5286	5402	4656	6214	3812	4859	4986	5425	4949	5265	4981	4582	4604	5711	4575	5829	1666	6554	5881	6539	5183	7189	6885	7755	6711	5748	6872	3755	4542
19	Thioacetic acid	74.991	1	751.946	0.698637	C01857	C2H4OS	-H(-)	100	19	74.991	DUYAAUVXQSMXQP-UHFFFAOYSA-N	Organic acids and derivatives	51	112	5	42	287	276	248	292	277	244	262	151	253	259	225	329	225	229	254	301	257	301	236	134	276	223	263	197	164	290	298	199	262	216	262	308
20	Glycolate	75.0089	1	9689.92	0.827974	C00160	C2H4O3	-H(-)	100	20	75.0089	AEMRFAOFKBGASW-UHFFFAOYSA-N	Organic acids and derivatives	633	474	717	681	2597	2597	2525	3428	3149	2237	2803	2498	2561	2320	2373	2879	2959	2927	2796	2392	2294	2641	2645	1219	2376	2373	2538	1567	2383	2515	2256	2457	1521	2326	2458	2595
21	Propanediol	75.045	1	2097.81	0.0265715	C00583; C02457; C02912; C02917	C3H8O2	-H(-)	100	21	75.045	DNIAPMSPPWPWGF-UHFFFAOYSA-N	Alcohols and polyols	2157	2154	2271	2068	2031	1371	1661	2245	1699	1483	1650	1957	1352	1896	2291	1478	1294	1558	2596	1760	1684	1941	2025	992	2040	1910	1752	1642	2427	1806	1754	1908	1333	1920	1658	2001
22	DMSO	77.006	1	8498.36	0.669052	C00928; C11143	C2H6OS	-H(-)	100	22	77.006	DGVVWUTYPXICAM-UHFFFAOYSA-N	Organosulfur compounds	3881	4561	3246	2963	2756	2587	2920	2394	2084	3013	3471	3376	2579	2924	2950	4502	2148	2413	2926	1556	3248	1675	2926	1635	4255	1914	2265	2021	2547	2415	2762	2845	2318	2677	3390	3361
23	Cyclopentanone	83.0505	1	6879.12	0.623016	C00557; C07330	C5H8O	-H(-)	100	23	83.0505	BGTOWKSIORTVQH-UHFFFAOYSA-N	Carbonyl compounds	4480	4907	4061	5456	4327	4688	3933	4370	3626	3734	4558	4732	3894	5264	5362	3945	4124	3899	4802	4535	3902	3622	4250	2066	3695	4447	4597	3479	4944	5323	4517	4580	3038	4319	3654	4470
24	Acetone cyanohydrin	84.0454	1	7165.24	0.832862	C02659	C4H7NO	-H(-)	100	24	84.0454	MWFMGBPGAXYFAR-UHFFFAOYSA-N	Alcohols and polyols	37	66	44	97	1932	1882	1348	1315	1381	1266	1461	1180	1339	1294	1644	1470	1582	1536	1701	1090	1344	1051	1474	530	1045	971	1077	790	1334	1286	1165	1122	863	992	1125	1333
25	Succinic aldehyde	85.0295	1	32468.6	0.66068	C00741; C01770; C01771; C02497; C16267; C16835; C19201; C19309; C19443	C4H6O2	-H(-)	100	25	85.0295	QSJXEFYPDANLFS-UHFFFAOYSA-N	Carbonyl compounds	2338	4991	3383	6339	10173	12224	12288	10230	11282	9642	11482	9389	10870	14952	10533	11568	11380	13381	10931	7451	8788	8750	9570	3728	13060	10917	12587	8700	12725	10655	10289	9972	7951	10212	10225	10591
26	Prenol	85.0661	1	1233.73	0.626789	C01390; C01949; C02020; C02223; C07329	C5H10O	-H(-)	100	26	85.0661	ASUAYTHWZCLXAN-UHFFFAOYSA-N	Alcohols and polyols	383	606	504	865	904	802	893	891	835	793	1029	757	765	885	729	1216	744	816	620	687	652	720	849	506	895	780	623	695	956	875	912	768	568	912	1104	688
27	Dehydroalanine	86.0248	1	4599.29	0.669692	C02218; C06695; C20253	C3H5NO2	-H(-)	100	27	86.0248	UQBOJOOOTLPNST-UHFFFAOYSA-N	Amino acids, peptides, and analogues	454	359	503	450	1429	1722	1279	1290	1484	1617	1627	1443	1110	1695	1843	1557	1578	1355	1385	1328	1312	1030	1320	700	1426	1127	1547	953	1853	1390	1259	1250	1082	1343	1323	1159
28	4-Aminobutyraldehyde	86.0609	1	448.401	0.71248	C00555; C03219; C14452; C19332; C20315; C20339	C4H9NO	-H(-)	100	28	86.0609	DZQLQEYLEYWJIB-UHFFFAOYSA-N	Carbonyl compounds	43	45	56	79	186	175	263	198	184	365	382	136	272	164	330	188	133	234	301	244	71	249	412	111	268	185	104	130	275	197	278	212	215	130	235	261
29	Pyruvate	87.0088	1	51950.3	0.943892	C00022; C00222; C12069; C20363	C3H4O3	-H(-)	100	29	87.0088	LCTONWCANYUPML-UHFFFAOYSA-N	Organic acids and derivatives	517	2856	481	3650	8635	6835	7297	7011	7257	5873	9243	5735	6564	5269	6242	8847	7609	8309	8170	6210	7203	6492	7237	2481	7400	6808	7348	5185	7121	7061	6744	6883	4200	5287	6598	7628
30	C4:0 (Butyric acid)	87.0453	1	3592.16	0.74654	C00246; C00466; C00810; C00849; C01769; C02632; C14440	C4H8O2	-H(-)	100	30	87.0453	FERIUCNNQQJTOY-UHFFFAOYSA-N	Lipids and lipid-like molecules	700	1249	682	960	2001	2145	1815	1546	1735	1507	2016	1544	1542	1915	1916	1863	1847	1953	1703	1245	1492	1368	1368	495	2022	1659	1875	1306	1854	2269	1612	1810	1075	1996	1496	1458
31	Dimethylurea	87.0563	1	802.318	0.634438	C16364; C19281; C19779	C3H8N2O	-H(-)	100	31	87.0563	MGJKQDOBUOMPEZ-UHFFFAOYSA-N	Organic acids and derivatives	86	236	115	135	289	491	504	317	308	303	446	281	315	396	474	534	407	380	394	257	366	323	367	244	421	333	379	356	522	462	301	339	269	370	355	398
32	Oxamic acid	88.0042	1	2108.72	0.702621	C01444	C2H3NO3	-H(-)	100	32	88.0042	SOWBFZRMHSNYGE-UHFFFAOYSA-N	Amino acids, peptides, and analogues	377	533	424	425	283	332	425	348	292	454	496	419	382	600	458	558	482	435	493	411	423	332	420	302	415	330	262	339	523	449	298	411	321	423	405	454
33	Alanine	88.0405	1	19035.3	0.856122	C00041; C00099; C00133; C00213; C01401; C01537; C02116; C11488	C3H7NO2	-H(-)	100	33	88.0405	QNAYBMKLOCPYGJ-REOHCLBHSA-N	Amino acids, peptides, and analogues	101	127	148	120	2459	2652	2840	2858	2792	1822	2624	1931	2549	2305	2780	2367	2823	2655	2731	1852	2224	1738	2517	883	2358	2298	2353	1593	2579	2913	2360	2272	1684	2185	1832	2348
34	Oxalic acid	88.9881	1	4902.38	0.786562	C00209; C18586	C2H2O4	-H(-)	100	34	88.9881	MUBZPKHOEPUJKR-UHFFFAOYSA-N	Organic acids and derivatives	255	267	180	350	734	959	955	742	701	723	845	565	742	859	834	1053	787	741	1074	835	744	759	859	419	940	721	728	654	851	914	937	896	644	647	660	776
35	Propanethial S-oxide	89.0072	1	1049.04	0.419628	C08389	C3H6OS	-H(-)	100	35	89.0072	BAZSXBOAXJLRNH-UHFFFAOYSA-N	Organosulfur compounds	47	95	40	40	355	375	343	294	243	234	406	206	298	236	340	272	299	264	301	251	237	276	246	117	319	262	313	248	274	344	343	257	240	210	328	330
36	Lactate	89.0247	1	34010.1	0.895105	C00184; C00186; C00256; C00577; C01013; C01432; C02154; C02426	C3H6O3	-H(-)	100	36	89.0247	RXKJFZQQPQGTFL-UHFFFAOYSA-N	Carbohydrates and carbohydrate conjugates	375	1478	404	853	5948	5656	6005	5928	5878	4683	6306	4533	5353	5026	5398	5794	5872	6412	5887	4861	5393	4659	6224	1864	6174	5695	6388	3777	6488	5872	5735	4985	3490	4383	5098	6094
37	Methylazoxymethanol	89.0353	1	8039.38	0.926124	C02390; C06384; C20301	C2H6N2O2	-H(-)	100	37	89.0353	BJNBRIBHKLJMAG-ARJAWSKDSA-N	Organic 1,3-dipolar compounds	54	343	69	186	1785	1809	1833	1382	1544	1476	2248	930	1513	1731	1545	1815	1775	1716	1271	1220	1494	1462	1798	418	2739	2032	2331	2130	2275	2649	3105	2386	2779	2357	1178	1377
38	Thioglycolic acid	90.9864	1	623.98	0.416412	C02086	C2H4O2S	-H(-)	100	38	90.9864	CWERGRDVMFNCDR-UHFFFAOYSA-N	Organic acids and derivatives	106	316	67	475	426	477	514	435	422	282	445	320	391	484	328	401	374	439	500	373	470	325	505	108	387	316	591	253	379	358	435	397	278	507	379	439
39	Glycerol	91.0401	1	1264.59	0.758732	C00116	C3H8O3	-H(-)	100	39	91.0401	PEDCQBHIVMGVHV-UHFFFAOYSA-N	Carbohydrates and carbohydrate conjugates	192	148	132	277	386	458	438	513	453	567	413	566	493	515	391	574	481	481	505	720	614	620	374	716	491	448	547	978	662	580	390	480	487	342	492	596
40	Phenol	93.0346	1	7333.08	0.73459	C00146; C01782; C15584	C6H6O	-H(-)	100	40	93.0346	ISWSIDIOOBJBQZ-UHFFFAOYSA-N	Benzenoids	862	1046	843	1097	3975	3586	3530	3393	3834	3367	3671	2973	3322	3003	3420	3932	3542	4104	3917	3314	2862	2553	3270	1602	3606	3102	3411	2549	3401	3778	3418	3326	2289	3116	3189	3654
41	Hydroxypyridine	94.0304	1	1419.26	0.415044	C02502	C5H5NO	-H(-)	100	41	94.0304	UBQKCCHYAOITMY-UHFFFAOYSA-N	Organoheterocyclic compounds	314	752	496	585	876	773	696	649	788	715	933	643	661	582	703	664	637	718	770	657	749	825	712	388	884	616	945	475	956	790	876	807	588	786	683	728
42	Methanesulfonic acid	94.9813	1	4750.57	-0.0409226	C11145	CH4SO3	-H(-)	100	42	94.9813	AFVFQIVMOAPDHO-UHFFFAOYSA-N	Organic acids and derivatives	3395	4191	3656	3532	4091	4418	4444	3978	2945	4780	4102	4613	3862	5085	3275	3795	3904	4267	4100	4255	3718	4262	4685	2275	4632	3961	3702	2824	4295	4234	4111	4248	3004	4400	3406	3502
43	Furfural	95.0148	1	3504.73	0.771012	C07090; C14279	C5H4O2	-H(-)	100	43	95.0148	RNYZJZKPGHQTJR-UHFFFAOYSA-N	Organoheterocyclic compounds	163	388	289	425	1002	1027	1215	1115	1043	898	1078	842	1094	1084	919	1149	1012	1083	1057	932	843	971	985	403	1122	1054	1106	676	1017	1128	1033	940	771	910	1019	1047
44	Cyclohexenone	95.0509	1	2844.66	0.710697	C02395; C19249	C6H8O	-H(-)	100	44	95.0509	FWFSEYBSWVRWGL-UHFFFAOYSA-N	Carbonyl compounds	1386	1327	1379	1255	1202	1242	1390	1222	1237	1183	1599	1545	1263	1235	1318	1457	1888	1490	1145	1602	1520	1060	1032	827	1246	1108	1273	1383	1275	1096	1675	1189	1107	1250	1326	1075
45	Maleimide	96.0092	1	2493.59	0.755475	C07272	C4H3NO2	-H(-)	100	45	96.0092	PEEHTFAAVSWFBL-UHFFFAOYSA-N	Organoheterocyclic compounds	68	173	46	135	566	488	597	468	415	470	575	393	495	590	518	479	487	431	472	466	474	463	478	201	612	537	738	460	682	422	522	453	374	507	377	482
46	C5:2	97.0301	1	9519.56	0.878388	C20441; C20578	C5H6O2	-H(-)	100	46	97.0301	XPFVYQJUAUNWIW-UHFFFAOYSA-N	Organoheterocyclic compounds	1472	2230	1832	2931	2724	3320	4214	3465	3427	2436	3168	2900	3454	5125	3792	3071	3532	4320	3364	2463	2645	2471	3035	1130	4303	3823	4830	3025	4595	3586	2979	2726	2659	3491	3162	3379
47	Cyclohexanone	97.0663	1	3533.47	0.72837	C00414; C08497; C16310	C6H10O	-H(-)	100	47	97.0663	JHIVVAPYMSGYDF-UHFFFAOYSA-N	Carbonyl compounds	1725	1782	1927	1831	2262	2854	2319	2666	2264	2422	1872	1881	2077	2621	2085	2241	1787	2287	1812	1297	1936	1647	1365	1012	1824	2115	2061	1525	1800	2628	2048	1997	1207	2138	1953	1683
48	Succinimide	98.0247	1	22817.5	-0.245769	C07273; C11103	C4H5NO2	-H(-)	100	48	98.0247	KZNICNPSHKQLFF-UHFFFAOYSA-N	Organoheterocyclic compounds	14934	16992	15747	16055	19188	19434	18121	18024	18236	16165	18455	15449	16857	19344	19911	18288	17952	17833	19356	15528	18445	16631	18621	8819	18071	17540	18542	14549	19454	18966	17105	19081	12716	17731	17501	15969
49	N-Methyl-2-pyrrolidinone	98.0609	1	1602.17	0.514707	C11118; C18796	C5H9NO	-H(-)	100	49	98.0609	SECXISVLQFMRJM-UHFFFAOYSA-N	Organoheterocyclic compounds	325	427	283	242	787	810	857	847	717	907	864	613	612	770	544	825	732	859	615	528	701	608	699	334	1044	770	754	714	1023	851	955	1113	678	978	750	754
50	Succinic anhydride	99.0089	1	47225.5	0.357587	C19524	C4H4O3	-H(-)	100	50	99.0089	RINCXYDBBGOEEQ-UHFFFAOYSA-N	Organic acids and derivatives	8166	9063	7535	8805	22478	23345	23161	22057	22396	21446	24579	18802	21066	22052	21847	23833	21286	22789	22561	20594	19562	20634	22592	8911	20917	22455	23180	15253	22214	22128	20807	20636	14474	21381	19717	20619
51	Valerolactone	99.0451	1	25657.9	0.519698	C02240; C08279; C12518; C14527; C15499; C19238	C5H8O2	-H(-)	100	51	99.0451	OZJPLYNZGCXSJM-UHFFFAOYSA-N	Organoheterocyclic compounds	12065	15873	11447	16955	15807	22736	14774	16206	16206	16573	21850	12694	13195	21982	19537	17432	15512	20782	17278	14725	13600	12259	13237	5866	15862	16505	19129	11131	12644	19623	18939	13221	10916	24255	13837	15304
52	Gyromitrin	99.0566	1	7554.6	0.85066	C08305; C19285	C4H8N2O	-H(-)	100	52	99.0566	IMAGWKUTFZRWSB-HWKANZROSA-N	Organic nitrogen compounds	815	863	715	1129	4447	4791	3697	3361	3683	3467	3963	2739	3143	3042	3978	4056	3836	4019	3876	3339	3057	2842	3288	1179	3050	2776	2772	1827	3340	2794	2629	2363	2063	3288	2729	2716
53	Cyclohexanol	99.0819	1	4885.19	0.311099	C00854; C02373; C02893; C08492; C19263	C6H12O	-H(-)	100	53	99.0819	HPXRVTGHNJAIIH-UHFFFAOYSA-N	Alcohols and polyols	3658	6517	4839	5082	3524	3567	3742	3880	3689	3274	4447	2606	3469	3829	3897	3551	3398	4698	3678	4211	2913	3247	4747	2505	3575	4663	4416	2856	4009	4830	4252	4352	3251	4759	4251	4020
54	Homoserine lactone	100.04	1	20223.4	0.766629	C01234; C02926; C07509; C08267; C11106; C17234; C19456; C19777	C4H7NO2	-H(-)	100	54	100.04	PAJPWUMXBYXFCZ-UHFFFAOYSA-N	Amino acids, peptides, and analogues	550	659	721	942	4750	4838	4991	4866	5486	3504	4709	2936	4483	4740	4728	5852	4926	4314	4554	4318	4264	4448	4561	1641	5363	4524	5008	3556	5610	4673	5277	4880	3101	4275	4611	4419
55	Pentanamide	100.077	1	1744.96	0.468893	C01842; C03982; C10974; C12455; C17255; C19491; C20312	C5H11NO	-H(-)	100	55	100.077	IPWFJLQDVFKJDU-UHFFFAOYSA-N	Lipids and lipid-like molecules	1018	812	993	810	1554	1212	1544	1608	1735	1180	1004	1023	1372	1380	1406	1836	1258	1309	1549	1198	1064	1184	1324	694	1391	1451	1045	1173	1293	1523	1492	1183	958	1305	1479	967
56	Oxobutanoic acid	101.025	1	61479.9	0.764111	C00109; C00164; C00232; C00349; C06002	C4H6O3	-H(-)	100	56	101.025	TYEYBOSBBBHJIV-UHFFFAOYSA-N	Organic acids and derivatives	1324	3656	1427	3591	15552	14970	15621	14096	14910	13355	16420	12109	13644	12469	13348	15360	15161	15168	15196	12461	13561	13047	14096	5039	14438	13543	14778	10304	14770	15071	14171	13588	9902	12356	13540	15210
57	NDEA	101.072	1	35644.7	0.506784	C14422	C4H10N2O	-H(-)	100	57	101.072	WBNQDOYYEUMPFS-UHFFFAOYSA-N	Organic nitrogen compounds	3851	3981	3545	3960	27018	25204	19845	18126	18818	17415	20022	14867	16900	16764	19419	20783	19539	19568	21571	15328	16729	14987	17301	7042	14968	12769	12478	9727	17331	15097	13695	11802	8570	14013	15179	16047
58	Pyruvate oxime	102.02	1	3529.55	0.7009	C02193; C11822; C20249	C3H5NO3	-H(-)	100	58	102.02	MVGBKLTYYAYYGY-RQOWECAXSA-N	Organic nitrogen compounds	757	605	576	822	1703	2053	1319	1814	1702	1746	1636	1257	1642	1550	1557	1525	1409	1579	1844	1523	1511	1305	1815	792	1556	1280	1437	1224	2531	1780	1618	1874	1131	2014	1607	2013
59	Aminobutanoic acid (ABA)	102.056	1	353047	-0.0961175	C00334; C01026; C01205; C02261; C02356; C02721; C03284; C03665; C05145; C11109; C11735; C19514	C4H9NO2	-H(-)	100	59	102.056	BTCSSZJGUNDROE-UHFFFAOYSA-N	Amino acids, peptides, and analogues	8063	6017	6090	6064	64347	63057	64450	58328	60088	49103	61762	47738	50424	49474	59605	65175	64909	61233	59701	41997	56689	50321	57253	19880	51385	45184	45732	39290	47850	54838	54264	48755	40438	52847	61119	69363
60	Hydroxybutanoic acid	103.04	1	13829.6	0.730094	C00989; C01089; C01188; C01991; C03197; C05984; C06001; C14601	C4H8O3	-H(-)	100	60	103.04	SJZRECIVHVDYJC-UHFFFAOYSA-N	Lipids and lipid-like molecules	11159	8414	8684	19334	6808	6072	5703	5195	6743	8304	4175	6355	4722	5879	7782	6594	5651	6561	6165	5832	5211	4075	6610	6092	12045	5498	6087	4236	4766	6021	9542	7788	3840	6901	7055	6777
61	Serine	104.035	1	84465.6	0.7274	C00065; C00716; C00740	C3H7NO3	-H(-)	100	61	104.035	MTCFGRXMJLQNBG-REOHCLBHSA-N	Amino acids, peptides, and analogues	820	1095	505	565	19573	16886	16494	16746	17305	12238	17945	12425	13834	14833	16095	15695	17434	16033	14541	13236	17036	14608	17267	5266	19144	19934	20614	15188	24192	22421	22613	25652	17206	22876	12038	14001
62	Diethanolamine	104.072	1	1283.44	0.726983	C06772; C11260	C4H11NO2	-H(-)	100	62	104.072	ZBCBWPMODOFKDW-UHFFFAOYSA-N	Organic nitrogen compounds	357	171	301	164	403	380	370	405	365	298	339	352	374	300	335	369	277	343	318	329	355	332	354	205	391	345	299	247	481	369	353	425	332	408	276	362
63	Chloroacrylic acid	104.974	1	461.686	0.582	C06614; C06615; C20609	C3H3ClO2	-H(-)	25	63	104.974	MHMUCYJKZUZMNJ-OWOJBTEDSA-N	Organic acids and derivatives	337	398	173	373	299	323	383	510	553	461	339	483	488	183	482	622	453	430	376	409	335	318	570	332	417	274	260	381	263	302	354	237	326	160	339	308
64	D-Glyceric acid	105.019	1	63867.2	0.571452	C00258	C3H6O4	-H(-)	100	64	105.019	RBNPOMFGQQGHHO-UWTATZPHSA-N	Carbohydrates and carbohydrate conjugates	702	1537	665	1593	11300	11152	35521	39187	22809	17651	16085	21181	28198	9420	14619	44225	38434	29369	14201	25440	16315	24391	25851	8280	17505	10916	11737	7101	9936	8009	8879	9682	4808	9383	13122	19166
65	Nitrosobenzene	106.03	1	1944.61	0.591841	C06876; C07327; C17500	C6H5NO	-H(-)	100	65	106.03	NLRKCXQQSUWLCH-UHFFFAOYSA-N	Benzenoids	624	740	609	710	643	857	1135	1632	972	883	1118	1067	1288	868	889	1207	1289	1174	1087	1013	1167	966	1123	565	1194	1019	979	609	1066	675	733	789	630	791	958	1096
66	Chloropropanoic acid	106.99	1	1549.74	0.71843	C20608	C3H5ClO2	-H(-)	25	66	106.99	GAWAYYRQGQZKCR-REOHCLBHSA-N	Organic acids and derivatives	1007	963	1128	1079	875	1019	919	992	884	799	1159	872	699	1130	830	674	639	838	886	697	1065	1021	756	600	960	677	885	721	752	956	799	954	892	1125	846	1183
67	Benzoquinone	107.014	1	2305.29	0.647762	C00472; C02351	C6H4O2	-H(-)	100	67	107.014	AZQWKYJCGOJGHM-UHFFFAOYSA-N	Carbonyl compounds	503	924	715	1027	1289	1124	1445	1323	1266	1057	1326	1132	993	839	1335	1666	1359	1608	1609	1110	1300	1116	1070	547	1432	1355	1523	1118	1438	1338	1155	1115	1018	985	1178	1221
68	Benzosemiquinone	108.022	1	28152.7	-0.0740058	C02389; C05060	C6H5O2	-H(-)	100	68	108.022	XLHUBROMZOAQMV-UHFFFAOYSA-N	Benzenoids	6378	12301	6497	13876	16480	14730	17182	15869	16472	14897	15943	14706	15037	14966	16393	16584	15790	16597	16365	14314	14530	14683	16357	8452	17727	16132	15764	13776	17667	16414	16162	16183	12504	15118	15943	17377
69	Aminophenol	108.046	1	44866.6	-0.208343	C01987; C02372; C02720; C05058	C6H7NO	-H(-)	100	69	108.046	CDAWCLOXVUBKRW-UHFFFAOYSA-N	Benzenoids	34081	32985	32545	34424	35851	37543	39306	36478	34307	34281	37013	32044	36296	37859	38753	36580	36680	37165	37221	33423	36163	34890	39269	17289	36583	39295	37592	29804	37319	35275	38082	35500	25185	37814	39381	36326
70	Formylphosphonic acid	108.97	1	1016.1	0.789737	C17943	CH3O4P	-H(-)	100	70	108.97	DEBRGDVXKPMWQZ-UHFFFAOYSA-N	Organic acids and derivatives	406	158	535	49	1139	1555	1304	917	987	769	737	984	988	850	944	1192	903	607	1250	714	791	538	825	493	850	445	590	687	1049	838	852	817	894	559	770	574
71	Catechol	109.03	1	39150.2	0.398366	C00090; C00530; C01751; C01785; C11115; C15571	C6H6O2	-H(-)	100	71	109.03	YCIMNLLNPGFGHC-UHFFFAOYSA-N	Benzenoids	11344	13507	11145	14499	22121	17445	19425	18299	17889	16612	19598	16232	16773	18051	18600	18628	17876	19571	19992	15783	17984	16844	18743	9656	19055	19239	17874	14635	19345	18491	17847	16040	13536	17621	17306	18707
72	N-Acetylimidazole	109.041	1	64763.5	0.412723	C02560; C05130	C5H6N2O	-H(-)	100	72	109.041	VIHYIVKEECZGOU-UHFFFAOYSA-N	Organoheterocyclic compounds	4027	4357	4052	4317	25974	24743	19716	19163	20206	17584	20154	15114	16896	16724	20484	20916	20414	20041	22341	16142	18157	16324	18502	6702	15822	13590	13870	10595	18449	15265	15579	14080	9573	14966	15697	16624
73	2,5-Dihydroxypyridine	110.025	1	26733.3	0.0928087	C01059; C02932; C03056; C03927; C05942	C5H5NO2	-H(-)	100	73	110.025	CHGPEDOMXOLANF-UHFFFAOYSA-N	Organoheterocyclic compounds	8331	10035	8236	12287	15982	17210	15320	15757	15973	15197	17988	14345	15524	15128	16060	16414	15075	16238	14882	13991	15430	13885	15656	6501	16813	16160	16523	11988	16486	15110	16138	14286	10660	16107	14242	15110
74	Cytosine	110.037	1	8859.98	0.112889	C00380	C4H5N3O	-H(-)	79	74	110.037	OPTASPLRGRRNAP-UHFFFAOYSA-N	Organoheterocyclic compounds	3517	3777	3513	5057	5470	5919	5619	6268	5617	4928	6132	4861	4815	4731	6057	5872	5081	6486	5606	4086	4538	5079	5456	3054	6999	5926	6206	4287	5338	5059	5581	4905	3955	5418	4897	5223
75	Monomethyl sulfate	110.976	1	11667.1	0.937383	C02704	CH4O4S	-H(-)	100	75	110.976	JZMJDSHXVKJFKW-UHFFFAOYSA-N	Organic acids and derivatives	1890	1994	2070	2693	1142	1637	1410	1390	1423	1366	1516	1205	1517	1320	1369	1263	1389	1446	1634	1056	1394	1488	1373	640	1458	1393	1594	1168	2050	1326	1418	1617	1161	1749	1146	1312
76	Hydroxymethylphosphonate	110.985	1	9272.94	0.945073	C06455	CH5O4P	-H(-)	100	76	110.986	GTTBQSNGUYHPNK-UHFFFAOYSA-N	Organic acids and derivatives	183	408	195	687	1005	1675	1305	1489	1472	1472	1347	1687	1444	1046	950	1257	1066	1561	1090	1021	1095	1128	1085	889	1734	1629	1665	1912	1112	1493	1218	1507	1861	1128	831	1399
77	Furoic acid	111.009	1	116111	0.246873	C01546	C5H4O3	-H(-)	100	77	111.009	SMNDYUVBFMFKNZ-UHFFFAOYSA-N	Organoheterocyclic compounds	9092	36364	8586	45060	35171	38098	38815	34418	30407	32112	37024	24278	29506	32007	30507	48045	30635	35441	39685	28766	32706	30077	33009	13386	37418	28940	30881	20989	32591	30472	32921	24275	19765	30372	27735	27242
78	Uracil	111.02	1	52368.5	0.442536	C00106; C18474	C4H4N2O2	-H(-)	100	78	111.02	ISAKRJDGNUQOIC-UHFFFAOYSA-N	Organoheterocyclic compounds	5711	13616	5199	16327	15724	20111	17606	19318	15740	15695	20455	15172	17016	15394	18059	19988	17500	18959	19405	13916	17965	13674	19891	6683	21655	19368	20794	13950	19040	14712	15850	15403	12683	14974	13692	17976
79	C6:2	111.046	1	29638.1	0.440009	C01066; C04091; C04221; C06105; C08063; C08502	C6H8O2	-H(-)	100	79	111.046	HJSLFCCWAKVHIW-UHFFFAOYSA-N	Carbonyl compounds	15807	15887	16306	17889	16679	17769	16550	17673	14251	15325	16871	13884	17182	16789	17868	17023	16087	16427	17175	15163	17429	13843	16963	8072	17643	16586	19008	12201	16333	16986	16223	16751	10831	16085	15693	17124
80	2-Nitrofuran	112.005	1	5677.13	0.372816	C14414	C4H3NO3	-H(-)	100	80	112.005	FUBFWTUFPGFHOJ-UHFFFAOYSA-N	Organoheterocyclic compounds	2825	2282	2011	2252	2707	2882	2860	2990	2338	2501	2987	2231	2607	2486	2973	2824	2430	3208	3210	3097	3103	2474	3256	1695	2771	2908	2753	1934	3023	2888	3186	2569	1962	3172	2374	2638
81	Pyrroline carboxylic acid	112.04	1	24241.6	-0.0236763	C03564; C03912; C04322; C07275	C5H7NO2	-H(-)	100	81	112.04	RHTAIKJZSXNELN-UHFFFAOYSA-N	Organoheterocyclic compounds	12242	11196	10630	12022	15615	17620	15815	15976	15755	17170	18409	14666	16020	17023	16380	16885	14625	16070	16529	14001	16536	15083	16511	9418	16872	15806	15679	11977	18248	15139	16601	16660	11242	17938	13498	15830
82	Creatinine	112.051	1	6676.77	0.47983	C00791; C19280	C4H7N3O	-H(-)	100	82	112.051	DDRJAANPRJIHGJ-UHFFFAOYSA-N	Amino acids, peptides, and analogues	3757	6461	4964	4816	6143	4825	4266	5370	5043	4680	4639	5031	5563	5332	5657	4400	4120	4576	5570	4219	5677	5843	5394	2689	5803	5835	4464	3393	5596	4249	4166	4644	3254	5932	3572	4790
83	2-Hydroxy-2,4-pentadienoic acid	113.025	1	71327.1	0.677515	C00596; C07091	C5H6O3	-H(-)	100	83	113.025	VHTQQDXPNUTMNB-ONEGZZNKSA-N	Lipids and lipid-like molecules	3364	6266	3117	7059	22666	22791	23211	22675	22460	19535	22229	19000	20459	19200	21093	22067	22057	21593	22779	19110	21174	19712	20930	9274	21579	20935	21076	15750	20977	21147	20008	19627	14182	18465	19906	22641
84	Dihydrouracil	113.036	1	204740	0.460373	C00429; C02512; C02565; C02777; C08311	C4H6N2O2	-H(-)	100	84	113.036	OIVLITBTBDPEFK-UHFFFAOYSA-N	Organoheterocyclic compounds	3415	3670	2863	3676	60314	58112	49219	46825	50552	41621	45662	37970	43775	42904	49654	50977	49582	51320	48988	37318	50201	44548	49802	18358	51187	42115	45562	38576	53153	54605	54286	50784	39042	46882	41267	39183
85	2-Hydroxycyclohexan-1-one	113.061	1	22432.4	0.0177807	C01147; C01880; C03228	C6H10O2	-H(-)	100	85	113.061	ODZTXUXIYGJLMC-UHFFFAOYSA-N	Alcohols and polyols	11789	12783	9918	13869	16448	18218	15823	16063	14965	13950	16677	14099	13602	14460	16811	15623	15573	14957	15445	13411	14495	14323	14138	6835	17411	14788	18625	13995	15113	18940	15332	15672	12758	16549	14504	13637
86	Nitrosopiperidine	113.072	1	10214.2	0.613476	C19284; C19781	C5H10N2O	-H(-)	100	86	113.072	UWSDONTXWQOZFN-UHFFFAOYSA-N	Organoheterocyclic compounds	3439	3005	2598	2963	5368	6509	5360	6015	5135	4905	4767	4217	5239	5072	5046	5137	5217	5098	5289	4971	5483	4630	5067	1979	5732	4238	5105	4085	5229	5971	4966	5784	4630	5005	4527	5184
87	Maleamic acid	114.02	1	99543.8	0.639894	C01596	C4H5NO3	-H(-)	100	87	114.02	FSQQTNAZHBEJLS-UPHRSURJSA-N	Lipids and lipid-like molecules	594	550	650	530	14900	13041	11786	11848	11279	9540	11051	8705	10402	10446	12130	12216	12157	11619	11421	9973	12093	10961	12496	4455	12489	10327	11115	9270	13893	11565	12602	11414	9291	10996	8944	8679
88	Proline	114.056	1	705932	0.248289	C00148; C00763; C16435; C18170	C5H9NO2	-H(-)	100	88	114.056	ONIBWKKTOPOVIA-BYPYZUCNSA-N	Amino acids, peptides, and analogues	14024	18425	12970	15635	167014	189885	115939	113627	105099	108658	119433	97041	96974	98381	100856	98353	109654	111199	146907	86196	105804	88373	95598	35148	83034	81668	83463	57639	92321	121735	101388	102748	78225	109820	59631	58222
89	Fumarate	115.004	1	232815	0.233409	C00122; C01384; C02150	C4H4O4	-H(-)	100	89	115.004	VZCYOOQTPOCHFL-OWOJBTEDSA-N	Organic acids and derivatives	16078	7558	15216	9396	61165	58498	64326	62788	51456	53878	52608	46419	54533	45453	58622	78495	53558	54416	63360	45381	50304	46338	54540	19771	59567	42789	43466	27758	46032	50644	52668	40218	26042	45443	54310	54916
90	Ketovaline	115.04	1	39683.7	0.587446	C00141; C02233; C03273; C06255	C5H8O3	-H(-)	100	90	115.04	QHKABHOOEWYVLI-UHFFFAOYSA-N	Organic acids and derivatives	17241	19872	18118	23066	22515	26248	23889	23689	23166	18812	26468	18872	24087	36906	27499	24005	25241	29782	25378	16758	20548	20406	19977	8484	34937	27371	31229	22172	29731	24349	26360	26264	20975	26152	21664	23800
91	Nitroacrylic acid	115.999	1	3715.87	0.516417	C02231	C3H3NO4	-H(-)	100	91	115.999	MBNRADMGBBUWJK-OWOJBTEDSA-N	Organic acids and derivatives	325	397	460	560	1080	1210	1288	1089	1048	1003	1259	979	1213	1188	1324	1276	1055	1087	1457	1164	1107	1076	1100	567	1920	972	1260	904	1214	1238	1279	1344	890	1184	923	1010
92	Valine; Betaine	116.072	1	685393	0.50588	C00183; C00431; C00719; C01799; C01826; C03571; C06417; C07457; C15987; C16436	C5H11NO2	-H(-)	100	92	116.072	KZSNJWFQEVHDMF-BYPYZUCNSA-N	Amino acids, peptides, and analogues	9906	29107	7546	19683	86941	100318	92446	86198	95775	72861	99195	70943	82548	79867	76583	84329	73876	75116	77110	70227	90568	86388	96507	27555	161161	150211	163386	120643	171894	218311	236614	235556	155312	215576	57466	64165
93	Succinate	117.019	1	82090.6	0.852478	C00042; C02170; C10900	C4H6O4	-H(-)	100	93	117.019	KDYFGRWQOYBRFD-UHFFFAOYSA-N	Organic acids and derivatives	8233	11442	7212	15068	51980	64059	44904	58574	51344	45628	43523	37417	47778	41852	58008	41970	45344	46828	53066	38803	41588	36007	40455	14140	31719	33673	37511	18570	41292	35802	36269	30329	18868	37036	49872	45175
94	Benzofuran	117.035	1	45763.6	0.845616	C14512	C8H6O	-H(-)	100	94	117.034	IANQTJSKSUMEQM-UHFFFAOYSA-N	Organoheterocyclic compounds	320	1440	252	1579	9948	7661	10209	9631	10750	8500	7671	8128	9156	8374	10137	9553	9437	8656	10390	9381	8477	8548	8785	5335	8281	7670	7325	5909	7523	8940	8807	8102	6390	7814	9382	8856
95	Threonine	118.051	1	308424	0.386267	C00188; C00263; C00820; C02115; C03678; C05519; C11108; C12317	C4H9NO3	-H(-)	100	95	118.051	AYFVYJQAPQTCCC-GBXIJSLDSA-N	Amino acids, peptides, and analogues	3474	5333	3174	4136	43831	41366	39295	42410	44547	31476	44876	34755	40116	41034	39442	35461	40319	38349	35779	33124	43027	41176	51386	12485	53493	49967	55379	37679	56078	68181	64014	66440	41460	57979	31058	34367
96	Tetrose	119.035	1	41418	0.571445	C01796; C02022; C02045; C06463	C4H8O4	-H(-)	100	96	119.035	FMAORJIQYMIRHF-HERZVMAMSA-N	Carbohydrates and carbohydrate conjugates	1653	3618	1887	4212	17473	16747	14412	16732	16312	12846	17473	13449	15032	15147	15826	14148	15983	16676	15762	12398	14374	13311	14391	4391	16465	15270	16037	9452	16295	17303	15539	15803	8713	15465	14997	15119
97	Cys	120.012	1	32410.8	0.59065	C00097; C00736; C00793	C3H7NO2S	-H(-)	100	97	120.012	XUJNEKJLAYXESH-REOHCLBHSA-N	Amino acids, peptides, and analogues	385	1305	527	1272	5668	6444	5875	6385	6169	4927	6274	4896	5761	5492	5511	6480	6496	6034	5395	5344	5393	5782	5990	2438	6729	5666	6200	5041	7055	5988	6818	5438	4230	5465	5538	5826
98	Benzamide	120.046	1	19839.2	0.0661122	C09815	C7H7NO	-H(-)	100	98	120.046	KXDAEFPNCMNJSK-UHFFFAOYSA-N	Benzenoids	10116	10424	9831	10586	12542	11781	14187	12656	11697	12130	13118	10445	12711	12587	12814	12774	12497	13188	12895	11834	11808	11451	12121	5728	15382	13649	14226	9900	14691	13647	13701	12266	8943	12706	10837	11280
99	Tromethamine	120.067	1	4514.55	0.697141	C07182	C4H11NO3	-H(-)	100	99	120.067	LENZDBCJOHFCAS-UHFFFAOYSA-N	Organic nitrogen compounds	2129	2401	2534	2558	3047	2361	3720	3200	3219	2447	3195	2622	2566	4235	3714	2779	3442	3843	3207	2725	2852	2769	3302	1578	3798	4053	3686	3008	4479	2790	3270	2884	2349	3027	2956	3654
100	3-Mercaptolactate	120.996	1	147927	0.789619	C05823; C19296	C3H6O3S	-H(-)	100	100	120.996	OLQOVQTWRIJPRE-REOHCLBHSA-N	Carbohydrates and carbohydrate conjugates	21135	26287	17386	31876	60889	59471	62887	56061	55025	48431	66438	43500	57280	49095	54770	61182	60348	52490	60873	46810	51276	51432	52926	17528	67429	56683	59753	38473	68589	64036	64494	54873	40049	56539	54850	55043
101	Benzoate	121.03	1	231030	0.510755	C00180; C00539; C00633; C03067; C06202; C15474	C7H6O2	-H(-)	100	101	121.03	WPYMKLBDIGXBTP-UHFFFAOYSA-N	Benzenoids	37306	28573	37398	29632	158078	150190	150908	137219	144347	146643	174695	124213	135558	109323	142415	150340	139106	144079	165119	134503	127272	121128	122488	64251	160910	141971	150247	119078	125584	153508	151671	125253	102377	118803	135802	136946
102	Phenylethyl alcohol	121.066	1	29816.3	0.0821064	C05853; C06757; C07112; C07213; C07216; C11348; C13637; C14385; C14386; C14582	C8H10O	-H(-)	100	102	121.066	WRMNZCZEMHIOCP-UHFFFAOYSA-N	Benzenoids	14118	9338	12948	10277	13301	14127	12870	13410	11833	12119	14578	11021	12994	13245	12626	12842	13568	14141	12974	12039	12884	12547	11553	6829	14117	13332	14040	10141	12097	12378	13190	13374	9720	13023	12441	13177
103	Nicotinate	122.025	1	31860.8	0.242023	C00253; C06813; C07446; C10164	C6H5NO2	-H(-)	100	103	122.025	PVNIIMVLHYAWGP-UHFFFAOYSA-N	Organoheterocyclic compounds	7588	9657	8116	10644	17567	15782	19634	18709	17900	15107	17774	15848	19121	18535	17582	20935	18555	17261	17822	18224	17753	17395	18425	7535	21349	21597	21494	14130	19124	17365	20274	16860	12468	18006	16762	18132
104	Orcinol	123.045	1	46690	0.487737	C00727; C01502; C02323; C02923; C03351; C06730; C15572; C17467	C7H8O2	-H(-)	100	104	123.045	OIPPWFOQEKKFEE-UHFFFAOYSA-N	Benzenoids	13212	19475	14238	20859	21454	17956	19597	20552	20170	16984	21719	16316	19619	17146	17612	22851	21571	19657	19987	20389	20623	17716	19633	9141	22778	18458	19468	15995	20394	20631	19075	17296	13655	17349	19394	20104
105	Taurine	124.007	1	11751.2	0.243352	C00245	C2H7NO3S	-H(-)	100	105	124.007	XOAAWQZATWQOTB-UHFFFAOYSA-N	Organic acids and derivatives	5254	7759	5278	5943	10066	9282	9024	9632	8843	8167	9978	7610	6215	8733	11000	8814	9610	9474	8877	8060	11852	8766	10326	4541	10268	9505	8750	7513	9379	8225	9581	7698	6750	8805	7150	8321
106	2-Aminoethylphosphonate	124.017	1	10507.2	0.732061	C03557; C03782	C2H8NO3P	-H(-)	100	106	124.016	QQVDJLLNRSOCEL-UHFFFAOYSA-N	Organic acids and derivatives	2019	2856	1960	3112	5970	5247	5497	5605	5119	4958	5472	4987	4525	5235	5160	5063	5559	6123	5502	5208	5821	5282	5862	2534	5733	5348	5586	4762	6540	5378	5724	5050	3998	4568	5041	5366
107	N-Ethylmaleimide	124.041	1	24889.4	-0.0225168	C02441; C02854; C14602; C14604; C16671; C18351	C6H7NO2	-H(-)	100	107	124.041	HDFGOPSGAURCEO-UHFFFAOYSA-N	Organoheterocyclic compounds	11954	13157	12790	13643	14202	14673	15686	15974	14217	14596	16520	12841	15146	14814	15653	14722	13906	16073	14908	12766	14483	14160	14806	8034	14792	15264	15213	12085	15935	15306	16192	13972	10321	15111	14969	14621
108	2-Hydroxyethylphosphonate	125.001	1	5308.4	0.849515	C06451	C2H7O4P	-H(-)	100	108	125.001	SEHJHHHUIGULEI-UHFFFAOYSA-N	Organic acids and derivatives	2003	2583	2142	2793	3255	4121	3916	3740	3659	3541	3921	3752	3301	3249	3530	3484	3312	4360	3577	3259	3767	3256	3785	2231	4131	3806	3737	2918	3492	3911	3207	3577	3310	3530	3151	3330
109	Pyrogallic acid	125.025	1	39464	0.306523	C01108; C02183; C02752; C02814; C11101; C11918; C20718	C6H6O3	-H(-)	100	109	125.025	WQGWDDDVZFFDIG-UHFFFAOYSA-N	Benzenoids	8705	9599	8671	10246	18460	18903	18727	19392	17589	18426	18353	16646	17602	17879	18320	18646	18337	18910	20897	18123	17744	18080	18410	9894	18802	18547	18428	13110	18862	17932	17588	15251	12165	16965	16669	18695
110	Thymine	125.036	1	22085	0.488845	C00178; C02835	C5H6N2O2	-H(-)	100	110	125.036	RWQNBRDOKXIBIV-UHFFFAOYSA-N	Organoheterocyclic compounds	5264	4961	4821	5879	10384	9968	9714	10211	9683	8501	10026	7887	8837	9030	9737	9815	9463	10509	10354	9039	9357	8468	9556	4241	9113	8555	8928	6546	10542	8611	8344	8396	6015	8965	8207	9100
111	Toluene-cis-dihydrodiol	125.061	1	25944.6	0.139709	C04592; C12101	C7H10O2	-H(-)	100	111	125.061	FTZZKLFGNQOODA-NKWVEPMBSA-N	Alcohols and polyols	14224	10655	14088	10608	12722	12649	12784	12732	11727	10821	13942	10655	12599	12996	13947	10800	11837	12425	12619	10800	13295	10829	14020	6832	13215	12440	12278	9997	12145	15791	12101	11988	8981	12009	10978	12006
112	Sulcatone	125.098	1	43273	-0.23131	C07287	C8H14O	-H(-)	100	112	125.098	UHEPJGULSIKKTP-UHFFFAOYSA-N	Carbonyl compounds	42596	46510	39752	46084	33893	35681	33989	35330	34368	32163	35873	32317	34814	35442	38149	31754	33519	34368	31744	33920	34327	31052	37771	21718	33654	34499	38840	32739	40158	39770	34844	37910	25799	36005	29446	36845
113	2,3,6-Trihydroxypyridine	126.02	1	13131.7	0.342031	C03458; C19721	C5H5NO3	-H(-)	100	113	126.02	YXJHZIOEJRCYHK-UHFFFAOYSA-N	Organoheterocyclic compounds	3018	3630	3615	4043	6880	6336	6928	6767	6383	5552	6681	5699	6630	7073	6704	6848	6553	6492	6561	6064	6423	5873	6723	2534	6679	6791	6608	4509	8049	6447	6753	5363	3986	6485	5546	5980
114	5-Amino-4-imidazole carboxylate	126.03	1	5904.8	0.649665	C05516; C16621	C4H5N3O2	-H(-)	100	114	126.03	PWCLNQLPYQVWAB-UHFFFAOYSA-N	Organoheterocyclic compounds	1872	2072	2180	1833	3269	3176	3460	3247	2743	2580	3365	2431	2986	3144	3542	3018	3551	3374	3335	3020	2705	2986	3512	1966	3185	3124	3417	2431	3308	3207	3425	2890	2025	2679	3245	2915
115	(S)-2,3,4,5-Tetrahydropyridine-2-carboxylate	126.056	1	20585.5	-0.0667797	C00450; C04092; C08268; C08292; C10149; C13694	C6H9NO2	-H(-)	100	115	126.056	CSDPVAKVEWETFG-YFKPBYRVSA-N	Amino acids, peptides, and analogues	10586	11137	10091	10416	16148	14851	14683	14571	14441	13591	15841	14025	14704	16194	15868	14725	15026	15876	14833	13048	15118	13379	14751	6823	17903	15736	16460	13205	15810	16641	17668	15486	10990	16146	13569	16516
116	N-Cyclohexylformamide	126.093	1	7001.09	-0.446366	C11519	C7H13NO	-H(-)	100	116	126.093	SWGXDLRCJNEEGZ-UHFFFAOYSA-N	Organic acids and derivatives	5916	6429	7682	6838	5956	5815	5515	6523	6710	5502	5928	5612	6099	5359	5768	5425	5930	5742	5895	5211	5551	5420	6383	2477	5340	6275	6646	4410	6817	6828	6114	6325	4463	5810	5338	5648
117	Thiouracil	126.996	1	4743.7	0.723233	C19304	C4H4N2OS	-H(-)	39	117	126.996	ZEMGGZBWXRYJHK-UHFFFAOYSA-N	Organoheterocyclic compounds	1276	1396	1473	1254	2716	2857	2520	2406	2579	2302	2954	2135	2301	2358	2560	2757	2562	2900	2715	1695	2227	1902	2842	1448	2489	2586	2475	2154	2570	2521	2333	2287	1617	2097	2115	2307
118	Barbiturate	127.016	1	7037.96	0.600658	C00813	C4H4N2O3	-H(-)	72	118	127.016	HNYOPLTXPVRDBG-UHFFFAOYSA-N	Organoheterocyclic compounds	2044	1699	2286	2143	4157	4367	3994	4215	4169	3740	4176	3516	3825	4146	4175	3893	3954	4085	3644	3531	4156	3422	4251	1909	3883	4248	3920	2876	3970	3631	3724	3316	2535	3806	3540	3685
119	Dihydrothymine	127.051	1	452701	0.690141	C00906; C05715; C05717	C5H8N2O2	-H(-)	100	119	127.051	NBAKTGXDIBVZOO-UHFFFAOYSA-N	Organoheterocyclic compounds	875	1115	756	1518	82562	80925	57664	55549	55592	48721	56209	40406	50119	46113	57793	61848	61527	59557	63958	44853	50100	40876	49092	17212	42601	33397	33081	25940	50221	40658	36766	31612	24600	38709	41312	46017
120	Ethyl tiglate	127.077	1	57908.7	-0.129446	C08487; C09822; C10921; C10976; C11950; C13714; C13717	C7H12O2	-H(-)	100	120	127.077	OAPHLAAOJMTMLY-GQCTYLIASA-N	Lipids and lipid-like molecules	15696	16671	15145	17953	40666	41453	30206	26893	28565	29405	32098	24969	25327	26669	32085	32190	27515	30228	33706	24804	21845	18852	26274	12433	23334	25932	22869	17492	26431	27840	27887	24013	18298	27681	25306	25521
121	Oxoproline	128.036	1	1.33994e+06	0.564861	C01877; C01879; C02237; C04281; C04282	C5H7NO3	-H(-)	100	121	128.036	HFXAFXVXPMUQCQ-BYPYZUCNSA-N	Amino acids, peptides, and analogues	89241	208509	75354	127132	946530	1111063	695771	759626	798810	697233	900086	583966	730443	674148	616343	765042	668475	747019	682954	512701	712201	557685	764207	204819	608527	512964	573070	439609	901666	574633	536497	566972	404009	612082	685517	582509
122	N-Methylhexanamide	128.108	1	4667.15	0.922574	C02722	C7H15NO	-H(-)	100	122	128.108	RSPBQSYWXAROOO-UHFFFAOYSA-N	Lipids and lipid-like molecules	209	364	231	349	1876	1730	2235	1710	1773	1602	2121	1385	1737	2057	1736	2027	2009	2006	1742	1390	1878	2018	1957	427	2305	2362	2176	1315	2500	1721	2093	1541	1246	1830	1672	1912
123	Itaconate	129.019	1	73835.7	0.598663	C00433; C00490; C01732; C02132; C02214; C02226; C02800	C5H6O4	-H(-)	100	123	129.019	VHKNBDIQDAXGBL-UHFFFAOYSA-N	Organic acids and derivatives	1895	3482	1603	4184	22501	30802	23031	22550	24203	24747	31753	18419	20618	22523	16668	24545	19818	24534	19279	13437	19234	19674	21850	6752	21460	18349	20803	14742	21495	21418	21514	24536	17537	23245	19921	17357
124	4-Methyl-2-oxopentanoate	129.056	1	66185.6	0.802777	C00233; C00671; C00902; C01012; C02122; C02129; C03241; C03465; C03467; C03500; C06008; C06102; C12314; C14530	C6H10O3	-H(-)	100	124	129.056	BKAJNAXTPSGJCU-UHFFFAOYSA-N	Organic acids and derivatives	43016	47158	40040	49548	44754	48543	44420	42863	40997	39388	47512	32994	39198	44288	43430	38079	40018	43238	43720	38506	43335	36360	40057	17354	49584	46664	51528	35992	47490	59800	52115	57516	40915	56334	37529	37807
125	Cucurbitine	129.068	1	14457.6	0.785484	C10140; C19780; C19783	C5H10N2O2	-H(-)	100	125	129.068	DWAKXSZUASEUHH-RXMQYKEDSA-N	Amino acids, peptides, and analogues	7126	8489	6535	8842	10022	11855	10005	9397	8513	8398	10981	7659	9212	10910	9323	9061	9829	10371	10803	8058	9192	8481	8392	3557	10435	10002	10305	6772	10765	11077	10769	9899	8664	10487	8370	7856
126	N-Acetylputrescine	129.103	1	15403.5	0.109527	C02714; C19279	C6H14N2O	-H(-)	100	126	129.103	KLZGKIDSEJWEDW-UHFFFAOYSA-N	Organic acids and derivatives	13853	11679	14880	11419	13200	13739	13342	13249	11480	10818	12583	10094	12963	12029	13129	13837	13491	13731	11956	12362	13581	12835	12864	6735	13475	13810	14332	10158	12797	14058	12613	14150	10414	14246	11716	12172
127	2-Oxosuccinamate	130.015	1	8170.07	0.80779	C02362; C05840; C13058	C4H5NO4	-H(-)	100	127	130.015	ONGPAWNLFDCRJE-UHFFFAOYSA-N	Organic acids and derivatives	1168	1587	695	1401	2251	2981	2222	2264	2325	2083	2794	1941	2360	2144	2561	2878	2332	2326	2090	1890	2685	2383	2450	1228	3118	2549	2922	1719	3206	2963	3183	2894	2567	2977	1792	2232
128	5-Aminolevulinic acid	130.051	1	461818	0.157854	C00430; C01015; C01073; C01110; C01157; C01165; C03341; C03440; C03651; C03741; C05147; C19706	C5H9NO3	-H(-)	100	128	130.051	ZGXJTSGNIOSYLO-UHFFFAOYSA-N	Amino acids, peptides, and analogues	14601	22064	13323	18191	42552	43863	42084	40480	42728	35858	43681	33895	37635	40548	41356	40523	40162	40896	40262	32810	40657	40346	42475	15738	46310	40789	43302	29228	47539	46883	47425	43359	31440	47911	35637	36568
129	(Iso)Leucine	130.088	1	1.48944e+06	0.636218	C00123; C00407; C01570; C01933; C02378; C02486; C06418; C08263; C16434; C16439; C16647	C6H13NO2	-H(-)	100	129	130.088	ROHFNLRQFUQHCH-YFKPBYRVSA-N	Amino acids, peptides, and analogues	38257	152488	30850	93623	228137	279419	300581	270051	316699	232668	283449	219513	267126	257468	219778	262642	203316	198227	219827	224049	274002	267960	301239	75832	662239	649630	699868	434876	711194	929662	982693	932656	592925	896520	156629	176285
130	N-Carbamoylputrescine	130.099	1	455118	0.963746	C00436; C17146	C5H13N3O	-H(-)	100	130	130.099	YANFYYGANIYHGI-UHFFFAOYSA-N	Organic acids and derivatives	6826	26608	7170	16654	34113	41986	43239	40706	47593	34795	43550	33370	40864	40459	34501	39620	30312	30041	33189	35910	42149	41895	45582	12294	91912	88473	94944	63147	97680	117779	124741	118502	80380	112123	24693	28409
131	Asparagine	131.046	1	426436	0.864194	C00152; C01043; C01905; C02037; C02642; C16438; C19258; C19301	C4H8N2O3	-H(-)	100	131	131.046	DCXYFEDJOCDNAF-REOHCLBHSA-N	Amino acids, peptides, and analogues	460	754	432	655	37949	36599	32150	31290	32644	25061	28324	22032	28709	28431	31248	32124	31949	31805	30933	25291	33316	27831	32805	10856	33416	25619	28568	24955	38176	36945	33143	32516	25032	30239	24943	24235
132	Ornithine	131.082	1	1.1069e+06	0.462096	C00077; C00515; C01602; C03943; C11320	C5H12N2O2	-H(-)	100	132	131.082	AHLPHDHHMVZTML-BYPYZUCNSA-N	Amino acids, peptides, and analogues	29118	9456	22702	7765	78196	79974	78463	71039	78913	66711	94071	58529	71241	66268	75246	68101	68110	63484	72304	66881	89217	58709	78001	27497	100901	85847	107032	107092	109851	102084	95378	120210	100844	99143	60092	59638
133	Aspartate	132.03	1	517053	0.804544	C00049; C00402; C16433; C19911	C4H7NO4	-H(-)	100	133	132.03	CKLJMWTZIZZHCS-REOHCLBHSA-N	Amino acids, peptides, and analogues	831	954	591	682	27099	35821	34318	26273	24927	25169	29962	22467	22175	21822	22726	28649	27699	25257	30482	19908	22683	23067	25238	8881	23925	18789	19615	17131	25352	20939	19174	14804	11338	14235	13925	16867
134	Malate	133.014	1	730085	0.0632406	C00149; C00497; C00711; C03064	C4H6O5	-H(-)	100	134	133.014	BJEPYKJPYRNKOW-REOHCLBHSA-N	Organic acids and derivatives	48259	28989	48465	36220	169383	166520	194869	185686	155870	153352	148040	121267	167484	125236	169771	233271	157196	154328	176186	125536	141001	121314	154911	51908	178015	108464	112488	75387	131371	154957	150214	109432	68719	124855	160987	159300
135	S,S-Dimethyl-beta-propiothetin	133.034	1	122428	0.303918	C04022	C5H10O2S	-H(-)	100	135	133.034	DFPOZTRSOAQFIK-UHFFFAOYSA-N	Organic acids and derivatives	4580	4824	4360	6000	28727	24438	28367	27102	26906	24850	24535	21945	27033	22078	25712	31108	26465	24605	25813	23327	23820	21666	25384	11982	27716	22855	23787	18266	25257	25627	23682	19258	16257	21792	25823	27425
136	1,2,6-Hexanetriol	133.087	1	15720.7	0.637525	C20334	C6H14O3	-H(-)	100	136	133.087	ZWVMLYRJXORSEP-UHFFFAOYSA-N	Lipids and lipid-like molecules	3128	2915	2900	3389	5574	6022	5255	5637	5396	4811	5415	4510	5369	6115	6261	5697	4902	5396	5366	3827	5447	5465	4800	2008	5655	5473	5561	3625	5530	5523	5367	5615	3906	6526	4848	5436
137	Proxan	134.994	1	6387.39	0.762102	C19127	C4H8OS2	-H(-)	100	137	134.994	UOJYYXATTMQQNA-UHFFFAOYSA-N	Organosulfur compounds	5103	7929	5142	7109	5133	5958	6548	6384	5736	4246	5231	4823	5431	4955	6185	6239	5901	6587	7156	4672	5175	5089	5738	2851	6709	6206	6208	3787	6246	5211	6197	5452	3810	4621	5957	5914
138	Threonate	135.03	1	156432	0.741252	C01620	C4H8O5	-H(-)	100	138	135.03	JPIJQSOTBSSVTP-STHAYSLISA-N	Carbohydrates and carbohydrate conjugates	3385	1254	3459	1307	39111	37564	42563	39631	41670	34297	34696	29261	33425	35540	36447	37011	38351	36876	46600	31270	34012	35090	35989	14184	35543	31468	35489	21754	36760	53079	38705	37893	23555	38524	39481	40288
139	Phenyl acetate	135.045	1	356502	0.71484	C00548; C01454; C03765; C05613; C06224; C07085; C07086; C07189; C07211; C07215; C10700; C10761; C14087; C15583; C20645	C8H8O2	-H(-)	100	139	135.045	IPBVNPXQWQGGJP-UHFFFAOYSA-N	Benzenoids	63999	88646	70345	96241	146245	158866	172883	172262	158481	127762	147250	139279	163187	167356	169032	180056	177364	182978	165465	139129	143581	137686	149868	64168	186814	166851	169806	117164	164174	155982	147839	136076	106831	141726	149491	172381
140	Sodium salicylate	136.016	1	29196.9	0.262971	C07587	C7H5O3.	-H(-)	100	140	136.016	ABBQHOQBGMUPJH-UHFFFAOYSA-M	Benzenoids	2387	12470	2302	11650	14944	15681	16339	14997	12952	12910	16958	12151	12976	13478	19186	14675	15718	15886	16745	17773	13293	14757	19326	6881	17243	15948	17498	13871	23103	17287	17928	16477	11955	16268	12730	15313
141	Anthranilate	136.041	1	40831.9	0.0963204	C00108; C00568; C01004; C14394; C19486; C19597	C7H7NO2	-H(-)	100	141	136.041	RWZYAGGXGHYGMB-UHFFFAOYSA-N	Benzenoids	8888	6814	8288	7212	15538	15305	16425	16158	15475	13910	15840	13928	15511	15991	15462	16612	15377	16158	16055	13595	13571	13688	14864	6964	16118	15809	16570	12593	17295	16078	15704	14518	11083	15075	14981	15196
142	Tyramine	136.077	1	26061.7	0.205649	C00483; C01183; C02735; C03473; C16570; C18396; C19216; C19376	C8H11NO	-H(-)	100	142	136.077	DZGWFCGJZKJUFP-UHFFFAOYSA-N	Benzenoids	13421	3548	12296	3459	10795	11415	13217	11495	12788	12400	12474	10429	10957	12100	11538	12016	11761	12830	11174	9963	11588	10767	11757	6051	12429	12912	12212	10169	12192	12547	13498	13632	9694	13884	11316	11763
143	4-Hydroxybenzoate	137.024	1	154961	0.751943	C00156; C00587; C00805; C05585; C10832; C16700; C18316	C7H6O3	-H(-)	100	143	137.024	FJKROLUGYXJWQN-UHFFFAOYSA-N	Benzenoids	17684	52598	16438	40715	86146	69119	76891	79110	82488	72426	80732	68350	73967	60046	66450	88239	77462	80497	73354	67959	67886	67272	74638	37366	77259	70035	71130	62614	73606	80987	69516	71867	52704	62643	74573	86047
144	Urocanate	137.036	1	321901	0.640672	C00785; C02126; C19345	C6H6N2O2	-H(-)	100	144	137.036	LOIYMIARKYCTBW-OWOJBTEDSA-N	Organoheterocyclic compounds	166477	698985	114077	159743	95815	99600	88759	97658	92995	79494	97570	98792	89930	90697	109989	105741	90548	99671	85170	201873	99297	80512	109164	41049	100859	103978	105826	72333	121875	102186	90542	105931	63896	89545	93544	98439
145	3-Methoxybenzyl alcohol	137.06	1	43572.9	0.497589	C03352; C06044; C06728; C07084; C11480; C13638; C20694	C8H10O2	-H(-)	100	145	137.06	IIGNZLVHOZEOPV-UHFFFAOYSA-N	Benzenoids	22736	35089	20370	18319	19445	17732	18207	20081	17296	18505	19633	15951	18774	19192	19225	18717	18659	21461	19650	22306	19512	16432	19872	8919	19779	19934	20328	15943	20341	21039	19816	19006	14021	18934	17491	18602
146	Isophorone	137.097	1	18214.3	0.798189	C14743; C16323	C9H14O	-H(-)	100	146	137.097	HJOVHMDZYOCNQW-UHFFFAOYSA-N	Carbonyl compounds	6587	4111	6527	4949	8691	8135	10216	9238	8514	10083	9920	7813	9957	8173	8550	9376	8022	8818	8683	11238	9137	9821	7547	5313	10244	9523	10566	7925	9748	9570	7576	7916	7265	8641	8415	8647
147	Methylarsonate	138.937	1	239254	0.31541	C07294	CH5AsO3	-H(-)	25	147	138.937	QYPPRTNMGCREIM-UHFFFAOYSA-N	Organometallic compounds	59236	57750	56996	91899	110700	137417	144342	123375	109141	123337	117103	111000	111562	118366	103952	150800	97913	125920	118416	126510	108700	121915	123027	109372	154307	123952	120633	115846	137903	116534	122048	113179	112194	116798	106277	116096
148	cis-4-Carboxymethylenebut-2-en-4-olide	139.003	1	41153.8	0.732437	C04431; C12838; C20449	C6H4O4	-H(-)	100	148	139.003	AYFXPGXAZMFWNH-ONEGZZNKSA-N	Organoheterocyclic compounds	37830	40689	40466	42756	34065	34602	35925	28879	33460	32237	33984	29809	25381	34093	34240	35439	34451	36656	36910	25949	31070	30585	36487	16945	30353	34154	35978	26638	29871	35171	31309	34414	22268	32999	34245	36735
149	Uracil 5-carbaldehyde	139.015	1	51664	0.67134	C17206	C5H4N2O3	-H(-)	100	149	139.015	OHAMXGZMZZWRCA-UHFFFAOYSA-N	Organoheterocyclic compounds	58395	68107	61874	86481	48173	51124	48334	48865	47441	48067	49866	45407	49914	49094	48795	51870	47347	52155	50491	53240	49118	46107	51058	25626	50195	51372	50169	40226	53242	48833	46634	49916	33449	49224	49326	51626
150	2,3,5-Trihydroxytoluene	139.04	1	48520.5	0.542663	C03338; C10792; C14110; C16401; C18317; C20362	C7H8O3	-H(-)	100	150	139.041	GIGNQZIJYUEWTI-UHFFFAOYSA-N	Benzenoids	29117	31876	29259	31560	39559	37188	38200	39209	35633	36469	42281	34192	37263	36513	38122	38813	38200	37262	38025	35456	38402	37119	38424	18958	39576	40178	39341	27102	42974	36730	39398	34119	25144	36364	33261	37279
151	Methylimidazoleacetic acid	139.051	1	22061.2	0.217639	C05828; C13693; C20522	C6H8N2O2	-H(-)	100	151	139.051	ZHCKPJGJQOPTLB-UHFFFAOYSA-N	Organoheterocyclic compounds	8430	12866	8602	12738	16873	15545	20851	21629	20360	15862	33805	14918	18845	16907	19639	18338	24734	16683	16350	21636	14406	24366	22479	6886	22954	19979	19282	14532	18644	16320	17115	15839	9581	16999	20605	14886
152	cis-1,2-Dihydro-3-ethylcatechol	139.076	1	25395.7	0.131231	C06727; C16656; C18011; C19311	C8H12O2	-H(-)	100	152	139.076	BACDCBUEYBFLFV-JGVFFNPUSA-N	Alcohols and polyols	11403	13824	13277	13291	14157	14534	15095	15212	14246	12598	14989	11781	13953	14542	13039	13067	13315	12079	13164	12929	13940	12967	13144	6171	15224	12562	13631	11754	13262	16058	12670	13245	9836	14041	12860	13341
153	Methamidophos	139.994	1	8249.05	0.419561	C18667	C2H8NO2PS	-H(-)	100	153	139.994	NNKVPIKMPCQWCG-UHFFFAOYSA-N	Organophosphorus compounds	4572	6643	4693	6542	4546	4910	9166	7122	4791	5021	8391	4170	5723	7211	5335	7800	4779	8714	10331	7744	5967	4615	5959	3929	6084	5698	5869	3978	7152	8866	5720	5187	6663	5949	4151	5591
154	2-Aminomuconate semialdehyde	140.036	1	32166.6	0.165179	C03824; C04226; C09960	C6H7NO3	-H(-)	100	154	140.036	QCGTZPZKJPTAEP-REDYYMJGSA-N	Amino acids, peptides, and analogues	16124	22526	15220	25116	25384	27258	25621	27159	26609	24098	27450	24381	24714	28961	28001	25667	26038	26411	26161	25395	26984	25225	27502	13396	26064	26409	27873	20905	28580	25562	27746	25863	18463	24989	25946	25174
155	Ethosuximide	140.072	1	10386.4	0.298678	C07505; C08287; C10128; C16821	C7H11NO2	-H(-)	100	155	140.072	HAPOVYFOVVWLRS-UHFFFAOYSA-N	Organoheterocyclic compounds	3572	3865	3825	3817	6291	5929	6776	5879	5839	5671	5684	5908	6128	5278	6386	5862	5159	5740	6326	6499	5928	5875	7071	3222	6767	6676	7114	5242	8175	6805	6982	5252	4622	5633	5642	6197
156	Histidinol	140.083	1	4381.57	0.316242	C00860	C6H11N3O	-H(-)	100	156	140.083	ZQISRDCJNBUVMM-YFKPBYRVSA-N	Organic nitrogen compounds	1033	1575	1123	1758	2110	2397	2387	2866	2263	2340	3186	2391	2901	2051	2888	2273	2600	2273	2450	3170	2132	2491	2467	1781	2324	2163	2484	2637	2645	2657	2164	2442	2205	2144	2273	2124
157	Thien-2-ylacetate	141.003	1	13479.7	0.689196	C02595	C6H6O2S	-H(-)	93	157	141.003	SMJRBWINMFUUDS-UHFFFAOYSA-N	Organoheterocyclic compounds	12266	16092	12069	18004	12987	12071	12647	12313	12349	12236	12963	11114	13472	13664	12314	12436	11979	12885	12448	12075	12442	11851	12975	7024	12410	11922	13122	10156	12311	13809	12186	11711	9494	13361	12217	12361
158	4-Oxocyclohexanecarboxylate	141.056	1	19527.7	0.446037	C03767	C7H10O3	-H(-)	100	158	141.056	OWLXUYGCLDGHJJ-UHFFFAOYSA-N	Carbonyl compounds	7498	10252	7595	11447	10026	11771	11589	10686	10378	11145	11413	9666	12760	10465	10828	11534	11138	9854	11151	12905	10453	11477	11508	5861	11429	9910	10412	8664	9809	9755	10734	10881	8863	10517	10696	9741
159	Ectoine	141.068	1	12290	0.564829	C06231	C6H10N2O2	-H(-)	100	159	141.068	WQXNXVUDBPYKBA-YFKPBYRVSA-N	Amino acids, peptides, and analogues	1606	3128	1841	3700	5785	6977	6742	7233	6621	5492	8731	5493	7666	7434	6900	6363	8445	6335	6241	5914	5374	7166	7941	1896	7815	6803	7679	5231	7775	7186	6926	8470	4734	7133	6242	6273
160	Cycloheptanecarboxylic acid	141.092	1	31122.4	-0.152891	C12104; C12297; C16648; C16653; C16654; C19318; C19757	C8H14O2	-H(-)	100	160	141.092	VZFUCHSFHOYXIS-UHFFFAOYSA-N	Organic acids and derivatives	22768	27028	23544	26143	22400	21901	21757	23170	22142	21215	24621	19094	23347	21522	23875	21886	22340	23487	21716	23351	20754	19813	22118	11818	24045	24157	25911	18560	25421	26580	22550	22938	18096	25203	23867	22177
161	2-Amino-5-chlorophenol	142.006	1	2644.13	0.707584	C20669	C6H6ClNO	-H(-)	25	161	142.006	FZCQMIRJCGWWCL-UHFFFAOYSA-N	Benzenoids	610	506	507	766	1686	1728	1507	1415	1875	1902	1586	1414	1252	1595	1571	1677	1884	1720	1692	1542	1385	1261	1837	784	1643	1964	1956	1479	1765	1555	1811	1203	1089	1538	1523	1386
162	2-Hydroxymethylclavam	142.051	1	24594.1	0.297967	C17357	C6H9NO3	-H(-)	100	162	142.051	CRVXTEJTLQIKDI-XINAWCOVSA-N	Organoheterocyclic compounds	2512	4586	2196	4700	11237	12173	11820	11974	12872	10029	11208	8029	11127	10346	11695	13851	11694	12005	11320	11064	11422	10941	11826	3865	15040	10463	12636	9995	13942	14351	15739	15793	10015	13795	12031	10770
163	(-)-Hygroline	142.124	1	1750.23	0.781421	C10152; C10168; C19983	C8H17NO	-H(-)	100	163	142.124	CWMYODFAUAJKIV-HTQZYQBOSA-N	Organoheterocyclic compounds	953	1320	586	874	1004	1435	1282	1301	1126	897	1434	1109	822	1404	1321	1423	1203	1005	1376	1666	1016	1315	1337	841	1220	1291	1002	1187	1413	1251	1344	1372	1189	1320	1052	1228
164	2,3-Dimethylmaleate	143.035	1	30490.6	0.539907	C00922; C01757; C02295; C02930; C19821; C19822; C19826	C6H8O4	-H(-)	100	164	143.035	CGBYBGVMDAPUIH-ARJAWSKDSA-N	Lipids and lipid-like molecules	3353	5162	2952	5722	12767	13742	12921	13749	13131	11232	13461	10892	12466	11780	12096	11623	12468	13775	12511	11361	11453	11377	12507	4916	12183	12089	12342	8848	12595	12789	11256	11279	7954	11451	11731	12891
165	2-Naphthol	143.05	1	23936.9	0.860046	C11713; C11714; C14786; C14787	C10H8O	-H(-)	100	165	143.05	JWAZRIHNYRIHIV-UHFFFAOYSA-N	Benzenoids	3205	4994	3322	6102	9496	10398	10226	9991	9596	8284	9293	8966	9692	9707	9527	9543	10036	9660	9166	9079	9010	9163	9142	4557	9928	9060	8969	7688	11811	9419	9157	8736	7894	9694	8312	9534
166	trans-4-Hydroxycyclohexanecarboxylate	143.07	1	46014.3	0.490677	C04404; C16590	C7H12O3	-H(-)	100	166	143.07	HCFRWBBJISAZNK-IZLXSQMJSA-N	Alcohols and polyols	25889	29971	26968	31696	32625	32734	34643	36941	30232	29956	34930	29303	30612	31513	35089	32323	33179	36583	36980	44254	33103	32883	31726	16739	37770	35234	33620	28622	34692	45607	35604	32743	25937	30784	26022	31357
167	Octanoic acid	143.108	1	216354	-0.464577	C06423; C07185	C8H16O2	-H(-)	100	167	143.108	WWZKQHOCKIZLMA-UHFFFAOYSA-N	Lipids and lipid-like molecules	209641	241040	203780	237441	227816	222054	189643	188998	198089	198940	193784	162974	188720	203297	200329	179611	180598	187955	206912	201279	169687	165537	191753	99168	191951	183910	188931	136910	179716	218209	195087	188876	139539	221292	183429	178962
168	2-Oxoglutaramate	144.031	1	15795.9	0.841959	C00940; C05572	C5H7NO4	-H(-)	100	168	144.031	COJBGNAUUSNXHX-UHFFFAOYSA-N	Organic acids and derivatives	1121	1286	890	1216	8450	6850	7197	6973	6491	6204	6783	5795	6352	6944	9230	7900	7494	7206	6770	8506	8001	6311	9639	2917	7174	7464	7090	6091	9775	7723	8192	6502	5150	7890	5865	7340
169	3-Methyleneoxindole	144.045	1	144775	0.0706885	C02796; C06324; C06338; C06343; C06415; C08493; C19434	C9H7NO	-H(-)	100	169	144.045	IGXUUWYVUGBMFT-UHFFFAOYSA-N	Organoheterocyclic compounds	14293	41533	13864	46129	102404	81025	96678	110440	80845	69704	91631	82514	83883	81424	90551	98605	91193	87079	83873	106664	92828	92094	104174	63989	117490	108508	105200	100345	104120	106603	105976	76091	76839	82306	70469	109511
170	ZAPA	145.009	1	18278.1	0.730812	C13695	C4H6N2O2S	-H(-)	100	170	145.009	QEYNZJBVNYDZKZ-UPHRSURJSA-N	Lipids and lipid-like molecules	278	385	292	416	3030	2909	3205	3139	3324	2517	2655	2299	3132	2725	2863	3098	3127	3025	3126	2817	3268	2587	2940	1197	3145	2360	2664	2031	2974	2685	2394	2227	1977	2396	2597	2645
171	Oxoglutarate	145.014	1	54755.9	0.851409	C00026; C03716; C05406; C06030; C06316	C5H6O5	-H(-)	100	171	145.014	KPGXRSRHYNQIFN-UHFFFAOYSA-N	Organic acids and derivatives	727	843	764	889	6061	5775	6321	6290	6139	5284	5475	5203	5852	5585	5823	6147	6129	6445	6391	5405	5501	5456	6185	2531	5688	5348	5861	3992	5913	5322	5049	4929	3778	5184	5095	5599
172	Coumarin	145.03	1	139662	0.876584	C05851	C9H6O2	-H(-)	100	172	145.03	ZYGHJZDHTFUPRJ-UHFFFAOYSA-N	Phenylpropanoids and polyketides	110	1505	104	1548	9050	7724	10851	9723	11100	8196	7320	8470	9782	8566	8987	10475	10284	9493	10558	9695	8195	8761	8566	4864	8182	7692	7874	6880	8458	8935	8170	7967	7214	7938	9432	9304
173	1(2H)-Phthalazinone	145.04	1	92041.3	0.361197	C14473	C8H6N2O	-H(-)	100	173	145.04	IJAPPYDYQCXOEF-UHFFFAOYSA-N	Organoheterocyclic compounds	1771	3990	1911	4014	24476	23336	23561	21348	22617	19015	18918	18443	20346	18038	21338	23658	22981	21083	24535	20226	18243	18011	19036	10429	18704	16059	16699	13578	20265	19061	17005	16693	13801	17356	18811	19818
174	Glutamine	145.062	1	2.46187e+06	0.859254	C00064; C00303; C00819; C05100; C16673	C5H10N2O3	-H(-)	100	174	145.062	ZDXPYRJPNDTMRX-VKHMYHEASA-N	Amino acids, peptides, and analogues	727	1234	657	1349	308985	312065	210512	206651	206033	179984	207804	151258	185021	168051	212679	233366	225503	214014	232826	168051	195983	159949	180198	61649	159736	121447	120514	90708	190925	143667	139906	115704	87733	146638	144887	169409
175	Lysine	145.098	1	687390	0.328225	C00047; C00739; C01142; C01186; C05161; C16440; C20277	C6H14N2O2	-H(-)	100	175	145.099	KDXKERNSBIXSRK-YFKPBYRVSA-N	Amino acids, peptides, and analogues	11057	19562	8192	21529	78166	96882	69290	64586	79892	58339	76334	46693	60895	52614	67673	63451	64460	59555	71432	49282	66794	47288	63498	19653	65380	56320	75306	73899	69781	70597	71191	92962	66566	73118	49391	51845
176	Indole-5,6-quinone	146.024	1	75534.4	0.339279	C05579; C11129	C8H5NO2	-H(-)	100	176	146.024	IGGVVGHJSQSLFO-UHFFFAOYSA-N	Organoheterocyclic compounds	5086	18454	5308	17968	36354	32982	40339	38679	38998	29847	31085	29972	38420	34953	34259	38230	39676	37744	38987	35021	31579	32344	37024	16153	34499	32191	33179	25497	35329	35222	32332	31828	23735	31737	33506	36291
177	Glutamate	146.046	1	917812	0.744768	C00025; C00217; C00302; C00979; C03618; C03790; C05574; C05938; C05941; C12269	C5H9NO4	-H(-)	100	177	146.046	WHUUTDBJXJRKMK-VKHMYHEASA-N	Amino acids, peptides, and analogues	452	716	345	516	56816	49377	51051	80899	28848	32635	45938	32143	92887	35554	35435	48563	56366	49388	37979	80704	70044	116637	87378	12655	94458	21216	20043	30425	99621	29944	94610	21162	24560	18300	25459	28034
178	5-Methylthiopentanaldoxime	146.065	1	242385	0.916435	C17245	C6H13NOS	-H(-)	100	178	146.065	KNFFJJFEYQLINT-FNORWQNLSA-N	Organic nitrogen compounds	223	331	161	375	32395	32728	28219	25608	25777	21652	24218	17569	23141	21457	25189	28941	27539	27138	29267	22656	23419	19404	22292	7752	21293	15403	16683	12840	22462	19626	17221	17228	12724	18363	20144	21462
179	Hydroxyglutarate	147.03	1	64460.4	0.766395	C00652; C00684; C00815; C01087; C01114; C02266; C02612; C02614; C02630; C02753; C02994; C03196; C03826; C05405; C06029; C06031; C06032	C5H8O5	-H(-)	100	179	147.03	CUOKHACJLGPRHD-JJYYJPOSSA-N	Carbohydrates and carbohydrate conjugates	5421	16957	5330	17495	33412	34518	35770	34798	36023	29884	34119	27517	32014	32047	32070	39573	33432	35033	33840	27282	29544	29490	34247	11772	33354	27544	30092	22173	29421	32531	33066	35665	22959	32375	31721	30466
180	Mevalonate	147.067	1	74035.4	0.795236	C00418; C00522; C02104; C03348; C04104; C06007; C06471	C6H12O4	-H(-)	100	180	147.067	KJTLQQUUPVSXIM-ZCFIWIBFSA-N	Lipids and lipid-like molecules	793	882	692	1044	19912	24218	18024	17877	17601	14404	16441	12771	14916	15867	19423	16742	16081	17801	18231	14626	14927	13246	14922	4482	14469	12874	12989	7230	14607	15810	14858	12653	7208	16667	14281	13848
181	4-Isopropylbenzaldehyde	147.082	1	26366.5	0.917978	C06577; C10428; C10452; C14309; C17965	C10H12O	-H(-)	100	181	147.082	WTWBUQJHJGUZCY-UHFFFAOYSA-N	Lipids and lipid-like molecules	1896	1916	2061	2259	8760	9257	7799	7134	7929	6332	8633	6091	7976	9382	8900	7828	9257	8844	8109	6231	7168	6852	6570	2452	7741	7010	7390	4935	7587	7040	7206	6118	4718	8215	7365	6747
182	Methionine	148.044	1	238890	0.347599	C00073; C00855; C01733; C07418	C5H11NO2S	-H(-)	100	182	148.044	FFEARJCKVFRZRR-BYPYZUCNSA-N	Amino acids, peptides, and analogues	4209	9145	3492	8868	18705	17222	20703	19896	21123	16084	16676	16359	19955	17028	18166	20692	20389	18715	19990	17479	18342	16982	18599	8570	18463	17436	18561	13372	18083	19086	18494	18288	13545	18521	18075	19021
183	Triethanolamine	148.097	1	5281.83	0.947518	C06771	C6H15NO3	-H(-)	100	183	148.097	GSEJCLTVZPLZKY-UHFFFAOYSA-N	Organic nitrogen compounds	204	256	193	342	727	711	767	775	707	611	699	618	675	616	695	749	762	761	784	599	669	631	776	292	704	772	658	628	780	716	756	654	580	606	693	666
184	alpha-Oxo-benzeneacetic acid	149.024	1	160953	-0.0374471	C02137; C03057; C10812	C8H6O3	-H(-)	100	184	149.024	FAQJJMHZNSSFSM-UHFFFAOYSA-N	Benzenoids	16754	2783	17423	3122	55510	48924	52460	52331	49851	48876	55008	46350	53095	45224	47569	57293	55364	51755	51361	47673	50372	48005	51922	26580	58102	51329	52968	45394	63400	50371	51684	47873	39923	43705	51606	54601
185	Pentose	149.046	1	164349	0.610387	C00121; C00181; C00216; C00259; C00309; C00310; C00312; C00476; C00508; C01394; C01488; C01508; C01510; C02096; C02204; C02205; C02479; C02604; C05052; C06115; C08346; C08353; C08354; C11476; C16639; C20569	C5H10O5	-H(-)	100	185	149.046	HMFHBZSHGGEWLO-SOOFDHNKSA-N	Carbohydrates and carbohydrate conjugates	819	725	490	871	21737	22011	18111	18709	18834	16721	24772	14845	18078	19084	18078	15236	20022	18587	17228	13652	17354	16318	19391	4134	18702	18439	19522	11143	22037	20652	18144	19586	9512	19081	19323	17621
186	Tolylacetate	149.061	1	124913	0.572548	C01963; C02646; C05629; C13342; C15513; C16706; C17883; C19291; C20697	C9H10O2	-H(-)	100	186	149.061	CDJJKTLOZJAGIZ-UHFFFAOYSA-N	Benzenoids	13925	15553	13246	18409	33568	34619	35197	34500	31934	27702	38961	28579	33634	37037	32588	31986	35976	35986	32503	27871	33532	31317	33369	12320	37716	34405	36626	26395	40495	34155	32845	30731	22150	30392	33337	35217
187	N-(Acetyloxy)benzenamine	150.056	1	39152.3	0.180799	C02709; C03005; C03522; C04350; C04353; C06804; C07301; C16571; C17755; C17756; C18623; C20634	C8H9NO2	-H(-)	100	187	150.056	BJKZXRGDVGYJTP-UHFFFAOYSA-N	Organic nitrogen compounds	9915	9129	9767	8196	19409	17913	19182	18885	19462	17123	20208	18033	18738	18576	20207	17946	19672	18278	18017	15929	18932	15974	22995	8143	21074	21482	21968	17540	24799	20460	19477	19374	14524	18257	18404	19483
188	3-Sulfinylpyruvate	150.972	1	2041.54	0.654546	C05527	C3H4O5S	-H(-)	100	188	150.971	JXYLQEMXCAAMOL-UHFFFAOYSA-N	Organic acids and derivatives	1182	1449	1017	1050	1472	1388	1983	1613	1813	1822	1760	1334	1553	1377	1675	1833	1521	1605	1615	1028	1336	1666	1357	1116	1730	1482	1838	1559	1426	1672	1786	1494	1285	1244	1507	1853
189	3-(Hydrohydroxyphosphoryl)pyruvate	150.98	1	2787.34	0.848278	C06368	C3H5O5P	-H(-)	100	189	150.98	VHAFWRWGHGSZDL-UHFFFAOYSA-N	Organic acids and derivatives	877	1116	819	1424	1874	1431	1861	1574	1620	1698	1597	1573	1497	1412	1438	2164	1799	1560	1881	1743	1558	1306	1691	919	1740	1515	1473	1506	1977	1398	1756	1631	1212	1293	1603	1504
190	Xanthine	151.026	1	19262.1	0.797726	C00385; C07599	C5H4N4O2	-H(-)	100	190	151.026	LRFVTYWOQMYALW-UHFFFAOYSA-N	Organoheterocyclic compounds	1549	2947	1649	3001	7515	7330	9531	9004	9221	7597	7895	7038	8940	6406	7865	8542	8221	8013	8269	7855	7586	7599	8993	3832	10503	9689	11870	8361	8491	9737	10236	10215	7463	7892	8274	8037
191	4-Hydroxyphenylacetate	151.04	1	112039	0.0805919	C00642; C00755; C01983; C01984; C02181; C02519; C02639; C02657; C03663; C04043; C05593; C05852; C10675; C10804; C12064; C12305; C13635; C13636; C14088; C14103; C14108; C17900	C8H8O3	-H(-)	100	191	151.04	XQXPVVBIMDBYFF-UHFFFAOYSA-N	Benzenoids	7966	45868	7851	46098	49862	46224	58761	57588	59331	46866	50273	45786	60714	42715	52395	61873	56294	55659	56026	50322	48935	48134	51755	25622	60230	50003	54667	42873	51139	57296	56923	51286	39409	42829	58790	55240
192	Xylitol	151.062	1	16843.9	0.832453	C00379; C00474; C00532; C01569; C01904	C5H12O5	-H(-)	100	192	151.062	HEBKCHPVOIAQTA-SCDXWVJYSA-N	Carbohydrates and carbohydrate conjugates	1425	3190	1513	2592	6995	6581	7241	7151	7379	6340	6840	6015	7281	6100	6926	7411	7212	7391	7036	6367	7206	6172	6927	3133	7323	6845	7129	5143	6768	7464	7648	8848	4810	5802	7209	6929
193	3-Isopropylcatechol	151.076	1	33160.9	0.104343	C01014	C9H12O2	-H(-)	100	193	151.076	XLZHGKDRKSKCAU-UHFFFAOYSA-N	Benzenoids	12364	10709	10941	11380	16165	14101	15243	14847	14488	14620	15369	12794	15915	14060	15102	14933	16065	14572	14964	14683	13727	12962	15189	9130	15143	15608	15603	13181	14366	15567	15054	16703	13083	14440	14725	15637
194	4-(Hydroxylamino)-N,N-dimethylaniline	151.088	1	10356.8	0.628466	C19681	C8H12N2O	-H(-)	100	194	151.088	OQCYOHPVXHQWSI-UHFFFAOYSA-N	Benzenoids	2914	2596	2443	2711	4652	4603	5203	4859	4162	4103	4818	4067	4877	4123	4072	4759	3871	4061	3915	4707	4088	3741	4067	2733	5185	4949	5212	4630	5018	5124	5329	4764	3757	5284	3792	4491
195	(+)-Camphor	151.113	1	9222.21	0.730266	C00808; C00809; C00964; C01123; C01499; C02213; C02452; C02759; C04435; C07271; C09847; C09859; C09885; C09893; C09906; C11387; C11395; C11398; C11401; C11408; C11409; C11412; C11415; C11938; C11941; C11942; C11951; C17623; C18018; C18369; C19081; C20260; C20425	C10H16O	-H(-)	100	195	151.113	DSSYKIVIOFKYAU-MHPPCMCBSA-N	Lipids and lipid-like molecules	2701	1321	2852	1298	3544	3789	4459	3787	4206	3766	4119	3245	4277	3695	4025	3826	3593	3650	3690	4143	3604	3490	3902	2409	4103	4515	4245	3983	4790	4431	4065	3877	2977	2889	3484	3882
196	Thiocysteine	151.984	1	10386.5	0.564341	C01962	C3H7NO2S2	-H(-)	100	196	151.984	XBKONSCREBSMCS-REOHCLBHSA-N	Amino acids, peptides, and analogues	2914	5379	1946	3700	3151	4643	4872	3707	4368	3604	4129	3340	4441	4208	5194	3934	3909	4565	4160	3410	4384	3966	4206	2164	4623	4236	4185	3894	4747	4864	6096	5237	4100	4414	4070	4277
197	Fosamine	152.012	1	15140.7	0.820668	C18789	C3H8NO4P	-H(-)	100	197	152.012	UCHDFLNGIZUADY-UHFFFAOYSA-N	Organic acids and derivatives	1186	1573	1164	1449	5275	4972	5499	5203	5055	4714	5064	5093	4722	4359	5387	5278	5320	5459	5881	4715	4823	4689	5272	2797	5938	5423	5279	4952	6252	5388	5853	5355	4610	4784	5228	6055
198	3-Hydroxyanthranilate	152.036	1	108297	-0.334854	C00632; C01270; C02518; C06669; C07555; C11343; C12107; C12115; C16235; C19270	C7H7NO3	-H(-)	100	198	152.036	WJXSWCUQABXPFS-UHFFFAOYSA-N	Benzenoids	97725	99458	94842	100869	106133	102808	108788	105295	101393	91906	106831	90590	105960	107306	105183	108520	107234	101224	105260	100626	98674	96695	101810	59412	111182	105102	99904	85178	105807	101386	102650	103260	84093	104607	99653	99362
199	1,2-Diamino-4-nitrobenzene	152.046	1	27274.4	0.696385	C19384; C19385	C6H7N3O2	-H(-)	100	199	152.046	RAUWPNXIALNKQM-UHFFFAOYSA-N	Benzenoids	9296	17923	8832	18865	19965	19841	19874	17845	20142	18189	20875	18693	18495	17587	21036	22611	19462	20533	19834	17063	20934	20550	18567	10628	17808	21065	19533	16900	16517	19054	23222	20320	16161	17371	20852	20180
200	4,6-Diamino-5-formamidopyrimidine	152.059	1	10983.5	-0.210642	C06502	C5H7N5O	-H(-)	100	200	152.059	MVYUVUOSXNYQLL-UHFFFAOYSA-N	Organoheterocyclic compounds	4569	6783	4009	6337	7611	7119	7562	7025	7305	6963	7671	6834	7210	7518	8318	8158	7531	8026	8041	6549	7755	7367	7691	4107	8585	7806	8033	6103	6887	7445	8131	7542	6000	7505	7210	7754
201	Dopamine	152.072	1	39445.2	0.0281848	C03758; C04227; C16666	C8H11NO2	-H(-)	100	201	152.071	VYFYYTLLBUKUHU-UHFFFAOYSA-N	Benzenoids	5147	4394	5317	4681	8645	7347	8056	7813	7745	7146	8245	6826	8415	7605	7888	8105	7908	7713	7705	7098	8239	7656	7937	3644	8523	8155	8287	5929	8428	7768	8457	8003	6353	8004	7663	7460
202	2,3-Dihydroxybenzoate	153.019	1	41839.3	0.553782	C00196; C00230; C00628; C16748	C7H6O4	-H(-)	100	202	153.019	GLDQAMYCGOIJDV-UHFFFAOYSA-N	Benzenoids	9461	11669	8938	12365	24585	18981	20459	19263	17697	19354	19469	17934	17530	16942	17806	19537	19109	21593	22110	16648	17880	17341	20053	9221	20203	19556	19662	16058	21133	18629	19264	17949	13109	15831	16697	20709
203	Vanillyl alcohol	153.056	1	135732	0.467919	C06317; C10787	C8H10O3	-H(-)	100	203	153.056	ZENOXNGFMSCLLL-UHFFFAOYSA-N	Benzenoids	335	3457	352	3955	15671	10553	10984	12146	12795	10739	16379	10368	11745	7648	10676	15206	13253	14529	13555	11280	12160	10614	11690	5100	13490	12176	12045	11002	11929	12570	11732	10836	7996	7729	11598	14242
204	C9:2	153.092	1	39912.4	-0.276988	C09772	C9H14O2	-H(-)	100	204	153.092	VGWJUWSHYRJZKH-BWZBUEFSSA-N	Lipids and lipid-like molecules	16031	15112	14990	15083	23710	20286	19405	21753	20750	19965	24705	18626	20984	18214	20053	23645	21312	23346	21285	20544	21337	19009	20987	10260	22751	21613	22527	19624	21030	23307	20347	22239	15189	17376	18595	22053
205	(-)-Menthone	153.128	1	10193.4	0.868518	C00843; C01411; C01500; C01765; C01766; C02344; C02462; C02484; C03039; C03985; C09844; C09848; C09871; C09902; C11384; C11388; C11389; C11390; C11393; C11396; C11397; C11399; C11400; C11410; C11411; C11413; C11416; C11952; C16772; C16909; C17073; C17125; C17384; C17517; C17518; C17611; C18017; C20261	C10H18O	-H(-)	100	205	153.128	NFLGAXVYCFJBMK-BDAKNGLRSA-N	Lipids and lipid-like molecules	1052	316	854	292	3942	3521	3611	3004	3330	3510	4278	2721	3553	3286	2433	4332	3494	3587	3198	2535	3217	2946	3051	1774	3453	3394	2908	2979	4046	3106	3223	2699	2244	2691	3054	3299
206	Histidine	154.062	1	989382	0.432033	C00135; C00768; C01162; C06419	C6H9N3O2	-H(-)	100	206	154.062	HNDVDQJCIGZPNO-YFKPBYRVSA-N	Amino acids, peptides, and analogues	9089	16884	6792	23136	63139	74835	58009	58946	78191	57034	73145	54764	66196	58493	60272	65100	62485	57166	53973	56541	101342	51997	66182	26982	69856	59589	77570	80297	76620	76254	69059	99033	62078	66893	72107	54705
207	Potassium 2,6-dihydroxytriazinecarboxylate; 2,5-Furandicarboxylate	154.998	1	43772.9	0.64034	C15997; C20450	C4H2N3O4.; C6H4O5	-H(-); -H(-)	100	207	154.998	IAPCTXZQXAVYNG-UHFFFAOYSA-M	Organoheterocyclic compounds	954	1225	856	1614	8568	2484	5380	9444	6715	3727	8232	6834	9089	8536	6851	7129	7270	4983	2486	7251	8339	5612	9873	3666	9323	10579	9367	8832	10994	7628	7995	2558	6540	9018	5785	7615
208	Orotate	155.009	1	12013.4	0.826895	C00295; C03030	C5H4N2O4	-H(-)	100	208	155.009	PXQPEWDEAKTCGB-UHFFFAOYSA-N	Organoheterocyclic compounds	1388	1277	1536	1641	4328	2145	3340	4748	3612	2509	4542	3692	4703	4563	3896	4351	3907	3296	1812	4015	4133	3101	5221	2217	4839	5384	4871	4728	5306	4207	4503	1942	3511	4909	3225	4159
209	C9:1	155.108	1	36424.9	0.085551	C02445; C08471; C08501	C9H16O2	-H(-)	100	209	155.108	ZDYWPVCQPUPOJV-UHFFFAOYSA-N	Carbonyl compounds	9636	17831	9755	18050	26089	26506	21866	21102	31921	37565	37895	34981	32532	40738	15555	41142	21303	31543	18715	16365	19021	21129	16832	16451	18379	18319	16318	18305	26602	18769	16490	14341	15205	16272	15214	18576
210	(-)-Menthol	155.145	1	6567.82	0.414941	C00400; C00553; C09849; C11386; C12307	C10H20O	-H(-)	100	210	155.144	NOOLISFMXDJSKH-KXUCPTDWSA-N	Lipids and lipid-like molecules	4515	5084	4355	3593	3288	4100	3814	3493	3427	4305	4463	3858	4354	3468	4471	4978	4181	4300	3774	3401	4129	4319	4131	2657	3659	4595	3972	3851	3981	4846	4794	4089	3640	4401	3812	5026
211	2-Aminomuconate	156.031	1	12750.3	0.814767	C02220; C14293; C17358	C6H7NO4	-H(-)	100	211	156.031	ZRHONLCTYUYMIQ-TZFCGSKZSA-N	Amino acids, peptides, and analogues	1069	1297	985	1250	4048	3945	4428	4346	3572	3696	3865	3501	4205	4047	4310	4639	3979	4148	5066	3782	4254	3945	4846	1679	4438	4246	4575	3389	5632	3907	4299	3510	2469	3901	3945	4861
212	1-Nitrosonaphthalene	156.045	1	10600.6	0.832997	C14788	C10H7NO	-H(-)	100	212	156.045	HXOPMUIUKYURIC-UHFFFAOYSA-N	Benzenoids	454	1001	428	905	2798	2690	3010	2917	2211	2255	2497	2477	2440	2182	2898	3336	2932	2827	3459	4076	2897	3109	3000	1655	3360	2624	2677	2519	2669	2666	3309	2316	1883	2148	2011	3260
213	Paramethadione	156.067	1	28706.4	0.518383	C07411; C17361; C17724; C20828	C7H11NO3	-H(-)	100	213	156.067	VQASKUSHBVDKGU-UHFFFAOYSA-N	Organoheterocyclic compounds	2302	1590	2281	1773	7476	7993	6826	7171	5922	6292	7977	6146	6951	6512	7381	6525	6958	7341	6498	5781	7201	5960	7461	2715	7312	6911	7330	6114	9040	7763	7590	7455	5435	6966	6428	5803
214	Allantoin	157.037	1	87035.2	0.902276	C01551; C02348; C02350	C4H6N4O3	-H(-)	100	214	157.037	POJWUDADGALRAB-UHFFFAOYSA-N	Organoheterocyclic compounds	3500	4344	3412	4587	10318	10821	10379	10058	9131	8599	11233	8422	9307	9248	8938	9128	9273	9344	10458	8702	9738	8993	10479	4087	13363	12344	11730	9796	13714	14300	13554	12345	10535	12143	8383	9082
215	Ethyl 3-oxohexanoate	157.087	1	63961.2	0.376076	C02975; C16652; C16655	C8H14O3	-H(-)	100	215	157.087	KQWWVLVLVYYYDT-UHFFFAOYSA-N	Organic acids and derivatives	54464	58917	48656	58690	41170	44858	41577	48367	41427	39805	45454	39411	47506	45820	46599	39346	41842	39108	41397	43490	43821	39102	46111	21154	46183	46420	55650	36955	45470	45666	41040	47845	32893	48075	36077	40987
216	Nonanoic acid	157.124	1	423683	0.252222	C01601	C9H18O2	-H(-)	100	216	157.124	FBUKVWPVBMHYJY-UHFFFAOYSA-N	Lipids and lipid-like molecules	331947	318560	312117	335110	275168	321630	243333	237603	233483	228778	262228	226349	252460	293755	271945	220387	239883	240975	234153	222329	233312	226130	243673	123677	259443	271366	272786	198134	263437	250785	244437	253708	189342	275797	228917	257610
217	4-Methylene-L-glutamate	158.046	1	16599.9	0.726994	C00651; C03623	C6H9NO4	-H(-)	100	217	158.046	RCCMXKJGURLWPB-BYPYZUCNSA-N	Amino acids, peptides, and analogues	2103	1786	1789	2264	8268	8031	8734	7778	6879	6112	8136	6221	7296	7124	7781	7843	8625	7631	7836	7049	7847	6700	7913	3026	8139	7821	8197	6062	9240	8349	8117	6968	5188	7792	6618	6782
218	Indole-3-acetaldehyde	158.061	1	46880.1	0.360599	C00637; C06345; C10663; C14789	C10H9NO	-H(-)	100	218	158.061	WHOOUMGHGSPMGR-UHFFFAOYSA-N	Organoheterocyclic compounds	5883	15564	6447	14975	30277	28783	36927	33788	24665	26551	27398	29847	23497	22762	33062	34879	28809	30264	36358	45379	32201	36145	33340	19673	39664	30577	31155	28647	27239	33605	37513	31531	25518	23351	21266	33948
219	5-Acetamidopentanoate	158.082	1	30689	0.589391	C03087; C08269; C10151; C10850	C7H13NO3	-H(-)	100	219	158.082	TZZSWAXSIGWXOS-UHFFFAOYSA-N	Lipids and lipid-like molecules	1763	2900	1585	3013	12283	13222	13709	12133	11639	11651	15123	8753	12674	14326	12325	13311	12939	11768	12366	10799	13365	13920	15161	2474	17709	16114	16489	9793	19361	15398	16577	14536	10052	15488	11967	13475
220	Naphthalene-1,2-diol	159.045	1	26831.1	0.925906	C03012; C07719; C07726; C14785; C16213	C10H8O2	-H(-)	100	220	159.045	NXPPAOGUKPJVDI-UHFFFAOYSA-N	Benzenoids	2037	4108	2085	4238	6100	5781	6423	6059	6283	5564	5793	5610	6166	5768	5720	6123	6203	5844	6338	5923	5731	5425	6021	3285	6511	5788	5797	5667	7735	6597	5785	5330	5109	5976	5973	6022
221	Pimelate	159.066	1	43373.3	0.578726	C02656; C04687; C16657	C7H12O4	-H(-)	100	221	159.066	WLJVNTCWHIRURA-UHFFFAOYSA-N	Lipids and lipid-like molecules	17888	30438	16153	34665	30273	34346	27080	27663	28797	25948	29306	21140	23781	28210	33483	25648	25653	27048	29429	25257	24317	21332	26936	9734	26451	24064	28121	17615	25258	44315	29334	26112	18169	32170	25409	22796
222	Propylhydroxypentanoic acid	159.103	1	20853.5	0.569483	C03864; C03865; C16649; C16650; C16651; C17527; C20793	C8H16O3	-H(-)	100	222	159.103	LYRIITRHDCNUHV-SSDOTTSWSA-N	Organic acids and derivatives	9699	12729	9128	13516	12764	15045	12890	14097	11658	12114	14348	11015	11764	12045	16507	12566	12744	14137	12533	12120	13049	10339	13936	6373	14871	14795	17327	12856	15887	15951	14133	14743	11563	15220	10643	12951
223	Methyl-Lys	159.116	1	6437.78	0.700523	C02728	C7H16N2O2	-H(-)	35	223	159.115	PQNASZJZHFPQLE-LURJTMIESA-N	Amino acids, peptides, and analogues	1095	1509	919	1293	3189	4123	3447	3280	3205	3434	3518	2537	3192	3297	3952	3487	3414	3069	2924	3233	4731	2801	3553	1708	3814	3388	3957	3067	3358	3646	3589	4095	2991	3246	3650	2898
224	4,8-Dihydroxyquinoline	160.04	1	61736.7	0.268847	C05637; C05639; C06330; C06342; C11503; C16716; C19837	C9H7NO2	-H(-)	100	224	160.04	PYELIMVFIITPER-UHFFFAOYSA-N	Organoheterocyclic compounds	12764	10470	13054	11332	25889	25953	28372	25627	25232	24884	27439	23552	27326	23984	26581	26884	26109	26302	27664	25009	26575	24965	27649	16397	30459	26301	29385	27156	29070	31732	29749	30742	25310	27181	25234	28464
225	Aminoadipate	160.061	1	29464.6	0.836463	C00956; C01046; C01077; C02207; C03210; C05016; C06234; C17581; C19694	C6H11NO4	-H(-)	100	225	160.061	OYIFNHCXNCRBQI-BYPYZUCNSA-N	Amino acids, peptides, and analogues	2058	2088	2185	2003	8590	8200	8503	7305	8285	6735	9067	6010	6727	7196	7607	10227	7610	7400	7030	6131	7707	7345	8447	2325	11852	9117	11058	9200	11335	15179	22140	17928	11982	14824	6760	7555
226	Indole-3-ethanol	160.076	1	10447.4	0.919505	C00955; C09915	C10H11NO	-H(-)	100	226	160.076	MBBOMCVGYCRMEA-UHFFFAOYSA-N	Organoheterocyclic compounds	796	669	950	901	3280	3483	3658	3250	2764	2793	3446	2671	2676	3206	2965	3031	2961	2815	2921	2677	3051	2840	3025	1469	3803	2974	3497	2966	3723	4588	5303	4893	3327	4091	2348	3360
227	Allicin	161.011	1	255733	0.912203	C07600	C6H10OS2	-H(-)	100	227	161.011	JDLKFOPOAOFWQN-UHFFFAOYSA-N	Organic acids and derivatives	7775	35008	6458	31247	84180	85312	77500	78614	70128	61055	80252	52679	74353	82131	67563	80848	75106	76506	80568	53219	67585	67798	74072	19481	87463	77022	75893	41909	98968	76872	82926	75840	42376	83443	65743	70147
228	Umbelliferone	161.024	1	76169.6	0.91449	C09315; C20414	C9H6O3	-H(-)	100	228	161.024	ORHBXUUXSCNDEV-UHFFFAOYSA-N	Phenylpropanoids and polyketides	7607	37538	7590	42155	78755	58012	65092	68482	71408	64172	61185	59195	73872	58279	65320	71793	68659	67152	74249	68211	60519	58881	58553	37487	71674	64222	63087	52477	57768	66831	63649	54871	49963	57502	67932	67012
229	Hydroxyadipate	161.045	1	229176	0.856839	C00478; C01088; C01989; C02360; C02488; C02991; C03652; C03761; C03827; C03979; C06158; C06159; C06474; C06478; C06485; C11592; C16390; C17209; C18028	C6H10O5	-H(-)	100	229	161.045	CXKKSSKKIOZUNR-ZLUOBGJFSA-N	Alcohols and polyols	3367	13064	2939	14259	61023	75785	62061	63005	62483	56070	70657	45543	55731	64295	63393	63643	61323	66546	66179	53012	53452	49716	57406	18801	62166	57548	65685	39323	57559	65961	67288	50521	37037	70870	54751	55415
230	cis-1,2-Dihydronaphthalene-1,2-diol	161.061	1	136114	0.907099	C04314; C04514; C06205; C06358; C10472; C10475; C10490; C12088; C15419; C20269	C10H10O2	-H(-)	100	230	161.061	QPUHWUSUBHNZCG-VHSXEESVSA-N	Benzenoids	318	6589	353	7303	17927	15993	20345	19637	20106	14521	15549	14719	19098	18860	17915	20404	20373	19777	20143	17290	16964	17480	18248	7284	16631	16941	17234	10927	17037	17070	17458	16465	11088	17181	18011	17892
231	Cymarose	161.082	1	38474.6	0.732647	C08234; C08237	C7H14O4	-H(-)	100	231	161.082	DBDJCJKVEBFXHG-XZBKPIIZSA-N	Carbohydrates and carbohydrate conjugates	1608	2159	1498	2298	12285	11771	13557	13051	12295	9690	10201	9356	12041	11839	12004	13316	12906	12987	13399	11032	10780	10765	11753	4038	10712	10676	10799	6256	10701	11001	10857	10239	6325	11050	11083	11802
232	Amino-dideoxy-hexose	162.077	1	13101	0.877759	C10141; C10143; C15478; C15479; C16843; C17580; C20311	C6H13NO4	-H(-)	100	232	162.077	LXBIFEVIBLOUGU-KVTDHHQDSA-N	Organoheterocyclic compounds	270	867	323	612	3327	3474	3885	3393	3554	2709	3305	2642	3365	3530	3517	3276	3667	3429	3680	3107	3106	3202	3393	1235	3304	3277	3169	2206	3901	3400	3476	2994	2499	3302	3488	3390
233	2-Dehydro-D-xylonate	163.025	1	33081.9	0.912886	C02928	C5H8O6	-H(-)	100	233	163.025	NKOHBIIOWAKHMF-GBXIJSLDSA-N	Carbohydrates and carbohydrate conjugates	4041	12732	3363	16467	19716	31754	26585	29028	24181	23296	25899	21172	23447	25713	19136	25031	23146	27139	21974	17914	21547	23119	23058	8992	29073	26007	27626	17533	21658	22201	22325	29138	18873	28797	17646	21988
234	Coumarate	163.04	1	123550	0.752763	C00166; C00811; C01772; C02763; C05838; C06738; C07114; C10945; C12621	C9H8O3	-H(-)	100	234	163.04	BTNMPGBKDVTSJY-UHFFFAOYSA-N	Benzenoids	4057	7777	4318	9084	42529	37614	45506	45228	47007	38633	35984	39269	42859	35674	41050	44755	41463	42141	41564	38960	37612	39059	38849	22573	50662	40350	40979	33265	46575	42808	42046	38072	33513	37140	40572	43364
235	Ricinine	163.052	1	37809.6	0.854295	C01526	C8H8N2O2	-H(-)	100	235	163.052	PETSAYFQSGAEQY-UHFFFAOYSA-N	Organoheterocyclic compounds	2475	3535	2387	4133	16162	16059	16921	16708	17611	14104	15848	14026	16516	15225	15865	15530	15893	16504	16251	14822	13595	13812	15914	7218	16426	16060	16987	11634	18093	17081	15779	15571	10902	15912	16664	15547
236	Deoxyhexose	163.061	1	79203.6	0.718857	C00507; C00586; C00861; C01018; C01019; C01684; C01721; C02095; C02338; C02431; C02476; C02522; C02781; C07326; C08258; C08259; C08352; C16538; C20835; C20836	C6H12O5	-H(-)	100	236	163.061	SHZGCJCMOBCMKK-JFNONXLTSA-N	Carbohydrates and carbohydrate conjugates	911	2152	950	2250	28833	27897	22390	23721	24339	21331	28393	19959	24057	24084	24077	19115	24632	24340	23400	20783	20512	18714	23545	5142	21967	23726	24856	13967	26554	25780	22165	26021	12018	26757	23508	21221
237	Cumate	163.077	1	54526.8	0.804802	C06578; C09858; C09904; C09905; C10453; C10469; C12303; C19229; C19729	C10H12O2	-H(-)	100	237	163.077	CKMXAIVXVKGGFM-UHFFFAOYSA-N	Lipids and lipid-like molecules	5446	8161	5404	8966	19880	19012	17100	17349	17699	15374	19551	14993	17314	17714	17835	14797	17673	17438	17824	15825	15438	14406	16821	5395	16776	17554	18337	11373	19560	18692	16467	18826	9922	18811	17236	16287
238	Fenuron	163.088	1	14739.1	0.906432	C11224	C9H12N2O	-H(-)	100	238	163.088	XXOYNJXVWVNOOJ-UHFFFAOYSA-N	Benzenoids	1549	2216	1519	2361	8299	7701	6613	6060	6839	6149	8100	6118	6214	7009	7174	6177	6737	7281	6558	5636	6318	5819	6527	2237	5657	7085	6967	4271	6412	7006	6978	7444	3758	7582	6444	6517
239	Jasmone	163.113	1	19897.5	0.296969	C08490; C14226; C14466; C14697	C11H16O	-H(-)	100	239	163.113	XMLSXPIVAXONDL-PLNGDYQASA-N	Carbonyl compounds	13512	12314	13132	11672	14177	14378	13643	13963	14406	13212	13980	13532	14576	14322	15242	13167	14883	14119	13315	14566	12873	12482	13436	8035	14391	14790	13838	11312	13175	15978	15460	15761	11944	13629	13824	13251
240	Phenylalanine	164.072	1	1.1576e+06	0.623824	C00079; C02057; C02265; C07527; C18090; C18747; C19565; C19578; C20487; C20488	C9H11NO2	-H(-)	100	240	164.071	COLNVLDHVKWLRT-QMMMGPOBSA-N	Amino acids, peptides, and analogues	18068	65522	14578	49638	159445	150707	175078	183304	196813	128544	165805	133817	177175	161548	162248	174082	173210	168767	176291	149779	170864	156603	180092	57532	193353	192880	193219	129368	222858	225432	210209	229852	149603	226558	162042	168626
241	Thiodiacetic acid sulfoxide	164.984	1	12039.6	0.931115	C14873	C4H6O5S	-H(-)	26	241	164.984	AUKDKWLCVXCCBN-UHFFFAOYSA-N	Organic acids and derivatives	13002	10313	11233	9675	7671	7011	8585	7876	7562	6953	7906	6385	6776	7207	7849	8195	8528	7677	8145	6566	7278	8484	8269	3849	7870	6762	7546	6250	8201	7782	7974	7932	6462	6713	7015	7823
242	Phthalate	165.02	1	70720.5	0.672802	C01606; C03590; C06337; C14096; C14100	C8H6O4	-H(-)	100	242	165.02	XNGIFLGASWRNHJ-UHFFFAOYSA-N	Benzenoids	9835	12127	8885	13824	28991	31874	30880	29438	26949	28590	33426	27090	27263	24980	23849	26986	27956	33331	29897	22261	24360	26096	28137	10779	32882	29270	30643	26167	31856	29520	28126	31679	22115	26500	26517	27942
243	Pentonic acid	165.04	1	325613	0.352086	C00502; C00545; C00878; C01685; C05411; C05412	C5H10O6	-H(-)	100	243	165.04	QXKAIJAYHKCRRA-FLRLBIABSA-N	Carbohydrates and carbohydrate conjugates	4738	14150	5066	14330	102449	108788	107929	97051	98902	81804	114981	73548	94749	99781	85348	94032	98564	96244	95296	66780	85826	88260	97336	27418	111275	92902	97675	65608	118283	100727	102638	99438	65284	96351	94819	86996
244	Pyridoxal	166.051	1	44617.4	0.102088	C00250; C03493; C03986; C05831; C06051; C12323; C14170; C14171; C20821	C8H9NO3	-H(-)	100	244	166.051	RADKZDMFGJYCBB-UHFFFAOYSA-N	Organoheterocyclic compounds	3253	4466	3097	4953	15324	17031	16332	16469	15817	13767	15733	13315	15151	15844	15707	16183	15813	16250	16203	13685	15044	15082	15596	6927	16180	15259	15578	11489	17549	14879	15078	15274	10965	15112	14499	15349
245	2,4-Diamino-6-nitrotoluene	166.063	1	17190	0.0583518	C16396; C16397	C7H9N3O2	-H(-)	100	245	166.063	DFZSBQYOXAUYCB-UHFFFAOYSA-N	Benzenoids	2127	3402	1986	3467	7753	7492	7863	7559	7582	6922	7452	6928	7245	7314	7305	8061	7629	7855	7328	7207	7640	7413	7305	3639	7452	7790	7338	6066	7695	7472	7928	7569	5542	7547	7164	7960
246	(-)-Sympatol	166.087	1	9618.25	0.698903	C01869; C04548; C05587; C07146; C07441; C07453; C07832; C08273; C19582	C9H13NO2	-H(-)	100	246	166.087	YRCWQPVGYLYSOX-VIFPVBQESA-N	Benzenoids	1926	2330	2080	2657	3901	3869	4009	3918	3897	3266	4068	3298	3970	3116	3829	3975	3442	3639	3864	3022	3574	3582	3537	1682	4322	4065	4202	3438	4403	4171	4675	3935	3051	4101	3426	3545
247	Urate	167.021	1	38527.3	0.121377	C00366	C5H4N4O3	-H(-)	100	247	167.021	LEHOTFFKMJEONL-UHFFFAOYSA-N	Organoheterocyclic compounds	1428	2804	1503	2786	12744	9635	12211	11015	10501	11308	12726	10542	10620	11599	10443	12416	11495	10665	9404	8924	12636	11430	11415	5389	15506	13439	13856	12285	16776	14415	15724	11003	11395	13136	9814	12269
248	N-Cyclopropylammelide	167.056	1	40370.2	0.891267	C14149	C6H8N4O2	-H(-)	65	248	167.056	BLNVGTGPKHCQME-UHFFFAOYSA-N	Organoheterocyclic compounds	3771	3675	3536	3559	21039	20725	17788	16274	16395	15454	16413	14543	15374	15801	18508	20256	17095	18172	19280	14355	16141	14869	16603	7065	15678	14041	13675	10468	18467	14794	14831	13865	10027	15116	14429	15426
249	N-Cyclopropylammelide	167.058	1	34377.2	0.940113	C14149	C6H8N4O2	-H(-)	100	249	167.058	BLNVGTGPKHCQME-UHFFFAOYSA-N	Organoheterocyclic compounds	3200	3199	3154	3135	17980	18017	15950	14085	14367	13751	14001	12925	13396	13797	16402	17991	14796	15687	16459	12968	13766	13468	14794	6364	13471	11991	12090	9173	16049	12595	13093	11671	8542	13077	12367	13693
250	N-Trimethyl-2-aminoethylphosphonate	167.072	1	38204.1	0.514602	C06459	C5H15NO3P	-H(-)	100	250	167.071	VCANKBLUHKRQLL-UHFFFAOYSA-O	Organic acids and derivatives	9658	8898	9660	10142	18564	17989	16285	15488	15331	15041	16824	14202	15710	15598	17147	16357	16440	16575	16042	15068	15451	14280	16023	8424	16478	14921	14229	11717	16993	15068	15064	13480	11714	15088	12721	15239
251	Pyridoxamine	167.083	1	13985.2	0.640986	C00534; C11846; C13710	C8H12N2O2	-H(-)	100	251	167.083	NHZMQXZHNVQTQA-UHFFFAOYSA-N	Organoheterocyclic compounds	2447	2399	2427	2553	6345	6409	5892	5726	5918	5903	5627	5291	6142	5621	5775	6161	5614	5964	5393	5433	5380	5642	5885	3039	5717	5504	5716	4940	6442	6159	5406	5332	4460	5756	5187	5741
252	C10:2	167.108	1	22967.4	-0.0265386	C00848; C02108; C03448; C06069; C08489; C08498; C08546; C09785; C09786; C09804; C09836; C09842; C09854; C11402; C11403; C11414; C11418; C11651; C11937; C11943; C11944; C16461; C18019; C19083; C19731; C20221; C20222; C20223; C20322; C20323	C10H16O2	-H(-)	100	252	167.108	CCBAAZXPXFYPBE-UHFFFAOYSA-N	Organoheterocyclic compounds	13801	11475	13120	12296	15837	16445	14166	14676	13882	14336	14477	16017	15167	13956	14693	14295	13335	15140	14898	15882	13627	13612	15470	12395	15371	14809	14848	13414	14930	15042	13683	13544	14807	14019	13007	13383
253	2-Methylisoborneol	167.144	1	13922.4	0.443378	C20243	C11H20O	-H(-)	100	253	167.144	LFYXNXGVLGKVCJ-BOBPJJCASA-N	Lipids and lipid-like molecules	4917	4152	4455	4958	5390	4467	4769	4911	4131	4389	4123	4917	4981	4176	4630	4621	5034	4979	5270	4446	4551	4619	4563	3114	6147	4485	5134	4256	4886	4510	5235	3915	3409	5852	4524	5005
254	Phosphodimethylethanolamine	168.043	1	80973.9	0.596242	C13482	C4H12NO4P	-H(-)	100	254	168.043	BLHVJAAEHMLMOI-UHFFFAOYSA-N	Organic acids and derivatives	1242	2864	1209	2921	23397	15491	21741	19624	18454	14354	19550	12585	19579	25619	21934	18869	22196	16317	21214	17673	23864	24144	22799	5850	24344	22935	23998	12762	30481	23150	30418	23623	10730	26141	20132	16357
255	Pyridoxine	168.066	1	20223	0.643635	C00314; C00547	C8H11NO3	-H(-)	100	255	168.066	LXNHXLLTXMVWPM-UHFFFAOYSA-N	Organoheterocyclic compounds	1745	1692	1596	1924	7549	6325	6928	6389	6402	5508	6308	5347	6282	7724	7268	6281	6764	6158	7046	5902	7612	7088	7416	2648	7510	7354	7872	4628	8929	7726	8261	7075	4256	8169	6944	6223
256	Methyl-His	168.079	1	9572.42	0.764047	C01152; C03298	C7H11N3O2	-H(-)	100	256	168.078	JDHILDINMRGULE-LURJTMIESA-N	Amino acids, peptides, and analogues	1282	1518	1288	1610	4177	3289	4170	3745	3190	3388	3855	2947	3488	4217	4336	3939	3891	3629	3775	4120	4081	4171	4127	2277	4213	3950	4242	3427	4447	4157	4941	4044	2929	4215	3314	3562
257	Piperidione	168.103	1	5704.56	0.790383	C17730	C9H15NO2	-H(-)	100	257	168.103	RGEVWUKXWFOAID-UHFFFAOYSA-N	Organoheterocyclic compounds	1508	2045	1105	2085	3128	2911	2959	3077	2759	2809	2887	2661	2931	3047	3074	2637	2872	3445	2661	2343	2696	2942	3672	1514	4965	4538	5336	3349	5395	3955	4359	3541	2658	3891	2390	3255
258	Nitramine	168.139	1	1139.21	0.936364	C10163; C10773	C10H19NO	-H(-)	100	258	168.139	POCJOGNVFHPZNS-ZJUUUORDSA-N	Organoheterocyclic compounds	368	351	462	470	784	789	559	629	680	736	605	728	546	718	611	463	626	707	644	637	838	839	718	467	640	598	796	706	686	751	617	668	739	700	580	770
259	Thiourocanic acid	169.007	1	25823.8	0.859187	C05571	C6H6N2O2S	-H(-)	100	259	169.007	ZBKFFCZXHBPGFK-OWOJBTEDSA-N	Organoheterocyclic compounds	6719	6120	6403	7433	24593	24173	22039	21841	21343	20726	22557	18023	19271	22638	21167	21601	20689	22279	23604	19996	19761	18699	22646	8922	24558	21942	22414	17350	26208	23675	23366	21226	15410	22251	19230	19870
260	Gallate	169.014	1	39116.3	0.671796	C01424	C7H6O5	-H(-)	100	260	169.014	LNTHITQWFMADLM-UHFFFAOYSA-N	Benzenoids	16000	15329	15927	15987	33321	31462	31124	33241	30074	29340	33972	29946	31877	30821	29959	30321	29691	32205	30184	29896	32619	31562	34582	15917	33894	32151	33159	24509	38542	29935	31131	28675	22743	33167	27764	31398
261	3,4-Dihydroxyphenylethyleneglycol	169.051	1	33634.1	0.76083	C05576; C06720; C06729; C06731; C07123; C16804; C19495	C8H10O4	-H(-)	100	261	169.05	MTVWFVDWRVYDOR-UHFFFAOYSA-N	Benzenoids	5286	6011	5309	6886	16736	14623	18022	16261	14678	13206	16527	12986	15025	16643	16759	15026	17296	15926	18832	15595	16524	14600	17404	7737	17861	16896	19145	13385	23852	19608	17465	13615	11036	14854	16076	18166
262	2-Hydroxybiphenyl	169.065	1	30228.4	0.632645	C02499; C14224; C14342	C12H10O	-H(-)	100	262	169.065	LLEMOWNGBBNAJR-UHFFFAOYSA-N	Benzenoids	7171	9982	8371	11358	12602	13078	16354	12269	12476	10221	13865	12602	13002	20565	14888	14404	14249	17282	14297	9827	11391	11998	12537	5848	19427	16806	18346	15154	21818	15326	14618	13173	13095	14453	13494	14945
263	Furfural diethyl acetal	169.088	1	49837.3	0.204633	C14280	C9H14O3	-H(-)	100	263	169.088	SEILDMUKBMYIEZ-UHFFFAOYSA-N	Organoheterocyclic compounds	35542	35605	33394	36781	33506	35101	32328	36395	32396	31727	34385	29496	34805	33773	35099	33088	33013	32800	32312	29396	37141	31181	33347	17723	40615	37684	39587	31279	36240	37889	37294	36680	26795	36254	32173	35572
264	Levetiracetam	169.099	1	11383.3	0.815591	C07841	C8H14N2O2	-H(-)	100	264	169.099	HPHUVLMMVZITSG-LURJTMIESA-N	Amino acids, peptides, and analogues	6099	6403	5522	6022	7532	7900	8794	7588	8611	6266	8550	6779	8885	8004	9039	8436	7296	7845	7909	6716	7869	6750	7682	4391	8848	8673	9391	7185	8240	8981	9114	7318	6558	7711	7622	7814
265	C10:1	169.123	1	26597.6	-0.108645	C03092; C04433; C07276; C09790; C16462; C17621; C18020; C18027; C18066; C18202; C19082; C20326	C10H18O2	-H(-)	100	265	169.124	YVCUGZBVCHODNB-ZCUBBSJVSA-N	Organoheterocyclic compounds	18884	18980	19829	19243	20376	20667	17724	18711	18222	18911	21799	19522	19946	22755	19117	19100	17879	22443	17826	17459	19503	19444	19622	10676	20323	20996	18794	16980	20756	20094	20087	21101	15938	19501	18110	19092
266	2-Undecanone	169.16	1	4763.85	0.50802	C01875	C11H22O	-H(-)	100	266	169.16	KYWIYKKSMDLRDC-UHFFFAOYSA-N	Carbonyl compounds	3943	3792	3602	4681	3871	3589	2919	3230	3792	3401	3806	2726	3567	3876	3629	3281	3657	3893	3745	3001	4499	3952	3538	2809	4647	3751	3331	3029	3624	3722	3455	4424	3284	4038	3875	3865
267	4-Toluenesulfonamide	170.027	1	13615.5	0.890982	C14412	C7H9NO2S	-H(-)	100	267	170.027	LMYRWZFENFIFIT-UHFFFAOYSA-N	Benzenoids	1820	2744	1562	2825	6795	7702	6676	5660	5170	5332	5925	3966	5189	5136	5766	6316	5392	5562	6422	5066	5491	4299	5468	2830	5774	4660	4759	4252	5141	5352	5015	4350	3406	4609	4842	5001
268	2,3,4,5-Tetrahydrodipicolinate	170.046	1	29351.4	0.674484	C03972; C12108; C17356	C7H9NO4	-H(-)	100	268	170.046	CXMBCXQHOXUCEO-BYPYZUCNSA-N	Amino acids, peptides, and analogues	1048	1797	889	1906	7942	7708	7843	8164	7577	6226	7311	6640	7396	6875	7274	8007	8178	7772	7879	7134	7755	7153	8816	3225	7850	7574	7615	5760	9405	7320	7065	6476	4762	6506	7241	9320
269	Crotanecine	170.083	1	9635.1	0.766314	C10284; C11837	C8H13NO3	-H(-)	100	269	170.083	VMWCRDCGNVMCGJ-BWZBUEFSSA-N	Alkaloids and derivatives	1758	2561	1451	2588	5191	4935	5965	5153	4797	4660	5084	4912	4656	4103	5894	5850	4963	5201	5779	6639	5410	5823	5597	3214	6111	5595	5947	5153	5456	5847	6334	5364	4381	4557	4490	5606
270	Toluene-4-sulfonate	171.012	1	28599.4	0.829035	C06677	C7H8O3S	-H(-)	100	270	171.012	JOXIMZWYDAKGHI-UHFFFAOYSA-N	Benzenoids	3464	3934	3380	4445	15192	14721	17242	13798	14386	14783	15075	11579	13381	14635	13510	17868	15100	12252	15679	13808	14313	15444	14427	5804	13558	11033	11722	7439	13735	11882	14358	10370	7336	10598	13708	12638
271	3-Dehydroshikimate	171.03	1	19865.9	0.878311	C02637; C02652; C03063; C05600; C07478; C07479; C18306; C18318	C7H8O5	-H(-)	100	271	171.03	SLWWJZMPHJJOPH-PHDIDXHHSA-N	Carbonyl compounds	4234	4269	4308	5138	10584	10015	9394	9554	8297	8897	10181	8288	8566	9145	8982	9991	9630	9560	9574	8504	9413	9000	9959	4350	9775	9043	9023	6889	10136	8914	9504	8415	6149	8802	8777	9356
272	Menadione	171.045	1	18233.6	0.873302	C05377; C08446; C08774; C11427; C14091; C14101	C11H8O2	-H(-)	100	272	171.045	MJVAVZPDRWSRRC-UHFFFAOYSA-N	Benzenoids	2982	4470	2651	4646	7658	5484	7222	7621	6102	5626	7189	6274	6650	6872	6637	7237	6445	6365	5687	5614	6206	5490	8436	3124	8424	8794	7815	5880	8900	7597	8566	4870	4704	6417	5821	7250
273	Capillone	171.082	1	30938.4	0.913645	C16928	C12H12O	-H(-)	100	273	171.082	GHNBEBDYYSVNEK-XPQLPGEHSA-N	Benzenoids	4344	8540	4016	9071	8972	9271	15041	11632	11854	6875	9943	8102	10148	12885	8931	10867	11919	12593	11695	11072	9605	8166	13334	4198	17007	11333	18861	16799	15985	17953	12945	10667	9129	10893	10561	13131
274	9-Oxononanoic acid	171.103	1	103301	0.731128	C16322	C9H16O3	-H(-)	100	274	171.103	WLGDDELKYAWBBL-UHFFFAOYSA-N	Lipids and lipid-like molecules	74125	81800	63655	99303	62526	86232	60475	77262	60106	64505	76328	71295	61003	60516	78371	59833	61206	65603	60558	65601	67655	59833	81759	54615	82073	85056	111975	101495	104715	74342	67910	72685	68172	73242	49773	84711
275	Decanoic acid (FA10:0)	171.139	1	222493	-0.125111	C01571; C02904; C12289; C12292	C10H20O2	-H(-)	100	275	171.139	GHVNFZFCNZKVNT-UHFFFAOYSA-N	Lipids and lipid-like molecules	202057	183470	178534	198182	165879	157217	141007	149902	139713	134666	157981	132739	148697	167388	164602	145246	144476	147104	137871	130829	152661	152459	146920	73532	163580	157345	159592	116341	152164	148944	150458	158786	115202	160852	142749	148171
276	2-Quinolinecarboxylic acid	172.04	1	19457.9	0.621196	C06325; C06414; C14040; C19474	C10H7NO2	-H(-)	100	276	172.04	LOAUVZALPPNFOQ-UHFFFAOYSA-N	Organoheterocyclic compounds	2605	4133	2792	4893	8373	8189	9101	8115	6596	6905	7695	7438	7318	6872	9191	8566	7696	8498	10106	10838	8184	8467	8346	5303	9151	8411	8363	7250	7644	8130	9356	8694	6649	6793	6507	9078
277	Acetyl-Leu	172.098	1	146972	0.872047	C02710; C10173	C8H15NO3	-H(-)	100	277	172.098	WXNXCEHXYPACJF-ZETCQYMHSA-N	Amino acids, peptides, and analogues	107	205	104	172	8043	8173	9952	7858	7133	8410	11248	6234	9165	10772	7434	9752	9399	7891	7738	7010	9463	10900	9739	1237	12998	11562	10717	6419	13209	8480	9898	8088	5889	8950	8395	9518
278	Aconitate	173.009	1	99017.3	0.808128	C00417; C02341; C05422	C6H6O6	-H(-)	100	278	173.009	GTZCVFVGUGFEME-IWQZZHSRSA-N	Organic acids and derivatives	1066	2143	960	2763	14662	11592	13204	13684	12704	11159	16152	11545	12706	13745	12115	15926	14397	12986	9994	10368	14002	11856	14547	4580	13392	14826	13943	9808	16123	13561	13060	9018	8194	13145	9264	11917
279	Quinoxaline-2-carboxylic acid	173.035	1	22300.5	0.920414	C18624; C19560	C9H6N2O2	-H(-)	100	279	173.035	UPUZGXILYFKSGE-UHFFFAOYSA-N	Organoheterocyclic compounds	2294	1841	1719	2498	5951	6126	5798	6045	5608	4956	6283	4891	5780	5786	6008	5990	5922	5720	5372	4930	5751	5114	5950	2344	6414	5750	5599	3999	6567	6396	5498	4678	3716	5475	4902	5163
280	Shikimate	173.046	1	39661.3	0.819974	C00493; C04236; C16588; C18307; C18312	C7H10O5	-H(-)	100	280	173.046	JXOHGGNKMLTUBP-HSUXUTPPSA-N	Alcohols and polyols	5692	7613	5265	9899	16128	18812	16139	16490	15375	14350	17317	13172	14159	14452	16797	16582	16025	15447	17200	13714	14656	12724	15799	5682	14073	13125	14116	8721	14518	22086	13017	12690	7886	13660	14786	15079
281	Formimino-Glu	173.057	1	43430.9	0.960213	C00439; C16674	C6H10N2O4	-H(-)	100	281	173.057	NRXIKWMTVXPVEF-BYPYZUCNSA-N	Amino acids, peptides, and analogues	1947	2946	2269	3099	12565	20786	11955	11134	10975	11754	13085	8747	9699	9713	12221	11521	10850	12228	15979	8068	8250	7995	8899	3476	11489	8951	9491	6630	11480	13105	9831	8207	5895	10851	9428	8998
282	Indole-acetamide	173.074	1	50853.6	-0.238829	C02693; C02937; C13008	C10H10N2O	-H(-)	40	282	173.074	ZOAMBXDOGPRZLP-UHFFFAOYSA-N	Organoheterocyclic compounds	11925	10909	10673	10418	25000	28987	22719	22660	22142	22003	26029	19366	20576	23525	25082	22545	21747	20704	24178	19868	22339	19257	22086	7945	23490	22142	26965	19207	25361	28773	22586	22707	17921	22647	19791	20660
283	Suberic acid	173.082	1	125790	0.708534	C08278; C14570; C16658; C19402	C8H14O4	-H(-)	100	283	173.082	TYFQFVWCELRYAO-UHFFFAOYSA-N	Lipids and lipid-like molecules	47459	41343	36570	42056	48177	55595	45613	45309	44320	46908	52201	39378	41872	49283	59699	46269	43623	44620	42936	37739	44824	43474	46818	14953	51160	48451	72297	38063	50479	71257	53385	54300	34856	50892	39193	44652
284	Arginine	173.105	1	893660	0.565344	C00062; C00792; C02385	C6H14N4O2	-H(-)	100	284	173.105	ODKSFYDXXFIFQN-BYPYZUCNSA-N	Amino acids, peptides, and analogues	26221	9203	20714	11710	54545	72820	73549	55354	67250	63103	96146	52388	63674	58179	59800	66968	60736	48169	62818	53832	84321	58004	70947	25863	96203	86632	105429	108040	89473	87865	95815	125896	104519	106547	66322	55737
285	Acetyl-Asp	174.041	1	39076.7	0.904347	C01042; C01045; C05520	C6H9NO5	-H(-)	100	285	174.041	OTCCIMWXFLJLIA-BYPYZUCNSA-N	Amino acids, peptides, and analogues	808	144	860	144	7412	6399	6879	5996	6135	5755	5878	4223	5999	7843	11431	7607	7908	6046	8713	12756	8818	5841	12446	2195	6493	6060	18561	5540	21459	5770	9367	4701	3491	5936	5971	5854
286	Citrulline	174.089	1	279533	0.868817	C00327	C6H13N3O3	-H(-)	100	286	174.089	RHGKLRLOHDJJDR-BYPYZUCNSA-N	Amino acids, peptides, and analogues	4172	1432	3482	808	12558	10309	8507	9571	8650	8179	10408	7758	7634	9307	10413	9694	9099	10055	9095	7726	10704	8384	9844	3372	10090	7939	10537	7451	11186	10742	9307	9347	6557	8170	6322	7341
287	Hexuronic acid; Ascorbate	175.025	1	63672.9	0.832703	C00072; C02670; C03217; C03289; C03387; C04053; C04349; C04471; C06033; C06430; C06440; C19806; C20364	C6H8O6	-H(-)	100	287	175.025	CIWBSHSKHKDKBQ-JLAZNSOCSA-N	Organoheterocyclic compounds	1424	1199	1228	1175	14603	11552	13847	12527	7476	8803	10259	8701	7419	10005	19135	12566	14183	10692	15876	20024	14756	13084	14346	4885	13487	13627	13693	8353	18706	11502	11724	8116	5531	10213	7587	13183
288	1,3,8-Naphthalenertriol	175.04	1	35620	0.889317	C01173; C03081; C09268	C10H8O3	-H(-)	100	288	175.04	USWUTUCXLQBQCG-UHFFFAOYSA-N	Benzenoids	2374	2371	2287	2949	7806	6318	7370	6585	6823	6392	7286	6551	6249	6026	7848	7440	7145	6719	7397	8298	7175	7029	7488	3784	7487	7317	7421	6553	8464	7833	7496	6414	6237	6773	6353	7618
289	Allantoate	175.047	1	29324	0.891873	C00499	C4H8N4O4	-H(-)	100	289	175.047	NUCLJNSWZCHRKL-UHFFFAOYSA-N	Amino acids, peptides, and analogues	1539	1390	1544	1642	7137	7747	6622	5653	5854	5925	8180	4612	5465	6006	6653	7727	6017	5709	5676	6082	6839	5796	7263	2167	10953	8576	8790	7490	10231	10620	11904	10392	9023	10312	5367	5730
290	3-Propylmalate	175.061	1	35825.1	0.759681	C02123; C02504; C03328; C04411	C7H12O5	-H(-)	100	290	175.061	LOLHYFQEDPGSHZ-AKGZTFGVSA-N	Organic acids and derivatives	3072	6034	2868	7295	17066	22335	16276	15172	17149	16795	23461	11960	12196	14452	19506	18741	15914	17702	19472	14461	13038	11819	14537	3703	20203	16170	17954	10922	16049	18832	17976	13757	9931	17542	14788	13771
291	Ethyl cinnamate	175.078	1	41211.5	0.902721	C06359; C10389; C12299; C14083; C14102; C14111	C11H12O2	-H(-)	69	291	175.078	KBEBGUQPQBELIU-CMDGGOBGSA-N	Phenylpropanoids and polyketides	8365	10802	11045	13804	11635	14713	16234	14705	13324	11048	16916	14241	16171	25357	18027	16476	15788	19995	15452	8764	11237	10377	11350	4537	24120	20536	20906	16877	21664	17061	15677	14538	14250	16044	14084	15634
292	L-Cladinose	175.098	1	19519	0.887601	C11917; C18744	C8H16O4	-H(-)	100	292	175.098	AJSDVNKVGFVAQU-BIIVOSGPSA-N	Carbonyl compounds	4651	4723	5110	5310	6635	7051	6228	7019	5458	6245	7371	5178	6103	6975	8291	6137	6475	6091	6293	4970	5913	4419	5778	2530	8105	7656	8657	5850	6359	7360	6943	6767	5595	7732	5946	5794
293	4-Hydroxyaminoquinoline N-oxide; Hydroxy-methyl-Glu	176.055	1	20337.2	0.908913	C04050; C06034; C07899; C17576; C20844; C20845	C6H11NO5; C9H8N2O2	-H(-); -H(-) [+1]	30	293	176.055	XGXCMUKDRZHNCO-UHFFFAOYSA-N	Organoheterocyclic compounds	307	1068	273	1072	3205	2393	4364	3756	4427	2585	2518	2848	3793	2694	3171	5039	3970	3841	3536	3246	3235	3417	3277	1509	3817	3036	3204	2578	2664	3335	3929	3795	2690	3036	3872	4069
294	Anthopleurine	176.092	1	8181.14	0.844037	C16994	C7H15NO4	-H(-)	100	294	176.093	ZOPACRMLVDFSGJ-NTSWFWBYSA-N	Organic acids and derivatives	85	606	76	583	1181	797	1987	1736	2084	980	873	1172	1780	1053	1338	2578	1762	1630	1576	1402	1274	1475	1389	523	1338	1154	1247	960	599	1394	1608	1718	1100	1177	1806	1920
295	Phenmetrazine	176.108	1	4432.27	0.81125	C07432; C09991	C11H15NO	-H(-)	100	295	176.108	OOBHFESNSZDWIU-UHFFFAOYSA-N	Organoheterocyclic compounds	315	1103	413	1364	1559	1107	2276	1957	2514	1289	1183	1445	2150	1362	1628	3212	2168	2147	1844	1741	1294	1959	1573	699	1640	1385	1566	1260	1085	1898	2007	2146	1504	1532	2077	2145
296	Glucono-lactone	177.042	1	41276.1	0.928933	C00198; C00204; C00273; C00691; C01040; C01115; C01216; C02669; C02692; C02779; C03107; C03269; C03383; C03926; C05394; C05410; C06892; C16737; C17577; C19679; C20251; C20680	C6H10O6	-H(-)	72	296	177.042	PHOQVHQSTUBQQK-SQOUGZDYSA-N	Carbohydrates and carbohydrate conjugates	3195	14289	3184	14311	22917	24100	27214	25404	25854	19068	22104	19553	22798	23142	22562	26152	24720	23490	25245	19404	22123	22013	22751	9145	26129	22219	23841	17068	24958	24327	24894	23763	17164	24028	23056	23366
297	Vermelone	177.056	1	69931.7	0.897975	C01624; C02666; C10667; C14784; C20327; C20646	C10H10O3	-H(-)	100	297	177.056	AQTKGZASUQVMEJ-UHFFFAOYSA-N	Benzenoids	6947	23224	7437	25805	25784	24929	29641	26152	28766	23436	27395	24221	27669	33692	27999	29161	28925	32394	26933	22930	23961	25477	24826	13181	32117	27752	29567	23651	28257	26050	26610	27460	23604	27655	26855	28632
298	Methyleugenol	177.093	1	46380.6	0.368517	C10454; C10478; C14535; C14709; C17663; C17665; C17666; C17782	C11H14O2	-H(-)	100	298	177.093	ZYEMGPIYFIJGTP-UHFFFAOYSA-N	Benzenoids	15855	14643	14872	15866	18947	18370	19030	18716	18534	16132	20074	17837	19732	22359	20133	18067	18766	18882	18684	17881	18267	16903	17570	9327	20644	20145	19512	16487	20484	17091	18224	18574	15163	19049	17692	18141
299	Propofol	177.128	1	8035.19	0.804252	C07523; C14465	C12H18O	-H(-)	100	299	177.128	OLBCVFGFOZPWHH-UHFFFAOYSA-N	Benzenoids	2301	1931	2243	1955	3157	3691	3441	3968	3099	3153	3480	3649	3907	4477	3708	3557	3677	3234	3631	3646	3665	3703	3415	2780	3897	3779	4068	3249	4061	3926	4049	3491	3667	3712	3365	4114
300	3-(4-Hydroxyphenyl)pyruvate	179.035	1	106240	0.791546	C01179; C01197; C01405; C01481; C05350; C12623; C13400	C9H8O4	-H(-)	100	300	179.035	KKADPXVIOXHVKN-UHFFFAOYSA-N	Benzenoids	528	4029	458	3884	16739	12389	14246	14744	15923	14204	13021	13213	16042	12204	13471	15668	15036	14758	16204	14645	13040	13066	12562	7202	15105	14343	14290	11252	12351	14688	13119	12304	10816	11987	14816	14909
301	3-tert-Butyl-5-methylcatechol	179.109	1	76171.7	0.898357	C03929	C11H16O2	-H(-)	100	301	179.108	YKYXORJDSTUCTN-UHFFFAOYSA-N	Benzenoids	97	698	85	731	6641	5702	7904	7387	7639	5264	5599	5208	7132	7037	6686	7878	7579	7349	7614	6240	6426	6531	6915	1841	6217	6273	6239	3268	6275	6196	6424	6194	3370	6346	6533	6815
302	Tyrosine	180.066	1	821573	0.446075	C00082; C01536; C03290; C04368; C06420; C19579; C19712; C20807	C9H11NO3	-H(-)	100	302	180.066	OUYCCCASQSFEME-QMMMGPOBSA-N	Amino acids, peptides, and analogues	6776	45573	5775	22925	87254	86279	107427	83907	100465	78045	91169	76954	101914	94070	90589	99481	92624	89985	94810	91900	83475	84608	97609	37952	140164	137358	149275	102929	136410	177297	186363	180277	121997	175606	77145	81857
303	Saccharin sodium anhydrous	180.984	1	19069.7	0.76296	C12284	C7H4NO3S.	-H(-)	100	303	180.984	WINXNKPZLFISPD-UHFFFAOYSA-M	Organoheterocyclic compounds	9955	11414	10660	11347	12295	14856	17150	14819	14131	12028	14178	12509	12797	14366	12493	15265	13482	15076	14819	12023	12727	13125	14767	7277	15419	12758	13908	11539	16757	13347	14495	13973	10759	13904	12470	13740
304	2-Oxo-4-phosphonobutanoate	180.99	1	13189.1	0.789225	C17941	C4H7O6P	-H(-)	100	304	180.99	JDJXYEAWFIGKSA-UHFFFAOYSA-N	Organic acids and derivatives	7050	8584	7570	9658	10813	10594	10838	9924	10849	8889	11181	9774	9820	10503	11062	10087	10365	9483	10569	10438	10242	9627	11372	5153	10985	11156	11233	7993	11444	10368	11485	9032	7062	10752	9854	11478
305	Stipitatate	181.014	1	53385.4	0.714466	C01853; C06680; C12325; C14097	C8H6O5	-H(-)	100	305	181.014	ANEBWDNUQVPSJT-UHFFFAOYSA-N	Hydrocarbon derivatives	13343	9843	12222	11195	27809	23955	26418	25924	21752	23070	28212	21858	22611	23955	25507	30202	27694	23561	23771	21091	27169	23383	27538	10243	30283	26955	25172	19799	36552	25657	26394	19347	16244	24034	22404	27281
306	2,4-Dinitrotoluene	181.026	1	23541.5	0.765779	C11006; C11008; C14306; C19410; C19788	C7H6N2O4	-H(-)	100	306	181.026	RMBFBMJGBANMMK-UHFFFAOYSA-N	Benzenoids	7706	5755	7440	6509	9651	8792	9544	9777	7986	8366	9252	8371	9005	8695	8959	10318	9068	8944	9048	7789	9244	8495	9367	3947	10638	9523	8992	6392	11180	9704	9526	8381	5831	8668	8903	9620
307	Diisopropyl sulfate	181.056	1	32585.8	0.422657	C19230	C6H14O4S	-H(-)	24	307	181.056	HWBLTYHIEYOAOL-UHFFFAOYSA-N	Organic acids and derivatives	1273	2836	1096	3314	8924	8223	8985	8172	8404	7684	8727	7626	7435	8372	8828	9371	8669	9047	9469	8892	9432	9343	8666	4172	11160	9677	8701	6472	8170	8819	8952	8687	6264	8283	7693	8866
308	Dacarbazine	181.085	1	43093.2	0.484262	C06936	C6H10N6O	-H(-)	100	308	181.085	FDKXTQMXEQVLRF-ZHACJKMWSA-N	Organic acids and derivatives	4732	8453	4756	7221	13692	12394	14720	15006	15350	12048	12970	12924	14030	14946	13696	13922	14873	14014	14531	12942	12165	13056	13638	8832	13574	14161	14201	11967	14462	14793	13926	13257	10576	13096	11660	12502
309	Geranyl formate	181.124	1	13054.6	0.822628	C12294; C14113	C11H18O2	-H(-)	100	309	181.124	FQMZVFJYMPNUCT-YRNVUSSQSA-N	Lipids and lipid-like molecules	4307	2627	3346	2921	4996	5553	5139	5697	5877	4908	5674	5107	5923	5101	5328	5788	5267	5410	5417	6286	4671	5549	4833	3676	5452	6031	6251	4842	5515	6531	5228	5211	5364	5385	5583	5540
310	Saccharin	181.992	1	6700.03	0.811688	C12283	C7H5NO3S	-H(-)	100	310	181.992	CVHZOJJKTDOEJC-UHFFFAOYSA-N	Organoheterocyclic compounds	1873	2976	1884	2398	3929	4192	3813	3639	3221	3442	3782	3137	3906	3713	3577	4230	3491	3675	3761	3570	3579	3780	3819	2011	5053	4312	4266	3177	4767	4057	4474	4321	3170	3798	3105	3339
311	5-Nitrosalicylate	182.01	1	20012.7	0.496833	C19789	C7H5NO5	-H(-)	100	311	182.01	PPDRLQLKHRZIJC-UHFFFAOYSA-N	Benzenoids	13889	14742	11972	14661	11350	11666	12897	11577	11402	10076	11022	10640	11269	12023	11387	12781	11383	12275	12986	10161	11539	11165	11975	7073	12645	11556	12054	9311	13883	11168	12415	11479	9504	11984	10947	11444
312	4-Pyridoxate	182.046	1	33964.8	0.688503	C00847; C04447; C04773; C11466; C12026	C8H9NO4	-H(-)	100	312	182.046	HXACOUQIXZGNBF-UHFFFAOYSA-N	Organoheterocyclic compounds	2106	2516	2105	2676	9080	8479	9742	8982	8890	7652	9232	7678	9942	8983	9704	9836	10212	8778	9027	9103	9694	8792	9683	3524	9061	10961	10491	7128	10431	9922	10902	10187	7265	9380	8786	9432
313	4-Amino-2-hydroxylamino-6-nitrotoluene	182.058	1	20227.9	0.91687	C16403	C7H9N3O3	-H(-)	100	313	182.058	VQMWRUKXHJGSIE-UHFFFAOYSA-N	Benzenoids	793	1485	825	1379	5006	4653	5643	5015	4190	4273	4390	4232	4572	4555	5554	5451	5367	4855	5933	6587	4833	5717	5189	2302	5835	5378	5100	4252	5400	5361	6341	5042	3627	4476	4304	5223
314	L-Adrenaline	182.082	1	15023.5	0.784154	C00788; C05589; C11768; C17925	C9H13NO3	-H(-)	100	314	182.082	UCTWMZQNUQWSLP-VIFPVBQESA-N	Benzenoids	1141	2608	1285	2300	4132	4110	4674	4478	4255	3727	3793	3801	4334	4389	4520	4185	4600	4494	4488	3874	4125	4439	4651	1996	4656	4482	4537	3534	5113	4728	4985	4432	3571	4489	3961	4156
315	Tecostanine	182.155	1	1126.87	0.897157	C09989	C11H21NO	-H(-)	100	315	182.155	CRVXJVHSLVEDRI-UHFFFAOYSA-N	Organoheterocyclic compounds	425	772	460	283	690	510	628	700	476	625	549	427	606	572	739	807	655	631	609	754	598	580	509	507	845	533	757	738	744	875	688	635	752	544	472	483
316	7-Methyl-2-hydroxy-6-oxoocta-2,4-dienoate; Choline-P	183.066	1	34082.7	0.781562	C00588; C04535; C05594; C06582; C10765; C11456; C11588	C5H15NO4P; C9H12O4	-H(-); -H(-)	100	316	183.066	YHHSONZFOIEMCP-UHFFFAOYSA-O	Organic nitrogen compounds	5838	6570	5651	6979	14574	10650	9953	10134	9425	8854	9801	8424	9037	9945	14098	11656	11567	9980	9786	10176	9541	9486	11354	5014	10035	9626	9870	8104	10492	10862	10378	8797	7136	11207	8532	10197
317	5-exo-Hydroxy-1,2-campholide	183.103	1	46927.8	0.256004	C03843; C04718; C06066; C11405; C11419; C19079; C19084; C20324	C10H16O3	-H(-)	100	317	183.103	CLHVOQQIYBCJNZ-PRZNWYJVSA-N	Organoheterocyclic compounds	5060	13697	4159	15062	26231	22322	37371	24346	29940	23854	20937	18602	26432	21306	13647	33312	29334	21675	18193	15116	20942	21660	16949	13237	21925	22535	19868	18600	13892	21870	21314	15780	17193	19446	21451	19938
318	Citronellyl formate	183.139	1	35230.5	0.120299	C12295; C13823; C13910; C19420	C11H20O2	-H(-)	100	318	183.139	DZNVIZQPWLDQHI-UHFFFAOYSA-N	Lipids and lipid-like molecules	13630	15312	12282	15672	15357	15691	16346	14154	14496	13086	16728	13820	13868	14723	17240	15594	15466	14644	15869	15554	15093	14302	16437	9974	16640	17982	16359	16169	16218	16526	14960	13791	13763	13914	13415	16398
319	Dodecylaldehyde	183.176	1	5218.76	0.581472	C02278	C12H24O	-H(-)	100	319	183.176	HFJRKMMYBMWEAD-UHFFFAOYSA-N	Carbonyl compounds	3778	3780	3247	4000	3214	4145	3268	3643	3479	3147	3828	3375	3446	3544	3967	3771	3491	3561	3212	3079	3634	3517	3236	1948	3747	3237	3520	3134	3966	6878	2983	3427	2622	4042	3170	3872
320	Phosphoserine	184.002	1	123213	0.827394	C01005; C02532	C3H8NO6P	-H(-)	100	320	184.002	BZQFBWGGLXLEPQ-REOHCLBHSA-N	Amino acids, peptides, and analogues	155	38	131	41	11308	12717	12554	9539	9785	8358	10287	8798	7993	6439	8364	9787	10829	9847	9908	9208	9779	8725	8987	4307	6864	7184	5876	6003	5612	6685	5907	5352	4248	5089	8319	9269
321	cis-2-Carboxycyclohexyl-acetic acid	185.082	1	94896.1	-0.0211505	C14112	C9H14O4	-H(-)	100	321	185.082	GCGCKIUIBPEAQE-BQBZGAKWSA-N	Organic acids and derivatives	17399	26722	15859	28958	22250	25486	24666	24383	19926	20197	24611	20224	19071	23782	21841	19770	19576	23525	20391	18670	19993	17620	22592	8666	25414	24793	27186	20813	24410	28098	22675	21893	15892	20947	20199	23247
322	Undecanoic acid	185.155	1	81323.3	-0.184806	C17715	C11H22O2	-H(-)	100	322	185.155	ZDPHROOEEOARMN-UHFFFAOYSA-N	Lipids and lipid-like molecules	67393	62934	63482	64040	51925	54964	48606	50635	49250	47949	54465	46846	48258	55222	56546	51024	50862	53205	51412	45492	54210	51536	49767	27568	53800	54332	52531	40541	51553	53156	50773	57536	39631	56622	46096	50830
323	8-Amino-7-oxononanoate	186.114	1	25411.3	0.766283	C01092; C12029	C9H17NO3	-H(-)	100	323	186.114	GUAHPAJOXVYFON-UHFFFAOYSA-N	Lipids and lipid-like molecules	7218	12782	6095	8189	8599	9373	8109	8042	8274	7778	9374	7521	7955	9720	9905	7919	7176	7685	7735	9132	8001	7866	10210	3714	12220	11034	12251	8308	13590	13158	13377	10556	8436	13591	7369	7845
324	n-Decanohydroxamic acid	186.15	1	3785.74	0.882445	C12889	C10H21NO2	-H(-)	100	324	186.15	QZXOLBPUAUOQFB-UHFFFAOYSA-N	Organic oxygen compounds	1856	2710	1399	1967	1748	1859	1836	1792	2311	2153	1906	1502	1784	2315	2181	2009	2078	1751	1408	1884	2002	1979	2298	783	3119	2868	3077	3223	3555	3519	4429	4103	3069	3612	1514	2134
325	1-Hydroxy-2-naphthoate	187.039	1	32110.2	0.89728	C03203; C10387; C10398; C16212	C11H8O3	-H(-)	100	325	187.039	SJJCQDRGABAVBB-UHFFFAOYSA-N	Benzenoids	1188	6199	1216	1878	7938	8845	7677	6741	6511	6265	6179	5217	5874	6477	7301	9796	6573	6875	8222	6185	6204	5680	6285	3383	6648	5318	5075	4475	6388	5516	5498	5007	4281	5563	5834	5729
326	2-Oxosuberate	187.062	1	45501.9	0.762216	C16589	C8H12O5	-H(-)	100	326	187.062	HAGOOZVJLSSXGZ-UHFFFAOYSA-N	Organic acids and derivatives	8664	18789	7794	17532	18737	20272	19082	18128	17539	16076	18921	14716	15761	18137	20589	18556	16961	18354	19438	17274	17914	16755	19155	6749	19773	18705	18910	13004	16724	19618	19700	18038	12736	16968	15307	16842
327	Azelaic acid	187.098	1	152873	0.800157	C08261; C17878	C9H16O4	-H(-)	100	327	187.098	BDJRBEYXGGNYIS-UHFFFAOYSA-N	Lipids and lipid-like molecules	71202	121589	56784	111925	73456	87145	66187	91086	70005	72821	80054	63304	66201	71471	108066	68430	66152	72968	68463	68304	59298	57128	78646	31190	79891	82782	138653	73452	98275	123643	82765	87979	61413	85980	66111	87144
328	10-Hydroxydecanoic acid	187.134	1	23907.1	0.660664	C02774; C18067	C10H20O3	-H(-)	100	328	187.134	YJCJVMMDTBEITC-UHFFFAOYSA-N	Organic acids and derivatives	12475	15761	12673	15173	13467	15877	12727	14878	13727	12416	13294	11716	14769	14082	16423	13490	13878	12889	14452	11492	11723	10067	12214	5588	15779	14550	18417	11826	13368	18548	15351	15820	10836	14583	11957	13237
329	4-Hydroxy-2-quinolinecarboxylic acid	188.036	1	24463.3	0.572977	C01717; C02172; C14800; C14802; C16715; C18621	C10H7NO3	-H(-)	100	329	188.036	HCZHHEIFKROPDY-UHFFFAOYSA-N	Organoheterocyclic compounds	5197	4635	4694	4596	9980	10341	10331	8568	8343	8630	9331	7540	8151	8611	8788	11466	8438	8857	9928	8254	7935	7950	9826	4721	10236	8957	8441	8041	9168	9536	9383	8671	6774	7906	8425	8624
330	Acetyl-Glu	188.056	1	42087.6	0.853777	C00624; C03871; C12109	C7H11NO5	-H(-)	100	330	188.056	RFMMMVDNIPUKGG-YFKPBYRVSA-N	Amino acids, peptides, and analogues	801	409	634	323	9685	9997	7682	7664	7894	6649	9891	5724	7417	8010	7493	8210	7946	7677	7511	5840	7834	7192	8235	1942	8545	7644	8132	5695	9483	8377	8759	8724	5432	8269	8089	7199
331	3-Dehydroquinate	189.041	1	29403.2	0.778764	C00944; C04049; C05601; C06201	C7H10O6	-H(-)	100	331	189.041	WVMWZWGZRAXUBK-SYTVJDICSA-N	Organic acids and derivatives	5159	9412	4748	10885	10999	10578	10909	9928	9739	8290	9873	7794	9013	10845	10377	11497	10428	10016	9666	8451	9577	8709	10383	3856	10346	10223	10368	7545	11475	10859	10529	8884	6990	9860	9744	10065
332	7-Ethoxycoumarin	189.056	1	28435.2	0.888901	C11052; C14105; C15102; C17916	C11H10O3	-H(-)	100	332	189.056	LIFAQMGORKPVDH-UHFFFAOYSA-N	Phenylpropanoids and polyketides	3529	4012	3567	4224	7670	7212	7347	7399	7172	5993	7556	6287	6944	7449	6708	7371	6652	7226	6499	5721	6830	6078	6944	3271	8307	7146	7894	6679	7984	8290	8339	8021	6803	8103	6293	6333
333	(R)-3-((R)-3-Hydroxybutanoyloxy)butanoate	189.077	1	35519.7	0.875671	C04546	C8H14O5	-H(-)	100	333	189.077	RILHUWWTCSDPAN-PHDIDXHHSA-N	Organic acids and derivatives	3141	5758	2980	6133	13613	16153	13183	12031	13303	11476	15626	9646	11886	12256	11546	12993	12002	11865	11545	8846	12050	10572	12950	3762	20490	17625	21578	17648	19767	31658	30948	23359	23344	27890	9919	10553
334	Diaminopimelate	189.088	1	60901	0.73969	C00666; C00680	C7H14N2O4	-H(-)	100	334	189.088	GMKMEZVLHJARHF-WHFBIAKZSA-N	Amino acids, peptides, and analogues	390	2513	329	1621	11551	15695	10711	10537	11126	9142	12916	7408	10329	9643	8861	10629	9424	10072	9003	7590	11576	9007	10867	3503	20517	17071	20508	19676	18247	20044	21085	25246	21089	22773	8568	8312
335	5-Hydroxyindoleacetate	190.051	1	33538	0.597524	C05635; C06725; C16596	C10H9NO3	-H(-)	100	335	190.051	DUUGKQCEGZLZNO-UHFFFAOYSA-N	Organoheterocyclic compounds	3074	3161	2973	3692	11244	11972	12637	11063	10222	10098	12274	8668	10726	11054	10820	13229	11659	11735	12373	9327	12036	10648	11418	4313	14120	11632	12862	9364	13530	12989	13413	13709	8578	10933	11229	10887
336	Phendimetrazine	190.123	1	2326.92	0.903796	C07904; C10935; C10938	C12H17NO	-H(-)	100	336	190.123	MFOCDFTXLCYLKU-CMPLNLGQSA-N	Organoheterocyclic compounds	235	272	245	317	592	645	685	638	731	599	624	620	743	757	770	839	678	751	687	575	659	613	682	441	765	667	869	820	686	758	658	931	837	883	655	544
337	(Iso)Citrate	191.02	1	668785	0.339575	C00158; C00311; C00451; C00679; C02780; C03600; C03921; C04575; C04617; C12649	C6H8O7	-H(-)	69	337	191.02	KRKNYBCHXYNGOX-UHFFFAOYSA-N	Organic acids and derivatives	24822	182711	21609	246969	130789	139243	149726	131146	122556	113921	125251	81507	110971	113362	109566	211368	115125	130511	150625	103326	123244	108459	122757	52853	136884	100862	108484	68208	114791	115515	123391	99983	75005	123843	110295	105833
[truncated: 438 more rows]
[truncated: 58 more columns]

## Sheet: 3_Exudates_raw
Raw metabolite data for exudate samples												sample name: treatment_timepoint_replicate, values are relative peak heights
[truncated: 3,019 more rows]
[truncated: 61 more columns]

## Sheet: 4_ExudateTissues_raw
Raw metabolite data for tissue samples collected with exudates												sample name: treatment_timepoint_replicate, values are relative peak heights
[truncated: 3,019 more rows]

## Sheet: 5_Shoots_filtered
Metabolites with >2x higher abundance in shoot samples compared to blanks															sample name: treatment_timepoint_injection number_replicate, values are normalized peak heights
[truncated: 482 more rows]
[truncated: 51 more columns]

[truncated: 4 more sheets: 6_Roots_filtered, 7_Exudates_filtered, 8_ExudateTissues_filtered, 9_Anova]
