# Supplementary material for: Amino acid pathways are central for defense in Arabidopsis revealed by time-resolved, integrated multi-omics analysis
Source: Research Square preprint supplement (doi:10.21203/rs.3.rs-5659933/v1), 2025-01-06
Supplement: Supplementary file 2 [file 76b204d638fe283e8a6c2065.xlsx]

## Sheet: 1_RawCounts
Raw Counts of RNAseq experiment of mock- and elicitor (fep)-treated plants
gene_name	fep_1d.1	fep_1d.2	fep_1d.3	fep_1d.4	fep_4h.1	fep_4h.2	fep_4h.3	fep_4h.4	mock_1d.1	mock_1d.2	mock_1d.3	mock_1d.4	mock_4h.1	mock_4h.2	mock_4h.3	mock_4h.4
AT1G01010	461	583	656	624	642	562	395	194	350	307	200	368	282	397	331	345
AT1G01020	184	206	172	241	212	184	152	77	196	172	118	198	134	191	316	230
AT1G01030	43	58	46	85	64	73	58	29	62	72	38	48	110	183	276	79
AT1G01040	1161	1506	1285	1535	846	890	782	350	1333	1155	646	1209	707	1031	1299	1129
AT1G01046	13	32	9	13	14	13	18	3	23	20	8	22	6	17	19	22
AT1G01050	831	1183	1034	1128	685	705	578	370	1073	934	604	1078	724	962	1145	1302
AT1G01060	529	1082	599	730	75	105	62	55	714	555	318	761	220	229	221	181
AT1G01070	134	181	214	176	178	198	151	63	149	174	96	140	139	177	179	273
AT1G01073	0	0	0	0	0	0	0	0	0	0	0	0	0	0	0	0
AT1G01080	871	900	739	919	340	364	432	287	1110	998	639	976	425	498	888	941
AT1G01090	3419	3622	3381	3755	2614	2506	2402	1407	4296	3668	2525	3928	2945	3432	5107	4684
AT1G01100	3183	3103	3250	3576	3114	2345	1852	772	3725	3513	2072	3802	2371	3143	3533	3462
AT1G01110	103	93	75	138	157	128	87	43	176	145	82	178	98	129	194	163
AT1G01115	0	0	0	0	0	0	0	0	0	0	0	0	0	0	0	0
AT1G01120	1366	1446	1465	1413	863	977	922	497	1409	1296	1045	1493	1410	2311	2338	1719
AT1G01130	16	11	19	11	6	7	4	3	18	17	9	15	16	19	12	7
AT1G01140	677	813	890	1085	1144	1217	936	431	678	576	307	673	906	1144	1670	1400
AT1G01150	2	1	1	2	1	0	0	0	4	5	1	4	4	5	1	3
AT1G01160	599	654	606	693	722	676	624	235	637	623	361	594	490	605	1013	811
AT1G01170	572	704	620	647	414	449	493	219	557	435	229	516	385	477	894	1113
AT1G01180	180	194	227	218	379	373	316	143	222	213	115	217	198	239	353	410
AT1G01183	0	1	0	0	0	0	1	0	0	0	0	0	0	0	0	1
AT1G01190	148	100	266	165	36	36	14	12	160	171	120	227	123	213	135	155
AT1G01200	61	49	61	62	5	14	6	4	48	69	30	79	13	36	31	34
AT1G01210	140	219	180	209	106	86	60	16	183	151	84	160	87	123	155	144
AT1G01220	700	885	711	825	579	561	463	194	684	593	353	678	386	535	643	676
AT1G01225	48	66	56	59	26	22	28	11	86	74	41	71	45	70	56	64
AT1G01230	432	562	464	512	491	508	390	197	492	397	287	447	352	475	649	585
AT1G01240	555	553	541	562	947	927	971	296	499	388	198	414	762	860	1440	1359
AT1G01250	78	206	73	68	12	22	21	3	34	23	9	34	16	27	9	24
AT1G01260	405	509	457	546	498	435	354	165	500	450	265	458	283	409	485	446
AT1G01270	0	0	0	0	0	0	0	0	0	0	0	0	0	0	0	0
AT1G01280	0	0	0	0	1	0	0	0	0	0	0	0	0	0	0	0
AT1G01290	293	423	278	332	167	194	148	89	297	222	151	261	159	201	288	287
AT1G01300	1546	1507	1554	1709	518	401	355	298	1905	1712	1142	1967	697	847	1161	1118
AT1G01305	0	0	0	0	0	0	0	0	0	0	0	0	0	0	0	0
AT1G01310	0	2	2	2	0	2	1	1	0	0	0	3	1	1	1	0
AT1G01320	7011	7813	6416	7129	3291	4632	4190	1665	7703	6932	3816	7278	3281	4022	7685	6459
AT1G01340	502	756	828	698	720	870	740	335	534	500	273	481	351	383	304	367
AT1G01350	535	656	593	672	797	591	462	298	557	497	275	539	446	594	798	679
AT1G01355	3	4	4	1	0	2	2	0	2	3	2	2	2	3	4	3
AT1G01360	215	350	265	306	223	174	152	99	321	244	141	276	191	267	257	275
AT1G01370	93	87	88	95	52	39	36	18	97	99	47	123	56	57	77	83
AT1G01380	42	57	29	39	29	20	19	5	64	50	33	51	15	28	26	37
AT1G01390	50	92	51	69	6	27	24	6	110	85	52	105	17	16	19	31
AT1G01400	0	0	0	0	0	0	0	0	0	0	0	1	0	0	0	0
AT1G01410	0	0	0	0	0	0	0	0	0	0	0	0	0	0	0	0
AT1G01420	327	522	311	383	73	139	124	42	206	175	73	196	88	115	172	158
AT1G01430	1046	1073	945	1032	474	595	516	284	1116	994	681	1135	437	660	1056	1102
AT1G01440	439	587	461	589	540	559	499	250	588	427	271	501	401	538	674	662
AT1G01448	257	358	283	362	370	368	284	220	375	338	172	285	295	299	566	585
AT1G01450	0	0	0	0	0	0	0	0	0	0	0	1	0	0	0	0
AT1G01453	12	9	11	7	5	3	2	2	35	16	10	27	17	20	12	27
AT1G01460	0	0	1	0	2	0	0	0	0	0	0	0	0	0	0	0
AT1G01470	2542	4005	2309	1813	2947	3125	4257	1361	982	928	515	1015	6218	10674	9219	4977
AT1G01471	0	0	0	0	0	0	0	0	0	0	0	0	0	0	0	0
AT1G01480	198	489	334	302	1233	827	642	413	90	88	57	91	104	196	99	127
AT1G01490	1405	1743	1642	1804	2811	2438	1849	1372	1522	1429	779	1501	1001	1259	1887	1801
AT1G01500	386	518	454	395	381	327	258	137	302	291	160	329	197	338	463	393
AT1G01510	955	1197	983	1021	894	819	657	362	1159	1017	604	1068	648	912	1254	1158
AT1G01520	52	201	53	80	13	8	9	7	28	21	14	38	27	19	9	10
AT1G01530	1	0	0	2	0	0	0	0	0	0	0	0	0	0	0	1
AT1G01540	1312	1644	1187	1494	668	697	595	320	1695	1354	805	1507	767	1020	1574	1512
AT1G01550	3328	4154	3905	3990	4085	4043	3359	2335	3029	2775	1526	2989	2340	3134	3945	4118
AT1G01560	38	98	130	122	230	115	104	50	46	28	20	34	57	177	58	90
AT1G01570	32	95	55	80	34	26	40	24	42	42	22	45	57	72	88	64
AT1G01580	954	1186	778	498	35	92	122	99	3495	4910	2668	4807	362	415	252	156
AT1G01590	3	7	0	8	0	0	0	0	1	1	0	2	0	0	0	0
AT1G01600	301	341	225	278	65	48	47	19	314	156	111	275	108	167	165	130
AT1G01610	1878	2056	2050	1654	596	821	628	380	1487	1246	862	1431	1005	1175	1381	1298
AT1G01620	4464	3908	4308	4395	6118	6987	7846	1717	6571	5284	3052	6100	12302	13078	21210	18698
AT1G01630	1555	1747	1486	1571	749	805	655	288	1168	1090	627	1306	705	1049	1066	1260
AT1G01640	351	448	488	422	163	174	156	125	322	290	195	301	259	314	312	394
AT1G01650	958	1299	1083	1077	1757	1538	1361	755	628	570	330	612	810	1205	1612	1362
AT1G01660	26	46	51	32	59	40	22	25	40	36	22	61	39	60	65	66
AT1G01670	32	63	48	47	30	40	43	39	39	18	19	30	33	42	54	43
AT1G01680	31	58	77	67	7	42	74	12	42	22	9	15	51	63	29	46
AT1G01690	156	127	112	163	84	65	53	20	170	119	78	144	96	104	126	122
AT1G01695	6	7	6	9	6	4	3	0	5	7	2	6	4	1	1	7
AT1G01700	27	22	31	28	8	7	14	4	22	27	16	24	2	18	11	18
AT1G01710	876	1315	990	1117	855	896	843	333	917	729	430	791	752	965	1375	1195
AT1G01720	575	789	720	748	2288	1205	690	521	387	315	206	343	1254	1718	1008	1047
AT1G01725	88	126	72	93	77	98	70	36	54	60	32	64	67	68	112	106
AT1G01730	384	489	447	517	599	566	420	145	370	285	146	326	353	497	547	504
AT1G01740	219	241	194	205	161	127	127	68	138	143	90	163	78	100	135	117
AT1G01750	128	98	120	136	94	51	22	50	281	239	165	353	247	329	211	311
AT1G01760	80	97	111	109	126	97	91	40	100	88	50	92	83	104	169	117
AT1G01770	471	697	587	583	1301	1540	1368	444	439	409	221	410	649	675	1151	1016
AT1G01780	270	300	287	285	464	581	426	195	345	298	205	332	357	357	481	488
AT1G01790	2723	3940	2261	3484	1482	1742	1792	857	3726	2988	1882	3756	1534	2191	3677	2690
AT1G01800	1232	1719	1396	1419	1174	1035	871	689	1053	884	507	1009	633	922	1104	1245
AT1G01810	12	14	9	13	9	2	3	1	6	10	2	8	8	4	12	13
AT1G01820	1012	1341	1253	1172	2092	2102	1544	870	989	862	463	906	741	921	1441	1323
AT1G01830	482	694	552	579	420	357	399	152	397	383	166	372	366	405	515	557
AT1G01840	18	12	14	22	13	10	12	8	28	17	6	28	10	13	18	19
AT1G01860	201	226	191	193	146	124	143	62	216	177	108	191	119	123	199	166
AT1G01870	0	0	0	0	0	0	0	0	0	0	0	0	0	0	0	0
AT1G01880	29	34	38	42	24	21	26	15	49	37	16	27	33	39	58	63
AT1G01890	0	0	0	0	0	0	0	0	0	0	0	0	0	0	0	0
AT1G01900	372	480	347	371	89	183	209	53	253	180	122	283	168	269	385	235
AT1G01910	821	922	887	981	1134	1058	759	362	970	822	505	985	618	906	1201	1013
AT1G01920	396	515	344	429	425	321	238	158	536	500	251	555	338	375	502	434
AT1G01930	307	433	315	404	398	387	323	149	301	273	181	312	311	355	496	477
AT1G01940	339	367	306	329	248	243	168	89	282	279	137	305	187	197	261	260
AT1G01950	560	689	592	658	346	364	269	144	605	522	300	634	313	427	543	550
AT1G01960	2906	3562	3175	3253	2773	2645	2115	1267	3207	2869	1685	3152	2269	2848	3977	3876
AT1G01970	389	395	346	404	169	191	175	71	383	393	277	366	163	249	386	346
AT1G01980	0	0	0	0	1	0	0	0	0	0	0	0	1	0	0	0
AT1G01990	486	630	468	471	561	513	382	310	494	433	263	507	315	376	719	604
AT1G02000	258	302	262	300	235	213	182	97	358	299	188	352	212	298	332	306
AT1G02010	221	290	261	285	149	135	121	50	251	200	97	198	111	149	233	233
AT1G02020	336	407	339	371	284	385	318	159	321	269	185	263	259	330	545	450
AT1G02030	24	23	19	30	35	37	18	28	31	16	8	21	16	15	5	15
AT1G02040	1	3	1	1	3	0	2	0	4	2	0	1	3	5	1	0
AT1G02050	109	152	148	181	138	104	120	46	170	136	98	158	129	132	180	212
AT1G02060	186	226	172	210	180	170	136	72	228	207	108	248	152	169	283	287
AT1G02065	51	52	37	37	35	23	28	13	80	39	28	48	27	36	79	33
AT1G02070	5	2	2	1	2	0	3	0	7	2	3	5	3	3	4	8
AT1G02074	1	0	1	0	0	0	2	0	0	0	0	0	0	0	1	1
AT1G02080	3584	4712	4153	4429	3437	3656	2894	1470	4024	3310	1985	3619	2692	3431	4676	4369
AT1G02090	717	790	692	763	602	449	391	227	713	603	369	801	481	587	735	646
AT1G02100	791	1117	938	921	924	961	762	314	936	835	484	868	677	778	1064	1152
AT1G02110	557	693	499	584	584	493	474	259	737	668	339	675	502	570	965	882
AT1G02120	2116	2971	2413	2700	3590	3077	2382	1097	2000	1758	949	1800	1441	1866	2328	2664
AT1G02130	703	867	736	865	614	621	532	240	790	676	401	836	530	725	855	933
AT1G02136	0	0	0	0	0	0	0	0	0	0	0	0	0	0	0	0
AT1G02140	1566	1803	1648	1647	1130	1021	788	296	1618	1405	801	1555	873	1270	1508	1521
AT1G02145	465	589	537	565	387	420	349	159	531	456	280	471	348	402	600	614
AT1G02150	1303	1367	1241	1408	816	890	791	430	1666	1527	821	1517	915	1148	1828	1664
AT1G02160	225	249	229	240	192	174	149	109	226	191	100	206	141	190	296	301
AT1G02170	714	895	874	928	1686	1381	1097	675	710	577	415	678	589	831	1033	1075
AT1G02180	57	54	44	62	27	27	27	13	73	67	35	65	29	40	95	65
AT1G02190	3	20	1	13	7	1	14	1	7	4	9	10	1	34	24	3
AT1G02205	2174	2979	1192	1269	879	731	1884	424	1304	651	607	949	1408	2529	3559	1619
AT1G02210	0	0	0	0	0	0	0	0	0	0	0	0	0	0	0	0
AT1G02220	718	1194	1358	1197	870	753	628	302	277	267	153	264	256	430	289	384
AT1G02228.1	0	0	0	0	0	0	0	0	0	0	0	0	0	0	0	0
AT1G02230	86	145	133	136	143	85	37	41	41	19	19	20	34	48	41	79
AT1G02250	4	0	4	1	3	5	1	0	0	2	2	2	3	0	0	0
AT1G02260	303	437	376	387	322	342	266	165	368	315	154	304	253	307	398	526
AT1G02270	657	858	688	700	518	440	327	188	498	423	292	438	287	476	564	534
AT1G02280	623	659	566	744	514	496	542	238	882	792	455	757	645	694	1278	1162
AT1G02290	246	349	283	288	120	161	128	64	245	232	123	221	133	193	257	232
AT1G02300	445	563	437	492	195	274	295	74	320	281	149	303	181	174	383	434
AT1G02305	2134	2962	2477	2494	1737	2267	2253	628	1627	1321	725	1535	1574	1839	2649	3421
AT1G02310	58	101	105	74	73	58	74	25	38	22	21	46	59	74	49	76
AT1G02320	1	1	1	0	1	1	0	0	1	0	0	0	0	1	0	0
AT1G02330	618	780	643	661	739	646	476	230	623	495	284	595	361	546	648	662
AT1G02335	581	587	633	415	183	240	217	169	460	348	234	406	266	316	438	462
AT1G02340	25	54	40	60	59	71	50	37	64	40	31	57	63	60	90	73
AT1G02350	21	27	24	16	13	9	6	6	38	25	20	34	11	17	29	38
AT1G02360	1074	1423	1674	1351	4066	3691	2853	1821	1089	1153	550	1142	756	968	726	924
AT1G02370	191	188	173	196	97	76	39	31	213	181	116	197	69	119	124	145
AT1G02380	87	83	53	70	80	37	52	25	85	100	51	71	36	76	58	88
AT1G02390	104	181	98	61	43	46	42	20	102	106	60	85	49	76	64	70
AT1G02391	0	0	0	0	0	0	0	0	0	0	0	0	0	0	0	0
AT1G02400	134	148	203	210	407	216	160	118	106	121	63	127	306	554	339	211
AT1G02405	11	22	10	12	6	7	2	4	3	2	2	6	7	8	7	3
AT1G02410	464	572	509	550	517	478	359	251	475	361	235	467	309	389	466	491
AT1G02420	108	134	85	99	67	88	56	23	94	84	60	109	58	102	119	125
AT1G02430	39	30	40	55	44	46	37	24	29	41	25	36	30	31	25	37
AT1G02440	17	17	25	32	19	10	10	10	12	16	10	12	11	13	13	7
AT1G02450	11	57	49	84	41	10	6	9	20	14	6	9	6	14	7	24
AT1G02460	157	225	208	200	274	321	215	134	112	94	73	133	225	327	237	214
AT1G02470	18	21	54	28	31	51	44	15	14	14	4	12	12	36	22	37
AT1G02475	811	1120	806	980	661	961	818	420	614	509	341	567	424	630	1135	974
AT1G02480	0	0	0	0	0	0	0	0	0	0	0	0	0	0	0	0
AT1G02490	3	4	0	1	0	0	0	1	3	1	0	1	2	0	3	2
AT1G02500	14075	18345	17640	16146	15434	13053	10068	5240	15580	16411	8337	16969	8575	12276	14656	15793
AT1G02510	0	0	0	0	0	0	0	0	0	0	0	0	0	0	0	0
AT1G02520	587	905	895	765	473	461	346	234	640	666	359	678	240	347	253	396
AT1G02530	13	18	21	20	8	1	1	1	16	23	15	16	5	9	5	12
AT1G02540	0	0	0	0	0	0	0	0	0	0	0	0	0	0	0	0
AT1G02550	0	0	0	0	0	0	0	0	0	0	0	0	0	0	0	0
AT1G02560	3134	3651	3255	3635	2569	2989	3401	1462	3487	2954	1756	3053	2577	3328	6382	5265
AT1G02570	19	9	14	14	199	197	182	79	24	24	23	34	29	29	19	51
AT1G02575	0	1	2	1	7	3	0	4	12	11	9	15	10	18	6	16
AT1G02580	1	16	9	4	0	9	2	1	9	2	1	3	6	0	0	1
AT1G02590	0	0	0	0	0	0	0	0	0	0	0	0	0	0	1	0
AT1G02600	0	0	0	0	0	0	0	0	0	0	0	0	0	0	0	0
AT1G02610	55	77	74	65	345	385	389	171	77	72	47	58	232	212	557	476
AT1G02620	0	0	0	1	1	3	4	3	1	2	3	0	7	0	13	8
AT1G02630	0	0	0	0	0	2	1	0	1	0	0	1	2	1	4	5
AT1G02640	224	219	241	266	346	509	349	180	478	333	198	442	1297	1148	2911	2307
AT1G02650	12	8	9	17	25	10	9	8	24	24	7	15	14	10	30	36
AT1G02660	125	149	172	162	916	873	987	320	193	153	90	138	559	550	1099	765
AT1G02670	38	34	25	38	24	35	28	18	38	35	14	39	37	36	57	40
AT1G02680	169	224	205	246	245	215	214	111	200	172	96	165	158	222	297	270
AT1G02681	0	0	3	1	1	1	2	1	0	0	0	0	0	2	0	3
AT1G02690	534	544	532	674	427	311	238	183	805	704	463	728	447	557	656	621
AT1G02700	3	10	5	6	3	0	2	1	5	3	1	4	4	3	11	7
AT1G02710	0	0	0	0	0	0	0	0	0	0	0	0	0	0	0	0
AT1G02720	209	208	196	225	137	123	120	89	288	255	171	300	199	194	263	272
AT1G02730	1313	1332	1350	1598	447	470	421	255	1924	1431	931	1654	742	985	1217	1293
AT1G02740	212	219	230	202	159	162	120	45	194	145	101	146	125	180	259	245
AT1G02750	203	313	242	252	320	335	266	115	281	220	154	214	200	208	296	338
AT1G02760	0	0	0	0	0	0	0	0	0	0	0	0	0	0	0	0
AT1G02770	9	6	6	3	2	2	2	1	4	1	1	4	1	1	4	7
AT1G02780	13679	13157	14208	14763	12234	8846	6751	3298	16001	14601	7340	16066	9239	12576	13751	13674
AT1G02790	0	0	0	0	0	0	0	0	0	0	0	0	1	0	0	0
AT1G02800	74	81	24	85	14	10	39	4	74	69	37	74	22	25	60	26
AT1G02810	500	384	551	572	350	263	178	203	484	488	356	554	290	378	224	434
AT1G02813	0	1	2	1	3	0	1	0	4	0	0	4	1	7	2	1
AT1G02816	170	313	222	232	492	434	419	208	188	173	102	153	252	326	508	410
AT1G02820	95	246	99	100	33	18	15	12	66	53	41	50	33	24	38	32
AT1G02830	0	0	0	0	0	0	0	0	0	1	0	0	0	0	0	0
AT1G02840	2151	2794	2381	2554	3105	2605	2403	1173	2780	2460	1320	2530	2176	2477	3854	3411
AT1G02850	742	901	1180	1236	2032	1684	1007	513	224	209	120	255	515	951	635	1115
AT1G02860	291	394	396	406	694	820	830	380	365	342	186	374	417	491	717	685
AT1G02870	374	347	351	381	357	281	207	111	436	409	241	438	267	339	383	354
AT1G02880	528	609	560	559	562	484	381	260	387	330	231	398	272	429	460	465
AT1G02890	2558	3506	2987	3196	3433	3583	2904	1468	3019	2560	1463	2829	1954	2462	3496	3230
AT1G02900	632	692	789	726	667	667	541	401	774	851	487	986	619	864	694	1006
AT1G02910	716	876	706	883	674	625	528	288	820	700	421	668	493	645	1066	815
AT1G02920	7581	14051	18305	12337	37212	25965	15290	8060	1400	1960	983	1490	1572	3164	1559	2005
AT1G02930	10398	20897	19264	14718	75566	51675	26227	20064	2149	1850	1066	2114	2307	5935	2804	2401
AT1G02940	31	65	29	29	23	7	7	5	20	11	11	19	2	6	10	9
AT1G02950	140	232	163	204	234	245	205	116	292	238	147	297	185	223	291	317
AT1G02952	0	0	0	0	1	0	0	0	0	0	1	1	1	0	2	2
AT1G02960	389	537	373	508	406	339	338	204	455	385	204	386	298	380	613	586
AT1G02965	0	0	0	0	0	1	0	0	0	1	0	0	1	0	0	0
AT1G02970	94	60	92	103	43	35	24	21	94	84	55	82	40	63	51	56
AT1G02980	7	14	20	20	13	9	3	8	10	2	2	1	3	6	2	5
AT1G02990	746	950	731	884	779	733	622	329	674	613	350	659	497	685	992	811
AT1G03000	600	712	695	763	532	550	495	231	706	578	391	575	478	575	942	855
AT1G03010	34	35	61	46	51	52	30	34	64	70	59	91	99	103	104	141
AT1G03020	11	14	15	14	2	3	5	0	8	6	6	6	3	7	8	9
AT1G03022	0	0	0	0	0	0	0	0	0	0	0	0	0	0	0	0
AT1G03030	364	570	483	548	473	474	408	174	362	322	183	366	338	413	488	483
AT1G03040	895	1205	1075	1174	1116	974	682	389	845	707	438	772	581	850	885	866
AT1G03050	0	0	0	0	0	0	0	0	0	0	0	0	0	0	0	0
AT1G03055	84	90	69	99	17	18	22	9	98	71	52	93	21	31	45	49
AT1G03060	2291	3102	2915	3015	3199	2925	2233	1376	2576	2317	1233	2529	1804	2334	2634	2873
AT1G03070	22	79	37	25	9	14	11	10	32	24	25	40	18	37	39	32
AT1G03080	3917	5509	4496	4835	5995	6069	4845	2677	3641	3152	1849	3650	3791	5440	5694	5103
AT1G03090	690	1102	906	935	7041	8453	8435	3060	760	568	310	656	4539	3133	10568	7071
AT1G03100	97	81	61	75	40	27	21	15	77	62	37	90	42	64	48	47
AT1G03103	0	0	0	0	2	0	0	0	0	0	0	0	0	0	0	0
AT1G03106	0	0	1	2	4	6	4	1	1	1	0	4	1	2	3	3
AT1G03110	283	288	289	321	210	126	110	52	326	326	180	391	157	249	199	225
AT1G03120	6	9	8	11	3	6	7	3	8	12	5	8	14	14	21	4
AT1G03130	25584	21867	21262	24641	13873	18306	21290	11967	29175	24344	13914	24212	12081	11734	33576	42658
AT1G03140	865	1109	980	1093	1684	1456	1212	700	987	849	493	945	1025	1107	1661	1652
AT1G03150	231	288	268	301	260	209	229	107	331	262	158	283	177	206	325	387
AT1G03160	1069	1262	1035	1218	618	750	838	370	1077	944	627	903	581	741	1099	1051
AT1G03170	1	14	1	9	9	1	3	3	11	1	7	15	4	3	11	4
AT1G03180	75	73	56	70	67	54	40	19	57	60	46	49	47	53	74	53
AT1G03190	252	392	329	331	268	262	202	120	351	268	167	317	183	257	367	285
AT1G03200	92	120	100	92	105	76	77	41	83	80	41	63	77	79	125	104
AT1G03210	354	409	456	555	484	449	342	175	478	422	213	472	367	488	496	632
AT1G03220	17423	28447	21022	17728	52144	50703	47927	37895	14373	12309	7542	14216	13244	19377	14994	16608
AT1G03230	1028	1008	1190	1149	4196	3147	2630	2115	1047	1042	653	1045	1324	1660	1404	1643
AT1G03240	2	1	1	2	1	0	1	0	6	3	3	1	2	1	3	3
AT1G03250	565	673	608	630	510	499	393	236	567	491	270	499	337	509	616	575
AT1G03260	175	181	182	198	227	180	152	84	197	181	106	175	173	183	232	209
AT1G03270	95	108	83	89	61	47	65	17	112	110	49	128	55	76	105	92
AT1G03280	907	1074	945	977	951	922	774	408	948	799	421	797	661	772	1276	1067
AT1G03290	831	1463	1106	1366	1343	1376	1232	618	801	686	345	681	700	1075	1243	1411
AT1G03300	119	101	95	96	14	28	28	7	119	103	72	133	31	58	87	129
AT1G03310	1919	2721	1690	1962	217	344	386	104	1337	1053	728	1168	281	468	694	734
AT1G03320	4	3	1	2	0	1	1	2	5	2	0	7	0	2	1	3
AT1G03330	452	486	462	525	464	393	363	116	500	450	220	490	346	465	586	553
AT1G03340	93	120	89	78	37	54	34	14	60	52	26	35	50	55	80	89
AT1G03350	971	1287	994	1107	1049	961	767	427	1131	879	544	1025	634	926	1088	1082
AT1G03360	262	256	210	283	209	145	102	56	342	312	172	329	148	173	197	211
AT1G03365	540	706	561	630	454	461	386	278	589	563	327	552	356	441	628	617
AT1G03370	988	1437	1176	1301	2484	1834	1371	817	956	842	454	729	881	1355	1259	1503
AT1G03380	1265	1869	1567	1697	1898	2178	2015	833	1361	1133	709	1236	1240	1493	2144	2477
AT1G03390	0	0	0	0	0	0	0	0	0	0	0	0	1	0	2	0
AT1G03400	344	581	437	556	228	288	373	163	398	295	138	288	237	281	472	659
AT1G03410	219	243	201	200	256	179	165	77	194	236	131	199	148	210	374	320
AT1G03420.1	284	278	278	343	138	114	101	58	402	387	291	422	240	276	325	339
AT1G03430	358	448	426	492	402	371	316	155	351	333	203	354	289	374	513	549
AT1G03440	299	317	274	388	76	117	125	66	465	362	263	383	138	127	268	279
AT1G03445	8	5	5	8	9	2	5	1	6	6	4	3	0	10	9	5
AT1G03457	158	211	221	222	164	172	152	85	322	307	156	293	221	249	356	370
AT1G03470	117	161	90	157	91	118	93	54	133	95	74	100	93	90	181	197
AT1G03475	2352	2659	2270	2914	1877	1975	1782	1196	2819	2505	1518	2484	1492	2113	3383	3254
AT1G03490	0	0	0	0	0	0	0	0	0	0	0	0	0	0	0	0
AT1G03495	340	690	239	332	48	97	66	34	124	78	55	135	28	63	74	47
AT1G03502	1	6	2	2	0	0	1	1	1	0	3	1	4	2	6	1
AT1G03506	7	10	7	8	4	5	2	5	11	2	7	7	6	4	19	10
AT1G03510	31	15	36	32	23	24	22	8	34	33	27	24	16	24	25	21
AT1G03515	0	0	0	0	0	0	0	0	0	0	0	0	0	0	0	0
AT1G03520	177	272	210	214	209	227	264	117	189	194	109	187	233	264	469	419
AT1G03530	531	523	492	599	299	190	139	150	641	601	358	640	236	350	365	407
AT1G03540	52	63	38	47	38	23	24	17	62	49	32	58	39	44	66	35
AT1G03550	278	472	332	389	259	302	298	171	306	238	143	304	235	310	431	493
AT1G03545	27	28	31	38	19	27	9	10	29	31	22	33	22	26	28	30
AT1G03560	243	289	245	279	227	161	138	69	279	211	140	243	159	221	332	269
AT1G03570	0	0	0	0	0	0	0	0	0	0	0	0	0	0	0	0
AT1G03580	11	15	12	15	33	39	31	16	15	18	8	10	32	41	67	46
AT1G03590	442	570	481	658	848	674	523	365	593	462	270	552	448	644	684	679
AT1G03600	5411	5235	4863	5081	1574	1803	3117	1861	6568	6410	4198	6521	3223	3323	8880	8786
AT1G03610	510	703	578	615	1555	1084	1012	736	812	726	490	739	750	935	1491	1411
AT1G03620	55	44	48	58	31	38	18	10	74	58	32	59	56	62	119	87
AT1G03630	3654	3567	2844	3485	515	568	848	322	4046	3184	1663	3622	1005	1241	1908	1791
AT1G03640	0	0	0	0	0	0	0	0	0	0	0	0	0	0	0	0
AT1G03650	25	33	28	31	42	40	25	11	41	29	9	42	26	32	34	39
AT1G03660	14	7	14	18	18	29	27	13	13	15	8	21	13	16	14	23
AT1G03670	0	0	1	0	0	0	1	0	0	0	0	0	0	1	1	1
AT1G03680	3351	3769	3347	3593	1517	1859	2372	1181	3466	2943	1911	3103	1953	2511	4855	4655
AT1G03687	208	300	250	277	173	163	125	66	272	268	130	240	160	241	282	301
AT1G03700	7	11	18	12	10	8	1	3	27	13	10	32	18	15	20	26
AT1G03710	3	5	3	3	6	0	2	0	4	2	2	4	0	3	3	9
AT1G03720	0	0	0	1	0	0	0	0	0	0	1	0	0	0	0	0
AT1G03730	109	134	147	133	137	88	115	96	99	103	84	114	66	82	109	107
AT1G03740	1818	2608	2281	2289	4461	3957	2768	1903	1618	1363	727	1377	1199	1567	1942	2080
AT1G03743	0	0	1	0	0	1	0	0	0	0	0	0	0	0	0	0
AT1G03746	0	0	0	0	0	0	0	0	0	0	0	0	0	0	0	1
AT1G03750	186	274	243	267	318	300	229	131	213	149	92	198	218	231	395	305
AT1G03760	241	329	240	276	307	251	190	116	298	285	147	257	181	280	324	302
AT1G03770	214	227	214	222	264	253	197	110	238	196	122	217	170	225	237	239
AT1G03780	375	364	362	401	223	197	167	113	485	390	238	402	264	301	442	384
AT1G03790	8	23	21	22	46	48	71	16	5	4	4	3	13	8	5	25
AT1G03800	20	18	22	28	26	18	9	8	9	8	8	10	8	9	15	16
AT1G03810	0	0	0	0	0	0	0	0	0	0	0	0	0	0	0	0
AT1G03820	980	793	1245	1029	134	173	373	124	615	660	455	781	399	1134	844	626
AT1G03830	379	417	352	433	183	153	144	87	405	361	196	380	225	269	311	297
AT1G03840	150	118	120	166	133	87	57	38	181	160	103	200	114	125	114	154
AT1G03850	237	361	448	339	675	706	514	362	299	211	124	262	438	563	481	615
AT1G03860	1154	1283	1176	1262	1200	1025	678	334	1337	1124	682	1436	852	1232	1395	1285
AT1G03870	1077	710	954	1145	638	507	375	366	2821	2731	1706	3302	1462	1921	1226	2445
AT1G03880	0	1	0	0	1	0	0	0	0	0	0	1	0	0	3	0
AT1G03890	0	0	0	0	0	0	0	0	0	0	0	0	0	0	0	0
AT1G03900	1711	2244	1937	2004	2737	2320	1901	1079	1718	1463	825	1731	1371	1823	2235	2469
AT1G03905	154	193	179	198	379	308	262	136	120	114	59	122	108	142	110	110
AT1G03910	1324	1806	1432	1548	1847	1531	1250	687	1709	1429	716	1550	1203	1548	1904	1836
AT1G03920	99	86	121	102	55	67	43	35	110	75	64	115	94	91	124	145
AT1G03930	864	910	853	801	691	718	663	309	864	799	451	828	577	636	1136	1165
AT1G03935	20	22	14	13	15	10	13	5	17	20	5	14	14	8	21	30
AT1G03940	287	688	214	313	10	24	14	5	163	71	52	152	19	46	56	11
AT1G03950	303	347	381	350	393	399	354	177	261	216	140	277	261	317	442	438
AT1G03960	315	401	337	362	279	268	237	141	255	239	173	235	207	270	383	349
AT1G03970	440	667	536	514	605	478	384	214	478	390	206	396	337	415	514	568
AT1G03980	30	34	39	36	24	21	13	12	39	49	24	42	12	21	21	20
AT1G03982	0	0	2	0	0	0	0	0	0	1	0	0	0	0	0	0
AT1G03990	5	10	5	10	3	5	3	0	14	9	5	4	5	17	9	5
AT1G04000	208	308	247	327	237	224	210	128	239	208	107	223	187	180	273	223
AT1G04010	260	291	302	345	184	113	108	45	261	212	150	263	164	192	259	236
AT1G04020	267	256	256	312	91	84	71	55	331	265	226	329	142	172	178	245
AT1G04030	252	320	230	295	191	145	129	82	255	221	131	255	195	198	225	312
AT1G04040	5591	6049	5987	5677	2144	1790	1153	992	7195	6192	3528	7513	2183	3010	2418	4054
AT1G04050	98	116	123	117	64	46	31	24	131	96	69	103	74	88	109	99
AT1G04070	91	122	105	110	90	80	62	29	105	101	55	110	61	98	101	91
AT1G04080	2298	2756	2311	2574	2034	1982	1705	839	2816	2390	1369	2580	1549	2197	3055	2586
AT1G04090	12	15	16	19	14	20	20	12	29	18	6	29	20	19	21	19
AT1G04100	132	171	128	178	310	295	296	127	121	119	71	129	84	97	129	154
AT1G04110	79	79	49	91	31	37	49	23	159	90	46	98	53	55	94	83
AT1G04120	3262	4393	4181	4543	4602	4388	2887	1568	3784	3403	2157	3708	2176	3201	3179	3273
AT1G04130	236	359	259	268	153	148	106	50	238	212	90	215	150	202	179	208
AT1G04140	2128	2726	2402	2593	2370	2402	1968	818	2255	2021	1195	2218	1720	2163	3291	3144
AT1G04150	5	8	10	10	23	6	5	10	20	19	15	16	10	11	13	14
AT1G04160	333	355	239	370	97	102	94	52	413	317	230	413	208	234	258	239
AT1G04170	2063	2038	2241	2389	1452	1251	911	409	2602	2207	1328	2521	1140	1609	1782	1866
AT1G04171	0	0	0	0	0	0	0	0	0	0	0	0	0	0	0	0
AT1G04180	95	120	108	112	37	19	13	22	124	136	78	110	47	74	64	135
AT1G04190	671	747	693	734	383	304	223	142	725	612	399	715	333	442	505	562
AT1G04200	711	928	841	950	927	813	622	386	888	801	451	820	589	770	720	752
AT1G04210	1351	1562	1392	1583	1452	1239	980	601	1675	1355	816	1504	1078	1419	1586	1437
AT1G04220	670	872	829	662	289	355	407	239	605	548	426	577	754	1047	934	753
AT1G04230	227	337	257	276	226	231	163	113	278	222	103	253	148	169	271	257
AT1G04240	417	519	344	377	17	16	47	12	523	432	277	415	185	212	371	420
AT1G04250	722	788	757	981	337	265	174	103	1418	1166	570	1415	667	821	701	938
AT1G04260	230	284	268	260	339	229	265	147	239	210	117	230	200	263	318	329
AT1G04270	5346	5021	5475	5859	4331	3173	2421	1304	6519	5889	3498	6719	3481	4805	4696	4908
AT1G04280	873	913	1210	1040	1202	1062	848	420	980	805	477	1010	734	869	1181	1389
AT1G04290	227	292	245	291	158	111	104	69	216	180	120	244	136	172	210	216
AT1G04295	13	12	12	11	7	5	8	8	17	9	10	20	7	11	10	19
AT1G04300	2167	2972	2377	2686	3719	3182	2820	1547	2789	2242	1247	2354	2221	2608	3736	3671
AT1G04310	146	226	211	170	882	611	518	269	164	171	87	188	274	392	414	364
AT1G04320	0	0	0	0	0	0	0	0	0	0	0	0	0	0	0	0
AT1G04330	19	14	18	18	10	10	7	7	13	10	8	18	4	2	6	6
AT1G04340	282	379	362	434	306	261	180	147	416	360	219	406	229	367	371	395
AT1G04350	915	1412	958	1146	219	263	350	105	852	653	433	809	258	266	543	604
AT1G04360	150	119	143	169	180	161	118	94	182	186	110	227	157	171	182	217
AT1G04370	32	49	58	54	590	290	299	95	4	6	7	3	2	14	8	5
AT1G04380	10	4	9	7	6	2	9	0	2	3	6	4	5	10	3	4
AT1G04390	277	381	275	298	237	240	224	113	314	212	143	258	165	236	355	299
AT1G04400	2668	2704	3311	2835	5214	5503	4653	1909	2831	2280	1321	2467	3443	4225	6386	5826
AT1G04410	13421	15931	16656	16213	15402	15979	11830	5980	14854	13027	7651	16006	12637	17086	21100	22359
AT1G04420	1234	1177	1035	1247	800	748	769	288	1407	1325	731	1278	839	1075	1856	1573
AT1G04425	56	75	69	78	37	31	33	21	88	86	40	74	55	66	81	76
AT1G04430	2550	2647	2263	2604	1660	1566	1288	766	3096	2648	1790	3152	1608	2068	2370	2397
AT1G04440	1695	2160	2202	2213	3206	3572	3149	1486	1889	1563	884	1700	2001	2578	3443	3279
AT1G04445	5	7	6	7	33	16	9	9	3	7	3	4	9	17	12	20
AT1G04450	0	0	0	0	0	0	0	0	0	0	0	0	0	0	0	0
AT1G04457	0	0	0	1	1	0	0	0	0	0	0	1	0	0	0	0
AT1G04470	0	2	0	2	1	0	0	0	0	0	0	0	0	0	0	1
AT1G04480	1723	1967	1816	2143	1915	1379	968	962	2388	2222	1270	2458	1248	1872	1968	1917
AT1G04490	52	51	50	60	21	19	14	7	40	34	19	37	18	21	9	17
AT1G04500	7	6	4	19	11	12	23	8	8	0	1	5	18	26	24	14
AT1G04501	0	0	0	0	0	0	0	0	0	0	0	0	0	0	0	0
AT1G04510	1151	1373	1236	1392	1062	896	744	486	1386	1196	715	1285	718	1039	1380	1302
AT1G04520	293	273	207	326	76	53	38	56	377	307	263	416	138	176	155	176
AT1G04530	870	1161	994	1579	812	822	551	334	1408	1182	657	1353	599	919	869	979
AT1G04540	17	17	8	12	11	6	8	8	12	11	4	28	3	7	1	6
AT1G04550	428	566	443	527	92	140	132	54	546	488	276	520	172	224	234	297
AT1G04555	148	185	148	156	163	148	130	97	120	106	57	134	77	123	161	186
AT1G04560	0	1	0	1	1	1	7	0	0	0	0	0	2	0	2	5
AT1G04570	72	139	71	88	24	16	18	2	34	40	27	32	24	24	27	21
AT1G04580	6	11	44	15	19	15	18	2	4	4	2	5	4	8	1	8
AT1G04590	444	510	431	462	298	224	213	101	499	397	212	409	288	309	443	391
AT1G04600	24	23	41	45	52	31	23	24	17	26	16	26	29	54	50	61
AT1G04610	34	13	31	35	83	65	46	40	86	78	44	89	79	100	90	102
AT1G04620	181	210	149	214	166	182	215	77	232	196	115	184	203	231	473	344
AT1G04625	24	24	28	34	22	23	21	27	31	22	26	29	12	31	33	40
AT1G04630	584	654	560	680	572	489	426	361	696	597	343	655	476	656	818	802
AT1G04635	30	46	32	36	28	17	12	4	45	18	14	22	17	21	23	27
AT1G04640	319	357	310	429	203	202	231	126	370	331	195	400	214	249	427	437
AT1G04645	0	0	1	1	0	0	0	0	0	0	0	0	0	0	0	1
AT1G04650	94	110	103	82	46	34	19	17	78	66	43	102	38	52	64	54
AT1G04660	10	18	4	7	0	0	0	0	13	4	8	10	2	2	9	5
AT1G04670	2	0	1	0	0	0	0	0	0	1	0	0	0	0	0	1
AT1G04680	2214	1924	1937	2081	822	752	1506	403	2672	2348	1454	2613	1963	3652	3657	2216
AT1G04684	0	0	0	0	0	0	0	0	0	0	0	0	0	0	0	0
AT1G04690	1824	2322	2047	2190	1791	1689	1295	600	1820	1527	906	1724	1322	2058	2264	2357
AT1G04700	79	73	68	93	108	79	41	37	146	112	59	146	127	174	142	169
AT1G04710	470	598	478	437	216	178	175	88	341	340	205	353	193	317	376	346
AT1G04720	0	0	0	0	0	0	0	0	0	0	0	0	0	0	0	0
AT1G04730	205	209	216	235	154	118	95	52	290	235	124	239	131	169	179	186
AT1G04750	1460	1729	1616	1688	1835	1487	1159	625	1420	1327	727	1472	964	1412	1700	1732
AT1G04760	68	53	49	59	16	20	14	9	76	66	44	66	37	45	45	47
AT1G04770	762	963	716	915	147	76	88	29	796	603	392	780	79	132	101	181
AT1G04778	23	20	21	20	3	1	1	2	33	13	9	12	13	10	16	23
AT1G04780	1356	1762	1703	1695	2534	2241	1674	903	1373	1225	730	1255	1163	1757	2019	1838
AT1G04790	596	732	579	707	668	618	562	256	684	624	321	602	498	582	813	778
AT1G04800	1270	1344	681	1428	1008	1034	841	288	2238	1620	922	1707	920	973	1546	1585
AT1G04810	1571	1909	1809	1862	1627	1567	1312	541	1824	1643	820	1703	1234	1737	1944	2027
AT1G04820	8339	7486	7571	8712	3025	2361	1987	1631	11083	9162	5798	10807	4858	6649	6204	7292
AT1G04830	433	676	506	459	437	463	487	199	502	404	215	428	369	449	634	557
AT1G04840	30	24	18	31	23	21	13	9	41	24	19	34	18	27	30	28
AT1G04850	2344	2820	2516	2620	2631	2352	1820	1284	2419	2075	1174	2355	1641	2202	2716	2759
AT1G04860	926	1173	1047	1128	1073	931	709	425	951	934	565	1027	678	799	1218	1163
AT1G04870	707	762	746	806	692	465	414	240	901	810	434	845	462	655	576	743
AT1G04880	2	6	3	7	5	6	3	3	8	7	4	4	6	5	7	9
AT1G04890	0	0	0	0	0	0	0	0	0	0	0	0	1	0	0	0
AT1G04900	328	289	255	295	180	148	67	56	355	313	180	385	165	221	229	259
AT1G04910	766	927	777	901	676	688	486	288	762	638	419	760	503	682	822	872
AT1G04920	48	75	53	74	39	52	44	19	72	48	36	57	38	57	79	69
AT1G04930	87	140	105	124	142	122	105	52	92	84	57	120	69	93	132	97
AT1G04945	806	884	794	827	404	398	360	207	927	768	518	815	412	556	812	734
AT1G04940	627	674	611	668	290	308	300	147	775	623	429	660	344	466	694	605
AT1G04950	577	678	549	604	494	521	457	257	627	513	302	558	375	468	752	746
AT1G04960	457	589	612	596	855	822	706	341	533	416	224	486	433	542	732	719
AT1G04970	618	971	903	943	1003	1209	1061	531	669	550	316	621	619	832	1191	1176
AT1G04980	422	445	577	691	920	775	403	349	434	302	199	473	248	512	310	371
AT1G04985	641	820	674	677	896	751	664	291	715	594	357	575	505	639	920	908
AT1G04990	534	685	679	713	898	616	449	294	415	346	228	387	471	812	815	773
AT1G05000	250	273	322	341	175	148	98	42	377	304	214	362	114	172	143	221
AT1G05010	3006	3647	3732	4680	13933	8664	4936	4944	2714	2248	1261	2788	2812	5242	6629	4883
AT1G05020	12	8	8	17	38	22	6	14	25	15	11	22	35	34	24	32
AT1G05030	301	436	278	381	198	238	195	113	335	243	145	263	184	247	346	350
AT1G05040	0	0	0	0	1	0	0	0	0	0	0	1	0	0	0	0
AT1G05055	189	190	196	231	139	134	116	46	200	178	120	230	121	142	180	201
AT1G05060	407	634	492	457	450	383	282	224	290	246	159	307	200	264	350	393
AT1G05061	12	5	5	10	16	12	11	1	4	10	1	7	11	17	19	11
AT1G05065	25	26	27	17	6	9	6	3	22	19	11	12	5	4	14	9
AT1G05070	255	378	301	327	227	216	181	88	316	266	107	281	202	220	319	347
AT1G05080	0	0	0	0	0	0	0	0	0	0	0	0	0	0	0	0
AT1G05085	0	0	0	1	0	2	1	0	0	0	0	0	0	0	0	0
AT1G05090	42	54	66	62	46	48	57	31	68	60	29	57	54	72	65	84
AT1G05100	30	32	32	27	255	93	53	27	18	9	6	25	155	320	146	121
AT1G05120	725	928	820	860	786	764	624	286	810	665	415	721	581	810	942	924
AT1G05135	326	274	547	498	667	392	507	394	716	730	468	660	735	877	1180	1335
AT1G05136	1	0	0	0	0	1	0	1	0	0	0	0	0	0	0	0
AT1G05140	849	1009	854	900	392	602	576	265	847	778	467	759	427	525	1024	913
AT1G05150	960	1187	930	1139	766	808	670	374	1277	1038	717	1191	744	1011	1293	1367
AT1G05160	230	269	202	286	216	201	181	104	320	237	143	273	194	225	284	324
AT1G05170	480	817	468	604	332	263	174	139	321	317	155	352	180	303	302	317
AT1G05180	818	1015	898	1001	1025	875	722	319	808	665	405	728	549	780	946	982
AT1G05190	3824	3855	3124	4131	2387	2388	2985	1127	5948	5442	2568	5211	3115	3311	7362	5958
AT1G05200	981	1125	994	1238	648	698	530	243	997	855	490	989	382	516	954	851
AT1G05205	273	342	316	350	245	210	175	82	318	292	133	326	200	264	290	337
AT1G05210	92	82	85	95	77	45	39	23	144	99	56	117	92	95	86	100
AT1G05220	35	36	41	32	51	38	31	13	41	55	23	53	45	47	66	66
AT1G05230	377	464	373	401	248	302	239	137	418	321	191	366	207	262	548	378
AT1G05240	0	0	0	0	0	0	0	0	0	0	0	0	0	0	0	0
AT1G05250	0	0	1	0	0	0	0	0	0	0	0	0	0	0	0	0
AT1G05260	2420	2599	3166	2498	1067	911	641	570	2404	2398	1654	2752	1731	2340	1638	2948
AT1G05270	758	1110	924	987	1126	994	849	494	907	795	427	879	667	831	1137	1067
AT1G05280	74	58	59	66	38	32	23	18	103	110	71	109	55	58	40	47
AT1G05290	0	0	0	0	0	0	0	0	0	0	0	0	0	0	0	0
AT1G05291	0	0	0	0	0	0	0	0	0	0	0	0	0	0	0	0
AT1G05300	154	152	297	288	285	286	122	139	108	132	73	127	134	182	181	212
AT1G05310	112	113	121	88	15	53	35	6	119	74	57	100	66	98	97	125
AT1G05320	735	968	738	806	457	563	525	314	830	670	348	769	476	589	742	749
AT1G05330	0	3	0	2	2	1	0	1	0	0	2	0	0	0	1	0
AT1G05340	101	186	163	106	587	511	562	280	95	89	43	98	335	463	476	394
AT1G05350	527	579	601	639	682	574	380	251	593	518	275	605	378	592	648	615
AT1G05360	227	318	256	329	172	175	172	71	291	218	176	293	177	277	310	249
AT1G05370	75	94	89	96	23	17	16	23	97	71	47	82	31	27	36	49
AT1G05380	1117	1369	1195	1234	1398	1331	1010	524	1206	1084	659	1084	964	1156	1557	1476
AT1G05385	219	245	210	261	62	62	73	49	303	254	135	252	87	88	175	203
AT1G05390	0	0	0	0	0	0	0	0	0	0	0	0	0	0	0	0
AT1G05400	19	25	31	30	32	22	19	9	22	15	15	19	8	22	15	31
AT1G05410	319	409	373	389	391	396	349	134	440	367	211	352	325	340	597	502
AT1G05420	21	22	18	33	6	8	7	6	37	36	21	25	18	16	17	27
AT1G05430	382	518	459	468	339	380	320	214	440	413	213	413	297	395	592	512
AT1G05440	42	41	44	56	10	15	13	13	55	64	38	58	30	50	42	50
AT1G05450	21	27	22	19	24	26	16	15	24	14	14	12	10	12	21	33
AT1G05460	390	479	386	430	300	242	208	138	473	373	241	409	261	339	433	432
AT1G05470	270	300	307	352	161	192	170	84	393	338	196	364	196	215	359	348
AT1G05490	43	24	27	24	18	16	11	5	33	26	19	31	21	20	16	20
AT1G05500	1173	1285	1192	1323	981	887	645	386	1203	987	649	1230	728	1004	1172	1212
AT1G05510	0	0	0	0	1	1	1	0	0	0	0	0	2	3	0	0
AT1G05520	1371	1600	1403	1551	1252	1193	880	554	1532	1272	842	1362	898	1177	1371	1381
AT1G05530	31	20	20	42	8	7	0	1	90	93	55	82	61	63	60	60
AT1G05540	71	69	27	67	7	16	11	5	85	82	45	65	26	30	38	28
AT1G05550	5	4	6	9	0	0	0	0	10	5	3	5	4	0	5	5
AT1G05560	534	402	812	1068	1204	1522	865	582	428	465	291	442	931	1715	1221	1122
AT1G05562	222	286	239	233	94	105	139	65	263	227	132	224	141	126	279	274
AT1G05570	1833	2215	2840	2880	1428	2014	1345	722	2994	2647	1564	2799	2322	2556	2635	4168
AT1G05575	25	43	37	32	173	119	73	72	12	25	26	20	37	61	50	54
AT1G05577	6	10	12	6	1	4	1	3	12	10	11	9	4	12	2	5
AT1G05580	0	0	0	0	0	0	0	0	0	0	0	0	1	0	0	0
AT1G05590	336	364	294	354	133	124	103	67	344	306	207	366	164	219	267	261
AT1G05600	103	149	107	137	79	70	70	38	99	119	78	132	71	78	147	140
AT1G05610	12	12	4	11	8	22	13	3	23	19	9	14	17	17	22	13
AT1G05615	0	0	0	0	0	0	0	0	0	0	0	0	0	1	0	0
AT1G05620	541	534	535	603	555	537	470	263	636	544	378	708	473	680	678	667
AT1G05630	565	741	433	579	178	159	144	82	535	411	232	532	194	294	362	415
AT1G05640	70	96	84	88	44	40	36	17	86	66	33	84	41	48	66	78
AT1G05650	38	58	62	46	21	20	7	9	16	16	4	15	7	25	11	36
AT1G05660	70	46	74	95	39	22	19	13	99	116	66	127	95	119	64	130
AT1G05670	186	228	193	203	204	134	120	61	198	179	101	200	115	170	197	204
AT1G05675	4	13	25	39	591	193	125	178	3	1	1	2	42	80	36	30
AT1G05680	87	57	188	150	267	121	84	84	27	31	43	23	139	231	103	85
AT1G05690	74	116	76	103	37	52	54	21	75	50	29	76	68	70	91	66
AT1G05700	416	667	695	641	412	381	234	222	436	458	245	492	149	217	83	158
AT1G05710	321	327	368	396	191	157	118	51	262	234	147	272	146	162	172	205
AT1G05720	405	447	422	493	366	361	294	159	398	384	228	448	255	409	471	542
AT1G05730	34	32	45	28	34	18	12	12	40	33	20	44	9	19	23	23
AT1G05740	0	2	1	1	1	1	0	1	1	0	0	0	0	2	0	0
AT1G05750	83	86	77	107	85	62	66	30	78	69	35	69	64	85	124	133
AT1G05760	64	99	82	84	111	132	91	76	115	66	47	109	86	123	139	132
AT1G05770	16	16	17	15	42	43	36	15	26	22	18	26	25	25	35	22
AT1G05780	78	77	86	105	116	90	59	39	91	94	58	97	59	95	118	110
AT1G05785	147	157	123	163	169	129	95	53	111	124	83	120	96	129	167	160
AT1G05790	459	652	561	555	602	597	522	239	474	354	220	377	406	490	811	753
AT1G05800	2	0	0	0	10	8	7	3	0	0	0	0	2	2	3	4
AT1G05805	500	484	615	610	744	688	573	315	598	538	287	443	537	651	1040	1016
AT1G05810	102	97	104	109	100	96	63	51	180	181	93	181	138	171	204	214
AT1G05820	48	58	31	66	54	68	64	33	60	50	20	55	39	46	56	62
AT1G05830	973	1294	1020	1193	1132	1084	857	474	1197	1034	605	1116	915	1137	1640	1465
AT1G05835	53	90	59	108	77	60	61	37	120	73	31	83	70	50	160	117
AT1G05840	494	735	585	618	831	920	877	405	659	522	341	596	642	726	1090	1216
AT1G05850	9746	11445	9039	9683	2888	2760	2811	1123	11496	9748	5722	11200	4746	6050	8663	8792
AT1G05860	226	295	216	271	170	192	149	63	241	203	132	206	141	164	247	235
AT1G05870	611	995	635	820	224	209	222	108	602	502	262	556	313	395	411	436
AT1G05880	71	117	144	95	59	120	168	75	67	48	37	69	59	95	50	66
AT1G05890	1607	2401	1887	2006	2903	2834	2550	1015	1767	1418	865	1529	1650	2099	3336	3153
AT1G05894	12	21	16	20	27	14	12	5	12	13	9	23	14	30	7	14
AT1G05900	284	368	310	376	174	185	172	85	260	234	145	276	168	191	329	298
AT1G05910	976	1068	1022	1003	714	671	409	240	934	800	518	851	487	695	766	808
AT1G05920	0	0	0	0	0	0	0	0	0	0	0	0	1	0	0	0
AT1G05925	0	0	0	0	0	0	0	0	0	0	0	0	0	0	0	0
AT1G05930	0	1	0	0	0	0	0	0	0	0	0	0	0	0	1	0
AT1G05940	754	1028	963	939	525	578	570	327	771	654	408	686	447	625	799	850
AT1G05950	85	118	108	141	36	27	42	18	136	120	68	118	77	66	91	81
AT1G05960	1446	1766	1521	1712	2142	1911	1642	851	1545	1244	819	1422	1366	1779	2316	2178
AT1G05970	82	116	76	91	94	80	89	28	104	76	29	83	79	83	167	132
AT1G05980	0	0	0	0	0	0	0	0	0	0	0	0	0	0	0	0
AT1G05990	10	7	5	4	3	5	0	2	30	14	12	27	12	11	7	14
AT1G06000	1125	1210	998	1213	443	426	364	184	1231	978	650	1177	354	636	597	512
AT1G06002	111	123	154	145	174	131	124	64	153	105	58	138	152	181	345	182
AT1G06010	146	204	146	191	213	129	138	58	177	158	85	151	127	169	251	230
AT1G06020	7	16	7	10	9	13	6	6	1	5	3	4	12	10	15	13
AT1G06030	11	7	6	9	12	15	10	6	3	1	3	8	4	4	2	3
AT1G06040	4029	5112	4190	4326	1854	2117	2215	1227	4263	3698	2405	4045	2007	2381	4042	3671
AT1G06050	111	149	135	137	216	178	163	66	124	98	57	131	86	102	152	157
AT1G06060	383	435	437	467	539	444	397	299	409	355	240	380	363	442	594	617
AT1G06070	384	547	442	514	480	431	362	239	493	399	283	440	280	343	506	483
AT1G06080	91	106	77	96	40	34	34	19	154	181	90	144	74	113	89	134
AT1G06090	185	143	190	134	75	145	73	43	330	317	200	421	271	326	297	454
AT1G06100	111	98	68	95	7	10	17	8	104	56	35	93	22	64	99	76
AT1G06110	659	1037	802	859	647	749	744	333	734	630	350	641	677	851	1236	1269
AT1G06120	18	10	8	25	11	18	11	11	79	79	44	123	92	109	68	120
AT1G06130	610	913	711	719	756	609	554	223	586	460	291	483	398	570	710	741
AT1G06135	0	2	2	3	13	4	7	3	1	1	1	0	0	1	3	0
AT1G06137	2	8	4	1	4	2	0	2	0	0	0	0	0	0	0	0
AT1G06140	15	21	22	26	30	27	20	4	22	20	11	21	14	22	20	24
AT1G06150	1135	1368	1245	1334	1336	1311	1016	441	993	931	576	992	724	1010	1342	1350
AT1G06149	1088	1309	1187	1254	1287	1259	982	404	928	875	543	938	684	952	1259	1281
AT1G06148	8	4	4	1	20	8	3	4	9	3	4	2	4	11	6	12
AT1G06160	347	327	319	240	888	757	489	217	82	74	48	55	60	126	136	208
AT1G06170	12	12	8	13	5	4	5	1	22	18	12	19	5	8	11	11
AT1G06180	267	374	265	300	950	652	411	311	185	144	94	154	175	239	251	199
AT1G06190	1036	877	808	824	594	558	540	256	1239	1010	603	970	567	779	1186	1028
AT1G06200	967	1230	957	1069	925	864	689	330	1009	826	477	913	577	800	1150	1111
AT1G06210	804	1065	856	925	866	759	650	319	704	571	345	737	506	777	885	755
AT1G06220	1919	2104	2009	2054	1219	1209	1009	408	2232	1949	1141	2104	1114	1532	1837	1778
AT1G06225	1	6	2	1	71	98	82	32	0	2	2	1	24	21	31	27
AT1G06230	1639	2057	1838	1994	1986	2031	1690	965	1836	1567	923	1704	1417	1618	2443	2202
AT1G06240	258	345	264	315	174	150	130	98	287	278	164	250	134	162	229	237
AT1G06250	0	0	0	1	1	0	0	0	1	2	2	2	0	0	4	2
AT1G06265	75	108	84	97	58	51	62	20	86	76	42	73	56	60	105	108
AT1G06260	0	0	0	0	0	0	0	0	0	0	0	0	0	0	0	0
AT1G06270	110	124	114	149	61	46	51	29	99	86	56	77	67	71	72	72
AT1G06280	0	0	0	0	0	0	0	0	0	0	0	0	0	0	0	0
AT1G06290	1654	1810	1916	1844	2805	2825	2186	1423	1692	1387	875	1791	1574	1995	2462	2346
AT1G06310	28	13	13	26	41	26	16	21	64	46	38	58	40	49	27	43
AT1G06320	6	6	9	8	19	5	4	6	13	13	17	19	12	19	5	24
AT1G06330	9	1	7	7	6	6	4	2	20	5	7	13	18	26	23	18
AT1G06340	1	1	1	0	0	0	0	0	0	0	0	1	0	0	1	1
AT1G06350	77	45	51	44	6	4	7	3	62	40	21	21	26	52	53	82
AT1G06360	667	545	356	479	35	57	120	39	742	577	292	629	232	237	426	316
AT1G06370	72	113	78	87	89	65	106	52	104	59	46	89	83	63	154	115
AT1G06380	171	165	193	187	113	100	67	69	212	171	97	196	97	152	125	142
AT1G06390	1065	1362	1251	1398	1694	1350	966	592	1276	1117	630	1132	947	1146	1628	1642
AT1G06400	975	1140	1111	1179	1266	1253	1100	558	1174	959	545	1025	912	1166	1501	1760
AT1G06410	2702	3323	3128	3344	3156	3005	2330	1037	3427	2833	1813	3103	2323	3090	4091	3920
AT1G06420	28	44	27	26	13	21	10	6	49	54	18	41	26	31	46	44
AT1G06430	2700	4606	2940	3748	1813	1938	2709	787	2199	1465	928	1844	1765	2412	4050	3161
AT1G06440	52	27	31	36	21	27	13	12	40	29	20	23	16	28	30	29
AT1G06450	87	73	74	69	47	66	33	16	70	51	22	53	33	64	81	69
AT1G06460	1699	2273	1589	1487	745	1205	1255	442	1017	822	563	796	767	877	1969	2178
AT1G06470	577	571	578	606	346	338	284	121	548	485	296	523	320	485	608	588
AT1G06475	32	47	33	31	8	6	4	3	35	29	20	37	13	15	18	38
AT1G06480	0	0	0	0	0	0	0	0	0	0	0	0	0	0	0	0
AT1G06490	288	381	309	352	273	308	244	109	431	345	239	430	294	300	366	388
AT1G06500	207	261	212	213	137	138	126	32	195	214	86	162	109	143	224	220
AT1G06515	306	342	313	331	371	315	212	150	337	292	165	340	230	329	381	373
AT1G06510	294	339	259	342	214	248	181	66	313	288	132	284	140	227	336	323
AT1G06520	58	74	127	94	101	103	53	51	73	56	43	91	92	151	133	169
AT1G06530	1192	1492	1130	1331	1181	954	745	422	1173	1036	596	1060	686	1028	1361	1230
AT1G06540	17	23	14	16	23	21	13	9	8	6	5	17	5	11	2	5
AT1G06550	1833	2664	2094	2251	1700	1535	1354	551	1516	1278	801	1517	797	1136	1019	1227
AT1G06560	341	384	287	367	256	230	191	129	443	406	232	375	210	271	377	354
AT1G06570	1144	1734	1460	1461	5481	5653	5876	2374	1005	840	509	1102	2733	2423	5496	3927
AT1G06580	49	62	67	69	52	53	38	37	65	42	39	69	48	75	72	81
AT1G06590	266	360	339	321	412	341	260	155	320	285	157	275	203	296	339	353
AT1G06610	0	0	0	0	0	0	0	0	0	0	0	0	0	0	0	0
AT1G06620	869	1136	1018	939	1681	1212	899	496	659	506	323	736	643	1120	1429	944
AT1G06630	387	574	455	475	558	507	441	264	509	433	254	433	375	441	702	605
AT1G06640	3245	3505	3227	3927	1632	1689	1582	923	4942	3990	2551	4868	2737	4157	5985	5080
AT1G06645	191	242	230	227	177	163	123	48	182	193	90	177	100	125	212	222
AT1G06650	1013	1322	1351	1341	1270	1353	1150	508	832	798	399	841	720	993	1666	1448
AT1G06660	98	111	105	137	97	57	57	38	178	127	81	140	90	101	107	152
AT1G06670	1655	1930	1805	2026	1076	975	759	472	2040	1849	1090	1890	1036	1289	1477	1539
AT1G06680	60589	61755	54725	69520	19361	27503	40176	15926	74187	61196	31528	64742	31866	35658	82002	95091
AT1G06690	737	1012	751	802	416	450	474	222	758	667	436	709	450	545	1000	732
AT1G06700	1343	1668	1398	1488	1460	1398	1247	611	1410	1144	719	1338	1115	1357	2268	2156
AT1G06710	155	177	142	159	116	102	80	45	163	164	84	182	116	155	156	161
AT1G06720	1209	1252	1171	1348	811	563	374	301	1536	1281	767	1355	673	915	910	917
AT1G06730	319	314	278	369	226	191	155	91	335	278	204	339	164	217	321	296
AT1G06740.1	104	129	129	118	88	96	80	38	153	100	72	120	83	122	163	119
AT1G06750	22	40	25	39	48	24	23	7	40	40	19	30	28	29	36	36
AT1G06760	2934	3583	3086	3553	2641	3075	3042	1082	2848	2433	1353	2640	2253	2679	4672	4598
AT1G06770	177	212	184	199	293	193	202	99	164	152	85	158	138	156	251	212
AT1G06780	592	710	654	695	589	563	421	214	584	499	323	611	420	595	579	669
AT1G06790	155	226	228	228	127	88	70	44	215	194	126	219	110	134	170	187
AT1G06800	459	652	533	532	783	730	565	203	307	259	131	306	222	279	427	343
AT1G06810	0	0	0	0	1	0	0	0	0	0	1	2	0	1	1	1
AT1G06820	699	886	685	739	423	470	548	168	803	691	407	758	458	588	916	826
AT1G06830	65	23	31	26	79	30	8	33	88	67	40	121	13	30	32	16
AT1G06840	1272	1891	1651	1605	2247	2141	1688	1064	1218	1070	659	1203	770	1072	1061	1137
AT1G06850	248	276	216	281	179	154	111	112	351	312	208	310	161	210	245	270
AT1G06860	0	1	0	0	0	0	0	0	0	0	0	0	0	0	0	0
AT1G06870	329	399	354	446	327	276	215	139	377	313	239	370	244	362	359	360
AT1G06880	0	0	1	1	0	0	0	0	2	0	0	0	0	0	0	0
AT1G06890	1053	1264	1190	1298	1312	1192	886	543	1168	1083	671	1169	910	1172	1351	1374
AT1G06900	1422	1692	1406	1614	1055	979	729	589	1840	1587	954	1770	1125	1355	1759	1668
AT1G06910	119	144	138	122	92	90	58	37	136	98	62	89	77	84	116	130
AT1G06920	0	0	1	1	0	0	0	0	0	0	1	0	0	0	0	0
AT1G06923	11	5	8	7	24	15	1	13	23	29	16	32	16	35	21	28
AT1G06925	1	2	0	0	0	0	0	0	0	0	0	0	0	0	0	0
AT1G06930	14	6	12	15	28	39	25	30	27	31	27	34	38	29	31	35
AT1G06950	3284	3118	2987	3357	2045	2201	1809	1076	4275	3631	2288	3669	2126	2554	3884	3333
AT1G06960	253	287	252	320	168	143	122	90	284	246	124	303	153	193	272	274
AT1G06970	4	5	2	2	5	1	2	0	3	1	1	3	6	8	1	3
AT1G06980	38	42	34	27	6	3	1	1	32	37	21	39	6	6	10	14
AT1G06990	0	0	0	0	0	0	0	0	0	0	0	1	0	0	0	0
AT1G07000	430	717	634	723	1568	1031	759	482	485	373	180	423	407	684	500	743
AT1G07010	1457	2004	1369	1499	352	359	379	187	1129	964	583	1096	356	525	609	563
AT1G07020	300	316	315	337	460	361	254	214	282	238	144	273	216	310	339	388
AT1G07025	0	0	0	0	1	0	0	0	0	0	0	1	0	1	0	0
AT1G07030	411	530	503	490	696	466	287	158	340	363	260	367	295	468	483	469
AT1G07040	606	930	763	646	2113	2532	2759	1038	355	314	176	348	1181	1122	2703	2036
AT1G07050	0	1	5	7	13	13	9	4	6	3	0	5	9	14	37	20
AT1G07051	0	0	0	0	0	0	0	0	0	0	0	0	0	0	0	0
AT1G07060	3	0	0	0	2	6	3	1	1	3	2	2	1	2	0	1
AT1G07070	325	295	325	318	149	107	89	36	393	346	169	423	145	244	211	287
AT1G07080	1745	2180	1800	1882	1377	1382	1364	601	1311	1150	741	1245	1028	1341	1723	1853
AT1G07090	249	305	312	343	134	135	97	87	278	262	127	265	83	165	229	219
AT1G07100	0	0	0	1	0	0	0	0	0	0	0	0	0	0	0	0
AT1G07110	1622	2072	1820	1896	1329	1514	1665	697	2098	1914	1129	1973	1425	1597	3181	2714
AT1G07119	22	23	20	30	27	24	23	7	27	22	34	34	24	30	60	39
AT1G07120	16	37	30	29	4	6	3	3	16	13	12	9	10	7	14	13
AT1G07128	88	136	140	111	301	216	171	62	78	66	36	97	67	90	111	106
AT1G07130	61	75	70	72	119	73	75	32	76	54	36	62	54	48	68	90
AT1G07135	93	116	122	134	1044	378	388	320	63	64	48	47	105	183	263	290
AT1G07140	4210	4402	4383	4475	5278	3559	2743	2047	4784	4227	2449	4731	2683	3769	3790	4448
AT1G07150	59	110	109	106	622	498	528	174	94	66	38	78	182	214	217	175
AT1G07160	8	13	23	16	163	69	49	53	5	5	4	6	6	10	10	9
AT1G07170	191	293	261	304	438	348	272	199	315	301	188	307	219	316	423	459
AT1G07175	11	3	11	10	26	13	11	5	12	14	5	24	13	19	22	14
AT1G07180	1384	2168	1158	1452	341	422	550	204	1213	1045	581	1206	518	696	1018	636
AT1G07190	0	0	0	0	0	0	0	0	1	0	0	0	0	0	0	0
AT1G07200	618	887	704	759	1334	1232	1155	570	912	747	411	826	1130	1365	1972	1727
AT1G07210	799	821	733	777	638	513	364	191	839	750	468	923	496	683	785	756
AT1G07220	329	403	351	426	263	214	170	114	326	259	165	307	182	266	280	281
AT1G07230	881	1138	1021	939	1048	1042	878	600	828	619	370	768	641	880	1121	1304
AT1G07240	517	784	711	702	869	785	590	416	527	489	274	506	329	485	556	565
AT1G07250	734	854	817	718	617	672	652	324	548	503	344	570	567	670	1050	1101
AT1G07260	929	1170	1098	1032	1055	1086	809	350	406	290	230	431	240	427	444	573
AT1G07270	25	24	29	34	11	9	7	3	29	29	18	31	9	18	18	29
AT1G07280	1495	1862	1787	1829	1244	1855	1906	651	1511	1223	659	1224	1134	1541	2859	2519
AT1G07290	49	50	58	54	30	33	32	12	83	58	34	79	39	68	54	66
AT1G07300	74	94	70	87	96	69	56	22	61	80	38	79	56	76	69	75
AT1G07310	837	1160	966	921	1025	1074	979	679	838	712	424	824	706	925	1351	1326
AT1G07320	3918	3227	3019	3810	1793	1781	2253	1436	6114	5540	3827	5266	2864	3212	5974	5712
AT1G07330	1	1	1	1	0	3	2	1	7	5	2	8	1	3	1	0
AT1G07340	0	0	0	0	0	0	0	0	0	0	0	0	0	0	0	0
AT1G07350	795	1248	893	1002	781	607	484	279	870	709	380	813	430	608	777	721
AT1G07360	1014	1199	1172	1124	849	826	668	343	1110	996	561	1035	701	871	1147	1017
AT1G07370	315	241	253	327	101	76	65	39	342	295	200	325	120	178	166	226
AT1G07380	463	626	570	556	432	556	408	198	420	335	215	380	355	415	486	556
AT1G07390	45	87	94	108	215	199	92	78	74	45	25	52	58	77	88	80
AT1G07400	30	156	23	45	88	38	26	19	29	18	11	46	30	49	56	32
AT1G07410	68	78	78	73	61	48	27	10	72	88	42	99	75	74	74	73
AT1G07420	460	567	542	532	436	428	290	215	565	524	336	560	374	585	700	746
AT1G07430	197	735	244	149	359	184	216	95	16	18	3	12	203	323	208	165
AT1G07440	598	1011	596	523	68	116	233	77	412	352	189	370	129	139	293	375
AT1G07450	29	42	18	33	2	1	6	1	54	35	25	73	6	3	10	4
AT1G07460	1	1	1	0	1	0	0	1	12	4	1	7	1	1	1	0
AT1G07470	376	462	437	460	490	465	446	196	418	382	232	410	372	481	649	500
AT1G07473	1	2	1	0	3	2	0	1	0	1	0	0	0	3	3	0
AT1G07476	0	0	0	0	1	0	0	0	0	0	0	0	0	0	0	1
AT1G07480	311	438	357	410	468	444	397	201	415	394	217	324	333	418	570	525
AT1G07485	5	9	2	6	2	0	3	1	12	9	3	16	0	2	2	0
AT1G07490	15	23	12	23	3	7	5	2	34	35	19	32	8	7	2	11
AT1G07500	19	40	15	18	6	6	4	4	9	18	6	15	11	29	6	11
AT1G07510	1071	1373	1089	1199	938	944	822	371	1052	869	496	983	670	870	1161	1030
AT1G07520	267	320	315	353	410	365	254	164	320	308	190	338	293	335	338	426
AT1G07530	947	1360	1121	1154	1391	1222	962	543	961	789	456	790	739	889	1189	1181
AT1G07540	1	3	1	1	1	0	1	0	0	0	0	0	0	3	0	0
AT1G07550	22	16	34	18	22	18	16	11	62	52	34	45	16	25	22	43
AT1G07560	203	218	310	238	160	180	131	91	295	309	181	341	169	202	118	193
AT1G07570	186	249	203	263	509	436	233	185	358	255	150	319	237	330	417	303
AT1G07580	0	0	0	0	0	0	0	0	0	0	0	0	0	0	0	0
AT1G07590	32269	40897	40585	32952	24110	26098	22031	9298	38208	33758	20133	36794	26402	41986	42037	40499
AT1G07600	23966	30226	29344	24710	16624	18700	15810	7147	28645	24996	14021	27319	19051	30543	29752	28884
AT1G07610	1784	1814	2140	1979	910	1033	825	730	2481	2314	1220	2552	1799	3692	2172	2882
AT1G07615	229	267	236	232	307	212	165	67	310	287	123	267	156	224	282	239
AT1G07620	209	344	372	422	470	358	147	112	190	110	72	134	78	167	75	136
AT1G07630	782	1255	1170	1189	1469	1350	805	694	815	695	368	722	567	817	801	831
AT1G07640	740	1110	793	1083	662	742	631	289	631	572	316	632	302	575	827	547
AT1G07650	865	1052	915	997	1163	949	666	466	968	839	469	815	540	718	1107	1139
AT1G07645	0	0	0	0	0	0	0	0	1	0	1	0	1	0	0	0
AT1G07660	345	360	321	373	272	207	184	117	326	270	177	392	177	284	325	340
AT1G07670	1818	2092	1989	2111	2178	2028	1468	794	1891	1570	979	1914	1159	1833	1645	1827
AT1G07680	1	4	4	7	6	2	2	1	12	7	6	16	2	0	1	6
AT1G07690	2	7	8	3	21	40	35	26	7	7	2	5	8	8	12	13
AT1G07700	917	1276	1005	1139	548	521	483	312	828	622	368	689	370	647	852	773
AT1G07705	534	714	601	584	400	425	353	204	595	481	355	555	353	514	661	642
AT1G07702	0	0	0	0	0	0	0	0	0	0	0	0	0	0	0	0
AT1G07710	12	26	19	15	17	15	4	11	35	37	21	34	32	33	20	33
AT1G07720	1032	2164	883	900	540	971	859	377	487	352	273	466	865	1488	1154	665
AT1G07725	2	2	4	0	4	1	3	2	3	2	2	1	3	2	5	0
AT1G07728	301	443	349	406	511	436	387	223	341	284	148	300	288	384	616	526
AT1G07740	122	148	130	171	102	117	74	42	200	157	95	171	121	189	151	212
AT1G07730	62	62	63	80	54	68	44	15	132	107	61	129	86	130	90	149
AT1G07745	116	147	112	151	114	124	95	44	126	103	68	124	102	95	173	170
AT1G07747	0	0	0	0	0	0	0	0	0	0	0	0	0	0	0	0
AT1G07750	841	1116	955	955	485	609	429	228	799	631	398	863	667	914	987	1153
AT1G07760	0	0	0	0	0	0	0	0	0	0	0	0	0	0	0	0
AT1G07770	3275	3446	3433	3714	3380	2561	2189	1333	4159	4014	2439	4031	2820	3650	4924	4478
AT1G07780	175	147	149	190	185	138	94	79	207	250	114	221	129	160	203	171
AT1G07790	634	578	529	709	257	251	184	85	720	636	361	772	277	410	423	376
AT1G07795	8	4	5	2	8	9	5	4	6	8	7	12	9	11	4	12
AT1G07800.1	0	0	0	0	0	0	0	0	0	0	0	0	0	0	0	0
AT1G07810	1278	1671	1508	1525	1871	1813	1467	586	1337	1222	643	1366	1110	1537	1817	1726
AT1G07820	1274	1294	1186	1425	894	673	679	514	1496	1249	757	1371	865	1030	1304	1320
AT1G07830	351	372	363	405	391	258	217	143	488	440	219	424	257	326	414	454
AT1G07840	575	590	521	587	343	239	254	107	536	519	309	479	254	305	447	433
AT1G07850	2	3	2	0	3	2	2	1	2	0	0	1	4	5	0	0
AT1G07870	723	1004	712	694	347	277	212	135	811	682	349	694	215	370	336	339
AT1G07860	2	9	1	4	11	5	3	1	2	2	0	2	2	3	2	2
AT1G07880	218	252	209	254	94	102	85	47	298	265	174	280	103	140	164	187
AT1G07885	3	5	2	3	4	5	3	3	6	2	1	5	0	4	6	5
AT1G07890	13960	14228	18347	15951	16584	13435	9759	5950	12459	12187	7557	14626	8392	13300	12654	14276
AT1G07900	36	156	54	54	71	61	128	51	7	6	2	4	95	189	71	75
AT1G07901	1	0	1	1	2	4	0	1	1	1	1	2	0	0	0	0
AT1G07910	795	1010	747	811	522	537	488	230	656	568	328	630	423	559	664	659
AT1G07920	6024	6220	6447	6468	4642	3927	3052	2090	6782	6108	3422	6596	3999	5433	5776	5673
AT1G07930	10223	10701	10860	10475	7330	6141	4275	2304	11266	10011	5408	11252	5238	8143	8408	8331
AT1G07940	4502	4659	4950	5077	3449	2986	2283	1009	5116	4289	2471	5052	3051	4381	4267	4277
AT1G07950	243	305	266	278	265	211	151	110	262	230	139	225	157	249	314	329
AT1G07960	510	612	583	603	600	486	399	174	540	471	334	580	417	480	620	626
AT1G07970	323	349	346	356	240	251	214	126	428	395	198	354	233	252	391	342
AT1G07980	260	353	267	262	266	212	180	98	237	196	114	234	159	222	326	287
AT1G07985	13	28	13	25	53	44	41	18	12	8	2	5	40	60	83	78
AT1G07990	1372	1885	1616	1644	1452	1469	1203	617	1430	1192	725	1301	1066	1171	1647	1624
AT1G08000	189	200	152	188	133	134	90	67	185	161	104	157	112	148	190	172
AT1G08005	2	0	0	0	0	1	0	0	2	1	0	1	1	1	0	0
AT1G08010	340	376	316	403	251	228	207	101	393	382	230	451	289	334	432	425
AT1G08030	470	492	531	531	556	420	325	229	454	399	239	426	346	454	606	572
AT1G08032	0	0	0	0	0	0	0	0	0	0	0	0	0	0	0	0
AT1G08035	3	5	4	1	3	0	2	0	0	3	5	1	0	3	3	3
AT1G08040	600	873	638	646	347	346	405	107	528	489	281	476	406	516	693	667
AT1G08050	292	486	465	472	1215	947	721	456	270	231	158	258	334	523	394	443
AT1G08060	677	960	688	808	636	621	605	354	722	560	358	618	395	553	901	732
AT1G08065	0	0	0	0	0	0	0	0	0	0	0	0	0	0	0	0
AT1G08070	33	29	32	24	40	25	12	10	21	34	13	20	22	31	37	32
AT1G08080	20	43	33	36	1	8	2	4	5	2	0	1	1	1	0	4
AT1G08090	322	400	613	356	89	96	54	52	218	333	125	199	99	240	82	248
AT1G08100	0	0	0	0	0	0	0	0	0	0	0	0	0	0	0	0
AT1G08105.1	0	0	0	0	0	0	0	0	0	0	0	0	0	0	0	0
AT1G08110	1764	2360	1818	1753	1178	1128	1095	318	1740	1432	809	1512	1171	1465	2062	2240
AT1G08115	25	44	35	26	26	34	11	4	47	41	6	30	22	21	18	61
AT1G08120	0	8	0	0	1	0	0	0	2	1	0	3	1	1	1	1
AT1G08125	345	469	331	412	386	349	284	108	380	350	189	337	244	379	536	479
AT1G08130	813	887	762	772	403	409	258	144	891	707	440	830	393	580	620	678
AT1G08135	0	0	0	0	0	0	0	0	0	0	0	0	0	0	0	1
AT1G08140	0	0	0	0	0	0	0	0	0	0	0	0	0	0	0	0
AT1G08150	0	0	0	0	1	0	0	0	0	0	0	0	1	0	0	0
AT1G08160	226	226	193	212	207	235	204	141	373	314	211	394	195	267	350	353
AT1G08165	17	17	10	16	12	10	7	1	30	13	15	19	8	5	8	20
AT1G08170	0	3	0	1	1	1	0	0	0	3	0	0	0	2	0	0
AT1G08180	107	132	102	130	96	122	87	39	98	78	45	63	78	80	97	106
AT1G08190	3119	4011	3481	3670	1975	2033	1632	656	2728	2486	1420	2837	1694	2380	2560	2681
AT1G08200	4300	5067	4019	4876	2457	2019	1968	1127	5210	4342	2672	5193	3013	4242	5888	4278
AT1G08210	305	458	297	376	502	499	436	153	300	266	152	278	324	395	657	565
AT1G08220	151	165	142	166	79	95	43	32	146	149	91	159	73	114	102	109
AT1G08230	304	425	259	328	456	475	377	175	206	169	70	163	237	333	395	319
AT1G08240	0	0	0	0	0	0	0	0	0	0	0	0	0	0	0	0
AT1G08250	291	448	358	400	407	389	205	129	268	221	142	245	151	265	244	239
AT1G08260	773	893	862	955	453	464	352	193	914	782	480	875	521	605	778	817
AT1G08270	17	29	13	29	17	8	14	9	30	22	11	11	15	15	30	17
AT1G08280	213	198	188	230	99	95	60	49	240	188	116	213	71	103	118	137
AT1G08290	133	189	174	192	221	169	141	90	90	98	76	109	55	89	79	115
AT1G08300	99	120	90	100	135	113	65	41	111	112	35	106	71	98	153	105
AT1G08310	54	41	44	45	66	57	51	26	61	52	31	51	60	87	60	79
AT1G08315	176	283	242	250	422	392	447	229	190	141	75	184	203	252	300	266
AT1G08320	344	441	505	417	477	543	460	296	509	466	277	574	483	506	461	605
AT1G08340	136	156	141	130	135	129	88	109	166	140	114	229	208	202	197	264
AT1G08350	285	337	355	381	295	231	180	127	363	295	252	363	247	263	290	368
AT1G08360	3826	3850	3972	4419	3469	2595	2045	1034	4754	4390	2288	4916	2852	3733	4022	4247
AT1G08370	756	884	870	896	983	873	772	577	852	756	461	741	676	822	1085	1037
AT1G08380	40296	46445	36290	48490	15046	21000	29783	8522	47205	37821	21005	40333	22500	25661	62090	62779
AT1G08390	76	94	78	83	34	45	46	10	81	88	48	98	45	60	92	93
AT1G08400	164	233	180	212	117	142	106	54	156	158	104	167	112	134	164	192
AT1G08410	547	591	545	566	337	255	179	103	619	578	290	627	228	340	351	389
AT1G08420	1626	2032	1754	1916	1833	1585	1457	619	1660	1510	784	1588	1128	1455	1990	1951
AT1G08430	111	50	75	141	71	64	51	35	270	188	163	227	189	203	181	264
AT1G08440	3	7	3	6	1	1	1	0	3	0	1	1	0	2	2	1
AT1G08450	1485	2095	2583	3297	4242	2963	2540	1662	1312	1128	592	1229	1633	3347	2540	3935
AT1G08460	488	706	571	578	560	544	460	195	506	368	225	394	350	431	669	796
AT1G08465	146	208	144	188	57	77	114	28	160	125	80	143	67	101	184	151
AT1G08470	465	479	403	531	265	221	218	79	526	400	226	488	256	349	388	404
AT1G08480	1122	1353	1262	1371	944	828	690	299	1065	967	614	1199	755	1061	1269	1359
AT1G08490	689	817	745	871	857	789	598	352	765	699	444	740	577	656	913	884
AT1G08500	58	51	33	66	56	43	24	31	101	76	80	100	115	152	100	149
AT1G08510	2336	2833	2228	2407	1999	1949	1573	921	2553	2259	1305	2466	1568	2428	2680	2785
AT1G08520	3481	3760	3366	3995	2420	2617	3132	1480	4693	4152	2538	3796	3094	3524	7061	6145
AT1G08530	219	306	285	237	152	124	120	74	197	189	109	177	109	151	222	222
AT1G08540	1525	1490	1276	1635	694	918	1002	368	1952	1762	1047	1714	920	1063	1977	1666
AT1G08550	927	807	894	851	651	851	862	405	910	932	627	831	704	738	1858	1791
AT1G08560	576	570	554	655	317	221	183	124	846	739	437	741	441	543	687	681
AT1G08570	815	1268	1073	1055	2255	1997	1812	659	1088	877	536	880	1873	2129	2873	2558
AT1G08580	528	498	511	546	267	204	161	120	558	469	341	600	211	306	267	337
AT1G08590	262	207	316	265	158	109	53	85	530	508	270	623	322	440	369	571
AT1G08592	100	134	86	120	93	76	87	60	100	93	75	120	75	88	136	131
AT1G08600	1272	1561	1314	1589	1153	1139	922	427	1334	1053	686	1333	910	1193	1450	1426
AT1G08610	134	110	109	113	48	55	41	19	148	130	87	139	59	69	77	90
AT1G08620	1084	1412	1265	1352	1250	1242	885	553	1158	953	557	1016	700	992	1202	1211
AT1G08630	99	233	135	122	2825	3094	2961	811	29	14	17	68	241	232	443	389
AT1G08640	1311	1272	1170	1096	565	624	508	299	1037	1056	643	1018	538	820	1149	986
AT1G08650	1042	1221	1057	1078	599	344	179	129	899	912	518	909	454	797	520	847
AT1G08660	796	963	805	902	654	559	465	214	963	875	452	875	565	679	1044	1011
AT1G08670	72	89	68	75	56	50	37	13	72	56	42	70	39	58	63	71
AT1G08680	965	1219	1026	1135	977	1032	964	484	1235	1049	632	1058	859	1004	1511	1421
AT1G08695	0	0	0	0	0	0	0	0	0	0	0	0	0	0	0	0
AT1G08700	758	950	821	874	526	525	472	274	737	620	416	665	428	543	702	777
AT1G08710	218	253	220	224	221	239	138	59	219	143	94	168	135	158	227	214
AT1G08720	595	830	739	830	1002	1092	847	553	619	539	295	597	684	797	1080	1128
AT1G08730	30	24	21	26	29	24	15	19	60	29	18	47	21	36	47	48
AT1G08735.1	0	0	0	0	0	0	0	0	0	0	0	0	0	0	0	0
AT1G08740.1	0	0	0	0	0	0	0	0	0	0	0	0	0	0	0	0
AT1G08750	288	354	306	339	257	223	181	94	286	246	197	261	228	226	308	335
AT1G08760	522	672	560	665	580	584	500	267	684	543	375	640	507	579	707	762
AT1G08770	241	313	286	297	268	210	161	65	289	232	165	247	141	235	322	281
AT1G08780	311	329	338	357	356	286	230	176	380	315	212	362	239	286	357	401
AT1G08790	0	0	0	0	0	0	0	0	0	0	0	0	0	0	0	2
AT1G08800	929	1334	1219	1300	2275	2090	1681	943	986	819	527	1018	1229	1761	1676	1633
AT1G08810	111	150	97	173	65	59	35	16	182	151	82	181	47	35	105	101
AT1G08820	1063	1485	1321	1306	1503	1371	1110	683	1243	1021	686	1133	915	1137	1480	1517
AT1G08830	3460	4689	5601	4623	6172	5413	5352	1675	3242	3575	2033	3856	2777	3429	3550	4208
AT1G08840	195	257	198	274	170	150	104	77	264	217	126	271	135	181	200	194
AT1G08845	101	112	103	94	101	96	53	21	119	74	53	82	43	76	94	84
AT1G08860	4	6	7	10	3	4	8	0	3	2	1	3	5	5	2	1
AT1G08870	0	0	0	0	0	0	0	0	0	0	0	0	0	0	0	0
AT1G08880	1303	1465	1304	1314	838	819	760	453	1183	1102	591	1075	717	933	1240	1287
AT1G08890	588	584	612	470	496	606	474	254	304	273	213	382	529	683	800	800
AT1G08900	263	357	335	366	591	611	455	261	273	258	127	240	262	321	512	624
AT1G08910	700	846	731	808	675	687	576	351	643	566	322	598	421	544	789	706
AT1G08920	609	693	609	610	516	601	520	173	537	397	260	519	530	889	985	814
AT1G08930	2414	3840	3605	3375	5129	4754	3912	2687	3101	2845	1546	2823	2001	2819	2998	3203
AT1G08940	268	453	337	388	795	594	497	184	228	215	152	239	170	269	230	276
AT1G08950	0	0	0	0	0	0	0	0	0	0	0	0	0	0	0	0
AT1G08960	309	329	281	341	175	162	108	102	259	231	187	273	177	198	282	252
AT1G08970	907	1083	935	972	698	700	629	228	740	683	422	713	526	678	881	837
AT1G08980	361	421	403	438	572	917	1119	323	483	386	242	384	729	655	1952	1961
AT1G08985	0	0	0	0	0	0	0	0	0	0	0	0	0	0	0	0
AT1G08990	226	189	242	225	73	99	67	46	324	285	176	370	222	209	176	230
AT1G09000	159	176	160	197	170	114	98	61	180	175	100	189	146	146	152	176
AT1G09010	1382	1740	1575	1740	1479	1626	1594	769	1583	1432	831	1463	1229	1537	2491	2407
AT1G09020	1158	1476	1349	1374	940	1015	875	406	1349	1175	723	1248	816	1088	1292	1342
AT1G09026	0	0	0	0	0	0	0	0	0	0	0	0	0	0	0	0
AT1G09030	0	0	0	0	0	0	0	0	0	4	0	2	0	0	1	0
AT1G09040	115	154	142	147	127	129	95	56	134	103	62	126	108	131	193	174
AT1G09050	119	170	130	137	127	110	105	61	186	126	72	131	84	111	174	194
AT1G09060	850	1046	876	1023	1008	932	723	415	999	834	462	861	745	789	1222	1102
AT1G09070	1563	2120	2356	2521	3253	2104	1611	1164	1664	1503	756	1670	1761	2613	3150	2590
AT1G09080	137	185	183	235	470	205	161	180	34	15	6	9	72	528	79	126
AT1G09090	996	1496	1199	1075	357	394	251	225	1063	909	505	1073	217	406	310	557
AT1G09100	853	981	831	903	632	773	502	241	712	565	281	630	429	676	655	782
AT1G09110	0	0	0	0	0	0	0	0	0	0	0	0	0	0	0	0
AT1G09130	3682	4548	3721	3785	2935	2931	2894	1558	3211	2671	1693	2734	2172	2918	5052	4117
AT1G09140	1376	2195	1580	1732	1319	1431	1220	670	1434	1207	750	1297	893	1168	1750	1606
AT1G09150	678	736	768	709	502	436	409	275	750	656	426	718	527	641	827	896
AT1G09155	26	44	37	37	25	17	19	5	29	27	22	42	27	33	43	48
AT1G09157	0	1	0	1	3	1	0	0	2	2	1	0	1	5	1	0
AT1G09160	613	629	627	668	305	263	216	160	734	617	386	665	259	321	472	455
AT1G09170	96	83	60	96	27	39	18	23	173	134	76	171	91	116	94	130
AT1G09176	1	3	4	0	3	2	3	2	2	3	1	4	3	4	8	6
AT1G09180	52	71	46	65	30	41	33	18	36	43	18	47	16	56	69	36
AT1G09190	51	39	53	66	35	43	25	11	52	49	32	60	36	42	46	40
AT1G09195	159	266	231	255	255	275	204	105	163	145	88	154	171	212	301	322
AT1G09200	1251	1003	915	1126	472	337	323	190	1276	1139	622	1261	585	695	704	876
AT1G09210	5274	4935	6029	6537	6953	5469	3039	2481	5455	4607	2809	5667	3278	5438	4244	4941
AT1G09220	30	26	32	27	19	18	11	6	21	10	10	13	14	20	24	30
AT1G09230	273	312	309	336	397	417	369	196	354	307	222	300	364	393	759	592
AT1G09240	176	85	389	188	217	181	217	72	97	115	85	148	126	261	394	247
AT1G09245	0	0	0	0	0	0	0	0	0	0	0	0	0	0	0	0
AT1G09250	306	309	358	377	465	339	254	102	497	464	191	484	304	428	629	561
AT1G09260	0	0	0	0	0	0	0	0	0	0	0	0	0	0	0	0
AT1G09270	1383	1673	1529	1661	1455	1402	968	580	1621	1425	945	1583	1021	1392	1717	1643
AT1G09280	417	551	423	490	590	484	431	191	474	448	280	477	353	464	658	698
AT1G09290	214	254	215	197	187	210	140	100	229	200	113	225	107	169	237	257
AT1G09300	261	345	302	313	195	178	121	95	317	268	147	302	177	199	188	208
AT1G09310	29714	40273	22373	19796	3839	4622	12220	3558	11366	10986	5780	12106	10370	15386	24363	15339
AT1G09320	200	267	235	221	219	187	151	72	251	188	142	225	135	199	220	250
AT1G09330	631	648	681	713	598	468	341	186	609	530	349	642	381	552	631	639
AT1G09340	10531	12165	9441	12853	4589	4782	6651	2903	15155	13125	7597	15041	6692	8623	14898	10751
AT1G09350	34	38	29	52	13	8	6	3	164	133	37	123	86	48	155	39
AT1G09360	0	0	0	0	0	0	0	0	0	0	0	0	0	0	1	0
AT1G09370	2	2	5	1	0	0	1	0	3	5	0	3	3	2	3	3
AT1G09380	26	19	27	21	8	12	8	5	21	19	11	25	10	17	27	16
AT1G09390	219	227	246	330	73	94	129	65	329	312	197	379	147	168	256	341
AT1G09400	6	3	9	7	5	4	2	0	1	5	0	5	5	9	6	4
AT1G09410	31	25	28	28	18	33	20	6	29	27	16	33	13	16	37	35
AT1G09415	240	295	282	289	313	330	223	146	205	215	107	185	172	256	442	505
AT1G09420	210	276	228	286	553	604	385	233	227	192	118	202	196	238	453	350
AT1G09421	9	13	9	4	7	7	5	0	3	5	2	8	10	3	20	12
AT1G09430	1754	2252	2270	2468	5133	4800	3562	1432	1969	1694	973	1719	1944	2456	3673	3806
AT1G09440	260	335	268	261	55	79	68	30	255	211	113	225	108	117	190	195
AT1G09450	111	107	84	121	68	73	48	30	144	123	72	137	71	96	104	134
AT1G09460	361	427	464	490	1234	1265	1186	695	317	265	201	353	819	813	1171	1029
AT1G09470	162	120	129	174	46	45	47	29	206	168	104	142	68	92	135	102
AT1G09480	68	85	85	86	156	125	108	37	42	40	20	35	25	35	29	38
AT1G09483	0	0	1	0	0	0	0	0	0	0	1	0	0	0	0	0
AT1G09486	50	73	49	76	49	32	21	7	59	33	30	46	25	52	40	39
AT1G09490	489	768	496	622	661	742	799	341	436	344	211	397	428	492	959	815
AT1G09500	122	153	272	221	335	320	229	101	61	63	31	46	81	139	227	129
AT1G09510	1	0	0	0	6	4	1	1	1	0	0	0	1	1	0	0
AT1G09520	232	328	247	261	390	278	202	180	212	230	146	249	206	232	302	307
AT1G09530	307	578	301	334	686	504	435	245	165	117	75	153	252	460	592	348
AT1G09540	25	32	21	37	16	23	15	7	49	47	59	52	63	76	35	65
AT1G09550	0	0	0	0	0	0	0	0	0	0	0	0	0	0	0	0
AT1G09560	4705	5930	6362	4793	5515	5465	3790	5422	11234	13120	7062	12688	3743	4570	4748	5115
AT1G09570	2152	2676	2582	2656	4628	5091	4336	1693	2780	2439	1293	2581	3581	3722	7314	7580
AT1G09575	52	44	66	47	278	165	132	64	62	42	38	48	81	66	143	133
AT1G09580	176	164	154	183	134	118	91	63	197	155	106	231	160	180	233	220
AT1G09590	3234	3068	3298	3661	2225	1649	1147	754	3850	3421	1596	3946	1946	2687	2503	2698
AT1G09600	57	54	36	63	28	16	19	16	81	71	23	50	49	22	42	53
AT1G09610	26	20	24	26	10	6	4	2	23	25	14	30	24	20	26	19
AT1G09620	3276	3749	3277	3614	2683	2600	2120	1164	4043	3438	2032	3516	2284	3045	4118	3945
AT1G09625	0	0	0	0	0	0	0	0	0	0	0	0	0	0	0	0
AT1G09630	392	468	446	482	562	474	357	235	480	407	211	476	291	370	385	423
AT1G09640	5386	6065	5804	5956	5911	4610	3510	1866	5977	5330	2806	5899	3494	4761	5774	5657
AT1G09645	344	473	393	455	575	509	427	174	345	302	177	367	237	322	406	443
AT1G09650	11	8	7	5	6	7	5	5	9	10	3	9	3	8	23	9
AT1G09660	536	576	500	600	299	318	244	121	695	612	359	650	330	412	539	575
AT1G09665	0	0	0	0	0	0	0	0	0	0	0	0	0	0	0	0
AT1G09680	39	68	40	54	42	38	30	20	38	37	30	43	26	40	50	64
AT1G09690	5103	4772	4958	5696	4296	3043	2330	1384	6348	5962	2496	6677	3713	5028	5542	5452
AT1G09700	232	285	197	216	139	139	74	77	263	250	144	252	108	167	198	201
AT1G09710	149	192	136	133	123	134	108	64	156	154	70	148	105	108	206	214
AT1G09720	0	0	0	0	0	0	0	1	0	0	0	0	0	0	0	0
AT1G09730	1001	1325	1084	1228	1344	1147	1019	596	1122	905	556	959	843	989	1283	1334
AT1G09740	1209	1425	1554	1244	1057	1317	1020	770	1416	1122	702	1410	808	1054	988	1361
AT1G09750	2073	721	1389	1189	544	669	913	571	4082	3717	2707	3159	1612	1466	3366	4375
AT1G09760	668	830	695	773	706	615	490	221	809	721	407	859	509	703	898	880
AT1G09770	3026	3835	3110	3331	3965	3513	3172	1739	3596	3349	1766	3424	2735	3308	5114	4880
AT1G09780	5264	6060	6156	6446	4258	3998	2593	1780	6363	5714	3522	7042	3719	6008	4662	5259
AT1G09790	0	1	0	0	0	0	0	0	7	12	11	9	0	0	0	0
AT1G09794	46	74	53	90	83	67	47	28	65	53	29	55	44	65	70	63
AT1G09795	1056	1358	913	1068	689	662	805	315	1039	859	567	842	757	947	1862	1291
AT1G09800	91	110	76	102	39	29	39	18	107	78	58	93	47	63	82	67
AT1G09810	207	286	241	260	245	267	205	103	267	216	131	239	135	152	240	216
AT1G09812	15	28	25	29	7	8	5	5	28	20	23	18	13	12	11	12
AT1G09815	318	336	337	363	377	326	260	133	292	243	168	285	191	269	355	346
AT1G09820	117	188	130	160	67	77	67	25	138	138	76	121	61	112	142	109
AT1G09830	692	768	713	718	312	313	233	158	739	612	384	643	263	467	483	502
AT1G09840	1409	1908	1696	1696	687	735	574	272	1315	1249	815	1284	682	943	1158	1232
AT1G09850	675	830	740	616	487	520	459	229	487	438	287	531	504	651	879	763
AT1G09860	0	0	0	1	0	0	0	0	1	3	1	0	4	1	3	1
AT1G09870	550	676	619	657	450	499	445	210	542	462	269	561	417	547	644	686
AT1G09880	34	41	34	36	25	33	24	15	40	44	25	47	29	44	43	47
AT1G09890	133	131	140	111	22	39	30	16	88	64	50	71	52	49	51	64
AT1G09900	304	321	298	274	126	135	106	49	405	348	197	347	130	166	294	211
AT1G09910	448	683	515	597	528	534	517	226	478	386	210	400	371	512	830	822
AT1G09920	656	764	746	761	913	746	633	280	609	541	289	606	466	619	732	789
AT1G09930	6	6	10	5	30	17	9	5	4	1	1	6	2	11	3	2
AT1G09932	156	233	362	313	561	494	411	119	162	130	79	146	224	363	198	272
AT1G09935	0	2	3	1	1	1	0	0	0	0	1	1	0	0	0	0
AT1G09940	382	517	495	508	1489	915	791	390	462	440	259	411	496	660	743	727
AT1G09950	7	16	18	11	11	6	5	3	7	1	10	15	30	30	15	7
AT1G09960	243	318	294	317	238	224	174	109	255	210	144	247	198	267	327	302
AT1G09970	7783	11427	11524	10504	17175	13112	8256	5961	5353	4698	3024	5337	4734	7486	8878	6685
AT1G09980	762	1002	870	986	786	733	547	309	835	727	460	773	489	716	868	901
AT1G09995	58	86	83	98	66	70	59	25	78	56	44	88	56	71	98	79
AT1G10000	5	1	1	2	4	2	2	0	5	6	4	1	3	0	5	5
AT1G10010	0	0	1	4	0	0	0	0	2	1	1	0	0	0	0	4
AT1G10020	397	371	301	371	227	239	142	84	634	489	287	597	263	328	557	612
AT1G10030	203	186	198	207	170	133	108	91	307	261	195	308	162	199	213	243
AT1G10040	103	164	134	158	228	104	81	45	102	110	42	96	65	97	74	111
AT1G10050	574	840	655	743	816	763	540	296	578	507	279	584	419	590	497	667
AT1G10060	113	179	110	127	326	191	205	107	174	138	95	167	226	336	383	185
AT1G10070	400	633	474	484	5452	5875	4899	1696	118	86	40	181	1314	987	3917	2006
AT1G10090	730	842	773	827	584	699	642	360	650	525	394	655	748	984	1407	1093
AT1G10095	97	144	112	138	118	108	103	56	124	90	72	81	90	118	148	146
AT1G10100	0	0	0	0	0	0	0	0	0	0	0	0	0	0	0	0
AT1G10110	15	14	14	18	12	6	9	1	17	15	2	14	9	8	13	13
AT1G10120	426	426	431	510	272	259	193	132	557	429	282	466	282	365	423	548
AT1G10130	1174	1457	1350	1480	971	934	733	364	1281	1226	745	1257	907	1002	1291	1442
AT1G10140	546	868	721	650	2518	1875	1692	1027	479	353	280	467	759	1026	1231	1191
AT1G10150	303	345	354	371	920	737	698	360	396	334	223	401	386	502	740	696
AT1G10155	12	7	14	16	11	13	6	1	14	6	4	9	9	10	9	13
AT1G10160.1	216	283	213	286	145	161	122	73	188	224	126	231	134	172	219	200
AT1G10170	1242	1739	1386	1475	2322	1842	1579	845	1504	1201	670	1337	1263	1774	2023	1910
AT1G10180	653	795	648	767	424	448	364	211	737	590	372	676	377	472	602	579
AT1G10190	0	0	0	0	0	0	0	0	0	0	0	0	0	0	0	0
AT1G10200	1421	1577	1427	1495	941	903	823	335	1596	1344	781	1496	1130	1469	1811	2226
AT1G10210	171	266	212	223	245	259	211	114	192	150	113	204	191	248	309	370
AT1G10220	10	9	10	7	4	9	9	12	7	7	3	6	9	11	13	17
AT1G10230	137	185	116	163	141	99	76	32	144	97	65	156	86	110	134	113
AT1G10240	220	242	236	272	145	157	126	78	227	207	118	253	121	144	271	244
AT1G10250	0	0	0	0	0	0	0	0	0	0	0	0	0	0	0	0
AT1G10260.1	0	0	0	0	0	0	0	0	0	0	0	0	0	0	0	1
AT1G10270	480	492	467	465	210	177	96	79	497	468	276	494	187	297	284	271
AT1G10280	177	185	159	185	115	89	76	54	131	116	76	125	88	107	115	146
AT1G10290	2401	2758	2661	2843	2782	2394	1966	1174	2774	2365	1337	2664	1792	2470	2834	2666
AT1G10300	77	96	61	100	67	66	39	29	109	122	56	119	54	81	73	85
AT1G10310	323	465	338	392	201	218	193	84	303	249	122	266	167	234	282	301
AT1G10320	461	587	455	579	450	442	373	154	442	379	176	381	346	359	547	567
AT1G10330	35	35	23	36	17	20	21	6	33	29	11	22	18	23	42	38
AT1G10340	70	83	242	230	337	423	350	199	63	82	36	61	197	239	204	284
AT1G10350	411	527	422	394	286	259	293	114	365	312	183	367	230	284	370	417
AT1G10360	410	520	432	561	168	200	374	140	614	517	311	557	331	414	710	659
AT1G10370	804	1226	670	1023	485	556	477	308	545	480	277	579	792	1148	1318	462
AT1G10380	216	320	247	241	67	95	59	55	307	283	209	393	242	260	294	369
AT1G10385	6	6	3	4	0	0	0	0	16	9	11	14	6	9	8	12
AT1G10390	2092	2741	2397	2675	2488	2344	1969	889	2523	2160	1124	2288	1708	2185	2943	2638
AT1G10400	45	37	43	53	42	25	15	23	80	78	60	106	75	90	46	67
AT1G10410	1311	1923	1904	1917	2027	1903	1356	763	1145	955	692	1177	943	1285	1381	1303
AT1G10417	19	27	44	44	71	37	31	35	36	20	15	29	19	37	21	39
AT1G10419	0	0	0	0	0	0	0	0	0	0	0	0	0	0	0	0
AT1G10430	570	669	615	698	556	464	384	182	646	583	351	616	422	513	630	655
AT1G10440	0	0	0	0	0	0	0	0	0	0	0	0	0	0	0	0
AT1G10450	856	1129	936	992	1017	916	743	390	899	820	495	816	690	931	1146	1019
AT1G10455	1	0	0	0	0	0	0	0	0	0	0	0	0	0	0	0
AT1G10460	32	35	43	27	7	6	10	8	31	30	28	35	13	20	33	29
AT1G10470	1153	787	1298	1035	622	552	807	367	1227	1194	819	1501	1144	1502	2042	2177
AT1G10480	148	230	260	233	98	77	120	46	90	83	67	95	56	105	70	112
AT1G10490	795	882	851	872	515	409	248	197	917	835	511	909	417	526	513	589
AT1G10500	1068	1438	1131	1336	1152	1199	1091	442	795	731	461	790	625	982	1760	1246
AT1G10510	790	815	693	865	430	423	387	193	942	836	510	862	479	600	901	744
AT1G10520	57	59	55	75	56	52	35	20	65	73	19	75	43	55	65	56
AT1G10522	319	270	223	277	100	89	90	32	421	363	193	366	133	161	216	207
AT1G10530	30	18	23	23	27	31	20	15	50	40	24	62	46	59	39	46
AT1G10538	0	0	0	0	0	0	0	0	0	0	0	0	0	0	0	0
AT1G10540	24	38	33	35	28	15	15	12	18	16	6	10	1	10	9	9
AT1G10550	57	57	61	67	12	7	5	3	97	79	51	116	43	44	25	68
AT1G10560	68	90	76	101	169	111	82	60	115	93	60	100	145	175	114	126
AT1G10570	560	746	576	647	478	420	325	156	607	511	256	497	376	513	748	628
AT1G10580	1001	1167	1097	1151	2063	933	684	438	974	852	508	907	852	1482	1205	1027
AT1G10585	25	6	86	123	854	430	152	85	13	13	9	11	126	297	171	68
AT1G10586	9	0	4	1	1	4	0	1	4	7	3	4	1	0	2	11
AT1G10588	0	0	0	2	0	0	0	0	1	0	0	0	0	0	0	0
AT1G10590	1519	1864	1574	1784	2195	1496	1206	786	1712	1487	855	1628	1263	1858	2038	1893
AT1G10600	309	397	306	350	260	331	292	116	266	234	147	245	273	319	557	531
AT1G10610	188	268	177	204	148	143	192	96	202	140	85	165	132	149	261	317
AT1G10620	1	0	0	2	0	0	0	0	1	0	0	1	0	0	0	0
AT1G10630	1280	1522	1404	1586	1078	963	659	377	1494	1299	827	1442	858	1304	1262	1463
AT1G10640	426	498	310	546	72	71	99	45	491	343	268	413	153	173	155	191
AT1G10650	421	566	500	573	213	258	195	120	547	456	307	563	222	290	304	328
AT1G10652	0	0	0	0	0	0	0	0	0	0	0	0	0	0	0	0
AT1G10657	142	119	176	219	30	29	48	18	245	175	126	193	37	38	62	75
AT1G10660	465	669	534	523	395	411	451	223	470	387	298	454	403	442	793	838
AT1G10670	3634	4462	3551	3985	3205	2646	2377	1262	4005	3514	2131	3855	2541	3509	4513	4138
AT1G10680	5	3	6	11	3	4	5	2	18	11	6	13	15	7	19	16
AT1G10682	1364	1285	1594	1402	1199	1019	901	549	1475	1513	763	1417	1574	1722	2482	2693
AT1G10690	55	65	67	92	101	88	101	57	50	52	40	49	46	58	77	77
AT1G10700	475	701	655	608	1376	1135	863	358	456	397	262	442	496	738	1239	839
AT1G10705	0	0	0	0	0	0	0	0	0	0	0	0	0	0	0	0
AT1G10710	5	3	2	7	7	0	0	1	5	7	5	13	10	7	8	5
AT1G10717	0	0	0	0	0	0	0	0	0	0	0	0	0	0	0	0
AT1G10720	516	673	602	627	590	607	431	212	480	435	246	506	391	486	546	601
AT1G10730	189	295	235	251	198	180	122	97	204	147	114	187	136	200	235	219
AT1G10740	538	724	589	640	852	737	613	301	689	612	355	600	668	819	904	939
AT1G10745	0	0	0	0	0	0	0	0	0	0	0	0	0	0	0	0
AT1G10747	0	0	0	0	0	0	0	0	0	0	0	0	0	0	0	0
AT1G10750	119	122	99	139	30	28	22	25	142	113	87	99	72	87	90	106
AT1G10760	4960	6480	5514	5079	1930	2778	3650	1062	3817	3444	1911	3132	3640	4126	7864	6367
AT1G10770	1	0	0	1	1	0	3	0	4	1	2	1	3	3	3	4
AT1G10780	108	106	91	148	36	21	31	22	146	121	86	143	65	90	92	96
AT1G10790	14	25	11	22	6	6	2	1	16	25	15	27	9	12	10	12
AT1G10800	25	21	20	22	12	10	4	6	17	11	7	26	7	11	15	14
AT1G10810	30	35	37	37	16	9	6	3	45	41	27	71	32	46	47	45
AT1G10820	466	585	473	535	375	339	273	185	514	448	301	473	327	374	524	522
AT1G10830	486	563	437	493	397	411	441	275	437	382	268	414	364	477	714	567
AT1G10840	2205	2481	2315	2525	2077	1772	1471	756	2802	2689	1459	2712	1616	2077	2654	2683
AT1G10850	522	498	430	555	237	207	167	91	673	528	307	625	294	383	359	422
AT1G10865	346	511	352	403	493	405	308	187	311	325	163	328	256	327	487	454
AT1G10870	696	809	665	845	444	448	389	181	791	667	387	709	395	517	572	603
AT1G10880	1	0	0	0	0	0	0	0	0	0	0	0	0	1	0	0
AT1G10890	941	1306	1106	1224	1250	1183	963	610	1173	935	508	1001	722	971	1281	1377
AT1G10900	1462	1698	1629	1902	1520	1634	1186	747	1343	1160	696	1267	1003	1246	1703	1754
AT1G10910	633	733	574	618	400	442	416	224	782	648	374	669	375	358	763	805
AT1G10920	233	372	289	324	255	197	232	96	235	181	103	153	165	251	255	314
AT1G10930	443	413	420	498	219	185	151	84	529	498	274	486	210	297	365	313
AT1G10940	1480	1984	1868	1886	1427	1355	1183	553	1617	1469	817	1500	951	1195	1697	1733
AT1G10950	3169	3583	3314	3458	2715	2492	2027	1350	3656	3125	2222	3645	2383	2861	3920	3895
AT1G10960	3246	3793	2570	3477	763	971	957	738	3768	3028	2086	3653	1031	1181	1544	1643
AT1G10970	213	231	217	249	48	62	48	26	102	87	49	106	92	106	147	198
AT1G10980	10	6	9	11	3	2	4	1	11	11	9	13	0	2	7	4
AT1G10990	195	264	284	267	339	232	212	132	265	261	140	184	83	130	91	123
AT1G11000	181	209	206	236	288	239	168	120	289	256	152	272	207	253	246	296
AT1G11010	0	0	0	0	0	0	0	0	0	0	0	0	0	0	0	0
AT1G11020	277	344	319	337	302	321	270	147	286	242	142	244	240	287	364	423
AT1G11030	0	0	0	0	0	0	0	0	0	0	0	0	0	0	0	0
AT1G11040	0	1	0	4	3	4	5	0	3	0	1	1	2	2	1	0
AT1G11050	594	708	674	761	1252	948	709	567	405	390	199	388	301	405	432	395
AT1G11055	0	0	0	0	0	1	0	0	0	0	0	0	0	0	0	0
AT1G11060	403	523	427	512	459	440	357	192	465	367	223	470	318	426	485	542
AT1G11070	15	19	26	20	75	87	44	59	37	24	16	24	97	67	129	143
AT1G11080	107	65	81	92	498	730	555	300	484	498	305	461	688	785	1029	926
AT1G11090	258	313	232	287	117	148	111	84	221	210	128	221	96	151	259	217
AT1G11100	143	214	162	168	118	158	132	70	197	154	100	179	109	130	110	145
AT1G11110	0	0	0	0	0	0	0	0	0	0	0	0	0	0	0	0
AT1G11112	9	8	6	5	1	1	3	2	19	6	7	7	2	2	8	4
AT1G11120	30	47	34	46	29	16	11	10	64	51	33	51	31	28	43	43
AT1G11125	32	32	20	42	18	10	18	10	48	43	29	56	19	24	26	34
AT1G11130	656	794	777	691	223	250	187	101	734	623	390	649	326	389	439	486
AT1G11145	0	0	0	0	0	0	0	0	0	0	0	0	0	0	0	0
AT1G11150.1	104	147	122	128	45	78	73	32	110	73	66	91	56	57	87	93
AT1G11160	147	94	124	140	32	56	31	30	205	146	105	228	90	90	65	103
AT1G11170	138	141	152	190	65	77	51	30	135	115	68	80	90	102	110	119
AT1G11175	143	198	157	175	262	234	311	132	128	130	80	94	227	237	396	393
AT1G11180	132	163	163	176	310	277	236	117	123	124	83	125	153	185	343	277
AT1G11185	170	291	220	194	696	625	551	184	73	92	49	96	168	219	289	311
AT1G11190	172	228	238	210	55	115	105	26	149	131	93	154	113	149	144	181
AT1G11200	246	351	338	344	435	344	281	183	288	205	176	290	192	266	292	313
AT1G11210	126	170	144	153	228	212	228	93	43	44	24	45	230	220	277	295
AT1G11220	67	64	65	69	27	26	22	10	87	55	35	58	50	52	68	70
AT1G11230	0	0	0	0	1	0	0	0	0	0	0	0	2	0	0	0
AT1G11240	744	704	659	715	831	596	427	193	748	685	375	696	506	625	821	720
AT1G11250	5	3	4	7	3	4	2	0	8	3	1	3	4	1	3	3
AT1G11260	1149	1221	1600	1715	8608	8932	10899	4739	1854	1682	970	1721	8977	6044	21185	18337
AT1G11270	86	129	94	108	132	92	106	80	106	104	60	107	89	102	175	149
AT1G11265.1	0	0	0	0	0	0	0	0	0	0	0	0	0	0	0	0
AT1G11280	625	726	604	703	327	259	233	117	798	681	376	741	390	443	568	573
AT1G11290	90	105	85	97	65	54	38	30	89	86	59	85	49	77	82	104
AT1G11300	418	570	459	476	220	136	143	63	261	251	126	245	159	204	235	273
AT1G11310	2769	3774	3716	3856	5139	4786	3435	2327	3334	3041	1602	2862	1752	2384	2558	3415
AT1G11320	69	134	82	130	57	53	35	24	111	89	43	82	44	63	84	64
AT1G11330	654	1189	935	1457	1019	938	634	442	696	524	331	594	279	679	452	750
AT1G11340	23	44	39	44	21	26	17	8	68	31	16	44	13	21	52	49
AT1G11350	562	637	541	562	330	311	236	124	574	449	241	563	200	260	464	612
AT1G11360	531	675	542	649	530	506	402	246	652	495	341	636	446	535	745	897
AT1G11362	0	0	0	0	9	5	5	3	1	0	1	0	1	0	6	1
AT1G11370	0	0	0	1	1	1	0	0	0	0	0	0	0	0	0	0
AT1G11380	159	211	184	214	364	321	242	182	267	237	160	247	335	327	544	495
AT1G11390	441	464	476	514	505	410	307	210	507	436	269	504	338	451	554	511
AT1G11400	457	580	476	521	620	517	461	257	565	457	222	521	452	521	822	711
AT1G11410	498	704	502	492	160	186	206	62	391	349	171	406	134	198	224	247
AT1G11420	129	155	135	174	80	76	55	41	154	123	86	169	101	147	154	140
AT1G11430	1240	1291	1088	1278	609	680	666	202	1445	1402	821	1266	633	800	1494	1181
AT1G11440	270	290	302	339	167	183	150	127	281	274	157	292	175	227	367	320
AT1G11450	106	133	126	127	36	46	38	24	214	172	113	168	76	97	136	171
AT1G11460	5	1	5	16	2	2	0	0	35	21	23	30	9	11	19	16
AT1G11470	0	0	0	0	0	0	0	0	0	0	0	0	0	2	0	0
AT1G11475	278	343	307	319	263	183	112	69	303	210	174	289	139	210	289	234
AT1G11480	1385	1859	1630	1786	2595	2265	1979	973	1651	1486	816	1647	1593	1970	2697	2552
AT1G11482	3	5	2	5	5	1	2	2	12	4	8	11	4	2	4	5
AT1G11490	12	6	9	9	5	7	2	4	12	7	5	14	10	16	9	4
AT1G11500	6	14	5	6	11	9	2	5	6	6	3	9	10	8	9	6
AT1G11510	0	0	0	0	0	0	0	0	0	0	0	0	0	0	0	0
AT1G11520	0	0	0	0	0	0	0	0	0	0	0	0	0	0	0	0
AT1G11530	116	152	150	138	267	282	283	64	163	155	106	141	199	273	533	532
AT1G11540	184	267	297	281	227	245	170	142	280	290	141	292	97	129	116	209
AT1G11545	353	246	347	447	80	40	35	35	868	839	441	954	276	370	256	513
AT1G11550	0	0	0	0	0	0	0	0	0	0	0	0	0	0	0	0
AT1G11560	1	2	1	1	0	0	1	0	1	4	2	1	0	0	2	2
AT1G11570	11	16	13	28	20	13	16	6	17	12	10	28	13	19	20	31
AT1G11572	1	0	3	0	2	1	2	1	1	2	0	0	1	0	1	0
AT1G11580	16015	24354	18341	18096	12484	12955	11941	6167	18289	16892	9578	16768	5910	11063	9930	11413
AT1G11590	0	0	0	0	0	0	0	0	0	0	0	0	0	0	0	0
AT1G11592	187	256	199	239	257	240	215	159	191	202	123	218	210	203	330	283
AT1G11593	0	0	0	0	0	0	0	0	0	0	0	0	0	0	0	0
AT1G11595	0	0	0	0	0	0	0	0	0	0	0	0	0	0	0	0
AT1G11600	300	287	150	299	37	36	71	27	303	239	93	224	80	100	124	107
AT1G11608	0	0	0	0	2	0	0	0	0	0	0	0	0	0	0	0
AT1G11610	0	0	0	0	3	0	1	0	0	0	0	0	0	0	0	0
AT1G11620	0	0	0	0	0	1	0	0	0	0	0	0	0	1	0	0
AT1G11630	219	251	182	235	197	158	112	86	202	173	118	182	122	175	235	239
AT1G11640	0	0	0	0	0	0	0	0	0	0	0	0	0	0	0	0
AT1G11650	4307	5259	5033	4911	6032	5528	4692	1693	4333	3720	2076	4039	3246	4386	6648	5796
AT1G11655	6	4	4	13	2	0	0	2	17	16	4	25	8	6	4	11
AT1G11660	1070	1373	1262	1302	1082	968	787	358	1330	1142	783	1214	858	1037	1276	1375
AT1G11670	870	954	1053	966	877	687	489	419	1048	934	664	1126	822	977	799	1130
AT1G11680	3153	4100	3583	3787	2173	1891	1579	1140	4594	4510	2552	4695	1880	2685	2804	3293
AT1G11684	0	0	0	0	0	0	0	0	0	0	1	2	0	0	0	0
AT1G11690	1	1	0	0	0	0	0	0	3	0	1	3	1	0	0	0
AT1G11700	300	649	329	394	27	46	52	9	283	215	79	294	34	58	63	68
AT1G11710	79	114	80	85	81	58	31	31	93	87	51	95	66	62	76	84
AT1G11720	1958	2612	1796	1912	704	795	983	315	1622	1248	812	1404	907	1371	2306	1736
AT1G11730	57	72	45	75	24	15	23	3	64	62	25	64	24	27	48	37
AT1G11735	1	3	5	1	2	3	1	0	2	5	2	6	0	0	0	4
AT1G11740	24	20	16	35	10	14	8	3	60	48	29	68	46	51	44	65
AT1G11750	1507	1758	1320	1731	1098	1130	1325	698	1715	1514	797	1581	1128	1478	2538	2146
AT1G11755	204	284	209	223	166	148	109	48	186	158	114	203	123	159	236	247
AT1G11760	98	125	102	112	122	85	84	38	108	104	45	88	68	113	155	118
AT1G11765	0	0	0	0	0	0	0	0	0	0	0	0	0	0	0	0
AT1G11770	0	0	0	0	0	0	0	0	0	0	0	0	0	0	0	0
AT1G11780	220	242	263	305	196	155	98	51	257	228	132	238	134	179	252	211
AT1G11785	7	11	11	12	5	6	5	6	3	4	4	2	3	3	3	11
AT1G11790	463	526	425	508	318	277	241	145	503	363	254	392	246	402	418	324
AT1G11800	143	178	187	177	114	112	79	52	132	147	88	129	95	112	192	152
AT1G11803	0	0	0	0	0	0	0	0	0	0	0	0	0	0	0	0
AT1G11806	0	0	0	0	0	0	0	0	0	0	0	0	0	0	0	0
AT1G11810	0	0	1	1	0	0	0	0	0	0	0	0	0	0	0	0
AT1G11820	642	634	562	660	359	375	311	189	889	720	482	809	323	430	978	750
AT1G11840	18824	24327	18771	19228	7513	7398	7519	2698	16330	12550	7837	15297	8406	14411	16034	16418
AT1G11850	191	189	83	213	84	71	65	32	317	246	138	240	76	88	157	150
AT1G11860	14596	16347	13314	16917	4170	4814	5737	2118	19093	16291	8866	18545	7208	8949	14658	13800
AT1G11870	466	529	411	472	357	328	317	163	649	471	345	534	356	430	785	575
AT1G11880	113	143	130	133	84	89	67	40	115	110	71	97	81	87	141	161
AT1G11890	785	849	775	964	698	720	502	306	697	589	411	680	501	713	758	709
AT1G11900	51	84	58	83	54	56	44	13	53	65	34	59	26	44	85	66
AT1G11905	201	251	257	245	302	263	178	76	199	177	100	197	174	218	303	266
AT1G11910	12237	15815	15979	14023	12494	15508	13844	5813	11219	10150	5500	11109	9182	12560	15878	17856
AT1G11915	14	24	14	21	13	11	9	9	32	21	23	16	26	23	21	29
AT1G11920	3	15	5	3	9	7	4	0	16	16	8	21	11	27	19	17
AT1G11925	7	35	13	10	691	481	377	369	5	0	1	1	7	21	16	25
AT1G11930	1252	1645	1314	1449	889	829	854	390	1150	915	464	1004	626	847	1215	1318
AT1G11940	135	185	143	204	121	94	92	56	143	93	76	121	95	159	163	143
AT1G11950	117	201	186	190	224	153	101	79	143	164	84	137	117	167	191	163
AT1G11960	347	495	425	396	448	515	404	178	308	308	174	277	254	350	407	379
AT1G11970	0	0	0	0	2	2	1	0	0	1	0	0	0	0	0	0
AT1G11980	0	1	0	1	2	3	3	2	0	0	0	0	0	0	0	0
AT1G11990	15	15	9	21	5	3	3	0	16	12	5	13	2	8	6	8
AT1G12000	2576	2754	2811	3004	1873	2009	1357	725	2716	2362	1458	2916	1585	2219	1857	2366
AT1G12010	901	1605	1459	1216	910	1163	842	489	866	670	427	801	996	854	1182	1492
AT1G12013	1	3	2	0	4	1	3	0	3	1	2	4	4	4	3	0
AT1G12015	0	1	0	0	0	0	0	0	2	0	0	1	0	0	0	0
AT1G12020	140	137	106	141	47	52	53	26	214	164	85	203	71	84	144	110
AT1G12030	50	108	21	24	13	3	4	1	17	9	2	11	7	2	2	5
AT1G12040	728	458	685	514	375	346	117	441	1277	1082	895	1623	990	1403	801	1469
AT1G12050	1216	1520	1314	1346	1260	1520	1406	459	926	723	440	800	828	1140	1598	1401
AT1G12060	86	88	74	85	28	30	33	16	93	52	39	89	47	46	52	63
AT1G12064	0	3	0	0	0	0	0	0	0	0	0	1	0	0	0	1
AT1G12070	1	5	3	4	4	4	3	5	5	10	1	13	4	8	11	6
AT1G12080	974	612	706	1102	3215	2704	2784	1790	3140	3288	1746	3611	3775	4454	4008	5046
AT1G12090	10585	11651	8281	7921	923	1129	2529	1454	11870	11405	7357	10546	3147	3523	8218	7507
AT1G12100	15	4	7	19	4	2	3	0	25	31	17	33	5	4	7	9
AT1G12110	4896	4506	6113	4989	984	1173	701	570	6188	6487	3852	7059	1963	2635	1510	2817
AT1G12120	1098	1289	1163	1301	1037	947	828	398	1294	1119	650	1268	981	1207	1778	1657
AT1G12130	4	3	4	6	8	7	1	1	3	2	1	5	5	5	5	8
AT1G12140	1094	1347	1315	1225	1075	1066	865	348	892	760	371	920	572	745	821	993
AT1G12150	18	9	25	30	12	16	3	7	41	34	14	56	35	47	38	48
AT1G12160	305	382	376	347	339	260	177	78	421	372	205	339	278	340	326	426
AT1G12170	0	0	0	0	0	0	0	0	0	0	0	0	0	0	0	0
AT1G12180	0	1	0	0	0	0	0	0	0	0	0	0	0	0	0	0
AT1G12190	0	0	0	0	0	0	0	0	0	0	0	0	1	1	1	0
AT1G12200	1132	1805	1519	1674	2113	2150	1508	1024	740	576	446	665	510	718	677	821
AT1G12210	71	98	141	120	105	77	56	39	63	60	38	79	64	71	63	135
AT1G12211	0	0	1	0	0	0	0	0	0	0	0	0	0	0	0	1
AT1G12220	258	350	335	370	456	386	306	173	236	194	109	165	214	328	418	496
AT1G12230	1334	1481	1361	1599	1385	1214	1209	709	1605	1259	898	1568	1268	1533	2147	2324
AT1G12240	2066	1806	2169	2410	1926	2369	2778	785	3055	2553	1650	3017	2332	2393	9287	4455
AT1G12244	153	180	118	152	77	85	84	31	157	147	86	151	94	107	166	178
AT1G12250	462	656	459	615	302	338	446	199	594	519	299	578	352	417	885	746
AT1G12260	118	122	122	112	37	46	42	15	97	71	39	84	46	72	72	103
AT1G12270	1112	1282	1195	1277	1008	828	660	475	1345	1139	704	1205	763	992	1313	1260
AT1G12280	294	478	285	384	115	174	132	66	280	207	136	258	146	216	284	327
AT1G12290	157	284	235	243	115	130	68	66	125	143	81	122	102	114	125	163
AT1G12294	8	15	4	8	3	2	1	0	6	8	3	4	3	5	7	5
AT1G12300	97	107	94	132	93	64	39	23	90	98	72	104	63	92	130	133
AT1G12310	1026	1154	1069	1214	851	719	583	345	1272	1043	605	1212	664	1031	1178	1116
AT1G12320	113	140	130	150	99	48	60	19	106	73	29	90	35	82	90	109
AT1G12330	427	428	312	375	92	116	155	65	388	309	211	386	105	126	286	233
AT1G12340	1	2	2	3	1	1	2	0	3	5	0	0	1	0	1	1
AT1G12350	294	382	326	366	287	275	267	117	273	271	179	303	244	247	389	361
AT1G12360	1516	1874	1790	1870	2854	2594	2278	1336	1626	1389	840	1520	1654	1896	2647	2689
AT1G12370	212	220	185	230	59	45	49	24	274	237	123	255	92	89	102	104
AT1G12380	476	637	524	584	127	113	106	61	505	401	250	417	125	211	299	252
AT1G12390	293	302	295	301	368	307	296	118	316	312	209	329	286	356	446	456
AT1G12400	173	190	181	184	117	107	93	57	128	100	89	122	84	114	132	144
AT1G12410	1827	2298	1719	2175	1505	1504	1648	704	2150	1707	1012	1730	1367	1684	2839	2600
AT1G12411	0	0	0	0	0	0	0	0	0	0	0	0	0	0	0	0
AT1G12420	289	335	357	317	174	102	96	59	308	316	190	305	221	281	245	280
AT1G12423	0	0	0	0	0	0	0	0	0	0	0	0	0	0	0	0
AT1G12430	827	991	725	873	406	437	373	195	942	764	495	926	363	415	604	658
AT1G12440	647	687	651	721	787	927	870	578	1027	910	491	970	882	971	2103	1765
AT1G12450	119	156	150	152	123	130	96	27	182	110	83	121	131	150	195	187
AT1G12451	0	0	0	0	0	0	0	0	0	0	0	0	0	0	0	0
AT1G12460	295	308	252	311	129	88	75	40	338	298	181	324	69	143	163	171
AT1G12470	1246	1529	1343	1390	998	1087	886	392	1336	1054	698	1260	768	997	1273	1236
AT1G12480	95	172	78	113	57	75	65	18	104	80	34	93	29	41	98	89
AT1G12490	0	2	0	1	0	1	0	0	1	0	0	0	1	0	1	2
AT1G12500	841	778	851	876	528	433	393	339	1208	1210	807	1230	513	567	772	827
AT1G12510	0	0	0	0	1	0	0	0	0	0	0	0	0	0	0	0
AT1G12520	566	743	853	829	1236	1067	1019	464	756	761	406	762	593	686	919	1011
AT1G12530	356	337	379	389	249	249	214	113	327	318	154	301	208	240	327	366
AT1G12540	0	0	0	0	0	0	0	0	0	0	0	0	0	0	1	0
AT1G12550	128	150	124	131	39	52	45	28	112	106	59	116	33	59	71	75
AT1G12560	105	88	95	130	193	176	60	114	257	188	107	292	267	379	252	452
AT1G12570	220	214	90	121	32	22	30	15	152	82	61	120	55	74	127	56
AT1G12580	778	1114	838	959	886	705	606	375	1024	847	503	906	664	831	1147	1176
AT1G12590	0	0	0	0	0	0	0	0	0	0	0	0	0	0	0	0
AT1G12600	9	16	19	17	19	25	9	11	15	20	13	17	11	14	19	28
AT1G12610	1	0	0	0	2	0	1	0	0	0	0	0	10	5	5	3
AT1G12620	141	164	151	168	102	98	83	50	167	134	102	158	94	84	150	157
AT1G12630	6	7	2	4	3	3	3	2	8	7	5	5	4	4	7	10
AT1G12640	618	856	785	750	1353	1472	1297	664	868	709	374	738	892	1024	1268	1214
AT1G12650	563	649	590	669	705	463	378	276	681	590	348	656	392	477	584	569
AT1G12660	0	0	0	0	0	0	0	0	0	0	0	0	0	0	0	0
AT1G12663	0	0	0	0	0	0	0	0	0	1	0	0	0	0	2	0
AT1G12665	0	0	0	0	0	0	0	0	0	0	0	0	0	0	0	0
AT1G12667	0	0	0	0	0	0	0	0	0	0	0	0	0	0	0	0
AT1G12669	0	0	0	0	0	0	0	0	0	0	0	0	0	0	0	0
AT1G12670	0	0	0	0	0	0	0	0	0	0	0	0	0	0	0	0
AT1G12672	2	7	3	2	0	0	0	0	5	1	0	4	0	0	0	1
AT1G12680	417	578	493	558	560	493	445	147	435	380	226	419	319	414	544	652
AT1G12700	82	116	88	103	54	69	67	38	104	99	63	86	76	73	126	115
AT1G12710	111	169	143	154	183	186	165	72	139	102	73	122	189	217	371	356
AT1G12720.1	0	0	0	0	0	0	0	0	0	0	0	0	0	0	0	0
AT1G12725.1	0	0	0	0	0	0	0	0	0	0	0	0	0	1	0	0
AT1G12730	89	123	100	139	114	98	102	23	127	110	66	101	91	118	214	192
AT1G12740	189	146	175	174	106	76	52	47	309	278	146	317	185	300	189	292
AT1G12750	365	509	370	509	308	279	286	120	443	363	204	413	186	287	361	321
AT1G12760	1049	1369	1331	1373	1896	1583	1295	700	1164	983	508	1111	882	1094	1471	1470
AT1G12770	685	722	647	735	492	415	473	252	884	797	478	784	519	599	944	909
AT1G12775	62	85	66	62	48	44	45	19	72	59	35	63	40	58	67	61
AT1G12780	684	835	828	867	1812	2694	3131	1033	848	729	409	704	2311	2007	5933	4420
AT1G12790	58	91	97	75	170	179	173	65	70	61	30	62	116	109	213	202
AT1G12800	3779	3883	3217	4025	1392	1605	1789	883	4679	4023	2570	4109	2166	2624	4246	3424
AT1G12805	547	768	465	510	75	101	68	74	924	863	406	676	70	100	69	179
AT1G12810	826	1087	925	910	553	582	519	380	1010	1050	593	872	435	514	836	727
AT1G12820	1008	1516	1138	1291	717	726	680	279	1055	977	528	1033	613	766	1002	1011
AT1G12830	380	411	348	408	330	263	204	111	412	398	214	409	242	324	324	307
AT1G12840	2333	3047	2491	2731	2069	1908	1587	985	2660	2216	1496	2706	1558	2251	2751	2613
AT1G12845	114	117	81	123	36	20	47	15	92	98	51	61	58	65	83	90
AT1G12850	782	892	758	903	567	570	506	329	848	735	470	885	539	626	851	844
AT1G12855	0	0	1	0	0	0	1	0	4	1	1	0	1	4	0	2
AT1G12860	493	530	359	426	169	243	298	114	705	522	336	552	230	220	584	529
AT1G12870	0	0	0	0	1	2	1	0	0	0	0	0	0	1	2	0
AT1G12880	116	270	127	195	200	193	158	68	103	84	40	102	81	134	187	194
AT1G12890	4	4	2	4	12	2	4	3	1	2	1	0	4	4	3	1
AT1G12900	15635	14792	13267	15889	2075	3373	4841	1971	20690	19131	11316	22171	7057	8179	15435	13659
AT1G12910	410	554	481	613	681	600	522	289	626	518	243	513	491	588	907	875
AT1G12920	2349	2517	2340	2450	2168	1698	1287	726	2712	2327	1298	2511	1485	2073	2445	2456
AT1G12930	580	793	553	700	462	430	389	175	736	553	330	640	405	510	686	750
AT1G12935.1	0	0	0	0	0	0	0	0	0	0	0	0	0	0	0	0
AT1G12938	0	0	0	0	0	0	0	0	0	0	0	0	0	0	0	0
AT1G12940	5	3	34	35	7	3	7	4	4	5	2	1	1	0	0	1
AT1G12950	214	188	176	237	214	125	74	86	286	175	113	281	260	465	318	360
AT1G12960	0	0	0	0	0	0	0	0	0	0	0	0	0	0	0	0
AT1G12970	249	260	286	288	380	287	272	182	251	232	131	264	211	323	386	368
AT1G12980	0	0	0	0	0	0	0	0	0	0	0	2	0	0	0	0
AT1G12990	399	570	451	569	314	299	214	117	501	408	230	360	281	413	419	507
AT1G13000	557	640	608	644	877	743	527	270	529	433	297	535	395	542	663	736
AT1G13010	0	0	0	0	0	0	0	0	0	0	0	0	0	0	0	0
AT1G13020	961	1214	1095	1255	927	698	570	311	1223	1019	535	1115	622	838	917	937
AT1G13030	295	302	242	292	155	134	92	58	346	277	143	310	121	129	224	195
AT1G13040	95	110	106	101	71	47	39	30	97	96	49	123	65	69	103	80
AT1G13050	72	82	62	86	83	56	63	33	102	86	45	76	44	80	85	102
AT1G13060	2291	2767	2432	2667	2288	2234	1790	874	2279	1891	1193	2334	1694	2293	2825	2686
AT1G13070	1	2	0	1	0	0	0	0	0	2	0	0	0	5	0	2
AT1G13080	743	1106	851	1110	603	1017	741	383	915	672	347	828	583	775	655	930
AT1G13090	1169	1504	1191	1284	484	604	723	154	787	660	371	697	436	534	810	947
AT1G13100	289	398	417	350	290	390	370	184	274	253	134	281	220	277	311	395
AT1G13110	2532	3416	3761	3168	3511	4447	3126	1488	1962	1754	921	1790	1020	1637	1510	2134
AT1G13120	503	675	501	564	419	387	344	210	618	466	288	499	329	461	575	525
AT1G13130	93	93	115	73	7	6	16	7	66	47	33	55	15	44	31	44
AT1G13140	0	0	0	0	0	0	0	0	0	1	0	0	0	0	1	0
AT1G13145	44	62	46	45	24	27	24	6	43	43	23	44	22	45	38	49
AT1G13150	0	0	0	0	0	0	0	0	0	0	0	0	0	0	0	0
AT1G13160	925	1035	968	1098	676	452	357	279	1128	961	620	1179	502	766	717	825
AT1G13170	825	924	744	968	596	504	371	265	992	885	480	891	637	766	912	983
AT1G13180	253	248	278	284	319	287	231	121	238	206	133	236	181	268	327	311
AT1G13190	905	1143	957	1014	1663	1282	1129	550	1074	865	583	957	1016	1237	2100	1598
AT1G13195	219	304	250	226	373	302	264	182	209	161	109	178	137	203	273	306
AT1G13200	0	1	0	0	2	0	0	0	1	1	1	0	0	2	0	0
AT1G13210	1531	1957	2105	2382	4462	3794	2836	1923	1405	1108	622	1083	1204	1863	1806	2201
AT1G13220	682	939	696	755	618	553	444	244	866	660	371	765	474	613	916	828
AT1G13230	0	7	2	6	11	13	4	3	3	2	2	7	4	4	10	13
AT1G13240	0	0	0	0	0	0	0	0	0	0	0	0	0	0	0	0
AT1G13245	617	733	665	814	966	1030	983	571	701	595	304	524	356	403	1123	868
AT1G13250	382	463	353	472	75	103	136	63	507	455	262	413	172	226	389	289
AT1G13260	506	604	917	919	2620	2911	2563	838	755	612	383	620	1514	1741	2407	2036
AT1G13270	316	345	351	432	361	435	371	147	440	374	245	343	407	463	774	687
AT1G13280	1125	1416	928	1119	618	601	613	324	1098	778	470	932	734	1151	1415	1282
AT1G13290	0	0	0	0	0	0	0	0	0	0	0	0	0	0	0	0
AT1G13300	643	588	811	797	543	513	469	389	1321	1407	707	1415	1115	1509	1171	1460
AT1G13310	9	14	17	27	7	5	4	2	8	11	2	4	14	9	16	13
AT1G13320	1194	1484	1363	1428	1253	1181	1099	554	1360	1208	792	1281	998	1216	1662	1519
AT1G13330	50	51	56	44	39	21	20	11	44	47	31	51	28	32	33	51
AT1G13340	276	492	475	454	427	349	254	115	319	266	207	269	150	248	172	264
AT1G13350	851	1032	860	962	1021	909	715	372	844	714	437	809	587	737	1016	1058
AT1G13360	1524	2217	2030	1903	1605	1795	1651	562	1317	1317	876	1278	900	1241	1423	1500
AT1G13370	8	4	9	11	2	1	5	0	5	9	1	4	1	3	8	3
AT1G13380	416	461	448	392	213	204	198	111	418	350	235	367	207	265	397	466
AT1G13390	541	723	573	573	764	552	461	326	495	398	292	487	313	515	656	582
AT1G13400	2	0	3	1	5	0	1	1	2	4	1	0	0	0	7	3
AT1G13410	37	35	29	45	28	31	15	11	42	25	20	48	36	40	36	33
AT1G13420	387	206	270	442	172	65	61	42	864	483	489	929	350	439	250	577
AT1G13430	13	33	21	44	6	2	3	2	67	56	36	79	38	52	34	54
AT1G13440	42332	59928	48085	49253	16099	15231	13051	5792	64541	55741	27957	61921	16811	26235	23347	30899
AT1G13448	70	102	78	72	10	15	18	4	99	55	31	65	8	19	20	52
AT1G13450	625	834	710	727	1134	962	850	599	800	698	452	715	836	867	1434	1495
AT1G13460	474	551	478	553	435	442	324	216	450	357	214	412	221	294	399	411
AT1G13470	75	163	362	545	336	165	44	150	48	32	8	16	32	147	23	104
AT1G13480	288	370	519	462	713	582	556	394	175	184	96	177	130	201	92	130
AT1G13485	0	0	0	0	0	0	0	1	0	0	0	0	0	0	0	0
AT1G13490	5	11	19	9	15	16	26	8	2	4	2	3	7	2	2	2
AT1G13500	28	36	47	28	23	29	19	19	28	20	21	36	17	23	16	29
AT1G13510	68	71	99	81	44	61	26	27	62	43	35	67	55	60	51	62
AT1G13520	157	421	351	254	499	378	356	144	111	84	59	84	135	220	106	122
AT1G13530	81	115	125	113	245	196	184	151	53	75	45	69	118	123	107	129
AT1G13540	28	35	50	67	58	73	46	37	34	45	28	48	38	56	26	35
AT1G13550	10	22	40	36	74	65	34	39	13	16	14	19	28	32	17	16
AT1G13560	1266	1279	1177	1332	911	897	777	346	1329	1151	688	1233	913	1101	1373	1329
AT1G13570	267	411	371	403	435	441	353	240	407	332	199	372	321	445	566	596
AT1G13580	196	209	216	231	179	160	117	63	202	188	95	222	137	190	214	179
AT1G13590	133	176	147	148	182	117	98	69	194	157	100	190	65	75	73	103
AT1G13600	66	78	90	103	38	42	33	19	75	91	76	117	47	69	75	104
AT1G13605	0	0	0	0	0	0	0	0	0	0	0	0	0	0	0	0
AT1G13607	0	0	0	0	0	0	0	0	0	0	0	0	0	0	0	0
AT1G13608	0	1	0	0	0	0	1	1	0	0	0	0	0	0	0	0
AT1G13609	0	0	0	1	0	0	0	0	0	1	0	0	0	0	0	0
AT1G13610	30	39	44	50	8	11	6	5	63	43	20	44	19	34	23	42
AT1G13620	14	13	8	10	8	8	1	7	30	19	11	27	17	30	20	16
AT1G13630	73	86	72	65	64	44	30	32	86	62	48	82	49	65	81	60
AT1G13635	108	96	116	99	20	19	10	8	104	85	64	97	66	48	55	88
AT1G13640	549	684	595	643	585	587	464	263	822	787	409	876	556	624	911	929
AT1G13650	527	236	553	534	4	12	47	8	902	927	559	972	43	28	59	91
AT1G13660.1	0	0	0	0	0	0	0	0	0	0	0	3	0	0	0	0
AT1G13670	100	98	113	146	109	87	69	75	272	267	171	315	156	185	255	272
AT1G13680	3	0	1	0	2	0	0	0	2	2	0	0	1	1	0	0
AT1G13690	313	408	297	369	281	221	197	80	319	295	127	332	220	251	346	312
AT1G13700	58	62	108	105	134	173	117	65	139	91	53	114	132	144	269	350
AT1G13710	13	28	20	13	25	7	14	4	35	36	34	35	21	43	65	18
AT1G13720	0	0	0	0	0	0	0	0	0	0	0	0	0	0	0	0
AT1G13730	743	722	680	810	490	344	275	175	891	831	458	939	519	589	631	630
AT1G13740	217	293	233	232	320	241	166	128	221	177	105	198	207	261	294	244
AT1G13750	351	465	417	487	227	262	205	95	273	252	113	233	205	300	254	376
AT1G13755	0	0	1	0	0	0	0	0	0	0	0	0	0	0	0	0
AT1G13760	0	0	0	0	2	0	0	1	0	0	0	0	0	0	0	0
AT1G13770	221	310	244	264	174	185	151	100	244	196	137	236	150	179	228	258
AT1G13780	88	149	88	121	143	140	103	63	135	98	57	110	117	117	197	131
AT1G13790	96	88	56	86	26	25	30	12	90	64	36	64	17	50	69	46
AT1G13800	56	40	27	40	34	29	6	5	67	62	22	51	24	35	25	25
AT1G13810	112	149	112	115	116	80	49	28	133	122	66	125	69	118	116	106
AT1G13820	631	701	709	804	317	312	391	166	784	708	440	725	404	513	899	709
AT1G13830	149	167	176	211	45	52	34	21	111	128	69	174	43	88	55	105
AT1G13840	0	0	0	0	0	0	0	0	0	0	0	0	0	0	0	0
AT1G13850	0	0	0	0	0	0	0	0	0	0	0	0	0	0	0	0
AT1G13860	498	650	513	589	163	187	186	82	457	425	283	484	244	329	443	410
AT1G13870	266	323	289	327	272	275	186	113	325	273	150	328	154	208	327	241
AT1G13880	513	603	556	649	622	561	456	246	593	505	304	587	435	560	735	763
AT1G13890	0	0	0	0	0	0	0	0	0	0	0	0	5	2	0	0
AT1G13900	656	820	705	787	509	481	419	219	722	629	356	657	414	595	723	710
AT1G13910	109	220	156	178	250	276	238	101	120	95	79	107	89	169	159	160
AT1G13920	73	141	83	119	172	145	101	42	117	116	44	114	91	103	118	149
AT1G13930	9825	15552	9114	8365	3340	4148	5188	2212	6722	5785	2918	6047	6514	9736	11075	7859
AT1G13940	513	747	576	660	478	524	414	204	572	501	308	585	430	520	782	703
AT1G13950	261	269	279	302	198	198	138	99	279	270	183	268	217	272	227	327
AT1G13960	550	706	672	667	1190	1137	930	506	550	491	318	505	683	887	1207	1016
AT1G13970	223	231	228	204	58	60	45	26	352	308	193	337	128	190	151	226
AT1G13980	1266	1752	1372	1635	1322	1437	1187	565	1464	1285	729	1401	1213	1584	2337	2176
AT1G13990	749	1248	1015	962	3004	2979	2736	725	425	312	172	331	1111	1742	2634	1821
AT1G14000	1317	1681	1550	1836	2221	1950	1639	912	1411	1113	716	1252	1135	1628	1873	1832
AT1G14010	842	970	1035	1055	1015	797	613	504	804	716	364	842	551	778	798	873
AT1G14020	293	362	316	382	284	188	187	118	362	350	191	419	206	304	362	339
AT1G14030	475	485	451	498	232	247	321	122	653	558	324	568	325	328	587	659
AT1G14040	597	831	802	712	2945	2054	1577	1200	492	374	268	440	464	595	628	750
AT1G14048	0	0	0	1	0	0	0	0	0	0	0	0	0	2	0	0
AT1G14060	371	355	348	397	359	215	147	135	444	379	199	421	222	294	218	249
AT1G14070	183	201	227	215	203	156	105	88	158	130	100	160	52	83	62	97
AT1G14071	2	12	4	2	7	4	4	2	8	4	1	6	9	2	8	14
AT1G14080	211	215	317	240	136	122	78	46	282	235	133	303	180	201	138	207
AT1G14090	132	130	136	120	134	79	83	35	131	114	85	131	94	134	166	175
AT1G14100	2	2	0	0	0	1	0	1	1	1	1	1	0	1	2	1
AT1G14110	0	0	0	0	0	0	0	0	0	0	0	0	0	0	0	0
AT1G14120	1041	982	1256	1139	616	523	687	282	647	466	377	761	360	750	583	767
AT1G14130	220	252	332	254	227	242	185	72	173	158	107	184	151	206	324	314
AT1G14140	170	233	204	210	281	199	143	62	216	185	109	235	161	196	269	271
AT1G14150	759	966	701	772	100	150	229	102	821	727	476	783	303	271	606	619
AT1G14160	207	319	329	252	97	105	59	67	194	205	133	268	156	156	155	220
AT1G14170	649	837	834	807	1517	1361	1074	491	600	550	352	694	469	606	528	698
AT1G14180	136	117	90	149	72	48	43	24	149	113	63	108	66	65	106	100
AT1G14182	1	1	0	1	8	2	3	0	0	0	1	1	3	2	4	4
AT1G14185	95	69	68	50	50	53	32	31	163	176	130	244	125	128	135	147
AT1G14190	122	120	138	122	17	15	12	13	113	95	55	100	62	77	79	100
AT1G14200	109	214	173	194	451	380	334	204	140	146	75	137	174	236	261	318
AT1G14205	38	29	43	28	34	37	48	17	51	53	23	46	31	39	68	86
AT1G14210	659	778	890	911	410	410	296	218	809	642	510	847	403	569	525	771
AT1G14220	46	34	31	58	85	75	39	46	67	32	47	61	66	61	49	73
AT1G14225	0	0	0	0	1	0	0	0	0	0	0	0	0	0	0	0
AT1G14230	659	820	816	898	853	900	685	391	678	505	378	593	628	810	873	967
AT1G14240	520	544	546	718	321	336	347	150	713	363	330	583	503	809	671	954
AT1G14250	1910	1168	1327	3415	400	614	906	553	3866	2998	2215	3207	1031	2534	6173	4182
AT1G14260	46	49	51	60	100	78	63	32	37	51	22	57	23	44	38	52
AT1G14270	505	606	482	606	356	357	364	136	709	616	357	663	374	493	948	759
AT1G14280	537	725	405	538	87	116	199	54	624	497	270	553	168	175	605	699
AT1G14290	643	576	609	650	477	362	361	349	1121	1005	763	1000	555	626	1244	1215
AT1G14300	320	351	290	349	343	260	180	111	351	329	218	353	200	291	383	367
AT1G14310	221	244	201	230	163	150	133	81	204	208	109	209	161	163	231	206
AT1G14315	0	0	1	0	0	0	0	0	0	0	0	0	3	0	0	0
AT1G14320	8972	8626	9668	10017	7986	5515	4142	2498	10271	9104	5140	10006	5488	7714	7846	8028
AT1G14330	286	440	364	433	879	600	491	288	349	271	174	321	273	358	381	414
AT1G14340	311	484	398	428	236	289	234	83	350	286	161	333	183	274	323	398
AT1G14345	969	1100	775	970	189	310	364	194	1173	1030	690	1114	389	380	871	741
AT1G14350	352	508	381	459	223	188	164	99	373	345	190	306	188	307	297	316
AT1G14360	533	580	660	812	1290	908	538	323	450	384	282	461	275	569	410	442
AT1G14370	485	599	695	659	1097	1067	718	490	315	262	165	322	239	401	399	459
AT1G14380	744	895	831	927	460	495	391	243	994	834	485	848	610	716	861	1010
AT1G14390	64	49	70	81	38	26	22	15	142	127	78	128	95	117	80	137
AT1G14400	1882	2750	2266	2376	2478	2610	2320	1024	2184	1959	1088	2207	1812	2218	3345	3255
AT1G14410	385	384	333	411	188	201	150	66	433	381	197	381	148	238	324	336
AT1G14420	0	2	1	3	0	1	1	0	0	0	0	1	2	0	0	0
AT1G14430	47	37	12	42	20	11	8	3	104	95	39	94	13	20	29	24
AT1G14440	177	196	98	176	47	57	62	34	221	166	86	167	69	79	134	123
AT1G14450	866	969	845	893	778	698	541	430	799	823	408	943	551	710	833	933
AT1G14455	6	13	6	16	5	1	2	4	4	11	5	4	3	3	5	8
AT1G14460	535	608	491	721	312	340	284	140	680	559	348	581	309	398	476	471
AT1G14470	28	28	28	22	24	24	27	19	41	40	14	30	24	28	33	30
AT1G14480	47	62	85	84	41	30	29	21	69	46	27	51	45	51	53	52
AT1G14490	23	22	19	28	2	2	3	1	18	11	11	10	9	5	10	9
AT1G14500	4	3	4	7	4	2	1	2	8	7	2	4	4	6	3	4
AT1G14510	733	968	863	966	1257	1044	798	442	838	704	442	819	615	761	1209	1052
AT1G14518	0	0	0	0	0	0	0	0	0	0	1	0	0	0	0	0
AT1G14520	124	250	109	117	19	33	47	13	98	53	41	91	33	45	120	79
AT1G14530	117	170	128	145	218	178	191	60	160	106	77	137	155	185	277	214
AT1G14540	313	364	498	522	2194	1857	1667	1159	88	50	28	27	229	375	151	122
AT1G14549	0	0	0	0	0	0	0	0	0	0	0	0	0	0	0	0
AT1G14550	189	246	319	286	807	737	667	406	30	13	8	9	56	146	38	34
AT1G14560	324	431	373	402	374	315	271	98	376	317	171	334	198	342	413	383
AT1G14570	1199	1490	1286	1415	1204	1236	1031	504	1426	1248	672	1397	979	1220	1647	1567
AT1G14580	508	506	388	494	133	162	201	102	499	404	236	375	171	266	512	395
AT1G14590	117	205	113	189	94	80	68	43	125	104	71	113	88	106	181	117
AT1G14600	99	126	100	106	43	29	32	15	61	49	27	55	20	27	29	49
AT1G14610	3370	3979	3561	3938	2722	2643	2230	1150	4293	3902	2200	4069	2574	3267	4097	3730
AT1G14620	477	525	527	566	469	360	239	172	732	622	365	750	326	469	533	578
AT1G14630	96	92	101	126	15	8	11	11	113	118	53	115	25	38	59	67
AT1G14640	161	213	196	233	566	308	261	228	116	105	78	136	109	166	210	190
AT1G14642	14	16	3	22	37	31	18	18	8	5	6	6	20	9	21	14
AT1G14650	1771	2299	1886	2074	2093	1698	1365	846	2129	1699	1021	1845	1240	1535	2164	2032
AT1G14660	159	201	150	175	123	118	118	60	152	140	64	122	73	123	147	168
AT1G14670	2825	3025	2691	3046	2845	2227	1736	1262	3119	2794	1766	3192	2352	2923	3464	3588
AT1G14680	31	28	27	22	27	20	15	18	33	29	10	23	17	31	29	31
AT1G14685	540	622	633	678	793	763	628	337	690	586	318	577	575	671	1003	928
AT1G14686	1	2	4	0	0	2	2	0	0	2	1	2	0	0	1	2
AT1G14687	15	12	13	21	6	5	6	6	16	12	4	11	3	7	14	9
AT1G14688	0	0	0	0	1	0	0	0	0	0	0	0	0	1	0	0
AT1G14690	1115	1419	1108	1233	836	929	708	363	1084	888	449	1015	677	810	1229	1312
AT1G14700	141	204	120	205	28	64	103	34	250	227	150	224	90	78	296	266
AT1G14710	2057	2100	2048	2136	1395	1068	925	750	2375	2143	1301	2249	1191	1461	2018	1966
AT1G14720	642	679	781	723	435	436	337	240	920	836	496	780	423	587	819	793
AT1G14730	265	312	312	293	138	136	93	58	327	270	170	323	296	349	439	418
AT1G14740	2050	2807	2460	2727	3618	2934	2317	1470	2673	2394	1433	2625	1832	2318	3142	3346
AT1G14750	45	38	30	39	30	22	11	6	44	45	24	42	20	31	36	43
AT1G14755	0	0	0	0	0	0	0	0	0	0	0	0	0	0	0	0
AT1G14760	0	0	1	1	1	0	0	1	0	0	0	3	0	0	2	0
AT1G14770	139	180	109	131	84	68	67	40	166	114	76	130	69	83	139	152
AT1G14780	199	220	303	293	174	170	124	107	182	199	113	229	209	306	252	292
AT1G14790	447	771	521	773	214	287	269	105	478	319	213	354	260	385	448	680
AT1G14800	0	0	0	0	0	0	0	0	0	0	0	0	0	0	0	0
AT1G14810	1238	1204	1198	1286	1434	1188	848	493	1656	1605	872	1713	821	1055	1569	1265
AT1G14820	215	311	247	287	158	143	116	94	195	164	105	217	145	157	250	235
AT1G14830	2206	2275	2144	2311	2048	1950	1388	636	2332	1990	1193	2381	1583	2179	2203	2322
AT1G14840	696	809	523	623	213	210	219	94	665	558	280	578	229	262	506	468
AT1G14850	1112	1360	1101	1218	1150	928	823	471	1378	1208	727	1362	862	1047	1311	1247
AT1G14860	219	259	262	251	602	603	518	310	269	232	154	310	440	521	550	558
AT1G14870	3323	6146	4881	4583	17528	16974	17144	8427	3293	3180	1792	3351	3012	3951	3274	4138
AT1G14880	118	112	1410	1192	168	46	34	9	74	46	7	25	62	847	15	126
AT1G14890	439	792	711	585	722	754	755	256	313	208	169	268	410	555	791	750
AT1G14900	602	708	613	739	557	463	356	271	825	767	401	844	510	614	603	716
AT1G14910	925	1218	956	1146	873	890	747	374	1082	892	510	1020	702	842	1258	1156
AT1G14920	743	860	590	744	338	400	340	155	830	708	420	785	344	444	766	959
AT1G14930	0	0	0	0	4	5	3	1	1	0	0	0	0	0	1	3
AT1G14940	0	0	0	0	0	0	0	0	0	0	0	0	0	1	0	0
AT1G14950	0	0	0	0	0	2	0	0	0	0	0	0	0	0	0	0
AT1G14960	205	60	145	169	94	89	26	37	401	169	166	422	211	186	156	309
AT1G14970	237	220	182	242	131	104	76	49	250	212	97	214	121	141	202	188
AT1G14980	1709	1588	1697	1975	1080	792	527	220	2035	1709	862	2088	999	1471	1254	1517
AT1G14990	170	218	209	209	131	117	107	61	152	138	77	164	115	128	181	189
AT1G15000	414	349	345	392	183	172	157	55	341	350	204	379	177	201	311	317
AT1G15002	4	9	10	3	2	3	3	0	14	9	7	8	4	5	1	5
AT1G15010	10	31	30	31	176	228	135	42	9	3	2	7	101	82	388	128
AT1G15015	0	0	0	0	0	1	0	0	0	0	0	0	0	0	0	0
AT1G15020	605	605	602	571	733	635	508	287	561	465	294	542	462	599	837	869
AT1G15030	668	847	767	904	1090	1003	686	563	752	679	440	714	505	707	963	970
AT1G15040	349	665	463	588	10168	11381	10151	5320	235	171	85	275	2966	2877	4015	3568
AT1G15045	0	0	0	0	0	0	1	0	0	0	0	0	0	0	0	0
AT1G15050	5	16	11	8	17	22	20	7	7	9	3	8	15	10	13	13
AT1G15060	568	930	615	801	547	593	493	241	671	509	309	538	434	474	700	716
AT1G15080	78	74	75	106	25	18	36	9	78	61	51	69	45	48	67	63
AT1G15090	0	0	0	0	0	0	0	0	0	0	0	0	0	0	0	0
AT1G15100	498	688	536	544	564	471	345	322	808	666	460	791	497	541	362	556
AT1G15110	514	699	580	610	1239	978	668	393	577	517	315	579	472	618	658	669
AT1G15120	1821	2067	2153	2346	2244	1887	1447	1269	2200	2036	1329	2383	1384	1995	2012	2412
AT1G15125	1249	515	1089	524	14525	14429	5030	3947	302	328	162	241	457	688	1045	1972
AT1G15130	1932	2475	2397	2312	2333	2409	2295	1078	2052	1675	1010	1906	1688	2179	3010	2898
AT1G15140	1262	1230	1141	1163	1043	810	727	549	1292	1214	830	1140	630	937	1374	874
AT1G15150	14	23	19	9	2	3	1	0	6	11	5	8	2	5	6	2
AT1G15160	1	0	0	1	0	1	1	0	1	0	1	0	2	0	1	2
AT1G15165	95	136	111	123	71	84	83	33	131	135	86	125	53	84	109	121
AT1G15170	298	455	381	388	477	544	456	265	235	240	154	284	214	243	254	264
AT1G15175	33	27	44	41	25	21	36	9	80	44	26	53	34	25	66	79
AT1G15180	416	418	370	445	187	303	343	169	459	411	250	404	295	294	756	731
AT1G15190	11	5	20	6	14	1	3	6	5	8	4	9	10	9	4	8
AT1G15200	1419	1703	1379	1506	1348	1074	868	450	1548	1376	778	1418	990	1163	1571	1399
AT1G15210	2628	2965	3343	3347	963	982	644	584	4147	3767	2447	4535	2328	2935	2244	3568
AT1G15215	186	214	159	194	113	114	101	67	183	153	89	159	96	118	173	196
AT1G15220	104	107	96	100	92	80	70	22	85	81	58	89	77	85	129	123
AT1G15230	495	691	539	556	751	609	634	314	515	385	273	431	452	508	709	692
AT1G15240	1062	1426	1097	1277	1157	1244	1070	509	910	854	479	862	807	1071	1645	1419
AT1G15250	199	214	208	247	140	94	67	39	232	278	138	241	93	159	154	186
AT1G15260	488	740	375	419	55	103	116	54	473	361	251	451	68	103	183	295
AT1G15270	2874	3432	3326	3204	2325	2096	1801	956	2927	2566	1395	2977	1827	2534	2993	3128
AT1G15280	1291	1727	1464	1598	1488	1375	1177	635	1491	1238	782	1419	1153	1551	2048	1848
AT1G15290	3125	3770	2938	3544	1461	1896	1960	814	3693	3148	1789	3339	1894	2200	4557	3716
AT1G15300.1	72	90	79	84	81	71	52	27	51	55	28	61	39	52	67	83
AT1G15310	236	308	224	217	86	102	109	38	127	101	58	110	84	124	164	127
AT1G15320	1	0	0	1	2	3	1	1	0	2	1	1	1	1	4	3
AT1G15330	7	7	9	9	413	327	214	114	15	6	5	17	163	144	337	194
AT1G15340	2388	2814	2166	2409	2176	2181	2146	946	2612	2063	1187	2224	1950	2353	3638	3176
AT1G15350	400	544	439	490	972	857	793	433	576	525	256	529	556	644	1046	1064
AT1G15360	0	2	0	2	0	0	0	0	0	0	1	3	1	3	5	2
AT1G15370	632	804	714	761	598	693	497	277	663	514	349	664	480	580	812	741
AT1G15380	1021	1249	1566	1433	3667	4672	4959	1512	1212	1323	940	1315	3010	2791	3958	3748
AT1G15385	10	12	11	24	49	17	39	25	11	14	4	14	12	17	11	16
AT1G15390	306	300	283	304	295	210	187	101	351	337	193	384	243	317	450	403
AT1G15400	793	1110	905	1007	1344	1062	958	531	934	814	390	901	820	913	1281	1279
AT1G15405	270	415	443	295	246	299	169	22	471	435	155	359	351	339	103	430
AT1G15410	493	696	466	567	173	172	141	92	618	457	273	579	174	192	324	302
AT1G15415	38	65	40	46	321	190	101	65	17	8	7	7	19	33	21	18
AT1G15420	517	636	515	612	393	249	193	147	713	658	365	681	300	407	461	474
AT1G15430	157	222	248	212	871	451	316	186	190	148	82	158	193	356	350	238
AT1G15440	838	922	785	878	519	389	258	240	1109	952	560	979	415	619	634	642
AT1G15450	0	0	0	0	0	0	0	0	0	0	0	0	0	0	0	0
AT1G15460	60	42	62	76	33	22	8	6	63	66	51	82	85	69	55	78
AT1G15470	402	423	379	414	298	264	194	104	381	341	170	391	225	308	344	322
AT1G15480	314	340	254	330	203	144	104	83	415	412	214	392	169	208	217	268
AT1G15490	323	391	350	387	282	255	226	169	338	337	170	342	244	292	399	339
AT1G15500	4489	5955	4878	5090	3246	3459	2931	1411	5025	4480	2542	4763	2536	3265	4712	4406
AT1G15510	163	165	158	176	51	78	39	16	173	141	100	142	53	81	95	74
AT1G15520	168	77	475	330	9165	2681	744	714	12	14	5	12	90	337	154	166
AT1G15530	288	326	282	322	722	540	423	366	324	260	148	234	219	288	386	332
AT1G15540	19	13	16	24	113	31	8	4	62	41	34	71	30	17	4	41
AT1G15550	134	205	158	142	32	70	154	42	197	191	110	194	183	199	285	251
AT1G15560.1	1	0	0	0	0	0	1	0	0	0	0	0	0	0	0	0
AT1G15570	314	275	269	392	245	175	207	104	450	367	228	434	250	255	494	393
AT1G15580	21	14	22	10	6	0	3	1	12	13	6	10	3	4	9	5
AT1G15590	0	0	0	0	0	0	0	0	0	0	0	0	0	0	0	0
AT1G15600	0	0	0	0	0	0	0	0	0	0	0	0	0	2	0	1
AT1G15610	0	0	2	5	0	1	3	0	1	10	4	3	5	6	9	4
AT1G15620	4	1	0	0	0	0	1	1	4	2	2	1	0	2	2	0
AT1G15630	9	6	9	18	10	1	6	0	19	25	13	17	18	28	19	15
AT1G15640	15	11	18	12	22	9	5	2	21	24	18	35	17	32	26	30
AT1G15650	0	0	0	0	0	0	0	0	0	0	0	0	0	0	0	0
AT1G15660	415	406	346	472	295	259	261	161	509	399	250	475	322	319	481	457
AT1G15670	787	1117	1166	1022	2354	2401	1762	732	685	671	376	790	801	1201	1147	1272
AT1G15680	0	0	0	0	0	0	0	0	0	0	0	0	0	0	0	0
AT1G15690	11371	12352	11880	11977	12814	13023	12225	4400	12878	11569	6916	13073	9116	10825	18199	14735
AT1G15700	164	215	117	158	123	124	104	45	220	176	91	181	109	140	183	183
AT1G15710	436	530	463	497	265	235	182	182	472	393	288	460	209	280	363	336
AT1G15720	97	109	65	95	82	45	40	32	106	80	53	87	60	62	97	85
AT1G15730	607	568	506	612	390	499	556	201	709	617	370	636	515	583	1160	1057
AT1G15740	1318	1876	1818	1924	3319	3912	3845	2026	1683	1370	825	1422	2742	2746	4462	4991
AT1G15750	3454	4512	3968	4275	4026	4298	3239	1508	4143	3469	2064	3930	2895	3797	5261	4772
AT1G15757	0	0	0	0	0	0	0	0	0	0	0	0	0	0	0	0
AT1G15760	35	42	34	54	17	7	7	5	37	37	20	35	15	25	20	27
AT1G15770	1	0	1	1	0	0	0	0	1	0	0	0	0	0	0	0
AT1G15772	4	10	7	7	1	2	1	1	3	4	2	5	3	5	1	4
AT1G15780	1645	2224	1969	2004	1755	1957	1554	1015	1579	1372	899	1602	1073	1432	1884	1740
AT1G15790	136	212	214	245	253	266	178	98	114	93	40	86	87	195	141	245
AT1G15800	66	89	89	112	283	268	175	91	58	68	33	78	125	136	189	190
AT1G15810	720	838	773	869	492	451	356	206	741	608	391	711	452	560	652	671
AT1G15820	50583	51126	51196	67044	14205	22419	30067	6292	68963	57624	29431	62410	23834	28052	63044	80719
AT1G15825	3	4	4	1	14	12	6	6	5	6	2	12	11	7	19	5
AT1G15830	156	97	137	195	178	166	219	41	296	292	138	277	155	114	415	524
AT1G15840	0	0	0	0	0	0	0	0	0	0	0	0	0	0	2	1
AT1G15850	0	0	0	0	0	0	0	0	0	0	0	0	0	0	0	0
AT1G15860	621	757	679	767	704	687	577	415	606	516	335	643	426	611	656	678
AT1G15870	51	47	60	61	34	16	9	12	62	57	43	75	26	43	36	51
AT1G15880	587	761	670	751	961	845	726	462	737	728	343	638	589	677	1075	1078
AT1G15885	26	46	24	34	38	27	36	23	32	32	20	28	33	35	50	71
AT1G15890	119	188	208	179	238	241	160	129	132	129	60	128	137	156	136	215
AT1G15900	6	10	22	7	28	18	19	29	11	14	5	7	19	14	7	16
AT1G15910	558	688	492	670	610	460	408	256	773	658	340	689	444	550	804	811
AT1G15920	317	421	287	352	492	371	324	167	292	283	189	325	272	371	529	540
AT1G15930	3378	3345	3685	3723	3517	2414	1805	1152	4388	4172	2296	4356	2416	3417	3974	4176
AT1G15940	800	1065	737	903	756	688	523	369	882	745	408	778	525	662	1037	1001
AT1G15950	3425	4456	4487	4260	2732	2453	1847	1330	2995	2491	1482	2872	1397	2017	2265	2393
AT1G15960	192	317	190	216	72	57	100	61	117	80	56	183	62	91	120	126
AT1G15970	304	349	314	363	194	203	146	89	284	257	174	307	175	232	276	273
AT1G15980	3308	4006	3132	3999	807	904	1521	788	4210	3397	2254	3777	1688	1913	3386	3069
AT1G15990	0	0	2	0	0	0	0	0	0	0	1	0	0	0	0	1
AT1G16000	282	270	255	313	238	142	91	115	337	307	144	321	172	255	252	282
AT1G16010	821	1068	943	1071	861	838	673	260	759	621	387	729	557	772	1036	949
AT1G16020	518	618	501	588	153	192	157	82	586	462	271	540	240	300	299	392
AT1G16022	17	12	10	26	32	16	10	9	32	26	9	29	20	32	27	30
AT1G16025	0	0	0	0	0	0	0	0	0	0	0	0	0	1	1	0
AT1G16030	161	372	172	243	173	149	164	150	184	146	65	180	171	256	297	244
AT1G16040	223	318	281	300	249	239	193	88	203	217	119	263	145	260	292	297
AT1G16060	246	270	284	263	87	84	55	33	276	282	161	323	146	205	225	212
AT1G16070	105	95	97	113	21	14	15	7	154	113	54	116	31	60	46	74
AT1G16080	1397	1772	1201	1534	707	632	768	348	1480	1365	882	1520	769	1004	1675	1285
AT1G16090	68	99	85	115	170	69	39	27	56	47	38	55	29	25	22	36
AT1G16100	0	0	0	0	0	0	0	0	0	0	0	0	0	0	0	0
AT1G16110	174	355	255	333	497	381	247	281	135	118	62	92	139	176	255	299
AT1G16120	69	63	86	69	27	47	34	21	52	47	33	60	46	52	41	59
AT1G16130	70	80	129	105	227	191	116	119	59	44	28	66	100	130	106	115
AT1G16140	42	38	56	40	10	16	19	7	43	33	25	39	23	27	19	24
AT1G16150	65	74	101	118	292	224	116	169	62	92	55	88	99	96	69	63
AT1G16160	77	75	78	119	293	247	149	112	65	76	33	71	57	54	48	50
AT1G16170	180	181	197	185	148	159	182	88	273	258	166	250	213	288	400	361
AT1G16180	3503	4777	4486	4199	4491	5001	4129	2133	3664	3212	1759	3660	2782	3737	4768	5084
AT1G16190	631	669	601	628	308	237	209	99	575	520	329	665	329	416	460	499
AT1G16210	1338	1704	1505	1576	2028	1648	1309	884	1240	1010	526	1218	1030	1296	1590	1454
AT1G16220	178	209	194	218	112	109	58	42	180	160	69	177	85	123	97	117
AT1G16225	17	10	10	15	15	12	13	0	7	11	4	11	7	6	4	13
AT1G16230	8	8	6	1	16	9	3	6	12	7	6	13	9	11	4	8
AT1G16240	1170	1577	1376	1372	1688	1618	1439	740	1315	1132	639	1233	1214	1424	1998	2058
AT1G16250	189	283	227	233	278	260	228	87	229	200	108	205	240	214	379	373
AT1G16260	255	501	347	564	351	320	288	166	321	251	121	269	185	304	423	674
AT1G16270	1036	1281	1225	1340	989	1065	883	519	1153	1023	653	1098	790	1133	1351	1256
AT1G16280	290	320	300	304	165	139	112	100	288	252	166	282	120	182	231	214
AT1G16290	2	1	0	1	0	0	0	0	1	0	0	0	1	1	2	2
AT1G16300	404	452	408	469	526	357	232	136	461	444	220	526	235	328	294	311
AT1G16310	187	218	208	239	99	92	109	40	194	154	109	197	71	116	126	146
AT1G16320	828	1077	796	913	529	612	484	265	619	534	356	561	432	502	790	669
AT1G16330	129	121	113	164	50	37	37	32	156	145	93	191	83	132	107	134
AT1G16340	402	445	340	416	284	182	158	93	418	372	197	394	240	293	362	404
AT1G16350	1949	2020	1881	1827	1211	1168	810	455	2031	1747	1013	1870	972	1210	1480	1579
AT1G16360	5	3	7	6	6	9	4	8	9	10	3	12	13	8	17	7
AT1G16370	166	140	162	153	251	228	176	120	97	68	54	140	131	237	244	228
AT1G16380	0	0	0	0	0	0	0	0	0	0	0	0	0	0	1	0
AT1G16390	135	117	127	132	184	314	283	179	243	172	113	205	124	165	200	261
AT1G16400	790	912	949	869	142	105	42	93	1188	1126	743	1438	411	727	473	807
AT1G16410	3753	4301	3073	2166	51	177	481	64	2650	3093	1725	2509	898	1889	4166	1191
AT1G16420	46	55	78	63	173	92	32	42	32	40	18	39	16	36	12	31
AT1G16430	53	65	49	63	48	36	37	30	70	50	31	63	39	55	72	54
AT1G16440	25	16	26	23	14	11	5	6	56	41	34	78	61	92	48	55
AT1G16445	21	33	20	28	37	46	36	10	52	39	21	42	35	28	63	60
AT1G16450	0	0	0	0	0	0	0	0	0	0	0	0	0	0	0	0
AT1G16460	906	1118	1066	960	514	609	562	255	895	758	434	800	602	755	1107	1189
AT1G16470	1316	1442	1349	1402	1232	1219	975	391	1182	1023	532	1138	933	1204	1453	1411
AT1G16480	70	85	87	89	72	54	61	28	81	73	48	92	44	62	65	72
AT1G16489	29	23	12	26	11	10	6	4	22	17	18	22	9	10	22	19
AT1G16490	29	41	26	44	14	19	18	11	24	22	13	31	5	21	14	19
AT1G16500	214	260	210	299	108	145	117	76	238	170	113	176	107	161	178	152
AT1G16510	71	135	90	115	152	95	51	59	79	56	35	66	32	73	67	64
AT1G16515	13	52	19	11	7	3	11	5	9	8	6	11	7	8	14	10
AT1G16520	531	638	580	643	312	277	224	106	676	591	311	641	287	350	412	424
AT1G16530	57	40	83	42	2	7	4	5	60	57	31	61	27	28	41	52
AT1G16540	340	500	400	429	810	642	463	207	295	216	159	270	313	438	437	420
AT1G16550	129	147	127	161	125	98	86	36	151	121	81	125	100	128	157	189
AT1G16560	1072	1322	1333	1418	1225	1079	929	603	1189	1012	698	1203	889	1283	1451	1549
AT1G16570	359	445	379	428	358	307	254	104	380	354	196	412	284	365	491	501
AT1G16590	90	96	80	109	68	65	75	34	63	66	42	62	61	83	130	119
AT1G16600	0	0	0	0	0	0	0	0	0	0	0	0	0	0	0	0
AT1G16610	982	1020	998	1135	955	826	648	436	1113	892	553	999	678	837	1090	1048
AT1G16620.1	0	0	0	0	0	0	0	0	0	0	0	0	0	0	0	0
AT1G16630	275	251	249	278	94	67	63	57	348	291	175	318	168	197	215	214
AT1G16635	4	7	6	6	0	1	1	1	7	4	1	7	0	3	1	4
AT1G16640	24	24	15	25	26	20	7	8	29	20	9	33	8	13	6	10
AT1G16650	129	188	169	159	190	150	126	48	162	124	95	143	87	126	160	141
AT1G16660.1	0	0	0	0	0	0	0	0	0	0	0	0	0	1	0	0
AT1G16670	426	757	577	574	779	585	442	275	400	322	162	330	198	349	334	414
AT1G16680	540	622	445	525	377	333	270	134	566	468	273	515	358	451	602	645
AT1G16690	167	197	154	215	139	154	96	53	152	152	91	128	124	150	174	203
AT1G16700	999	1207	1166	1230	1126	1078	851	268	1128	970	516	1207	837	1143	1266	1432
AT1G16705	4	11	2	8	4	1	1	2	7	5	3	5	4	3	3	4
AT1G16710	1266	1771	1493	1644	1289	1332	1116	528	1385	1104	725	1198	940	1230	1613	1516
AT1G16720	2777	5080	3116	4386	1190	1667	2585	889	3908	2973	1772	3228	2027	2177	4759	4554
AT1G16730	136	230	189	209	18	17	20	11	124	96	52	134	38	43	43	66
AT1G16740	448	461	436	475	372	282	230	121	439	337	184	393	256	361	432	399
AT1G16750	136	234	110	176	36	43	47	18	122	100	49	155	35	50	97	82
AT1G16760	0	0	0	0	0	0	0	0	0	0	0	0	0	0	0	0
AT1G16770	3	1	4	1	3	1	2	1	1	0	1	2	2	3	1	2
AT1G16780	375	427	316	344	77	115	108	34	387	272	172	318	158	188	261	257
AT1G16790	131	122	107	115	108	67	65	18	134	115	58	122	75	92	140	115
AT1G16800	380	446	370	455	283	217	190	141	434	347	204	461	225	294	376	349
AT1G16810	969	1277	1003	1059	1082	999	873	454	900	752	487	851	696	921	1298	1233
AT1G16820	35	51	41	31	36	35	24	17	48	26	9	24	27	39	62	41
AT1G16825	48	37	58	50	43	38	34	12	48	42	21	45	40	42	48	57
AT1G16830	57	61	75	63	28	28	18	10	80	57	32	63	45	39	55	43
AT1G16840	865	1141	864	1087	1608	1518	1335	835	1061	899	570	935	1047	1317	1705	1626
AT1G16850	269	499	284	245	90	68	110	49	213	160	99	209	225	488	393	258
AT1G16858	1161	1452	1221	1333	757	579	513	285	1622	1391	806	1503	709	992	1124	1200
AT1G16860	1161	1452	1221	1333	757	579	513	285	1622	1391	806	1503	709	992	1124	1200
AT1G16870	639	644	592	703	612	525	347	152	728	654	328	693	478	540	660	640
AT1G16880	3551	4404	3907	4385	1346	1744	2189	1034	4316	3667	2300	4142	2043	2463	4521	4272
AT1G16890	1976	2576	2375	2275	2463	2466	2067	1229	1887	1640	1013	1875	1510	1946	2801	2972
AT1G16900	412	517	496	496	311	297	227	157	443	376	250	440	283	374	435	481
AT1G16905	22	7	7	14	23	15	7	8	30	26	15	53	33	36	31	43
AT1G16910	0	1	3	0	1	3	1	1	1	0	0	0	2	3	2	2
AT1G16916	56	75	62	83	67	66	42	19	73	67	39	76	44	79	88	78
AT1G16920	484	571	471	588	564	392	297	172	693	574	374	687	504	597	746	791
AT1G16930	127	179	141	166	81	87	69	48	203	172	83	196	105	137	137	161
AT1G16940	0	0	0	0	0	0	0	0	0	0	0	0	0	0	0	0
AT1G16950	0	0	1	0	1	0	1	1	0	0	0	0	0	0	0	2
AT1G16960	108	200	115	166	128	110	88	36	117	73	62	109	73	83	182	187
AT1G16970	409	577	483	542	409	389	269	179	463	374	216	474	235	395	381	423
AT1G16980	0	0	0	0	2	1	0	0	0	0	0	0	2	0	0	0
AT1G17000	0	0	0	0	0	0	0	0	0	0	2	0	0	0	0	1
AT1G17010	0	0	0	0	0	0	0	0	0	0	0	0	0	0	0	0
AT1G17020	202	201	310	236	152	167	105	54	117	108	67	135	101	145	124	183
AT1G17030	51	37	42	25	9	26	20	4	65	38	39	66	32	39	47	46
AT1G17040	158	202	159	199	103	121	94	58	179	140	76	171	101	111	179	166
AT1G17050	832	1274	781	964	443	487	401	174	792	681	398	880	420	564	610	510
AT1G17060	211	214	177	193	196	187	125	103	439	295	200	368	216	258	266	341
AT1G17070	379	490	419	449	349	324	264	122	427	343	226	368	238	308	445	388
AT1G17080	619	844	764	791	875	818	740	261	647	521	268	616	489	684	786	902
AT1G17090	63	84	93	99	42	40	23	10	61	71	40	60	38	30	33	38
AT1G17100	858	1416	857	925	137	176	187	72	665	506	323	667	230	237	378	353
AT1G17110	1305	1648	1295	1484	1340	1254	962	559	1402	1212	573	1229	922	1234	1653	1407
AT1G17120	424	518	446	491	371	396	320	223	525	446	291	500	386	408	639	688
AT1G17130	797	905	762	896	729	670	533	381	842	605	470	719	523	633	790	736
AT1G17140	749	822	668	864	294	273	318	162	913	749	402	824	286	406	552	628
AT1G17145	348	448	382	443	449	377	380	258	379	341	187	331	287	300	455	487
AT1G17147	22	57	46	48	230	108	112	69	50	27	19	39	52	69	76	105
AT1G17150	0	0	0	0	0	0	0	1	0	0	1	0	0	1	0	0
AT1G17160	427	569	429	494	398	447	362	146	362	363	203	373	260	388	559	563
AT1G17170	729	1024	1089	1030	1536	1021	799	463	420	354	259	464	403	620	445	629
AT1G17180	162	190	184	207	656	255	166	142	177	81	116	180	180	266	212	313
AT1G17190	441	361	363	417	532	297	226	109	727	402	359	816	617	653	590	835
AT1G17200	247	331	202	307	97	143	142	91	377	295	158	354	104	145	316	299
AT1G17210	1808	2661	2042	2281	1971	1827	1453	735	2277	1936	1109	1993	1485	1718	2369	2525
AT1G17220	5875	6954	5771	6407	1946	2732	2774	1168	7201	6196	3961	6260	2638	3145	5397	5532
AT1G17230	147	278	210	274	356	364	300	196	195	143	73	154	222	241	506	331
AT1G17232	33	32	22	39	32	33	25	12	34	27	13	29	14	17	40	25
AT1G17235	1	2	0	0	1	2	1	0	0	1	0	1	3	0	2	3
AT1G17240	31	56	54	54	48	39	28	37	40	49	32	40	43	39	40	56
AT1G17255	93	123	74	126	64	89	70	42	108	85	37	92	53	82	84	88
AT1G17250	76	104	93	86	32	36	15	18	42	30	19	60	22	24	31	48
AT1G17260	61	105	71	76	44	42	30	18	49	63	35	58	24	44	54	54
AT1G17270	159	189	131	146	131	135	113	66	188	184	99	185	129	137	165	212
AT1G17275.1	0	0	1	0	0	0	0	0	0	0	0	0	0	0	0	0
AT1G17277.1	0	0	0	0	0	0	0	0	0	0	0	0	0	0	0	0
AT1G17280	579	781	687	762	670	723	613	258	625	498	287	597	394	610	851	742
AT1G17285	38	64	35	41	109	52	37	32	56	54	22	46	43	68	39	54
AT1G17290	6802	11363	8005	8524	12584	9730	8019	5559	6630	6001	3492	6643	3121	5370	5062	5176
AT1G17300	34	33	33	31	336	363	288	204	66	38	28	61	166	113	136	127
AT1G17310	12	16	8	7	8	10	18	7	4	6	3	6	8	15	13	18
AT1G17330	314	382	352	369	762	573	457	183	274	252	138	260	234	297	376	382
AT1G17340	564	713	753	731	787	958	829	409	734	564	326	668	741	993	1304	1160
AT1G17345	5	8	6	9	33	44	29	7	10	8	6	10	8	14	15	25
AT1G17350	264	249	235	257	293	228	186	100	296	218	165	261	175	219	258	254
AT1G17360	1373	1680	1415	1638	568	521	445	252	1493	1262	739	1347	577	779	897	1005
AT1G17370	1445	1856	1537	1639	740	603	613	214	1452	1150	668	1353	688	969	1135	1109
AT1G17380	65	97	81	127	711	277	222	156	50	47	27	40	132	255	562	113
AT1G17390.1	0	0	0	0	0	0	0	0	0	0	0	0	0	0	0	0
AT1G17400	11	12	14	13	4	1	5	0	14	17	9	15	6	10	8	10
AT1G17410	107	126	102	103	113	113	89	71	144	125	55	105	94	100	150	120
AT1G17420	303	331	445	379	967	998	298	175	214	224	123	204	872	1844	1992	470
AT1G17430	184	225	206	207	123	116	86	108	226	257	170	212	216	294	308	445
AT1G17440	998	1492	1138	1311	895	901	759	522	912	836	594	879	669	844	1194	1130
AT1G17450	664	922	728	832	556	646	541	287	708	581	338	585	489	627	827	810
AT1G17455	123	113	98	133	142	116	108	72	138	137	70	126	114	126	194	215
AT1G17460	114	110	117	86	79	74	50	23	56	71	41	76	69	100	113	145
AT1G17470	1547	1829	1667	1646	1459	1298	1030	486	1676	1487	815	1548	1078	1379	2052	2025
AT1G17480	88	91	90	93	34	25	25	6	107	80	60	106	29	65	62	77
AT1G17490	201	273	216	222	163	173	146	63	161	148	56	158	97	144	181	206
AT1G17495.1	0	0	0	0	0	0	0	0	0	0	0	0	0	0	0	0
AT1G17500	1387	1845	1784	1771	1683	1768	1436	671	1385	1216	725	1380	911	1300	1272	1488
AT1G17510	109	103	82	99	84	65	56	34	82	73	39	104	74	96	100	125
AT1G17520	272	349	285	317	509	376	294	123	302	228	141	244	274	326	491	484
AT1G17530	615	814	693	640	952	799	732	434	554	448	251	482	560	680	919	969
AT1G17540	1	0	0	1	4	0	0	2	0	1	1	1	1	1	4	3
AT1G17545	0	0	0	0	0	0	0	0	0	0	0	0	0	1	0	0
AT1G17550	1190	1976	1213	1391	1392	1187	1053	508	1059	824	468	909	957	1342	1473	1412
AT1G17560	134	100	126	130	42	28	20	13	152	116	89	153	48	72	72	104
AT1G17570	0	0	0	0	0	0	0	0	0	0	0	0	0	0	0	0
AT1G17580	1182	1620	1258	1366	1259	1325	1068	440	1354	1085	657	1253	966	1142	1747	1548
AT1G17590	261	381	319	314	184	208	140	107	218	181	135	198	158	244	247	274
AT1G17600	71	101	104	110	86	58	47	48	78	72	34	62	49	62	43	118
AT1G17610	55	58	59	47	24	33	23	17	34	37	9	29	11	43	30	48
AT1G17615	0	2	3	1	2	7	14	6	4	4	2	2	6	18	6	5
AT1G17620	1508	1372	1478	1399	549	486	464	281	1537	1486	999	1612	752	1007	891	1075
AT1G17630	61	53	57	49	44	31	21	15	64	39	34	46	39	38	58	50
AT1G17640	98	121	88	83	130	120	121	70	118	111	49	102	97	115	161	152
AT1G17650	376	412	305	507	361	380	387	212	689	612	353	627	381	408	840	628
AT1G17665	32	73	65	71	138	118	99	60	48	47	24	49	71	67	149	114
AT1G17660	0	0	0	0	0	0	0	0	0	0	0	0	0	0	0	0
AT1G17670	0	0	0	0	0	0	0	0	0	0	0	0	0	0	0	0
AT1G17680	578	777	618	671	711	702	658	322	611	510	309	566	505	683	899	917
AT1G17690	706	767	752	861	573	454	383	250	864	670	487	724	452	553	697	659
AT1G17700	14	19	9	15	1	5	14	4	32	17	10	21	17	18	35	21
AT1G17710	31	1	26	12	2	4	1	0	14	5	0	6	4	12	2	4
AT1G17720	1616	1916	1820	2023	1644	1461	1017	548	1757	1563	942	1766	1046	1536	1683	1701
AT1G17730	477	583	510	563	505	486	342	190	483	431	238	512	425	514	655	592
AT1G17744	16	19	12	7	77	39	13	20	2	1	2	1	11	19	10	3
AT1G17745	5688	7138	5470	5196	8051	7481	4040	2190	2213	1811	1155	2216	1512	3792	2049	2279
AT1G17750	130	163	142	146	271	206	132	72	102	99	59	118	66	121	105	99
AT1G17760	652	777	699	721	429	469	394	247	699	574	337	649	424	554	697	696
AT1G17770	0	0	0	0	0	0	0	0	0	0	0	0	0	0	0	0
AT1G17780	299	461	349	351	281	303	249	172	316	252	146	236	194	258	333	353
AT1G17790	182	254	210	220	162	153	151	93	226	174	108	169	127	167	240	218
AT1G17800	0	0	0	0	0	0	0	0	0	0	0	0	0	0	0	0
AT1G17810	0	0	1	0	1	0	1	2	0	0	0	0	5	1	3	1
AT1G17820	465	566	462	513	467	405	334	195	375	331	184	330	248	344	466	458
AT1G17830	140	222	151	157	92	94	67	49	85	62	61	69	81	119	138	121
AT1G17840	1688	2437	1469	1654	617	793	954	312	1424	1076	747	1208	1011	1634	1929	1224
AT1G17850	353	344	329	367	297	265	208	126	441	346	239	378	183	213	377	322
AT1G17860	1725	1990	2690	2325	3452	3298	2099	2944	1714	1662	969	1787	1801	1877	1883	2595
AT1G17870	307	805	315	129	83	54	65	25	82	72	46	73	56	120	124	90
AT1G17880	2824	2659	2704	2776	2023	1539	1368	817	3248	2875	1638	3228	1873	2313	2706	2632
AT1G17890	877	995	960	1102	1018	862	546	455	1008	871	573	1038	592	959	857	959
AT1G17900.1	0	0	0	0	0	0	0	0	0	0	0	0	0	0	0	0
AT1G17910	0	0	0	0	0	0	0	0	0	0	0	0	0	0	0	0
AT1G17920	100	169	75	118	47	32	43	29	124	97	47	106	42	49	81	77
AT1G17930	258	339	299	320	299	240	212	105	283	225	134	221	182	215	278	334
AT1G17940	374	646	342	366	300	350	353	138	257	223	121	220	413	629	522	410
AT1G17950	66	64	81	61	58	43	39	12	62	38	21	54	37	47	31	53
AT1G17960	39	60	36	59	50	41	40	15	35	43	25	44	34	44	34	58
AT1G17970	236	262	219	278	117	176	305	80	291	225	137	249	256	282	489	432
AT1G17980	683	772	773	788	655	599	502	240	752	667	375	661	460	750	865	890
AT1G17990	2	3	2	9	3	1	2	6	4	0	1	2	3	2	2	8
AT1G18000	0	0	0	0	0	0	0	0	0	0	0	0	0	0	0	0
AT1G18010	0	0	0	0	0	0	0	0	0	0	0	0	0	0	0	0
AT1G18020	0	0	0	0	0	0	0	0	0	0	0	0	0	0	0	0
AT1G18030	173	236	190	206	243	186	128	53	208	163	105	186	149	233	275	259
AT1G18040	212	254	192	257	130	140	112	85	240	225	134	251	141	199	243	201
AT1G18050	1	0	0	0	0	0	0	0	0	0	0	0	0	4	2	0
AT1G18060	1508	1902	1310	1777	437	553	645	282	1949	1591	1037	1934	626	761	1282	1190
AT1G18070	3228	3551	3334	3602	2408	1999	1634	830	3605	3056	1874	3381	1746	2568	2694	2844
AT1G18075	46	37	31	51	25	14	23	5	44	37	31	36	9	16	20	31
AT1G18080	6809	6650	7004	7320	5401	4332	3346	1610	8182	7430	3856	8119	4814	6235	6897	6773
AT1G18090	150	123	90	138	50	59	60	16	160	118	95	183	54	85	105	89
AT1G18100	178	180	213	144	89	74	66	31	73	57	57	92	160	235	168	187
AT1G18120	0	0	0	0	0	0	0	0	0	0	0	0	0	0	0	0
AT1G18130	0	0	0	0	0	0	0	0	0	0	1	0	0	0	0	0
AT1G18140	450	557	532	561	1258	1334	1090	587	444	273	204	408	164	332	249	342
AT1G18150	1255	1472	1332	1408	766	814	658	399	1319	1209	748	1295	748	1158	1300	1253
AT1G18160	1277	1606	1479	1575	1911	1776	1407	819	1347	1076	638	1314	1142	1446	2020	2098
AT1G18170	395	500	358	358	169	189	251	101	407	355	248	403	190	228	500	434
AT1G18180	74	96	74	79	89	68	69	34	77	54	44	97	68	77	100	95
AT1G18190	530	686	533	614	565	552	442	258	585	517	302	588	356	502	633	587
AT1G18191	0	0	0	0	0	0	0	0	0	0	0	0	0	0	0	0
AT1G18200	62	105	116	155	158	200	194	119	100	71	39	92	126	151	154	173
AT1G18210	890	1121	1057	1127	1836	1436	1029	691	841	739	406	847	585	967	925	855
AT1G18220	0	0	0	0	0	0	0	0	0	0	0	0	0	0	0	0
AT1G18230	0	0	0	0	0	0	0	0	0	0	0	0	0	0	0	0
AT1G18240.1	0	0	0	0	0	0	0	0	0	0	0	0	0	0	0	0
AT1G18250	700	534	638	754	134	104	119	95	893	674	424	746	238	384	369	444
AT1G18260	1293	1695	1415	1493	1611	1572	1221	744	1229	1058	598	1104	918	1207	1628	1751
AT1G18265	43	65	60	41	17	20	32	21	50	42	34	47	23	33	54	50
AT1G18270	2478	3783	3313	3129	10430	14028	12495	5122	2403	1970	1182	2412	6320	5896	9726	9026
AT1G18280	0	3	2	5	26	20	23	15	1	2	0	4	11	9	12	7
AT1G18290	32	29	28	38	24	30	21	23	22	27	18	25	29	21	19	35
AT1G18300	127	125	184	158	523	213	122	106	80	90	66	88	64	135	160	181
AT1G18310	1	0	0	0	1	0	0	0	1	0	0	0	0	0	0	0
AT1G18320	28	30	35	28	13	9	4	9	35	40	13	50	14	19	7	36
AT1G18330	197	271	204	199	195	215	170	91	415	317	204	379	226	177	381	361
AT1G18335	152	174	184	175	157	147	121	57	180	155	71	182	121	138	217	174
AT1G18340	164	178	195	211	126	114	101	67	203	171	100	173	119	135	178	202
AT1G18350	2	1	0	4	18	13	6	6	3	3	3	2	2	2	6	4
AT1G18360	839	1077	583	781	175	184	215	68	714	622	361	604	225	343	433	426
AT1G18370	629	600	592	724	215	219	169	99	937	663	408	774	386	483	543	556
AT1G18390	481	690	703	690	1022	728	534	557	456	424	266	444	384	511	454	520
AT1G18382	2	2	4	9	5	10	6	5	1	2	3	2	4	4	3	8
AT1G18400	38	33	36	36	10	5	8	9	121	84	59	68	18	24	40	50
AT1G18410	13	18	15	20	14	11	8	0	21	20	12	31	20	16	15	26
AT1G18415	223	227	183	246	120	92	75	52	222	202	110	190	130	191	201	222
AT1G18420	67	32	54	54	45	44	27	20	139	109	69	153	102	125	96	134
AT1G18430	2	1	3	1	0	0	2	0	3	1	1	2	2	6	5	5
AT1G18440	242	285	239	318	187	187	159	141	305	264	159	341	181	266	397	214
AT1G18450	950	1067	967	1054	897	783	736	314	1133	982	508	1007	664	879	1276	1144
AT1G18460	928	1140	979	1076	885	948	1020	540	1257	1104	710	1049	1268	1169	2405	1971
[truncated: 31,612 more rows]

## Sheet: 2_TpmCounts
TPM Counts of RNAseq experiment of mock- and elicitor (fep)-treated plants
Feature ID	gene_name	fep_1d_1	fep_1d_2	fep_1d_3	fep_1d_4	fep_4h_1	fep_4h_2	fep_4h_3	fep_4h_4	mock_1d_1	mock_1d_2	mock_1d_3	mock_1d_4	mock_4h_1	mock_4h_2	mock_4h_3	mock_4h_4	ns_14d_1	ns_14d_2	ns_14d_3	ns_14d_4	ns_21d_1	ns_21d_2	ns_21d_3	ns_21d_4	ns_9d_1	ns_9d_2	ns_9d_3	ns_9d_4	soil_21d_1	soil_21d_2	soil_21d_3	soil_21d_4	suc_14d_1	suc_14d_2	suc_14d_3	suc_14d_4	suc_21d_1	suc_21d_2	suc_21d_3	suc_21d_4	suc_9d_1	suc_9d_2	suc_9d_3	suc_9d_4
AT1G01010	AT1G01010	17.2178	18.3379	22.9573	20.6124	26.4889	24.0589	18.3591	17.7485	12.1814	12.3394	13.8325	13.5914	15.5043	16.7561	9.6518	10.0297	5.51043	5.49008	4.05599	4.99413	7.77644	8.84029	8.49057	8.84157	3.68308	3.61815	3.29785	3.68045	1.98232	1.61734	1.6049	1.23877	5.8042	7.15914	6.84863	6.8094	8.00102	7.05894	7.8109	7.898	5.25819	5.49962	6.51206	5.31506
AT1G01020	AT1G01020	8.56738	8.07796	7.5041	9.92466	10.9048	9.81999	8.80746	8.7822	8.50433	8.61861	10.1743	9.11665	9.18461	10.0501	11.4874	8.33583	10.5336	10.2472	9.33194	9.23867	10.208	9.89749	12.1997	12.0083	10.3311	8.32737	8.22271	7.98547	7.08755	7.11634	7.46726	5.73616	10.0153	10.5986	9.98949	8.78184	9.81381	10.158	10.9959	9.79388	9.92762	10.3307	11.5041	9.7577
AT1G01030	AT1G01030	1.42306	1.61654	1.42643	2.48795	2.33984	2.76911	2.38869	2.3509	1.91205	2.56428	2.32879	1.57085	5.35886	6.84403	7.13127	2.03503	1.72523	1.29176	1.34409	1.53456	1.33759	1.21682	1.37079	1.49682	2.53831	1.93769	3.10294	2.2264	1.98851	1.54551	1.29512	0.940855	1.56675	1.86911	2.51843	2.60075	1.08631	1.32245	1.71085	1.00508	3.15103	2.60121	2.69107	3.16125
AT1G01040	AT1G01040	12.0704	13.1862	12.5179	14.1145	9.71656	10.6058	10.1175	8.91333	12.9144	12.9226	12.437	12.4296	10.8202	12.1131	10.5439	9.13638	9.29547	8.96223	8.8304	9.28285	15.3183	13.857	15.2324	13.8566	8.79995	8.66603	8.55541	8.69845	10.4323	10.6814	11.2644	9.63062	10.6999	10.5158	11.9723	11.9285	14.1625	12.9238	14.0839	14.0214	13.9093	12.692	12.6159	11.5322
AT1G01046	AT1G01046	3.95933	8.20791	2.56839	3.50179	4.71041	4.53821	6.82226	2.23811	6.5277	6.55522	4.51193	6.62584	2.69002	5.85106	4.51789	5.21545	4.49353	2.78228	4.84024	1.97057	10.0716	9.09861	8.21458	5.86174	2.22474	1.94535	4.99038	3.46299	4.57501	2.32742	3.97294	2.16465	5.01519	4.43062	3.90934	3.51038	7.10329	5.59181	9.30372	9.9348	5.45274	6.66646	7.14392	6.23414
AT1G01050	AT1G01050	53.6785	64.3559	62.5834	64.4431	48.8812	52.1977	46.4626	58.5441	64.5881	64.9269	72.2486	68.8585	68.8436	70.2233	57.7442	65.4637	47.5881	45.3299	48.7619	53.2174	56.4084	62.345	63.4048	62.0987	47.7744	49.4421	47.2757	47.6179	46.8985	44.2067	47.4842	43.6911	49.9261	51.7935	59.816	55.6357	55.1282	59.717	61.8531	62.2677	47.7833	52.3783	52.4244	48.7955
AT1G01060	AT1G01060	12.4443	21.4361	13.2032	15.1882	1.94907	2.83117	1.81503	3.16927	15.6519	14.0503	13.8527	17.7027	7.61838	6.08775	4.05892	3.31424	0.532181	0.859599	1.5785	0.558082	0.201682	0.243265	0.0679804	0.181101	0.794743	0.726241	1.02787	0.802432	5.8188	3.41558	4.58493	3.14884	0.629472	0.885734	0.970563	0.788764	0.264165	0.254062	0.22111	0.211683	0.459451	0.28086	0.551788	0.435659
AT1G01070	AT1G01070	6.15743	7.00451	9.214	7.15279	9.03581	10.4285	8.63473	7.09117	6.38021	8.60444	8.16882	6.36155	9.40233	9.19126	6.42172	9.76446	4.42934	2.82394	3.77306	4.01367	3.93957	3.48467	3.14269	3.93552	5.16073	4.54932	4.894	5.87787	8.14499	6.8279	6.76988	7.13056	7.80311	7.43179	7.2885	8.18515	4.88222	5.55825	4.10311	5.3754	7.96504	8.82361	9.34125	8.37559
AT1G01073	AT1G01073	0	0	0	0	0	0	0	0	0	0	0	0	0	0	0	0	0	0	0	0	0	0	0	0	0	0	0	0	0	0	0	0	0	0	0	0	0	0	0	0	0	0	0	0
AT1G01080	AT1G01080	41.6	36.2011	33.0719	38.8203	17.9393	19.9269	25.6765	33.5768	49.4028	51.2961	56.5157	46.0961	29.8806	26.8789	33.1125	34.9829	61.7758	59.5367	56.9278	57.5809	61.1874	59.5426	54.4262	57.9572	77.0152	76.9277	77.867	76.6167	86.7152	89.1368	86.198	88.4849	78.4016	76.3055	78.0333	79.7212	56.0676	54.5224	54.9367	53.6152	93.6711	86.3899	86.6737	84.6346
AT1G01090	AT1G01090	132.483	118.199	122.757	128.688	111.897	111.303	115.827	133.548	155.124	152.957	181.183	150.513	167.986	150.285	154.501	141.276	165.718	163.315	169.759	164.968	216.412	204.761	210.182	201.024	191.554	198.993	192.627	192.942	154.404	152.729	150.63	148.397	193.057	192.321	197.885	196.675	172.246	180.202	179.603	182.232	200.018	201.708	201.414	194.135
AT1G01100	AT1G01100	335.683	275.6	321.156	333.548	362.797	283.465	243.059	199.431	366.077	398.703	404.647	396.502	368.087	374.58	290.898	284.191	261.715	249	245.817	257.131	261.82	278.099	289.322	278.683	335.01	338.268	352.996	324.165	307.438	331.231	311.8	300.695	323.118	302.235	313.572	328.306	218.818	221.077	228.857	233.098	363.892	384.033	391.59	410.769
AT1G01110	AT1G01110	4.0333	3.06698	2.75185	4.77937	6.79165	5.74508	4.23955	4.12453	6.42228	6.1104	5.94608	6.8926	5.64904	5.70847	5.93101	4.96823	4.23676	3.12193	3.45731	3.96928	8.77667	7.10891	8.2984	8.32785	3.96878	3.54332	4.09924	4.304	2.47051	2.9924	3.03479	3.52529	6.4884	5.05984	5.49302	4.84159	7.17094	7.35864	7.72925	9.29369	5.3536	6.38942	6.12336	5.7634
AT1G01115	AT1G01115	0	0	0	0	0	0	0	0	0	0	0	0	0	0	0	0	0	0	0	0	0	0	0	0	0	0	0	0	0	0	0	0	0	0	0	0	0	0	0	0	0	0	0	0
AT1G01120	AT1G01120	45.3497	40.4293	45.5723	41.4891	31.651	37.1776	38.0918	40.4169	43.5902	46.3028	64.2442	49.0144	68.9079	86.7024	60.5999	44.4212	19.2334	13.3168	19.5802	23.1985	25.9418	28.4568	25.9034	27.7307	30.5559	30.7123	27.5614	29.1605	58.3144	61.2263	75.4305	76.7253	29.4182	30.8809	36.0086	37.5691	18.1242	22.5169	26.992	26.2893	43.8756	49.48	45.2178	45.5299
AT1G01130	AT1G01130	2.68991	1.55745	2.99303	1.63561	1.11435	1.3489	0.836864	1.23544	2.81997	3.07571	2.80191	2.49373	3.95971	3.60976	1.57508	0.916023	1.15753	2.23392	2.37494	1.63163	1.64726	2.89756	3.40083	3.39746	1.84209	2.32664	2.29558	2.23017	4.54573	3.42597	3.99912	5.17784	2.94141	1.58251	2.77452	2.81852	4.35669	2.54197	2.76535	3.78208	4.37805	4.34896	3.5491	2.94964
AT1G01140	AT1G01140	25.1956	25.4818	31.036	35.7136	47.0342	51.9146	43.3499	39.2912	23.5136	23.0694	21.1576	24.768	49.6352	48.1137	48.5239	40.5559	37.9971	39.4689	36.7032	39.3299	42.8468	41.9923	39.9723	49.1727	40.9141	42.9867	42.8557	42.9864	52.9232	48.6643	47.4911	51.4034	38.5321	40.7327	44.4266	40.7507	36.07	32.2355	36.7299	41.2339	40.1296	38.8053	42.3094	37.7992
AT1G01150	AT1G01150	0.107037	0.0450721	0.0501468	0.0946677	0.059123	0	0	0	0.199488	0.287973	0.0991054	0.211692	0.31513	0.302399	0.0417837	0.124973	0	0.088892	0.0472519	0.115424	0.131096	0.122986	0.103106	0	0.0488669	0.227894	0.146153	0.202841	0.10719	0.136326	0.164266	0.190188	0.165239	0.183189	0.0981365	0.112154	0.138689	0.0578001	0.188638	0.120397	0.0435529	0.106495	0.209224	0.156496
AT1G01160	AT1G01160	34.7413	31.9449	32.933	35.5485	46.2604	44.9396	45.0382	33.3864	34.428	38.8854	38.7722	34.0679	41.8351	39.6535	45.8704	36.6126	32.6883	37.6183	36.3062	35.7748	42.3371	43.3167	46.0916	45.8226	33.6282	30.748	33.5784	29.3462	24.3944	23.8845	22.3413	23.0156	36.5905	35.536	38.0209	32.756	40.5809	38.2724	43.8844	41.8829	35.7296	39.6434	39.8607	36.6331
AT1G01170	AT1G01170	70.8479	73.4358	71.9553	70.8767	56.6479	63.7442	75.9898	66.4443	64.2895	57.9828	52.5243	63.2005	70.1969	66.7662	86.4515	107.304	130.478	134.957	137.899	128.489	157.92	161.671	170.256	172.591	97.0352	95.3318	100.009	98.7004	99.9743	97.4911	94.0916	85.8311	119.57	116.484	115.151	108.627	147.862	150.624	166.043	155.203	100.897	94.1497	95.4872	90.1842
AT1G01180	AT1G01180	9.6497	8.75886	11.4027	10.3363	22.4457	22.9199	21.0817	18.7785	11.0904	12.2885	11.4165	11.5038	15.6255	14.4793	14.7747	17.1087	18.0865	16.2504	17.0869	17.5742	19.3695	21.6208	20.6562	21.8223	13.9507	12.2701	12.8833	14.4262	9.71723	10.1053	9.50251	9.90658	11.9175	11.1477	13.8116	12.1333	18.4307	20.5539	20.1556	20.3214	9.99058	9.01411	8.84425	9.66701
AT1G01183	AT1G01183	0	0.525693	0	0	0	0	0.776792	0	0	0	0	0	0	0	0	0.485868	0	0	0	0	0	0	0	0	0	0	0	0	0	0	0	0	0	0	0	0	0	0	0	0	0	0.621043	0	0
AT1G01190	AT1G01190	5.80262	3.30192	9.77202	5.72157	1.55926	1.61781	0.683074	1.15246	5.8457	7.21502	8.7124	8.80093	7.09895	9.43734	4.13238	4.73026	2.7766	1.56291	1.55773	2.49446	2.49702	3.51383	1.39738	2.52787	1.43197	1.08519	1.14208	1.26309	5.49684	4.29444	5.53561	4.22632	4.15613	4.26092	3.77441	3.82057	2.91259	2.54062	2.76388	4.14547	1.24435	1.75537	1.50209	1.2229
AT1G01200	AT1G01200	3.91622	2.64934	3.6695	3.52044	0.354617	1.03022	0.479364	0.629042	2.87165	4.76722	3.56658	5.01539	1.22859	2.61184	1.55383	1.69905	1.38924	0.693122	0.680196	0.830769	1.80851	1.3278	0.556581	0.988496	1.17241	0.820139	0.584414	0.608316	1.80019	1.58085	1.37937	1.06469	1.78398	1.48333	1.11838	1.74902	1.44188	0.901376	1.2823	1.01099	1.72411	1.21363	1.70668	1.12639
AT1G01210	AT1G01210	14.3283	18.8763	17.2616	18.9183	11.9847	10.0886	7.64181	4.01117	17.4531	16.6312	15.9199	16.193	13.1073	14.2259	12.3852	11.4715	10.3687	10.4545	11.0241	8.16698	15.1673	14.1115	14.5908	16.2506	10.0926	10.2415	8.38482	9.40658	12.4015	13.991	9.97371	9.09258	13.0611	13.7501	13.8876	15.4424	13.7031	11.606	15.6321	14.1598	15.2417	13.2375	13.2835	12.4697
AT1G01220	AT1G01220	12.4947	13.3038	11.8915	13.0242	11.4172	11.4777	10.2846	8.48228	11.3773	11.391	11.668	11.9673	10.1424	10.7917	8.96072	9.39216	9.88449	8.50882	8.27377	8.62318	10.3843	10.0291	9.85216	10.3405	10.056	9.53895	9.71655	10.7566	12.0121	13.2008	12.4913	11.3966	8.92799	9.02719	11.423	9.93129	9.80625	9.67736	10.9262	9.55692	11.5916	11.6678	12.7559	10.7
AT1G01225	AT1G01225	2.95234	3.4188	3.2274	3.20956	1.76665	1.551	2.14319	1.6573	4.92921	4.89819	4.66984	4.3184	4.0744	4.86553	2.68916	3.06405	3.02491	2.91158	2.38943	2.05612	2.3353	2.33218	1.5997	1.77568	3.7628	3.20841	4.42318	3.55506	3.14136	2.55903	2.97338	2.91436	4.43111	3.89487	3.43995	3.28684	1.96582	2.78997	2.31249	1.86798	3.75405	3.79412	3.60681	4.01679
AT1G01230	AT1G01230	32.7348	35.8646	32.9445	34.3134	41.1017	44.1217	36.7762	36.5657	34.7412	32.3739	40.2718	33.4945	39.264	40.6749	38.3949	34.5042	31.9743	30.8355	29.9053	34.8911	36.7516	34.4781	38.3207	36.0951	27.3296	25.3293	30.902	25.5604	19.3503	22.5189	21.0484	19.2984	38.7589	35.923	36.8907	41.2869	36.393	39.2819	41.3984	42.1052	27.5643	31.0611	32.2301	29.1744
AT1G01240	AT1G01240	22.8393	19.1655	20.8606	20.4548	43.0519	43.7253	49.7263	29.8376	19.1357	17.1831	15.0886	16.8473	46.1605	39.9941	46.2654	43.5312	39.465	36.158	37.2417	43.7107	41.531	39.2456	38.6495	38.8091	32.465	29.5708	28.395	31.1551	20.8939	18.8336	19.0095	17.5977	28.2915	28.8058	28.7126	28.3295	45.0741	46.622	48.6883	45.1776	23.7438	23.0921	21.622	22.2218
AT1G01250	AT1G01250	5.85415	13.0209	5.13372	4.51385	0.994955	1.89259	1.9614	0.551535	2.37795	1.8577	1.25085	2.52341	1.76773	2.29003	0.527371	1.40208	0.369111	0.560972	0.861447	1.13308	1.195	1.20732	0.722967	0.43335	0.20559	0.319594	0.341604	0.28446	2.93127	1.6569	1.43977	1.24467	0.231729	0.578028	0.619312	0.707775	1.03731	1.13481	1.58726	1.1819	0.488622	1.19477	0.52814	0.877869
AT1G01260	AT1G01260	10.1685	10.7628	10.7512	12.1245	13.8129	12.5186	11.0607	10.1477	11.6984	12.1589	12.3209	11.3712	10.4596	11.6047	9.50709	8.71621	10.4462	10.1754	11.8596	11.967	15.929	15.5494	17.8487	15.0766	8.50525	9.40835	9.48491	9.56357	6.10985	5.56413	4.43113	5.29395	11.8864	12.0962	11.5789	12.733	22.382	21.8014	23.6582	22.0847	11.4216	13.7141	12.9367	12.6768
AT1G01270	AT1G01270	0	0	0	0	0	0	0	0	0	0	0	0	0	0	0	0	0	0	0	0	0	0	0	0	0	0	0	0	0	0	0	0	0	0	0	0	0	0	0	0	0	0	0	0
AT1G01280	AT1G01280	0	0	0	0	0.0434749	0	0	0	0	0	0	0	0	0	0	0	0	0	0	0	0	0	0	0	0	0	0	0	0.788204	0.13366	0.36237	0.372936	0	0	0	0	0	0	0	0	0	0	0	0
AT1G01290	AT1G01290	17.6261	21.4305	15.6701	17.6642	11.0983	13.3768	11.0797	13.1148	16.6494	14.3721	16.8212	15.5263	14.0803	13.6644	13.5264	13.4388	11.0057	11.2908	12.1098	12.1308	16.5041	15.6905	14.4869	13.8937	12.5237	11.015	10.8974	10.5451	14.3379	12.31	12.8327	12.1142	15.6638	15.5464	13.7887	13.8673	14.4461	14.4233	15.3374	13.4655	16.0574	15.2624	13.6873	12.6654
AT1G01300	AT1G01300	53.4946	43.9155	50.3839	52.3011	19.8008	15.9041	15.2864	25.258	61.4256	63.7504	73.1746	67.3046	35.5025	33.1201	31.3644	30.1115	51.9365	48.2768	47.4141	52.425	61.2808	53.5539	54.3963	52.5443	47.9605	50.2071	49.8614	51.8023	47.4033	49.0943	47.6595	51.2352	70.1545	64.3424	69.5088	70.9536	58.6431	57.8117	58.0542	56.63	66.6519	72.1927	67.8794	70.6921
AT1G01305	AT1G01305	0	0	0	0	0	0	0	0	0	0	0	0	0	0	0	0	0	0	0	0	0	0	0	0	0	0	0	0	0	0	0	0	0	0	0	0	0	0	0	0	0	0	0	0
AT1G01310	AT1G01310	0	0.10869	0.120927	0.114144	0	0.147927	0.0803029	0.158065	0	0	0	0.191432	0.0949905	0.0729225	0.05038	0	0	0	0	0.069585	0	0	0.124318	0	0.0589204	0	0.0587404	0.0611429	0	0.109582	0	0.0764385	0	0	0	0	0	0.139383	0	0.0725834	0	0	0.0504535	0.0628975
AT1G01320	AT1G01320	73.277	68.7717	62.8336	65.8998	37.9986	55.4906	54.4978	42.627	75.0241	77.9695	73.8566	75.2211	50.48	47.5047	62.7098	52.5465	63.1415	62.5997	59.64	57.6832	75.0521	69.7969	66.7598	66.3617	76.4514	82.5137	76.7602	76.2157	115.354	117.56	113.37	106.833	61.4312	61.7036	63.4178	63.7154	54.7024	50.0957	52.3244	55.6073	89.7248	88.8367	83.8276	81.2043
AT1G01340	AT1G01340	13.1649	16.6971	20.3463	16.1897	20.8593	26.1515	24.1503	21.52	13.05	14.1112	13.2578	12.4738	13.5503	11.3506	6.22432	7.49154	4.20455	4.26874	3.8436	5.11864	9.21832	12.3544	11.6204	13.1735	2.49034	2.06593	2.10078	2.50973	1.62828	1.29151	1.60986	1.02515	4.26443	4.51073	3.79899	4.28669	8.1552	6.85417	7.48731	8.84949	3.11588	3.57462	3.62932	3.29749
AT1G01350	AT1G01350	24.0921	24.8788	25.0216	26.7645	39.649	30.505	25.8905	32.8715	23.3738	24.0855	22.9323	24.0021	29.5653	30.2284	28.0561	23.8002	24.8929	23.673	21.2711	23.8917	25.7017	28.7686	25.593	24.9176	22.3271	22.7231	20.7012	22.9133	16.3249	15.5239	16.1024	15.0961	26.1853	24.5855	25.9698	25.0552	24.7398	25.4846	23.5972	27.1499	23.6371	23.6564	21.4073	21.7712
AT1G01355	AT1G01355	0.275305	0.309141	0.343947	0.0811634	0	0.210371	0.228402	0	0.171031	0.296273	0.339872	0.181494	0.270177	0.311115	0.286587	0.214291	0.180526	0.228635	0.162046	0.593752	0.112395	0.105442	0.176795	0.79479	0.0837921	0.195385	0	0	0.275699	0.233759	0.0704169	0.43482	0.566673	0.0785288	0.0841374	0.192311	0.15854	0.29733	0.215639	0.722558	0	0.182607	0.0717512	0
AT1G01360	AT1G01360	13.5546	18.5832	15.6543	17.0623	15.5312	12.5736	11.9253	15.2886	18.8585	16.5546	16.4612	17.2067	17.7259	19.0225	12.6499	13.495	10.7899	7.69654	9.35134	10.4016	16.2153	17.2405	15.0001	16.2593	6.79269	7.85242	9.46925	8.42286	10.9224	7.44077	6.09543	7.91612	10.1219	8.90163	8.55476	8.91796	14.0503	15.1837	16.8884	18.7213	7.59319	6.83707	7.44325	7.31265
AT1G01370	AT1G01370	6.55834	5.16696	5.81479	5.9252	4.05105	3.15238	3.1593	3.10933	6.37436	7.51321	6.13766	8.57741	5.81333	4.54248	4.23941	4.55596	4.02307	3.68961	2.61503	3.57413	2.41838	2.59289	2.37754	3.80029	6.50345	6.08086	5.39229	4.74418	5.50844	5.20937	5.73591	7.35109	3.99175	4.52595	5.17248	4.87684	2.07113	2.74182	1.73995	1.74509	7.4605	6.31463	7.33331	7.90475
AT1G01380	AT1G01380	4.66176	5.32819	3.01605	3.82854	3.55591	2.54445	2.62441	1.35942	6.61964	5.97241	6.78278	5.59771	2.45086	3.51209	2.25309	3.19663	1.31009	0.460893	0.979978	0.837838	1.63131	0.7652	0.855341	1.49536	1.21617	0.945277	0.909339	0.841361	1.33384	1.31942	1.10721	1.57775	1.71349	1.9946	1.73	1.97712	0.8629	1.43849	1.04327	1.49818	1.80653	1.32518	2.34316	1.8392
AT1G01390	AT1G01390	1.86855	2.89552	1.78585	2.28061	0.247707	1.15654	1.11615	0.549247	3.83072	3.41847	3.59858	3.88028	0.935209	0.675711	0.554359	0.90175	0.992465	0.96211	0.758887	0.805982	2.15123	0.85879	1.25994	1.18677	2.04737	1.39242	1.87102	2.1246	3.18108	3.01447	3.12568	2.87743	1.57691	0.991362	1.61038	1.44883	1.22669	1.04938	1.09769	1.21903	1.79432	1.37572	1.34409	1.93058
AT1G01400	AT1G01400	0	0	0	0	0	0	0	0	0	0	0	0.0544482	0	0	0	0	0	0	0	0	0	0	0	0	0	0	0	0	0.16542	0.0467517	0	0.065223	0	0	0	0	0.0475621	0	0	0	0	0	0	0
AT1G01410	AT1G01410	0	0	0	0	0	0	0	0	0	0	0	0	0	0	0	0	0	0	0	0	0	0	0	0	0	0	0	0	0	0	0	0	0	0	0	0	0	0	0	0	0	0	0	0
AT1G01420	AT1G01420	13.5629	18.2339	12.0866	14.0499	3.34488	6.6082	6.40035	4.26714	7.96207	7.81128	5.60689	8.03898	5.37296	5.39027	5.56977	5.10097	4.28363	4.47793	3.73526	4.65158	7.16275	6.672	5.19394	5.94716	5.18844	4.98945	5.28587	4.36234	3.69673	2.81741	2.48247	2.60399	5.07974	4.0462	5.17179	5.43248	4.44267	3.89717	5.21428	5.64512	5.06302	5.6948	4.63744	4.97267
AT1G01430	AT1G01430	40.1613	34.696	33.9975	35.0448	20.1051	26.1852	24.6549	26.7102	39.9295	41.0715	48.4191	43.0935	24.6992	28.637	31.6551	32.9343	62.6527	55.6736	53.561	57.8821	65.7883	61.9834	55.1445	56.3091	88.8369	84.4451	81.4706	77.9632	49.6007	44.6959	43.4857	44.3898	54.4125	54.4421	56.1831	56.3231	43.6133	45.5306	47.637	51.9546	68.9278	65.132	59.1997	60.8895
AT1G01440	AT1G01440	12.4613	14.0327	12.2614	14.7871	16.9335	18.1876	17.627	17.3829	15.5536	13.0439	14.245	14.063	16.756	17.258	14.937	14.6268	14.1834	14.4507	12.9069	14.3866	14.5322	16.8948	16.7067	16.7721	14.0738	13.7493	13.0231	12.695	12.8772	11.7136	12.35	12.7774	13.0002	12.6311	13.6373	12.8489	16.7471	15.2057	15.1746	18.0398	13.5598	12.5394	12.2067	10.7906
AT1G01448	AT1G01448	12.778	14.9905	13.1843	15.9187	20.3228	20.972	17.5722	26.7938	17.3746	18.0853	15.8362	14.0125	21.5912	16.8	21.971	22.64	24.4033	24.8987	25.2853	28.309	32.3964	29.1927	34.3398	33.0139	21.1557	22.9714	24.0329	20.823	13.7424	13.4671	12.7045	12.3682	22.515	19.9119	21.1517	20.0052	31.0088	29.3189	30.9607	29.5288	21.5256	19.9851	20.0982	19.8213
AT1G01450	AT1G01450	0	0	0	0	0	0	0	0	0	0	0	0.0441211	0	0	0	0	0.0877717	0.0741081	0.275753	0	0.0546465	0.102532	0	0	0	0	0.0406153	0	0	0	0	0	0.0459194	0	0	0.0467509	0.0770822	0	0	0	0.072619	0	0.174427	0
AT1G01453	AT1G01453	0.64772	0.409122	0.556338	0.334174	0.298146	0.185605	0.134342	0.264435	1.76047	0.929405	0.999539	1.44115	1.35077	1.21995	0.505698	1.13438	0.530914	0.13448	0.428908	0.174618	0.132218	0.124039	0.155983	0.0519426	0.443567	0.344767	0.147404	0.255722	0	0	0	0	1.27768	1.20093	1.73209	0.84836	0.885885	0.81613	0.380507	1.45714	0.527109	0.429626	0.42203	0.420896
AT1G01460	AT1G01460	0	0	0.0406839	0	0.0959323	0	0	0	0	0	0	0	0	0	0	0	0	0	0.0383352	0	0	0	0	0	0	0	0	0	0	0.0368669	0	0	0	0	0	0	0	0	0	0	0	0	0	0
AT1G01470	AT1G01470	220.44	292.497	187.62	139.053	282.324	310.619	459.404	289.105	79.356	86.6046	82.7019	87.0403	793.763	1046.04	624.169	335.949	89.3057	73.3868	82.0777	99.1247	87.8366	106.217	81.6962	100.058	53.5269	59.2677	51.4689	59.4901	83.3697	75.6941	83.5774	88.1372	87.9995	95.3574	93.8196	103.223	111.164	126.062	130.619	131.976	73.8881	77.738	135.064	81.061
AT1G01471	AT1G01471	0	0	0	0	0	0	0	0	0	0	0	0	0	0	0	0	0	0	0	0	0	0	0	0	0	0	0	0	0	0	0	0	0	0	0	0	0	0	0	0	0	0	0	0
AT1G01480	AT1G01480	6.8287	14.2032	10.7934	9.21187	46.9773	32.692	27.554	34.8903	2.89247	3.26613	3.64033	3.10352	5.27998	7.63899	2.6657	3.40931	0.474918	0.171851	0.761252	0.55786	0.549125	0.792548	0.298995	1.26117	0.220436	0.257004	0.313946	0.196072	0.172689	0.175703	0.0793924	0.0817072	0.496924	0.767331	0.916997	0.831158	0.744784	0.484218	0.486249	0.737071	0.392929	0.617646	0.539312	0.605096
AT1G01490	AT1G01490	84.6825	88.4747	92.7321	96.1661	187.168	168.428	138.686	202.56	85.4841	92.689	86.9457	89.4618	88.8131	85.7532	88.7959	84.4932	97.7588	99.0085	106.057	100.482	114.494	123.548	120.123	123.426	71.2686	69.617	59.0902	65.4476	51.3049	51.6884	52.7238	54.4039	84.9199	95.417	84.1616	91.51	120.84	131.946	127.254	124.404	65.2843	63.2651	69.18	68.3831
AT1G01500	AT1G01500	16.6566	18.8249	18.3567	15.0752	18.1625	16.1737	13.8546	14.4811	12.1439	13.5136	12.7853	14.0389	12.5138	16.4825	15.5985	13.2002	17.1049	17.4166	17.7923	18.1478	18.2865	19.6839	20.1599	19.8077	13.5934	12.9544	13.5126	11.612	14.8223	12.2377	12.0527	12.4723	17.8531	17.4661	17.6849	16.7295	18.4138	19.2475	18.8602	19.9491	15.8376	15.2413	15.2164	14.6372
AT1G01510	AT1G01510	27.9386	29.4917	26.946	26.4177	28.8929	27.463	23.9191	25.9414	31.5965	32.0185	32.7214	30.8967	27.9063	30.1511	28.642	26.3694	27.4516	26.6039	26.2429	29.1182	30.4204	31.1605	32.295	30.2923	29.4638	30.4897	28.0156	26.3063	20.5372	19.1518	20.4954	19.8917	29.4462	30.1165	29.1828	29.6729	29.5921	30.5214	29.5257	29.8464	29.1405	30.6496	28.821	27.4889
AT1G01520	AT1G01520	3.79436	12.352	3.62369	5.1629	1.04793	0.669096	0.81725	1.25117	1.90391	1.64905	1.89172	2.74194	2.90018	1.56674	0.512721	0.567971	0.215315	0.181796	0.450971	0.314743	0.17874	0.0838413	0.281154	0.140437	0.399758	0.077679	0	0.138279	1.16917	0.99131	0.783877	1.29653	0.0750973	0	0.468307	0.152914	0.189092	0.157612	0	0.0820763	0.0593811	0.0725988	0.570522	0.0711237
AT1G01530	AT1G01530	0.0838361	0	0	0.148296	0	0	0	0	0	0	0	0	0	0	0	0.0652562	0	0.0696242	0	0	0	0	0	0.0806768	0	0	0	0	0	0.0711845	0	0	0	0	0	0	0	0	0	0	0	0	0	0
AT1G01540	AT1G01540	43.2156	45.6051	36.6351	43.5237	24.3073	26.315	24.3894	25.819	52.0272	47.9959	49.1017	49.0863	37.1902	37.9677	40.4777	38.7659	69.9807	67.9497	69.942	69.7961	78.7485	87.3127	87.6353	92.7468	55.6103	55.8588	57.2095	56.6156	61.5188	63.9348	65.9678	70.8176	63.1891	62.3489	59.0104	59.4669	80.8912	86.6226	87.3461	85.8822	63.7966	57.318	55.7316	52.1401
AT1G01550	AT1G01550	144.999	152.423	159.419	153.752	196.619	201.905	182.124	249.201	122.98	130.113	123.12	128.779	150.08	154.307	134.193	139.655	116.008	118.826	117.75	127.23	139.916	151.286	149.284	158.024	105.304	106.029	97.8833	99.9876	81.4169	80.4996	85.0181	84.4348	125.374	126.839	132.262	124.494	148.623	148.411	142.462	148.934	108.674	103.343	115.346	103.961
AT1G01560	AT1G01560	1.58236	3.43679	5.07232	4.49315	10.5804	5.48888	5.38931	5.10006	1.78498	1.25476	1.54222	1.40004	3.49401	8.3292	1.88562	2.91713	0.368624	0.414986	0.698542	0.583751	1.53003	3.68415	2.60726	3.84691	0.114066	0.265976	0.416964	0.0394561	1.79314	2.12143	2.17278	2.17037	0.685697	0.463237	0.992644	0.436321	2.44596	1.75393	2.39731	2.95084	0.169436	0.580023	0.618605	0.202942
AT1G01570	AT1G01570	1.40392	3.5101	2.26097	3.1042	1.64787	1.30746	2.18388	2.5792	1.7171	1.98299	1.78734	1.95229	3.68123	3.5697	3.01424	2.18556	1.68296	1.8582	2.05298	2.12895	1.39708	1.86516	1.77497	1.51989	1.76261	2.10171	1.59748	1.91224	1.14232	1.22931	1.54858	1.81894	1.12881	2.32767	1.52853	1.56298	1.55379	1.75315	1.90721	2.12199	1.96367	2.18251	1.61223	2.43751
AT1G01580	AT1G01580	24.9667	26.1397	19.0779	11.5268	1.01189	2.75971	3.97328	6.34643	85.234	138.284	129.298	124.402	13.9459	12.2735	5.14892	3.17781	2.67709	1.58659	1.96402	1.12884	5.64131	7.39725	5.01665	7.12716	1.69661	0.724359	0.667042	1.28946	1.02211	0.733298	1.0844	1.08502	0.215472	0.582267	0.407904	0.6307	0.203457	0.423964	0.276732	0.50043	0.212973	0.442645	0.368317	0.510177
AT1G01590	AT1G01590	0.0894252	0.175728	0	0.21091	0	0	0	0	0.0277774	0.0320787	0	0.0589533	0	0	0	0	0.205236	0.0247553	0.105272	0.16072	0.073017	0.0342501	0	0	0	0	0	0	0.0597023	0.12655	0.22873	0.176549	0.030678	0	0	0	0.0514975	0	0.105067	0	0	0	0	0
AT1G01600	AT1G01600	8.77322	8.37049	6.1449	7.16647	2.09295	1.6036	1.70478	1.35653	8.52856	4.89323	5.99113	7.9262	4.63385	5.50068	3.75474	2.94935	2.17883	1.6218	2.16166	2.07442	1.89201	1.90893	1.09498	1.00975	2.68797	3.16491	3.13081	2.70651	5.13721	4.65269	5.30061	4.55747	3.47968	3.44198	3.9016	4.21458	1.18334	1.41654	1.16433	1.77039	6.04848	6.40883	6.06193	4.68765
AT1G01610	AT1G01610	63.792	58.8164	65.2476	49.6906	22.365	31.9652	26.5465	31.6182	47.0691	45.5478	54.2215	48.0674	50.2531	45.1041	36.6242	34.3191	38.9237	34.8109	34.8792	39.9263	34.489	32.8629	30.3646	30.4652	40.7547	39.8132	38.3111	37.9791	34.6291	32.8222	35.1615	34.3626	44.6427	45.5197	43.6321	44.7037	27.9628	27.5142	26.8192	30.3371	42.5425	46.7399	45.3358	47.2801
AT1G01620	AT1G01620	217.49	160.352	196.666	189.383	329.289	390.183	475.707	204.912	298.332	277.049	275.355	293.89	882.3	720.051	806.787	709.088	609.468	559.099	581.534	576.765	526.247	566.132	617.851	586.81	526.272	544.438	560.101	545.616	243.368	280.147	316.129	365.899	457.197	422.172	407.476	398.957	545.848	559.81	537.336	528.402	363.855	346.007	330.881	335.083
AT1G01630	AT1G01630	81.4917	77.1046	72.9696	72.8161	43.3628	48.3551	42.7171	36.9707	57.04	61.4736	60.8477	67.6809	54.3874	62.1249	43.6158	51.3978	42.2168	34.8179	38.4503	45.097	38.6398	41.9098	35.3875	38.4287	47.6121	48.3136	45.9402	44.0949	43.8745	39.7809	39.8914	40.5372	46.5461	48.7023	48.6251	52.331	33.3632	34.2424	36.2663	37.9033	49.3435	48.8559	48.5965	47.71
AT1G01640	AT1G01640	24.5738	26.4148	32.0129	26.1304	12.6068	13.963	13.5915	21.4367	21.0075	21.8495	25.2809	20.8387	26.6926	24.8429	17.0539	21.471	7.02398	7.32596	8.77747	9.73904	18.3499	18.9041	21.5132	20.616	7.41539	8.19835	6.05441	5.50598	1.61256	1.18891	1.82654	1.07812	10.6639	11.5028	10.5912	11.0771	16.389	15.8785	15.711	20.0811	6.95086	7.87115	9.03205	9.28075
AT1G01650	AT1G01650	27.705	31.6378	29.3468	27.5471	56.1328	50.9814	48.981	53.4837	16.9241	17.7397	17.6726	17.5018	34.4829	39.381	36.3966	30.6592	18.5179	19.3578	20.5544	20.4577	26.8483	30.6702	27.0774	28.0803	14.893	15.1162	16.2165	13.1804	12.2216	13.7756	12.7376	13.9426	19.2866	20.8868	19.2233	19.2116	32.1256	32.0141	34.9293	37.3762	14.3561	16.0266	15.9185	14.2634
AT1G01660	AT1G01660	0.96026	1.4308	1.76492	1.04528	2.40724	1.69332	1.01115	2.26171	1.37667	1.43086	1.50464	2.22785	2.12034	2.50423	1.87427	1.89736	0.762873	0.70546	0.65217	0.876192	1.26657	1.48527	1.31633	1.84815	0.438399	0.58976	0.36982	0.349951	0.850679	0.65855	0.76518	0.437495	1.29236	1.01135	0.880412	1.31576	2.42464	1.71518	1.56215	2.24332	1.0219	0.955395	1.03957	0.647988
AT1G01670	AT1G01670	1.42979	2.37065	2.00957	1.85733	1.4808	2.04854	2.39093	4.26844	1.62383	0.865512	1.57206	1.32551	2.17051	2.1207	1.88373	1.49548	1.36239	1.00188	1.18347	1.44545	2.24368	1.95087	2.28111	2.10686	0.530367	0.618349	1.13884	0.9314	1.70031	1.85897	1.91997	1.58782	1.33355	1.18528	0.983174	1.77905	2.19996	2.41278	2.46731	2.5129	1.12719	0.889091	0.943241	1.21944
AT1G01680	AT1G01680	2.02527	3.1912	4.71359	3.87137	0.50521	3.1451	6.01631	1.92037	2.55696	1.54676	1.08882	0.969064	4.90476	4.65125	1.47919	2.33921	0.12852	0.162769	0.230726	0.0704503	0.80016	1.87666	1.13277	1.94895	0	0.0695489	0.0594709	0.0619032	4.12178	1.66417	2.40629	2.0895	0	0.391342	0.239595	0.0684549	0.90294	0.705581	0.844343	0.587888	0.212665	0.195001	0.102162	0
AT1G01690	AT1G01690	5.81263	3.98526	3.91027	5.37161	3.45764	2.77604	2.45754	1.82541	5.9027	4.77171	5.38191	5.3058	5.26557	4.37914	3.66541	3.53834	4.06808	3.46574	4.21089	4.8216	4.33538	3.63907	3.44563	3.22707	5.54558	4.9979	4.98596	5.71946	3.80602	3.2903	4.66038	3.48685	4.94683	4.52766	4.44108	4.95833	2.7358	3.90342	3.58978	3.6882	8.36895	7.67385	6.67146	6.79155
AT1G01695	AT1G01695	0.290529	0.285457	0.272226	0.385433	0.320953	0.222004	0.180774	0	0.225612	0.364766	0.179334	0.287296	0.285117	0.0547199	0.0378043	0.263831	0.0952545	0.160852	0.0427517	0.261077	0.474442	0.222547	0.46643	0.0931935	0.176852	0.360832	0.0881558	0.183523	0.484909	0.370028	0.594487	0.516224	0.199337	0.207178	0.17758	0.304419	0.543749	0.313772	0.455127	0.272327	0.31524	0.433586	0.530033	0.283184
AT1G01700	AT1G01700	1.1675	0.801158	1.25601	1.07082	0.38215	0.346939	0.753349	0.423676	0.886477	1.25642	1.28116	1.02622	0.127306	0.879571	0.371354	0.605835	0.595439	0.502746	0.45813	0.606172	0.635518	0.496837	0.583134	1.04028	0.51327	0.828576	0.472341	0.655546	1.29908	0.917879	0.76314	1.07564	0.623029	0.962058	0.594675	0.498387	0.597625	0.4203	0.457234	0.486378	0.950098	1.29065	1.01426	0.969389
AT1G01710	AT1G01710	22.1618	28.0176	23.468	24.9932	23.8957	25.982	26.5403	20.6361	21.6184	19.8476	20.1448	19.7887	28.0056	27.589	27.1586	23.532	19.3597	18.7201	18.316	22.2068	21.7827	21.3945	24.7596	23.1282	18.2028	17.3442	18.0551	17.9306	17.8359	17.2707	18.4809	18.0707	20.1266	20.6531	22.4297	21.8429	23.5142	22.596	22.4713	23.8467	19.4557	19.5325	20.275	17.4834
AT1G01720	AT1G01720	27.5461	31.8328	32.3196	31.693	121.088	66.1673	41.1357	61.1383	17.2766	16.2399	18.2748	16.249	88.4334	93.0087	37.7014	39.0418	39.0159	38.5917	39.5053	44.4793	26.3448	25.3206	26.719	31.9019	32.5444	32.3334	34.1894	32.0018	12.6174	12.081	11.8735	11.9738	39.9855	39.97	38.6521	41.4123	36.623	38.7008	41.1448	40.7917	31.6955	35.1281	33.9733	32.4998
AT1G01725	AT1G01725	12.2471	14.7681	9.38908	11.4473	11.8384	15.6329	12.1234	12.2726	7.00322	8.9863	8.24697	8.80786	13.7262	10.6947	12.1695	11.4828	9.17156	10.7489	8.47843	11.2557	13.4658	14.5517	19.3046	18.0802	6.60792	7.70411	8.48806	7.38466	6.41107	5.90847	7.04822	9.56173	13.7503	10.3611	10.5907	10.4994	16.2294	18.187	18.8041	17.5328	10.0799	11.4927	9.68451	10.5809
AT1G01730	AT1G01730	26.6035	28.5312	29.0172	31.6786	45.8445	44.9456	36.2104	24.607	23.8871	21.2486	18.7307	22.3339	36.0005	38.9109	29.5868	27.1787	23.9184	23.4745	28.2595	30.2569	35.044	37.0155	36.304	36.3347	18.9143	18.8069	21.3791	21.2689	15.541	12.3532	12.7055	13.2947	25.6684	24.1882	26.4875	26.7865	31.7176	32.7723	33.9429	37.0934	26.7239	26.6755	30.9842	27.0789
AT1G01740	AT1G01740	8.27746	7.67139	6.8706	6.85291	6.72251	5.50199	5.97357	6.2957	4.86055	5.81658	6.29925	6.09229	4.33984	4.2713	3.98373	3.44215	4.01508	4.48867	3.97114	4.89098	7.08272	6.81829	7.8278	8.14739	5.55635	3.78224	3.78467	4.40504	3.86078	4.4288	4.23439	3.76088	5.5237	4.52812	5.1634	4.79205	6.49716	6.93948	6.21707	5.73944	6.4593	6.6185	6.44238	5.19459
AT1G01750	AT1G01750	10.4938	6.76633	9.21815	9.8612	8.5134	4.79243	2.24451	10.041	21.4675	21.0862	25.0496	28.6179	29.8089	30.4807	13.5054	19.846	4.19318	2.92766	3.0401	3.09423	3.41395	4.33315	5.37007	4.10245	3.59315	1.83278	2.53737	2.79651	0	0	0	0	11.3906	10.6636	10.8239	8.93385	10.9767	12.2188	7.70579	15.0312	3.26913	3.67054	4.80752	4.55487
AT1G01760	AT1G01760	3.84419	3.92547	4.99779	4.63244	6.68864	5.34257	5.44169	4.70823	4.47784	4.55068	4.44917	4.37162	5.87109	5.64749	6.34024	4.37614	5.90803	5.30757	5.47294	6.01083	5.35565	5.63168	5.83222	5.64147	5.57224	5.52468	6.08013	5.23606	3.75346	3.63128	3.09727	3.35834	4.10471	4.85214	4.93435	4.98463	5.31303	4.72261	6.66196	5.13477	5.55286	6.02393	4.92179	5.05845
AT1G01770	AT1G01770	12.5716	15.6677	14.6807	13.7628	38.3618	47.1143	45.4394	29.0292	10.9191	11.7482	10.9233	10.8216	25.5	20.3601	23.9855	21.1083	26.7523	28.5062	26.1582	31.3443	27.9179	29.9324	33.0128	35.0092	21.6418	22.1064	21.8187	22.7363	14.3003	14.0059	14.2139	15.4925	21.509	22.8633	22.4651	23.129	30.5955	28.0772	28.6629	27.651	21.8732	21.0058	21.704	20.4489
AT1G01780	AT1G01780	18.1279	16.9632	18.0553	16.9237	34.4155	44.7118	35.5934	32.0701	21.5852	21.5317	25.4877	22.0425	35.284	27.0869	25.2134	25.5031	23.3118	20.6865	22.111	23.3131	30.8369	28.9293	26.5811	27.2655	19.6788	18.369	19.252	22.4569	13.5818	14.7651	13.7556	15.2701	25.4285	27.0034	24.4383	24.5523	30.6801	29.4398	30.4492	32.5494	24.915	22.8457	25.4602	23.2322
AT1G01790	AT1G01790	44.1086	53.7498	34.3176	49.914	26.5202	32.3435	36.1236	34.0047	56.2435	52.0877	56.4533	60.1647	36.5786	40.1075	46.5022	33.9171	47.942	42.1469	42.5194	44.3856	33.4296	31.7339	27.5247	26.9207	48.5281	53.371	50.3706	51.0647	72.706	68.0687	69.9792	70.9387	38.5437	40.5035	39.2973	40.4297	34.6173	32.8547	32.5635	32.3231	47.5616	49.4132	42.3019	43.4672
AT1G01800	AT1G01800	70.8678	83.2757	75.2426	72.192	74.6035	68.2404	62.3496	97.0823	56.4443	54.7229	54.0057	57.3944	53.6004	59.9344	49.5805	55.744	48.262	46.5293	47.8415	50.9264	62.1387	64.5737	62.9456	63.0492	44.1193	40.8444	40.3716	45.6745	37.0977	36.5826	38.8424	39.1799	46.7686	54.8353	53.6887	51.473	60.2721	63.0565	61.5013	63.279	45.5007	42.2366	45.6501	42.3876
AT1G01810	AT1G01810	1.18394	1.16327	0.832014	1.13438	0.980941	0.226173	0.368338	0.241674	0.551636	1.06176	0.365403	0.780509	1.16189	0.44598	0.924343	0.998348	0.776347	0.409682	0.435546	0.531961	0.362514	0.906903	0.190076	0.664605	0.720691	0.945277	0.538868	0.747876	0.691621	0.502636	0.454239	0.350612	0.5077	0.590994	0.633203	0.930408	0.340899	0.319665	0.927348	0.554882	0.56203	0.981618	0.462846	0.961672
AT1G01820	AT1G01820	60.8791	67.9392	70.6283	62.3567	139.028	144.938	115.588	128.2	55.4418	55.8051	51.5777	53.8959	65.6193	62.6115	67.6792	61.9495	73.904	79.885	82.6443	82.84	107.055	114.326	120.068	122.438	57.3455	55.3952	53.1181	49.7615	36.4473	41.7826	37.9903	43.4685	64.1411	73.614	72.3082	69.841	107.15	107.655	113.299	102.785	61.4391	66.2567	66.6962	58.4017
AT1G01830	AT1G01830	13.6389	16.5386	14.6357	14.4904	13.1291	11.5788	14.0502	10.5356	10.4683	11.663	8.69832	10.4092	15.2455	12.9508	11.3774	12.2682	6.90245	7.26142	6.64555	8.39127	6.65412	7.15285	6.48723	7.51554	7.77698	7.25971	7.36686	7.18555	9.66296	8.45728	9.31485	8.84902	7.89209	8.59605	10.144	9.16168	6.84399	6.60104	6.41647	6.90679	8.52018	9.90993	8.42938	7.39175
AT1G01840	AT1G01840	1.38054	0.775109	1.00611	1.49234	1.10147	0.879104	1.14534	1.50297	2.00119	1.40315	0.852161	2.12361	1.12902	1.12675	1.07784	1.13428	0.754388	0.382171	0.812595	0.992475	0.845425	0.616876	0.812678	0.590452	0.910398	1.06142	0.907618	0.94474	3.4563	2.53978	2.29523	1.63534	0.868278	0.590685	0.773512	1.12509	0.662513	0.662662	0.811007	0.69016	1.18589	0.763082	0.899509	0.822335
AT1G01860	AT1G01860	9.38666	8.88849	8.35773	7.97151	7.53218	6.63743	8.31052	7.09234	9.39988	8.89543	9.33969	8.8204	8.18065	6.49124	7.25558	6.03412	10.1973	11.0144	11.3799	10.1725	13.1552	11.6439	14.62	13.4371	11.641	11.6332	11.6054	10.0446	14.7783	14.6714	13.6171	14.8808	11.7753	11.9488	12.374	12.5757	11.8599	11.8525	11.248	12.2918	14.5555	11.7087	12.378	11.1067
AT1G01870	AT1G01870	0	0	0	0	0	0	0	0	0	0	0	0	0	0	0	0	0	0	0	0	0	0	0	0	0	0	0	0	0	0	0	0	0	0	0	0	0	0	0	0	0	0	0	0
AT1G01880	AT1G01880	0.916899	0.90533	1.12576	1.17447	0.838277	0.761038	1.023	1.16171	1.44369	1.25894	0.936779	0.844165	1.5359	1.39346	1.43171	1.55044	2.14581	1.68048	1.61908	1.97748	1.23917	1.81642	1.73599	1.91682	2.82918	2.72632	2.21614	2.30678	1.13985	1.18122	1.50418	1.38574	2.37539	1.92096	1.94221	1.68957	1.58405	1.33172	0.928685	1.38698	1.77536	2.61094	2.00238	2.09562
AT1G01890	AT1G01890	0	0	0	0	0	0	0	0	0	0	0	0	0	0	0	0	0	0	0	0	0	0	0	0	0	0	0	0	0.864865	0	0	0	0	0	0	0	0	0	0	0	0	0	0	0
AT1G01900	AT1G01900	9.53359	10.36	8.33265	8.40922	2.51974	5.37561	6.66557	3.32715	6.0421	4.96438	5.78985	7.172	6.33795	7.79064	7.70333	4.68783	3.50386	3.40536	4.45754	3.64795	3.98633	2.67965	2.12305	2.7375	3.13566	2.91922	3.7793	2.8897	8.59767	6.7675	7.61044	7.43768	5.43338	4.5177	4.65239	4.83358	2.78934	3.15532	2.16796	3.14212	5.04711	5.30361	4.58866	5.3707
AT1G01910	AT1G01910	35.5982	33.6682	36.0369	37.6203	54.3188	52.5815	40.9547	38.4482	39.1931	38.3562	40.548	42.2338	39.4456	44.3936	40.6566	34.1889	41.5821	41.8067	45.403	42.4085	39.1919	40.8029	40.9734	42.9356	42.006	39.6964	39.2727	41.2487	36.7782	33.9813	36.2324	32.9231	39.1803	41.6307	44.5246	44.2059	38.915	39.8042	42.2832	39.2124	41.4606	42.8379	40.9872	39.8543
AT1G01920	AT1G01920	13.3649	14.6381	10.8785	12.8055	15.8458	12.4177	9.99599	13.0621	16.8574	18.1602	15.687	18.5227	16.7925	14.3025	13.2276	11.4012	13.7101	12.9772	12.6046	14.1938	21.3293	21.9876	22.107	22.4098	12.8505	13.3654	14.2245	12.6956	9.39592	8.59701	8.80513	9.59491	14.658	14.6425	15.5955	14.9587	16.0344	16.3296	17.8439	17.8424	16.0398	16.9238	16.9412	16.4812
AT1G01930	AT1G01930	9.68221	11.5008	9.30865	11.269	13.8667	13.9898	12.677	11.5108	8.84619	9.26568	10.5708	9.7304	14.4385	12.6524	12.213	11.7097	12.5635	13.1221	13.8113	12.6515	12.3993	12.9368	14.9772	13.1718	13.1026	12.7246	13.9239	13.0889	10.5804	9.23867	10.1399	9.07821	12.1394	13.0083	11.8265	12.0287	11.8507	12.8752	11.8204	12.0614	13.1664	11.5472	12.2061	11.3126
AT1G01940	AT1G01940	29.0383	26.4753	24.5602	24.925	23.468	23.8584	17.9084	18.6743	22.5099	25.719	21.7313	25.8351	23.5797	19.0697	17.4548	17.3354	16.7665	17.3576	14.672	18.1046	22.5562	19.8813	23.4335	19.0415	17.5198	16.7787	17.8562	16.0704	13.8108	11.6371	11.8969	11.9732	19.8355	21.4038	23.5608	20.1947	18.3502	16.4671	19.8263	21.7752	23.6311	24.2038	23.1731	18.9529
AT1G01950	AT1G01950	11.7723	12.1982	11.661	12.2339	8.03528	8.77075	7.03723	7.41511	11.8517	11.8092	11.6785	13.1796	9.68596	10.144	8.91202	8.99965	9.90434	9.28781	9.55862	11.2892	11.5089	12.3912	13.5674	13.4123	9.5974	9.39919	9.43414	9.52121	7.07349	8.83551	9.79142	10.1599	11.9859	12.5024	13.7037	11.8726	11.7851	13.0774	12.6211	13.4309	12.8135	11.7754	12.689	10.819
AT1G01960	AT1G01960	33.3409	34.4175	34.1322	33.0091	35.1466	34.7832	30.1973	35.6074	34.2873	35.4234	35.7993	35.7608	38.3214	36.9257	35.6238	34.6143	40.7725	39.5515	38.969	41.1866	42.465	43.7665	47.0251	46.0179	38.3	38.681	37.8801	38.451	25.5758	26.8189	26.8073	27.4123	43.1931	41.6278	45.0953	42.9894	44.8156	42.7985	43.0682	45.1423	44.5455	44.7924	42.5114	41.422
AT1G01970	AT1G01970	14.8723	12.7183	12.3949	13.6609	7.13785	8.36999	8.32613	6.64919	13.6452	16.1696	19.6111	13.8372	9.17364	10.7581	11.5218	10.2966	14.3275	15.7485	14.211	16.6148	14.8906	14.6723	13.1844	12.9138	16.512	17.2976	14.9303	16.9537	28.1792	21.9771	22.648	21.1496	14.834	15.6711	16.1244	16.665	13.6394	14.4105	13.8351	13.3743	18.5745	18.2204	19.5199	16.844
AT1G01980	AT1G01980	0	0	0	0	0.0381	0	0	0	0	0	0	0	0.050769	0	0	0	0.0339227	0.0572838	0.0304501	0	0	0	0.0332217	0	0	0	0	0.0653573	0	0	0	0.0408536	0	0	0	0	0	0	0	0	0.168398	0.0343137	0.0808967	0.0672329
AT1G01990	AT1G01990	26.0542	28.4437	23.5086	22.3322	33.2244	31.5226	25.4848	40.7086	24.6787	24.9809	26.109	26.8775	24.8587	22.7791	30.0936	25.204	30.7944	31.3877	30.8606	34.1079	44.1888	42.1328	35.8901	41.8905	27.2651	28.8205	25.6691	28.954	22.1188	20.3927	19.7866	19.1146	27.3661	29.4978	29.6876	29.9962	36.5373	39.3709	38.1067	38.6529	27.9649	29.3358	29.4249	29.3668
AT1G02000	AT1G02000	9.13281	9.00319	8.69013	9.39235	9.18979	8.64227	8.0174	8.41084	11.8092	11.3903	12.3236	12.3216	11.0471	11.9209	9.17544	8.43135	8.07776	7.8786	8.00093	8.16884	8.36754	8.17531	8.3541	9.02711	7.53099	6.78307	6.76686	7.17778	7.90519	6.76272	6.79062	7.50578	8.81636	8.45135	8.14621	9.16146	8.98979	8.83125	8.23484	10.2329	6.82726	8.24129	7.33445	7.00422
AT1G02010	AT1G02010	6.03155	6.6656	6.67448	6.87939	4.49237	4.22312	4.1096	3.34264	6.38358	5.87416	4.90233	5.3437	4.4595	4.59547	4.96474	4.94975	3.99983	4.6011	4.43374	4.44401	6.05022	5.55051	5.5997	5.09514	4.7348	4.61958	3.90049	4.49964	4.86496	4.61152	4.73293	4.1058	5.11208	4.29726	4.8544	4.63271	5.32798	5.51193	6.02837	5.58716	4.88622	5.67515	5.16404	4.70857
AT1G02020	AT1G02020	9.22606	9.41187	8.72201	9.00988	8.61485	12.1172	10.8663	10.6944	8.21364	7.94892	9.40681	7.14122	10.4689	10.24	11.6836	9.6179	11.4515	10.5125	10.861	11.696	13.5194	11.6735	12.2199	11.6793	9.72791	11.5463	10.2231	11.5519	10.0917	9.65232	8.70185	10.4409	10.6256	10.2447	10.347	11.0482	11.5985	11.0021	12.4851	11.2733	10.927	11.3649	10.1978	10.1169
AT1G02030	AT1G02030	0.78074	0.630126	0.579147	0.863147	1.25781	1.37962	0.728693	2.23119	0.939746	0.560136	0.481924	0.675545	0.766198	0.551434	0.12699	0.379819	0.0639945	0.0540324	0.0287217	0.105239	0.0796857	0.0373782	0.094008	0.156525	0.207924	0.103893	0.177676	0.184943	0.162887	0.110487	0.0499241	0.0385348	0.435239	0.167026	0.268432	0.102258	0.168602	0.2108	0.191104	0.0365913	0.370627	0.0970981	0.30522	0.19025
AT1G02040	AT1G02040	0.0646613	0.163369	0.0605877	0.057189	0.214298	0	0.160935	0	0.241023	0.139172	0	0.0639417	0.285556	0.36536	0.0504833	0	0	0.1074	0.22836	0	0.237586	0.148593	0.186859	0.186674	0	0.0688356	0	0.0612683	0.064754	0.0549033	0.0992337	0.0765953	0	0	0.177854	0.0677528	0	0	0.227914	0.290929	0.0526208	0	0.202228	0
AT1G02050	AT1G02050	5.23771	6.15124	6.66372	7.6924	7.32566	5.72811	7.17585	5.41446	7.61233	7.03287	8.72037	7.50779	9.12495	7.16797	6.75292	7.92942	8.50757	8.89916	8.06092	10.3117	13.7717	14.4657	16.9412	15.2597	7.54665	9.00319	8.26722	7.51261	5.96704	5.26331	4.75652	5.52134	9.64359	9.49869	9.60436	9.86856	13.9052	11.9882	12.9287	13.4585	11.6141	9.51399	10.2193	9.27383
AT1G02060	AT1G02060	5.38646	5.51192	4.66723	5.37871	5.75858	5.6429	4.90125	5.10747	6.15289	6.45119	5.79172	7.10202	6.47977	5.53075	6.39854	6.46939	8.03262	8.51379	8.28421	8.71277	12.8752	12.0121	12.4415	11.6489	6.00243	7.52227	7.19674	7.54597	3.68313	3.12283	3.24435	4.0479	7.00402	7.43444	9.74437	7.91979	11.4571	10.6339	12.5211	12.085	8.90832	8.61501	7.74379	9.23033
AT1G02065	AT1G02065	1.97499	1.69591	1.34257	1.26726	1.49732	1.02091	1.34937	1.23316	2.88694	1.62532	2.00792	1.83813	1.53916	1.57545	2.3885	0.994716	2.01878	1.28642	2.18822	1.87918	3.69951	4.31608	3.46917	3.31667	2.263	2.30861	2.4676	2.23829	3.45149	3.12372	4.04127	4.67899	2.59058	1.88889	1.77526	1.86653	4.21485	3.68046	5.14136	4.70436	2.96235	3.0438	2.39199	2.9442
AT1G02070	AT1G02070	0.521893	0.175811	0.195606	0.0923167	0.230619	0	0.389682	0	0.680869	0.224657	0.579865	0.516086	0.460956	0.353867	0.325969	0.649969	0.308	0.693475	0.829412	0.562786	1.15056	1.55912	1.30709	1.30579	0.953066	1.00005	1.14019	1.08792	0.209057	0.531762	0.48056	0.865501	0.644543	1.16116	1.24409	0.437477	0.901632	1.12729	0.85845	0.117407	0.509655	0.4154	0.897722	0.712179
AT1G02074	AT1G02074	0.428876	0	0.401857	0	0	0	1.06743	0	0	0	0	0	0	0	0.334838	0.333828	0.843683	0.356173	0.757316	0.92496	0.525275	0.985563	1.6525	0.412714	0.3916	0.456562	1.56162	1.21911	0	0	0	0	0.441388	0	0.393214	0.449381	0.740933	0.463187	0	0	0.698031	0	0.670654	0
AT1G02080	AT1G02080	30.2237	33.4649	32.8157	33.0334	32.0193	35.3386	30.3707	30.3654	31.6221	30.0391	30.998	30.1792	33.418	32.697	30.7863	28.6782	32.4569	28.7349	28.7472	31.7098	35.4576	35.6575	36.6845	36.291	28.2359	29.8856	27.1594	28.5978	23.3083	24.8607	25.9806	26.9313	32.4507	32.7766	33.6562	32.1812	39.5983	36.6764	36.7288	39.052	35.4525	35.2138	33.9632	31.8844
AT1G02090	AT1G02090	36.0184	33.4223	32.5725	33.8999	33.4083	25.8532	24.4433	27.9327	33.3771	32.5988	34.3261	39.7903	35.5694	33.3235	28.8268	25.2597	26.8795	25.4903	25.5916	27.4105	27.1331	28.5715	26.566	25.5245	28.301	32.3006	29.2663	29.5113	23.6945	26.1469	23.0896	21.8388	31.1754	34.39	33.4379	33.1084	27.0774	23.6547	24.73	27.2355	35.4027	38.6848	37.392	33.2961
AT1G02100	AT1G02100	36.5604	43.4802	40.6235	37.6498	47.1801	50.9121	43.8295	35.5506	40.3147	41.5336	41.426	39.6729	46.0627	40.637	38.3955	41.4455	37.4156	37.2336	39.7474	40.9702	58.0814	53.745	61.5751	61.7365	33.0029	30.6543	32.4814	31.4449	24.2543	21.8204	20.5351	22.4479	39.1017	40.8179	42.1229	39.2286	57.6926	54.0615	57.8891	56.9807	36.2598	37.157	36.6084	32.933
AT1G02110	AT1G02110	15.1754	15.901	12.7387	14.0723	17.5772	15.3956	16.0709	17.2849	18.7114	19.5858	17.1033	18.1857	20.1333	17.5496	20.5266	18.7044	21.3313	20.1601	20.3263	21.6234	27.5293	26.3898	28.685	27.2145	22.7126	25.2623	24.1809	23.6468	12.3596	14.1114	13.6725	13.813	21.7028	19.5141	22.5814	22.3813	23.4873	23.0983	23.0795	24.4858	24.9653	24.0167	24.0501	24.5378
AT1G02120	AT1G02120	67.5799	79.9114	72.2103	76.2665	126.663	112.64	94.6718	85.8205	59.5231	60.4226	56.1257	56.8479	67.7472	67.3474	58.0482	66.2257	53.0892	56.9725	56.7343	61.0621	94.2702	91.8514	90.8477	88.5755	44.4424	44.7091	41.4867	44.9689	42.186	40.8124	40.0196	39.421	58.3759	58.896	59.2665	55.4842	87.4813	87.6114	88.2184	89.5585	56.3475	56.5291	53.4133	54.5088
AT1G02130	AT1G02130	43.4089	45.0865	42.5834	47.2397	41.8836	43.9519	40.8801	36.3009	45.4573	44.9209	45.8523	51.0469	48.1754	50.5904	41.2186	44.8431	42.6969	42.9218	44.7047	41.2835	42.0488	42.0018	43.8963	44.0311	42.3986	42.3986	39.6274	43.998	37.1638	37.4872	37.3839	36.2796	42.8324	46.2875	46.2533	41.9905	42.2441	42.3469	45.1251	43.5485	42.3608	43.9262	45.9135	39.7234
AT1G02136	AT1G02136	0	0	0	0	0	0	0	0	0	0	0	0	0	0	0	0	0	0	0	0	0	0	0	0	0	0	0	0	0	0	0	0	0	0	0	0	0	0	0	0	0	0	0	0
AT1G02140	AT1G02140	125.768	121.949	124.016	116.988	100.256	93.9871	78.7558	58.2309	121.091	121.432	119.126	123.495	103.209	115.263	94.555	95.0822	93.0556	95.1104	95.9385	90.1553	102.593	112.857	107.224	107.89	97.9708	87.2918	93.4314	89.5669	102.464	94.4459	96.5679	92.0899	110.757	104.462	107.579	109.649	105.31	100.962	99.5489	105.332	111.565	112.266	114.599	111.159
AT1G02145	AT1G02145	18.3683	19.5946	19.8761	19.7393	16.888	19.0164	17.1561	15.3849	19.5463	19.3847	20.4818	18.3983	20.2358	17.9452	18.5042	18.8788	15.8524	14.6312	16.2524	15.3775	19.4974	18.7905	20.6236	21.7815	13.9224	16.9469	14.5271	14.0733	14.4784	13.4833	13.9431	13.6165	16.6276	19.707	17.3117	17.3425	20.439	19.6245	19.8175	19.6391	17.3268	18.5504	18.0988	19.521
AT1G02150	AT1G02150	43.009	38.0004	38.382	41.1042	29.7549	33.672	32.4914	34.7669	51.2441	54.2417	50.1825	49.5155	44.4593	42.8218	47.1081	42.7523	80.8737	78.8924	78.2484	84.9273	83.3604	75.7385	78.9162	76.0109	90.3261	90.7278	90.3808	88.9481	95.5291	91.4507	89.2304	87.2314	79.7632	83.0988	84.1615	79.4091	70.0263	67.9103	70.698	66.6071	92.0272	94.1537	87.8501	84.7121
AT1G02160	AT1G02160	26.9678	25.1343	25.7181	25.4415	25.4224	23.9043	22.2242	32.0016	25.2421	24.6363	22.1951	24.4158	24.8776	25.735	27.6986	28.0815	25.5824	29.0653	27.9372	24.5572	38.0206	33.4651	36.5992	37.2549	24.7333	24.6257	27.2763	26.802	21.7252	21.5751	22.2568	21.8646	28.248	30.5644	32.9672	32.0248	34.3731	33.9148	36.8952	37.4792	31.3099	33.5092	31.019	28.1552
AT1G02170	AT1G02170	33.6931	35.5688	38.645	38.731	87.8926	74.6963	64.4208	78.0241	31.2215	29.302	36.2647	31.6382	40.9151	44.315	38.058	39.4859	31.5159	32.2531	30.3312	37.0455	38.3188	43.485	41.274	48.1356	31.3679	26.6751	27.3201	29.0635	22.0217	22.4781	23.9347	26.44	35.5988	33.3549	36.7322	34.0678	45.9392	43.2179	46.1841	43.2596	29.0704	32.4895	32.7637	28.1956
AT1G02180	AT1G02180	3.91454	3.12323	2.83138	3.76588	2.04844	2.12536	2.30753	2.18692	4.67178	4.95176	4.4511	4.41428	2.93177	3.10437	5.0937	3.47464	3.37749	3.07985	2.42539	3.92503	2.01871	3.07747	2.97692	2.04873	3.57431	4.31347	3.62591	4.88044	4.40158	6.70592	6.11292	4.31161	3.25127	4.40762	4.34463	4.17366	2.07631	2.37346	2.74341	2.2402	6.03592	4.44134	4.83265	3.81557
AT1G02190	AT1G02190	0.0872793	0.490032	0.0272603	0.334504	0.224978	0.0333467	0.506868	0.0712644	0.189776	0.125236	0.484871	0.287693	0.0428268	1.11783	0.545136	0.0679363	0.0286159	0.120806	0.0770596	0.0313727	0.0712649	0.167141	0.0840736	0.223974	0.0796934	0.154856	0.0529667	0.220532	1.42761	1.25984	2.00917	1.99883	0	0.124479	0.0533479	0.0304841	0.27644	0.157103	0.205091	0.29452	0.142054	0.20262	0.0909886	0.11343
AT1G02205	AT1G02205	61.9617	71.5054	31.8332	31.9885	27.6761	23.8805	66.8223	29.6014	34.6334	19.9675	32.0366	26.7467	59.0734	81.4554	79.1946	35.9171	12.1386	10.6277	11.6509	14.1378	5.44558	5.3707	2.30617	3.48325	10.6438	11.8634	10.3519	9.12793	94.5315	84.1439	91.2635	86.1593	10.1198	9.99964	9.66858	9.49672	10.5126	8.37255	8.30463	8.55969	17.094	16.9858	20.9919	15.4738
AT1G02210	AT1G02210	0	0	0	0	0	0	0	0	0	0	0	0	0	0	0	0	0	0	0	0	0	0	0	0	0	0	0	0	0	0	0	0	0	0	0	0	0	0	0	0	0	0	0	0
AT1G02220	AT1G02220	33.4561	46.8554	59.2913	49.3303	44.784	40.217	36.4156	34.4699	12.0278	13.3888	13.2019	12.1645	17.5597	22.6426	10.5136	13.9275	3.25407	3.17318	3.12666	4.01978	12.8978	14.8304	16.0239	16.5909	2.16986	2.48022	1.90874	2.47247	2.33315	2.09692	2.21681	2.8702	4.55579	5.98107	5.85287	5.95654	10.9883	9.05834	9.63538	9.17217	3.67821	3.8479	5.53773	3.81513
AT1G02228.1	AT1G02228.1	0	0	0	0	0	0	0	0	0	0	0	0	0	0	0	0	0	0	0	0	0	0	0	0	0	0	0	0	0	0	0	0	0	0	0	0	0	0	0	0	0	0	0	0
AT1G02230	AT1G02230	5.01558	7.12189	7.268	7.01504	9.21323	5.68205	2.68536	5.85719	2.22823	1.19249	2.05197	1.15343	2.91896	3.16353	1.86686	3.58625	0.401549	0.629645	0.514919	0.440233	1.71431	2.27837	1.23593	2.35717	0.426014	0.310429	0.212357	0.386824	0.175213	0.544716	0.402764	0.483592	0.840311	0.698695	1.22984	1.22218	1.30983	1.70064	1.71304	1.70561	0.332227	1.27656	0.547194	0.625309
AT1G02250	AT1G02250	0.231569	0	0.216981	0.0512023	0.191865	0.331783	0.072044	0	0	0.124603	0.21441	0.114496	0.255663	0	0	0	0	0	0.102227	0	0	0	0	0.167132	0.0528606	0	0.0526992	0.0548546	0.0579753	0.0491559	0.0444228	0	0.0595813	0	0.0530784	0	0.0500079	0.0625239	0.204055	0.0651184	0.0471123	0	0.226323	0.0564287
AT1G02260	AT1G02260	8.90147	10.812	10.3502	10.0554	10.4503	11.5162	9.72474	11.8737	10.0744	9.95883	8.37787	8.83146	10.9412	10.1921	9.12864	12.0281	8.43762	8.46599	7.937	9.0287	15.8677	15.3249	16.102	16.7363	7.85955	7.25564	7.72858	8.04468	6.26644	5.81205	5.65819	6.19437	9.52399	8.87423	9.91206	9.54253	14.1602	14.2777	17.983	15.3658	9.82595	11.3993	11.0025	9.53547
AT1G02270	AT1G02270	25.1796	27.6933	24.7065	23.7274	21.9313	19.3285	15.5958	17.6491	17.7855	17.4463	20.7233	16.5996	16.1916	20.6157	16.8759	15.93	15.3048	13.5588	14.3471	16.2006	16.7574	16.4694	15.1731	18.256	14.2776	14.5245	15.0015	13.5088	21.2242	18.6463	18.4683	18.9311	16.3689	16.8899	17.3583	17.0669	18.208	19.2055	17.8763	16.5969	15.7503	16.1675	16.3311	14.5689
AT1G02280	AT1G02280	33.6563	29.9825	28.6506	35.5483	30.6756	30.713	36.438	31.4947	44.4018	46.0449	45.518	40.4402	51.2937	42.3687	53.903	48.8624	93.6803	96.4596	94.8222	102.181	96.7344	91.8056	101.736	95.9162	117.547	119.219	116.156	114.866	90.0771	88.7133	87.5501	88.247	89.848	98.6527	96.4364	92.6637	82.6912	80.7494	78.8958	75.3499	113.514	108.09	95.9251	93.2031
AT1G02290	AT1G02290	9.14985	10.9322	9.86292	9.47414	4.93075	6.86386	5.9247	5.83098	8.49178	9.28637	8.47184	8.12852	7.2821	8.11229	7.46304	6.71673	7.60957	7.44432	7.4217	8.70363	9.01986	9.78673	10.4619	10.1294	9.81495	8.15671	9.10782	9.02217	6.77911	5.93733	6.27894	6.65294	8.68949	8.88015	9.8554	8.88581	8.41779	9.84171	9.08965	8.49294	9.80703	10.8798	9.5678	10.4049
AT1G02300	AT1G02300	22.8646	24.3622	21.039	22.3582	11.0686	16.1368	18.8627	9.31362	15.3217	15.5378	14.177	15.3953	13.6902	10.1032	15.3641	17.3574	23.3993	24.7065	21.6844	24.8224	33.2901	28.456	27.2217	27.9364	21.4403	22.5904	21.2346	20.0583	20.7363	23.2097	21.4481	20.3286	22.0511	23.4352	25.3916	23.2041	28.3611	27.413	28.7353	28.5505	25.9244	25.9694	22.7785	21.6355
AT1G02305	AT1G02305	95.6201	111.775	103.997	98.837	85.9819	116.431	125.63	68.9282	67.9354	63.6995	60.157	68.0147	103.821	93.1202	92.6703	119.316	79.0229	78.964	82.8018	87.3121	110.033	129.896	132.206	135.352	61.5747	61.3906	60.367	61.1801	50.7504	47.5195	48.6515	50.4239	79.0414	81.1731	83.9717	80.8013	118.245	115.901	113.293	121.315	64.7606	59.471	64.7081	56.865
AT1G02310	AT1G02310	2.63064	3.85798	4.46235	2.96848	3.65771	3.01526	4.17679	2.77752	1.6061	1.07383	1.76379	2.06315	3.93924	3.79291	1.73514	2.68311	0.22306	0.301337	0.280316	0.244549	0.222203	0.208457	0.21845	0.392821	0.165655	0.289704	0.247724	0.386784	0.227105	0.0770226	0.174016	0.214908	0.980263	0.892686	0.665351	1.14059	0.470146	0.440861	0.426313	0.663224	0.479834	0.406135	0.638328	0.530511
AT1G02320	AT1G02320	0.428876	0.36119	0.401857	0	0.473788	0.491581	0	0	0.399655	0	0	0	0	0.484662	0	0	0	0	0	0	0	0	0.413124	0	0	0	0	0	0	0	0	0	0	0	0	0	0.370467	0.463187	0	0	0	0	0	0
AT1G02330	AT1G02330	36.8258	39.1437	35.9016	34.8364	48.6475	44.1224	35.2978	33.5717	34.5943	31.7429	31.3383	35.0607	31.6662	36.7674	30.1469	30.7052	32.412	28.851	29.8306	28.2091	33.7179	34.7132	33.5216	30.3918	33.4618	29.8781	28.4235	28.0051	22.4971	23.173	24.051	25.2699	33.0553	35.1843	33.9275	38.2118	36.443	32.0492	34.4456	33.5132	35.2057	33.912	30.7033	29.3314
AT1G02335	AT1G02335	44.0252	37.46	44.9437	27.8126	15.319	20.8449	20.4627	31.3686	32.4816	28.3781	32.8348	30.4223	29.6711	27.0595	25.9121	27.2495	18.1858	15.7953	15.722	20.7549	18.6542	21.5924	20.9487	17.7194	16.3978	18.634	14.2094	15.2213	22.5374	21.3608	20.5251	25.9407	26.7491	25.0293	23.4822	23.8987	24.0875	17.9223	15.9362	21.3083	21.4594	22.3158	21.5065	24.8167
AT1G02340	AT1G02340	1.25788	2.28821	1.88581	2.67004	3.27946	4.09467	3.13072	4.56018	3.00076	2.16589	2.88837	2.83604	4.66621	3.41159	3.53544	2.85898	7.42347	6.85284	7.9074	7.54178	8.31931	10.9844	9.79034	6.82707	9.46403	8.83793	7.83207	7.1989	2.62013	1.62344	1.62156	2.56285	5.38543	6.20008	6.64289	6.11559	25.5125	31.7891	27.9026	33.561	3.68514	4.25511	3.65862	3.92344
AT1G02350	AT1G02350	3.12988	3.38904	3.35166	2.1091	2.14045	1.5375	1.11285	2.19049	5.27771	4.00984	5.51991	5.01103	2.41339	2.86329	3.37451	4.40842	8.64925	5.44616	6.18475	8.67888	10.0398	12.1588	14.6439	9.89636	6.53222	5.71189	8.00467	5.08397	6.56725	6.58061	5.71825	5.82613	8.74324	7.77992	8.88217	8.43306	20.599	23.9839	20.488	23.638	8.9754	7.71092	5.24394	5.81095
AT1G02360	AT1G02360	66.9733	74.7321	97.8122	74.5112	280.103	263.818	221.399	278.157	63.2819	77.3759	63.5117	70.4212	69.3978	68.2151	35.3458	44.8498	13.3713	9.42537	11.1766	15.7353	21.0032	27.8005	25.7093	24.4836	12.2419	10.2232	9.99064	10.4583	5.55789	4.81829	6.17266	8.86414	15.852	17.0226	19.8964	15.551	19.4456	18.7227	18.2432	22.4456	10.4032	11.7882	11.2141	8.32717
AT1G02370	AT1G02370	6.84957	5.67796	5.81321	6.21662	3.84286	3.12397	1.74049	2.72317	7.11809	6.98534	7.70338	6.98612	3.64255	4.82263	3.47181	4.04752	5.82012	4.7354	4.43276	4.25387	7.59857	8.81793	7.91069	8.21343	5.5666	6.14645	4.47233	5.47076	5.20739	5.45051	4.81563	6.0322	5.42546	5.27831	5.45802	6.12492	7.34169	6.23564	6.82574	8.18858	8.22986	7.67119	6.75747	6.6764
AT1G02380	AT1G02380	4.89286	3.93121	2.79292	3.48185	4.97034	2.38511	3.63935	3.44402	4.45467	6.05232	5.31138	3.94858	2.98038	4.83019	2.54668	3.85227	3.54031	3.59636	4.76684	3.57813	4.3395	5.88041	7.04264	4.97908	2.67028	3.41261	2.04779	2.13155	4.89987	6.06459	10.9181	12.0581	3.06767	3.75383	4.38288	4.125	9.03595	7.65313	6.8059	9.04611	3.75293	2.74179	2.41848	2.41199
AT1G02390	AT1G02390	3.66089	5.36582	3.23236	1.89912	1.67215	1.85598	1.83984	1.72451	3.34585	4.01548	3.91109	2.95878	2.53907	3.02325	1.75888	1.91797	0.346235	0.292336	0.404029	0.607344	0.9916	0.485353	0.576436	0.338744	0.257131	0.262313	0.320432	0.26683	3.06687	4.84197	6.26651	8.38122	0.83324	0.572326	0.548655	0.737677	0.912204	0.836375	0.868515	0.910676	0.544277	1.36588	1.18347	0.720529
AT1G02391	AT1G02391	0	0	0	0	0	0	0	0	0	0	0	0	0	0	0	0	0	0	0	0	0	0	0	0	0	0	0	0	0	0	0	0	0	0	0	0	0	0	0	0	0	0	0	0
AT1G02400	AT1G02400	6.30918	5.8686	8.9558	8.74492	21.1697	11.657	9.37487	13.6092	4.6508	6.13102	5.49291	5.91305	21.2088	29.4771	12.4615	7.73288	4.39956	2.54162	3.99076	5.3819	8.64998	14.5527	13.5609	14.1818	1.54768	1.7543	1.58582	2.23064	0.660114	0.759585	0.830962	0.725052	9.10993	7.65524	7.7703	10.1136	10.7372	15.8653	14.4935	16.6825	7.47165	9.22845	11.6698	9.9588
AT1G02405	AT1G02405	1.31592	2.21649	1.12093	1.26966	0.792943	0.959841	0.297746	1.17214	0.334436	0.257482	0.443059	0.709789	1.23271	1.08152	0.653793	0.279351	1.29434	0.695449	0.52811	0.516012	1.46519	1.64946	0.921885	1.72682	0.109232	0.509409	0.326695	0.340057	0.838607	1.01576	0.550775	1.55879	0	0.716594	0.877456	0.752094	0.620022	2.45481	1.54609	1.61474	0.681475	0.714141	0.654747	0.583025
AT1G02410	AT1G02410	24.8748	25.8251	25.5681	26.0779	30.6186	29.3719	23.9504	32.9608	23.7295	20.827	23.3294	24.757	24.3852	23.5667	19.5043	20.4887	17.6119	17.3634	19.2642	17.6321	18.2533	16.385	16.3184	17.7983	17.7688	18.7761	16.4946	16.0517	17.2333	17.0697	19.1696	17.019	16.8831	19.4511	20.0047	19.7166	17.875	16.6168	17.0063	18.0903	18.1052	17.9749	18.5268	17.4529
AT1G02420	AT1G02420	4.61303	4.82027	3.4019	3.73995	3.16148	4.30832	2.97665	2.40643	3.74148	3.86118	4.74578	4.60393	3.64684	4.92345	3.96838	4.15588	3.48705	4.43406	4.14831	4.69812	6.27768	6.18381	4.36131	5.50789	4.29009	4.41065	4.74357	3.92578	3.93525	3.30034	3.44141	3.18758	5.18721	4.27647	5.16932	4.96785	4.27994	3.69044	4.86787	4.75642	5.45727	4.92964	5.31003	5.57887
AT1G02430	AT1G02430	3.52256	2.28202	3.38527	4.39364	4.39035	4.76227	4.15884	5.30991	2.44087	3.98525	4.18145	3.21541	3.98878	3.16419	1.76294	2.60127	0.355362	0.750106	0.717714	0.389596	0.995615	1.45293	0.609032	1.04302	0.742244	0.67307	0.657758	0.68466	0	0	0	0	0.743657	0.386456	0.993738	0.662482	1.24833	0.975481	1.5918	1.42234	0.294013	0.80878	0.353102	0.880384
AT1G02440	AT1G02440	1.87044	1.57524	2.57735	3.11396	2.30941	1.26112	1.36921	2.69511	1.23035	1.89449	2.03745	1.30562	1.78161	1.61639	1.11671	0.599491	0.108221	0.365497	0.0971427	0.237293	0.808539	1.01136	0.423939	0.635277	0.100463	0	0.100156	0.104252	0	0.186844	0	0	0.339707	0.188305	0.100877	0	0.380165	0.118828	0	0.123759	0.0895381	0	0.172053	0.107244
AT1G02450	AT1G02450	1.28187	5.59411	5.35042	8.65763	5.27823	1.33572	0.870122	2.56907	2.17188	1.75573	1.29478	1.03713	1.02927	1.84369	0.636874	2.17698	0.114622	0.193558	0.411554	0.502658	0.570909	0.937287	0.336761	1.00928	0.319215	0.124057	0	0	2.56742	2.17685	1.96725	1.51846	0.359801	0.299164	0.106844	0.244211	0.603977	0.629284	1.23225	1.17971	0.284503	0.231887	0.273344	0.113587
AT1G02460	AT1G02460	5.48367	6.61848	6.8073	6.17831	10.5724	12.8511	9.34517	11.4646	3.64538	3.53328	4.72159	4.59371	11.5686	12.907	6.46285	5.81803	0.377905	0.493117	0.370057	0.225987	0.727237	0.68225	0.87477	0.336116	0.15946	0.185913	0.286152	0.264761	1.08432	1.03799	0.750437	0.413742	0.503256	0.388554	0.704517	0.585564	0.543077	0.377222	0.779705	0.550025	0.56848	0.834022	0.901203	0.71494
AT1G02470	AT1G02470	1.31954	1.2965	3.70923	1.81542	2.51053	4.28532	4.01403	2.69354	0.956383	1.10448	0.543005	0.869904	1.29496	2.98236	1.25915	2.11127	0.432633	0.304403	0.258896	0.474311	1.52635	2.10578	2.54215	3.17454	0.468554	0.312161	0.266928	0.208384	0.440478	0.311225	0.843775	0.694701	1.65982	1.63102	1.81473	1.38263	2.59628	2.37518	1.98099	3.62816	1.07383	0.729365	3.66832	0.64309
AT1G02475	AT1G02475	55.0369	64.0111	51.2517	58.8203	49.555	74.7515	69.0818	69.8176	38.8289	37.1732	42.853	38.0501	42.357	48.3149	60.1358	51.4497	64.0132	74.3937	68.7246	65.0573	68.322	65.1092	57.3953	56.3588	63.08	62.8523	61.5901	60.3796	60.1449	52.724	56.3958	49.4386	62.5792	67.4221	67.011	75.303	56.1	59.2202	61.5539	64.8836	65.6642	61.1724	68.0234	57.0851
AT1G02480	AT1G02480	0	0	0	0	0	0	0	0	0	0	0	0	0	0	0	0	0	0	0	0	0	0	0	0	0	0	0	0	0	0	0	0	0	0	0	0	0	0	0	0	0	0	0	0
AT1G02490	AT1G02490	1.61653	1.81521	0	0.476575	0	0	0	1.31991	1.50639	0.579885	0	0.532847	1.58642	0	1.26208	0.838849	0.530006	0.894998	0	0	0	0	0	1.03708	0	1.72089	0.981016	0.510569	0.539617	0	0.413474	0	1.10913	0.92221	0.988075	0.564607	0.465458	1.16391	1.26619	0.606102	2.19253	2.14446	3.37047	2.6261
AT1G02500	AT1G02500	579.97	636.619	681.077	588.424	702.568	616.497	516.271	528.897	598.244	727.732	636.152	691.438	520.137	571.639	471.495	506.539	326.995	339.775	334.74	331.436	385.775	359.306	352.983	386.418	309.799	284.908	283.946	296.887	191.386	183.124	190.312	184.749	375.946	369.076	382.403	369.067	337.821	336.972	345.379	374.824	342.337	348.105	370.503	368.986
AT1G02510	AT1G02510	0	0	0	0	0	0	0	0	0	0	0	0	0	0	0	0	0	0	0	0	0	0	0	0	0	0	0	0	0.232542	0	0.133636	0.0687665	0	0	0	0	0	0	0	0	0	0	0	0
AT1G02520	AT1G02520	9.56013	12.4131	13.658	11.0193	8.51019	8.60577	7.0126	9.33521	9.71313	11.6729	10.8271	10.9193	5.75391	6.38649	3.21699	5.02009	4.61356	3.94946	4.31383	3.93401	6.18362	7.69114	8.17357	7.58558	3.5244	3.32886	2.96509	2.43823	0.228337	0.193601	0.112474	0.231507	4.37477	4.50158	4.74843	5.13659	6.54178	5.32959	4.80291	5.31259	4.89064	4.48849	4.35501	4.20679
AT1G02530	AT1G02530	0.204998	0.239047	0.310288	0.278936	0.139363	0.0180746	0.0196238	0.0386268	0.235115	0.390313	0.438017	0.249497	0.116065	0.160382	0.0615573	0.147292	0.0930626	0.130959	0.0417679	0.0850232	0.0965676	0.0905939	0.151899	0.136573	0.028797	0.117509	0.100482	0.0597665	0.0947501	0.0937256	0.121002	0.168115	0.0811456	0.107953	0.13012	0.132184	0.108972	0.136245	0.166745	0.177374	0.0898292	0.156892	0.172612	0.0922224
AT1G02540	AT1G02540	0	0	0	0	0	0	0	0	0	0	0	0	0	0	0	0	0	0	0	0	0	0	0	0	0	0	0	0	0	0	0	0	0	0	0	0	0	0	0	0	0	0	0	0
AT1G02550	AT1G02550	0	0	0	0	0	0	0	0	0	0	0	0	0	0	0	0	0	0	0	0	0	0	0	0	0	0	0	0	0	0	0	0	0	0	0	0	0	0	0	0	0	0	0	0
AT1G02560	AT1G02560	147.339	144.556	143.387	151.145	133.425	161.068	198.977	168.364	152.766	149.455	152.876	141.934	178.345	176.812	234.251	192.668	252.667	259.522	260.631	272.547	218.576	222.719	198.128	202.682	248.891	271.562	267.09	260.418	264.358	268.133	260.208	273.661	247.73	259.93	259.313	260.295	218.768	233.563	225.475	233.947	292.107	284.907	282.562	267.478
AT1G02570	AT1G02570	1.32213	0.527433	0.912827	0.861622	15.2977	15.7127	15.7605	13.4657	1.55627	1.79726	2.96375	2.33959	2.9706	2.28048	1.03223	2.76237	0.205333	0.577896	0.860131	0.600305	0.767041	0.959456	0.6703	0.669635	0.889528	0.888936	0.253375	0.659344	0.0696856	0	0	0	2.14848	1.36957	3.31758	1.74991	1.80326	2.78066	1.7169	3.13086	0.679541	0.761566	0.598481	1.2887
AT1G02575	AT1G02575	0	0.0591258	0.131566	0.0620927	0.542904	0.241411	0	0.687884	0.785068	0.831082	1.17006	1.04137	1.03347	1.42808	0.328872	0.874346	0	0.174913	0.12397	0.302827	0.257958	0.484002	0.0676272	0.0675601	0.192311	0.0747379	0.31954	0.133044	0	0	0	0	0.216762	0.240309	0.772415	0.514936	0.303222	0.151645	0.0824855	0.868656	0	0.0698501	0.0548921	0
AT1G02580	AT1G02580	0.0275184	0.370807	0.232063	0.0973536	0	0.283876	0.0684906	0.0674072	0.230792	0.0592287	0.0509586	0.0816366	0.243053	0	0	0.0214198	0.135335	0.091414	0.19437	0.118698	0.235927	0.347808	0.291585	0.291296	0.0251267	0.0585899	0.0751498	0	0.0275579	0.070097	0.0211158	0.0651946	0.113285	0.0470967	0.0504604	0.173005	0.0475413	0.02972	0.129327	0.0928598	0.0895771	0	0.021516	0.0268227
AT1G02590	AT1G02590	0	0	0	0	0	0	0	0	0	0	0	0	0	0	0.182301	0	0	0	0	0	0	0	0	0	0	0	0	0	0	0	0	0	0	0	0	0	0	0	0	0	0	0	0	0
AT1G02600	AT1G02600	0	0	0	0	0	0	0	0	0	0	0	0	0	0	0	0	0	0	0	0	0	0	0	0	0	0	0	0	0	0	0	0	0	0	0	0	0	0	0	0	0	0	0	0
AT1G02610	AT1G02610	3.7006	4.36319	4.66531	3.86804	25.6437	29.6916	32.5714	28.183	4.82785	5.21339	5.856	3.85902	22.9786	16.1195	29.2596	24.9291	36.9946	42.8582	42.7124	33.8834	20.1897	21.1055	25.6009	21.9496	23.837	21.0584	20.8243	18.2971	11.9937	17.8817	21.8391	24.0699	16.8269	21.1306	16.0391	14.3821	26.1541	23.9073	28.5379	28.6834	8.92504	5.82402	5.31334	4.00053
AT1G02620	AT1G02620	0	0	0	0.0811634	0.101378	0.315556	0.456803	0.674366	0.0855157	0.197515	0.509808	0	0.945619	0	0.931406	0.571443	6.67947	6.70662	7.7782	5.93752	3.70904	3.37416	5.65745	4.50381	3.93823	3.81	3.59206	4.26069	0.918998	0.467517	1.05625	1.19576	2.55003	2.90556	2.35585	1.63465	5.86599	4.9555	5.93007	4.02568	2.09105	1.73476	1.93728	1.16283
AT1G02630	AT1G02630	0	0	0	0	0	0.0949571	0.0515479	0	0.0386	0	0	0.0409613	0.121952	0.0468103	0.129359	0.161211	0.407429	0.447205	0.548582	0.402011	0.760994	0.856702	0.718216	0.956672	0.18911	0.264578	0.150826	0.353239	0.954079	1.44202	1.52567	1.17761	0.426308	0.212678	0.455735	0.303819	1.07343	1.65524	1.21669	1.02504	0.101127	0.247275	0.161935	0.121125
AT1G02640	AT1G02640	5.46518	4.49992	5.50951	5.73993	9.32578	14.2343	10.5964	10.7575	10.8677	8.74338	8.94572	10.664	46.5824	31.6523	55.4501	43.8122	90.8562	93.834	98.9392	94.9784	39.3249	52.0865	60.4237	58.6733	93.3206	97.763	96.3227	85.1432	14.3911	19.6597	25.8919	39.9991	50.722	44.8255	44.4255	38.4747	81.6036	71.2769	69.6288	53.7343	32.2842	32.5764	30.4076	25.6124
AT1G02650	AT1G02650	0.49062	0.27546	0.344784	0.614726	1.12916	0.468627	0.457914	0.801193	0.914386	1.05598	0.529976	0.606451	0.842594	0.462032	0.957612	1.14567	3.13673	2.78425	2.99611	2.24852	1.35202	1.36234	1.22089	1.53443	1.97857	2.30679	1.45148	1.66581	1.47397	2.46477	3.79607	4.84309	2.31428	2.23914	2.58649	1.62791	1.58926	1.8104	0.960726	1.70157	1.29761	1.22034	1.08688	0.797028
AT1G02660	AT1G02660	3.02054	3.03225	3.89442	3.46225	24.4525	24.1798	29.6803	18.9412	4.34596	3.97873	4.02727	3.29757	19.8844	15.0191	20.7337	14.3889	96.1653	109.029	106.696	85.7299	33.7688	41.3699	48.0433	45.9261	53.3509	61.7126	58.0933	55.6839	11.9543	18.1992	33.8579	51.18	37.7268	41.8939	36.2677	28.7631	64.9579	75.97	68.4789	61.6726	20.0187	17.0457	14.4724	11.7296
AT1G02670	AT1G02670	1.17609	0.886219	0.725	1.04018	0.820581	1.24162	1.07843	1.36462	1.09596	1.16575	0.802379	1.19361	1.68572	1.25912	1.37733	0.963626	3.74439	3.67556	2.95119	4.43885	3.03252	3.87621	3.57757	4.16969	2.71294	2.66877	2.761	3.40179	1.33275	1.02489	1.16369	1.72311	1.94302	2.54253	2.866	2.33493	4.06367	4.34537	4.83631	4.28199	2.8461	2.6482	2.83127	2.35305
AT1G02680	AT1G02680	11.747	13.1128	13.3517	15.1232	18.8131	17.1294	18.5111	18.8994	12.9546	12.8662	12.3568	11.3414	16.1668	17.4382	16.1177	14.6082	16.7504	15.7592	16.6927	14.8412	20.7724	19.6472	20.0868	17.9264	13.7725	14.1333	14.9326	13.9627	10.7894	11.2727	9.65395	10.7863	13.2343	14.8703	14.9126	13.474	19.694	15.9149	16.6601	18.6081	11.992	12.8632	12.3912	10.4338
AT1G02681	AT1G02681	0	0	0.347488	0.109332	0.136562	0.141691	0.30767	0.302804	0	0	0	0	0	0.279393	0	0.288663	0	0	0.218285	0	0.302806	0	0	0.118959	0	0.263195	0	0	0.123794	0	0	0	0.127224	0	0	0	0.106782	0	0	0.139047	0	0.245982	0.0966531	0
AT1G02690	AT1G02690	17.3715	14.9038	16.2161	19.392	15.3453	11.5963	9.63494	14.5824	24.4031	24.646	27.8914	23.4189	21.4057	20.4766	16.6611	15.7245	15.9666	13.0218	14.9353	15.6456	13.1481	13.9047	12.3777	13.0855	22.0399	19.9128	20.0774	19.943	11.2718	10.4134	11.6323	12.0614	19.0501	16.3963	17.4779	17.9634	11.7179	11.6292	10.8165	10.7944	25.335	26.6372	21.925	21.1178
AT1G02700	AT1G02700	0.183625	0.515485	0.286762	0.324811	0.202855	0	0.152342	0.149932	0.285191	0.197611	0.113346	0.242109	0.360411	0.207511	0.525664	0.333503	0.180614	0.355827	0.324249	0.264018	0.374832	0.421974	0.117921	0.412313	0.39122	0.13032	0.334307	0.115993	0.122593	0.207886	0.140902	0.435031	0.0629942	0.209512	0.0561188	0.12827	0.264362	0.132211	0.431487	0.0688485	0.448299	0.0608984	0.239287	0.119322
AT1G02710	AT1G02710	0	0	0	0	0	0	0	0	0	0	0	0	0	0	0	0	0.213095	0	0.382562	0	0	0	0	0	0	0	0	0	0	0	0	0	0.222969	0	0	0	0	0	0	0	0.176307	0	0	0.211171
AT1G02720	AT1G02720	8.13355	6.81713	7.1471	7.74434	5.88989	5.48658	5.81155	8.48411	10.4443	10.6795	12.3232	11.545	11.4002	8.53184	7.99086	8.23936	10.3734	9.59885	11.2013	11.037	9.7711	7.24389	8.28466	7.37765	11.1577	11.1444	10.3088	12.1686	8.34008	7.43482	8.21205	7.42194	11.615	10.4901	9.99054	10.5205	9.58068	8.53208	9.23613	7.31026	13.2697	12.971	12.0798	12.7833
AT1G02730	AT1G02730	21.4784	18.3504	20.6924	23.1197	8.07788	8.81248	8.57031	10.2179	29.3289	25.1916	28.202	26.7555	17.8676	18.2088	15.5429	16.4637	19.1953	15.1203	16.2771	19.0159	14.4654	13.1382	11.8969	11.9323	29.0216	31.1193	28.3373	28.8918	28.5042	27.4043	27.9664	30.6356	20.977	19.0516	20.3823	21.2541	10.8522	11.0949	9.84038	12.0153	43.704	40.9652	37.7564	37.5338
AT1G02740	AT1G02740	10.133	8.81561	10.3008	8.53933	8.39564	8.87528	7.13777	5.26865	8.64091	7.45849	8.93962	6.90076	8.79508	9.72263	9.66513	9.11509	12.5056	10.1222	9.79057	11.9063	12.7034	11.2585	11.9248	11.4071	11.0417	9.92218	11.0515	9.42018	7.70641	8.31979	7.62873	6.39794	12.1012	11.0843	11.3063	10.3671	10.6935	10.3243	11.2315	9.67741	10.7356	10.1768	10.2398	9.41097
AT1G02750	AT1G02750	14.0023	18.1824	15.6408	15.3735	24.384	26.4856	22.8329	19.4305	18.0619	16.3307	19.6706	14.5968	20.3076	16.2134	15.9404	18.1472	16.6221	14.7219	14.3724	14.6531	15.8824	18.5456	16.5444	19.4486	14.1709	12.5565	11.3649	11.3068	9.87782	7.43808	9.52708	8.66096	13.9139	12.2183	11.3834	13.949	16.7427	14.6755	14.1012	16.3707	13.3596	11.598	12.2963	10.7573
AT1G02760	AT1G02760	0	0	0	0	0	0	0	0	0	0	0	0	0	0	0	0	0	0	0	0	0	0	0	0	0	0	0	0	0	0	0	0	0	0	0	0	0	0	0	0	0	0	0	0
AT1G02770	AT1G02770	0.465848	0.261551	0.291	0.137338	0.114363	0.118657	0.128828	0.12679	0.192937	0.0557032	0.0958507	0.204739	0.0761952	0.0584937	0.161646	0.282027	0.560031	0.386877	0.365601	0.390716	0.316977	0.713684	0.398878	0.298862	0.472621	0.220409	0.329824	0.196179	0.10367	0.175799	0.19859	0.367884	0.53271	0.442933	0.522025	0.650827	0.31298	0.223608	0.851402	0.407551	0.421226	0.926976	0.647528	0.706331
AT1G02780	AT1G02780	836.459	677.566	814.072	798.423	826.44	620.012	513.731	493.996	911.782	960.841	831.151	971.489	831.651	869.04	656.49	650.843	571.088	515.702	521.697	526.402	546.65	511.218	551.157	509.243	731.374	687.095	689.063	694.59	683.893	691.953	665.399	629.314	684.083	660.054	680.678	691.665	456.48	446.769	447.952	459.806	816.257	811.414	800.785	796.656
AT1G02790	AT1G02790	0	0	0	0	0	0	0	0	0	0	0	0	0.0559745	0	0	0	0	0	0	0	0	0	0	0	0	0	0	0	0	0	0	0.0900849	0	0	0	0	0	0	0	0	0	0	0	0
AT1G02800	AT1G02800	2.64473	2.43803	0.803714	2.68681	0.552753	0.40965	1.73457	0.350181	2.46454	2.65386	2.44876	2.6153	1.15744	1.00971	1.67419	0.723293	1.5116	1.86991	1.92485	2.04262	0.875459	0.739172	0.585259	0.72225	2.1538	3.15789	2.44003	3.11551	4.3307	4.21812	4.30561	5.80001	1.36095	1.43742	1.11411	1.46049	0.802678	1.08077	1.00778	1.16582	3.2284	3.41363	3.24149	3.10041
AT1G02810	AT1G02810	16.5385	10.697	17.0772	16.7336	12.7893	9.97114	7.32695	16.4477	14.9185	17.371	21.8057	18.1207	14.1205	14.1294	5.78466	11.1739	5.23805	3.2689	4.81865	6.34903	3.0789	2.88843	2.96318	3.27854	5.67799	4.2959	4.15516	5.70413	0.529991	0.393195	0.253811	0.274272	8.06795	8.15183	9.34058	10.9867	8.02878	7.8234	5.94596	8.37127	6.29876	9.05009	7.65517	8.06018
AT1G02813	AT1G02813	0	0.0867565	0.193049	0.0911099	0.341406	0	0.128196	0	0.383982	0	0	0.407472	0.151643	0.814897	0.160854	0.0801841	0.101325	0	0	0	0	0	0	0	0	0.109665	0	0.0976088	0.51581	0	0.316186	0.36608	0	0.0881524	0	0	0	0	0	0.115872	0.0838322	0	0	0
AT1G02816	AT1G02816	10.622	16.4705	12.9972	12.8208	33.9606	31.0821	32.5798	31.8349	10.9463	11.6328	11.8019	9.45342	23.1784	23.0188	24.7814	19.9403	22.8622	26.516	24.549	24.7952	20.2796	27.9274	24.8574	27.2379	18.6559	16.3629	18.3714	17.5835	8.69751	8.85989	9.68487	10.7321	20.5777	24.5953	22.1127	23.4382	28.9834	32.256	32.5946	32.8917	20.1865	19.2093	18.0269	20.2197
AT1G02820	AT1G02820	9.73862	21.238	9.50931	9.06655	3.73715	2.115	1.91356	3.01327	6.3048	5.84694	7.78307	5.06855	4.97982	2.7803	3.04131	2.55337	4.33571	5.61884	6.60712	3.42686	0.251107	0.706721	0.59248	0.493244	2.34005	1.8552	2.51954	1.45699	13.9616	11.7506	13.6083	10.5645	1.58254	1.49128	1.97374	1.18154	0.974056	1.54998	1.32486	0.345922	0.917656	1.83586	1.20227	0.899281
AT1G02830	AT1G02830	0	0	0	0	0	0	0	0	0	0.176684	0	0	0	0	0	0	0	0	0	0	0	0	0	0	0	0	0	0	0	0.278806	0	0	0	0	0	0	0.141819	0.354628	0	0	0.133608	0	0	0
AT1G02840	AT1G02840	100.9	110.377	104.652	105.959	160.903	140.062	140.275	134.781	121.52	124.183	114.661	117.357	150.257	131.305	141.145	124.544	118.023	116.558	121.679	120.895	183.674	175.869	197.596	185.573	112.432	110.06	102.865	111.739	66.9402	64.1253	64.8618	67.9014	120.209	115.606	115.175	118.945	155.596	147.981	165.174	177.865	118.682	121.484	121.729	119.015
AT1G02850	AT1G02850	27.04	27.6523	40.2925	39.8373	81.8048	70.3409	45.6677	45.7934	7.60684	8.19649	8.098	9.18931	27.6271	39.1643	18.0668	31.6278	31.077	40.3727	30.5341	28.4513	25.9319	26.0026	28.9605	49.8678	14.3747	12.6082	10.2837	13.0868	1.35029	1.33053	1.34224	1.03603	27.0788	33.6481	35.3163	36.657	33.714	35.5399	42.4308	42.5074	26.0975	34.2633	37.7819	26.534
AT1G02860	AT1G02860	12.1176	13.8173	15.4511	14.9526	31.9253	39.1381	43.0109	38.7605	14.1635	15.326	14.3427	15.4005	25.5614	23.1053	23.3102	22.2026	19.1684	24.0692	24.449	21.4641	20.5534	27.0809	26.7545	27.2489	15.589	15.8256	14.3663	13.9675	5.62962	5.86929	8.05208	7.34965	17.0567	18.4226	20.2728	16.0566	26.0783	25.0498	25.7344	21.7332	15.3509	15.2049	13.5116	12.5012
AT1G02870	AT1G02870	27.97	21.8552	24.5962	25.2008	29.4946	24.0874	19.265	20.3342	30.3852	32.9172	33.3758	32.3918	29.394	28.6502	22.3627	20.607	22.4357	23.3528	21.2615	24.0325	30.9595	32.8252	32.0575	35.6241	25.8804	23.5658	22.0571	21.1877	23.7412	25.2096	23.1266	20.7298	28.7091	24.3188	29.484	29.8558	22.6103	25.0385	28.9961	27.6758	30.4911	32.5904	27.1901	27.4087
AT1G02880	AT1G02880	26.0875	25.3408	25.9254	24.4275	30.6752	27.4099	23.4261	31.4669	17.8182	17.5465	21.1351	19.4456	19.783	23.9532	17.7443	17.8831	11.6635	10.5043	10.9493	12.0412	15.1284	13.2843	13.5165	13.0752	10.0153	8.31044	10.3445	9.22266	9.15361	10.7397	9.62979	9.71547	13.8311	13.445	13.7258	13.2532	12.377	12.1129	11.552	11.4485	13.5903	14.4032	16.6113	15.0738
AT1G02890	AT1G02890	39.4396	45.5248	43.1526	43.582	58.4734	63.3201	55.7193	55.4422	43.3759	42.4767	41.7705	43.1325	44.3488	42.897	42.083	38.7637	48.1648	44.1241	44.6364	46.1544	48.8899	50.7728	50.7042	52.8646	41.9104	40.5249	38.428	39.766	24.8433	24.1929	24.904	25.277	43.3512	46.2573	46.0977	45.5418	50.1301	48.7227	45.0156	48.2125	43.6641	43.9492	44.0009	40.4112
AT1G02900	AT1G02900	68.8157	63.4572	80.4984	69.9158	80.2322	83.2452	73.3069	106.954	78.5353	99.7192	98.1958	106.166	99.2172	106.314	58.9975	85.2627	28.9169	21.7025	22.9765	30.9981	27.8723	37.5331	30.7317	23.7856	20.7791	17.735	15.2642	15.7853	2.39892	1.47926	2.25589	3.4825	33.2825	32.705	32.0459	32.5161	23.7962	24.1073	22.7717	33.6811	15.1523	16.7918	15.6648	19.7407
AT1G02910	AT1G02910	28.9917	29.8723	26.7858	31.622	30.149	29.007	26.6055	28.5651	30.9405	30.5026	31.5672	26.7471	29.3855	29.5139	33.6993	25.6867	48.5492	49.3982	50.1572	48.9471	38.6821	35.1726	33.1144	34.4064	48.5071	51.683	49.7596	46.6153	55.1064	49.0269	49.7746	46.9091	40.6307	44.5593	43.7695	40.7724	33.0879	31.9671	33.349	31.6995	46.7251	44.1938	47.0453	41.7566
AT1G02920	AT1G02920	516.694	806.527	1169.01	743.678	2801.84	2028.42	1296.86	1345.63	88.9178	143.761	124.066	100.423	157.72	243.697	82.9578	106.368	51.4186	57.1686	53.6168	80.4055	106.432	143.781	126.973	177.285	24.333	19.953	18.1785	21.376	15.9715	15.1043	18.9322	18.1655	110.689	118.513	133.227	146.758	166.025	135.073	132.529	140.065	45.3705	103.412	68.5307	49.9579
AT1G02930	AT1G02930	684.636	1158.77	1188.49	857.091	5496.54	3899.9	2149	3236.01	131.856	131.087	129.975	137.643	223.606	441.609	144.142	123.053	63.2736	76.5539	86.0956	94.6459	74.1107	110.682	91.5219	157.327	12.986	16.3318	11.328	11.9785	32.6391	29.9101	31.1731	27.1423	133.969	143.508	170.359	182.757	150.948	114.488	116.968	113.092	55.0293	131.74	83.5022	57.3755
AT1G02940	AT1G02940	2.53487	4.47623	2.22194	2.0973	2.07766	0.656078	0.712311	1.00149	1.52398	0.967979	1.66564	1.53634	0.240741	0.554438	0.638408	0.572833	0.160858	0.0679084	0.216587	0.264531	0.500749	0.751636	0.472601	0.472132	0.149326	0.0870489	0.223305	0.232438	0.491324	0.277721	0.439215	0.193723	0.925713	0.699731	1.04959	0.856796	0.494436	0.44156	0.38429	0.367906	0.731982	0.650847	0.767207	0.0797028
AT1G02950	AT1G02950	9.72591	13.5736	10.6104	12.5343	17.9585	19.5088	17.7228	19.7398	18.9033	17.7934	18.9109	20.4032	18.9191	17.5071	15.7833	17.1416	11.2747	6.28866	10.1205	11.8364	14.5497	12.2128	14.8561	11.8998	11.1642	7.61742	9.04318	8.75479	10.4356	10.0868	11.9408	11.5209	12.2976	10.9385	12.1656	11.4284	12.0619	14.7807	11.2638	14.5344	10.2893	9.95312	9.77714	9.4123
AT1G02952	AT1G02952	0	0	0	0	0.16504	0	0	0	0	0	0.27665	0.147733	0.219919	0	0.233276	0.232572	0.29389	0.12407	0.263804	0	0.182975	0	0	0	0.818462	0	0	0	0	0	0	0	0.153754	0.127842	0	0.156538	0.129049	0.161347	0	0	0	0	0.116808	0
AT1G02960	AT1G02960	15.2136	17.6873	13.6689	17.5718	17.5413	15.1966	16.4504	19.5432	16.5825	16.204	14.7743	14.9283	17.1564	16.7948	18.7175	17.8391	18.0416	19.0007	18.6809	20.4966	25.8183	25.8839	26.6726	27.0225	14.9627	15.6129	15.3442	15.2677	11.6714	12.3865	11.1938	11.7673	19.5618	18.4405	18.7177	18.2359	23.378	25.9767	24.7213	27.5825	20.0193	21.557	19.9374	19.4798
AT1G02965	AT1G02965	0	0	0	0	0	0.147776	0	0	0	0.138745	0	0	0.189787	0	0	0	0	0.10707	0	0	0	0	0	0	0	0	0	0	0	0	0	0	0	0.110326	0.118205	0	0	0	0	0	0.104919	0	0	0
AT1G02970	AT1G02970	3.193	1.71643	2.92819	3.0944	1.61359	1.36271	1.01452	1.74732	2.97545	3.07064	3.45961	2.75438	2.00012	2.41835	1.35252	1.48064	1.36985	0.705245	1.07967	0.91574	1.20649	1.24895	0.752571	1.01333	2.1711	1.95269	1.63881	1.77021	2.27912	2.01894	2.18945	2.29352	2.48209	2.52887	2.74063	2.77618	0.704206	1.06388	1.15737	1.56653	2.46022	3.44719	2.62932	2.68185
AT1G02980	AT1G02980	0.189649	0.319437	0.507718	0.479237	0.389088	0.279485	0.101146	0.530915	0.252468	0.0583124	0.10034	0.0267912	0.119646	0.183701	0.0423045	0.105442	0	0	0.0239204	0.0584311	0.0331824	0.0311297	0.0260976	0.0260718	0	0.0288417	0.0493248	0.0256711	0.0813947	0	0.0207892	0.064186	0.139416	0.023184	0.0248399	0.028388	0.0468058	0	0.127326	0.152372	0.110239	0.0539109	0.105915	0.0264078
AT1G02990	AT1G02990	10.7084	11.4846	9.83204	11.223	12.3531	12.0602	11.111	11.5682	9.01571	9.46947	9.30354	9.35431	10.5019	11.1118	11.1174	9.06146	9.44562	8.8216	8.64344	10.4949	10.6716	10.6712	9.81733	9.90429	7.53643	7.91562	7.70942	6.93663	6.65564	6.82541	7.26968	6.3764	8.81962	9.21265	8.76512	8.82892	10.7628	10.4644	10.0517	11.157	9.46205	9.02606	8.8328	8.28299
AT1G03000	AT1G03000	12.2022	12.1947	13.2438	13.724	11.9523	12.8207	12.5276	11.5075	13.3797	12.6501	14.7251	11.5636	14.31	13.2148	14.9569	13.5346	18.4232	18.4433	17.2555	18.948	17.0123	17.5723	18.591	19.6293	19.3122	19.1602	20.6232	19.135	13.3398	12.4502	13.9199	13.7316	18.1257	18.7256	18.8324	17.6015	18.2173	17.2857	17.5622	18.003	19.7277	20.6994	18.5247	16.4133
AT1G03010	AT1G03010	1.02121	0.885337	1.71675	1.22198	1.69223	1.79021	1.12133	2.50148	1.79131	2.26263	3.28157	2.70282	4.37721	3.49608	2.43879	3.29645	0.561317	0.648543	0.477337	0.744948	2.35436	2.1742	2.57499	2.68805	0.630776	0.41567	0.464802	0.597651	0.481259	0.637574	0.507042	0.391369	1.36012	1.64495	1.67982	1.60505	3.08746	2.49777	2.22322	2.02708	0.488855	0.418368	0.704522	0.585525
AT1G03020	AT1G03020	2.24431	2.4056	2.86762	2.52631	0.450789	0.701576	1.26951	0	1.52102	1.31741	2.26691	1.21055	0.901026	1.61397	1.27434	1.4293	0.401364	0.677766	1.08083	1.76012	1.99911	0.93772	0.393069	0.981698	0.558885	0.651599	0.371453	1.15993	4.49506	6.58307	6.57543	3.14189	1.25988	0.698372	0	0.855132	0.528724	0.661054	0.719145	0.229495	0.332073	1.01497	0.159525	0.19887
AT1G03022	AT1G03022	0	0	0	0	0	0	0	0	0	0	0	0	0	0	0	0	0	0	0	0	0	0	0	0	0	0	0	0	0	0	0	0	0	0	0	0	0	0	0	0	0	0	0	0
AT1G03030	AT1G03030	17.0619	22.5012	21.2136	22.7183	24.4929	25.4664	23.7993	19.9783	15.8121	16.2428	15.8844	16.9648	23.3222	21.8768	17.8587	17.6224	14.5691	14.7535	13.9053	17.489	16.9357	19.0118	16.9771	18.0428	14.8942	16.1674	15.4461	15.6337	9.05954	9.11415	10.5745	11.5491	19.6341	18.6115	21.316	18.3688	16.4388	17.3132	16.3013	17.768	20.3314	18.1414	18.9842	18.5038
AT1G03040	AT1G03040	38.9676	44.1847	43.856	45.2081	53.6781	48.6074	36.9523	41.487	34.2839	33.1267	35.3141	33.2382	37.2377	41.8222	30.0834	29.3487	27.9219	27.2634	28.4849	30.5649	35.3549	35.469	34.6005	36.5355	24.5288	23.9629	24.6124	24.7115	24.2425	21.4419	21.3818	20.991	30.4256	30.6632	30.8173	32.2083	37.3463	34.3264	37.1894	38.6892	35.5736	35.5213	37.3102	34.5873
AT1G03050	AT1G03050	0	0	0	0	0	0	0	0	0	0	0	0	0	0	0	0	0	0	0	0	0	0	0	0	0	0	0	0	0	0	0.0244202	0	0	0	0	0	0	0	0	0	0	0	0	0
AT1G03055	AT1G03055	5.44271	4.91115	4.18914	5.67335	1.21685	1.33682	1.77393	1.42844	5.91719	4.95077	6.23926	5.9588	2.003	2.26989	2.27642	2.47128	2.93165	2.79813	2.97478	3.21407	0.793582	1.19118	0.686558	0.561172	3.66808	3.58681	3.77484	3.86784	7.65668	6.65696	6.66232	5.21918	1.46706	1.5525	1.06931	1.76519	1.00746	0.209934	0.837401	0.437291	1.10731	0.773591	1.1652	1.0105
AT1G03060	AT1G03060	12.7819	14.5753	15.2387	14.8774	19.7168	18.7051	15.5037	18.8049	13.3928	13.9115	12.7388	13.9527	14.8161	14.7156	11.4733	12.4766	13.0497	11.3935	10.6843	12.6584	14.9853	16.7507	16.5474	17.186	9.46005	10.3464	9.05026	9.95963	8.34725	8.15751	8.30105	8.82947	12.4773	12.9812	12.9979	13.8315	17.634	16.986	16.6891	17.8917	13.6844	13.2112	12.4759	12.127
AT1G03070	AT1G03070	1.33879	4.04875	2.10975	1.34554	0.60504	0.976518	0.833027	1.49064	1.81465	1.57173	2.81723	2.40707	1.61245	2.54447	1.85292	1.51576	1.4964	0.707532	0.537285	1.96866	1.04345	0.699217	0.468951	0.76129	0.555648	0.323913	0.609347	0.403626	0.182824	0.568376	0.513649	0.576682	0.814182	1.35394	1.50643	1.46656	1.10389	1.18301	0.428988	1.30055	0.940928	1.02928	1.09434	2.01673
AT1G03080	AT1G03080	43.052	50.9937	46.3027	47.0007	72.7916	76.4575	66.269	72.0727	37.2919	37.2825	37.6331	39.6709	61.3366	67.5687	48.8608	43.6572	36.1729	35.4435	35.4297	39.8473	42.1212	46.4362	47.2938	50.4305	27.9396	27.9059	25.7232	26.7128	16.9505	15.5011	16.4038	16.8994	30.7226	31.1694	33.0228	31.4978	48.3728	46.3539	46.2821	47.004	29.937	30.5753	29.3043	27.0936
AT1G03090	AT1G03090	16.887	22.7138	20.7764	20.2387	190.366	237.125	256.901	183.445	17.3329	14.9599	14.0494	15.8762	163.527	86.6504	201.929	134.702	265.471	336.929	340.956	327.915	257.095	358.623	451.768	435.681	206.975	226.877	238.09	223.572	14.7789	15.0036	17.8031	20.5545	107.88	118.726	120.833	93.3698	406.537	390.478	412.226	366.269	75.9024	68.4233	68.6965	64.5281
AT1G03100	AT1G03100	2.35659	1.6573	1.38861	1.61154	1.07355	0.751862	0.634904	0.892658	1.74323	1.621	1.66459	2.16219	1.50206	1.75711	0.910451	0.888792	1.40988	0.786874	0.9438	1.07413	1.48777	1.47948	1.19352	1.51965	1.61937	1.26729	1.08365	1.28911	1.92203	1.2377	1.92014	1.46771	2.1753	1.53844	1.62604	2.39289	1.07028	1.25944	1.51284	1.6123	3.10402	3.02145	2.27945	1.98916
AT1G03103	AT1G03103	0	0	0	0	0.217646	0	0	0	0	0	0	0	0	0	0	0	0	0	0	0	0	0	0	0	0	0	0	0	0	0	0	0	0	0	0	0	0	0	0	0	0	0	0	0
AT1G03106	AT1G03106	0	0	0.0633151	0.119527	0.298593	0.46471	0.33636	0.16552	0.0629681	0.0727187	0	0.26728	0.0994702	0.152723	0.158268	0.15779	0.0664638	0.0561172	0.05966	0.0728666	0.165521	0.310563	0.13018	0.260103	0	0.0719343	0	0.128053	0	0	0	0	0	0	0	0	0.0583693	0	0	0	0.109979	0.0672298	0.105666	0
AT1G03110	AT1G03110	11.4077	9.77708	10.9157	11.4442	9.35156	5.82165	5.518	5.1345	12.2457	14.1419	13.4363	15.5858	9.31618	11.3428	6.26281	7.05968	8.08835	6.69532	7.61626	7.65044	8.49173	7.73484	7.14461	6.71083	11.3364	10.5135	9.57713	8.82299	11.303	10.0969	10.1764	9.64542	9.37583	8.96855	9.83084	10.6015	5.98905	5.48539	7.10409	6.12109	11.2517	12.7536	12.3863	10.0584
AT1G03120	AT1G03120	0.689013	0.870409	0.860808	1.11722	0.380584	0.789752	1.00035	0.843879	0.856091	1.48298	1.06326	0.908461	2.36663	1.81682	1.88278	0.357542	1.35543	0.953686	1.82501	2.47667	0.984533	1.31947	0.884943	0.884065	1.25826	2.32273	1.98615	1.84977	0.805002	0.682541	1.58611	0.544119	0.945487	0.491341	0.526434	1.08293	0.892764	1.36425	1.61906	1.55003	0.841071	1.25679	1.16723	1.00739
AT1G03130	AT1G03130	1808.22	1301.6	1408.08	1540.32	1083.2	1483	1872.56	2071.82	1921.54	1851.63	1821.08	1692.21	1256.93	937.211	1852.75	2346.8	2312.4	2100.22	2123.8	2223.29	1253.71	852.294	801.053	751.765	2658.13	2569.54	2442.97	2485.23	3052.57	3042.31	2798.94	3081.74	2144.52	1900.14	1721.76	1822.1	1115.24	1090.71	1012.76	1026.66	1847.28	1916.57	1642.48	1816.04
AT1G03140	AT1G03140	37.7919	40.8055	40.1189	42.2348	81.2788	72.9134	65.8965	74.914	40.184	39.918	39.8862	40.8276	65.9223	54.6559	56.6573	56.1802	60.6356	59.8681	61.4103	62.3781	65.5502	67.9209	77.395	74.4593	55.411	56.0452	50.5488	54.3549	29.0518	27.2291	26.954	29.9653	54.5422	56.4168	57.8024	50.8146	69.63	68.1357	65.0889	70.0294	47.8565	43.3383	46.1503	42.2022
AT1G03150	AT1G03150	19.6007	20.5805	21.3076	22.5889	24.3717	20.3268	24.1809	22.2396	26.1723	23.9243	24.8262	23.7458	22.1085	19.7531	21.5302	25.5601	22.5342	22.1973	26.1458	24.9795	33.3596	30.711	35.7182	28.4156	25.4124	19.8724	21.0866	19.939	22.6879	20.1731	21.6164	21.5096	24.8882	24.9779	22.3274	21.4269	38.9199	32.6239	43.1671	37.2227	25.3419	22.625	26.471	22.3307
AT1G03160	AT1G03160	23.1359	23.0023	20.9888	23.3144	14.7757	18.6051	22.5699	19.6152	21.7209	21.9867	25.1287	19.3257	18.5102	18.1232	18.5699	17.7052	27.7803	25.4328	25.7199	28.6128	26.9048	26.7325	25.2257	24.5342	28.417	27.6246	26.7541	27.4177	35.8048	33.9046	34.36	33.7638	27.4415	25.9097	28.2563	25.3759	22.9762	23.5376	23.0124	22.8346	30.3992	32.6224	28.2424	27.2552
AT1G03170	AT1G03170	0.0598715	0.705916	0.0560997	0.476575	0.595272	0.0686252	0.223521	0.439971	0.613715	0.0644317	0.77609	0.888079	0.352538	0.202978	0.514182	0.186411	0.176669	0.397777	0.158583	0.322814	0.293316	0.894307	0.288363	0.345692	0.218671	0.254947	0.109002	0.453839	1.01928	0.406691	1.1026	0.709215	0.431328	0.358637	0.274465	0.439138	0.41374	0.517292	0.703437	0.538757	0.730845	0.595683	0.561744	0.700294
AT1G03180	AT1G03180	3.64561	2.98838	2.55057	3.00937	3.59779	3.00861	2.41961	2.26227	2.58189	3.13862	4.14057	2.35529	3.36304	2.91133	2.80831	2.00528	2.67741	2.22024	2.61791	2.83051	1.96462	2.2899	1.73244	1.68395	2.26355	3.57048	2.74336	2.07259	1.50901	1.69218	2.01413	2.01528	2.70142	2.41253	2.62941	2.64847	1.80549	1.04994	1.82753	2.02299	3.36234	2.32137	3.53451	2.36896
AT1G03190	AT1G03190	6.04769	7.92281	7.39817	7.02563	7.1052	7.20698	6.03278	7.05428	7.84964	6.92153	7.42162	7.52295	6.46496	6.96994	6.87636	5.32383	6.16094	6.45748	6.01759	4.99468	6.49586	6.67309	7.79054	8.17541	5.91648	5.82495	6.00765	5.48021	4.8547	5.19617	4.58535	4.66219	7.40967	6.85918	7.12904	6.89005	6.88247	6.84255	6.68255	6.72157	7.10892	8.26151	8.18111	7.3217
AT1G03200	AT1G03200	13.1821	14.4804	13.4257	11.6588	16.6203	12.4817	13.7298	14.3901	11.0822	12.3357	10.8786	8.92641	16.241	12.7918	13.9833	11.599	7.32854	9.9955	8.72893	8.65258	16.6715	13.8292	16.4245	14.4778	6.80316	7.93173	5.08679	4.88754	4.44816	4.98809	3.51828	4.07348	8.70036	8.82806	7.88215	8.85791	17.204	19.3433	13.636	17.7285	7.6958	9.26625	6.83381	7.68135
AT1G03210	AT1G03210	25.9208	25.2216	31.286	35.9424	39.1511	37.6838	31.1637	31.3882	32.6157	33.2535	28.8814	34.1765	39.5583	40.3806	28.3551	36.0208	19.3738	15.5065	18.7482	19.1083	37.2177	40.0475	42.32	42.7008	15.0432	14.5766	15.0639	13.8761	10.5592	11.3776	10.5068	11.189	20.1208	23.3091	22.557	23.9377	31.8149	36.9307	38.8856	41.4282	18.1148	20.3985	19.0646	21.7683
AT1G03220	AT1G03220	717.927	987.184	811.655	646.079	2373.64	2394.72	2457.62	3824.92	551.898	545.832	575.49	579.262	803.346	902.3	482.368	532.679	267.254	234.274	262.124	305.397	253.297	321.004	295.39	311.156	191.395	188.009	168.417	186.003	47.7434	55.2801	59.6326	79.2686	219.376	219.887	203.253	216.57	232.819	206.09	185.616	223.727	146.338	170.465	171.205	176.842
AT1G03230	AT1G03230	43.1491	35.6323	46.8021	42.6547	194.566	151.405	137.376	217.456	40.9524	47.068	50.7558	43.3746	81.8074	78.7398	46.0097	53.6793	49.6251	46.8498	46.6574	57.891	32.593	32.1683	28.7877	30.6576	51.9313	50.8052	51.3524	51.0267	19.6299	21.5976	20.9352	25.6558	60.953	55.2423	56.9173	58.8022	36.6925	33.3643	30.1811	34.3711	61.2453	60.7626	64.2582	66.6467
AT1G03240	AT1G03240	0.266574	0.112251	0.12489	0.235769	0.147245	0	0.165869	0	0.745234	0.430316	0.740462	0.131804	0.392413	0.150624	0.312186	0.311243	0.131101	0.110692	0.353041	0.143731	0	0	0.385175	0.128264	0.365107	0	0.121331	0	0.133478	0.226346	0.102276	0.47366	0.274351	0.114058	0.366611	0.13966	0.115134	0	0.313201	0	0.433872	0.397835	0.208427	0
AT1G03250	AT1G03250	30.1867	30.2821	30.4376	29.7698	30.1016	30.5584	26.1298	30.886	28.2295	28.2311	26.7131	26.3638	26.5047	30.7321	25.6952	23.9125	19.1813	22.7622	22.3594	24.9469	22.0522	21.7931	21.564	22.7766	23.3676	21.7838	22.1776	23.7934	24.7725	19.0079	22.0974	21.5181	25.5687	23.8657	27.1867	25.9197	24.5987	22.273	23.1632	22.1756	26.1744	27.4822	29.3252	25.8823
AT1G03260	AT1G03260	8.2829	7.21485	8.07153	8.28854	11.8692	9.76518	8.95293	9.73882	8.68889	9.21939	9.29061	8.19073	12.0536	9.7882	8.57307	7.69984	9.54369	9.6303	7.89809	9.6975	10.6664	11.1486	10.8054	11.068	6.87152	9.42226	8.74628	7.71374	7.86819	6.06842	6.8279	6.78403	9.25523	10.3686	11.4129	10.5139	7.97254	8.7411	10.677	11.4463	9.47531	9.79495	8.95565	9.45752
AT1G03270	AT1G03270	3.99283	3.82284	3.2687	3.30838	2.8323	2.26422	3.39976	1.75021	4.38661	4.97541	3.81371	5.31995	3.40288	3.60976	3.44549	3.00979	2.68713	3.24616	3.08001	3.21794	4.99327	3.2356	3.44132	3.84237	3.56904	4.20585	3.29033	3.66385	4.58782	4.28246	3.64436	4.72976	3.11443	4.06418	3.46814	3.52314	3.44904	2.9959	2.96288	3.97118	4.03602	4.55804	4.33779	3.60512
AT1G03280	AT1G03280	30.0797	29.9968	29.3656	28.6569	34.8417	35.0478	31.9437	33.1443	29.2974	28.5162	25.8549	26.1376	32.2696	28.9329	33.0386	27.5437	28.6404	29.0568	31.2719	29.7187	33.1852	34.2189	32.3293	35.2014	28.0104	28.3852	25.3286	25.8618	19.2627	16.5858	18.4752	17.5996	30.2064	30.8484	29.7982	30.2669	33.059	33.5607	31.6394	31.6707	31.7926	33.9529	31.7125	30.1597
AT1G03290	AT1G03290	25.8462	38.3216	32.2322	37.5763	46.1449	49.0543	47.6851	47.0832	23.2157	22.9614	19.8705	20.9451	32.0493	37.7842	30.1835	34.1596	22.2101	24.0477	24.6597	22.069	34.3603	35.5226	36.1319	40.1966	14.228	14.1381	14.1562	14.1458	12.3342	10.6956	11.8375	11.9002	16.9652	19.4558	22.3852	19.9774	38.3386	37.7896	39.1006	39.9175	15.3384	16.4318	16.2689	13.4301
AT1G03300	AT1G03300	3.72694	2.66398	2.78784	2.65916	0.484379	1.00514	1.09129	0.537014	3.47301	3.47153	4.17572	4.11905	1.4292	2.05277	2.1273	3.14475	5.69895	5.51404	6.02806	5.50496	6.71272	7.48499	7.81364	8.25797	6.83461	6.46808	6.47163	4.71839	5.11228	5.6908	7.85846	8.56988	5.41506	6.3785	6.54692	6.26789	7.35854	7.61049	7.35936	6.37627	7.92645	6.79291	6.63608	5.46433
AT1G03310	AT1G03310	41.2067	49.2069	34.0032	37.2615	5.1476	8.4667	10.3147	5.47027	26.7533	24.3332	28.9479	24.8014	8.88229	11.3565	11.6347	12.2682	13.5596	12.7505	12.873	13.3839	15.4378	11.6208	10.5697	10.4559	15.0775	15.4986	14.191	15.2597	36.3199	35.1523	32.4926	29.4041	15.2486	15.4902	15.9272	18.1572	8.3654	9.27637	9.05716	10.6516	19.0298	18.3732	20.0127	16.3046
AT1G03320	AT1G03320	0.38036	0.240249	0.0890995	0.168203	0	0.108993	0.118335	0.465852	0.443056	0.204665	0	0.658223	0	0.214918	0.0742402	0.222048	0.841774	0.394852	0	0.205082	0.465855	0	0.183195	0	0.607777	0.303686	0.346241	0.720804	1.23794	0.16148	0.145932	0.788481	0.293593	0.732343	0.697465	0.398546	0.328559	0	0.111722	0.427837	0.773836	0.378434	0.743485	0.834174
AT1G03330	AT1G03330	39.251	35.5429	37.5919	40.3218	44.5126	39.1172	39.228	24.6747	40.4609	42.0536	35.3776	42.0773	44.2297	45.6323	39.7295	37.379	35.1052	33.102	32.9683	33.2431	37.5442	37.8159	42.9119	40.1117	28.7826	33.3724	32.6471	32.1722	31.9154	26.6179	26.054	23.7619	36.1063	36.7093	35.191	36.3961	37.1309	40.6093	34.7914	35.75	38.161	37.8426	35.8495	33.434
AT1G03340	AT1G03340	4.51707	4.90862	4.05046	3.35071	1.98531	3.00629	2.05509	1.66565	2.71568	2.71804	2.33852	1.68106	3.57495	3.01887	3.03367	3.36477	2.10206	2.05719	1.45804	1.93793	2.4985	1.56263	2.4797	2.00983	1.99571	2.32678	2.29911	2.66928	2.43202	2.55694	3.76427	2.07126	2.4494	1.95348	2.18206	3.00268	1.72019	2.46546	2.39678	2.73166	2.92496	3.3344	3.75964	3.17196
AT1G03350	AT1G03350	34.8613	38.9141	33.4388	35.1512	41.6057	39.5468	34.2686	37.5521	37.8391	33.9619	36.1674	36.3905	33.5073	37.5701	30.497	30.2373	27.5446	25.0159	26.7853	28.7657	36.9808	32.053	33.408	34.895	26.8157	25.7604	25.8841	25.0377	24.9161	20.2417	20.3038	21.0092	31.8878	31.368	34.925	31.5623	33.6179	33.5014	33.7879	35.5781	31.759	32.47	30.8783	31.6353
AT1G03360	AT1G03360	13.0678	10.7534	9.81434	12.4841	11.516	8.28959	6.3311	6.84183	15.8958	16.7469	15.8863	16.227	10.8665	9.75113	7.67135	8.19172	12.3138	10.9768	9.86428	10.5957	12.8285	12.6653	15.3745	11.6634	13.2527	13.0619	12.2588	12.5239	10.9388	9.95231	11.9793	10.2804	13.6031	11.9508	11.9355	12.7519	8.65995	10.989	10.1966	10.7156	14.3281	14.2919	13.5322	14.3904
AT1G03365	AT1G03365	12.0043	13.2176	11.6854	12.3866	11.1494	11.7465	10.6784	15.1381	12.2015	13.4688	13.4612	12.1345	11.6498	11.0787	10.8995	10.6762	12.4196	11.8893	11.9333	12.0579	14.9748	16.6283	15.8033	15.7234	10.7985	11.17	12.3642	11.4797	8.70446	7.73893	7.64197	8.71622	13.4984	13.8297	12.9424	12.6481	14.1907	13.5409	14.2868	14.9029	13.2424	14.3543	13.2619	12.5892
AT1G03370	AT1G03370	16.5265	20.2434	18.4319	19.2472	45.9015	35.1629	28.5389	33.4755	14.9016	15.157	14.0628	12.0584	21.6932	25.6135	16.4419	19.5692	14.5772	14.3083	16.8214	15.6929	16.8403	20.9879	19.3676	23.5819	12.0048	12.4827	10.4303	10.2704	10.1177	10.1125	10.6918	11.1555	12.9458	14.7434	14.5081	14.5649	20.4888	19.9803	21.8344	21.2234	12.9999	14.5122	13.1832	12.8152
AT1G03380	AT1G03380	21.3697	26.5902	24.8037	25.3546	35.4206	42.1724	42.3603	34.4695	21.4249	20.5976	22.1793	20.6474	30.8358	28.5019	28.2772	32.5705	25.1233	26.6697	27.8463	29.2924	33.8697	36.7435	34.4978	35.4065	18.5406	18.8468	18.4686	18.4076	13.077	11.9483	12.3274	12.7669	22.4799	22.7824	24.7968	23.5242	32.2053	32.8219	32.9473	32.9488	20.5524	19.6647	19.3368	19.6768
AT1G03390	AT1G03390	0	0	0	0	0	0	0	0	0	0	0	0	0.0669594	0	0.0710263	0	0	0	0.0401607	0	0	0	0	0.0437727	0	0	0	0	0.546625	0	0.139614	0.26941	0	0	0	0	0	0.0491259	0	0	0	0	0	0
AT1G03400	AT1G03400	17.5464	24.9581	20.8858	25.0827	12.8475	16.8378	23.6764	20.3658	18.9176	16.1931	13.0348	14.5266	17.7953	16.1973	18.7965	26.1641	19.3658	21.8156	23.3729	20.4614	31.7983	38.7982	35.8676	36.0283	15.8351	15.3669	15.6474	17.109	26.4596	24.8597	25.4407	29.1229	11.3915	13.2254	11.785	10.7426	40.5796	39.2225	46.2051	39.8174	8.88296	9.84524	9.49171	8.70056
AT1G03410	AT1G03410	5.20618	4.86503	4.47725	4.20507	6.72307	4.87744	4.88131	4.48382	4.29765	6.03762	5.76687	4.67809	5.1792	5.64159	6.94146	5.92129	6.50037	5.90304	6.54856	7.58802	11.1514	8.19445	7.96899	9.40232	6.72896	6.57987	6.55694	5.7439	7.78476	6.19681	6.56693	6.16705	6.16545	6.32663	6.19	5.92837	7.47471	7.95907	9.2171	9.30545	6.28742	6.90641	7.0817	6.78925
AT1G03420.1	AT1G03420.1	16.6401	13.7178	15.2623	17.7746	8.9324	7.65605	7.36436	8.32429	21.9491	24.4021	31.5735	24.4506	20.7002	18.2748	14.867	15.4606	14.984	12.2135	13.2949	14.9743	14.7111	14.8109	14.505	15.9002	16.8523	16.7787	16.5341	17.8766	17.7201	16.2682	15.4661	16.0327	15.1959	15.4929	15.7936	15.9622	13.3616	12.4027	15.076	13.1151	20.0739	17.7217	17.729	16.2194
AT1G03430	AT1G03430	22.0195	23.2064	24.5513	26.7645	27.3152	26.1554	24.1874	23.3528	20.118	22.0418	23.1214	21.5312	26.1667	25.9958	24.6346	26.2838	18.815	19.0019	18.0293	17.9081	21.2437	19.5055	17.9521	21.7224	16.1183	16.5004	16.8529	16.3183	16.2612	16.8687	15.9996	15.4461	15.8254	16.7374	18.384	18.6899	21.3053	18.2677	21.8241	20.8937	16.4678	15.2377	19.092	16.6067
AT1G03440	AT1G03440	11.308	10.0966	9.70965	12.9782	3.17526	5.0718	5.88302	6.1142	16.3878	14.7333	18.4189	14.3236	7.68278	5.4278	7.91319	8.21312	10.2669	8.51161	9.75016	9.86938	13.6181	14.7746	12.6049	12.7743	9.15103	8.05215	8.50341	8.42118	14.5434	14.6752	14.1037	14.8734	9.92527	9.0293	9.05005	9.82761	11.0747	12.5394	11.9084	14.2509	8.58679	9.51981	8.57528	9.47382
AT1G03445	AT1G03445	0.18495	0.0973505	0.108311	0.163577	0.229858	0.0529977	0.14385	0.05663	0.129261	0.149277	0.171245	0.0685843	0	0.261259	0.162446	0.0899755	0.0909581	0	0	0.0997207	0.0566304	0.0796908	0.0668088	0.0222475	0	0.0492224	0.105224	0.0657168	0.0694556	0.0392598	0.0177398	0	0.0237932	0.0395668	0.063589	0.024224	0.0199701	0.0249683	0.0271624	0	0.112883	0.0460032	0.0903797	0.0450685
AT1G03457	AT1G03457	5.83884	6.56684	7.65248	7.2559	6.69524	7.28553	6.99021	7.69434	11.0887	12.2092	10.6755	10.7072	12.0223	10.3986	10.2713	10.643	12.9038	12.3067	12.4638	11.3573	8.9617	9.34148	10.5724	12.2689	12.2149	14.1625	12.884	13.446	4.92203	4.80082	5.86982	5.99719	9.12788	9.04425	9.41915	8.32513	11.013	11.0554	11.3756	9.89304	8.75137	9.66986	9.39053	8.93306
AT1G03470	AT1G03470	6.09103	7.05887	4.39023	7.22891	5.23358	7.04125	6.02511	6.88622	6.45223	5.32239	7.13395	5.14807	7.12711	5.29486	7.35677	7.98292	13.7745	14.6566	13.7433	15.326	13.9001	12.9206	16.599	14.8291	14.7835	17.7901	13.601	16.4757	5.89122	6.63056	7.59002	10.9153	9.6442	11.8947	10.7872	10.8553	13.491	13.7189	14.1293	15.3422	14.7858	14.8656	14.7757	10.6055
AT1G03475	AT1G03475	102.404	97.4996	92.6075	112.212	90.2812	98.5622	96.5528	127.554	114.374	117.373	122.39	106.948	95.6258	103.965	114.997	110.278	164.962	159.929	159.146	160.9	177.468	165.789	157.359	155.234	199.928	212.932	213.427	202.849	195.03	202.404	196.446	203.979	197.027	197.653	194.923	208.031	151.642	140.879	137.197	141.485	254.578	253.804	242.006	240.456
AT1G03490	AT1G03490	0	0	0	0	0	0	0	0	0	0	0	0	0	0	0	0	0	0	0	0	0	0	0	0	0	0	0	0	0	0.0632751	0	0	0	0	0	0	0	0	0	0	0	0	0	0
AT1G03495	AT1G03495	12.2347	20.9107	8.05847	10.5663	1.90813	4.00083	2.95553	2.99693	4.15805	3.02056	3.66498	4.80384	1.4832	2.5619	2.07898	1.31645	0.212365	0.298844	0.254168	0.232824	3.17324	2.56348	2.14909	2.00845	0.295712	0.30646	0.262052	0.170481	1.11712	0.97773	0.828363	0.682013	0.222206	0.0923789	0.164961	0.263934	1.36768	1.39908	1.01468	0.971424	0.819948	0.429626	0.590842	0.0701494
AT1G03502	AT1G03502	0.553024	2.79447	1.03637	0.978233	0	0	0.68821	1.35465	0.515344	0	3.07227	0.54687	3.25634	1.24992	2.59059	0.430462	2.17581	1.37783	0.48827	1.78907	2.03199	3.81257	0.532712	2.12874	3.02975	2.3549	0	0	0	0.469568	0.848709	0.655091	1.70747	0.946478	0	0	0.477707	0.597268	1.94926	3.11026	2.70028	1.10045	2.59437	1.07808
AT1G03506	AT1G03506	5.07256	6.10287	4.753	5.12729	3.20215	4.15301	1.80359	8.87528	7.42807	1.55969	9.39337	5.01612	6.40039	3.27564	10.7495	5.64054	4.2766	3.61085	4.47861	7.03289	6.21274	9.15894	11.1686	7.67079	6.61669	4.6286	1.97895	3.43314	2.17707	1.23059	1.66815	0.858395	4.47476	4.96085	0.664396	3.03719	5.00769	7.82627	9.36542	6.52082	4.71773	3.60491	5.66587	3.53166
AT1G03510	AT1G03510	1.51503	0.617383	1.64855	1.38318	1.24177	1.34442	1.33801	0.957705	1.54843	1.73561	2.44352	1.15987	1.15108	1.32549	0.9539	0.798857	2.16316	1.17703	1.63968	2.16075	1.55628	1.68463	1.88308	2.0223	2.36508	2.08108	2.26888	1.99122	1.46826	1.82585	1.20004	1.15784	1.76042	2.21652	2.28521	2.30438	1.73085	1.53067	1.26324	1.42927	2.62492	2.77159	1.68131	1.81018
AT1G03515	AT1G03515	0	0	0	0	0	0	0	0	0	0	0	0	0	0	0	0	0	0	0	0	0	0	0	0	0	0	0	0	0	0	0	0	0	0	0	0	0	0	0	0	0	0	0	0
AT1G03520	AT1G03520	6.48774	8.39641	7.2124	6.93749	8.4629	9.53695	12.0421	10.5048	6.45559	7.65246	7.39845	6.77801	12.5719	10.9353	13.4214	11.9543	14.8898	14.9158	15.3396	16.5614	15.3084	16.4251	17.5479	17.4247	12.6175	11.7451	11.945	11.6695	7.378	7.12706	7.95961	8.72718	9.58171	11.9818	10.8884	10.0625	19.3138	16.5075	18.7333	16.5741	9.3662	9.15353	9.19946	8.21726
AT1G03530	AT1G03530	12.8707	10.6761	11.1741	12.8411	8.00631	5.27868	4.19276	8.90599	14.4784	15.677	16.0689	15.3401	8.42067	9.58702	6.90725	7.6788	10.7762	9.09863	8.96682	8.91301	15.4668	13.9809	14.7562	12.619	11.7521	9.75369	8.25207	9.34748	10.9473	9.48776	9.41117	8.9582	11.9989	11.4702	11.8894	12.8258	10.8247	11.0994	11.6761	12.078	14.3797	12.4679	11.9395	12.7107
AT1G03540	AT1G03540	1.79143	1.82786	1.22665	1.43207	1.44622	0.908215	1.02893	1.43459	1.99041	1.81666	2.04146	1.9759	1.97783	1.713	1.77519	0.938548	2.23645	2.40329	2.15959	2.34045	1.89874	2.4938	2.42253	2.61904	2.2334	2.12713	2.50883	2.21972	1.8285	1.87211	1.55968	1.99964	1.98552	2.24052	2.77957	2.34636	1.84505	1.71152	2.22621	1.86004	2.91571	3.29051	3.25927	3.52587
AT1G03550	AT1G03550	13.932	19.9212	15.59	17.2419	14.3391	17.3476	18.585	20.9917	14.2904	12.8358	13.2708	15.0654	17.3365	17.5565	16.8636	19.2312	8.33053	9.07306	9.82284	10.4841	24.8587	18.1961	20.4683	20.3034	7.22997	6.50874	6.2955	6.55298	5.16925	4.8084	5.7298	4.21487	12.1722	9.64911	11.2572	11.0798	20.5627	21.0544	20.9615	22.8864	11.664	10.8199	12.578	8.79265
AT1G03545	AT1G03545	1.39183	1.21558	1.49735	1.7325	1.082	1.59533	0.577354	1.26271	1.39307	1.71974	2.10009	1.68219	1.66944	1.51462	1.1269	1.20374	2.33237	1.54118	1.91156	1.4453	1.95722	2.48768	2.1352	2.43073	2.1181	1.97558	1.83008	2.00262	2.27142	1.48818	1.89867	1.8319	2.28129	1.94094	2.17409	2.05253	1.91473	1.78155	1.87754	1.73951	3.18823	3.026	2.61983	2.5123
AT1G03560	AT1G03560	6.79373	6.80463	6.41813	6.89882	7.01101	5.15931	4.8013	4.72535	7.26876	6.34839	7.2481	6.71813	6.54373	6.98235	7.24676	5.8539	9.10224	9.00872	9.70087	10.6122	9.10835	8.83401	11.3918	10.0084	7.17331	7.61923	7.7622	8.26511	5.2636	4.724	5.62067	4.80206	7.82637	8.06249	10.0481	8.70045	10.4812	10.8096	10.1171	8.77383	9.39649	8.67863	8.1973	8.25703
AT1G03570	AT1G03570	0	0	0	0	0	0	0	0	0	0	0	0	0	0	0	0	0	0	0	0	0	0	0	0	0	0	0	0	0	0	0	0	0	0	0	0	0	0	0	0	0	0	0	0
AT1G03580	AT1G03580	0.575035	0.660385	0.587791	0.693523	1.90576	2.33684	2.0167	2.04882	0.730712	1.01263	0.774435	0.516942	2.46251	2.4221	2.73451	1.87176	10.5922	17.6261	17.9081	15.2204	23.4976	27.0294	31.8249	29.5296	4.00952	4.95291	5.3297	4.65609	0.261754	0.133161	0.481357	0.92886	8.01635	8.23107	8.14794	6.95646	30.7966	28.7937	29.8499	26.6368	5.10501	4.57698	4.20994	4.38207
AT1G03590	AT1G03590	13.912	15.1094	14.1858	18.3173	29.486	24.3159	20.4855	28.1412	17.3931	15.6491	15.7371	17.1809	20.7573	22.9066	16.8085	16.6352	27.7082	28.3613	29.7072	27.5943	20.3929	23.4712	26.7415	26.4121	25.5494	23.0529	22.7495	23.2624	10.4332	9.728	11.0375	13.4969	21.2825	20.9818	20.3737	21.3381	24.2522	26.7527	25.0358	27.615	21.4903	21.1694	18.974	18.6838
AT1G03600	AT1G03600	437.353	356.349	368.297	363.222	140.544	167.037	313.522	368.454	494.699	557.559	628.334	521.205	383.478	303.523	560.365	552.759	762.255	789.925	790.054	754.803	592.183	573.103	608.46	578.689	839.197	857.433	860.473	862.888	920.64	913.454	861.348	834.601	623.885	603.678	577.579	594.107	590.387	619.955	590.296	557.675	588.696	599.349	575.844	614.902
AT1G03610	AT1G03610	19.1957	22.284	20.3846	20.4728	64.6572	46.7656	47.4015	67.857	28.4802	29.4069	34.1526	27.5054	41.5548	39.7698	43.8143	41.3382	57.272	63.0164	59.9164	56.4982	45.9144	55.0968	51.3026	54.8737	44.4713	45.3976	41.9714	42.725	23.784	27.1009	32.0295	33.3944	35.1342	35.1395	33.8877	28.3561	59.6281	61.9911	57.5771	60.3721	20.614	19.473	18.6284	19.8477
AT1G03620	AT1G03620	4.03193	2.71649	3.2971	3.76051	2.51053	3.19299	1.6421	1.7957	5.05517	4.5757	4.34404	4.27703	6.04316	5.13629	6.81085	4.96433	6.34528	6.02719	7.63745	8.14234	8.26026	7.24389	8.61507	10.5818	4.75247	4.0581	3.93718	4.16767	1.6885	1.49388	1.40629	2.34462	5.20581	4.76761	4.70485	3.91745	8.992	9.02569	8.44076	7.42123	3.87773	4.23032	3.611	4.8589
AT1G03630	AT1G03630	166.209	136.645	121.215	140.203	25.8789	29.614	48.0019	35.8777	171.5	155.861	140.078	162.92	67.2942	63.7918	67.7591	63.4121	109.257	83.5603	84.7391	95.4531	68.246	53.31	46.226	40.7962	154.172	152.388	149.892	146.238	270.944	260.199	255.041	244.678	115.443	114.477	108.432	118.868	49.2328	48.5856	44.4111	47.4295	142.219	141.336	125.331	124.986
AT1G03640	AT1G03640	0	0	0	0	0	0	0	0	0	0	0	0	0	0	0	0	0	0	0	0	0	0	0	0	0	0	0	0	0	0	0	0	0	0	0	0	0	0	0	0	0	0	0	0
AT1G03650	AT1G03650	1.98754	2.2095	2.0858	2.17974	3.68874	3.64501	2.47339	2.14215	3.03748	2.48115	1.32499	3.30191	3.04281	2.87497	2.11037	2.41341	3.4407	3.56532	3.72021	2.57193	5.16068	5.84627	5.59046	4.74335	2.83107	4.40096	3.32902	2.63655	2.14962	2.43015	2.37917	2.54271	3.5183	3.74175	3.64454	3.91522	4.80719	3.43448	3.45607	4.82894	3.36428	4.74593	3.79177	3.64211
AT1G03660	AT1G03660	2.72416	1.14711	2.55254	3.09774	3.86927	6.46793	6.538	6.19626	2.35722	3.14104	2.88262	4.04076	3.72369	3.51829	2.12684	3.48355	1.33974	3.23194	1.54619	2.51795	0.714958	2.45935	2.24923	2.6215	1.7767	2.07144	0.708511	1.47498	0.194862	0.660873	2.09034	1.84396	1.40182	2.83067	3.21125	1.4272	1.17657	1.47105	1.3717	1.75096	4.11709	3.87194	2.43423	2.27596
AT1G03670	AT1G03670	0	0	0.0319141	0	0	0	0.0423857	0	0	0	0	0	0	0.0384902	0.0265917	0.0265114	0	0	0	0	0.125147	0.039135	0.131235	0.098329	0	0	0	0	0	0	0.0261353	0	0.0350535	0	0	0	0	0.183924	0.200086	0.191556	0	0	0.0266305	0
AT1G03680	AT1G03680	232.157	219.906	217.272	220.157	116.104	147.622	204.503	200.419	223.764	219.42	245.167	212.583	199.175	196.59	262.603	251.026	361.298	393.889	382.911	382.282	313.274	306.791	275.417	279.411	363.546	388.159	396.87	383.496	406.354	426.363	420.237	407.542	317.219	339.169	334.428	322.019	322.024	330.342	338.045	327.139	363.309	371.389	382.536	380.725
AT1G03687	AT1G03687	9.42048	11.4429	10.6094	11.0958	8.65582	8.46175	7.04525	7.32211	11.4797	13.0624	10.903	10.7488	10.6673	12.3349	9.97155	10.6113	9.22142	9.92985	9.15716	12.0145	13.1466	12.6976	9.94702	10.8524	12.3649	12.3429	11.75	10.8144	10.0236	10.5754	9.52237	8.26205	12.6319	12.4409	12.2498	11.5793	10.5631	11.2013	11.1746	11.768	14.0058	14.3746	13.0669	13.2437
AT1G03700	AT1G03700	0.689552	0.912569	1.66143	1.04549	1.08823	0.903279	0.122587	0.72389	2.47848	1.37813	1.82416	3.11716	2.61016	1.66981	1.53816	1.99358	1.35648	0.572659	1.47854	1.16848	0.482597	0.113186	0.189779	0.663567	0.719565	1.46813	1.07605	0.840046	0	0.0836418	0	0	1.41934	1.60162	1.98696	0.619303	1.0211	1.38305	0.347212	0.443212	0.801645	0.58805	0.385102	0.768135
AT1G03710	AT1G03710	0.222511	0.312323	0.208493	0.196797	0.491625	0	0.184602	0	0.276467	0.159639	0.274697	0.29338	0	0.251454	0.173722	0.519593	0.145908	0	0.196457	0.159964	0.181684	0.340889	0	0.0713753	0.135447	0.315834	0.202551	0.351392	1.2627	0.629773	0.739875	0.439296	0.0763342	0.126939	0.136006	0.0777164	0	0.160208	0.348574	0.166856	0.301796	0.368973	0.463935	0
AT1G03720	AT1G03720	0	0	0	0.067587	0	0	0	0	0	0	0.14151	0	0	0	0	0	0	0	0	0	0	0	0	0	0	0	0	0	0	0	0	0	0	0	0	0	0	0	0	0	0	0	0	0
AT1G03730	AT1G03730	6.43434	6.66173	8.13083	6.9438	8.9341	5.9542	8.44797	13.8813	5.44586	6.54325	9.18228	6.65461	5.73519	5.47014	5.02352	4.91646	6.0385	4.60823	4.95127	7.63871	6.14543	6.1044	5.57253	6.07826	4.9588	4.21038	3.4928	4.08312	2.7193	2.50612	3.85018	3.98575	5.83227	6.16274	6.16992	5.19565	6.42489	7.33163	8.4614	7.76866	4.89995	4.69853	6.64626	6.04151
AT1G03740	AT1G03740	37.4805	45.2818	44.0633	41.7374	101.601	93.5062	71.0157	96.1021	31.0845	30.2403	27.7549	28.0728	36.3879	36.508	31.2582	33.3784	43.6589	46.1252	45.3966	51.1774	40.8045	47.3056	50.184	53.0308	28.1802	27.873	26.818	28.5986	15.6702	15.1419	18.2084	18.5358	33.7787	39.4475	38.6168	37.2203	60.1573	52.2799	53.919	51.8289	30.2497	31.4037	28.2895	26.5858
AT1G03743	AT1G03743	0	0	0.729296	0	0	0.892128	0	0	0	0	0	0	0	0	0	0	0	1.93916	0	0	0	0	0	0	0.710681	0.828576	0	0	0	0.660873	0	0.92198	0	1.33208	0	0	0	0	0	0	0	0	0.608556	0.758652
AT1G03746	AT1G03746	0	0	0	0	0	0	0	0	0	0	0	0	0	0	0	0.577325	0	0	0	0	0	0	0	0	0	0	0	0	0	0.629773	0.569134	0	0	0.634697	0	0	0	0	0	0	0	0	0.579918	0
AT1G03750	AT1G03750	4.3706	5.42229	5.35025	5.54891	8.25482	8.08002	6.69639	7.54018	4.66403	3.76785	4.00322	4.6008	7.54068	6.13405	7.24651	5.57852	4.6456	4.52736	4.93766	5.34653	6.38906	6.31782	6.22457	6.15056	4.35547	4.55269	4.32078	4.76468	2.89438	3.01272	2.2899	3.39583	5.00596	5.20792	5.149	4.72729	5.66304	6.14142	5.85287	5.20688	5.39251	4.97969	5.2545	5.06173
AT1G03760	AT1G03760	10.9941	12.6398	10.2587	11.1357	15.4715	13.1243	10.7863	12.9623	12.6681	13.9915	12.418	11.5935	12.1547	14.4346	11.5396	10.7235	12.788	14.0933	12.0831	13.4788	19.7229	21.8051	21.0487	21.7302	11.3714	10.8782	11.4197	10.8926	8.13173	6.04254	6.33584	6.37647	13.6153	13.5459	14.2206	13.7185	17.5749	15.7165	17.2048	16.7279	12.6593	14.3424	12.6978	11.5609
AT1G03770	AT1G03770	8.26183	7.38062	7.74134	7.58026	11.2595	11.1956	9.46468	10.4025	8.56236	8.14325	8.722	8.28442	9.66134	9.8164	7.14356	7.1821	5.62008	6.66891	7.12401	8.03492	9.1259	9.22676	9.37156	9.36227	6.97973	7.23342	7.13414	7.79173	3.82754	2.78635	3.55491	3.38417	8.6618	8.42441	8.28277	8.8591	7.70357	7.38008	7.62038	9.16279	9.55102	8.21998	7.93881	7.11219
AT1G03780	AT1G03780	9.36308	7.65408	8.46907	8.85523	6.15099	5.63789	5.18897	6.91112	11.2845	10.4793	11.0042	9.92552	9.70325	8.493	8.61616	7.46293	10.3638	8.29424	9.36898	9.23513	6.14666	6.56971	5.74823	6.05488	15.1835	15.443	14.9553	13.9819	9.57654	9.24332	10.0393	9.19826	9.53346	10.1061	9.31706	11.2496	5.30567	5.60888	5.42705	6.0663	18.795	17.5879	15.52	15.8677
AT1G03790	AT1G03790	0.320634	0.776341	0.788641	0.77985	2.03672	2.20508	3.54124	1.57081	0.186743	0.172528	0.296875	0.1189	0.766989	0.362341	0.156457	0.779921	0.0788439	0.0332851	0.0707727	0.172879	0	0.138154	0	0.154276	0.0365958	0.0853333	0.0729681	0.113929	0	0.0680619	0.0615085	0	0.164994	0.171485	0	0.167982	0.41545	0.129857	0.141269	0.0901639	0.0326162	0.199381	0.501392	0.117198
AT1G03800	AT1G03800	1.70853	1.295	1.76098	2.11553	2.45368	1.7625	0.95678	1.67404	0.716455	0.735464	1.26554	0.844758	1.00602	0.868845	1.00043	1.06391	0.504152	0.780395	0.754238	1.28968	0.837024	0.490778	0.905178	0.575451	0.702014	1.18224	1.32198	0.728495	0.085549	0.290139	0	0	0.351675	1.16963	0.469938	1.16364	0.442753	1.01487	0.501842	0.960894	1.25135	0.934931	0.601135	0.4996
AT1G03810	AT1G03810	0	0	0	0	0	0	0	0	0	0	0	0	0	0	0	0	0	0	0	0	0	0	0	0	0	0	0	0.138279	0	0	0	0	0	0	0	0.152914	0	0.157612	0	0	0	0	0	0
AT1G03820	AT1G03820	71.8417	48.9585	85.5184	66.7166	10.8519	14.5365	34.028	22.2666	42.0126	52.0683	61.7668	56.6163	43.0575	93.9444	48.3055	35.7203	16.2237	7.85361	13.139	15.257	11.8517	9.34967	8.12076	14.8851	10.9106	9.59896	7.60743	9.58564	10.4981	8.1541	6.91895	6.51282	18.3335	14.5538	16.803	19.9713	8.92868	8.709	6.97654	10.8845	21.4766	23.7773	19.9465	21.3649
AT1G03830	AT1G03830	7.51382	6.96245	6.53889	7.59238	4.00798	3.47677	3.55272	4.22497	7.48222	7.70207	7.19567	7.44981	6.56644	6.02672	4.81378	4.5832	7.41008	6.48705	6.37146	6.49915	8.93563	6.94776	7.65799	6.71556	8.70719	8.4421	7.57973	7.98367	6.17454	6.22842	5.79604	5.77716	9.01847	8.70314	8.36136	8.45472	6.50763	6.27357	6.28913	7.58199	10.1804	9.70468	9.95162	9.10168
AT1G03840	AT1G03840	5.77333	3.82491	4.32769	5.65082	5.65509	3.83811	2.73015	3.58262	6.49183	6.62726	7.34118	7.61211	6.45901	5.43691	3.42565	4.61367	1.96859	1.05482	1.80105	1.24514	1.8856	1.54784	0.889805	1.00004	2.42491	2.1716	1.40145	2.00581	1.23341	0.947736	0.886015	0.820664	4.19885	3.6559	3.38769	3.79093	1.49612	1.62116	1.04008	1.2122	2.69369	3.02522	3.46075	3.18884
AT1G03850	AT1G03850	19.3169	24.7799	34.2142	24.4375	60.7778	65.9563	52.1349	72.2736	22.7098	18.5076	18.7156	21.1169	52.5519	51.8566	30.6082	39.017	33.3503	28.7001	33.6783	30.8501	18.8671	28.6571	26.3801	31.2169	38.6249	40.0866	40.807	38.46	4.40763	4.01394	5.12846	3.86195	26.2556	30.6887	29.8166	25.023	24.7827	25.5277	22.2168	20.9029	15.3219	18.6514	17.9074	13.1085
AT1G03860	AT1G03860	54.5379	51.0651	52.0763	52.7498	62.6508	55.5239	39.8749	38.6654	58.8814	57.166	59.6858	67.11	59.2732	65.7977	51.472	47.2701	51.3657	50.238	51.657	53.0015	55.6831	57.0171	55.2208	62.4426	61.3194	61.7314	61.0892	61.0352	43.1155	48.1536	46.9984	43.7222	61.7225	67.1737	69.1116	68.634	48.1309	45.8858	47.9191	49.5972	78.0733	76.3143	75.4916	71.9076
AT1G03870	AT1G03870	65.6031	36.4226	54.4499	61.6854	42.9321	35.3981	28.4261	54.61	160.127	179.023	192.434	198.896	131.094	132.234	58.3046	115.925	219.284	182.264	182.316	174.132	193.598	219.906	216.865	207.564	229.649	215.221	213.866	201.546	99.6132	146.007	194.347	270.653	295.834	270.372	280.858	258.3	237.776	249.592	215.274	243.985	190.301	180.237	152.213	155.497
AT1G03880	AT1G03880	0	0.0325137	0	0	0.0426496	0	0	0	0	0	0	0.0381771	0	0	0.0904248	0	0	0	0	0	0	0	0	0	0	0	0	0	0	0	0	0	0	0	0	0	0	0	0	0	0	0	0	0
AT1G03890	AT1G03890	0	0	0	0	0	0	0	0	0	0	0	0	0	0	0	0	0	0	0	0	0	0	0	0	0	0	0	0	0	0	0	0	0	0	0	0	0	0	0	0	0	0	0	0
AT1G03900	AT1G03900	90.0413	99.4533	95.5128	93.2734	159.118	139.94	124.495	139.09	84.2498	82.8543	80.397	90.0801	106.208	108.414	91.8276	101.136	66.6175	68.4405	70.7632	73.8296	102.224	111.077	114.514	117.135	55.1146	55.7982	51.3056	52.0077	48.0628	45.8899	45.5094	44.8207	81.4029	76.916	88.0546	80.947	104.599	109.919	112.406	108.857	65.4807	71.8881	75.6266	64.0156
AT1G03905	AT1G03905	8.5091	8.981	9.26736	9.67602	23.1342	19.5064	18.0153	18.4071	6.17871	6.77871	6.03683	6.66596	8.78442	8.86663	4.74526	4.73093	2.98912	2.61558	3.21976	2.38333	2.57159	3.42831	4.25796	4.04105	2.37122	2.8234	2.0119	2.25125	1.05133	0.891397	1.44154	1.83265	3.41196	2.36412	3.64748	4.45797	3.1501	3.58047	3.44068	3.60474	2.42812	2.91362	4.06095	2.42356
AT1G03910	AT1G03910	36.3392	41.7455	36.8274	37.5774	56.0025	48.1644	42.6948	46.1878	43.7103	42.2084	36.391	42.0687	48.6048	48.0138	40.7999	39.2239	41.8174	40.4134	40.8807	39.8081	43.4988	46.3899	50.7619	51.7152	40.6239	41.0811	39.3256	40.1538	27.321	25.7749	27.3368	28.188	40.0829	41.8301	42.9806	41.4127	45.6627	44.3154	45.7266	43.1905	40.0927	41.1797	37.7692	40.0755
AT1G03920	AT1G03920	3.11293	2.27739	3.565	2.83663	1.91051	2.41475	1.6826	2.69578	3.22315	2.5379	3.72656	3.57579	4.35099	3.23358	3.04411	3.5489	1.14434	1.01842	1.11048	1.49193	1.77153	1.30065	1.48415	1.78527	1.3207	1.33895	1.34529	1.60887	1.35402	1.60192	1.15814	1.37814	2.20056	2.15259	2.62345	2.3063	2.98775	1.83381	1.47774	2.40506	1.97033	2.4089	2.53226	2.02282
AT1G03930	AT1G03930	23.298	20.6657	21.5523	19.1032	20.5842	22.1918	22.2482	20.4101	21.7106	23.1862	22.5203	22.0788	22.9037	19.3807	23.9159	24.4524	19.1761	16.9747	16.9512	18.61	27.9402	27.2963	27.7931	27.6098	17.4567	17.1662	16.3233	17.1954	27.517	24.201	22.4087	24.1162	21.48	19.9137	22.1271	21.4451	21.7322	22.9486	25.6939	21.717	20.3861	21.2215	20.7461	20.0543
AT1G03935	AT1G03935	14.493	13.4263	9.50599	8.33185	12.0081	8.30602	11.7233	8.87528	11.4797	15.5969	6.70955	10.0322	14.9343	6.55129	11.881	16.9216	12.117	19.2579	15.3552	16.4101	10.6504	34.1379	14.6588	20.223	6.61669	7.71433	7.91578	3.43314	7.98261	5.53766	6.67261	5.15037	12.6785	15.5027	9.96593	10.6302	24.4125	17.2178	17.8794	22.8229	12.384	7.93079	11.3317	11.3013
AT1G03940	AT1G03940	11.9431	24.1118	8.3443	11.5199	0.459715	1.14475	0.725006	0.50967	6.32088	3.17961	4.00713	6.25489	1.1639	2.16322	1.8194	0.356303	0.0818623	0.138237	0.257188	0.134623	1.57999	1.3388	0.641364	0.720819	0.189984	0.1772	0.49245	0.394301	1.12518	0.812678	1.02181	0.73941	0.0428278	0.0712202	0.0763068	0.26162	0.754872	0.359544	0.537816	1.12339	0.338649	0.248417	0.357903	0.121685
AT1G03950	AT1G03950	19.0644	18.3872	22.4619	19.4768	27.3166	28.7751	27.718	27.2795	15.303	14.6256	16.3118	17.2346	24.1739	22.5397	21.7124	21.4509	14.2959	14.6831	14.7212	17.0301	18.9571	20.6762	18.7279	22.0394	13.2136	11.0518	12.4859	11.7446	12.6648	8.01358	11.3458	11.2542	13.8575	16.5832	16.4408	15.5588	23.0987	21.8128	21.0684	21.2317	13.5176	13.8346	14.9552	12.143
AT1G03960	AT1G03960	8.25056	8.84548	8.27071	8.3859	8.0729	8.04583	7.72499	9.04637	6.22396	6.73673	8.39098	6.08668	7.98122	7.99178	7.83205	7.11523	7.21354	7.15645	7.40012	8.10618	10.6183	10.0518	9.0072	8.94785	8.01177	7.69574	7.08129	6.2541	6.53122	6.16037	6.08976	5.98808	8.05996	7.9792	8.21289	7.93147	9.79666	8.5146	9.60135	9.22146	9.50651	9.48568	9.54324	7.93985
AT1G03970	AT1G03970	24.1635	30.8487	27.5811	24.9654	36.7041	30.0883	26.2431	28.7875	24.4618	23.0489	20.9492	21.5051	27.2435	25.755	22.0381	24.2799	28.1965	25.9963	25.7464	30.676	32.6215	33.5692	32.6922	36.3063	21.9129	21.631	20.4462	20.554	21.7783	19.258	24.7782	29.9242	25.3206	24.6719	27.5417	29.7496	37.5707	36.7133	32.9065	34.901	20.9154	19.6153	18.4634	19.7521
AT1G03980	AT1G03980	0.809303	0.772455	0.985813	0.858936	0.715244	0.649341	0.436426	0.792965	0.980411	1.42254	1.19893	1.12042	0.476538	0.640201	0.442296	0.419963	0.212275	0.268844	0.357271	0.145453	0.198243	0.309965	0.25986	0.337482	0.615802	0.373338	0.270126	0.460102	0.216124	0.366492	0.248403	0.22369	0.610804	0.507866	0.27207	0.395732	0.41945	0.437025	0.412039	0.394472	0.548837	0.563643	0.442942	0.447011
AT1G03982	AT1G03982	0	0	0.091586	0	0	0	0	0	0	0.0525942	0	0	0	0	0	0	0	0	0	0	0	0	0	0	0	0	0	0	0	0	0	0	0	0	0	0	0	0	0	0	0	0	0	0
AT1G03990	AT1G03990	0.138438	0.233179	0.129717	0.24488	0.0917613	0.158679	0.103368	0	0.361216	0.268168	0.25636	0.109518	0.203789	0.531915	0.19455	0.107757	0.0272335	0	0.195565	0.119428	0	0.28632	0.106683	0.159866	0.126406	0.147375	0.025204	0.0787044	0.110909	0.0470186	0.0849827	0.0327977	0.199468	0.0947725	0.177697	0.0290114	0.621837	0.448541	0.325305	0.43601	0.0675959	0	0.12989	0.0809629
AT1G04000	AT1G04000	12.9323	16.1275	14.3896	17.9815	16.2784	15.9633	16.2483	19.4941	13.8472	13.9172	12.3194	13.7106	17.1151	12.6471	13.2519	10.7921	11.3747	9.65565	12.2963	12.4035	16.5244	13.1447	14.1941	13.0432	13.9087	14.2966	15.734	14.2567	11.581	10.2944	12.2611	12.594	10.3021	9.20436	11.1158	11.075	11.0636	12.4225	15.7786	12.5883	11.4855	14.2895	16.5282	13.6961
AT1G04010	AT1G04010	6.83269	6.44045	7.43645	8.01874	5.34182	3.40377	3.53199	2.89677	6.39165	5.99561	7.29967	6.83462	6.34437	5.702	5.31401	4.82749	4.26501	4.49588	4.82612	3.99576	5.60046	5.9787	5.54385	6.01885	4.39117	4.16844	4.42561	4.38251	4.1055	3.63714	3.93222	3.64219	5.30107	5.50962	4.74659	5.69996	6.92366	6.38596	6.32962	5.67548	4.70495	5.41232	4.74644	4.81566
AT1G04020	AT1G04020	7.02544	5.67292	6.31164	7.26081	2.64518	2.5334	2.32486	3.54493	8.11603	7.50389	11.0119	8.56047	5.50017	5.11444	3.65667	5.01786	3.88214	2.46928	2.85748	3.4049	4.15726	4.08149	3.09222	3.01319	4.30057	4.06161	4.38325	3.71484	6.27135	6.47909	7.22819	6.8883	6.01179	4.97612	6.03114	6.36879	3.04568	2.69967	2.87508	3.37404	7.32321	7.27782	7.30344	6.95041
AT1G04030	AT1G04030	8.60632	9.20389	7.36012	8.91061	7.20615	5.67608	5.48257	6.85983	8.11542	8.12247	8.2848	8.61187	9.80342	7.64169	5.99934	8.29397	7.15508	6.21141	5.84971	5.52421	6.1488	6.90642	6.34926	6.67161	7.23463	8.03486	5.31614	5.76008	4.00152	3.74077	3.48541	4.08598	6.67821	6.78019	5.91801	7.69376	6.51969	5.2007	4.77495	5.76224	8.64353	7.84917	8.03749	7.0239
AT1G04040	AT1G04040	331.593	302.137	332.709	297.785	140.473	121.684	85.0985	144.115	397.649	395.208	387.47	440.625	190.588	201.739	111.963	187.15	80.7948	67.9218	68.073	70.223	125.157	137.927	127.343	135.835	127.694	109.353	114.023	102.839	103.523	102.227	112.909	121.821	163.034	164.588	183.63	170.336	117.217	120.164	123.825	127.685	145.228	132.827	132.391	130.012
AT1G04050	AT1G04050	2.30968	2.30244	2.71625	2.43882	1.66632	1.24264	0.909209	1.38554	2.87707	2.43487	3.0114	2.4005	2.56734	2.34377	2.00565	1.81615	1.27499	1.11565	1.74791	1.75362	2.36698	1.94976	1.7708	1.54224	2.00133	1.4552	1.84504	1.78652	1.88815	1.64094	1.75421	1.42381	1.9162	1.59327	2.20405	2.79053	1.56759	1.93448	1.4399	1.56408	2.14811	1.99314	2.28499	2.02156
AT1G04070	AT1G04070	9.04901	10.217	9.78338	9.67432	9.88678	9.11828	7.67235	7.06383	9.72977	10.8084	10.1278	10.8166	8.92926	11.0127	7.84124	7.04355	5.77071	6.93694	5.26777	5.36156	7.06388	10.0546	7.75878	6.22	5.6294	7.09256	6.06481	6.21864	5.77577	5.5726	5.03603	6.47858	8.49428	6.5522	7.02017	7.81455	6.35637	5.79934	5.14064	7.49406	7.84955	11.1798	11.1182	9.01408
AT1G04080	AT1G04080	56.8144	57.3842	53.5363	56.2841	55.5536	56.1663	52.4578	50.8105	64.8776	63.5895	62.6766	63.0766	56.3749	61.3827	58.969	49.7654	50.8974	51.5977	49.0487	53.8544	63.6195	61.9566	65.8733	62.7151	52.7568	56.0079	53.5635	53.7161	46.5962	45.0708	44.9047	42.6703	53.612	52.6587	63.696	57.3547	62.4886	57.5148	61.4942	64.629	68.8296	67.8418	65.8401	63.3064
AT1G04090	AT1G04090	0.385006	0.405305	0.481001	0.539148	0.496212	0.735495	0.798534	0.943083	0.867038	0.621495	0.356477	0.920077	0.944588	0.688886	0.526029	0.474494	0.378691	0.31974	0.453234	0.484368	0.471545	0.294917	0.370865	0.277873	0.292953	0.683101	0.55491	0.516805	0.417688	0.354147	0.418524	0.266037	0.660397	0.576557	0.500072	0.571502	0.360286	0.415808	0.376956	0.541328	0.443863	0.73419	0.501711	0.687999
AT1G04100	AT1G04100	6.63629	7.24022	6.02978	7.91479	17.2173	16.9995	18.5191	15.64	5.66879	6.43839	6.61003	6.41329	6.21665	5.511	5.06343	6.02647	5.04393	5.5113	5.19341	5.58406	5.97281	5.89216	6.24726	7.16029	4.49871	4.06756	4.07309	4.0015	4.07811	2.90278	3.00906	2.56081	6.26074	5.46376	4.1485	5.63661	7.73017	4.83244	6.43847	8.19978	4.09133	3.90158	4.71704	3.28326
AT1G04110	AT1G04110	2.1394	1.80176	1.24337	2.17959	0.927428	1.1485	1.65135	1.52572	4.01251	2.62293	2.30684	2.62441	2.11285	1.6832	1.98746	1.74958	6.07321	5.60008	5.6667	6.07422	2.48761	2.83159	2.86951	2.86666	6.82474	7.40914	6.55738	8.00594	6.50878	5.38067	3.98981	4.87604	6.1874	5.95574	7.00184	5.70354	2.57322	2.54455	2.09998	3.2289	8.35254	9.37647	7.47442	8.1037
AT1G04120	AT1G04120	38.5694	43.7446	46.3211	47.5083	60.1115	59.4687	42.4798	45.4137	41.693	43.3012	47.2283	43.3549	37.8742	42.7712	29.3463	30.1228	20.4221	18.4999	18.5821	19.4442	22.8953	23.8701	23.77	24.0082	18.6342	18.7549	18.0391	19.4603	16.364	15.4609	15.324	15.0145	25.1164	25.8617	25.5948	27.219	24.8087	24.3903	26.3253	26.6925	26.4513	27.1865	26.2736	24.1447
AT1G04130	AT1G04130	11.3145	14.4951	11.6349	11.3639	8.1034	8.13295	6.32421	5.87186	10.6329	10.938	7.99023	10.193	10.5862	10.9441	6.70008	7.76206	8.25238	4.85749	5.58744	6.04882	4.87368	5.83918	4.80292	5.02883	5.4282	5.30793	5.45527	5.58753	7.87389	6.43183	6.10683	5.96307	7.35188	7.67187	8.26377	8.1883	5.50798	5.48851	4.05565	5.71626	7.0618	6.82109	7.6095	8.03768
AT1G04140	AT1G04140	42.8624	46.2418	45.3333	46.1929	52.7358	55.455	49.3295	40.359	42.3258	43.8076	44.5724	44.178	50.9987	49.2344	51.7531	49.2921	47.9246	45.3485	45.5616	51.3685	62.2904	66.0976	68.7035	68.4222	41.1416	40.3546	39.9159	39.9644	29.3084	29.707	28.6704	31.1606	49.316	49.6919	50.5079	51.7286	63.6626	62.7154	64.4166	65.2725	48.6499	49.4589	50.7892	46.1568
AT1G04150	AT1G04150	0.103726	0.13977	0.194383	0.183479	0.527107	0.14267	0.129082	0.50816	0.386636	0.42418	0.576239	0.32823	0.305382	0.25788	0.210555	0.226067	0.265265	0.120599	0.183161	0.178966	0.101633	0.0715093	0.0599498	0.0399269	0.284132	0.242929	0.226612	0.17691	0.186975	0.105688	0.143267	0.294888	0.256206	0.159771	0.247263	0.15216	0.0537597	0.0224049	0.0243738	0.0700039	0.270117	0.288962	0.421724	0.323532
AT1G04160	AT1G04160	4.6622	4.18581	3.13534	4.5816	1.50028	1.63686	1.63777	1.78333	5.38829	4.77623	5.96305	5.7179	4.28683	3.70229	2.82014	2.60457	3.31881	2.49985	2.43517	3.01952	2.24633	1.84998	1.83415	1.83233	3.23429	3.0405	3.22441	2.62666	3.50517	3.98241	3.86753	3.86421	3.77518	3.71403	3.38882	3.3741	3.02346	3.46264	2.79641	3.38585	3.70292	4.23462	3.83135	3.42531
AT1G04170	AT1G04170	72.5384	60.35	73.833	74.2939	56.4011	50.4184	39.8625	35.2269	85.2569	83.5122	86.469	87.6559	59.0064	63.934	48.9193	51.0706	49.6293	45.5244	49.0503	45.8792	67.5259	64.3587	65.4371	64.4587	56.281	57.083	49.0675	53.9728	66.7972	63.5323	64.9156	62.7265	65.1735	66.406	72.7608	67.5695	56.4632	52.7848	54.9033	57.269	75.5702	78.5379	71.2866	71.3214
AT1G04171	AT1G04171	0	0	0	0	0	0	0	0	0	0	0	0	0	0	0	0	0	0	0	0	0	0	0	0	0	0	0	0	0	0	0	0	0	0	0	0	0	0	0	0	0	0	0	0
AT1G04180	AT1G04180	4.73084	5.0327	5.0394	4.93289	2.03549	1.08451	0.80563	2.68362	5.75427	7.28841	7.19289	5.41686	3.44539	4.16442	2.48828	5.23287	2.98788	1.98511	3.42946	4.61822	3.04958	3.71922	2.92613	2.68362	5.6383	5.51337	6.43704	6.60594	0.847786	0.338267	0.267484	0.707871	6.45765	8.05404	6.9856	10.3837	5.59211	6.1312	5.61683	6.44163	4.86306	6.49054	6.50232	8.59147
AT1G04190	AT1G04190	31.7114	29.7316	30.6878	30.6801	19.9961	16.4676	13.1152	16.4386	31.929	31.126	34.9188	33.4148	23.1666	23.606	18.6332	20.6738	18.1756	14.2079	15.5639	14.4225	22.4006	22.5353	22.0337	22.2847	16.9589	17.4076	17.9396	17.4194	20.8242	19.743	19.7277	17.0186	23.9302	25.357	25.3915	24.4626	19.2279	22.8153	20.8778	20.5193	24.8835	25.203	24.6465	22.9404
AT1G04200	AT1G04200	17.0761	18.7703	18.9259	20.1795	24.5953	22.3807	18.5903	22.7085	19.874	20.7029	20.0581	19.4748	20.8238	20.8986	13.5007	14.0581	17.2449	16.2757	15.6704	17.0415	15.2666	17.6337	16.3795	18.0736	14.8683	15.1104	13.9921	13.4493	12.4106	11.8685	12.8819	13.8265	16.3879	16.0717	17.1095	15.7032	19.0864	20.1801	18.3698	19.6668	16.0854	15.986	16.6564	14.5141
AT1G04210	AT1G04210	21.3681	20.8064	20.6296	22.1442	25.3706	22.4619	19.2892	23.2846	24.6877	23.0637	23.8999	23.5234	25.099	25.363	19.5848	17.6913	22.0444	20.8983	22.5947	22.4284	23.5947	21.6081	23.4476	24.9312	24.6955	24.5492	23.4395	24.7729	19.0387	19.473	20.5715	20.5905	24.2705	22.8195	23.8547	23.815	21.9692	21.5403	22.1138	22.4875	27.017	27.0509	26.8725	24.7746
AT1G04220	AT1G04220	23.6771	25.9522	27.4504	20.6909	11.2825	14.3796	17.8989	20.6888	19.9234	20.8408	27.8777	20.1637	39.2239	41.8127	25.7694	20.7128	6.04813	3.34571	4.61776	6.02105	7.01172	6.94342	6.39971	5.64521	4.42064	4.36396	2.95954	3.41543	2.79578	2.91058	2.65745	2.8047	10.6928	11.7334	10.1413	10.1458	8.69994	8.09124	6.43562	7.83074	5.83799	7.17263	7.62606	6.68243
AT1G04230	AT1G04230	10.4005	13.0036	11.0332	11.1843	11.4391	12.1313	9.29384	12.6821	11.8694	10.9462	8.73899	11.4628	9.98201	8.75033	9.69401	9.16546	9.73424	8.6755	9.50636	8.44866	8.64185	10.0025	10.4158	10.6259	9.83126	7.56016	7.8827	8.33534	7.6166	8.6754	6.78535	8.24958	9.10074	8.90006	9.70375	9.36155	10.211	9.74814	9.42049	11.2864	7.6436	9.9376	8.81257	8.97647
AT1G04240	AT1G04240	22.3172	23.3924	17.2505	17.8449	1.00509	0.981492	3.13025	1.57314	26.0831	24.8809	27.4522	21.963	14.5748	12.8217	15.5018	17.4962	59.484	42.7571	51.4101	56.3845	74.0036	95.8063	108.931	104.909	46.8145	49.4529	47.792	49.341	35.1049	44.9876	57.1647	60.4163	76.8364	76.6648	80.3738	77.6109	118.024	122.652	106.329	88.6725	42.9432	39.403	39.2503	39.8544
AT1G04250	AT1G04250	41.8752	38.4902	41.1391	50.3218	21.5924	17.6169	12.5587	14.6332	76.6389	72.7774	61.2192	81.1551	56.947	53.8108	31.7425	42.346	28.9231	21.4824	21.6096	22.0152	21.3817	24.6572	21.5653	20.2602	38.1826	27.8461	25.2894	28.357	31.2481	26.593	26.0796	24.3896	38.0231	34.5434	40.2543	39.5625	25.3505	23.1764	22.0103	25.182	28.5554	29.1987	26.7552	28.2663
AT1G04260	AT1G04260	17.3034	17.994	18.8921	17.3	28.1746	19.7471	24.8101	27.0897	16.7555	17.0021	16.2999	17.1109	22.1493	22.3598	18.6782	19.266	16.5757	19.306	21.3883	22.7156	20.1792	20.4005	22.1031	20.5608	15.7308	16.6585	17.9428	15.2549	11.1504	11.8176	10.2179	9.00086	18.118	19.6999	18.8306	17.6578	20.5357	19.5816	20.33	19.2094	15.6732	18.7877	15.7644	17.306
AT1G04270	AT1G04270	422.617	334.282	405.548	409.647	378.233	287.509	238.172	252.51	480.234	501.001	512.073	525.246	405.087	429.258	289.834	302.005	273.314	252.76	247.01	253.184	291.531	280.854	298.277	289.309	352.393	338.729	336.349	339.094	348.411	359.78	350.251	347.041	348.462	335.331	350.583	360.653	236.886	249.558	244.646	232.438	388.891	391.06	374.998	391.128
AT1G04280	AT1G04280	28.5912	25.1822	37.1316	30.1245	43.4886	39.8663	34.5614	33.6938	29.9087	28.3722	28.9288	32.7099	35.3867	32.1622	30.1976	35.4088	36.9809	35.1406	36.4627	39.3781	32.2901	35.2599	37.1316	37.662	41.5965	42.1515	40.7241	38.5417	9.51127	10.6783	11.2836	11.5221	32.4926	34.6116	34.0509	30.919	33.241	30.5249	29.3594	31.5705	32.5156	32.6498	28.8332	26.9107
AT1G04290	AT1G04290	16.8963	18.3043	17.0872	19.157	12.992	9.47003	9.63332	12.5805	14.9821	14.4184	16.5402	17.9595	14.9015	14.4678	12.2036	12.5144	10.689	9.39589	9.52904	9.63182	12.0336	8.80898	7.60011	8.73862	12.0975	10.8556	11.5185	9.94435	13.7153	12.8297	11.1945	11.0213	9.49896	12.6115	13.9217	12.2447	8.16557	8.52112	11.6311	9.2096	12.478	12.2192	12.105	10.5925
AT1G04295	AT1G04295	1.48475	1.15424	1.28419	1.11114	0.883203	0.65455	1.13704	2.23811	1.80931	1.10619	2.11497	2.25881	1.17688	1.41974	0.891689	1.6891	0.786368	1.23305	1.71425	1.35476	0.839299	1.44353	1.21018	1.4288	1.66856	2.31011	1.14363	0.757529	0.571876	1.26069	1.05166	0.811743	1.99824	1.95468	1.36129	2.27377	1.87448	1.60353	1.74445	1.79854	2.13772	2.04539	1.78598	1.22456
AT1G04300	AT1G04300	37.6565	43.4945	38.7035	41.2815	71.3938	63.3789	60.9829	65.8498	45.1631	41.9272	40.1275	40.4509	56.8141	51.2149	50.6865	49.6543	48.5762	52.3718	49.495	52.8998	66.6164	69.384	75.878	78.6456	45.0144	46.3217	42.7573	43.2547	23.6844	23.6521	24.9749	27.1715	44.2456	44.5067	47.08	42.4067	69.3341	69.4586	66.4973	66.2228	43.4851	40.9928	37.7714	37.6361
AT1G04310	AT1G04310	3.72653	4.85808	5.04631	3.83768	24.8698	17.8754	16.4535	16.8185	3.90076	4.69707	4.11211	4.74515	10.295	11.3069	8.25004	7.23176	8.78694	10.2383	10.9748	10.817	12.6608	13.1387	16.1043	14.4918	8.55321	7.9342	8.52709	8.4647	2.68388	2.01553	2.35027	2.23739	10.5338	11.2267	11.069	9.94896	18.6967	18.5245	16.8236	18.4032	9.13941	10.0818	10.1181	9.72764
AT1G04320	AT1G04320	0	0	0	0	0	0	0	0	0	0	0	0	0	0	0	0	0	0	0	0	0	0	0	0	0	0	0	0	0	0	0	0	0	0	0	0	0	0	0	0	0	0	0	0
AT1G04330	AT1G04330	1.78251	1.10614	1.58231	1.49355	1.03641	1.07533	0.81725	1.60864	1.13652	1.00962	1.38983	1.66991	0.552415	0.21204	0.439475	0.438149	0.369111	0.389564	0.248494	0.40467	0.229808	0.323388	0.903708	0.631968	0.513975	0.299619	0.256203	0.266681	0.84556	0.398294	0.431932	0.333395	1.06209	1.12394	1.1182	1.17962	0.405198	0.9119	0.440904	0.31658	0.763472	1.30678	1.10029	1.55456
AT1G04340	AT1G04340	21.1147	23.899	25.3972	28.7405	25.3111	22.3996	16.7721	26.961	29.0258	29.008	30.3651	30.0609	25.2405	31.0535	21.6877	23.021	16.7915	14.1154	18.3119	18.1669	16.4152	18.0667	19.2574	19.5985	17.2969	15.862	15.1312	15.4662	17.7708	16.9747	16.6617	15.5215	19.496	20.7596	20.732	21.2613	18.8212	18.599	22.3447	21.2237	22.3623	19.8903	23.8855	24.0111
AT1G04350	AT1G04350	39.9487	51.9183	39.1911	44.2522	10.5628	13.1614	19.0163	11.2293	34.6637	30.6813	35.0077	34.9277	16.5816	13.1241	18.5091	20.5262	19.7541	21.7189	23.5526	20.1505	9.19741	9.48127	8.15891	7.68866	15.3879	18.6843	19.9512	16.2993	34.7593	33.9201	30.6205	29.0654	13.0307	13.8983	13.2898	12.489	8.14616	8.77041	7.74575	6.87531	11.1209	11.8587	10.8554	11.022
AT1G04360	AT1G04360	6.65029	4.44325	5.94053	6.62681	8.81606	8.1816	6.51041	10.2084	7.51925	8.87444	9.03099	9.95211	10.2465	8.56747	6.29977	7.48858	4.70967	3.12966	3.87525	5.88052	4.18115	4.33003	4.91129	5.20507	3.88626	4.57815	3.55152	3.86482	2.21994	1.84459	1.90512	1.62805	5.01916	5.95642	5.32498	6.73597	5.09352	5.1234	4.53183	3.74019	2.74206	3.48474	3.08515	3.24108
AT1G04370	AT1G04370	5.01849	6.47177	8.52296	7.49005	102.218	52.1295	58.3541	36.4946	0.58457	1.01263	2.03289	0.465247	0.46172	2.48118	0.979527	0.610356	0	0	0.138465	0.338232	0.384157	0.180196	0.151068	0	0	0	0	0	0	0.133161	0	0	0	0	0.143787	0.328652	0.270938	0.169375	0.368517	0.176403	0	0	0	0.458588
AT1G04380	AT1G04380	0.491769	0.165663	0.414709	0.304458	0.32596	0.112734	0.550783	0	0.0916525	0.158767	0.546394	0.194518	0.361957	0.555735	0.115182	0.153113	0.0483703	0.204202	0.130256	0.477271	0.481844	0.282523	0.142112	0.141971	0.359221	0.209406	0.134297	0.232982	0.0492474	0	0	0.116506	0.253058	0.126246	0.0901754	0.206112	0.127438	0.159334	0.288892	0.165945	0.120059	0.0978555	0.192251	0.0479336
AT1G04390	AT1G04390	5.91178	6.84806	5.49934	5.625	5.58778	5.87101	5.94927	5.90744	6.24484	4.86915	5.65156	5.445	5.1838	5.6919	5.91521	4.96707	5.70986	5.52996	6.35015	6.09882	6.74394	6.79268	7.79159	6.65428	4.85231	4.68031	5.16777	4.91401	4.12494	4.54848	4.17603	3.84273	6.04032	6.13641	5.32236	5.16575	6.91333	6.29254	6.14341	6.24158	5.7662	5.69072	5.7236	4.55577
AT1G04400	AT1G04400	71.4543	60.9893	83.0886	67.1527	154.264	168.929	155.079	125.236	70.6539	65.7137	65.5147	65.3358	135.739	127.872	133.529	121.452	118.753	114.479	120.595	124.273	132.06	128.476	126.308	136.802	100.727	101.413	95.0314	99.1465	75.6871	73.6332	76.3871	75.2197	111.273	108.884	117.397	107.311	136.864	136.38	143.833	139.99	94.7862	99.6838	93.1627	86.5637
AT1G04410	AT1G04410	570.164	569.984	663.018	609.181	722.844	778.086	625.427	622.298	588.047	595.577	601.903	672.415	790.287	820.281	699.844	739.364	509.499	520.751	525.758	537.051	531.143	603.186	584.662	625.046	541.477	527.872	524.974	522.615	355.752	363.605	373.157	353.927	583.65	612.455	642.409	635.439	551.632	541.313	558.085	571.134	563.01	559.541	587.863	563.989
AT1G04420	AT1G04420	53.6532	43.0985	42.1659	47.953	38.4258	37.2774	41.6087	30.673	57.0071	61.9977	58.8561	54.948	53.6993	52.8198	63.0032	53.2354	95.5393	97.8903	99.3484	104.04	68.4289	65.3948	63.5772	64.2254	109.493	116.085	114.977	111.646	143.818	129.138	136.355	130.459	90.2112	89.8534	92.1649	87.1067	63.6227	65.9285	64.0595	63.8715	104.663	104.686	100.728	95.5243
AT1G04425	AT1G04425	7.72539	8.71361	8.91911	9.5169	5.6388	4.90182	5.66531	7.09634	11.3128	12.7676	10.2185	10.095	11.1692	10.2893	8.72412	8.16088	7.73438	9.39454	8.89142	8.18195	7.43431	8.71803	7.17588	5.84121	7.55779	8.95841	8.28819	8.36574	6.90757	7.61378	6.77481	6.8634	11.9262	8.85382	8.6008	6.79381	7.50742	6.70456	6.32124	8.68967	15.2681	13.7255	14.5614	14.6568
AT1G04430	AT1G04430	69.1756	60.4743	57.5224	62.4773	49.7477	48.6931	43.4816	50.9007	78.2649	77.3053	89.9206	84.5549	64.2133	63.3973	50.1955	50.6141	91.2016	85.2497	86.5838	93.2886	87.8143	107.786	112.704	123.975	77.6535	77.9443	74.1568	72.1517	71.3395	72.6028	87.5313	98.7491	88.8387	92.438	93.9662	93.2045	123.399	136.353	123.921	123.245	81.4174	81.5376	75.4243	69.8329
AT1G04440	AT1G04440	50.7411	54.4564	61.7657	58.5922	106.025	122.565	117.311	108.966	52.6958	50.3533	49.0045	50.3245	88.1787	87.2129	80.4695	76.4051	53.884	56.5589	57.5129	58.0419	57.71	66.7291	66.4676	75.1592	48.4357	46.6552	44.609	46.6604	31.5076	30.2731	33.1009	36.8437	50.0648	51.8743	54.6461	51.3792	70.8013	66.8277	68.3741	67.6477	45.7509	44.7953	48.4739	46.1611
AT1G04445	AT1G04445	0.607367	0.716117	0.682924	0.752052	4.42841	2.22774	1.36051	2.67797	0.339591	0.915078	0.674833	0.480487	1.60935	2.33366	1.13806	1.89105	0.836368	0.201763	0.53625	0.523966	0.297555	0.558296	1.05311	0.818271	0.221831	0.905208	0.552885	0.460398	0	0.206284	0.466054	0.143893	0.250035	0.415794	0.111373	0.509125	0.31479	0.787151	0.999044	0.409907	0.0988542	0.120858	0.094977	0.355207
AT1G04450	AT1G04450	0	0	0	0	0	0	0	0	0	0	0	0	0	0	0	0	0	0	0	0	0	0	0	0	0	0	0	0	0	0	0	0	0	0	0	0	0	0	0	0	0	0	0	0
AT1G04457	AT1G04457	0	0	0	0.241382	0.301501	0	0	0	0	0	0	0.269884	0	0	0	0	0	0	0	0	0	0	0	0	0	0	0	0	0	0	0	0	0	0.467093	0.250227	0	0	0	0	0	0	0	0	0
AT1G04470	AT1G04470	0	0.0321106	0	0.033722	0.0210604	0	0	0	0	0	0	0	0	0	0	0.014839	0	0	0	0	0	0	0	0	0	0	0	0	0	0.0161871	0.0146285	0	0	0	0.0174788	0	0	0	0	0	0	0	0	0
AT1G04480	AT1G04480	167.633	161.169	165.55	184.401	205.824	153.781	117.2	229.262	216.502	232.647	228.808	236.481	178.737	205.82	149.487	145.173	138.089	129.197	122.063	133.661	164.798	160.305	160.258	156.073	168.165	174.415	161.009	169.438	174.986	177.279	168.198	178.634	188.344	166.344	188.393	193.488	131.44	126.615	133.055	135.043	207.517	202.405	197.324	199.62
AT1G04490	AT1G04490	2.15964	1.78382	1.94575	2.20392	0.963494	0.904469	0.723573	0.712127	1.54807	1.51962	1.46125	1.51956	1.10046	0.985607	0.291826	0.549562	0.204251	0.172455	0.330016	0.223928	0.356066	0.19088	0.640097	0.239798	0.265452	0.309488	0.0756119	0.35417	0.582274	0.211584	0.892319	0.737948	0.470174	0.462016	0.609248	0.696274	0.358752	0.897082	0.439162	0.280292	0.371778	0.578495	0.519558	0.688185
AT1G04500	AT1G04500	0.27309	0.197135	0.14622	0.655586	0.474081	0.536602	1.11664	0.764504	0.290838	0	0.0722439	0.192893	1.03373	1.14627	0.731009	0.425134	0.422103	0.291594	0.551116	0.462766	0.0955637	0.717217	0.33822	0.56314	0.249354	0.207657	0.10654	0.25876	0.117206	0	0.0898077	0.0462131	0.602265	0.467382	1.0373	0.940196	0.438095	0.337072	0.320856	0.263294	0.349232	0.271706	0.427044	0.304212
AT1G04501	AT1G04501	0	0	0	0	0	0	0	0	0	0	0	0	0	0	0	0	0	0	0	0	0	0	0	0	0	0	0	0	0	0	0	0	0	0	0	0	0	0	0	0	0	0	0	0
AT1G04510	AT1G04510	36.6302	36.7993	36.8572	39.1807	37.3372	32.684	29.4655	37.8864	41.1037	40.9614	42.137	40.4396	33.6368	37.3669	34.2884	32.2527	32.7427	32.6408	32.3692	32.2935	37.8477	39.4922	43.3473	43.7331	34.9866	33.8792	33.8369	33.1401	30.5318	31.5077	32.5277	31.6289	37.4696	37.8271	39.1866	39.9155	36.9197	36.3643	37.0547	36.5488	40.7904	43.0623	40.6089	38.62
AT1G04520	AT1G04520	12.8012	10.045	8.47408	12.597	3.66816	2.65413	2.06606	5.99312	15.3489	14.4344	21.2781	17.9728	8.87539	8.68965	5.28711	5.9853	6.87575	5.22485	5.8633	6.54876	8.45464	6.57623	6.902	5.50772	12.1274	9.76721	10.3802	8.2381	16.1885	15.9145	14.885	12.2656	10.9264	8.89808	10.0944	11.3532	5.09488	5.37914	6.46782	6.58522	12.9063	14.6924	12.9467	12.1794
AT1G04530	AT1G04530	40.5687	45.5941	43.4309	65.1212	41.8293	43.9346	31.9743	38.1506	61.1827	59.3155	56.7324	62.3893	41.1173	48.4278	31.637	35.5341	29.4	29.8577	27.4608	28.4107	24.6724	23.9498	23.7616	24.5907	36.9575	37.2308	34.5101	32.3868	60.0998	48.8587	48.8774	45.2391	26.1552	28.2116	29.4142	26.7265	22.2749	20.2453	20.3807	19.8265	25.9562	25.9345	26.3601	24.4531
AT1G04540	AT1G04540	0.593444	0.499786	0.261674	0.370494	0.424206	0.240074	0.347535	0.684075	0.390361	0.41324	0.258574	0.96656	0.154162	0.276144	0.0272543	0.163032	0.0686719	0.0289908	0.092463	0.0752874	0.08551	0.0802203	0.0336264	0.067186	0	0.0743241	0.0635542	0	0.209751	0.148202	0.107146	0.206756	0.143708	0.0896167	0	0.256042	0.0301543	0.113104	0.0820287	0.0392658	0.17045	0.20839	0.0545881	0.0680519
AT1G04550	AT1G04550	20.5351	22.8704	19.9158	22.3631	4.87634	7.69918	7.88142	6.34643	24.4118	25.1972	24.522	24.6716	12.1481	12.1453	8.76543	11.0918	10.5711	9.24423	10.0396	11.7964	16.16	16.3732	14.9281	15.2365	12.0475	12.1052	11.0499	11.229	19.6036	15.6844	16.5673	18.0165	16.1963	13.2204	13.6368	14.2273	12.8479	13.4726	13.36	13.2761	15.2276	14.5118	15.7933	14.404
AT1G04555	AT1G04555	9.93676	10.4607	9.31075	9.26352	12.0899	11.3896	10.8618	15.9528	7.50789	7.65893	7.08682	8.89668	7.61027	9.33245	8.43943	9.72046	6.20767	5.91042	5.03869	4.99567	8.38762	7.32875	5.75601	7.81783	4.53655	3.50226	4.03376	3.24448	4.43761	3.87656	4.12153	4.45378	5.32063	6.77957	6.15574	6.89433	6.3796	6.52606	7.57285	6.1927	6.50195	5.94522	6.03696	5.69353
AT1G04560	AT1G04560	0	0.0620994	0	0.0652155	0.0814583	0.0845174	0.642329	0	0	0	0	0	0.217089	0	0.115137	0.286975	0	0	0	0	0	0	0	0	0	0.156993	0	0	0	0	0	0	0	0	0	0	0	0	0	0	0	0.146726	0.115305	0
AT1G04570	AT1G04570	2.34585	3.81406	2.16754	2.53582	0.863837	0.597518	0.729823	0.159617	1.03229	1.40251	1.62902	1.031	1.15108	0.883662	0.686808	0.532571	0.256375	0.13529	0.258896	0.210805	0.319237	0.449234	0.188308	0.407595	0.356993	0.208108	0.296586	0.216101	1.403	0.580954	0.750022	0.42454	0.301786	0.418211	0.328593	0.443807	0.478448	0.281503	0.267961	0.293184	0.318172	0.453827	0.305693	0.38109
AT1G04580	AT1G04580	0.0921707	0.142311	0.633336	0.203799	0.322439	0.264117	0.344105	0.0752582	0.0572605	0.0661272	0.0568938	0.0759541	0.0904539	0.13888	0.0119935	0.0956582	0.0151098	0	0.0406891	0.0496963	0.0376294	0.0529524	0	0.0147829	0.0140266	0.032707	0.0139838	0.0145557	0.0153838	0.0130435	0.0707257	0.0909849	0.01581	0.0262911	0.0281688	0.0321925	0.0398089	0.0165908	0	0.0172792	0	0.015284	0.0720659	0.0299468
AT1G04590	AT1G04590	20.7655	20.0879	18.8876	19.1104	15.3967	12.008	12.397	11.5708	21.7477	19.9815	18.3607	18.9157	19.8279	16.3314	16.1758	14.234	14.6286	13.9827	13.4202	13.1127	20.4495	17.841	18.0205	17.7776	15.9286	16.5795	13.879	15.7761	15.8775	15.6462	14.1038	15.5122	19.8792	19.1704	18.5671	17.6419	15.9982	15.7594	16.375	17.2024	21.8466	19.5435	20.551	19.3743
AT1G04600	AT1G04600	0.291368	0.23516	0.466395	0.483183	0.697407	0.431375	0.347485	0.713714	0.192324	0.33969	0.359703	0.312136	0.518268	0.740852	0.473919	0.576436	0.143295	0.141152	0.128626	0.091641	0.267645	0.139493	0.245583	0.292071	0.199533	0.193861	0.16577	0.161046	0.449836	0.463871	0.409891	0.474572	0.312363	0.135055	0.122439	0.279857	0.304121	0.275344	0.0570552	0.245802	0.128436	0.326128	0.313243	0.177501
AT1G04610	AT1G04610	1.23404	0.397372	1.05427	1.12353	3.32797	2.70412	2.07771	3.55624	2.90871	3.04665	2.9573	3.19432	4.22087	4.10163	2.55032	2.88164	1.96349	1.68798	1.08954	1.68298	1.24469	1.37621	1.99284	1.15261	1.59075	1.42962	1.35461	1.58197	0.145389	0.184908	0.0835517	0.0859878	2.65214	2.7953	2.69545	2.66213	2.226	1.37196	1.74839	2.04128	1.4473	2.02223	1.78783	2.26416
AT1G04620	AT1G04620	7.09204	6.92973	5.4704	7.41609	7.18544	8.17386	10.4835	7.39037	8.47099	8.26471	8.34419	7.12936	11.7089	10.2285	14.4696	10.4916	21.0042	21.2488	21.7946	25.0136	46.4541	45.8765	44.6127	41.4389	17.7812	21.3566	21.3293	20.6795	14.9892	13.9399	13.7402	14.8061	22.7437	24.1414	23.4227	24.0998	35.9785	36.7737	43.0437	42.7511	32.7474	31.6551	34.5266	28.7967
AT1G04625	AT1G04625	1.95488	1.64636	2.13701	2.44937	1.97963	2.14733	2.12865	5.38709	2.35301	1.92845	3.9217	2.33585	1.43885	2.85349	2.09858	2.53605	0.961406	2.02936	2.37322	1.4932	1.2969	2.52694	1.72615	1.33252	0.966857	0.867115	1.70537	1.54358	1.22355	1.45238	1.43754	2.41216	2.09574	2.02136	2.16572	2.04834	1.89972	1.40752	0.957002	1.19106	1.78972	1.86393	3.12062	1.98485
AT1G04630	AT1G04630	49.4203	46.6095	44.4038	50.8944	53.4738	47.4313	44.8621	74.8311	54.8852	54.3683	53.7502	54.8118	59.296	62.7341	54.0443	52.8272	44.6144	45.8918	45.6509	52.8363	46.8475	49.978	45.7303	49.2681	53.3927	58.2862	50.9957	54.5247	44.6607	40.2379	37.6622	44.2068	58.5263	59.7425	56.0955	59.9408	47.1487	45.4228	46.8294	46.1655	59.3627	64.5777	63.1216	59.3887
AT1G04635	AT1G04635	2.77323	3.58118	2.77175	2.9433	2.8594	1.80126	1.38046	0.905747	3.87642	1.79067	2.39655	2.01107	2.31334	2.19377	1.65995	1.94276	2.27312	1.45864	1.4691	2.29273	2.26438	1.48702	2.49328	2.9356	3.03863	2.55862	1.68297	2.80289	2.49949	2.51171	1.9152	2.73755	2.18817	2.84776	3.05115	2.80896	1.99628	1.8969	2.06359	2.18357	2.33206	3.67891	4.1198	1.98229
AT1G04640	AT1G04640	19.7751	18.6381	18.0065	23.5209	13.902	14.353	17.8204	19.1329	21.3739	22.0818	22.3849	24.5204	19.5284	17.4435	20.6661	21.0863	34.9992	33.5664	32.0731	34.1594	33.255	30.2007	26.2145	31.2591	37.8108	35.6361	34.3095	31.5423	36.9996	38.5821	42.2402	35.5411	29.1563	28.0091	30.3505	28.5801	25.3283	24.1691	26.1473	23.8472	25.577	27.0761	25.4947	24.532
AT1G04645	AT1G04645	0	0	0.119581	0.112873	0	0	0	0	0	0	0	0	0	0	0	0.0993374	0	0	0	0	0	0	0	0	0	0	0	0	0.255608	0.216724	0	0.453525	0	0	0	0	0	0	0	0	0	0	0	0
AT1G04650	AT1G04650	1.91601	1.88828	1.96719	1.47826	1.03581	0.794348	0.481947	0.84879	1.48155	1.44774	1.62305	2.05593	1.14019	1.19779	1.01848	0.856749	1.10268	1.13416	1.25975	1.12099	0.973619	1.14759	0.962085	1.00036	1.48892	1.23684	1.1875	1.54508	1.65339	1.41918	1.59534	1.37626	1.65724	1.0291	1.34555	1.36688	0.968387	0.726454	0.646603	0.940017	2.13979	2.29162	1.68932	2.06624
AT1G04660	AT1G04660	0.489478	0.74201	0.183456	0.30304	0	0	0	0	0.592966	0.210704	0.725131	0.484031	0.144108	0.110629	0.343937	0.190499	0.38516	1.01625	0.518597	0.422264	3.29725	1.79972	2.31035	1.36599	0.804482	0.990046	0.44557	1.15948	1.17643	1.62088	1.87797	1.62349	1.30977	1.54978	1.75023	1.02576	1.26845	1.163	0.747621	1.10115	1.35433	0.730497	0.918504	1.3836
AT1G04670	AT1G04670	0.180903	0	0.0847532	0	0	0	0	0	0	0.0973408	0	0	0	0	0	0.0704055	0	0	0	0	0	0	0	0	0	0	0	0.0857053	0	0	0	0	0.0930904	0	0	0	0	0	0	0	0	0	0.0707218	0
AT1G04680	AT1G04680	72.585	53.1226	59.503	60.3406	29.771	28.2586	61.4429	32.3636	81.6319	82.8412	88.2729	84.7128	94.7362	135.303	93.6048	56.5497	38.0835	24.6404	29.2931	35.8483	33.6086	25.9921	25.5802	26.4697	39.9334	43.6612	38.0507	36.9976	75.6768	73.8796	86.4889	90.1757	43.3573	39.6414	39.3165	43.1462	24.6947	25.635	28.4655	31.2346	44.4486	41.1645	37.8862	39.3375
AT1G04684	AT1G04684	0	0	0	0	0	0	0	0	0	0	0	0	0	0	0	0	0	0	0	0	0	0	0	0	0	0	0	0	0	0	0	0	0	0	0	0	0	0	0	0	0	0	0	0
AT1G04690	AT1G04690	81.2676	87.1282	85.4575	86.2988	88.1537	86.2552	71.8025	65.4826	75.5644	73.2167	74.7505	75.9573	86.7061	103.62	78.754	81.7415	68.9787	69.3042	70.2963	71.8282	72.4134	68.8042	63.3901	67.1861	66.1898	66.6878	65.4604	66.7024	66.6154	66.658	63.3167	64.2304	82.4463	86.5476	86.0704	88.1409	70.3151	65.6826	66.3768	69.1599	84.3002	81.1219	87.2993	75.4347
AT1G04700	AT1G04700	1.28166	0.997409	1.0337	1.33443	1.93563	1.46905	0.827765	1.47038	2.20726	1.95543	1.77252	2.34228	3.03302	3.19009	1.79861	2.13414	1.22872	0.956607	0.959702	1.38208	0.933898	0.801563	0.968917	0.889895	1.34803	1.17442	1.12239	1.21441	0.942316	1.08825	0.908769	1.11463	1.6196	1.4716	2.02294	1.30894	1.4995	1.54189	0.991184	1.56938	1.55791	1.75941	1.09089	1.28088
AT1G04710	AT1G04710	18.5774	19.9064	17.7034	15.277	9.4318	8.06439	8.60802	8.52027	12.5602	14.4626	15.005	13.7976	11.2298	14.1597	11.6033	10.6452	12.9853	10.8654	12.1097	10.0592	12.3932	8.76533	8.90949	9.01476	15.2304	14.8957	16.1554	14.7188	15.952	14.163	13.9215	13.391	15.1735	14.612	16.3441	17.4777	8.46754	8.40968	10.0775	10.4926	15.9867	15.4945	17.5848	15.9888
AT1G04720	AT1G04720	0	0	0	0	0	0	0	0	0	0	0	0	0	0	0	0	0	0	0	0	0	0	0	0	0	0	0	0	0	0	0	0	0	0	0	0	0	0	0	0	0	0	0	0
AT1G04730	AT1G04730	4.42457	3.79899	4.36828	4.48594	3.6719	2.91919	2.55163	2.74918	5.83269	5.45838	4.95601	5.101	4.16212	4.12203	3.0163	3.12479	3.24808	2.77829	2.64879	2.97912	3.41006	3.32311	3.36807	3.55166	3.90206	3.95198	3.90979	3.08806	5.27387	5.05802	4.90223	5.06221	4.08718	4.1741	4.74926	4.74919	3.22538	3.07692	3.09373	3.18032	4.98826	5.32554	4.77574	4.20752
AT1G04750	AT1G04750	86.5087	86.2793	89.7198	88.4602	120.115	100.991	85.461	90.713	78.406	84.6169	79.7692	86.2492	84.0834	94.5473	78.643	79.8814	69.9952	65.1023	71.3048	78.5273	85.2709	91.7741	87.2126	91.9158	67.6283	71.6563	68.5545	70.1231	50.7929	49.4052	48.6947	48.2896	85.0688	86.1464	89.4742	87.3543	84.8612	91.19	96.2796	95.1073	87.3251	87.7801	91.5443	81.2606
AT1G04760	AT1G04760	6.46613	4.24439	4.36588	4.96199	1.68077	2.17986	1.65669	2.09633	6.73446	6.75395	7.74786	6.20611	5.1792	4.83565	3.34081	3.47876	5.23771	3.94852	4.70153	4.71688	2.5622	2.95	1.74035	2.7452	6.59872	5.56758	5.62641	5.67633	5.23746	5.57107	5.32651	5.51936	3.42525	4.80092	5.05662	5.28073	1.80707	1.84856	3.0165	2.13918	6.42284	8.04171	7.5092	5.46848
AT1G04770	AT1G04770	40.4718	43.0753	35.6329	42.9821	8.62518	4.62674	5.81645	3.77293	39.3972	34.4663	38.5547	40.9669	6.17662	7.92281	4.18816	7.48286	3.50018	3.21996	3.51702	3.26463	5.52933	5.24831	4.80922	7.25779	3.54023	3.44903	2.94925	2.46596	30.5836	28.5016	24.7384	19.2521	8.5273	10.1354	8.13227	8.90433	6.28545	7.05551	5.61624	7.16906	7.17496	6.28839	6.8105	5.12522
AT1G04778	AT1G04778	4.73866	3.47026	4.05403	3.6444	0.682812	0.236151	0.256392	1.00935	6.33571	2.88237	3.43371	2.44483	3.94273	2.32828	2.57366	3.68847	1.41855	1.19772	0.727618	1.11086	2.27104	2.36728	2.58	2.37918	0.564365	0.657987	1.12528	0	0.618972	1.3995	0.790464	0	1.27224	2.29196	1.51117	1.07939	1.42375	1.33507	0.726196	2.31745	1.34132	1.22991	0.644354	0.401639
AT1G04780	AT1G04780	30.1441	32.9878	35.4729	33.3258	62.2303	57.1015	46.31	49.1714	28.4424	29.3061	30.051	27.5884	38.0582	44.1389	35.0415	31.8038	31.5083	31.4587	33.8373	30.852	32.5089	35.7341	35.3326	37.1587	25.2101	25.8661	23.7166	22.833	19.8132	19.6871	20.4696	21.6721	28.4611	30.2085	30.3687	28.9532	36.5234	39.7103	37.036	39.3827	27.0818	25.8333	26.4889	23.4666
AT1G04790	AT1G04790	16.4297	16.9941	14.9555	17.2373	20.3428	19.5269	19.2795	17.2864	17.5708	18.5117	16.3863	16.4104	20.2087	18.1306	17.4975	16.6937	18.4378	18.4293	18.5705	18.0737	19.2785	19.6697	21.2698	20.9304	18.4249	18.1359	17.2143	18.2318	13.4166	11.633	12.0994	12.5066	19.434	17.6214	18.9305	19.0349	19.1689	19.8281	20.3074	18.6665	19.8536	17.1418	17.4369	17.8952
AT1G04800	AT1G04800	95.8884	85.4606	48.1781	95.3584	84.0767	89.4841	79.0197	53.2644	157.462	131.63	128.91	127.449	102.253	83.0199	91.133	93.1499	290.522	312.639	290.446	269.333	135.196	110.784	113.167	127.659	211.854	213.561	202.478	207.254	245.131	210.469	215.695	261.426	345.789	343.466	317.048	341.687	125.092	126.8	89.7734	124.927	259.906	250.526	225.863	274.358
AT1G04810	AT1G04810	29.9134	30.6126	32.2751	31.3572	34.2239	34.1997	31.0886	25.233	32.3644	33.6671	28.9133	32.066	34.5884	37.3763	28.8995	30.0424	28.3927	27.8312	27.1337	28.3971	34.2817	37.9588	38.334	37.4531	27.5916	27.0202	26.1034	27.153	19.2208	19.0939	17.1239	19.0366	29.8651	31.0563	33.3267	32.002	33.7344	35.0416	33.4006	34.5896	30.6654	31.4858	30.4899	29.3427
AT1G04820	AT1G04820	308.708	233.393	262.62	285.246	123.712	100.183	91.5396	147.901	382.336	365.009	397.472	395.621	264.739	278.162	179.312	210.122	281.069	248.167	253.114	269.543	264.7	230.12	228.011	217.774	335.656	329.544	336.148	337.198	238.342	246.342	242.109	245.485	368.159	356.262	361.817	364.313	222.567	242.688	227.74	256.589	420.926	429.538	425.866	418.501
AT1G04830	AT1G04830	15.9827	21.0142	17.5005	14.9845	17.8195	19.5887	22.3701	17.9927	17.2671	16.048	14.6958	15.6223	20.0499	18.729	18.2707	16.0032	15.9747	17.9021	17.9568	17.7524	21.7903	20.9513	24.6046	24.1539	14.2902	14.7354	12.6673	14.4095	10.2391	10.3112	9.17679	8.87595	15.3473	15.572	16.9549	14.7743	21.1075	22.2444	23.7655	21.3406	15.2294	15.7181	15.3536	14.7511
AT1G04840	AT1G04840	0.946618	0.637777	0.532189	0.865134	0.80174	0.759514	0.510474	0.69563	1.20557	0.814973	1.1102	1.06089	0.836088	0.962774	0.739058	0.687705	1.05524	0.524098	0.947214	1.36105	1.15939	1.05142	1.09422	0.971675	0.749096	0.839773	1.29255	1.16603	0.916376	1.0181	1.06535	0.710174	1.3964	1.48509	2.05404	1.28944	1.36283	1.32906	0.963899	0.709849	1.97723	1.69528	1.55429	1.90688
AT1G04850	AT1G04850	93.9459	95.1861	94.4867	92.873	116.491	108.049	90.7755	126.057	90.3461	89.4988	87.1328	93.3364	96.8177	99.7343	84.9872	86.0721	63.4693	59.78	58.6706	65.4778	76.5283	72.485	76.4423	78.1793	61.0418	56.7893	53.7045	56.5466	47.5219	43.8319	45.055	45.7198	68.8439	70.3433	71.1414	73.8701	75.3696	73.759	71.3407	73.4385	66.7328	70.7405	66.8104	60.8648
AT1G04860	AT1G04860	17.08	18.2213	18.0952	18.4015	21.864	19.6829	16.2742	19.2021	16.346	18.5397	19.2983	18.7321	18.4091	16.6545	17.5399	16.6973	19.9385	19.4387	18.9234	19.2935	24.8951	24.2028	23.5064	24.9918	15.6797	16.494	15.3464	16.3935	12.7637	12.7484	13.6722	11.9515	20.6346	19.5404	20.7669	19.5587	21.9396	21.7533	22.4296	22.8427	19.6785	18.535	17.8972	17.2595
AT1G04870	AT1G04870	28.7195	26.0685	28.3946	28.9575	31.0539	21.6508	20.9283	23.8809	34.1064	35.4096	32.6468	33.9433	27.6264	30.0681	18.2677	23.4929	19.1786	15.4171	17.7533	17.697	25.6224	24.9709	26.256	26.8163	21.1789	20.6274	19.857	19.7454	18.428	20.1085	18.6711	19.9212	22.6592	22.4904	22.0856	22.9419	18.5271	20.839	21.8589	21.7494	22.0494	25.462	23.3443	21.3811
AT1G04880	AT1G04880	0.0794515	0.200737	0.111669	0.245945	0.219429	0.273204	0.14831	0.291928	0.296153	0.29926	0.294256	0.157135	0.350872	0.224465	0.217107	0.278295	0.273519	0.362906	0.210445	0.214192	0.145965	0.273871	0.153067	0.114686	0.326457	0.422903	0.433946	0.188206	0.636523	0.371038	0.457244	0.329403	0.613271	0.237961	0.364224	0.208125	0.343154	0.171616	0.0933484	0.178737	0.355613	0.671916	0.279545	0.464657
AT1G04890	AT1G04890	0	0	0	0	0	0	0	0	0	0	0	0	0.0458753	0	0	0	0	0	0	0	0	0.0358077	0	0	0	0	0	0	0	0	0	0	0	0	0	0	0	0	0	0	0	0	0	0
AT1G04900	AT1G04900	11.9254	8.84916	8.6872	9.48615	7.22978	6.16772	3.03146	4.98736	12.0277	12.2468	12.119	13.842	8.83099	9.08028	6.50038	7.32977	6.79471	8.48467	6.22755	7.01801	9.66307	8.85643	8.3704	8.99188	8.89704	8.43772	7.6453	7.99244	6.77228	7.193	7.08628	7.32161	9.205	10.3294	10.4671	11.0479	7.60033	7.42142	7.60369	8.91536	11.5688	11.5394	10.8024	10.2064
AT1G04910	AT1G04910	25.3769	25.8639	24.1196	26.3999	24.7405	26.1253	20.0366	23.3714	23.5244	22.7462	25.705	24.8979	24.5304	25.533	21.2611	22.4863	20.4639	19.6443	19.9192	21.3992	27.5509	24.6665	24.2853	25.9828	19.1481	16.5053	17.642	17.1707	16.9533	16.3715	15.7103	14.4416	24.4125	23.2467	25.7575	23.223	24.6967	25.976	26.8574	27.352	21.0559	23.2707	22.4059	20.7635
AT1G04920	AT1G04920	0.87234	1.14792	0.902527	1.18945	0.783	1.08321	0.995117	0.845825	1.21936	0.938782	1.21155	1.02438	1.01661	1.17065	1.12092	0.976078	0.893784	0.830111	0.866471	1.25426	1.04616	0.897917	0.70025	0.996867	0.680361	0.889961	0.794088	0.947107	1.45599	1.34251	1.11563	1.27015	1.14094	1.04197	1.28302	1.19969	0.816329	0.726226	0.555166	0.879014	1.33107	1.2838	1.00888	1.08057
AT1G04930	AT1G04930	4.02413	5.45363	4.55074	5.07274	7.25594	6.46809	6.04393	5.89168	3.96547	4.1813	4.88227	5.48876	4.69816	4.8612	4.76684	3.49233	5.68697	5.26263	3.92049	4.63871	7.02474	5.63355	5.74766	6.00903	4.8147	3.98847	4.37894	4.64569	4.49311	3.96669	2.59096	2.79435	5.61725	5.42263	4.1136	6.1067	5.71356	4.79567	5.54317	6.08726	7.60358	7.04107	7.1607	5.72579
AT1G04945	AT1G04945	26.3149	24.3065	24.29	23.8803	14.5714	14.8941	14.6267	16.5546	28.2033	26.984	31.3177	26.3126	19.8011	20.5139	20.6979	18.6532	27.3926	27.548	27.3846	24.5392	25.152	23.2585	24.0589	23.4696	36.0118	36.9808	36.734	34.4004	43.3543	40.5847	41.4619	40.6469	30.2411	30.3692	33.3165	35.9544	21.8004	23.5189	22.5937	23.6869	44.2379	38.6552	41.7881	41.4658
AT1G04940	AT1G04940	34.7355	31.4464	31.7167	32.7304	17.7483	19.5578	20.6826	19.9483	40.0094	37.1427	44.0106	36.1568	28.0538	29.1743	30.0172	26.0887	40.8682	42.8797	41.9672	36.5611	33.3831	30.5542	31.3785	29.8014	58.2228	59.2119	58.5493	53.49	68.9604	65.9961	68.1011	65.3617	44.5294	47.2649	49.6755	53.6947	29.4785	32.01	30.0714	30.908	67.4453	58.7017	65.0166	63.5028
AT1G04950	AT1G04950	16.4601	16.2889	14.6747	15.2392	15.5681	17.0356	16.2237	17.9586	16.6678	15.749	15.9535	15.7409	15.7476	15.0872	16.7486	16.5648	18.1823	18.5738	18.9404	19.1649	23.9682	22.9444	27.1495	23.444	19.3794	19.3752	17.5284	17.7858	12.7413	11.5055	13.2214	13.483	17.5862	17.8203	17.2623	16.9183	22.6213	22.6756	21.1826	24.3225	18.1078	19.4136	18.1336	16.9615
AT1G04960	AT1G04960	18.9674	20.5878	23.8003	21.8779	39.2021	39.1044	36.4647	34.6679	20.6145	18.5807	17.216	19.9465	26.4548	25.4213	23.7195	23.2279	21.3914	18.9576	20.5941	22.2438	19.1132	20.6015	21.629	24.4034	16.9399	16.0828	15.7169	15.4159	15.3785	14.0258	13.9492	14.8476	17.4704	19.9957	19.2928	19.1784	22.6224	19.409	22.6263	21.5683	17.2932	17.7151	17.3937	15.1301
AT1G04970	AT1G04970	26.0787	34.5082	35.7047	35.1948	46.7576	58.4774	55.7174	54.8877	26.3074	24.977	24.6933	25.9137	38.4516	39.6761	39.2386	38.6275	31.2129	29.7533	32.9729	34.9934	37.6774	39.565	38.2911	43.6134	24.1589	25.2466	23.8546	23.6307	18.1292	16.267	16.8702	17.6454	34.6135	38.3495	36.1749	35.4614	39.4041	40.3792	38.4242	43.1464	29.1898	28.6757	32.6311	31.1779
AT1G04980	AT1G04980	16.7011	14.8319	21.3968	24.1869	40.2229	35.1559	19.8479	33.833	16.0058	12.8623	14.5841	18.5112	14.4481	22.8987	9.57852	11.4287	7.82433	7.09931	8.73552	7.85258	6.30133	6.54815	5.56589	7.35035	9.03408	6.90948	7.45738	7.72488	8.0851	6.04867	6.40767	6.65701	12.8302	11.1759	12.3733	13.3528	5.12793	6.45409	5.6728	7.65675	10.8215	12.0883	12.8106	10.994
AT1G04985	AT1G04985	40.6965	43.8448	40.0958	38.0151	62.8435	54.6516	52.462	45.2559	42.3018	40.5849	41.9722	36.1	47.1973	45.8467	45.6028	44.8721	50.0832	51.7774	54.4295	54.9764	78.5374	67.4783	69.6582	72.8272	43.3043	45.2162	40.687	43.6143	32.5531	30.8354	31.1792	32.4894	51.7504	54.3296	50.8172	52.2218	68.3886	66.8543	66.165	66.9862	50.6853	47.8178	46.2154	44.6803
AT1G04990	AT1G04990	19.7802	21.369	23.5667	23.3586	36.7467	26.1537	20.6973	26.6759	14.3249	13.7925	15.6393	14.1756	25.6824	33.9901	23.5695	22.2874	15.9217	15.7503	16.4503	17.4156	22.4569	21.3231	19.6603	22.5281	10.9584	10.5286	10.0145	11.126	11.9074	10.4734	11.8241	10.0481	22.0728	24.8826	28.4597	27.0912	24.6376	26.8034	28.1578	25.4574	21.0406	21.9649	26.6159	21.1215
AT1G05000	AT1G05000	13.7293	12.6262	16.5692	16.5626	10.6169	9.31605	6.69746	5.64987	19.2931	17.9663	21.7628	19.6587	9.2159	10.6744	6.13122	9.44691	7.2922	6.97794	6.2063	7.04718	6.65883	7.19341	7.6176	9.77679	5.06453	4.44313	2.64951	4.83929	1.2649	1.72529	2.6548	1.56126	15.6558	15.931	15.8604	16.3421	13.4723	13.1076	12.3238	18.5315	9.07228	12.0205	12.5809	9.63515
AT1G05010	AT1G05010	138.939	141.963	161.628	191.315	711.429	459.004	283.914	559.752	116.896	111.817	107.93	127.429	191.327	273.803	239.214	175.676	418.8	478.203	477.745	492.19	409.514	474.305	476.706	509.281	404.771	382.81	388.388	383.076	117.291	111.771	112.216	131.238	453.522	499.545	531.791	452.533	567.942	541.064	531.102	549.531	351.426	348.53	351.556	350.774
AT1G05020	AT1G05020	0.313396	0.175957	0.195768	0.392671	1.09635	0.658563	0.195002	0.895617	0.608422	0.421582	0.531983	0.568165	1.34557	1.00345	0.489358	0.650507	2.90274	2.08215	2.39806	1.63343	1.95118	2.55067	2.31445	2.36242	1.9554	1.69594	1.56906	2.07866	0.653844	0.376977	0.521038	0.464045	2.01587	1.98902	2.49024	2.16183	2.34619	3.24366	2.76159	3.29013	1.3177	1.40314	1.49064	1.47645
AT1G05030	AT1G05030	10.6669	13.0126	9.23119	11.9417	7.75159	9.66747	8.59973	9.80921	11.063	9.2674	9.51556	9.21655	9.59879	9.89184	9.5731	9.65454	13.6988	13.6853	12.1088	13.0313	20.7905	20.3187	20.9599	19.3022	14.0434	13.0909	14.0006	13.23	7.63016	8.00403	8.62019	9.02545	14.0418	14.435	12.8341	15.113	19.5916	20.3615	19.2779	20.6484	15.3426	17.982	15.4612	15.8204
AT1G05040	AT1G05040	0	0	0	0	0.0769578	0	0	0	0	0	0	0.0688875	0	0	0	0	0.0685201	0.115707	0	0	0.085321	0.080043	0.201312	0.0670375	0	0.0741599	0.0634137	0	0	0.05915	0	0	0	0.0596125	0.0638701	0.145987	0.0601752	0	0	0	0	0.13862	0.0544675	0.0679015
AT1G05055	AT1G05055	7.96488	6.74334	7.73951	8.60989	6.4712	6.4727	6.08348	4.74851	7.85418	8.07265	9.36466	9.58484	7.50635	6.76259	5.92234	6.59332	5.59589	5.31973	5.50674	6.2713	8.25834	8.66749	7.18521	7.54307	6.27214	6.28079	6.7517	6.26915	6.4148	6.79869	5.52966	6.48961	7.41656	7.64522	7.84351	9.00804	6.84373	6.78155	7.32797	8.15321	9.05388	8.55346	7.94093	8.46181
AT1G05060	AT1G05060	25.6336	33.6286	29.0349	25.4565	31.3098	27.6488	22.1025	34.5577	17.0203	16.6736	18.5441	19.1202	18.5426	18.79	17.2102	19.2663	16.912	14.9069	18.684	18.1337	25.2242	26.9927	27.2402	26.7889	14.4919	15.7562	14.1037	13.666	15.2004	12.7276	11.4054	11.5639	16.7882	17.3543	17.6121	18.346	22.3057	23.5351	22.1254	24.5826	17.1701	17.2949	16.3982	14.7949
AT1G05061	AT1G05061	0.723959	0.254043	0.282646	0.533582	1.06636	0.829807	0.825852	0.14778	0.224878	0.649249	0.111719	0.41761	0.976902	1.15901	0.894932	0.516554	0.593404	0.501028	0.639189	0.780684	0.591123	0.970473	1.10417	1.21918	0.605949	0.513797	0.87869	0.514478	0.181249	0.256128	0.277759	0.428787	0.99344	0.619513	0.66376	0.821786	0.729589	0.977348	0.708822	0.678602	1.08011	0.960388	0.849067	0.999679
AT1G05065	AT1G05065	6.25444	5.47805	6.32925	3.76154	1.65826	2.5808	1.868	1.83845	5.1289	5.11541	5.09606	2.96872	1.84138	1.13088	2.73451	1.75259	2.46074	2.28544	2.42972	0.80934	3.37052	2.5871	3.13286	4.09275	3.65493	2.66328	3.87151	3.55575	1.50322	0.849694	2.68758	2.66716	2.31729	3.63943	4.35812	2.88353	4.32211	3.5125	2.35149	4.78388	2.44311	3.73365	4.10776	3.41394
AT1G05070	AT1G05070	18.3311	22.8847	20.2748	20.7905	18.0272	17.7978	16.1922	15.4958	21.1685	20.5783	14.2438	19.9754	21.376	17.8722	17.9037	19.4164	24.3942	23.7608	24.3723	24.4961	31.6082	25.6055	27.9063	28.1554	20.7418	22.4991	21.5946	20.2982	19.5093	20.0206	17.2103	19.6707	21.3074	22.8838	21.5523	21.9192	25.7079	28.8813	29.3078	29.1095	21.0018	23.0303	21.0212	21.231
AT1G05080	AT1G05080	0	0	0	0	0	0	0	0	0	0	0	0	0	0	0	0	0	0	0	0	0	0	0	0	0	0	0	0	0	0	0	0	0	0	0	0	0	0	0	0	0	0	0	0
AT1G05085	AT1G05085	0	0	0	0.148691	0	0.385399	0.209216	0	0	0	0	0	0	0	0	0	0	0	0	0	0.205908	0	0	0	0	0	0	0	0	0	0	0	0	0	0	0	0	0	0	0	0	0	0	0
AT1G05090	AT1G05090	1.24841	1.35178	1.8382	1.62993	1.51049	1.63536	2.10843	2.25711	1.88352	1.91928	1.59625	1.67542	2.3628	2.41851	1.50843	1.94347	1.78343	2.19699	1.91579	1.50649	2.58477	2.15165	2.40512	2.37413	2.0084	1.772	2.02933	1.71803	1.22043	1.00954	0.843907	1.37319	1.65193	1.88225	1.55339	1.40153	1.82299	2.08664	2.20016	2.47413	2.03189	2.12929	2.62617	1.91219
AT1G05100	AT1G05100	1.4869	1.33572	1.48611	1.18357	13.9622	5.28333	3.269	3.27799	0.831358	0.480046	0.550689	1.2253	11.3089	17.9233	5.64961	4.66807	0.292503	0.329292	0.30632	0.481023	0.485632	0.398642	0.286458	0.572349	0.31679	0.105526	0.315822	0.187851	0.248173	0.841678	0.456381	0.645821	0.204038	0.169652	0.772516	0.467398	0.470947	0.695874	0.640559	0.724749	0.201672	0.493124	0.387524	0.483104
AT1G05120	AT1G05120	16.7365	18.0418	17.737	17.5588	20.0448	20.2155	17.9262	16.1724	17.4247	16.5207	17.7406	16.459	19.7437	21.131	16.9778	16.6031	14.2595	13.9952	14.3284	14.7619	16.7946	18.5938	19.0793	17.9719	12.3941	12.8282	12.3142	12.5554	8.64612	8.13447	8.05978	7.93018	17.4624	16.5147	17.4825	16.424	16.87	16.7541	18.3078	18.514	15.7993	16.6517	16.3709	15.7959
AT1G05135	AT1G05135	15.5466	11.0046	24.4424	21.0046	35.1395	21.4273	30.0886	46.0252	31.8188	37.4644	41.3292	31.1244	51.5977	47.2633	43.9342	49.5552	165.346	186.855	155.325	139.826	103.616	129.919	108.274	135.151	195.905	175.909	158.364	179.119	58.0251	70.7804	80.0297	104.168	191.413	185.435	170.915	195.778	131.162	118.563	105.225	108.892	149.88	118.761	122.114	162.226
AT1G05136	AT1G05136	0.447126	0	0	0	0	0.512499	0	1.09525	0	0	0	0	0	0	0	0	0	0	0.394771	0	0	0	0	0.430276	0	0	0	0	0	0.759301	0.343095	0.529648	0	0	0	0	1.15869	0	0	0	0	0	0	0
AT1G05140	AT1G05140	35.4705	35.5022	33.4316	33.256	18.0925	28.8283	29.9474	27.1199	32.9759	34.9799	36.1302	31.3575	26.2611	24.7871	33.4013	29.6907	33.5326	32.9966	32.7189	30.9512	34.6421	31.875	28.7749	29.2289	39.7883	39.4949	38.2596	36.5387	48.9099	48.3869	50.0435	44.0461	30.7436	28.3868	32.0997	30.8625	26.1286	24.501	25.3779	25.3768	35.6995	32.8383	34.4954	33.4742
AT1G05150	AT1G05150	20.9132	21.7774	18.9834	21.9453	18.4345	20.1755	18.1636	19.9574	25.9236	24.3347	28.9243	25.6568	23.8588	24.8891	21.9914	23.1798	26.0985	22.2709	24.1	27.5556	28.9225	29.361	30.4275	29.9362	26.8134	28.177	25.74	28.0931	18.6526	17.6278	17.3513	19.5604	27.3078	28.3355	29.2807	28.7382	29.3557	29.2682	29.4343	29.7721	32.283	32.9016	29.7394	30.0459
AT1G05160	AT1G05160	6.978	6.87322	5.74242	7.67428	7.23952	6.98976	6.83375	7.72893	9.04705	7.73803	8.03402	8.19041	8.66425	7.71424	6.72706	7.65137	8.65405	8.51626	7.55385	9.55317	14.5662	14.92	15.2846	14.4811	6.3438	6.91171	6.62823	6.38187	4.92199	5.28094	5.00526	4.27669	8.64912	8.17807	9.42975	8.86932	12.8415	13.467	14.294	13.1385	9.03645	8.75378	9.25135	8.45762
AT1G05170	AT1G05170	16.2784	23.3344	14.8715	18.1165	12.4383	10.2232	7.34338	11.5469	10.1444	11.5693	9.73408	11.8046	8.98603	11.6123	7.99614	8.36796	3.30235	2.87276	2.66487	4.31532	5.10893	3.81873	3.62611	4.63421	3.18946	2.816	2.68579	2.98844	6.99615	5.09679	4.76217	4.65999	4.64205	5.33979	5.50351	5.82769	4.18912	4.72481	5.06032	5.07346	5.49207	5.90476	6.25775	6.14839
AT1G05180	AT1G05180	27.2716	28.4989	28.0526	29.5161	37.7515	33.4371	29.9552	26.0514	25.1028	23.8593	25.0038	24.001	26.9436	29.3873	24.6236	25.4835	23.709	23.8945	23.1953	22.8293	26.3374	28.5006	28.6786	29.2276	24.2924	22.2887	22.5794	21.6391	18.5633	17.6643	16.3983	17.5347	25.3566	27.7877	28.1217	26.4445	25.775	25.3127	26.7536	25.613	26.86	26.6691	26.5103	24.4049
AT1G05190	AT1G05190	257.843	218.91	197.373	246.355	177.804	184.559	250.472	186.142	373.733	394.889	320.646	347.455	309.187	252.292	387.558	312.7	650.681	699.293	655.034	670.539	559.09	481.273	484.989	481.588	711.777	719.67	716.662	694.222	742.159	702.999	704.071	683.146	614.906	650.161	630.572	628.726	476.323	476.256	465.584	462.344	760.636	725.535	704.706	712.37
AT1G05200	AT1G05200	18.85	18.2054	17.8965	21.0393	13.7553	15.3731	12.6735	11.4375	17.8522	17.6802	17.4354	18.7923	10.8052	11.2047	14.3118	12.7281	13.1544	13.4364	12.0962	13.5099	17.4153	15.5873	12.5679	13.7203	11.8955	13.6848	12.7338	13.2364	21.7057	19.4805	17.9587	15.4778	14.6538	13.3188	15.4152	14.8587	13.4445	13.1155	13.4327	14.092	16.6691	16.7854	16.406	15.7888
AT1G05205	AT1G05205	30.8998	32.6005	33.5136	35.0372	30.6346	27.2443	24.6495	22.7347	33.5409	35.5677	27.8765	36.4881	33.3234	33.768	25.6269	29.6903	21.7093	19.8338	17.2884	21.4817	25.9233	18.0772	27.0392	21.8931	24.907	22.0502	24.831	24.8813	18.5892	18.3561	15.1122	19.5751	29.0056	31.1879	28.9531	29.8866	21.7052	20.5366	23.6711	19.4791	35.0018	31.0812	31.5936	32.1045
AT1G05210	AT1G05210	7.53262	5.65427	6.52104	6.87939	6.96468	4.22312	3.97374	4.61284	10.9869	8.72313	8.49063	9.47292	11.0885	8.79	5.49744	6.37307	6.20107	5.03175	4.12049	4.85604	3.10868	3.57491	3.54911	2.44252	7.25172	7.58309	7.22958	5.97366	5.1656	5.63115	6.28265	4.94636	7.24679	6.86627	6.23065	6.09115	4.7386	4.50976	4.13649	4.6048	8.19552	8.14615	6.46571	6.06528
AT1G05220	AT1G05220	2.99398	2.59351	3.28628	2.42103	4.81952	3.72587	3.30005	2.724	3.26828	5.06317	3.64337	4.48329	5.66656	4.54346	4.40787	4.39457	2.18762	1.34978	2.03921	2.30612	2.40971	2.26064	2.55442	2.96348	1.71836	1.82129	1.55738	0.972645	0.17133	0.2179	0.196919	0.303991	1.58468	1.90323	1.80387	2.33044	1.84731	2.12488	1.80908	2.02061	1.32266	1.70218	1.53832	1.58421
AT1G05230	AT1G05230	8.47339	8.78291	7.85534	7.97129	6.15772	7.78012	6.68484	7.54257	8.75479	7.76426	7.94956	8.13461	6.84876	6.65464	9.61613	6.613	10.1914	8.54891	9.36642	10.1553	7.84542	7.38593	7.68587	7.63499	10.2817	11.3174	11.9485	10.9038	11.0965	10.6107	10.5204	10.0639	9.36828	10.0205	10.1592	9.49082	6.34865	5.99568	6.20567	6.37088	13.4253	13.4619	11.8971	12.2244
AT1G05240	AT1G05240	0	0	0	0	0	0	0	0	0	0	0	0	0	0	0	0	0	0	0	0	0	0	0	0	0	0	0	0	0	0	0	0	0	0	0	0	0	0	0	0	0	0	0	0
AT1G05250	AT1G05250	0	0	0.0432452	0	0	0	0	0	0	0	0	0	0	0	0	0	0	0	0	0	0	0	0	0	0	0	0	0	0	0	0	0	0	0	0	0	0	0	0	0	0	0	0	0
AT1G05260	AT1G05260	126.194	114.139	154.694	115.208	61.4666	54.4508	41.5966	72.8081	116.818	134.571	159.717	141.909	132.876	137.894	66.6869	119.658	30.0052	17.7556	26.9336	26.5978	36.7237	38.706	37.4723	30.4098	26.3781	18.4302	18.0855	20.7028	1.09664	0.70843	0.920312	0.370622	54.6872	51.852	53.5951	55.4589	41.0804	35.9309	33.268	42.0557	21.6	26.823	27.6025	24.804
AT1G05270	AT1G05270	34.479	42.5219	39.382	39.7074	56.5818	51.8245	48.0585	55.0421	38.4456	38.9163	35.9672	39.538	44.6619	42.7163	40.3785	37.7782	35.7479	37.2848	33.7752	34.9733	39.4434	41.7595	44.6048	51.7831	30.2778	30.9425	28.0736	29.2649	26.3291	23.5597	24.258	25.0551	34.1273	36.589	36.5748	33.6967	43.0639	40.2833	38.6927	38.3222	31.9825	30.367	30.9771	28.2426
AT1G05280	AT1G05280	3.11644	2.05712	2.32819	2.45832	1.76792	1.54469	1.2054	1.85687	4.0422	4.98538	5.53706	4.53935	3.4097	2.76034	1.3152	1.54069	0.74562	0.489648	0.818023	0.726622	0.876863	0.677451	0.649076	0.364743	0.845981	0.537993	0.613381	0.478851	0	0	0.0323156	0	2.77393	2.34249	2.08506	3.0448	1.27325	1.22805	1.28649	1.46849	1.95351	1.67603	2.2391	1.76512
AT1G05290	AT1G05290	0	0	0	0	0	0	0	0	0	0	0	0	0	0	0	0	0	0	0	0	0	0	0.0539336	0	0	0	0	0	0	0	0	0	0	0	0	0	0	0	0	0	0	0	0	0
AT1G05291	AT1G05291	0	0	0	0	0	0	0	0	0	0	0	0	0	0	0	0	0	0	0	0	0	0	0	0	0	0	0	0	0	0	0	0	0	0	0	0	0	0	0	0	0	0	0	0
AT1G05300	AT1G05300	6.04539	5.02518	10.9245	9.99917	12.3595	12.8686	5.95992	13.366	3.95076	5.57643	5.30664	4.93	7.74344	8.07387	5.54735	6.47783	7.33626	8.6719	8.38754	8.33933	6.77919	6.40493	6.12586	5.51536	3.11841	3.21783	3.60917	3.83118	2.67322	3.63316	3.22309	2.92955	8.48421	9.06993	9.32181	8.55558	7.46008	5.55392	5.25791	6.79997	5.59055	5.54608	5.64753	6.08386
AT1G05310	AT1G05310	5.28123	4.48746	5.34617	3.67002	0.781378	2.86455	2.05382	0.693029	5.22899	3.75516	4.97721	4.66291	4.58128	5.22217	3.57103	4.58794	7.00345	5.95237	6.16162	7.42389	5.42876	4.9304	5.08726	5.53599	3.74583	5.17039	4.59287	3.44033	4.81659	3.20304	3.98011	3.85411	6.8912	6.57721	7.2199	8.20179	5.37661	4.88893	5.31855	5.56916	4.60481	5.01991	4.42421	4.6881
AT1G05320	AT1G05320	17.4203	19.3218	16.3894	16.8955	11.9656	15.2946	15.4847	18.2297	18.3315	17.0892	15.2736	18.0233	16.6073	15.7757	13.7301	13.8178	13.9641	11.3966	11.6975	13.9036	11.7565	10.8114	10.1596	11.3355	13.7204	12.7417	11.6073	11.9249	14.4784	13.765	13.7491	13.4762	16.4162	16.9149	18.4924	16.8128	11.2602	10.7764	10.526	11.0903	15.7002	15.6813	14.7323	13.5839
AT1G05330	AT1G05330	0	0.384746	0	0.269368	0.336458	0.174547	0	0.373019	0	0	0.563991	0	0	0	0.118892	0	0.149784	0.379401	0.134451	0	0.373022	0.52492	0.293378	0.293087	0	0.486338	0.277244	0.721457	0	0.258603	0.116851	0.541162	0.626899	0.260624	0.139619	0	0.657712	0.493395	0.357835	0.342579	0.247852	0.454532	0.238131	0.296864
AT1G05340	AT1G05340	8.95572	13.8898	13.5427	8.31292	57.5003	51.9354	62.0144	60.8163	7.84976	8.49274	7.06059	8.59301	43.727	46.3946	32.9526	27.1936	14.129	12.8868	15.5793	17.3069	11.0773	11.8184	14.6058	15.9565	8.2583	9.0619	6.78018	7.14151	2.21994	2.18339	2.58552	2.31079	10.3121	9.25712	11.7068	10.4059	17.9997	18.291	17.6064	18.0526	4.90684	5.11684	6.58628	4.40787
AT1G05350	AT1G05350	20.4208	18.8949	21.8211	21.8993	29.1943	25.4939	18.3241	23.8242	21.4126	21.6008	19.7327	23.1823	21.5615	25.9233	19.6038	18.5493	18.8662	17.2165	16.2164	19.1376	19.3157	19.9018	19.8947	21.0309	16.8768	14.7265	16.1904	15.5675	14.0085	13.7199	15.1344	13.7243	20.9368	20.89	24.5136	23.4272	21.355	20.6735	22.2626	20.7904	20.087	23.016	21.4199	22.0196
AT1G05360	AT1G05360	8.642	10.1958	9.13205	11.0778	7.23385	7.63642	8.14881	6.62109	10.3237	8.93149	12.4078	11.0305	9.91945	11.9172	9.21412	7.37868	6.55306	6.73437	4.90746	7.14331	7.7402	5.73037	8.61797	6.96081	7.75183	6.64662	6.3766	6.20453	8.54002	7.43482	7.44927	6.44885	7.79706	8.27483	8.72621	7.85846	8.25429	8.30549	8.90116	9.97763	8.365	8.977	9.13827	7.34738
AT1G05370	AT1G05370	3.19483	3.37225	3.55236	3.61682	1.08235	0.83004	0.848173	2.39992	3.85046	3.2548	3.70748	3.45415	1.9439	1.29974	1.19727	1.6247	1.59217	1.34431	1.39157	0.689033	1.77387	1.5173	1.18996	1.6397	1.01128	0.906955	1.31841	1.2916	2.1756	2.2425	2.02658	2.47253	2.19203	2.04132	1.87467	2.00855	1.50865	1.5642	1.7517	1.72493	2.46127	2.24625	2.29812	2.07604
AT1G05380	AT1G05380	17.0676	17.6168	17.1091	16.6764	23.5982	23.311	19.2052	19.6125	17.172	17.8249	18.6466	16.3791	21.6832	19.9611	18.5743	17.5548	22.1231	22.5495	22.3676	24.5839	24.8901	28.0205	27.4061	30.2757	19.7837	19.0478	19.7372	19.9219	11.4916	12.1047	11.5958	12.1451	21.6385	22.2021	23.2414	21.598	26.6617	24.0934	26.0491	27.9978	22.0715	23.0317	20.2023	19.4361
AT1G05385	AT1G05385	18.5078	17.4373	16.6291	19.5083	5.78834	6.00572	7.67733	10.1435	23.862	23.1006	21.127	21.0596	10.8232	8.40427	11.5465	13.3536	20.2823	18.1075	15.5945	16.8594	28.5677	25.6352	26.4571	27.3254	20.3716	19.0728	18.6169	16.9761	37.8303	31.2861	34.4341	30.1324	22.7877	20.3937	23.4774	22.3148	24.2363	20.4448	25.4188	19.9624	20.7009	19.3389	18.8318	18.2046
AT1G05390	AT1G05390	0	0	0	0	0	0	0	0	0	0	0	0	0	0	0	0	0	0	0	0	0	0	0	0	0	0	0	0	0	0	0	0	0	0	0	0	0	0	0	0	0	0	0	0
AT1G05400	AT1G05400	1.22354	1.35585	1.87054	1.70866	2.27651	1.62387	1.52264	1.41968	1.32021	1.03953	1.78876	1.20993	0.758372	1.60102	0.754156	1.55388	0.506727	0.962649	1.47828	1.04164	1.49856	1.18388	1.79892	1.61123	1.0584	1.16542	0.820686	0.61018	0.515915	0.328074	0.148242	0.381412	1.52434	0.826598	1.00372	1.34952	1.16816	2.08647	2.19416	2.6801	1.41496	0.896992	0.805607	0.878766
AT1G05410	AT1G05410	11.8302	12.774	12.9613	12.759	16.0188	16.8329	16.1065	12.1727	15.2057	14.6469	14.4903	12.9087	17.7423	14.2491	17.2853	14.4909	15.065	15.3376	15.5856	15.8764	19.7581	19.4307	24.0416	23.5895	11.9871	14.173	12.4569	13.388	10.1016	9.4466	10.2444	9.09343	14.9615	14.2807	16.5587	15.1936	18.7722	16.5415	19.1716	18.8131	13.3394	14.021	13.2221	12.4709
AT1G05420	AT1G05420	1.94411	1.71526	1.5614	2.70199	0.613629	0.848897	0.806449	1.36062	3.19196	3.5866	3.6001	2.28866	2.45301	1.6739	1.22872	1.94561	1.91222	2.22961	2.86079	3.49407	4.53542	3.93574	3.74541	3.02899	1.9442	2.06962	2.35962	2.28069	2.68857	2.35818	2.06008	1.53528	4.6686	4.19869	4.24394	4.75314	2.39906	2.19963	1.95785	2.6033	3.23954	3.68431	3.11248	3.51921
AT1G05430	AT1G05430	22.5708	25.7762	25.4119	24.4567	22.1277	25.7354	23.5294	30.9728	24.2265	26.2611	23.3055	24.1309	25.8325	26.3748	27.3093	23.5475	26.0364	25.1728	25.5621	28.8632	27.9336	33.0626	25.2706	28.0317	26.3818	24.7827	26.7853	25.3615	25.5026	22.3254	19.9037	22.6771	28.0941	32.7639	30.4451	29.903	27.459	25.0147	25.408	26.7838	27.4558	28.6879	32.1999	27.2411
AT1G05440	AT1G05440	1.73404	1.4256	1.70217	2.04487	0.456102	0.709846	0.667929	1.31473	2.11605	2.8436	2.90527	2.36798	1.8233	2.33285	1.35383	1.60683	1.58377	1.23436	1.38519	1.55826	1.01134	1.42316	0.874946	0.874078	2.78967	3.42825	2.70598	2.54282	2.27402	2.06831	2.31269	2.10298	2.25203	1.80184	2.19551	2.72542	1.24823	1.20392	0.824639	0.928801	4.50223	5.54547	3.93828	2.73651
AT1G05450	AT1G05450	2.03214	2.2004	1.99479	1.62613	2.56565	2.88384	1.92678	3.55556	2.16421	1.45795	2.50874	1.1483	1.42449	1.31227	1.58656	2.48564	0.951814	0.321457	0.256313	0.208702	0.237039	0.778315	0.745715	0.372488	0.44179	0.309047	0.0880881	0.0916909	0	0	0.0742539	0.114628	0.298775	0.910886	0.798498	1.11535	1.17025	0.731573	0.341083	0.76193	0	0.57767	1.05925	0.0943221
AT1G05460	AT1G05460	7.28517	7.53555	6.7562	7.10414	6.19083	5.18148	4.83521	6.31447	8.2336	7.4983	8.33654	7.55507	7.17698	7.15619	6.3149	6.2813	6.98195	6.71726	6.39915	6.94953	8.23632	7.27609	7.80932	8.233	8.5964	9.34634	8.02602	7.91178	6.697	6.5823	5.87684	6.594	7.67074	7.449	7.62135	7.73135	6.87388	5.7497	6.14523	6.05132	9.94183	8.41914	7.88689	8.12061
AT1G05470	AT1G05470	6.31383	5.90819	6.72678	7.28014	4.15918	5.14628	4.94715	4.81161	8.56397	8.50598	8.48748	8.41725	6.747	5.68165	6.55431	6.3343	6.7623	6.7583	6.3178	6.73289	8.10534	7.06655	7.70378	8.7988	8.81841	9.06148	7.98258	8.19827	8.29	7.30686	6.24443	5.56779	6.83497	6.58357	6.45346	7.08125	6.42353	5.834	7.25334	7.31234	8.202	8.1664	9.14189	8.50191
AT1G05490	AT1G05490	0.589331	0.277017	0.346733	0.290918	0.272531	0.251347	0.187612	0.167859	0.421462	0.38348	0.482212	0.420139	0.423678	0.309762	0.171204	0.213359	0.134806	0.261787	0.145207	0.162572	0.318934	0.488175	0.369656	0.303345	0.312854	0.248032	0.237043	0.181807	0.494101	0.616767	0.630997	0.649395	0.423157	0.387027	0.490064	0.430819	0.343326	0.458858	0.547488	0.43165	0.46844	0.477258	0.439351	0.333972
AT1G05500	AT1G05500	35.0481	32.3351	33.372	34.9619	32.3808	30.3776	23.983	28.2512	33.4954	31.7367	35.9091	36.3422	32.0202	33.9006	27.34	28.1877	27.2142	25.8561	25.932	26.9038	28.3245	27.98	29.5299	29.8457	29.8193	28.7225	27.09	26.839	26.9297	24.4567	22.0101	23.0058	30.8737	30.7588	33.0926	31.245	26.7389	25.8478	28.0139	28.3992	33.1418	31.5708	28.361	29.0071
AT1G05510	AT1G05510	0	0	0	0	0.0710682	0.0737371	0.0800571	0	0	0	0	0	0.189399	0.218098	0	0	0	0	0	0	0	0	0	0	0	0	0	0	0	0	0	0	0	0	0	0	0	0	0	0	0	0	0.0502991	0
AT1G05520	AT1G05520	33.4239	32.8507	32.0493	33.4426	33.7192	33.3368	26.6981	33.0836	34.8043	33.3723	38.0125	32.835	32.2272	32.4268	26.0953	26.2062	20.7901	21.1576	21.0081	22.1883	30.5757	31.9616	31.3509	32.6102	19.9675	19.0236	17.8426	19.7505	15.3077	14.7799	14.7786	14.526	29.2806	28.7062	31.5835	30.5261	30.1565	29.4629	29.245	30.7129	29.0254	29.4222	30.5747	27.6125
AT1G05530	AT1G05530	1.42865	0.776242	0.86364	1.71191	0.407291	0.369763	0	0.112887	3.86508	4.61237	4.69374	3.73694	4.13827	3.28103	2.15883	2.15231	0.997248	0.65064	0.325513	0.894534	0.564441	0.529524	0.66589	0.443487	0.294559	0.490604	0.0419513	0.349337	0	0.156523	0	0.0545909	1.56519	1.65634	1.3521	1.44866	1.15446	0.995447	0.974631	1.29594	1.35014	0.962889	1.04496	1.12301
AT1G05540	AT1G05540	3.52455	2.88469	1.25588	2.94163	0.38388	0.910392	0.67954	0.607992	3.93204	4.38064	4.13667	3.19079	1.89996	1.68296	1.47276	1.08192	1.0742	0.535942	0.788921	1.07062	1.76319	0.798539	1.00418	0.907646	1.22383	1.374	1.03934	0.799624	5.51811	4.97372	4.87573	4.11624	1.22616	0.722156	1.0013	0.676194	0.471689	1.07226	0.349946	0.725891	2.34308	1.62987	1.51372	1.54837
AT1G05550	AT1G05550	0.229087	0.154346	0.257586	0.364705	0	0	0	0	0.426957	0.246535	0.254534	0.226538	0.269784	0	0.178856	0.178316	0	0.114151	0.16181	0.0494074	0.0561159	0.210578	0.353077	0.264545	0.0836703	0	0.0834148	0.0434132	0.137649	0.272322	0.175786	0.379915	0.0471541	0.117622	0.126023	0.0960159	0.118732	0.346381	0.0538314	0.206145	0.111858	0.0455853	0.0358235	0.133977
AT1G05560	AT1G05560	20.4036	12.9359	29.0711	36.0915	50.8211	66.6565	41.1299	54.4716	15.2392	19.1204	20.5898	16.7004	52.3649	74.0519	36.4237	33.3694	33.7489	28.6855	35.6579	34.3219	23.2582	24.0146	18.366	24.8191	30.4572	32.7032	27.9295	34.1404	14.9994	14.5993	12.1381	10.9531	65.8671	66.7663	61.4457	69.9424	30.2328	33.7141	36.1381	39.368	72.7292	71.4309	66.5606	80.8916
AT1G05562	AT1G05562	10.8664	11.7897	10.9615	10.0869	5.08292	5.89095	8.46691	7.79343	11.9962	11.9574	11.9647	10.8423	10.1596	6.96965	10.6621	10.4394	10.4475	9.95929	11.3227	11.5067	20.4429	16.31	14.5222	13.5657	10.1901	10.3173	9.31241	8.7657	15.8328	12.219	12.5073	12.0022	10.5789	9.38248	7.76383	9.59086	10.3167	10.6256	12.3645	10.2407	10.4363	11.0062	11.0603	8.39701
AT1G05570	AT1G05570	18.7295	19.0608	27.1908	26.027	16.1192	23.5877	17.1026	18.0711	28.5082	29.1069	29.5933	28.2818	34.9262	29.5143	21.0207	33.1499	26.1309	24.0742	24.3761	26.4997	33.1013	39.2133	41.5655	44.7593	25.2559	24.4637	22.0535	22.7135	8.98422	9.40475	9.90266	9.68303	25.6276	26.3713	27.9269	26.1452	34.3345	31.5944	30.4571	32.9169	21.4202	22.7011	21.5707	19.9292
AT1G05575	AT1G05575	3.17126	4.59373	4.39779	3.59013	24.2433	17.3023	11.5237	22.3721	1.41849	3.4128	6.10744	2.50878	6.90908	8.74439	4.95184	5.33184	4.9908	5.05665	7.16784	9.71208	6.83598	6.4131	5.49862	7.93457	3.93806	4.86143	4.27245	5.28855	3.42988	3.44665	3.11478	4.35761	3.26378	3.2565	4.18689	8.77242	6.68405	4.79497	5.36537	3.5671	1.0323	2.77658	4.06643	4.8221
AT1G05577	AT1G05577	0.251843	0.353495	0.471954	0.22274	0.0463694	0.192443	0.0522343	0.308449	0.469368	0.451708	0.854998	0.373561	0.247152	0.569203	0.0655409	0.163358	0.0412854	0.209151	0.185295	0.0905254	0.154225	0.28937	0.283026	0.121176	0.306605	0.312785	0.382087	0.119314	0	0	0	0	0.0863969	0.359183	0.230902	0.175923	0.108772	0.0453319	0.0986311	0.283278	0.17079	0.208806	0.262546	0.286389
AT1G05580	AT1G05580	0	0	0	0	0	0	0	0	0	0	0	0	0.0324496	0	0	0	0	0	0	0	0	0	0	0	0	0	0	0	0	0	0	0	0	0	0	0	0	0	0	0	0	0	0	0
AT1G05590	AT1G05590	9.94042	9.06925	8.14991	9.26269	4.3468	4.20485	3.7921	4.85537	9.48369	9.74239	11.3404	10.7075	7.14225	7.32178	6.16709	6.01031	8.03142	7.41996	7.26149	7.84805	8.91366	8.66819	7.75145	7.62988	10.238	10.7081	10.0182	10.8485	9.09549	8.2896	9.17131	9.32191	10.9307	10.405	11.2296	10.4467	7.97329	7.7642	8.23794	7.65378	11.5082	11.4207	11.4501	11.5923
AT1G05600	AT1G05600	3.78195	4.60754	3.68131	4.44905	3.20448	2.94605	3.19855	3.41778	3.38741	4.70223	5.30355	4.79283	3.83763	3.23654	4.21405	4.00126	6.21191	5.54982	6.0947	7.72102	7.46521	6.32838	8.02884	6.50151	6.26948	7.0359	6.11664	5.91452	4.81695	4.583	4.56434	4.39296	5.9329	5.59288	6.02599	6.00186	6.15315	5.98799	5.91023	7.43419	7.23115	7.30639	6.57432	5.47582
AT1G05610	AT1G05610	0.516407	0.434907	0.161291	0.41867	0.380324	1.08517	0.696196	0.316239	0.922344	0.879921	0.717212	0.595771	1.07693	0.826737	0.739159	0.435457	0.931219	0.60756	0.417946	0.881711	1.10684	1.28561	0.663254	0.455535	0.589405	0.549745	0.587605	0.774741	0.861913	0.657715	0.330214	0.866598	0.8415	0.589207	0.7102	0.586189	0.892154	0.697152	0.606733	0.774487	0.385228	0.685055	0.70659	0.671135
AT1G05615	AT1G05615	0	0	0	0	0	0	0	0	0	0	0	0	0	0.137274	0	0	0	0	0	0	0	0	0	0	0	0	0	0	0	0	0	0	0	0	0	0	0	0	0	0	0	0	0	0
AT1G05620	AT1G05620	28.4227	23.6273	26.3367	28.019	32.2117	32.3374	30.7286	33.8459	31.1371	30.7571	36.775	36.7825	36.5809	40.3723	27.81	27.2762	19.0683	14.9219	15.8639	15.8631	15.8292	17.325	16.6499	17.7962	19.0925	17.338	17.0734	16.6267	11.7852	10.3047	10.159	10.5797	26.8187	23.1982	23.2655	25.3226	17.8352	18.4406	17.3452	19.915	23.8142	23.6788	21.6479	19.8179
AT1G05630	AT1G05630	9.45336	10.4414	6.78837	8.5681	3.29011	3.04929	2.99832	3.36074	8.34152	7.40046	7.18819	8.80216	4.77821	5.55895	4.72879	5.40476	7.43865	6.94764	6.55899	7.41551	7.3158	6.57487	7.33328	7.79293	7.95952	8.99493	7.09752	7.46708	9.34963	9.14909	9.83448	10.8215	6.81902	6.90115	7.79289	7.50351	7.51552	8.45686	7.33249	8.48784	7.72031	7.72414	7.1297	6.70284
AT1G05640	AT1G05640	2.34243	2.70548	2.63383	2.60447	1.62657	1.53423	1.49916	1.39348	2.68176	2.37679	2.04492	2.77963	2.01966	1.81517	1.72431	2.03167	1.18492	1.30616	1.56588	2.09294	2.50008	2.07627	1.90182	2.41517	1.92495	1.95929	1.94953	1.90244	1.77609	1.81845	2.13123	1.78377	2.37633	2.2622	1.87152	1.92847	2.16794	2.34913	1.96582	1.91964	3.29509	2.92985	3.16585	1.92442
AT1G05650	AT1G05650	2.02169	2.59874	3.09074	2.16449	1.23425	1.21962	0.463453	1.17289	0.793239	0.916071	0.39408	0.789154	0.548219	1.50306	0.456906	1.49081	0	0	0	0.0573709	0	0.24452	0.102497	0.20479	0.0971564	0	0	0	0	0	0	0	0.0547545	0.0910536	0.243892	0.111492	0.0919132	0	0	0.059843	0	0.0529328	0.16639	0
AT1G05660	AT1G05660	3.72416	2.06107	3.68894	4.47015	2.29217	1.34158	1.25794	1.69417	4.90817	6.64152	6.50232	6.6815	7.44012	7.15459	2.65836	5.3835	1.09892	0.574385	0.469728	0.803193	0.521286	1.16147	1.07621	1.02395	0.582939	0.339821	0.435869	0.705749	0	0	0	0	3.39478	3.0503	4.9754	3.4005	2.20592	1.78122	1.93775	2.69293	1.21228	1.37625	1.16473	1.815
AT1G05670	AT1G05670	3.5751	3.69075	3.47594	3.45095	4.33169	2.95218	2.87034	2.87202	3.54645	3.7026	3.59493	3.80141	3.25386	3.69259	2.95628	3.05208	2.3065	2.44228	2.59646	3.00542	3.31932	3.31275	3.79557	4.12475	3.19417	2.9465	2.6945	3.26002	3.31075	3.21511	2.46307	2.34515	2.67053	3.12511	3.27782	3.36337	3.78554	3.59126	4.223	3.24302	4.30151	4.58966	3.98252	3.70953
AT1G05675	AT1G05675	0.168908	0.462314	0.989165	1.45654	27.5695	9.34135	6.56865	18.4116	0.118049	0.0454431	0.0781957	0.0835139	2.61074	3.81756	1.18685	0.986055	1.99365	1.47288	2.23695	6.83033	0.362028	1.0189	1.0169	2.19432	0.462681	0.359623	0.269073	0.600167	1.60692	1.50589	2.04134	1.90077	1.08647	0.650427	1.12275	1.46011	1.56847	1.00331	1.43877	0.99745	0.584186	1.26039	1.05652	1.85217
AT1G05680	AT1G05680	3.61324	1.99368	7.31602	5.50981	12.2501	5.76004	4.34144	8.54553	1.04495	1.38554	3.30704	0.944593	8.49802	10.8417	3.33978	2.74781	12.4185	7.93294	16.8308	6.09084	6.40919	6.15588	7.88119	7.95331	5.2332	4.95181	3.59156	4.4468	0.332728	0.141056	0.318685	0.344376	7.35182	10.9462	8.79602	13.4468	6.13466	3.90231	3.61089	3.36351	12.8432	12.6856	13.3461	12.9945
AT1G05690	AT1G05690	2.81043	3.71025	2.70455	3.45976	1.55237	2.26364	2.55218	1.95363	2.65433	2.04357	2.03954	2.85426	3.80168	3.00432	2.69827	1.95108	1.97986	1.3247	2.01191	1.43341	1.95364	1.92007	1.82919	2.3025	1.14437	0.929902	1.00259	1.11556	2.51019	2.35406	1.9234	1.8895	1.32895	1.07249	1.70622	0.915275	1.67313	2.13289	1.651	1.36702	1.3599	1.05802	1.1284	1.22161
AT1G05700	AT1G05700	10.2488	13.8391	16.0437	13.9671	11.2132	10.7589	7.17417	13.3972	10.0096	12.1429	11.1773	11.9863	5.40369	6.04151	1.59647	3.02989	2.15668	1.35037	1.52262	1.77998	1.96132	2.23629	1.92226	2.03889	2.29451	2.20306	2.04081	1.42397	0.0493436	0.0209186	0.0189044	0	2.10448	2.74068	2.59761	2.89121	1.48968	1.86252	0.984152	1.85668	2.28558	2.74531	2.88939	2.35333
AT1G05710	AT1G05710	19.5909	16.8074	21.0444	21.3753	12.8776	10.9828	8.96206	7.62432	14.9006	15.3689	16.6134	16.4156	13.1168	11.173	8.1956	9.73852	7.62378	6.08217	7.05888	8.62147	7.84862	8.97597	7.99532	7.8112	5.07109	5.71742	4.83338	6.76591	5.19505	5.95937	5.33873	6.57881	11.3688	10.0796	8.16956	10.2318	10.3856	9.16196	7.95933	9.6108	9.4366	9.2904	11.7864	9.51804
AT1G05720	AT1G05720	32.651	30.3497	31.8782	35.1526	32.5969	33.359	29.4962	31.3994	29.9005	33.3159	34.0385	35.7158	30.2627	37.2626	29.646	34.012	25.3752	26.0448	25.9807	29.9063	34.5594	38.0721	38.6741	35.7652	24.3658	22.2285	23.3374	23.4516	15.9049	15.7443	17.0122	15.4709	29.3721	30.4931	29.4186	33.114	33.4969	36.3952	37.6043	36.6358	30.6388	30.2397	32.3368	27.425
AT1G05730	AT1G05730	1.87044	1.48258	2.31962	1.36236	2.06631	1.13501	0.821528	1.61707	2.05059	1.9537	2.03745	2.39363	0.728841	1.1812	0.987861	0.984879	0.541106	0.411184	0.485713	0.771204	0.673783	1.13778	1.05985	0.741157	0.653008	0.702771	0.75117	0.938271	0.881468	0.653953	0.802052	0.977492	1.01912	0.941523	0.907891	1.84458	0.950412	0.594141	0.646352	1.05195	1.20876	1.09468	1.03232	2.14488
AT1G05740	AT1G05740	0	0.242443	0.13487	0.127304	0.159011	0.164983	0	0.35258	0.134131	0	0	0	0	0.325321	0	0	0.283154	0	0	0	0	0	0.138651	0.138514	0	0.15323	0	0	0.144144	0	0	0	0.148137	0.123172	0	0.15082	0.124335	0.621813	0.338228	0	0	0.716043	0	0.140299
AT1G05750	AT1G05750	1.62204	1.41543	1.40999	1.84942	1.83508	1.3888	1.60511	1.43611	1.42047	1.45115	1.26662	1.33344	1.84116	1.8772	1.89195	2.02314	2.28744	2.72661	2.82972	2.21276	2.34567	2.64966	3.29436	2.99019	2.01639	2.55893	2.86413	2.49983	1.97664	2.00782	1.72452	1.43527	2.45377	2.52521	2.83099	2.21152	2.90356	3.25035	3.14565	3.25334	2.60821	2.64434	3.07127	3.14302
AT1G05760	AT1G05760	6.36414	8.29085	7.64035	7.38766	12.1937	15.0452	11.261	18.5121	10.6564	7.06289	8.65468	10.7183	12.5888	13.822	10.7914	10.217	6.06414	7.01952	6.8481	8.14957	9.62149	9.36907	10.7282	10.3348	8.5349	6.66912	7.60364	5.84175	8.26533	6.41693	9.30903	8.48105	8.90365	8.84972	9.29944	6.98099	10.0499	9.77296	9.81395	10.1785	7.93047	8.60742	9.79642	9.20793
AT1G05770	AT1G05770	1.35036	1.13724	1.34436	1.11966	3.91589	4.15968	3.78101	3.101	2.04482	1.99816	2.81316	2.16991	3.10595	2.38438	2.30622	1.44525	1.49423	1.12144	1.4903	2.36626	3.41113	2.71525	2.35763	2.27407	1.15593	1.70707	1.30605	1.75931	2.7891	1.50488	1.4895	1.59958	2.60578	1.94997	1.47021	1.23805	2.4787	2.36988	3.07394	3.6074	1.30495	1.76336	0.725869	0.575845
AT1G05780	AT1G05780	7.04511	5.85718	7.27833	8.38786	11.5745	9.31749	6.63166	8.6286	7.65929	9.13693	9.70097	8.66373	7.84461	9.69671	8.32107	7.73351	7.99565	9.07628	8.61257	10.8113	6.08431	9.1327	8.78746	9.21334	9.31929	9.71144	8.79752	10.2699	4.70348	3.91127	4.50497	5.45659	12.921	10.8981	10.9311	11.5461	10.3768	8.68178	9.12634	8.83884	11.246	9.79522	9.25128	9.24404
AT1G05785	AT1G05785	12.7565	11.4741	10.0013	12.5103	16.2014	12.8312	10.2592	11.266	8.97614	11.5801	13.3378	10.2976	12.2634	12.6506	11.3145	10.8075	6.06023	6.12578	6.43589	7.95415	10.4159	11.8654	10.6997	10.8561	5.62578	5.63523	5.29262	5.59131	4.51896	4.3473	4.72777	4.62576	9.3776	7.42591	9.6271	9.09277	8.54546	12.9335	9.17615	11.7132	7.1326	6.82079	6.51361	8.28931
AT1G05790	AT1G05790	12.4195	14.8575	14.2231	13.2817	17.9946	18.5153	17.5768	15.8407	11.9516	10.308	11.0232	10.0873	16.1713	14.9829	17.1324	15.8591	17.6451	17.3027	17.6783	18.4113	19.6518	22.0737	22.6757	23.6427	13.5883	13.7398	13.5222	15.0752	10.4864	10.3386	10.4435	9.6796	16.7362	17.8519	17.6136	16.8408	21.6666	23.2612	23.8111	22.6742	17.3513	17.9292	15.1053	14.5847
AT1G05800	AT1G05800	0.0890462	0	0	0	0.491856	0.408262	0.387847	0.327182	0	0	0	0	0.131082	0.100629	0.104282	0.138623	0	0	0	0	0.0545307	0	0.0428878	0.128536	0	0	0	0	0.044587	0.0378042	0	0	0	0	0	0	0	0	0	0.0500805	0	0	0	0
AT1G05805	AT1G05805	22.121	18.0337	25.4946	23.8689	36.363	34.8888	31.5476	34.1371	24.6541	25.615	23.5131	19.3811	34.9731	32.5478	35.9229	34.9879	47.9985	46.5889	48.5926	47.9947	52.2356	52.6644	57.5755	53.6867	45.0422	42.4824	39.9108	42.0881	30.2163	30.2777	33.541	34.8508	42.0266	43.9545	42.429	40.0989	51.9363	54.8053	52.1363	51.8543	37.6599	36.2707	35.491	32.9463
AT1G05810	AT1G05810	7.17697	5.748	6.85668	6.78322	7.77308	7.74239	5.51643	8.79009	11.8023	13.7056	12.1176	12.5939	14.2937	13.597	11.2066	11.7205	21.0393	22.0883	22.9857	23.2179	25.9396	32.0154	31.1779	30.8085	19.788	19.9996	19.7276	18.2677	7.6805	8.54341	8.47667	10.752	21.1452	23.663	23.9338	20.6434	27.2901	30.6246	29.4304	29.8377	17.2354	15.3313	16.2293	16.0485
AT1G05820	AT1G05820	1.61567	1.64416	0.977716	1.96482	2.00797	2.62351	2.68082	2.72087	1.88198	1.81117	1.24662	1.83069	1.93242	1.74975	1.47164	1.6244	2.44997	2.26425	2.02086	2.17783	2.22618	2.978	3.3072	3.04479	2.05919	3.04578	2.69635	1.91361	1.21349	1.51475	1.52387	1.87399	2.94455	2.07386	2.34543	2.04561	2.67495	3.52621	2.29374	2.76386	2.24615	2.07633	2.68441	2.82155
AT1G05830	AT1G05830	16.13	18.066	15.8439	17.4917	20.7311	20.5975	17.6799	19.2479	18.4914	18.4468	18.5725	18.2948	22.329	21.3005	21.2261	18.9039	19.0451	20.0316	18.2518	20.129	26.9229	24.8384	27.2427	26.8488	18.8907	20.1715	18.2747	18.5823	12.6835	12.3305	13.0132	12.9998	19.5352	19.3355	20.2605	20.1147	24.3438	22.917	26.2943	23.5323	23.1231	23.487	23.4865	23.3167
AT1G05835	AT1G05835	6.42571	9.18951	6.70251	11.5808	10.3131	8.33796	9.20349	10.9883	13.5575	9.52461	6.95986	9.95093	12.4931	6.85051	15.145	11.0413	17.1722	17.721	18.6256	15.035	20.9373	19.2242	26.0435	23.1009	19.3729	20.6507	21.521	21.2524	10.8058	14.0003	11.2568	9.04782	14.8485	14.0061	13.8948	11.6874	22.9354	24.0929	22.9338	21.8197	14.5036	14.1132	13.2712	13.7083
AT1G05840	AT1G05840	18.3416	22.9828	20.352	20.294	34.0851	39.1527	40.5217	36.834	22.8008	20.8574	23.4455	21.8825	35.0891	30.4618	31.5967	35.1427	31.6992	32.469	33.5353	35.2735	50.6585	53.4546	57.0096	58.4895	24.1041	24.2688	23.3208	25.717	14.2779	12.1689	15.1283	14.0301	26.672	25.7355	27.88	26.6103	46.8254	51.8884	50.4719	50.5335	22.4499	22.3861	21.0178	21.6055
AT1G05850	AT1G05850	415.72	411.145	361.272	365.302	136.089	134.942	149.215	117.337	456.956	447.475	451.977	472.424	298.008	291.633	288.5	291.913	456.899	481.915	472.192	474.972	486.593	526.824	488.299	528.001	382.392	379.847	368.721	356.682	429.216	418.068	431.656	426.406	435.443	450.465	451.156	432.869	546.06	582.208	582.803	552.63	355.701	352.034	345.318	365.088
AT1G05860	AT1G05860	12.1157	13.3189	10.8501	12.8493	10.068	11.7979	9.94042	8.27303	12.0396	11.7116	13.1042	10.9207	11.1272	9.93557	10.3381	9.80619	12.8134	11.442	11.9751	13.701	15.2986	15.3994	15.1823	15.6315	11.9438	11.4711	11.9561	11.0228	9.28774	8.19348	8.39183	9.46206	12.5796	13.0744	14.7455	12.0771	14.9113	15.7484	14.046	13.9898	11.6484	12.6944	12.2814	13.6906
AT1G05870	AT1G05870	34.1492	46.8346	33.2547	40.5342	13.8306	13.389	15.4408	14.7858	31.3538	30.1941	27.1166	30.7294	25.7519	24.9485	17.9343	18.9678	14.9529	10.0723	12.4353	13.2594	18.9616	12.2016	14.9669	13.1772	18.7801	18.3256	18.9772	18.1116	15.1121	14.2844	13.5951	13.7046	15.3007	15.783	17.1153	17.1004	13.7112	14.3662	14.6437	16.0939	17.5111	19.9631	19.9707	20.3202
AT1G05880	AT1G05880	2.60849	3.62011	4.95717	3.08691	2.39462	5.05331	7.681	6.74956	2.29382	1.89781	2.51725	2.5068	3.19087	3.94423	1.43419	1.88741	0.216821	0.0305113	0.064875	0.118854	0.314982	0.633207	0.637019	0.813162	0.0335461	0	0	0.0348115	0.0735841	0.0623901	0.112766	0.04352	0.0378112	0.031439	0.0673688	0.0384959	0.253886	0.238072	0.129496	0.413251	0.0298982	0.10966	0.0574511	0
AT1G05890	AT1G05890	42.9656	54.0632	47.2734	47.4356	85.7442	86.8496	84.8442	66.4743	44.0246	40.8	42.8267	40.4252	64.9404	63.4198	69.6362	65.6175	56.3303	56.2431	59.6285	65.1014	87.2031	93.6053	105.156	100.6	44.6753	44.0031	45.2933	43.5484	23.6154	23.2466	23.6958	24.165	50.9607	53.2629	55.3266	52.1076	84.2976	86.1646	91.1606	89.5296	51.3923	52.0051	49.084	46.883
AT1G05894	AT1G05894	0.507743	0.748318	0.634341	0.748447	1.26206	0.678975	0.63186	0.518221	0.473148	0.59195	0.705178	0.962344	0.872	1.43447	0.231241	0.461085	0.124854	0.245974	0.112073	0.136882	0.155467	0.2917	0.326063	0.203587	0.0772687	0.180174	0.0770328	0.200458	0.127118	0.251487	0.259739	0.300726	0.0870927	0.108623	0.193968	0.0886698	0.511691	0.548364	0.447414	0.428339	0.378764	0.16839	0.0992478	0.123727
AT1G05900	AT1G05900	12.4338	13.5687	12.7171	14.5594	8.41566	9.2837	9.37113	9.11565	10.6075	11.0251	11.7557	11.9491	10.8273	9.44989	11.2457	10.1553	8.00972	8.87167	8.89058	7.93153	9.16934	9.10517	8.64548	8.84756	8.79468	7.96987	8.17002	9.25088	14.3808	14.3864	12.6652	11.2539	7.52475	8.72929	8.75064	8.85374	7.33678	6.57244	7.81871	8.02706	8.6934	9.01677	9.24245	8.70554
AT1G05910	AT1G05910	15.6092	14.3849	15.3152	14.1874	12.6149	12.3004	8.14015	9.40212	13.9198	13.769	15.3411	13.4587	11.4653	12.561	9.56456	10.0585	8.00696	7.18553	6.72133	6.63979	8.83414	8.47142	7.48716	8.54167	8.61579	7.9339	7.97803	7.95579	8.88889	8.5144	8.83587	9.68079	9.41493	9.25157	9.42845	10.7585	7.65349	8.04903	8.11747	8.63488	12.2211	12.0295	12.0419	10.7095
AT1G05920	AT1G05920	0	0	0	0	0	0	0	0	0	0	0	0	0.0628339	0	0	0	0	0	0	0	0	0	0	0	0	0	0	0	0.0427455	0	0.0655063	0	0	0	0	0	0	0.0460992	0	0	0	0	0	0
AT1G05925	AT1G05925	0	0	0	0	0	0	0	0	0	0	0	0	0	0	0	0	0	0	0	0	0	0	0	0	0	0	0	0	0	0	0	0	0	0	0	0	0	0	0	0	0	0	0	0
AT1G05930	AT1G05930	0	0.0554806	0	0	0	0	0	0	0	0	0	0	0	0	0.0514329	0	0	0	0	0	0	0	0	0	0	0	0	0	0	0	0	0	0	0	0	0	0	0	0	0	0	0	0	0
AT1G05940	AT1G05940	24.315	27.919	29.0983	26.7816	18.7031	21.3645	22.8746	25.8305	23.1691	22.6965	24.3644	21.8759	21.2195	22.7766	20.1165	21.3359	22.0447	21.4786	21.0977	23.0556	26.3046	27.4564	25.0683	26.2537	19.1688	21.3531	21.6935	19.9529	20.1839	20.673	21.0085	19.2526	22.1701	23.7322	22.6479	25.3085	24.4019	23.474	25.6884	24.3755	23.3039	23.1651	24.3314	24.0774
AT1G05950	AT1G05950	2.60642	3.04728	3.10305	3.82396	1.2195	0.94897	1.6027	1.35201	3.88614	3.95991	3.86125	3.57806	3.4757	2.28706	2.17857	1.93331	3.4685	2.62296	2.35538	2.61225	4.20629	3.45283	3.16052	2.80328	4.0598	4.47214	3.23792	4.82309	3.62352	3.54094	3.43529	3.01482	3.78701	3.62111	3.93596	4.3054	2.33091	1.92079	2.12561	2.24193	6.28839	5.82711	5.37045	5.76849
AT1G05960	AT1G05960	24.9215	25.633	24.5626	26.0962	40.7828	37.751	35.2172	35.9267	24.8135	23.073	26.1386	24.2351	34.6563	34.6488	31.1636	29.2182	29.7679	28.2827	28.1357	30.3496	36.3702	37.9027	38.3666	39.6388	28.342	26.9706	24.8823	26.6186	17.7255	16.9607	16.9278	16.945	30.3135	32.9477	35.0638	30.8083	35.0304	33.3742	37.1372	38.1516	34.4046	36.6784	35.629	33.2957
AT1G05970	AT1G05970	6.07482	7.23738	5.27561	5.96251	7.69307	6.79317	8.20515	5.08112	7.1797	6.05915	3.97842	6.08047	8.61534	6.94872	9.65916	7.61174	10.9302	9.72088	11.2503	12.143	10.7067	11.5766	12.5597	10.1234	9.8084	10.4891	11.3295	9.82741	6.08353	5.53549	5.51411	5.7919	9.6068	9.88964	8.76206	8.77164	12.1588	10.5613	10.0968	12.1662	9.28439	9.13977	9.0361	10.3983
AT1G05980	AT1G05980	0	0	0	0	0	0	0	0	0	0	0	0	0	0	0	0	0	0	0	0	0	0	0	0	0	0	0	0	0	0	0	0	0	0	0	0	0	0	0	0	0	0	0	0
AT1G05990	AT1G05990	1.06136	0.625698	0.497247	0.375483	0.351752	0.608269	0	0.519966	2.96713	1.59908	2.35851	2.83378	1.87486	1.31936	0.580048	1.15659	0.521976	0.528863	0.281125	0.228904	0	0.121951	0.102238	0.408545	0.290733	0.225975	0.289846	0	0	0	0	0.125725	1.52925	1.45318	1.26504	1.77937	1.65026	1.71941	1.1223	0.95507	0.172745	0.422393	0.248955	0.310358
AT1G06000	AT1G06000	44.6914	40.482	37.1486	42.6188	19.4414	19.3975	17.9949	17.9049	45.5705	41.8109	47.8166	46.2369	20.7015	28.552	18.5161	15.8319	5.23594	3.33213	3.64772	4.41236	5.35205	6.11645	5.66347	4.62567	6.23895	5.03254	4.80957	4.81808	18.9763	18.5857	15.0891	12.6114	8.50402	7.75075	7.57587	7.78389	4.70121	5.96365	5.83427	5.80896	9.47225	9.96017	9.97043	9.91267
AT1G06002	AT1G06002	7.42884	6.93278	9.65736	8.5829	12.8647	10.0492	10.3275	10.4921	9.54208	7.56251	7.18819	9.13307	14.975	13.6894	18.0269	9.48113	7.57031	7.22554	6.73626	6.78402	9.42652	8.0744	7.80067	9.20983	5.62208	5.12978	4.99568	6.21464	9.65123	6.70555	5.64905	5.62878	6.19911	8.07521	5.46116	5.89061	5.49211	7.1558	6.13335	6.02242	8.16964	7.32462	9.36673	7.11055
AT1G06010	AT1G06010	14.5411	17.1112	13.625	16.8247	23.4357	14.7264	17.1041	14.15	16.4275	16.9348	15.6768	14.8717	18.6198	19.0213	19.5174	17.8305	13.1271	13.8958	12.9264	15.0361	19.5173	16.2501	15.4461	17.2518	13.641	13.4653	14.3247	13.4006	11.4701	10.2326	7.03101	6.96073	15.6829	14.7444	13.7886	13.1492	15.744	16.8877	16.8505	17.4764	15.7239	14.7647	11.6808	17.3771
AT1G06020	AT1G06020	0.425157	0.818419	0.398373	0.53718	0.603874	0.90502	0.453503	0.892658	0.0565985	0.326814	0.337417	0.240243	1.0729	0.686371	0.71129	0.61459	0.358443	0.453966	0.2145	0.392974	0.446332	0.558296	0.468048	0.350688	0.49912	0.129315	0.497596	0.172649	0.425767	0.412568	0.372843	0.287786	0.562578	0.519742	0.334118	0.0636406	0.472184	0.590363	0.214081	0.273271	0.0988542	0.302145	0.142466	0.118402
AT1G06030	AT1G06030	0.679228	0.36402	0.347148	0.491512	0.818572	1.06164	0.768423	0.907521	0.172623	0.0664511	0.343035	0.488487	0.363588	0.27912	0.0964177	0.14419	0.0607353	0	0	0	0.226882	0.070949	0.0594801	0	0.0563812	0.262937	0.112418	0.0585079	0.123673	0	0	0	0	0.158519	0.169841	0.323501	0.106677	0	0	0.138911	0.201	0.0614352	0.0965584	0.0601869
AT1G06040	AT1G06040	200.321	214.055	195.202	190.232	101.834	120.646	137.05	149.436	197.514	197.868	221.431	198.879	146.894	133.782	156.902	142.071	109.057	102.072	105.443	105.73	78.1898	70.2109	67.6259	62.7264	116.175	117.715	124.917	122.159	189.854	189.426	175.765	178.927	96.9167	86.6252	90.5328	89.5026	67.5149	74.1564	71.4432	67.9499	82.2989	82.661	82.6475	89.7047
AT1G06050	AT1G06050	5.40801	6.11372	6.16294	5.90342	11.6257	9.94026	9.88278	7.87664	5.62976	5.1383	5.1426	6.3114	6.16792	5.61593	5.78178	5.95395	3.88166	3.72247	4.25859	3.09976	4.8931	4.87031	6.00722	4.92291	3.02506	3.63062	3.76978	4.5241	5.80609	5.70884	6.35548	5.54043	4.06152	4.12749	3.6629	3.72666	5.68154	5.3671	5.43805	3.89095	3.44943	3.44165	3.73317	2.56441
AT1G06060	AT1G06060	21.6557	20.7142	23.1524	23.3539	33.6678	28.7753	27.9345	41.4121	21.5502	21.6014	25.1292	21.247	30.2139	28.2425	26.2219	27.155	28.8642	25.9204	31.0513	31.8887	28.1161	31.5093	32.2437	31.994	25.9689	29.0128	27.2278	27.9128	17.3268	18.9638	17.832	17.9501	26.7683	27.6278	27.2164	26.2458	30.3796	29.0674	32.1532	30.1464	24.2032	23.4025	25.9065	22.4309
AT1G06070	AT1G06070	12.7888	15.3423	13.7931	15.1401	17.6601	16.4528	15.0032	19.4975	15.3003	14.3005	17.4533	14.4907	13.7272	12.9092	13.1569	12.5209	13.2342	11.5336	13.5261	13.1803	16.1121	15.6511	17.2916	17.0181	12.5591	12.338	12.3086	11.6759	9.53864	9.24699	9.22551	10.3361	15.4241	15.4181	15.756	16.0175	17.4912	16.8333	16.8648	17.6817	14.9336	16.1038	16.7175	15.7766
AT1G06080	AT1G06080	4.70252	4.61317	3.72838	4.38761	2.2835	2.01387	2.18648	2.40506	7.41589	10.0658	8.61242	7.35854	5.6292	6.59895	3.59073	5.38995	9.09829	3.47619	5.4294	10.4763	42.9748	58.1293	51.3211	38.2911	4.86001	4.18091	4.28069	4.21094	9.41852	9.08267	7.61334	10.1614	22.5499	19.4571	25.9163	27.3441	42.5848	66.5817	69.0326	91.5487	23.6341	27.4552	19.0708	18.0323
AT1G06090	AT1G06090	10.3124	6.71315	9.92384	6.60632	4.61849	9.2644	5.06391	5.87134	17.1417	19.0162	20.6448	23.2064	22.2373	20.5358	12.9255	19.6985	7.01801	6.15697	6.79174	5.53013	4.3694	7.30153	7.35623	5.84696	5.44604	3.20441	4.41457	4.59512	1.11645	0.567965	0.898236	1.18855	15.1453	13.1653	14.4634	12.6744	11.7007	9.51193	5.63235	10.7844	7.75704	9.15092	10.9831	9.01931
AT1G06100	AT1G06100	7.77552	5.78145	4.46329	5.8857	0.541698	0.802915	1.48195	1.37271	6.7888	4.22156	4.54013	6.44213	2.26858	5.06633	5.41434	4.14391	0.344504	0.581749	0.556627	0.377692	0	0.0804877	0	0	1.79092	0.745719	0.63766	0.99561	4.34931	5.17464	6.9877	7.38506	0.504654	0.719324	0.385349	0.366994	0.121019	0.0756539	0.164604	0.0787933	2.16622	3.13627	3.12189	1.63869
AT1G06110	AT1G06110	26.5642	35.2043	30.2919	30.6248	28.8117	34.6065	37.3218	32.8805	27.5716	27.3295	26.126	25.5511	40.1723	38.7658	38.8986	39.8166	30.2124	30.5976	32.7072	36.8177	45.964	46.9185	46.1293	45.4629	28.4881	29.0516	28.658	28.7225	16.5104	16.2235	17.9401	15.7574	33.7281	31.6659	36.1819	32.3959	39.1726	39.6603	43.1455	43.7998	31.7542	33.769	32.1161	29.7039
AT1G06120	AT1G06120	1.01141	0.473217	0.421198	1.24241	0.682812	1.15929	0.769176	1.51402	4.13654	4.77707	4.57828	6.83441	7.60974	6.92133	2.98311	5.24841	1.60277	0.746629	1.88519	1.15125	0.206459	0.83931	0.920139	2.16289	1.38526	0.478536	0.767238	1.01158	0	0	0	0	2.42881	2.30799	2.26676	2.17842	1.01928	1.45644	0.59416	1.32727	0.640173	1.174	0.702932	1.04061
AT1G06130	AT1G06130	28.7854	36.2842	31.4378	30.0082	39.4109	32.9399	32.5334	25.7768	25.7688	23.3603	25.429	22.5387	27.6472	30.3966	26.158	27.2177	21.7223	23.1611	24.4983	24.4765	28.2045	31.2311	29.3646	34.2398	24.3015	21.1994	19.9746	21.5517	18.4774	17.9504	18.7205	19.5645	23.7487	25.8843	28.8579	27.9861	27.8407	28.2853	31.5471	31.1575	24.8462	25.3531	26.3438	25.1139
AT1G06135	AT1G06135	0	0.194487	0.216384	0.30637	1.65826	0.529394	1.00585	0.848516	0.107599	0.124261	0.213821	0	0	0.130486	0.270446	0	0	0	0	0	0	0	0	0	0	0	0	0.218815	0	0.0980416	0	0.136777	0	0	0	0	0	0	0.135663	0	0	0	0	0
AT1G06137	AT1G06137	0.609128	2.05198	1.14151	0.269368	1.34583	0.698187	0	1.49208	0	0	0	0	0	0	0	0	0	0	0	0	0	0.349946	0	0	0	0	0	0	0	0	0	0	0	0	0	0	0	0	0.715671	0	0	0	0	0
AT1G06140	AT1G06140	0.563906	0.664874	0.774958	0.864485	1.24592	1.16344	0.93567	0.368348	0.770712	0.809142	0.765777	0.780683	0.774765	0.934643	0.587015	0.702292	0.591635	1.12395	1.12852	0.972945	0.736701	0.863911	0.905325	0.651187	0.789505	1.12058	1.06087	1.10425	0.715306	0.957616	0.750022	0.489853	0.502977	1.15812	1.44765	0.984779	0.909267	0.56842	0.574201	0.761151	1.49908	1.1221	0.793627	1.02601
AT1G06150	AT1G06150	18.8901	19.1747	19.4155	19.6364	24.5639	25.0095	21.0431	17.9788	15.4007	16.6751	17.7523	16.3264	17.7379	18.9962	17.4379	17.4889	18.2693	17.3603	18.6767	20.4959	24.2165	25.7399	26.4688	25.866	16.3213	15.5384	16.8169	14.5557	12.8004	12.1674	12.324	11.4741	18.1566	18.5006	19.7456	19.4445	23.0601	21.408	24.1301	23.7753	18.5691	19.8045	18.3743	17.2607
AT1G06149	AT1G06149	23.1107	23.4169	23.6252	23.5587	30.2006	30.6531	25.9581	21.0208	18.369	20.0019	21.3589	19.7028	21.3878	22.8523	20.8792	21.1799	21.8542	20.6572	22.3176	24.6238	29.5542	31.1917	32.2061	31.6427	19.3177	17.9771	19.0267	16.4839	14.7627	14.1943	14.2945	13.2351	21.424	22.3395	23.5455	22.9248	27.6513	25.6479	29.7236	28.8387	21.3484	22.7189	21.4412	20.0005
AT1G06148	AT1G06148	0.380935	0.160408	0.178468	0.0421143	1.05207	0.43663	0.17777	0.466556	0.399353	0.153731	0.352707	0.0941739	0.28038	0.591917	0.223057	0.444767	0.187344	0.395449	0.378372	0.462131	0.524879	0.218849	0.550416	0.687337	0.173913	0.354836	0.130036	0.135355	0.143055	0.202155	0.146152	0.11281	0.147018	0.0407472	0.17463	0.199574	0.329055	0.514264	0.50351	0.267802	0.271252	0	0.260613	0.092826
AT1G06160	AT1G06160	23.4979	18.6488	20.2409	14.374	66.4301	58.7568	41.2083	35.9949	5.17448	5.39274	6.01913	3.683	5.98103	9.64222	7.19021	10.9636	6.0612	9.95409	8.60949	7.74045	11.6943	10.504	10.6325	9.70964	1.97861	2.5952	1.84928	1.34744	0.339072	0.574981	0.727465	0.561507	6.76021	7.18551	6.45698	7.80503	8.65722	7.38662	7.95617	8.22632	7.1089	5.92893	6.03589	5.41243
AT1G06170	AT1G06170	0.482485	0.406339	0.301393	0.46229	0.222088	0.184343	0.250178	0.0984885	0.824288	0.77885	0.893465	0.755434	0.295937	0.363496	0.345302	0.34426	0.118643	0.100174	0.283994	0.086715	0.246223	0.0923966	0.387304	0.232152	0.220275	0.128408	0.109801	0.152389	0.84556	0.68279	0.431932	0.523906	0.206901	0.344064	0.29491	0.252777	0.243119	0.173695	0.236199	0.407032	0.261762	0.480041	0.0943107	0.195953
AT1G06180	AT1G06180	18.4572	21.7736	17.1648	18.3419	72.5488	51.6612	35.3568	52.6619	11.9173	10.7126	12.033	10.5272	17.8081	18.6706	13.5466	10.7077	11.627	8.72623	10.1316	11.0326	9.05927	8.81658	9.38905	12.7724	8.963	7.8742	8.80978	6.35356	3.18445	3.22828	2.49308	3.35734	13.0906	13.6648	14.3872	13.3277	9.79299	9.92958	8.36558	8.942	12.6013	13.5492	15.6203	13.9477
AT1G06190	AT1G06190	47.7444	34.0382	34.891	33.586	30.2414	29.4754	30.9695	28.8992	53.2093	50.0914	51.4605	44.2053	38.4655	40.5702	42.6728	36.8762	71.6659	69.5419	63.4344	65.45	52.4365	54.488	49.853	51.7992	89.2934	88.7994	87.6363	84.6269	105.179	101.427	99.8648	97.4994	75.3186	77.8478	82.1825	75.7167	47.8105	47.1842	44.7789	43.44	105.423	97.8938	96.1719	92.2661
AT1G06200	AT1G06200	62.7204	67.1881	58.1613	61.3237	66.2791	64.2332	55.6133	52.4299	60.9856	57.6556	57.2921	58.5589	55.0915	58.6381	58.235	56.0902	58.7571	61.2991	55.8918	60.9903	69.3509	74.6747	77.6609	80.3926	52.7089	50.6812	48.8873	48.5514	42.1551	39.7625	39.4676	38.8768	61.0124	59.8326	62.9761	60.0783	70.9306	74.5331	71.7858	72.3001	58.431	56.7239	55.9365	52.8528
AT1G06210	AT1G06210	32.2648	35.9937	32.1874	32.8309	38.3922	34.9122	32.4611	31.3578	26.3269	24.6597	25.6381	29.2469	29.8916	35.2372	27.7281	23.5836	18.6308	16.5637	16.6882	20.4689	21.0364	20.2884	16.5063	20.622	21.0327	19.5235	17.7173	18.3659	17.4817	14.2431	14.5653	16.0675	22.5504	22.8366	22.1496	22.0757	19.759	20.0235	19.1427	20.719	25.1791	23.1577	24.6308	23.0783
AT1G06220	AT1G06220	34.8052	32.138	34.142	32.9487	24.4245	25.1338	22.7739	18.1264	37.7239	38.0417	38.322	37.7359	29.7427	31.4004	26.0125	25.101	28.8289	26.3293	27.1428	28.7702	32.3879	36.4695	35.4312	34.3837	32.4756	33.3063	29.6688	29.6105	28.4798	30.2612	28.9201	28.7034	32.0127	33.9123	35.2867	35.386	28.326	28.5008	28.7892	32.4172	40.693	40.3312	37.7356	36.5947
AT1G06225	AT1G06225	0.250178	1.26417	0.468833	0.221267	19.6227	28.102	25.5293	19.6101	0	0.538465	0.926556	0.247393	8.83864	5.93711	6.05499	5.25778	0	0.207767	0.441768	0.53956	0.612821	1.14982	1.44593	0.72225	0.6853	0	0	0	0	0	0	0	0	0	0.229375	0	0	0.270193	0.293936	0.281405	0	0	0	0
AT1G06230	AT1G06230	33.0446	34.9269	34.7221	35.5561	44.2337	46.9347	42.4018	47.6574	34.4943	33.9992	34.4601	33.9727	42.0549	36.8644	38.4546	34.5564	37.0636	35.8314	37.1856	39.6341	40.8672	42.0688	44.9011	46.4282	35.327	35.65	32.8516	32.3995	24.7331	23.898	25.1551	28.85	33.8841	34.3674	34.9181	31.7936	41.4665	42.0028	41.5722	40.2534	37.4084	35.6052	33.419	30.4601
AT1G06240	AT1G06240	10.6589	12.0038	10.2197	11.5099	7.94138	7.10311	6.68367	9.91752	11.0492	12.36	12.5468	10.2135	8.14939	7.56339	7.38641	7.62138	7.72086	8.0629	8.53544	8.1528	8.95619	7.83252	6.72558	7.03696	8.86489	10.9072	10.2669	9.59074	13.1566	13.6107	13.8535	12.9198	7.1432	7.8131	7.34841	7.8353	7.13743	5.93432	5.67917	5.99469	9.78365	10.5638	9.39992	9.423
AT1G06250	AT1G06250	0	0	0	0.0398281	0.0497477	0	0	0	0.0419638	0.0969236	0.16678	0.0890616	0	0	0.140632	0.0701038	0	0.0373981	0.159036	0.145681	0.165462	0.0517421	0.130134	0.130005	0	0.0479391	0.491909	0.042669	0	0.114709	0.0691092	0.373402	0.185383	0.269746	0.16515	0.18874	0.233394	0.0486347	0.0529085	0.202611	0.21988	0.134412	0.105628	0.263361
AT1G06265	AT1G06265	2.79124	3.38504	2.92924	3.19283	2.3846	2.17555	2.87147	1.82326	2.98255	3.04388	2.89453	2.68657	3.06796	2.52345	3.0509	3.1286	5.12485	5.34701	6.11173	5.85935	7.61215	7.05574	8.20955	7.44932	4.65551	4.63543	4.87844	4.09058	3.8388	3.12842	3.08421	3.08597	5.28571	5.03187	5.35713	4.56251	5.62589	7.87801	5.11595	6.15369	6.36016	6.85017	6.08161	6.02175
AT1G06260	AT1G06260	0	0	0	0	0	0	0	0	0	0	0	0	0	0	0	0	0.0590016	0	0.105923	0	0	0.0689238	0	0	0	0.0638579	0	0	0.120143	0	0	0	0	0.0513314	0.0549975	0	0	0	0	0	0.0488157	0	0.140703	0
AT1G06270	AT1G06270	4.56245	4.33143	4.43047	5.46588	2.79504	2.18689	2.6324	2.94636	3.82643	3.83869	4.30117	3.15817	4.09078	3.3279	2.33153	2.32449	2.08062	1.41227	2.05073	2.23633	3.45438	2.57349	2.3173	2.315	2.61316	1.98695	2.11435	2.16152	2.82447	2.53567	3.40544	3.04617	3.15883	3.0169	2.5859	3.30295	2.50796	2.86689	2.29038	3.26577	3.91541	4.7044	3.37268	3.92153
AT1G06280	AT1G06280	0	0	0	0	0	0	0	0	0	0	0	0	0	0	0	0	0	0	0	0	0	0	0	0	0	0	0	0	0	0	0.150471	0.464575	0	0	0	0	0	0	0	0	0	0	0	0
AT1G06290	AT1G06290	43.9057	40.4639	47.6563	43.2927	82.2566	85.9542	72.2125	92.5279	41.8542	39.6224	43.0117	47.0133	61.5058	59.846	51.0243	48.4735	44.0472	42.6795	41.1787	44.4261	36.7058	37.6072	39.3525	43.3496	45.0826	45.3554	43.7368	43.1864	27.1415	27.5204	29.6573	32.7336	46.7985	49.3153	51.3042	47.1452	40.586	38.6456	40.1392	42.7872	46.0128	44.3171	44.976	39.2768
AT1G06310	AT1G06310	0.852779	0.333447	0.37099	0.700358	1.37948	0.907643	0.606423	1.56668	1.8164	1.5077	2.14317	1.74681	1.79335	1.68648	0.642016	1.01938	0.419396	0.227641	0.645365	0.492642	0.373022	0.244962	0.293378	0.205161	0.417139	0.583606	0.277244	0.49059	0.0305001	0.103441	0.093481	0	0.846314	0.755811	0.642249	0.765901	0.473553	0.394716	0.0357835	0.479611	0.570059	0.666646	0.595327	0.801533
AT1G06320	AT1G06320	0.567119	0.477616	0.797086	0.668777	1.98394	0.541697	0.470501	1.38917	1.14504	1.32235	2.97554	1.77589	1.66967	2.02948	0.368975	1.76573	0.278909	0.156994	0.0834524	0	0.578827	0.325812	0	0	0.0863046	0.100622	0.258123	0.0895601	0	0	0	0	0.38911	0.0808835	0.346641	0.594234	0.408235	0.306245	0.111052	0	0.153839	0.188082	0.591221	0.18426
AT1G06330	AT1G06330	1.18209	0.110614	0.861481	0.813156	0.870586	0.903279	0.6538	0.643458	2.44789	0.706735	1.70255	1.68846	3.48021	3.85912	2.35852	1.84022	0.387567	0.327234	0.115964	0.141635	0.321731	0.603658	0.885634	0.505575	0	0.279644	0.358684	0.248903	0	0	0	0	0.405525	0.674366	0.72253	0.96336	0.680732	0.567405	0.925899	0.147737	0.213772	0.653389	0.308082	0.896158
AT1G06340	AT1G06340	0.0862445	0.0726333	0.0808112	0	0	0	0	0	0	0	0	0.0852847	0	0	0.0673341	0.0671309	0.08483	0	0	0	0.21126	0.297287	0	0	0.157497	0	0	0	0	0.0732294	0	0	0.0887607	0.073802	0.237219	0.0903679	0.0744988	0.186289	0.202659	0.0970095	0.0701851	0.171615	0.0674324	0
AT1G06350	AT1G06350	4.22126	2.07763	2.61976	2.1334	0.363375	0.251347	0.477558	0.402861	3.16735	2.35988	2.13189	1.13844	2.09822	3.22153	2.26846	3.49909	2.75004	1.7756	1.9361	2.00998	7.72155	6.92894	7.02346	6.96374	2.50283	2.33442	1.79654	2.75308	2.79991	1.58265	2.22952	2.98722	6.60125	5.62949	8.24313	7.23776	6.06148	5.5655	6.44104	9.00299	5.13053	5.12712	4.37208	4.38171
AT1G06360	AT1G06360	36.5025	25.1187	18.2552	23.1846	2.11601	3.57548	8.1725	5.2281	37.8402	33.9822	29.5919	34.0398	18.69	14.6572	18.2016	13.4609	20.6702	16.9525	20.6319	22.3664	13.8747	11.633	13.1791	9.84817	20.7375	24.7019	24.9086	20.2752	58.6412	60.1756	65.3417	59.8351	22.3039	21.2613	21.7763	23.0518	10.4001	9.87048	9.96628	13.6657	50.5927	50.4743	45.3993	43.6344
AT1G06370	AT1G06370	3.23999	4.28246	3.28886	3.46257	4.42439	3.35264	5.936	5.73187	4.36112	2.85721	3.83321	3.96041	5.49813	3.20375	5.41047	4.02809	6.28517	6.83897	6.27745	6.7936	8.04672	7.60066	8.40932	8.44429	5.4237	6.51506	5.93966	6.90744	3.46995	3.89731	4.07453	3.57144	4.7702	5.23705	5.32228	4.99804	8.04634	6.7068	7.34904	7.5925	4.87053	5.82034	5.87576	4.25463
AT1G06380	AT1G06380	11.3123	9.19272	11.9634	10.9412	8.25823	7.58262	5.51579	11.1812	13.0691	12.1739	11.8829	12.8219	9.44612	11.3634	6.45609	7.31198	10.2809	8.62551	7.88507	9.70189	12.8828	12.1618	11.7253	14.3237	8.93982	10.282	6.80483	8.58753	9.27484	8.76264	8.02043	7.91471	10.4169	10.3596	11.888	12.5464	10.0003	12.0745	10.6483	9.82229	13.1897	14.3485	14.431	11.5422
AT1G06390	AT1G06390	41.8074	45.0282	46.0151	48.5376	73.4631	60.7436	47.1908	56.9256	46.6775	47.1884	45.797	43.943	54.7242	50.8388	49.8955	50.1727	63.9799	64.8436	64.9168	65.6987	71.3979	76.4533	77.7077	77.9706	59.3932	58.9238	57.3894	56.2402	30.7813	32.6984	31.026	34.2711	63.874	63.4223	66.5484	66.388	73.7531	77.2462	79.4221	78.1555	58.4612	59.7961	57.9178	59.3846
AT1G06400	AT1G06400	61.7775	60.8324	65.9599	66.0705	88.616	90.9997	86.7352	86.6049	69.3182	65.3918	63.9464	64.2228	85.0641	83.4894	74.2524	86.8019	90.4297	84.5611	92.1372	93.7435	92.3482	101.706	108.58	110.668	69.4832	68.9359	65.0606	68.0217	36.9293	37.606	43.32	45.5588	77.8609	79.9208	76.8569	73.8931	107.932	115.853	115.91	100.277	65.8977	64.6166	58.4581	58.5481
AT1G06410	AT1G06410	53.9414	55.8691	58.5118	59.0434	69.6027	68.7613	57.8855	50.7105	63.7536	60.8642	67.0237	61.2574	68.2672	69.7112	63.7632	60.9135	102.265	93.1093	94.3341	96.638	84.4529	89.7114	94.4783	99.514	87.2956	95.6565	87.6106	88.1295	53.6989	57.582	63.6338	72.4811	86.4367	89.0898	87.7103	85.8055	103.916	104.957	100.389	100.196	96.1772	90.7313	86.458	83.6338
AT1G06420	AT1G06420	1.78218	2.35858	1.61027	1.46365	0.914093	1.53206	0.792084	0.935466	2.90632	3.69885	2.12159	2.58058	2.43609	2.22979	2.28589	2.17991	2.2538	1.58579	2.19167	2.26501	2.10481	2.19401	1.65541	1.59252	2.61528	3.11689	1.79614	2.41238	3.56948	2.37794	2.7839	3.54364	3.40633	2.451	2.9762	2.6677	1.48448	1.99351	1.34608	2.3626	4.45458	4.24291	3.63291	3.28813
AT1G06430	AT1G06430	75.4859	108.45	77.0175	92.6766	55.9954	62.104	94.2515	53.8964	57.2903	44.0777	48.0445	50.9804	72.6395	76.2056	88.4018	68.7888	73.8079	76.7134	85.8021	77.3004	53.9995	49.7596	46.8867	51.4946	59.199	60.5967	59.0946	56.9021	79.1779	66.3971	66.5471	68.2887	45.6059	44.8341	43.8324	44.9084	61.8968	59.4831	60.67	58.9325	43.3649	41.0288	44.4184	37.8515
AT1G06440	AT1G06440	1.96072	0.857395	1.09525	1.20056	0.874751	1.16692	0.610004	1.10835	1.40548	1.17676	1.39648	0.857591	0.888093	1.1931	0.883156	0.851141	1.11263	1.15863	1.16519	2.39898	1.89344	1.99294	1.67078	2.24969	2.20345	1.52533	1.23566	1.32192	1.69921	1.37669	1.50453	1.69728	1.82389	2.16184	1.86682	1.7779	1.49826	2.15831	1.99356	1.65409	2.36274	2.58855	2.44696	1.9479
AT1G06450	AT1G06450	3.97456	2.80865	3.16768	2.78796	2.37203	3.45602	1.87612	1.79049	2.98004	2.50737	1.86117	2.39434	2.21927	3.30413	2.88907	2.45363	3.32521	2.23847	1.97643	2.66027	2.40599	3.30699	2.72841	3.29723	2.54455	2.62623	3.11899	3.28984	3.06526	2.17226	2.10332	3.35521	2.63298	2.58018	3.60218	3.39869	3.47272	2.81235	3.59625	3.1346	3.346	3.86352	4.28635	3.07254
AT1G06460	AT1G06460	87.3679	98.4379	76.5636	67.6297	42.3221	71.0246	80.3118	55.6754	48.7341	45.4893	53.6118	40.4773	58.0604	50.9642	79.0511	87.178	189.117	211.949	214.887	223.417	279.827	253.182	225.035	225.702	128.888	137.459	130.46	131.362	125.704	119.549	125.597	126.153	184.491	194.323	197.169	190.418	231.516	229.813	247.229	268.906	165.089	167.865	172.164	172.574
AT1G06470	AT1G06470	19.4528	16.2124	18.2589	18.0696	12.8865	13.0613	11.9152	9.99252	17.2164	17.5966	18.4796	17.4361	15.8812	18.4781	16.0035	15.4303	16.2156	15.8472	15.0022	15.5965	19.0768	16.3084	18.1213	18.298	13.7602	13.4229	12.552	13.0334	16.4084	16.002	14.9268	15.9345	18.806	18.2908	18.6699	18.8286	19.8614	19.6983	19.33	17.7854	17.9431	19.9581	20.9298	17.8437
AT1G06475	AT1G06475	3.64816	4.51259	3.52515	3.12575	1.00755	0.78404	0.567493	0.837775	3.71831	3.55796	4.22228	4.17124	2.18169	1.93251	1.60214	3.37208	2.01843	1.13615	1.6105	1.10644	1.81519	2.09588	2.30617	2.5233	1.97783	1.94184	1.97179	2.16046	2.28337	2.61362	2.79936	2.43083	1.75996	2.53649	1.88145	2.1502	2.265	2.21626	2.54497	2.43646	1.11332	2.15512	2.58499	2.4447
AT1G06480	AT1G06480	0	0	0	0	0	0	0	0	0	0	0	0	0	0	0	0	0	0	0	0	0	0	0	0	0	0	0	0	0	0	0	0	0	0	0	0	0	0	0	0	0	0	0	0
AT1G06490	AT1G06490	3.03069	3.37659	3.04683	3.27612	3.17369	3.71504	3.19534	2.80969	4.2265	3.90704	4.65737	4.47464	4.55431	3.56762	3.00701	3.17813	2.01838	1.66921	1.57948	2.22417	2.80971	2.6359	2.8687	2.70382	2.0082	2.20691	1.91585	1.81473	2.8875	2.93968	3.51256	2.76733	2.94583	2.29629	2.22874	2.30451	2.82701	2.02299	2.62114	2.4147	2.62907	2.785	2.0981	2.25658
AT1G06500	AT1G06500	18.6833	19.8393	17.9291	17.0032	13.6602	14.2766	14.1524	7.07481	16.401	20.7862	14.3739	14.459	14.4822	14.5856	15.7846	15.456	15.9799	14.7665	16.8144	19.3685	20.4508	24.0599	22.6919	24.146	17.7187	18.4481	16.843	16.4201	18.9812	16.1703	15.5137	18.2825	16.3487	19.6179	20.7708	21.1843	25.8064	19.3007	22.0572	20.8123	19.8317	22.001	19.1244	18.4748
AT1G06515	AT1G06515	29.3857	27.6595	28.1643	28.1132	39.3587	34.6727	25.3354	35.2848	30.1577	30.177	29.3421	32.2874	32.5138	35.704	28.5656	27.8813	30.7928	30.3059	35.6106	33.5522	36.3436	38.0677	38.6669	40.292	29.9006	28.9314	30.4212	33.3033	22.5036	20.4664	21.8854	22.296	34.394	32.5421	36.0109	34.6143	37.5777	39.6189	34.7512	33.5937	36.8867	35.0651	35.8154	32.3869
AT1G06510	AT1G06510	16.1597	15.6924	13.3391	16.6257	12.9943	15.6243	12.3806	8.88611	16.0318	17.0356	13.4355	15.4363	11.3276	14.1	14.4188	13.8191	19.4088	18.3502	17.7616	19.204	23.1579	23.8095	18.3723	23.4848	19.9245	19.1338	17.9123	18.1241	28.4026	23.1951	21.0461	21.9418	17.1402	20.6484	22.3751	19.0632	21.5081	19.7676	22.3443	19.2896	21.3362	20.5621	19.9837	19.2335
AT1G06520	AT1G06520	1.83288	1.96944	3.76053	2.62725	3.52598	3.73084	2.08429	3.94783	2.14972	1.90446	2.51633	2.84372	4.27976	5.3925	3.28142	4.15703	3.20156	2.38823	2.92962	2.69212	2.20616	1.74289	2.98319	3.28433	1.55816	1.24473	1.0356	1.34744	0.727874	1.0733	0.994202	1.64709	2.27663	1.78479	2.23097	1.85429	1.80164	1.63822	1.63367	2.06166	1.00296	1.54062	1.186	0.585246
AT1G06530	AT1G06530	74.9245	78.9807	66.5528	73.9936	82.0069	68.7321	58.2749	64.9745	68.7068	70.0788	69.3726	65.8861	63.4743	73.0211	66.7897	60.1788	67.6986	63.0063	59.825	60.9353	92.9203	87.3889	87.7334	86.6786	66.6907	63.9697	58.1905	60.094	64.457	58.9745	60.3379	59.4167	68.8301	67.1811	69.4436	72.9085	78.1858	72.9763	78.6507	80.6001	72.7379	73.1066	63.103	64.3304
AT1G06540	AT1G06540	2.62044	2.98578	2.02206	2.18129	3.91657	3.71029	2.49371	3.39821	1.14913	0.995304	1.42721	2.59128	1.13454	1.91613	0.240691	0.59991	0.303231	0	0.136095	0	0.188791	0	0	0.29667	0	0.164095	0.140316	0.292111	0.308729	0.392646	0.11828	0.365185	0.158641	0	0.141326	0.161513	0.266301	0	0.181105	0.346767	0	0.153363	1.08469	0.600986
AT1G06550	AT1G06550	73.9827	90.5537	79.1926	80.3548	75.8	71.0132	68.0086	54.4756	57.0191	55.5108	59.8679	60.5471	47.3535	51.8147	32.1104	38.5481	22.3509	20.0446	20.4904	22.6325	27.0403	24.0226	24.8438	23.9258	22.4806	21.2258	18.5909	20.2691	25.3834	23.1327	20.2549	18.694	30.7805	30.0486	31.6766	33.1986	24.0566	22.9723	23.7106	25.0151	34.0941	34.2942	33.3565	31.4336
AT1G06560	AT1G06560	10.6059	10.0584	8.36406	10.0955	8.79605	8.19948	7.39274	9.82805	12.8396	13.5894	13.3622	11.5336	9.6148	9.52515	9.15462	8.57016	12.8794	13.0183	12.1101	10.7997	14.7422	14.0804	16.1186	15.5638	13.8304	11.5886	12.3726	12.4955	9.09495	9.61282	9.45094	9.9844	12.804	12.456	13.8019	13.7202	12.5198	11.7568	13.8862	13.4691	14.1488	14.8226	15.8312	12.1871
AT1G06570	AT1G06570	46.5311	59.3978	55.6429	52.5576	246.28	263.548	297.424	236.527	38.0923	36.7684	38.3379	44.324	163.637	111.372	174.529	124.328	167.949	190.243	212.344	198.734	144.169	190.958	239.391	239.192	109.745	108.639	114.557	107.834	39.1031	34.6396	36.1106	37.2438	67.7724	77.3737	74.2108	64.7378	230.694	243.054	255.429	216.631	43.5599	38.8088	37.5581	36.2758
AT1G06580	AT1G06580	1.50545	1.60423	1.9288	1.87495	1.76493	1.86642	1.45289	2.78455	1.86097	1.38867	2.21886	2.09633	2.17089	2.60399	1.72706	1.93708	1.9945	2.29638	2.52273	2.12038	2.67169	1.94159	3.19627	2.1583	2.46868	1.8643	1.92976	2.38714	0.923029	1.48696	1.41451	1.27379	1.86557	1.97183	1.88731	2.1247	2.49469	2.82043	2.92389	2.79923	1.85019	2.01748	2.30611	1.70697
AT1G06590	AT1G06590	5.40267	6.15792	6.45159	5.76634	9.24436	7.93861	6.5717	7.71154	6.05663	6.22947	5.90501	5.52331	6.06945	6.79401	5.37565	5.58075	4.85458	5.09405	5.07492	5.27844	5.64688	5.36757	4.93033	5.27726	5.21128	5.44874	4.99199	4.92673	3.60017	3.17321	3.74044	4.25851	4.82868	4.86656	5.41898	5.8738	5.00022	4.78199	4.51018	4.8205	5.65284	5.6178	6.17751	5.70162
AT1G06610	AT1G06610	0	0	0	0	0	0	0	0	0	0	0	0	0	0	0	0	0	0	0	0	0	0	0	0	0	0	0	0	0	0	0	0	0	0	0	0	0	0	0	0	0	0	0	0
AT1G06620	AT1G06620	42.4039	46.6841	46.5451	40.5247	90.6164	67.7879	54.5913	59.2858	29.9658	26.5715	29.1865	35.5144	46.1874	61.7606	54.4405	35.8549	11.519	8.79377	9.95209	11.7342	10.0404	12.2227	10.9989	13.9463	7.26248	7.1686	7.01821	7.25901	2.39444	2.81741	2.92056	2.31209	15.5179	16.0345	16.5086	18.3554	21.7076	21.08	19.6646	21.4059	9.37156	12.7684	10.7972	12.2711
AT1G06630	AT1G06630	15.6199	19.5112	17.2076	16.9562	24.8802	23.4552	22.1505	26.1008	19.1443	18.8076	18.9843	17.2821	22.2805	20.1147	22.1212	19.007	22.9463	23.7653	22.4148	22.2843	26.5953	27.9182	29.587	30.1014	18.4636	19.679	15.174	17.5538	11.1558	11.3436	12.5122	12.7655	20.5203	20.5159	20.39	18.8196	30.2277	27.5493	26.0817	28.1023	19.4776	18.0305	19.7235	18.1363
AT1G06640	AT1G06640	147.605	134.27	137.539	157.985	82.0084	88.0599	89.5507	102.842	209.48	195.316	214.877	218.966	183.268	213.684	212.546	179.862	83.1284	64.9745	70.964	84.9562	88.5805	92.8744	94.4676	95.2056	64.5012	59.4154	55.1535	56.5903	53.4326	59.7489	48.3415	52.966	102.522	100.347	100.55	104.951	108.878	110.239	106.138	105.143	60.0413	70.0569	63.9814	66.6382
AT1G06645	AT1G06645	9.25561	9.87623	10.4433	9.72894	9.4754	9.05362	7.41744	5.69764	8.21858	10.0649	8.07621	8.48174	7.13341	6.84524	8.02068	8.37366	11.1533	11.4695	10.3111	10.5034	13.8881	15.1448	12.7433	13.5234	10.6192	9.74994	11.2044	11.4331	10.9188	10.4099	10.6718	10.1028	11.2213	9.78634	11.1962	9.90123	11.9717	14.6016	13.3796	12.4822	8.91238	9.06408	9.81315	8.36034
AT1G06650	AT1G06650	48.2723	53.0548	60.3232	56.5179	66.8568	73.9009	68.1968	59.2973	36.9459	40.9233	35.2091	39.6301	50.5065	53.4743	61.9823	53.7091	50.996	56.3544	57.8505	54.0588	42.9559	46.7595	41.6337	52.323	47.5141	46.6201	47.2823	43.4366	60.5105	58.7503	54.6657	55.8268	38.8421	40.3294	41.6807	38.2972	45.3616	44.1572	44.0624	40.9511	38.1978	35.7957	37.184	33.3497
AT1G06660	AT1G06660	3.64722	3.47907	3.66155	4.50946	3.98804	2.4315	2.6399	3.46419	6.17318	5.08649	5.58231	5.15233	4.93065	4.2478	3.10902	4.40321	3.80703	3.21439	3.25302	3.89286	3.2363	2.39467	2.25852	2.36373	4.89338	5.66552	4.37027	5.28955	2.45981	2.78082	2.74152	3.26231	4.32816	3.4395	3.44631	4.48452	2.53969	2.45183	2.36121	1.67447	5.48185	5.77636	5.55784	5.51389
AT1G06670	AT1G06670	20.2836	19.9209	20.7284	21.9612	14.5684	13.6967	11.5762	14.1701	23.2987	24.3873	24.7382	22.906	18.691	17.8529	14.1329	14.6817	14.1766	15.2879	13.3314	13.9564	20.3997	19.2363	21.156	20.3095	15.7454	15.9697	14.5816	14.0864	15.1824	14.5066	13.7775	13.5162	18.3022	18.018	18.597	19.905	18.474	16.3868	17.0204	19.2173	22.0621	20.8881	20.7943	19.7947
AT1G06680	AT1G06680	3459.98	2970	2928.23	3511.22	1221.41	1800.21	2855.11	2227.76	3947.86	3760.81	3334.03	3656	2678.76	2301.15	3656.02	4226.78	4351.2	4074.58	4128.82	4297.5	3556.18	3067.96	2770.66	2594.31	4844.97	5075.91	5169.1	5092.76	5925.38	6201.71	5917.92	6063.86	4291.93	4372.63	4089.1	4281.51	3190.17	3145.15	3076.13	3171.41	4752.34	4713.32	4687.98	5209.91
AT1G06690	AT1G06690	33.4514	38.684	31.9394	32.1951	20.859	23.4111	26.7733	24.6821	32.0604	32.58	36.646	31.8224	30.0666	27.9544	35.4365	25.8612	28.6169	28.5346	32.9408	32.3526	26.6835	25.9195	23.5222	24.2851	35.8073	37.302	33.8387	36.1688	48.0445	44.1657	43.6398	49.6794	24.8512	25.8677	24.8438	29.1535	25.3278	25.0982	23.3575	25.0164	38.0819	36.8946	34.2461	32.5614
AT1G06700	AT1G06700	50.4583	52.7785	49.2157	49.4456	60.5986	60.2043	58.3043	56.2316	49.3662	46.2553	50.0241	49.711	61.6677	57.6161	66.5279	63.0516	62.2694	63.9022	62.8943	67.3363	88.5355	89.9658	96.812	95.5229	52.2135	53.8757	52.1224	51.5486	35.142	33.1138	34.4516	34.0468	65.3867	65.9094	70.5134	62.9095	87.335	85.9019	96.629	92.8897	60.5696	56.7818	61.2491	58.9606
AT1G06710	AT1G06710	2.85896	2.7495	2.45417	2.59383	2.36367	2.15645	1.8363	2.03316	2.80168	3.25536	2.86913	3.31962	3.14964	3.23084	2.24649	2.3115	2.55808	3.1249	2.88248	2.96363	4.06635	4.1539	4.38856	3.94047	3.73887	3.37733	3.05584	2.95362	3.04778	2.81906	2.64669	2.68744	3.49288	2.60434	3.01019	3.32421	3.91949	3.44626	4.96269	3.36105	4.30797	4.36765	4.139	3.57774
AT1G06720	AT1G06720	20.8425	18.1774	18.9156	20.5533	15.4453	11.1249	8.02366	12.7108	24.6757	23.7658	24.4857	23.0995	17.0791	17.8259	12.2481	12.3051	17.4993	18.1397	16.195	16.9357	24.7461	27.2166	26.1051	25.399	19.8023	17.6366	18.1255	18.0174	16.7117	17.141	17.5674	17.0926	20.3683	19.9747	21.7964	21.3694	19.8952	19.7172	19.5054	20.2639	20.7915	21.1143	19.7334	18.6688
AT1G06730	AT1G06730	10.2191	8.47145	8.34466	10.4549	7.99806	7.01327	6.1792	7.14081	10.0005	9.58401	12.1017	10.739	7.73381	7.85581	8.02847	7.38085	8.88568	9.17851	8.31547	7.08173	9.57347	8.13465	9.28836	9.09418	8.65818	10.0263	7.90271	9.50079	10.9717	9.4386	9.19348	9.41094	9.36335	9.21085	10.1037	10.2714	9.02109	7.9921	8.7697	8.61201	11.575	10.9642	11.647	10.9912
AT1G06740.1	AT1G06740.1	2.53055	2.64348	2.94111	2.5394	2.36547	2.67742	2.42241	2.26489	3.46918	2.61855	3.2442	2.88737	2.97294	3.35466	3.09651	2.25382	2.51298	2.62696	2.21276	2.88626	3.24836	3.21516	3.65641	3.34838	2.39947	2.97885	2.63579	2.3286	2.21741	1.9214	1.77374	2.53642	2.30387	2.43615	3.03401	3.54388	2.77442	2.47021	3.08752	3.17484	3.14842	3.67976	3.00591	3.13065
AT1G06750	AT1G06750	0.677238	1.03701	0.721106	1.06182	1.63235	0.846824	0.881097	0.527837	1.14745	1.32513	1.08309	0.91323	1.26883	1.00884	0.865217	0.862605	0.605573	0.715824	0.434865	1.29463	1.05568	0.919635	1.42334	1.12569	0.7027	1.21252	0.756599	0.641702	0.739865	0.575037	0.590532	0.619906	0.76036	0.737588	0.931387	1.32247	0.904098	0.964145	0.940366	0.900275	1.20247	0.857573	1.03496	1.05019
AT1G06760	AT1G06760	169.7	174.531	167.247	181.755	168.75	203.859	218.957	153.296	153.503	151.441	144.915	150.996	191.827	175.107	210.974	207.006	202.36	215.05	240.882	259.464	280.101	301.452	297.294	290.265	188.645	192.046	202.548	198.775	135.364	128.867	116.725	114.35	196.617	196.049	199.498	214.601	260.752	275.54	309.811	313.908	243.394	246.701	242.667	248.284
AT1G06770	AT1G06770	5.57946	5.62806	5.43471	5.54805	10.2033	6.97332	7.92405	7.64428	4.81744	5.15634	4.96171	4.92511	6.40359	5.55713	6.17727	5.2017	5.27091	7.27768	6.42905	6.83245	6.87218	7.46121	7.65188	8.37232	5.72774	6.20811	5.76764	6.06327	4.26162	4.22893	4.25712	4.48082	5.93689	5.98837	6.53167	4.78927	7.13408	7.04717	7.88866	8.36785	6.00272	5.83346	5.84123	5.25405
AT1G06780	AT1G06780	16.199	16.3617	16.7681	16.8197	17.8047	17.6579	14.3359	14.3437	14.8913	14.6942	16.3668	16.5328	16.9177	18.3988	12.3694	14.249	8.18197	8.61261	9.13217	8.6161	10.7244	11.9788	11.3076	10.9015	8.12009	7.80674	7.32313	6.37813	6.11074	5.04174	5.66911	4.79718	11.0956	11.7077	12.1676	12.5007	10.7074	10.1364	9.70908	11.7574	9.84243	9.99141	10.6759	9.94842
AT1G06790	AT1G06790	8.27429	10.1604	11.4044	10.7647	7.48954	5.38449	4.65023	5.75353	10.6953	11.145	12.4556	11.5607	8.64406	8.08371	7.08519	7.77018	5.40822	5.67464	4.90171	5.87166	8.49959	7.36043	8.43318	7.70563	6.97021	5.22824	5.87986	6.06977	7.0566	7.1616	5.89856	6.19702	8.18605	8.08554	7.34154	9.56485	5.48736	6.68778	8.15356	8.58653	8.55813	9.6664	10.5598	8.48136
AT1G06800	AT1G06800	16.2662	19.4592	17.6986	16.6745	30.654	29.6523	24.9172	17.6218	10.1383	9.8776	8.59682	10.7234	11.5812	11.1734	11.8142	9.46145	10.4223	10.0948	9.23019	11.197	11.3284	12.0528	12.2209	13.0614	8.08954	8.1111	8.54873	8.66332	4.18772	4.664	5.38422	4.15591	10.3581	10.9475	11.6969	10.1372	11.908	10.7931	11.7	12.6362	9.69004	10.7187	10.1967	9.36098
AT1G06810	AT1G06810	0	0	0	0	0.114363	0	0	0	0	0	0.191701	0.204739	0	0.116987	0.0808231	0.0805791	0	0	0	0	0	0	0	0	0	0	0	0	0	0.175799	0.158872	0.245256	0	0.0885866	0.284741	0	0	0	0	0	0	0	0	0
AT1G06820	AT1G06820	22.0452	23.5328	20.2426	20.6134	14.7377	16.9901	21.5077	12.9786	23.5996	23.4527	23.7697	23.6399	21.2631	20.9566	22.5546	20.2771	28.0429	27.2657	27.0378	28.8399	28.1591	26.4534	25.9747	26.2221	28.6818	28.8066	27.8478	28.2695	27.3196	26.5645	27.0317	28.5795	29.9914	29.633	32.3855	28.8492	26.5891	28.339	27.0127	24.8323	33.5448	33.3238	31.1688	28.9271
AT1G06830	AT1G06830	8.11467	2.41819	3.62626	2.87077	10.8952	4.29281	1.24287	10.0915	10.2375	9.00142	9.24722	14.9377	2.38906	4.23239	3.11897	1.55478	8.71834	5.28758	6.1725	6.05803	9.93863	9.61071	6.73433	6.72765	7.97933	7.70822	9.43232	7.80716	30.6299	30.6344	38.6053	35.3438	13.2338	12.3923	14.9943	13.9967	5.60762	4.31452	6.16044	8.56584	15.1376	11.6756	12.5917	15.2106
AT1G06840	AT1G06840	24.7509	30.9884	30.1017	27.6215	48.3014	47.7511	40.8746	50.714	22.0854	22.4061	23.7456	23.1478	22.0557	23.5725	16.1184	17.2209	16.9572	17.4848	17.3173	20.0806	19.423	22.9837	23.1108	23.2752	12.8278	13.5887	12.9835	12.1317	6.07968	5.30351	6.76374	7.46804	16.0808	15.9017	18.3933	16.5351	22.523	23.1795	20.4384	20.924	13.6497	13.7841	15.3052	13.523
AT1G06850	AT1G06850	11.4543	10.7357	9.34781	11.4786	9.13318	8.15267	6.37994	12.6712	15.107	15.5078	17.7899	14.1585	10.9463	10.9608	8.83458	9.70668	11.3118	9.16734	9.50141	10.4592	16.8007	16.5044	16.2389	16.1784	11.0491	11.4562	9.79614	11.4659	8.78804	8.43158	9.25	8.26135	16.8271	15.0584	16.8114	16.4059	18.7912	20.5014	20.5665	22.547	14.5835	16.1294	12.7837	14.0009
AT1G06860	AT1G06860	0	0.747816	0	0	0	0	0	0	0	0	0	0	0	0	0	0	0	0	0	0	0	0	0	0	0	0	0	0	0	0	0	0	0	0	0	0	0	0	0	0	0	0	0	0
AT1G06870	AT1G06870	12.295	12.5577	12.3959	14.7413	13.5	11.8224	9.99883	12.7242	13.1289	12.588	16.5396	13.6734	13.423	15.288	10.4745	10.4719	10.8068	10.2728	10.7564	11.4046	12.1293	10.9925	10.5475	11.0405	12.1477	10.9007	10.5458	11.1895	11.3396	10.6617	10.2373	9.25204	14.0768	13.3994	14.3221	14.645	12.7834	11.5432	11.9428	12.9049	17.0916	16.7689	15.5155	15.8089
AT1G06880	AT1G06880	0	0	0.832014	0.785342	0	0	0	0	1.65491	0	0	0	0	0	0	0	0	0	0	0	0	0	0	0	0	0	0	0	0	0	0	0	0	0	0	0	0	0	0	0	0	0	0	0
AT1G06890	AT1G06890	45.0075	45.4997	47.6589	49.0682	61.9503	58.3978	47.1268	56.8511	46.5215	49.8155	53.1096	49.4096	57.2564	56.6098	45.0833	45.7124	45.9089	45.1871	47.436	48.5341	55.3334	57.7547	58.8764	58.4067	40.7444	41.9524	39.4917	37.6644	25.7249	25.6585	24.8606	27.1381	50.5876	51.4255	52.708	49.4882	56.157	57.6098	63.0239	56.635	46.0878	48.3092	50.4627	47.0776
AT1G06900	AT1G06900	26.2671	26.3219	24.3354	26.3684	21.5287	20.728	16.7578	26.6508	31.6726	31.5477	32.6328	32.3315	30.5908	28.2852	25.3678	23.9828	25.3276	25.5114	23.6155	26.0345	30.4292	33.7893	35.1421	34.4318	26.1936	25.2884	24.3985	24.5037	20.4408	21.2366	21.0061	20.7215	28.8014	29.2271	30.3662	27.9488	29.9817	30.0044	29.2772	29.8782	29.6738	28.9092	28.0478	26.4853
AT1G06910	AT1G06910	4.9099	5.00371	5.33512	4.45198	4.1934	4.25629	2.97804	3.73947	5.22899	4.35141	4.73708	3.63124	4.67673	3.91663	3.73669	4.17503	3.73363	3.4608	4.07999	4.71621	4.29536	4.26669	4.4911	5.08222	4.25711	4.04094	4.39435	4.61317	4.00793	2.97782	3.79919	4.05659	4.92575	4.09563	4.53946	4.49616	3.88481	4.94622	3.4903	5.05865	4.7679	5.37763	4.64542	4.42382
AT1G06920	AT1G06920	0	0	0.0623133	0.0588178	0	0	0	0	0	0	0.12315	0	0	0	0	0	0	0	0	0	0	0	0	0	0	0	0	0	0	0	0	0	0	0	0	0	0	0	0	0	0	0	0	0
AT1G06923	AT1G06923	0.564733	0.216185	0.38484	0.317846	1.36118	0.882683	0.0638892	1.63484	1.10035	1.60224	1.52112	1.62458	1.2092	2.03061	0.841731	1.11892	0.555471	0.34109	0.407952	0.27681	0.314395	0.294947	0.494537	0.345833	0.32814	0.437229	0.140202	0.0486454	0	0	0	0	1.37377	1.09832	0.847267	0.537939	0.886948	0.554467	0.965107	0.404233	0.250677	0.357555	0.401409	0.400331
AT1G06925	AT1G06925	0.145937	0.24581	0	0	0	0	0	0	0	0	0	0	0	0	0	0	0	0.121198	0	0	0	0	0	0	0	0	0	0	0	0	0	0	0.150195	0	0	0.152914	0	0	0.171463	0	0	0	0.114104	0.142247
AT1G06930	AT1G06930	0.847864	0.306023	0.680956	0.803448	1.87331	2.70723	1.88415	4.45043	1.52376	2.02041	3.028	2.03618	3.38772	1.98474	1.46576	1.6499	0.595684	0.553248	1.22982	1.30614	0.815918	0.556687	0.700048	0.291398	0.940065	0.451299	0.385904	0.573839	0.0606486	0	0	0.215217	1.55821	0.93284	0.832888	1.58643	0.41851	1.30814	0.569237	0.544968	0.246423	0.723059	0.520868	0.472245
AT1G06950	AT1G06950	62.474	49.9548	53.2441	56.4828	42.9776	47.9932	42.8264	50.1408	75.7855	74.3364	80.602	69.0214	59.5368	54.9066	57.6872	49.354	95.7106	95.9938	89.0873	88.7451	89.4479	85.4447	83.9837	81.8683	129.756	129.308	126.918	125.223	116.802	119.483	116.752	124.437	106.078	101.338	108.785	108.696	71.3352	68.0475	66.7407	69.63	158.421	148.22	139.475	134.38
AT1G06960	AT1G06960	17.0646	16.3028	15.9264	19.0895	12.5181	11.0554	10.2403	14.8697	17.8504	17.8563	15.4879	20.2097	15.1913	14.711	14.3235	14.3853	14.1974	13.6677	13.28	16.8016	19.1655	20.8474	19.2317	18.953	14.0418	15.6532	13.6919	13.485	17.697	15.6348	14.647	18.6961	15.48	14.0255	14.7181	14.9829	18.2946	16.6087	14.8984	16.7669	14.5457	16.24	16.1902	15.8443
AT1G06970	AT1G06970	0.101277	0.106616	0.0474482	0.0447866	0.139853	0.029021	0.0630168	0	0.0707823	0.0272476	0.046886	0.0751122	0.223628	0.2289	0.0197676	0.0591237	0	0.0210271	0	0	0.0310102	0	0.0243892	0.14619	0	0	0.0691439	0.0959624	0.0253555	0.0214983	0	0	0.0521157	0.0216664	0	0	0.0656128	0.0546896	0	0.056959	0	0	0.0593892	0.0246791
AT1G06980	AT1G06980	3.0287	2.8192	2.53917	1.90329	0.528295	0.274067	0.0991858	0.195234	2.37671	3.17361	3.09945	3.07381	0.703962	0.540419	0.622266	0.868543	2.43026	2.38289	1.19629	2.32059	4.49041	2.28947	2.91746	2.45437	3.05656	2.88483	3.40999	2.49217	0.558718	1.48884	1.0397	0.849714	3.19909	2.18252	1.97303	2.67242	2.20313	2.41021	2.34109	3.22744	2.8539	2.53756	2.61733	1.8645
AT1G06990	AT1G06990	0	0	0	0	0	0	0	0	0	0	0	0.0506032	0	0	0	0	0	0	0	0	0	0	0	0	0.046725	0	0	0	0	0	0	0	0.0526656	0.04379	0	0	0	0	0	0	0	0.0509135	0	0
AT1G07000	AT1G07000	13.3939	18.8088	18.5041	19.918	53.9557	36.8095	29.421	36.7763	14.0778	12.5033	10.3826	13.0292	18.662	24.077	12.1594	18.0143	10.9683	10.3473	12.2106	14.4769	24.1108	32.9984	29.9145	41.3053	6.25708	6.13449	5.75595	6.07991	8.14144	7.90795	10.7556	10.9954	11.6689	12.9276	12.6514	12.2065	30.7271	30.983	35.3525	33.8103	8.71988	9.32823	9.18157	8.31894
AT1G07010	AT1G07010	59.4923	68.9134	52.3775	54.1342	15.878	16.8019	19.2583	18.7036	42.9585	42.3601	44.0822	44.2539	21.3982	24.2252	19.4143	17.8937	14.6994	13.4284	14.132	12.9893	9.00181	7.69429	6.64717	7.1121	18.9026	16.5613	15.6483	13.2318	50.3364	42.9217	38.6635	35.4055	11.0101	10.9715	12.5788	12.8781	6.1019	7.01171	4.70146	5.41959	12.1618	10.8876	11.7486	9.91014
AT1G07020	AT1G07020	28.0615	24.8932	27.6083	27.8796	47.5335	38.7043	29.5665	49.0326	24.5806	23.9577	24.9428	25.2518	29.7419	32.7686	24.7567	28.2495	26.3131	23.1491	25.6841	24.8134	28.8699	31.9204	28.3823	28.3542	26.1349	23.4005	23.9264	21.5371	12.6458	12.3105	14.7139	14.7366	27.3399	25.5339	29.9303	29.3051	32.4004	32.0238	30.5519	28.092	22.7601	23.08	22.4525	21.7904
AT1G07025	AT1G07025	0	0	0	0	0.139016	0	0	0	0	0	0	0.124437	0	0.142206	0	0	0	0	0	0	0	0.144589	0	0	0	0	0	0	0	0	0	0	0	0	0	0	0	0	0	0	0	0	0	0
AT1G07030	AT1G07030	17.5433	19.0524	20.1176	18.4983	32.8194	22.7991	15.245	16.5199	13.5239	16.6745	20.5511	15.4908	18.536	22.5747	16.096	15.5823	13.6869	13.3286	12.5119	12.2897	18.2452	18.2446	18.5847	20.4968	12.16	11.6326	11.8897	11.8503	11.1138	9.3869	10.0225	8.2922	17.0447	14.7931	16.6324	18.7398	17.7719	16.9184	18.0541	17.8605	17.3333	18.5161	19.1899	19.0968
AT1G07040	AT1G07040	22.7954	29.462	26.893	21.4919	87.8065	109.17	129.153	95.6433	12.4439	12.7111	12.2597	12.9448	65.3959	47.6952	79.3825	59.6133	67.7456	76.8179	83.4609	88.8342	118.864	144.057	157.149	165.356	28.5078	31.0345	31.2971	31.3296	12.6948	12.9036	12.3827	12.521	41.8494	48.8312	50.5254	47.3764	154.343	165.671	178.727	163.576	35.2035	37.725	37.058	35.7119
AT1G07050	AT1G07050	0	0.0637394	0.35458	0.468565	1.08693	1.12774	0.847663	0.74156	0.423164	0.244345	0	0.374209	1.0027	1.1974	2.1863	1.17822	12.5808	16.7192	17.2401	20.9748	49.3141	35.0455	35.9418	38.2367	7.67075	7.25129	10.0586	8.17524	1.9706	2.5705	2.0907	1.34478	13.008	16.5798	15.1272	16.3363	27.262	28.5269	32.99	35.7549	24.2053	26.054	26.5697	29.3607
AT1G07051	AT1G07051	0	0	0	0	0	0	0	0	0	0	0	0	0	0	0	0	0	0	0	0	0	0	0	0.263778	0	0	0	0	0	0	0	0	0	0	0	0	0.236776	0	0	0	0.223067	0	0	0.267178
AT1G07060	AT1G07060	0.258028	0	0	0	0.190032	0.591506	0.321102	0.210682	0.0801491	0.27768	0.318543	0.170104	0.126611	0.194394	0	0.0669477	0.169197	0.357145	0	0.185497	0.210683	0.19765	0.1657	0.165536	0.157067	0.274685	0.234882	0.40748	0.0861325	0.146059	0	0	0.0885185	0.0736006	0.0788573	0.270364	0.0742955	0.0928902	0.202106	0.19349	0.279974	0.770161	0.336242	0.503008
AT1G07070	AT1G07070	35.634	27.24	33.3891	30.8373	18.0476	13.4471	12.1436	9.66865	40.1538	40.8259	34.3132	45.8629	23.4032	30.2328	18.0621	24.4937	19.1964	18.1202	16.36	15.6069	23.3661	21.5427	22.285	22.3684	23.2263	25.5619	22.0575	25.2452	34.8067	39.38	27.3432	33.3789	29.5646	26.5524	31.2636	35.1549	16.7638	18.9464	19.4519	19.6092	34.3523	30.6536	32.9192	33.7712
AT1G07080	AT1G07080	90.3227	95.0304	87.2999	86.1568	78.7387	81.9922	87.8604	76.2006	63.2351	64.0587	71.0253	63.7251	78.3286	78.44	69.6291	74.6565	69.6984	68.6062	65.4883	77.9199	78.8004	81.1815	76.0361	80.9916	51.4684	52.8432	50.7458	50.6143	55.8782	48.5205	53.6986	55.0599	67.8672	67.3259	70.0937	70.0724	72.9244	76.362	77.7816	82.7329	57.0761	61.5924	55.8493	57.6165
AT1G07090	AT1G07090	16.647	17.1728	19.5448	20.2815	9.89679	10.3451	8.07023	14.2475	17.3195	18.8503	15.723	17.5195	8.16848	12.466	11.953	11.3965	10.2584	11.382	11.8055	12.6164	24.6467	25.9643	23.3772	22.7107	6.89805	9.82166	7.91158	8.5519	6.15953	5.05221	5.23266	4.2765	17.8207	19.7947	20.0439	19.5445	23.3889	22.4555	22.9364	25.8689	16.5396	19.8885	18.1909	18.5721
AT1G07100	AT1G07100	0	0	0	0.753504	0	0	0	0	0	0	0	0	0	0	0	0	0	0	0	0	0	0	0	0	0	0	0	0	0	0	0	0	0	0	0	0	0	0	0	0	0	0	0	0
AT1G07110	AT1G07110	38.4142	41.3271	40.388	39.7143	34.7711	41.0989	49.0718	40.4349	46.302	48.7822	49.514	46.207	49.68	42.7418	58.8177	50.0312	77.2455	83.9646	86.7143	84.7125	90.9066	101.855	108.272	103.242	75.8814	77.376	72.7824	73.4926	66.7402	60.8907	62.2969	61.1302	59.7898	64.042	68.9416	62.0637	100.284	95.3035	100.339	95.0226	67.013	62.042	61.6256	59.2347
AT1G07119	AT1G07119	2.11431	1.86156	1.801	2.54997	2.86656	2.64374	2.75074	1.64788	2.41803	2.27534	6.05087	3.2312	3.39533	3.25817	4.50194	2.91743	2.07963	3.83103	2.4607	2.79815	3.06037	2.53978	3.51785	3.79181	2.5448	3.68312	3.49935	3.18717	3.07976	2.69286	2.21234	2.163	2.47272	3.04287	3.70076	2.92029	2.65652	2.49104	1.80663	4.54022	4.37972	3.15539	3.60681	2.9976
AT1G07120	AT1G07120	0.779533	1.51817	1.36954	1.24963	0.215292	0.335065	0.181892	0.358029	0.726421	0.681611	1.08265	0.433608	0.7172	0.385407	0.532533	0.493002	0.479217	0.364155	0.129048	0.682998	0.775735	0.559806	0.657039	0.562618	0.0889725	0.311196	0.0443504	0.138493	0.243953	0.289579	0.112156	0.230851	0.852418	0.750454	0.357356	0.612602	0.378769	0.894517	0.572426	0.493219	0.198243	0.775584	0.723778	0.617358
AT1G07128	AT1G07128	6.96102	9.06012	10.3767	7.76572	26.3033	19.5843	16.8331	12.0134	5.74962	5.61841	5.27335	7.58756	7.80174	8.04526	6.85515	6.5266	6.84685	7.68609	9.70781	8.78596	9.20385	8.99806	9.98184	9.36296	3.10578	3.7052	4.39241	3.74759	1.02981	1.5448	1.39606	1.96774	4.7218	7.0398	6.3822	5.80192	9.15615	9.14112	10.8738	7.20706	4.24862	4.0925	5.00971	4.08644
AT1G07130	AT1G07130	4.01433	4.1567	4.3164	4.19068	8.65133	5.50642	6.14217	5.15841	4.66069	3.82433	4.38712	4.03473	5.23122	3.5697	3.49378	4.61017	4.01322	4.64549	3.48618	3.76115	5.07785	4.31004	5.76864	4.1797	2.94436	3.78308	2.1566	3.05542	2.1748	2.51449	2.12089	1.79295	3.58962	3.04098	3.19784	4.27521	5.11615	3.26939	4.94844	4.73747	3.05261	4.19042	4.21924	4.04113
AT1G07135	AT1G07135	8.00978	8.41395	9.84549	10.2073	99.3324	37.3158	41.5859	67.5103	5.05629	5.93194	7.65548	4.00291	13.3123	17.8113	17.6847	19.4414	29.3958	28.8967	47.4502	75.5074	35.8651	41.8602	40.4861	35.3902	9.5942	12.8361	16.5426	30.5212	65.0327	100.992	159.404	197.311	16.3097	18.4253	28.5853	50.9881	57.0625	49.3921	59.3992	20.1504	13.1067	13.8818	28.7543	23.5058
AT1G07140	AT1G07140	185.737	163.558	181.187	174.614	257.24	179.973	150.598	221.216	196.681	200.691	200.078	206.4	174.246	187.91	130.545	152.747	141.553	130.985	127.179	138.538	174.316	168.551	158.516	173.091	135.192	132.914	129.076	127.458	120.748	111.744	113.916	125.373	171.722	166.944	169.645	174.37	163.261	160.525	152.809	157.807	156.393	155.65	147.327	154.423
AT1G07150	AT1G07150	2.39667	3.76317	4.14881	3.8083	27.9126	23.1873	26.6912	17.3137	3.55827	2.88523	2.85847	3.13323	10.8831	9.82377	6.88209	5.53332	3.03661	3.10366	3.37133	3.06631	3.28365	3.64062	3.75644	4.53454	2.29964	1.72976	1.73795	2.23242	1.4238	1.41415	1.83905	3.0796	3.1355	2.88517	2.49534	2.63895	4.66688	5.39619	4.00905	4.20366	1.35536	1.33372	1.71509	1.62338
AT1G07160	AT1G07160	0.345451	0.472763	0.930601	0.611061	7.77564	3.41514	2.63311	5.60602	0.201196	0.232351	0.319852	0.256205	0.381393	0.487981	0.337132	0.302503	0.0849462	0.179306	0.343127	0.605342	0.105775	0.148847	0.0415953	0.124662	0.118285	0.183876	0.0393078	0.204577	0.0864865	0.0733298	0.0331345	0.0511509	0	0.0369516	0.158363	0.361967	0.223802	0.046636	0.304405	0.145714	0.0702812	0.17185	0.0675248	0.126269
AT1G07170	AT1G07170	17.4946	22.6018	22.4002	24.6271	44.3198	36.5354	31.004	44.6485	26.8866	29.6699	31.8877	27.8067	29.5285	32.7089	30.2493	32.7246	29.9107	29.2861	30.0027	30.5205	41.2833	44.6231	39.6156	42.0443	28.101	25.157	28.0152	24.7348	15.5935	12.7547	13.4242	13.9965	31.2967	30.8035	30.5682	31.8634	33.7844	35.5133	38.096	39.5626	29.2939	32.6248	32.2271	30.2656
AT1G07175	AT1G07175	2.58766	0.594346	2.42464	2.08057	6.75678	3.50526	3.22021	2.88115	2.63056	3.54422	2.1781	5.58297	4.50177	5.05097	4.04055	2.5635	0.69415	0.58609	0.415394	0.253674	0.864352	0.810883	0.906406	0.67913	0.859182	0	0.856558	0.445796	1.64905	0.599225	1.26356	0.557316	0.726314	1.00652	0.647042	0.985955	0.609611	1.01625	0.552776	0.529209	1.34006	0.23405	1.65536	1.14647
AT1G07180	AT1G07180	48.7997	64.3791	38.2587	45.281	13.2828	17.0552	24.1335	17.6195	39.8562	39.653	37.936	42.0502	26.8867	27.7331	28.0242	17.4554	23.4101	23.0747	27.1465	21.6729	6.08914	7.69765	6.3854	7.97383	24.9835	27.5891	22.179	21.85	41.6664	38.5313	38.2574	37.8414	10.9229	10.4398	9.86003	10.4556	11.7567	9.52021	8.90686	7.81323	10.8464	8.27919	8.71175	7.38922
AT1G07190	AT1G07190	0	0	0	0	0	0	0	0	0.356056	0	0	0	0	0	0	0	0	0	0	0.412028	0	0	0	0	0	0	0	0	0	0	0	0	0	0	0	0	0	0	0	0	0	0	0.298746	0
AT1G07200	AT1G07200	14.1165	17.0635	15.0679	15.3338	33.6626	32.2562	32.8321	31.8931	19.4128	18.3628	17.385	18.6578	37.9965	35.2354	35.1682	30.706	16.1767	16.6557	15.0047	16.0109	20.367	22.1779	24.2917	27.2791	17.499	16.6814	15.1375	15.0207	13.9309	13.1693	15.5295	14.5843	14.1758	15.6766	14.304	13.9777	19.2184	18.9957	20.2624	18.5507	13.7929	13.9314	14.6808	12.8691
AT1G07210	AT1G07210	42.0825	36.4168	36.1742	36.1946	37.1217	30.9696	23.858	24.6417	41.1785	42.5104	45.6451	48.0725	38.4558	40.6521	32.2796	30.9933	31.8601	31.0558	32.1328	32.7144	34.8986	34.2526	35.8186	34.4146	35.4432	32.4079	33.4652	35.0335	26.8997	23.4784	25.5825	25.5797	37.8355	37.1831	38.4384	38.4102	30.9827	31.7974	31.807	36.0198	49.4623	43.3366	44.269	40.6079
AT1G07220	AT1G07220	11.7384	12.1094	11.7344	13.4428	10.3662	8.75164	7.54811	9.96322	10.8389	9.94468	10.9016	10.8315	9.55894	10.7251	7.79963	7.80386	7.08894	5.6002	6.14275	6.38678	9.87589	10.0849	9.96687	10.7123	6.12465	5.81129	5.58629	6.18664	7.96782	7.24043	8.18593	6.93129	8.22526	6.8696	7.13125	8.48635	9.1843	9.67189	10.438	10.3542	7.46206	8.23559	8.20156	6.88583
AT1G07230	AT1G07230	26.9362	29.3026	29.25	25.3918	35.3976	36.5167	33.4066	44.936	23.5909	20.3671	20.9486	23.22	28.8499	30.4054	26.759	31.0333	32.0278	33.2122	32.3665	33.8274	42.5771	41.3485	41.085	44.2218	24.0088	24.932	24.2138	24.6247	18.616	17.7311	17.9711	20.4266	28.3828	29.1462	29.0694	27.6153	38.9556	39.988	40.0175	44.4674	24.3837	24.9441	25.7223	23.2154
AT1G07240	AT1G07240	18.4984	23.6245	23.837	22.2151	34.3491	32.1941	26.2707	36.4602	17.5714	18.8291	18.1546	17.9033	17.3287	19.6106	15.5318	15.7356	18.5117	21.6026	20.2812	23.3046	29.887	34.575	33.2597	36.8421	11.794	12.0745	14.0705	12.6796	6.593	7.59517	8.34644	8.1377	23.4201	23.0249	25.7847	22.9444	32.3908	33.0009	32.748	33.4044	19.2759	22.0358	22.4924	20.4022
AT1G07250	AT1G07250	27.7593	27.2004	28.9518	24.0163	25.7781	29.1303	30.6858	30.0152	19.3129	20.472	24.0916	21.3171	31.5662	28.6349	31.0032	32.4109	28.7176	28.7699	31.3207	31.9328	27.6067	27.6806	24.8818	24.748	28.42	29.6722	26.0955	24.7618	31.8138	27.7448	26.4663	25.8044	23.2757	24.337	22.2264	24.9257	27.7683	26.345	27.0605	27.5233	21.2977	20.6952	20.699	20.7171
AT1G07260	AT1G07260	33.9331	35.9914	37.5794	33.3393	42.5709	45.4675	36.7734	31.3154	13.8194	11.3995	15.5571	15.5677	12.9046	17.6256	12.6618	16.2912	3.77238	3.45814	4.25694	5.00234	8.14207	7.47052	8.05735	8.61176	3.03501	3.14965	3.059	3.63403	0.877893	0.434201	0.700701	0.649018	3.90958	5.25115	4.75547	4.89893	6.34193	6.58794	4.67778	7.10783	4.48847	4.83342	5.39768	4.84201
AT1G07270	AT1G07270	1.03829	0.839446	1.12853	1.24889	0.504687	0.428433	0.361786	0.305197	1.12235	1.29615	1.38434	1.27315	0.550232	0.844806	0.583651	0.937488	0.490203	0.620839	0.513359	0.582213	0.559533	0.715799	0.600091	0.679428	0.644669	0.397913	0.831731	0.55093	1.41409	1.34003	1.33848	1.4759	1.32504	0.639715	1.14234	1.17496	0.466378	0.717666	0.634345	0.654015	1.5885	0.909063	0.746865	1.05252
AT1G07280	AT1G07280	45.6868	47.9219	51.1698	49.4347	41.9974	64.9766	72.4852	48.7319	43.0296	40.2212	37.2931	36.9889	51.0139	53.2181	68.2131	59.9195	74.3948	78.9548	73.4435	78.5958	78.4881	77.3548	67.8825	66.5506	59.9091	58.9165	56.7496	60.4895	66.8994	61.1075	55.8099	55.0962	61.0155	62.3176	62.7337	60.9997	74.5209	70.6629	80.2476	73.8358	62.4219	60.6578	58.5639	56.9232
AT1G07290	AT1G07290	2.67462	2.29848	2.96643	2.60693	1.80901	2.06464	2.17367	1.60447	4.22181	3.40701	3.43668	4.26416	3.1337	4.19453	2.30125	2.80415	1.18116	1.76791	1.92771	2.00128	2.80784	2.57142	2.0506	2.62636	1.39552	1.22027	1.39126	1.24128	0.983924	0.695204	1.13088	0.711242	1.96618	2.19534	3.40309	3.03128	2.87617	1.94539	3.07831	2.45589	2.22101	2.93261	2.9021	2.5006
AT1G07300	AT1G07300	6.34736	6.79037	5.626	6.60008	9.09673	6.78381	5.9776	4.62239	4.87579	7.38466	6.03585	6.70083	7.07091	7.36686	4.62077	5.00741	3.88094	4.98642	4.99829	3.88483	8.92968	5.91338	9.99759	8.74954	4.3076	4.93087	3.35748	3.98244	5.75518	5.82647	7.43746	5.1819	5.73804	5.21143	4.95449	5.93183	7.11296	7.13309	6.85291	6.75371	8.16697	7.766	7.37719	5.60164
AT1G07310	AT1G07310	36.3169	42.3883	39.2736	35.3436	49.1315	53.4135	52.8619	72.1665	33.8829	33.2462	34.0677	35.355	45.0935	45.3557	45.7659	44.7834	53.1337	63.5279	60.3747	64.8497	54.205	63.814	64.2818	67.1409	46.0363	50.4861	46.8042	45.9228	28.8084	27.2996	30.0646	34.4876	47.8257	47.3773	47.8173	44.2363	68.5511	73.3838	71.676	68.7665	41.8423	41.8745	46.8505	43.1382
AT1G07320	AT1G07320	208.976	144.956	150.881	179.732	105.649	108.883	149.544	187.615	303.886	317.995	377.993	277.749	224.869	193.604	248.771	237.143	469.067	462.224	441.488	425.622	398.032	375.187	374.599	369.968	548.671	571.099	583.556	589.735	538.465	563.431	542.7	562.188	473.291	475.593	465.256	484.88	350.295	335.143	330.629	327.212	583.934	570.843	557.904	625.634
AT1G07330	AT1G07330	0.030634	0.0257993	0.0287041	0.0270939	0	0.105339	0.0762449	0.0750388	0.199827	0.164836	0.113456	0.242345	0.0450951	0.103856	0.023917	0	0	0	0	0.132137	0.0375197	0.0703974	0.147544	0.0294796	0.0559428	0.130446	0.111544	0.0290265	0.337457	0.234099	0.188052	0.145151	0.0315277	0.0262144	0.0280867	0.0962959	0.0264619	0.0661696	0.107977	0.103373	0.0498594	0	0.0239519	0.0298595
AT1G07340	AT1G07340	0	0	0	0	0	0	0	0	0	0	0	0	0	0	0	0	0	0	0	0	0	0	0.0720394	0	0	0	0	0	0	0	0	0	0	0	0	0	0	0	0	0	0	0	0	0
AT1G07350	AT1G07350	34.3292	45.3853	36.1316	38.2677	37.2563	30.0433	26.0087	29.5109	35.0081	32.9474	30.386	34.7157	27.3332	29.6693	26.1951	24.2338	21.279	21.8395	21.5026	21.0473	24.9628	23.5675	23.9173	21.4419	22.4741	23.72	23.7812	23.5673	21.4487	18.7358	19.9139	17.7494	29.0645	27.1224	26.4466	28.5049	21.3731	24.2974	23.0333	24.6256	28.0071	34.1553	32.7833	28.0317
AT1G07360	AT1G07360	37.8492	37.6914	40.9908	37.1068	35.009	35.3397	31.0294	31.3614	38.6096	40.009	38.7771	38.2032	38.5179	36.7405	33.4262	29.5482	27.7194	24.9542	27.8808	27.1294	30.0359	31.1371	33.1871	31.5378	30.8446	32.2262	32.993	29.886	30.9508	28.5244	27.4104	29.4919	33.9979	33.4109	37.5767	35.2002	29.4379	29.3881	30.1726	30.7756	35.2363	32.6439	37.5024	35.1823
AT1G07370	AT1G07370	19.3747	12.4838	14.5809	17.7886	6.86276	5.35799	4.97526	5.87587	19.6022	19.5266	22.7797	19.7673	10.8651	12.3724	7.97144	10.8199	8.16726	6.53829	6.08217	6.43366	9.41652	8.622	7.82073	7.93136	11.513	12.0479	9.68621	11.0731	22.5439	21.6734	18.1235	19.3076	14.6226	12.4215	14.0981	16.6275	6.64129	7.17421	6.79294	8.16375	17.2686	19.5826	17.6012	16.4868
AT1G07380	AT1G07380	12.4742	14.204	14.3896	13.2488	12.8579	17.17	13.6795	13.0671	10.5447	9.71307	10.7267	10.1241	14.0795	12.6354	10.2229	11.66	8.05609	8.59198	7.37412	8.30922	9.20646	9.84426	9.68034	9.77444	7.45395	6.79751	6.67091	6.1013	4.96447	3.98049	4.58956	3.95742	9.06713	9.45265	11.5852	10.7275	11.1244	11.028	9.55971	10.8189	8.85784	9.06033	9.71116	7.66822
AT1G07390	AT1G07390	0.871318	1.41869	1.70542	1.84951	4.59892	4.41652	2.21681	3.69949	1.33521	0.937682	0.896392	0.995652	1.65317	1.68485	1.3303	1.20572	1.37124	1.27034	1.52149	2.19238	1.56518	2.18029	1.86515	2.57135	1.23758	1.15431	1.42769	1.54112	1.06647	1.15084	0.965745	0.779832	2.1721	2.08772	2.46761	2.19114	2.42521	2.3212	2.36593	2.70065	1.92237	1.88793	1.57447	1.88731
AT1G07400	AT1G07400	2.31782	10.1505	1.66505	3.07496	7.51093	3.36516	2.49982	3.59579	2.0879	1.49661	1.57378	3.51444	3.41198	4.27821	3.37793	1.92442	1.97583	1.21911	1.29607	0.74983	1.4194	1.50914	0.669807	1.85873	1.34037	2.13846	2.3209	1.75696	1.31532	1.04962	1.30427	1.09824	2.1469	1.78509	1.48756	1.45718	1.00108	1.41851	0.635421	1.30357	2.01197	3.07477	2.71837	3.0876
AT1G07410	AT1G07410	5.6782	5.48531	6.1029	5.39129	5.6271	4.59416	2.80571	2.04543	5.60258	7.90794	6.49449	8.1748	9.21911	6.98298	4.82433	4.74477	2.05333	1.66434	2.06431	2.79142	4.60225	2.87837	3.29788	4.09817	2.59234	2.7557	1.59626	2.05715	1.8397	2.55246	2.30669	1.68155	5.84386	3.42989	5.20604	4.89974	3.96718	2.88587	5.49408	5.07199	3.46566	5.15096	3.78675	3.82542
AT1G07420	AT1G07420	22.6567	23.5194	25.0137	23.1749	23.7235	24.1627	17.7752	25.9394	25.9323	27.7747	30.6459	27.2751	27.1167	32.5613	26.9179	28.6002	38.1753	37.5501	37.9637	38.9318	45.4244	49.1226	52.0468	50.2889	26.0842	25.9545	28.6947	26.5548	22.8865	24.047	23.6213	26.6049	42.0732	40.1248	43.8034	46.6025	54.9691	58.088	55.1489	53.2409	41.1244	41.3105	40.9749	39.799
AT1G07430	AT1G07430	6.83534	21.4776	7.93275	4.57244	13.7607	7.31771	9.32663	8.07421	0.51733	0.672118	0.192756	0.411732	10.3685	12.665	5.63457	4.45624	0.0682561	0.316968	0.153172	0.935396	1.27488	0.757479	0.935838	0.333896	0.0316814	0.0369371	0.189508	0.230136	0.521204	0.353533	0.18637	0.411009	0.214257	0.0890742	0.190872	0.290848	1.55853	0.936827	1.22298	0.936673	0.508253	0.276171	1.24793	0.27056
AT1G07440	AT1G07440	33.6014	47.8422	31.3792	25.9912	4.22102	7.47097	16.2925	10.5981	21.5728	21.2852	19.6658	20.5588	10.6702	8.82629	12.8537	16.4013	19.9518	20.019	22.2254	24.4187	46.9349	39.7058	39.8366	34.2277	24.0625	20.8761	19.4367	22.8937	33.5933	34.065	33.2426	35.4099	27.2374	29.8596	30.0861	28.5549	33.0052	35.3793	32.4807	32.4232	25.1497	24.0391	24.0754	21.8528
AT1G07450	AT1G07450	1.87518	2.28717	1.09058	1.88724	0.142865	0.0741152	0.482806	0.15839	3.25381	2.43552	2.99349	4.66774	0.571112	0.219216	0.504833	0.201324	2.16242	1.9869	0.91344	1.46428	0.316781	0.148593	0.186859	0	2.83398	2.82226	3.00191	2.57327	4.14426	3.67852	3.37394	4.67231	0.931668	0.885321	1.00784	0.609775	0.390985	0.279338	0.303885	0.218197	2.21007	1.28667	0.707798	0.819344
AT1G07460	AT1G07460	0.0811387	0.0683333	0.076027	0	0.0896356	0	0	0.198751	0.907325	0.349274	0.150252	0.56165	0.119441	0.0916928	0.0633478	0	0.0798079	0	0	0	0	0.093229	0	0.078081	0	0	0	0	0	0	0	0	0	0.138866	0.148784	0	0	0	0	0.0912663	0	0	0	0
AT1G07470	AT1G07470	15.4128	15.9492	16.7847	16.677	22.1892	21.8478	22.7512	19.6803	15.967	16.8513	17.6106	16.6194	22.4472	22.2815	20.7702	15.9534	13.4666	14.8085	14.6214	14.6755	17.1702	18.4159	17.3343	19.0527	13.2123	13.2658	13.5824	14.0991	9.81099	9.88474	9.53059	10.0998	14.8921	14.908	14.8076	14.2598	16.9254	17.5755	20.9501	18.6737	13.7437	14.7637	13.9418	13.1052
AT1G07473	AT1G07473	0.0682302	0.114924	0.0639318	0	0.226126	0.156412	0	0.167132	0	0.073427	0	0	0	0.231316	0.159809	0	0	0	0	0	0	0	0	0	0	0	0	0	0	0	0	0	0	0	0	0	0	0	0.0801644	0.0767467	0	0	0.0533475	0.13301
AT1G07476	AT1G07476	0	0	0	0	0.0932354	0	0	0	0	0	0	0	0	0	0	0.065693	0	0	0.0745151	0	0	0	0	0	0	0	0	0	0	0	0	0	0	0	0	0	0	0	0	0	0	0	0	0
AT1G07480	AT1G07480	9.7112	11.5184	10.4453	11.3231	16.144	15.8913	15.427	15.3741	12.0758	13.24	12.5478	10.0045	15.3067	14.7501	13.896	12.7603	12.3776	11.9807	12.5992	14.7485	14.0357	15.5354	17.6864	16.0462	11.7468	11.3354	11.7962	12.2491	9.38115	8.66991	8.84145	8.21151	11.2157	12.8794	12.4251	10.6663	13.5944	14.3664	15.4821	15.3489	10.9268	12.1785	10.4739	10.5614
AT1G07485	AT1G07485	0.476169	0.721835	0.178468	0.505371	0.210413	0	0.355541	0.233278	1.06494	0.922385	0.529061	1.50678	0	0.215243	0.148705	0	0.0936718	0.395449	0.168165	0.205391	0.583199	0.656546	0.183472	0.091645	0.434782	0	0.260073	0.360946	1.90741	0.808621	0.657685	0.22562	0.294036	0.651955	0.960463	0.299361	0.65811	1.02853	0.559456	0.107121	0.387502	0.473757	0.446765	0.278478
AT1G07490	AT1G07490	1.47301	1.90216	1.10417	1.99761	0.325453	0.787907	0.611028	0.48109	3.11133	3.6988	3.4551	3.10745	1.15646	0.776818	0.153337	0.840809	0.579539	0.897089	0.43351	1.05895	2.64601	0.789832	1.13513	1.512	0.896654	0.62724	0.625741	0.744381	2.8519	3.00172	2.33593	2.67547	1.21279	0.588232	1.08042	1.44054	0.508959	0.424228	1.38452	0.994121	1.27864	0.586218	0.691024	1.6272
AT1G07500	AT1G07500	5.32378	9.4391	3.9382	4.46074	1.85725	1.927	1.39477	2.74542	2.34997	5.42772	3.11323	4.15621	4.53717	9.18272	1.31257	2.39911	0.275603	0.2327	0	0.302154	0.34318	0	0	0	0	0.596575	0	0	1.1224	0.475829	0	0	0	0.959098	0	0.293595	0	0	0	0	0	0.278779	0.21908	0.54623
AT1G07510	AT1G07510	23.1474	24.9912	22.0536	22.9192	22.3959	23.3855	22.1086	19.6412	21.1876	20.2121	19.8512	21.009	21.3164	21.249	19.5906	17.3277	16.6453	16.0824	14.4452	16.0814	16.7825	16.3403	17.2174	17.1587	16.7545	14.6792	15.0704	14.6628	14.2417	13.0294	13.3006	13.1849	17.6168	16.6268	17.8936	17.9131	15.7943	15.2657	16.404	16.9931	19.3472	19.3315	18.9095	17.6326
AT1G07520	AT1G07520	7.508	7.57823	8.29972	8.77923	12.7365	11.7644	8.88841	11.2964	8.38527	9.32058	9.89374	9.39874	12.1285	10.6455	7.42051	9.32424	7.63379	8.01007	8.31714	10.7344	8.74787	8.88524	9.58882	9.11929	5.72571	5.62781	5.29867	6.82095	3.6045	4.82302	5.48065	5.32955	7.264	7.41141	7.9923	7.74911	9.83752	10.1738	9.74631	9.10937	6.86512	7.02233	7.07956	6.30406
AT1G07530	AT1G07530	21.4221	25.9093	23.7606	23.088	34.7609	31.6845	27.081	30.0881	20.2576	19.2074	19.1016	17.6717	24.6083	22.7259	20.9989	20.7947	21.0485	21.1534	21.9096	21.637	27.9826	25.9657	30.0268	28.6692	18.0317	17.6516	17.2559	17.9617	13.3202	11.7164	13.1052	13.8267	18.9041	18.9122	19.2053	17.8717	25.0115	26.7517	25.8866	26.4369	17.3595	15.9345	15.7943	14.8611
AT1G07540	AT1G07540	0.0333041	0.0841441	0.031206	0.0294555	0.0367918	0	0.0414453	0	0	0	0	0	0	0.112909	0	0	0	0	0	0	0.04079	0	0.0320809	0	0	0	0	0	0	0	0	0.0394508	0	0	0	0	0	0	0	0	0.0271026	0	0	0
AT1G07550	AT1G07550	0.513698	0.314637	0.743882	0.371728	0.567493	0.481749	0.464924	0.629159	1.34906	1.30667	1.47014	1.03905	0.54996	0.659679	0.401062	0.781527	0.780876	0.639924	0.700938	0.755384	0.543368	0.482926	0.539815	0.6741	1.38583	0.994291	0.95649	0.685865	0	0	0	0	0.336436	0.559474	0.749291	1.02758	0.786624	0.832193	0.466379	0.604082	0.722075	0.58079	0.602471	0.751066
AT1G07560	AT1G07560	4.89223	4.42458	7.00024	5.0729	4.25975	4.97218	3.9288	5.37199	6.62501	8.01398	8.07762	8.12653	5.99548	5.50136	2.22022	3.62042	2.34674	1.64117	1.74478	2.23497	2.15471	3.2675	2.69288	3.38596	2.55258	1.8985	1.38208	1.55279	0	0	0	0	2.13304	2.88719	2.5852	2.42418	2.35238	2.39455	1.81216	2.57524	1.92199	1.91821	2.11041	2.09064
AT1G07570	AT1G07570	7.56049	8.52395	7.73166	9.45499	22.8564	20.3136	11.7861	18.4201	13.5604	11.1547	11.2907	12.8223	14.1811	15.1586	13.2336	9.58673	13.4736	16.1697	16.1138	15.8236	9.60837	11.1624	11.7856	13.4168	14.7346	15.9673	15.6517	16.0222	8.50757	10.1815	10.4488	10.593	14.1816	13.6351	14.4599	14.0551	13.3425	14.3991	13.1811	14.3565	14.4885	15.0039	12.4901	14.0651
AT1G07580	AT1G07580	0	0	0	0	0	0	0	0	0	0	0	0	0	0	0	0	0	0	0	0	0	0	0	0	0	0	0	0	0	0	0	0	0	0	0	0	0	0	0	0	0	0	0	0
AT1G07590	AT1G07590	861.665	919.705	1015.45	778.221	711.218	798.773	732.089	608.17	950.738	970.082	995.531	971.56	1037.8	1266.96	876.372	841.759	478.593	426.975	470.552	429.331	520.689	586.998	589.955	561.978	506.53	417.754	388.381	393.766	223.554	217.773	238.665	227.963	513.741	558.23	540.86	532.305	686.718	632.926	614.725	635.763	324.847	385.013	431.424	412.509
AT1G07600	AT1G07600	10948.8	11629.3	12561.1	9984.14	8389.92	9792.07	8988.32	7997.9	12194.7	12289.1	11861.6	12341.7	12811.9	15768.4	10611.8	10271.1	6281.95	5262.3	5762.71	5540.25	7140.19	7309.51	7630.75	7169.93	6431.45	5378.9	4779.12	5004.02	2922.06	2705.24	2977.6	2868.16	6551.88	6973.92	6881	6777.27	8759.15	7912.58	7486.63	7952.13	4270.61	4941.67	5034.32	4991.32
AT1G07610	AT1G07610	246.109	210.753	276.622	241.461	138.684	163.341	141.633	246.682	318.943	343.538	311.664	348.139	365.334	575.575	233.936	309.469	217.512	126.483	172.713	195.028	173.186	165.326	154.946	150.146	233.032	185.63	146.927	157.25	26.5251	23.1927	26.9934	23.3683	261.24	303.745	277.249	302.397	232.134	203.968	194.338	227.949	200.843	255.98	262.537	238.408
AT1G07615	AT1G07615	8.84635	8.68649	8.54241	7.92656	13.1015	9.38702	7.93213	6.33995	11.1595	11.9313	8.79888	10.1995	8.87114	9.77876	8.50514	7.1865	10.1451	10.3624	10.1639	9.16459	13.6736	12.9165	13.0612	12.7509	10.1586	9.58194	9.49457	10.5418	6.69264	5.37931	5.92848	4.75904	11.4104	9.98326	11.5109	10.4836	11.9128	11.7653	11.9822	12.2535	12.2919	11.1461	10.8433	10.3548
AT1G07620	AT1G07620	6.41809	8.89657	10.7039	11.4615	15.9445	12.601	5.61765	8.42482	5.4371	3.63523	4.09436	4.06916	3.52598	5.7954	1.79815	3.25079	1.17799	0.8926	0.732048	0.960327	1.65489	2.96389	3.60885	3.2211	0.61687	0.915349	0.614986	0.611042	1.32236	1.14727	1.34313	1.27317	1.29578	1.39275	1.35144	1.35143	2.81179	2.42107	2.09263	2.27975	0.899655	0.947144	0.984421	1.07756
AT1G07630	AT1G07630	21.1049	28.5249	29.5871	28.3809	43.7976	41.7612	27.0364	45.8794	20.4969	20.1855	18.3915	19.2687	22.526	24.9175	16.8777	17.4569	14.6001	14.0755	15.1548	15.6865	16.329	16.8693	18.4579	19.3746	11.1631	10.7452	11.2027	11.9166	8.40541	7.35589	7.76591	7.48083	16.8599	18.0832	19.152	18.8619	17.6011	16.0603	16.0764	18.6999	16.4282	15.9767	16.5858	14.8892
AT1G07640	AT1G07640	30.7941	38.9013	30.9207	39.8596	30.4331	35.3919	32.677	29.4589	24.4692	25.616	24.351	26.0072	18.4999	27.0403	26.8686	17.718	16.8636	17.1069	17.0846	17.2317	30.5294	27.4933	28.9817	29.6737	12.235	15.1506	13.3719	13.6428	16.461	16.3242	14.2415	13.753	20.6858	20.6538	21.1751	22.9353	24.3716	25.213	26.2063	26.4465	22.4186	26.3736	23.7843	22.9579
AT1G07650	AT1G07650	16.3226	16.7183	16.1783	16.6393	24.244	20.5259	15.6395	21.5398	17.0216	17.0378	16.3885	15.2079	15	15.311	16.3089	16.7296	28.1192	31.452	30.4721	30.8891	34.621	36.4037	36.3357	39.6772	21.7097	22.6796	20.8189	22.5823	21.7883	21.3899	22.6172	25.4597	31.034	31.4879	33.3216	31.7542	39.6581	40.5556	38.5103	37.3991	28.0252	26.4907	23.8277	24.4258
AT1G07645	AT1G07645	0	0	0	0	0	0	0	0	0.0939988	0	0.186794	0	0.148489	0	0	0	0	0	0	0	0	0.115902	0	0	0	0	0	0	0	0	0	0	0	0	0	0	0	0	0	0	0.0820885	0	0	0
AT1G07660	AT1G07660	31.454	27.6416	27.4222	30.0769	27.3954	21.6317	20.8762	26.1291	27.6967	26.4911	29.883	35.3413	23.755	29.2605	23.1336	24.1283	28.7859	24.9105	20.1239	25.1685	23.5611	28.4937	25.5563	24.9168	27.0552	29.5052	25.4787	25.1386	22.2776	21.0562	23.9958	19.0076	24.6775	27.1502	24.9098	28.7545	24.3351	29.1456	28.3862	26.1505	28.7874	28.3013	32.4343	31.814
AT1G07670	AT1G07670	32.3955	31.3948	33.2098	33.2696	42.8747	41.4211	32.5532	34.6572	31.4005	30.1071	32.3048	33.7266	30.4019	36.9114	22.8855	25.3408	18.8942	14.9318	17.0701	18.7928	21.2354	22.3787	23.2755	22.5494	17.8651	16.6933	15.4423	16.5973	18.1482	18.0655	19.3615	19.4616	24.3178	24.4281	25.699	25.9157	24.3971	24.2871	23.281	26.1167	22.5349	23.491	23.4762	21.1205
AT1G07680	AT1G07680	0.0898073	0.302535	0.336598	0.556004	0.595272	0.205876	0.223521	0.219986	1.00426	0.676532	0.99783	1.42093	0.264404	0	0.0701157	0.419424	0	0	0	0	0.109994	0	0	0.172846	0	0	0	0	0	0	0	0	0	0.0768508	0	0	0.0775763	0	0	0.101017	0	0	0	0
AT1G07690	AT1G07690	0.233499	0.688268	0.875155	0.309774	2.70849	5.35277	5.08511	7.43551	0.761565	0.879492	0.432393	0.577251	1.3749	1.05549	1.09381	1.18138	0	0.0969581	0.103079	0	0	0.402438	0	0.2247	0.106602	0.124286	0	0.110623	0	0	0	0	0	0	0	0	0	0	0	0	0	0	0	0.113798
AT1G07700	AT1G07700	43.2078	50.6346	44.3709	47.4662	28.525	28.138	28.3215	36.0106	36.3561	31.54	32.1095	32.1035	25.6638	34.4512	31.3427	28.3506	20.8093	20.8569	22.6728	22.255	16.9666	14.347	14.2065	15.2806	22.071	22.3716	22.3038	22.5463	46.2897	43.8088	45.1947	40.3542	20.2217	21.2491	22.2483	19.6005	12.7803	13.2818	12.9543	13.409	18.9807	20.5803	19.5993	17.8198
AT1G07705	AT1G07705	13.6742	15.398	14.4203	13.2264	11.3155	12.4742	11.249	12.796	14.1981	13.2552	16.8338	14.0538	13.3064	14.8741	13.215	12.7964	12.2913	11.9091	12.2087	12.9508	11.7297	12.2693	12.4566	12.0993	13.6782	13.6029	12.4243	12.5927	12.6681	12.5673	11.2001	12.558	14.7056	14.068	16.5049	15.1866	11.3916	11.6431	11.7035	12.9039	16.6711	17.5539	17.7992	16.1489
AT1G07702	AT1G07702	0	0	0	0	0	0	0	0	0	0	0	0	0	0	0	0	0	0	0	0	0	0	0	0	0	0.828576	0	0	0	0	0	0	0	0	0	0	0	0	0	0	0.633399	0	0	0
AT1G07710	AT1G07710	0.463564	0.845875	0.687737	0.512493	0.725488	0.664176	0.192294	1.04089	1.25994	1.53819	1.50225	1.29882	1.81972	1.44062	0.603202	0.992278	0.11399	0.224572	0.170535	0.208286	0.236567	0.532639	0.520961	0.148698	0.458546	0.205621	0.21099	0.10981	0.0773715	0.295206	0.148212	0.27456	0.397574	0.264457	0.743781	0.404773	0.500538	0.208605	0.453872	0.434522	0.440119	0.422781	0.483265	0.376537
AT1G07720	AT1G07720	36.1657	63.8674	28.9947	27.8951	20.9057	39.0032	37.4617	32.3625	15.9038	13.2751	17.7163	16.1489	44.6231	58.9288	31.5738	18.1397	12.0643	10.4482	12.5001	15.9853	12.9193	11.9591	12.7265	13.6581	13.3113	13.8035	13.0155	14.7764	24.11	27.5836	29.4722	34.4966	15.112	16.4337	16.8363	19.9021	12.0481	11.9978	11.8993	14.979	19.9061	19.8043	19.8104	18.5138
AT1G07725	AT1G07725	0.0510071	0.0429571	0.0955873	0	0.112697	0.0292323	0.0952135	0.124943	0.0712977	0.054892	0.0944548	0.0252197	0.112628	0.0576418	0.0995575	0	0.125426	0.127081	0.24769	0.0550037	0	0.0879113	0	0.0736274	0.186295	0.0814498	0.139295	0.0724959	0	0	0	0.060421	0.0524952	0.174593	0	0.0534458	0.0660905	0.0275439	0.119858	0	0.0207546	0.076123	0.159525	0.0248588
AT1G07728	AT1G07728	10.3077	12.7762	11.1985	12.2967	19.3316	17.1137	16.4924	18.7061	10.8819	10.4663	9.38535	10.1591	14.5182	14.8605	16.4695	14.0208	13.8438	15.9546	14.5128	15.6944	15.8541	17.1162	18.9346	20.1022	9.47433	10.8638	11.9081	10.9349	6.00144	6.45509	6.64814	6.0442	12.5116	13.4507	12.9671	12.164	16.6837	17.0869	17.5825	18.6818	11.4817	11.7205	11.7543	11.0818
AT1G07740	AT1G07740	2.8937	2.95638	2.8892	3.58722	2.67268	3.18085	2.18425	2.4402	4.42056	4.00749	4.17264	4.01079	4.22479	5.06597	2.79624	3.914	2.96289	2.60014	3.18312	3.32505	3.28268	3.8427	3.56424	3.99438	3.35689	3.15626	2.61254	3.32619	1.54394	2.57785	2.32964	1.62959	4.24749	4.14058	4.02312	3.9019	3.36012	3.07398	3.20477	3.36161	3.84114	3.89379	3.4494	3.19045
AT1G07730	AT1G07730	3.34083	2.81358	3.18085	3.8126	3.21447	4.19986	2.95048	1.97987	6.62812	6.20477	6.08676	6.87373	6.82162	7.91614	3.78625	6.24942	3.44504	2.77449	2.99722	3.19586	3.82778	4.70543	3.84099	4.66684	3.73928	3.0976	2.74684	3.6761	1.18716	2.60791	2.10872	1.02127	5.15745	4.8416	4.44634	5.53314	3.39784	3.84089	3.86187	3.39417	3.50806	4.07447	4.71865	3.72907
AT1G07745	AT1G07745	5.43328	5.79863	4.91543	6.25531	5.89877	6.65715	5.53738	5.04823	5.49956	5.19182	5.89802	5.74335	7.03283	5.02846	6.32636	6.19788	5.80487	7.31292	6.90615	6.41459	9.17866	9.25668	10.693	10.1415	6.11577	6.68155	6.39555	6.96779	5.7225	5.17013	4.9239	4.49414	5.54358	6.69356	6.2698	4.9078	8.69881	8.39725	8.08958	8.95644	6.74669	6.89699	7.50749	7.30471
AT1G07747	AT1G07747	0	0	0	0	0	0	0	0	0	0	0	0	0	0	0	0	0	0	0	0	0	0	0	0	0	0	0	0	0	0	0	0	0	0	0	0	0	0	0	0	0	0	0	0
AT1G07750	AT1G07750	37.4969	41.9052	39.8972	37.6592	23.8888	31.1229	23.8031	24.901	33.1971	30.2766	32.8606	38.0496	43.7775	46.0525	34.3574	40.0147	19.7785	15.6628	17.2421	16.299	26.9217	25.871	25.898	25.2716	14.9002	13.7172	13.6777	15.7157	13.9308	11.7737	14.5403	13.2566	26.5685	25.0288	27.1434	27.143	25.111	27.3028	27.502	28.5862	19.1216	21.6922	21.9971	18.9915
AT1G07760	AT1G07760	0	0	0	0	0	0	0	0	0	0	0	0	0	0	0	0	0	0	0	0	0	0	0	0	0	0	0	0	0	0.743482	0	0	0	0	0	0	0	0	0	0	0	0.871186	0	0
AT1G07770	AT1G07770	284.788	252.366	279.721	285.641	324.698	255.26	236.883	283.938	337.018	375.636	392.75	346.628	360.982	358.683	334.297	303.1	269.854	270.67	261.039	259.654	296.933	306.142	327.519	303.345	312.837	305.302	294.784	306.099	275.182	272.527	267.105	259.373	317.977	300.702	320.664	314.623	247.73	256.389	251.436	249.617	323.471	319.856	329.618	321.24
AT1G07780	AT1G07780	8.0006	5.65987	6.38279	7.68257	9.34348	7.23147	5.34798	8.84696	8.81878	12.3	9.65124	9.99118	8.68161	8.26631	7.24577	6.08515	7.4197	5.54328	6.70052	6.45829	8.56706	7.51179	9.38022	7.7431	7.55569	7.49504	7.28292	7.8407	7.50846	7.06497	7.08632	8.06916	7.62235	8.68509	8.67665	7.61666	5.80523	4.98691	6.12342	8.02217	10.6033	10.3708	10.6164	9.44712
AT1G07790	AT1G07790	54.829	42.0972	42.8664	54.2295	24.5531	24.8804	19.8023	18.0062	58.024	59.1912	57.8125	66.0205	35.2636	40.0694	28.5605	25.3105	34.4504	30.5239	34.5888	32.8266	28.2806	30.9033	27.4073	29.211	42.1671	45.1114	39.8341	43.4299	67.7252	55.5868	57.4677	52.5529	37.4708	38.3343	40.1207	40.6865	25.6232	26.7124	32.108	31.42	56.5133	58.4232	55.0405	51.3355
AT1G07795	AT1G07795	0.739528	0.311407	0.433086	0.163517	0.816972	0.953609	0.57519	0.905747	0.516856	0.795854	1.19827	1.09695	1.22471	1.14912	0.288688	0.863448	0.18185	0.230311	0.326468	0.0996841	0.113219	0	0.267137	0.0889574	0.168813	0.196817	0.0841487	0.437952	0	0	0	0	0.665965	0.474627	0.847543	0.774885	0.0798513	0.199673	0.32583	0.207959	0.300911	0.183945	0.216832	0.270312
AT1G07800.1	AT1G07800.1	0	0	0	0	0	0	0	0	0	0	0	0	0	0	0	0	0	0	0	0	0	0	0	0	0	0	0	0	0	0	0	0	0	0	0	0	0	0	0	0	0	0	0	0
AT1G07810	AT1G07810	23.0269	25.3563	25.4593	24.3021	37.2419	37.4426	32.8937	25.8634	22.4486	23.6949	21.4541	24.3386	29.4411	31.2958	25.5602	24.2067	22.3302	22.0114	21.8101	23.2768	24.9808	26.4374	26.121	29.1988	18.1135	21.1184	19.4032	19.9065	12.9915	11.9484	12.6782	12.6139	25.0153	24.9934	25.622	25.4305	27.2838	26.8929	26.2713	27.7657	26.4371	24.5057	24.3577	22.9365
AT1G07820	AT1G07820	119.969	102.621	104.646	118.681	93.0012	72.6401	79.5692	118.562	131.275	126.573	132.004	127.666	119.906	109.608	95.8693	96.7527	121.891	113.474	120.138	123.378	97.4564	103.113	108.124	95.2399	126.05	125.708	126.18	131.162	106.938	102.424	90.9	93.2529	133.451	120.63	117.159	131.723	105.582	103.023	107.097	111.852	155.027	147.843	139.228	140.157
AT1G07830	AT1G07830	26.0338	23.2368	25.2276	26.5677	32.0375	21.9337	20.0293	25.9806	33.729	35.1206	30.0793	31.0982	28.0601	27.3247	23.9736	26.2106	22.5427	23.3452	22.0032	22.5549	31.4312	34.9411	37.0805	31.9761	25.5319	22.6611	26.3991	23.1216	14.1126	14.1069	12.9763	12.8275	25.1903	24.055	26.6571	25.8796	24.9869	26.5946	30.0645	30.7016	29.5156	30.4772	28.416	26.1708
AT1G07840	AT1G07840	26.1172	22.5692	22.1736	23.5812	17.211	12.4429	14.3572	11.9049	22.687	25.3691	25.9903	21.5147	16.9832	15.6555	15.8515	15.3087	13.8497	14.4096	14.1964	15.7716	19.6377	19.6232	23.5829	23.5158	15.6355	15.3281	11.5358	13.8152	15.6473	12.9199	12.5472	11.8369	19.1193	17.996	19.3646	20.6553	20.2062	18.1504	18.0377	19.3123	18.7035	19.0707	18.3606	17.2664
AT1G07850	AT1G07850	0.0775458	0.0979612	0.0726605	0	0.1285	0.0888836	0.0965018	0.0949753	0.0722623	0	0	0.0383414	0.228304	0.219081	0	0	0.038137	0	0	0.0418109	0.094976	0.0445504	0.0373488	0.0373118	0	0	0	0	0	0	0	0	0	0	0.0355488	0	0	0	0	0.0436125	0.0631062	0	0.0909466	0.0377926
AT1G07870	AT1G07870	24.6652	28.846	22.7597	20.9399	13.0776	10.8315	9.00036	11.2814	25.7823	25.0386	22.0478	23.4124	10.7972	14.2645	8.94932	9.00196	6.57689	4.84476	6.20483	7.21048	8.31487	8.97647	7.49256	8.27304	4.26755	5.04813	4.59612	4.36388	4.23634	4.57676	5.44496	6.91036	6.46032	6.97721	6.59973	5.82663	8.45758	9.80062	8.49743	9.17123	6.57974	6.48298	6.74846	5.88571
AT1G07860	AT1G07860	0.28722	1.08851	0.134563	0.508057	1.74514	0.823033	0.536146	0.351777	0.26765	0.309096	0	0.284023	0.422805	0.48687	0.224243	0.223566	0.141254	0	0	0	0.175889	0.165009	0	0.138198	0	0.152881	0.130728	0	0.143816	0	0.110197	0	0	0.122891	0	0	0	0	0	0	0	0	0	0
AT1G07880	AT1G07880	10.2949	10.0224	9.24813	10.6089	4.90397	5.52117	4.99532	5.43686	13.1141	13.4677	15.2163	13.0757	7.16029	7.47141	6.04666	6.87385	5.15595	3.13752	4.00271	4.48138	6.53584	7.21676	6.50507	5.81695	5.34688	4.47431	5.11561	5.32484	5.29673	4.93204	4.09478	3.748	4.90883	4.76855	4.02668	4.55238	4.97674	4.84525	5.0491	4.40888	5.57249	6.48397	5.90778	5.66176
[truncated: 32,830 more rows]

## Sheet: 3_SignificantGenes
Genes with significantly different expression between mock and elicitor-treated plants
[truncated: 4,588 more rows]

[truncated: 2 more sheets: 4_Reactome, 5_MIAnalysis]
